# Supplementary material for: Genetic and pharmacological evidence for kinetic competition between alternative poly(A) sites in yeast
Source: eLife. 2021 Jul 7;10:e65331. doi: 10.7554/eLife.65331 (PMC8263057; doi:10.7554/eLife.65331)
Supplement: Figure 1—source data 1. — The full list of genes undergoing APA in the 3’end processing mutant allele PAT-assay experiment and their effect size and confect values. [file elife-65331-fig1-data1.xlsx]

## Sheet: Sheet1
name	gene	rna14 average expression	rna14 effect value	rna14 confect value	pcf11 average expression	pcf11 effect value	pcf11 confect value	clp1 average expression	clp1 effect value	clp1 confect value	nab4 average expression	nab4 effect value	nab4 confect value	ysh1 average expression	ysh1 effect value	ysh1 confect value	fip1 average expression	fip1 effect value	fip1 confect value	pap1 average expression	pap1 effect value	pap1 confect value
YAL002W	VPS8	5.84566	0.100897	NA	5.90339	0.205748	0.083	5.73315	0.0443753	NA	5.81589	-0.0293879	NA	5.72392	0.185117	0.087	5.85596	0.0746872	NA	5.79828	0.205448	0.036
YAL003W	EFB1	10.8883	0.0628542	0.022	10.4905	0.0888945	0.042	11.1732	0.00264752	NA	11.1184	0.0719586	0.036	11.2866	0.118252	0.089	11.1582	0.0446003	0.022	10.7814	-0.0744272	-0.012
YAL005C	SSA1	14.03	0.016915	0.007	14.085	0.00718552	NA	13.8347	-0.0128136	NA	13.7897	-0.0184321	NA	14.0842	-0.00126021	NA	13.7195	0.0133707	0.005	14.0169	-0.000632293	NA
YAL007C	ERP2	6.99624	0.0679325	0.009	7.05358	0.0311887	NA	7.64951	0.00143299	NA	7.60637	0.0535971	0.02	7.60872	0.0253699	0.001	7.74143	0.0268783	0.003	7.06468	0.0150583	NA
YAL008W	FUN14	6.47685	0.0737991	NA	6.65763	0.0123286	NA	6.56299	-0.00335782	NA	6.62536	0.0396511	NA	6.72307	0.0187333	NA	6.48165	0.0680228	0.023	5.96049	0.0537278	NA
YAL010C	MDM10	3.06181	0.0112579	NA	4.68443	0.010088	NA	4.39153	-0.0586006	NA	4.23851	-0.0368535	NA	4.28783	-0.00609378	NA	4.63867	-0.0247661	NA	3.76623	-0.0444318	NA
YAL013W	DEP1	5.76747	0.113179	NA	6.70296	0.0128067	NA	6.5129	-0.00350143	NA	6.34527	0.0184271	NA	6.44176	0.0365768	0.013	6.60917	0.0163094	NA	6.12433	0.000738444	NA
YAL016W	TPD3	8.43868	0.00816954	NA	8.49464	0.0056898	0	NA	NA	NA	7.91147	0.0218172	0.01	7.75848	0.00668395	0.001	8.13436	0.00110898	NA	NA	NA	NA
YAL017W	PSK1	6.44064	0.240439	0.148	5.91526	0.393669	0.286	5.04452	0.0819131	0.003	5.26512	0.256699	0.151	5.19135	0.389821	0.277	5.39687	0.0476409	0.012	5.46491	0.0783271	NA
YAL019W	FUN30	5.9626	0.584105	0.38	6.25721	0.432358	0.306	6.1951	0.0781659	NA	6.41138	0.591259	0.461	6.13337	0.499714	0.377	6.3364	0.189387	0.104	6.30547	0.374965	0.207
YAL020C	ATS1	6.70611	0.0172938	NA	7.22072	0.0499985	0.012	7.71706	0.00367471	NA	7.68782	0.0288999	0.007	7.51663	0.0160635	NA	7.38039	0.0168522	NA	7.25407	0.0505821	NA
YAL021C	CCR4	5.79418	0.043119	NA	6.50044	0.0716863	0.029	6.73607	0.00119671	NA	6.62635	0.01556	NA	6.66024	-0.0243193	NA	6.6886	0.0048902	NA	6.00291	0.0197092	NA
YAL022C	FUN26	6.34389	0.0521516	NA	7.01572	0.0555017	0.005	7.74806	0.000536079	NA	7.40164	0.100584	0.052	7.55893	0.0751857	0.045	7.4507	0.0474234	0.018	7.16269	0.069751	NA
YAL023C	PMT2	8.80034	0.0094726	NA	8.68638	0.00266871	NA	9.29993	3.35089e-06	NA	9.0124	0.0244209	0.013	9.14478	0.00794303	0.003	9.51115	-0.00043712	NA	8.76711	0.00187474	NA
YAL029C	MYO4	6.31526	0.485844	0.279	6.15657	0.464276	0.311	6.82982	0.0693783	NA	6.79789	0.277122	0.161	6.81296	0.267863	0.176	6.76077	0.312338	0.191	6.35177	0.184742	0.01
YAL030W	SNC1	6.05147	0.363919	0.183	5.63226	0.160999	0.055	6.45519	0.00277283	NA	5.65976	0.361636	0.225	6.24709	0.109241	0.063	6.05771	0.103841	0.046	6.09465	-0.0113911	NA
YAL031C	GIP4	4.89588	-0.404151	-0.186	5.33252	-0.222491	-0.075	4.74893	-0.186874	NA	5.17817	-0.0901309	NA	4.74434	-0.203871	-0.077	4.72473	0.0101326	NA	5.51388	-0.501539	-0.308
YAL033W	POP5	4.28913	0.0846256	NA	4.77742	0.0708856	NA	5.60854	0.00601182	NA	5.18178	-0.0143272	NA	5.25504	0.00843116	NA	5.34608	-0.0168777	NA	5.12616	0.117875	NA
YAL034W-A	MTW1	5.52591	0.032358	NA	5.33913	-0.173573	-0.034	4.71594	0.0129536	NA	4.94055	-0.15029	NA	4.62885	0.00929842	NA	4.78557	0.103632	NA	4.22571	-0.0677517	NA
YAL035W	FUN12	7.87325	0.116712	0.048	8.20846	0.0313568	0.014	8.25016	0.00319277	NA	8.79105	0.00830319	0.003	8.17319	0.0365466	0.024	8.02178	0.00337077	NA	7.90921	0.0184038	NA
YAL036C	RBG1	6.82384	-0.149082	NA	7.31032	-0.0576833	NA	7.21906	-0.130616	NA	7.21832	0.0146483	NA	7.23872	-0.130796	-0.053	7.06967	0.0347732	NA	7.60153	-0.404459	-0.263
YAL037W		4.75632	-0.141552	NA	4.08286	0.088903	NA	3.73936	-0.00706441	NA	5.81276	-0.0794604	NA	3.70368	0.0521658	NA	3.44271	0.0423225	NA	3.455	0.144166	NA
YAL038W	CDC19	11.1911	0.106914	0.074	11.0913	0.109366	0.079	10.675	-0.0030427	NA	10.9385	0.0173119	NA	10.7973	0.0781804	0.053	11.186	0.0820993	0.059	11.0065	0.0773487	0.04
YAL040C	CLN3	5.94905	-0.0563256	NA	7.11232	0.0252238	NA	6.50295	-0.0487324	NA	6.6305	0.0598872	0.008	6.13938	0.0644509	NA	6.722	0.0136601	NA	6.18699	-0.0996214	NA
YAL041W	CDC24	6.13269	0.539237	0.308	6.51489	0.370883	0.242	7.04356	0.0128415	NA	6.7391	0.366143	0.249	7.02184	0.336604	0.247	7.05361	0.171926	0.102	6.98377	0.0735427	NA
YAL043C	PTA1	6.24041	0.0637036	NA	7.3508	0.0701953	0.034	7.39196	0.0026895	NA	7.00213	0.0858484	0.044	7.36419	0.040803	0.021	7.18702	0.0157812	NA	7.09261	0.0363413	NA
YAL047C	SPC72	3.6718	0.0782865	NA	3.7362	0.112733	NA	3.6407	-0.00749502	NA	3.83982	-0.00149165	NA	3.67504	0.0779793	NA	3.61974	-0.00447989	NA	3.33123	0.127718	NA
YAL051W	OAF1	5.72465	0.117944	0.033	6.25833	0.0785228	0.016	5.36935	0.0329707	NA	5.6507	0.0761643	0.011	5.33978	0.0712545	0.014	5.62174	0.0497391	NA	5.6139	0.121291	0.037
YAL058W	CNE1	4.12698	0.256272	NA	4.70177	-0.0774015	NA	5.34718	0.0540049	NA	5.33974	0.17001	0.034	5.24878	0.275516	0.147	5.41414	0.108436	NA	4.76549	0.0105805	NA
YAL061W	BDH2	4.45449	0.774462	0.547	5.23804	0.620759	0.466	4.54155	0.0318235	NA	4.62054	0.122138	NA	4.87479	0.197422	0.089	4.20338	0.189478	0.037	4.95409	0.590765	0.334
YAL062W	GDH3	4.86276	-0.0285196	NA	5.05013	-0.0138899	NA	5.55744	0.0283948	NA	5.48923	0.119257	0.038	5.50466	0.0645627	0.016	5.04077	0.00290934	NA	5.66025	-0.0167674	NA
YAL063C	FLO9	2.99491	0.405687	0.003	3.34259	0.246329	0.019	3.54679	-0.0163773	NA	2.89124	0.225932	NA	3.23533	0.0859908	NA	3.1865	0.0332313	NA	2.80145	0.0803237	NA
YAL063C-A		1.52423	0.049908	NA	2.13604	-0.0854745	NA	2.93645	-0.0695216	NA	2.94781	0.0495841	NA	2.90562	0.100806	NA	2.74427	0.140601	NA	2.376	-0.00207009	NA
YAR002C-A	ERP1	6.96076	0.0588717	NA	6.98849	0.232868	0.124	8.08347	0.0387986	NA	7.50037	0.195332	0.113	7.88894	0.137181	0.09	8.16177	0.110936	0.066	7.20895	0.144316	0.028
YAR002W	NUP60	6.532	0.0964304	NA	6.68309	0.139427	0.057	6.85346	0.0047131	NA	6.44884	0.180107	0.086	6.88579	0.0945088	0.047	6.89821	0.154247	0.086	6.37983	0.113024	NA
YAR007C	RFA1	5.61929	0.0530322	NA	6.00274	0.0197709	NA	NA	NA	NA	5.53566	0.106505	0.049	5.1646	0.0558362	0.016	NA	NA	NA	NA	NA	NA
YAR008W	SEN34	4.7058	0.0851677	NA	4.71904	0.0815308	NA	4.81136	0.0028703	NA	5.11987	0.0267604	NA	4.76546	0.0955313	0.036	NA	NA	NA	5.13406	0.0332166	NA
YAR015W	ADE1	6.61796	-0.0788467	NA	6.50012	0.0293126	NA	6.36642	-0.0208507	NA	6.37458	0.203534	0.097	6.40035	0.12742	0.057	6.51035	0.038663	NA	5.95932	0.0508202	NA
YAR018C	KIN3	5.19934	0.0695196	NA	5.57631	0.163604	0.024	6.41871	-0.000935767	NA	5.65557	0.244249	0.105	6.3467	0.112251	0.049	6.24333	0.0464382	NA	5.71078	0.039964	NA
YAR019C	CDC15	5.10957	0.492652	0.246	5.418	0.3308	0.178	5.24242	0.118749	NA	5.26247	0.273329	0.121	5.4275	0.383854	0.251	5.40613	0.198489	0.068	5.12416	0.202237	NA
YAR027W	UIP3	5.44512	0.348375	0.134	5.9055	0.314125	0.192	6.04773	0.0799141	NA	6.35886	0.175549	0.101	6.23431	0.199877	0.138	6.25779	0.169571	0.1	5.82169	0.180009	0.046
YAR028W		3.69592	-0.0715144	NA	4.61457	0.0510813	NA	4.64901	-0.0328579	NA	4.63109	0.0529302	NA	3.86845	-0.0157664	NA	4.40786	0.0240197	NA	3.72123	0.0303517	NA
YAR029W		3.91666	0.365913	0.035	4.51784	0.242325	0.068	4.35161	0.14718	NA	4.36749	0.00323034	NA	4.50628	0.21633	0.084	3.97001	0.185771	0	3.79119	0.109246	NA
YAR035W	YAT1	5.58884	0.763583	0.586	5.83671	0.546356	0.388	5.92299	0.0634867	NA	5.84164	0.4068	0.25	5.82803	0.224055	0.124	5.98358	0.244126	0.121	6.03057	0.468232	0.25
YAR042W	SWH1	7.26997	-0.0416412	-0.012	6.81685	0.0174691	NA	6.97895	-0.0234784	NA	7.48749	-0.0172145	NA	6.81636	-0.0186607	NA	7.0288	0.0479564	0.013	7.92092	-0.0337069	-0.007
YAR068W		2.25139	-0.039702	NA	2.38129	0.0535948	NA	1.91637	0.0478621	NA	1.2176	0.614062	0.241	1.97227	-0.0163691	NA	1.86774	0.215248	NA	4.05452	-0.224176	NA
YBL001C	ECM15	8.4717	0.0475582	NA	8.3761	0.132922	0.075	8.89175	-0.0149718	NA	8.19919	0.344476	0.244	8.79334	0.0470486	0.024	8.45355	0.0186458	NA	8.18821	0.048341	NA
YBL002W	HTB2	9.29271	0.215321	0.126	9.43351	0.330007	0.25	10.4723	0.0233123	NA	10.5449	0.105539	0.071	10.5144	0.15544	0.122	10.2333	0.152194	0.116	10.0319	0.203539	0.13
YBL003C	HTA2	8.89181	0.3567	0.246	8.94391	0.306387	0.223	9.45799	0.0362517	NA	9.51025	0.205028	0.142	9.43976	0.200392	0.155	9.5153	0.127845	0.094	9.54321	0.0905589	0.047
YBL004W	UTP20	5.26674	0.530896	0.256	5.59988	0.382932	0.223	6.31502	0.00292183	NA	5.59366	0.22691	0.102	5.93076	0.215772	0.133	5.53143	0.112721	0.024	5.39896	0.13637	NA
YBL006C	LDB7	7.20293	-0.00975269	NA	7.41366	-0.0522482	NA	8.13961	-0.0208821	NA	7.71583	-0.0246012	NA	8.01546	-0.00341569	NA	7.96339	0.0181917	NA	7.42591	-0.0136073	NA
YBL007C	SLA1	6.74555	0.411869	0.229	6.76953	0.498853	0.364	7.48699	-0.0118581	NA	6.92614	0.246848	0.144	7.27725	0.0577536	0.02	7.01664	0.197199	0.116	6.86728	0.377501	0.198
YBL008W	HIR1	4.67384	0.56738	0.288	5.05387	0.516965	0.345	5.04645	0.119097	NA	4.7659	0.657347	0.471	5.08827	0.32479	0.19	5.2893	0.132722	0.023	4.55137	0.37086	0.058
YBL010C		4.70901	0.0317158	NA	5.32591	0.0702891	NA	5.46865	0.00763857	NA	5.57612	0.0910064	NA	5.29887	0.154823	0.05	5.59977	-0.00175509	NA	4.87881	-0.0514831	NA
YBL011W	SCT1	5.64614	0.175198	NA	5.81147	0.325805	0.184	5.77385	-0.0903254	NA	5.81858	0.165507	0.037	5.80697	0.204498	0.096	5.75452	0.0819225	NA	5.91413	0.0430683	NA
YBL014C	RRN6	4.44798	0.280686	NA	5.53996	0.143979	0.026	5.66535	0.0832533	NA	5.46901	0.225874	0.096	5.46552	0.339823	0.214	5.42402	0.154992	0.044	5.27775	0.167786	NA
YBL016W	FUS3	6.07718	0.0814935	NA	6.57008	-0.000714922	NA	6.25752	-0.0555164	NA	6.26528	0.0534737	NA	6.22119	0.0879617	0.031	6.37206	0.114139	0.051	6.44389	0.10323	0.01
YBL018C	POP8	2.26666	0.387633	NA	3.34454	-0.144918	-0.012	4.26446	-0.0227197	NA	4.09363	-0.0369742	NA	3.65458	0.0358313	NA	3.88407	-0.0984793	NA	3.40296	0.0813818	NA
YBL019W	APN2	2.66089	0.235271	NA	3.55984	-0.0376456	NA	3.8095	-0.013666	NA	4.09957	0.126044	NA	3.597	0.0720049	NA	3.9073	-0.0304185	NA	3.28911	0.0267945	NA
YBL024W	NCL1	5.69477	0.353557	0.125	6.01874	0.316822	0.173	6.41431	0.00677708	NA	6.33543	0.200631	0.083	6.24492	0.298856	0.19	5.95172	0.19352	0.068	5.41108	0.459885	0.196
YBL026W	LSM2	6.22209	0.257407	0.048	6.80834	0.0888566	NA	7.18321	0.0500328	NA	6.72942	0.289527	0.169	7.04435	0.199225	0.125	7.17553	0.127957	0.061	6.47961	0.140973	NA
YBL027W	RPL19B	9.50211	0.555612	0.445	9.15697	0.254255	0.164	10.0162	0.0679793	NA	9.56247	0.330278	0.23	10.1645	0.261834	0.192	9.75457	0.40686	0.303	9.28026	0.185447	0.087
YBL028C		5.41322	0.108077	0.018	5.62878	0.0344602	NA	6.01323	-0.0179307	NA	6.02828	0.0784176	0.014	5.78515	0.114753	0.062	5.69863	-0.0291433	NA	5.8193	0.0393289	NA
YBL029C-A		6.8034	0.0108967	NA	6.49883	0.202251	0.106	6.70176	0.00636373	NA	6.49004	0.0877785	0.026	6.66589	0.0500404	0.013	6.52611	0.0285692	NA	6.14149	0.0438418	NA
YBL029W		3.62141	0.620917	0.245	4.20116	0.367563	0.137	4.87218	-0.0264447	NA	3.91284	0.377144	0.131	4.69117	0.206414	0.093	4.55522	0.054644	NA	4.59146	-0.0968206	-0.025
YBL030C	PET9	9.58476	0.0391675	0.025	9.72945	0.0356477	0.022	9.47945	-0.00406089	NA	9.47831	-0.220784	-0.151	9.70365	0.0206204	0.01	9.56578	0.00100495	NA	9.1958	0.00162104	NA
YBL033C	RIB1	5.91731	0.451367	0.264	5.91508	0.449709	0.309	5.8042	-0.0203777	NA	5.5699	0.129695	0.025	5.50967	0.247747	0.142	5.80905	0.151021	0.058	5.50775	0.327069	0.113
YBL035C	POL12	4.72775	0.0325975	NA	5.3439	0.0210196	NA	5.64741	-0.033965	NA	6.54931	0.0234294	NA	5.10224	-0.0371715	NA	6.07236	-0.00128133	NA	5.6369	0.0260762	NA
YBL036C		7.34666	0.0129462	NA	7.48608	0.0106175	NA	NA	NA	NA	7.33532	0.00712483	NA	6.99291	0.0158403	0.005	6.98307	0.00239571	NA	7.11599	0.0133971	NA
YBL038W	MRPL16	6.17315	0.0241452	NA	6.49364	0.00185887	NA	5.76536	0.0126622	NA	6.08971	-0.00100077	NA	5.82474	0.0498704	0.008	6.23356	-0.0272793	0	5.84715	0.00917117	NA
YBL039C	URA7	5.40623	0.14217	NA	5.86424	0.128421	NA	6.77688	0.00687907	NA	6.89914	0.0770533	NA	6.53857	0.0975301	0.03	6.37412	0.165063	0.067	6.07117	0.308106	0.092
YBL040C	ERD2	7.28816	0.387268	0.242	7.25751	0.310305	0.203	7.41463	0.0172482	NA	7.18297	0.097353	0.029	7.2739	0.263444	0.185	7.5316	0.245647	0.161	7.0218	0.29922	0.142
YBL041W	PRE7	7.38952	0.311324	0.176	7.76771	0.314808	0.21	6.79589	-0.00632463	NA	7.25202	0.0716743	NA	6.79252	0.241794	0.15	7.11946	0.10239	0.022	7.03057	0.331198	0.184
YBL042C	FUI1	7.25933	-0.0176091	NA	7.27227	0.00124463	NA	7.4493	-0.00568845	NA	7.4606	0.014141	NA	7.11469	-0.00631897	NA	7.27665	0.00661022	NA	7.79805	-0.00609042	NA
YBL044W		0.574793	-0.236398	NA	1.18207	0.188729	NA	1.68965	-0.0861046	NA	1.37987	0.179683	NA	1.55245	0.0881675	NA	1.06602	0.0677811	NA	1.06508	-0.320862	NA
YBL045C	COR1	9.67492	0.0422486	NA	9.88532	0.067294	0.027	9.44798	0.0259265	NA	9.54249	0.0827484	0.04	9.68391	0.0804349	0.05	9.31365	0.0180157	NA	9.06841	0.0388807	NA
YBL046W	PSY4	4.50505	0.270796	0.096	4.49315	0.219917	0.072	3.91602	-0.134126	NA	4.25065	-0.156159	NA	3.83564	-0.0813309	NA	4.47499	0.213735	0.066	4.77325	0.221601	0.04
YBL047C	EDE1	6.42962	-0.0701037	NA	6.87755	0.010427	NA	7.08477	-0.0738294	NA	6.42303	0.067981	NA	7.14084	0.0644303	NA	6.91561	-0.00777168	NA	6.46573	0.153729	NA
YBL051C	PIN4	3.46897	-0.0180257	NA	4.36039	0.000226446	NA	4.65854	0.0359733	NA	4.70481	0.0383841	NA	4.12215	0.305825	0.126	4.78802	0.0834152	NA	4.28997	-0.0656842	NA
YBL052C	SAS3	6.14327	0.110848	NA	5.93468	0.238842	0.133	6.1458	-0.00205198	NA	6.10236	0.249063	0.154	6.07815	0.162709	0.106	5.80086	0.034422	NA	6.31437	-0.0113838	NA
YBL055C		3.81465	0.0516266	NA	3.86545	-0.0709667	NA	4.62921	-0.0431912	NA	3.99837	0.0844187	NA	4.18254	-0.0740371	NA	4.71407	0.0785688	NA	4.2872	0.0132086	NA
YBL056W	PTC3	6.31564	-0.00516945	NA	7.03656	0.027377	NA	6.76265	-0.00263875	NA	6.75728	-0.226655	-0.11	6.82046	0.0736278	0.01	6.70321	0.0188952	NA	6.57883	-0.058166	NA
YBL059C-A	CMC2	4.77619	0.0302957	NA	5.21396	0.216082	0.058	5.7237	0.0942803	NA	5.33031	0.147748	0.018	5.64566	0.0884496	0.009	5.49843	0.20228	0.08	5.16527	0.0357207	NA
YBL059W		4.14044	-0.101744	-0.021	4.5751	-0.0614867	NA	5.18648	-0.0381837	NA	4.90527	-0.053134	NA	4.72492	0.0924531	NA	4.41495	0.0399372	NA	4.61745	-0.0424894	NA
YBL060W	YEL1	4.5649	0.031066	NA	4.70539	0.135445	0.027	4.45763	-0.0209383	NA	4.26164	0.156706	0.031	4.4234	0.165297	0.068	4.4435	-0.00290839	NA	4.54935	0.0642517	NA
YBL064C	PRX1	8.25285	0.0167575	NA	8.40579	0.0172396	0.008	7.33267	0.00390683	NA	7.65541	0.0366904	0.02	7.58472	0.0250106	0.014	7.79938	0.000459254	NA	NA	NA	NA
YBL066C	SEF1	4.57527	0.173983	0.089	6.21118	-0.000539474	NA	5.62872	-0.0160202	NA	5.60977	-0.0870247	NA	5.47155	0.0687465	NA	5.57846	0.0349929	NA	5.26279	0.100051	NA
YBL067C	UBP13	4.98559	0.207749	0.017	5.1246	0.19348	0.068	4.51866	-0.0044348	NA	4.66003	0.112551	NA	4.45858	0.215526	0.093	4.83353	-0.0448205	NA	4.36349	0.0871002	NA
YBL068W	PRS4	5.91725	0.0889823	NA	6.24507	0.183144	0.074	6.18639	0.0049184	NA	6.11358	0.0436986	NA	6.08252	0.245652	0.15	6.12165	0.0939396	0.019	5.74649	0.0938809	NA
YBL068W-A/YBL069W	AST1	6.176	0.184421	NA	6.34515	0.017953	NA	5.91438	-0.000166379	NA	6.00043	-0.0926294	NA	5.96211	0.33904	0.236	6.1214	-0.0516449	NA	6.05627	0.182502	0.034
YBL072C	RPS8A	9.49693	0.290622	0.209	9.31156	0.348682	0.277	9.76119	0.037625	NA	9.76299	0.353956	0.277	9.86577	0.216157	0.173	9.82014	0.120406	0.076	9.54649	0.0796808	0.026
YBL078C	ATG8	5.23406	-0.192544	NA	5.50636	0.0215835	NA	4.3443	-0.0982346	NA	5.25461	-0.00811344	NA	4.42438	-0.093267	NA	4.55159	0.118205	NA	4.36843	0.047458	NA
YBL079W	NUP170	8.85035	0.0302385	NA	8.91761	0.027612	0.009	9.45904	0.00193144	NA	8.8764	0.0511184	0.028	9.4317	0.0628659	0.046	8.92302	0.0217166	0.008	8.85124	0.0362277	0.003
YBL083C		5.47862	0.0722403	NA	5.6708	0.0318529	NA	6.35276	-0.00549696	NA	6.50814	0.0161754	NA	6.09494	0.0819087	0.037	6.14798	-0.0112694	NA	6.00824	0.0222058	NA
YBL084C	CDC27	4.22286	0.510883	0.239	4.20231	0.393843	0.185	3.53042	-0.000366898	NA	3.73325	0.480511	0.242	3.95743	0.410918	0.212	3.56716	0.0612576	NA	3.12209	0.608226	0.244
YBL087C	RPL23A	9.42998	0.0463076	0.022	9.52226	0.0266562	0.014	10.0301	0.00122866	NA	9.96662	0.00828206	0.003	10.0108	0.0368072	0.028	9.72609	0.00114848	NA	9.37977	0.0269097	0.008
YBL088C	TEL1	3.38195	0.0770173	NA	4.11554	0.153184	NA	4.01816	0.0125546	NA	3.39683	0.22866	NA	4.16108	0.138841	0.037	3.8484	0.129573	NA	3.63161	0.00397321	NA
YBL089W	AVT5	3.08245	0.00506762	NA	4.33227	0.0784674	NA	4.60142	0.0600659	NA	4.04694	0.29796	0.088	4.20195	0.0213331	NA	4.53164	0.170847	0.03	3.26164	0.331998	NA
YBL092W	RPL32	10.3863	0.274961	0.181	10.3947	0.190955	0.111	11.3095	-0.0395432	NA	10.8109	0.148852	0.07	11.0973	0.0633013	0.02	10.6583	0.261487	0.186	10.3944	0.072789	NA
YBL095W		5.43273	0.076864	NA	6.32282	0.0606417	NA	6.77714	0.0464125	NA	6.33644	0.0627239	0.012	6.81542	0.0899611	0.053	6.53446	0.0946792	0.045	6.25433	0.170806	0.04
YBL097W	BRN1	8.01553	-0.0692532	-0.037	8.40602	-0.0485231	-0.022	8.0391	-0.0236824	NA	8.217	0.0655188	0.021	7.92247	-0.0560913	-0.035	7.93336	0.0292708	NA	7.6672	-0.049439	-0.009
YBL098W	BNA4	6.78609	0.0834277	0.032	6.8596	0.000148432	NA	5.44363	-0.00282871	NA	6.33462	-0.0101454	NA	5.85549	0.0329103	0.006	5.71371	-0.000100229	NA	6.11128	-0.0106162	NA
YBL099W	ATP1	7.92251	0.106306	0.033	8.35038	0.0918691	0.036	8.2363	0.016007	NA	8.4747	0.0653887	0.007	8.41646	0.107048	0.066	8.17552	0.0801292	0.035	7.74666	-0.00422542	NA
YBL102W	SFT2	5.58737	0.272643	0.085	5.90981	0.253317	0.125	6.34888	-0.0161702	NA	6.22246	0.14597	0.033	6.28171	-0.00865949	NA	6.29895	0.214339	0.109	6.19024	0.158756	NA
YBL103C	RTG3	3.8332	0.297493	NA	4.28052	-0.0124511	NA	4.18313	0.0201394	NA	4.34969	-0.18235	-0.047	3.95906	-0.000788595	NA	4.41002	-0.0475021	NA	3.87059	-0.167039	NA
YBL105C	PKC1	5.67081	0.0790952	NA	5.80526	0.153335	0.047	6.64014	-0.0211087	NA	6.02922	0.0764516	0.003	6.35156	0.0123783	NA	6.57691	0.0243642	NA	5.80553	0.0681968	NA
YBL107C	MIX23	6.52541	-0.00122974	NA	6.63914	0.00131541	NA	6.8163	-0.000368593	NA	6.65808	0.00576478	NA	6.71207	-0.0035992	NA	6.78266	0.00657023	NA	6.21566	0.0317002	NA
YBL109W		0.535439	0.290733	NA	1.39997	0.285831	NA	1.11002	-0.276566	NA	0.252761	-0.226	NA	0.878108	0.25015	NA	0.274541	0.338272	NA	1.01354	-0.247699	NA
YBR001C	NTH2	6.33591	0.172597	NA	6.95258	0.208934	0.091	6.89451	0.0670572	NA	6.61077	0.0861231	NA	7.10329	0.17317	0.09	6.97986	0.13909	0.04	6.58334	0.150965	NA
YBR002C	RER2	5.73756	0.562618	0.315	5.988	0.387821	0.233	6.28623	0.112864	NA	6.0685	0.00468541	NA	5.91831	0.392867	0.263	6.17825	-0.0524625	NA	5.84413	0.147336	NA
YBR003W	COQ1	5.73536	0.251286	0.1	5.65531	0.101243	0.03	5.74215	0.0427528	NA	5.79639	0.15687	0.081	5.81245	0.145133	0.091	6.10625	0.0657192	0.029	6.17774	0.00183723	NA
YBR005W	RCR1	4.63917	0.406622	0.169	5.17533	0.51397	0.369	4.66442	0.0937306	NA	4.58183	0.325112	0.173	4.59472	0.24984	0.144	4.8271	0.113194	0.036	4.45908	0.107797	NA
YBR006W	UGA2	5.83421	0.262507	0.152	5.78407	0.134049	0.072	4.29345	0.0215301	NA	4.95804	-0.000266419	NA	4.70214	0.1946	0.11	5.0792	-0.00846993	NA	5.57256	-0.0192041	NA
YBR007C	DSF2	5.58031	0.577058	0.353	5.84116	0.422793	0.28	5.96484	0.0600055	NA	5.78001	0.221591	0.108	5.8668	0.222362	0.135	5.95086	0.109036	0.033	5.70883	0.336106	0.124
YBR008C	FLR1	5.40926	0.24359	0.09	5.77781	0.238054	0.136	5.14932	0.0585181	NA	5.09342	-0.0994106	NA	5.13057	0.260712	0.157	5.07171	-0.0347898	NA	4.7813	0.151018	0.038
YBR009C	HHF1	9.804	0.135742	0.091	9.88661	0.0269977	0.014	9.94975	0.0110507	NA	9.6034	0.0907087	0.062	10.091	0.463798	0.383	10.2608	0.0188085	0.011	10.2523	0.0462339	0.025
YBR010W	HHT1	10.8317	0.279243	0.212	10.8621	0.0623733	0.044	10.7387	0.0067402	0	10.7014	0.20002	0.144	10.9131	0.0523144	0.041	11.0747	0.0060498	0.003	11.3764	0.016257	0.008
YBR011C	IPP1	11.2301	0.0357259	0.026	10.6688	0.0384075	0.028	10.5802	0.00526037	0.001	10.6743	0.0537781	0.039	10.5348	0.0306858	0.024	10.7213	0.00819388	0.005	11.0646	0.00228728	NA
YBR012W-B	NA	NA	NA	NA	NA	NA	NA	NA	NA	NA	1.0979	0.880709	0.66	NA	NA	NA	NA	NA	NA	NA	NA	NA
YBR015C	MNN2	5.44175	0.34658	0.125	5.49082	0.28004	0.145	6.03542	0.0440441	NA	5.93954	0.191387	0.109	5.89378	0.263414	0.184	6.09626	0.149026	0.086	5.43135	0.194048	0.034
YBR016W		6.58402	0.0923138	NA	7.29167	0.126244	0.072	6.93349	0.000107915	NA	6.97871	0.120808	0.066	6.89059	0.0722283	0.039	6.80362	0.0436543	0.01	7.18154	0.0193868	NA
YBR017C	KAP104	6.98037	0.433785	0.278	7.06114	0.453199	0.332	6.80845	0.002283	NA	6.85079	0.201595	0.088	6.89031	0.209137	0.123	6.7624	0.152183	0.062	6.55713	0.175766	0.01
YBR020W	GAL1	1.31047	0.276858	NA	2.72395	0.250676	NA	2.81476	0.0741701	NA	2.96279	0.163178	NA	2.73855	0.239062	0.005	2.73259	0.0878027	NA	2.47231	0.0311617	NA
YBR023C	CHS3	5.91708	0.275849	0.097	6.04298	0.0669676	NA	6.04959	0.0641832	NA	5.86472	0.332268	0.198	5.89942	0.274949	0.177	6.03511	0.0109527	NA	5.72524	0.150644	NA
YBR024W	SCO2	7.20514	-0.203566	-0.107	7.18043	0.0122117	NA	7.47973	-0.0155155	NA	7.32093	-0.0585961	NA	7.49629	-0.0134624	NA	7.51396	0.0108936	NA	7.87617	-0.215524	-0.126
YBR025C	OLA1	9.3515	0.286212	0.196	9.54595	0.366384	0.293	9.55991	0.0210097	NA	9.44515	0.11202	0.043	9.65978	0.268462	0.213	9.28055	0.0845733	0.044	8.89438	-0.043734	NA
YBR026C	ETR1	6.95286	0.0142599	NA	6.75984	0.0580062	0.022	6.39696	0.0241476	NA	6.77814	0.0252928	0.005	6.54233	0.0682224	0.04	6.86968	0.0135808	NA	6.83587	0.0187109	NA
YBR029C	CDS1	7.09177	0.409302	0.288	6.94281	0.393343	0.293	6.07825	0.109999	NA	6.07537	0.240687	0.12	6.09527	0.335371	0.228	6.50221	0.324355	0.209	7.0689	0.399664	0.269
YBR030W	RKM3	3.46548	0.469191	0.209	4.16866	0.317191	0.098	4.14167	0.0302024	NA	4.31564	-0.0853724	NA	4.05266	0.4566	0.258	4.26691	0.124951	NA	4.17258	0.165476	NA
YBR031W	RPL4A	10.4167	0.00693859	NA	10.2572	0.00975926	0.004	10.413	0.000150496	NA	10.4274	0.00644689	0.002	10.4019	0.0153152	0.01	10.0702	0.00308437	NA	9.97456	0.00173958	NA
YBR033W	EDS1	2.18298	0.117537	NA	3.71478	-0.0126835	NA	3.78891	0.0695764	NA	3.5712	0.0817952	NA	3.2026	0.0860929	NA	3.77151	-0.0262468	NA	3.21941	-0.134205	NA
YBR034C	HMT1	5.30848	0.120497	NA	6.61962	0.0644419	0.015	6.35413	0.0114484	NA	6.43186	0.0618044	0.014	5.94062	0.0580647	0.013	6.65697	0.00676364	NA	5.89479	0.154666	0.005
YBR036C	CSG2	4.84104	0.282873	NA	4.9337	0.177723	NA	5.50975	-0.019047	NA	5.43753	0.00522208	NA	5.39969	0.0726577	NA	5.6064	0.0761315	NA	5.2697	0.169777	NA
YBR039W	ATP3	8.66122	0.0929429	0.047	8.86763	0.0380029	0.024	8.26168	0.00252608	NA	8.45813	0.127367	0.088	8.38868	0.0477318	0.033	8.36075	0.00232571	NA	8.33835	0.00962775	NA
YBR041W	FAT1	6.63384	0.0271412	NA	6.70557	0.050061	0.007	6.17461	0.0363362	NA	6.43075	0.0401559	NA	6.48935	0.0448426	0.004	6.40145	0.00906112	NA	6.06193	0.0743521	0.015
YBR042C	CST26	7.05703	0.0737553	0.019	7.06795	0.0342791	0.009	6.61152	0.0143007	NA	6.81276	0.0184845	NA	6.62403	0.105957	0.069	6.9691	-0.0051233	NA	7.28337	0.0206026	NA
YBR043C	QDR3	6.39173	0.0972072	NA	6.67564	0.100738	0.007	6.95524	-0.0240579	NA	6.79632	-0.0487641	NA	6.62996	0.0739241	0.014	6.69141	-0.0620975	-0.007	6.42973	0.0295255	NA
YBR046C	ZTA1	3.67497	-0.094589	NA	4.55092	0.133793	NA	4.74821	-0.014518	NA	5.62243	-0.222575	-0.092	4.68193	0.385483	0.222	5.11052	-0.00840905	NA	4.42868	0.11355	NA
YBR048W	RPS11B	8.57438	-0.0465201	NA	8.62978	0.00413698	NA	8.84426	0.00373979	NA	8.92958	-0.000198602	NA	8.85629	0.00274794	NA	8.88475	0.0129657	NA	8.5284	-0.0202425	NA
YBR049C	REB1	5.08382	0.0581629	NA	5.76022	-0.0278232	NA	5.89037	0.0158642	NA	5.85142	-0.0464691	NA	5.79704	0.00518474	NA	5.69984	0.000552705	NA	4.5173	-0.0952887	NA
YBR052C	RFS1	7.4277	0.28001	0.134	7.85353	0.316417	0.226	8.90433	0.0170914	NA	8.4001	0.27298	0.199	8.76164	0.145192	0.112	8.50203	0.129891	0.094	8.2773	0.078234	0.026
YBR053C		6.4583	0.59486	0.387	6.72886	0.35493	0.237	7.07677	0.0578372	NA	7.14552	0.45351	0.334	7.03915	0.223265	0.153	7.19139	0.313537	0.209	7.34593	0.214384	0.107
YBR054W	YRO2	8.10052	0.0781978	0.034	8.27348	0.0634012	0.028	8.0662	0.0148424	NA	8.62833	-0.215023	-0.132	8.05023	0.0272111	NA	8.47645	0.0117486	NA	7.56819	0.0212089	NA
YBR055C	PRP6	6.61299	0.111155	0.012	6.85786	0.0802832	0.036	6.95701	0.00692412	NA	6.89403	0.0501238	0.02	6.89729	0.0442514	0.023	6.71275	0.044353	0.017	6.61101	0.04894	NA
YBR056W		5.80838	0.235786	0.047	5.98688	0.160679	0.045	5.97575	0.0353213	NA	5.52581	0.225575	0.084	6.01494	0.117339	0.039	6.11898	0.044012	NA	5.84211	-0.00961596	NA
YBR057C	MUM2	4.96057	0.285664	0.047	5.34505	0.236931	0.104	5.22045	0.0551561	NA	5.46429	0.0711048	NA	5.16669	0.230046	0.126	5.42198	0.0797886	0.006	4.89871	0.117893	NA
YBR058C	UBP14	6.32892	0.0233272	NA	6.16244	0.000926937	NA	5.65765	0.00708695	NA	5.42494	-0.0175991	NA	5.61845	0.00813427	NA	6.00294	0.0163259	NA	6.23104	0.0200326	NA
YBR061C	TRM7	4.54021	0.26732	0.088	5.00751	0.0803612	NA	5.06704	-0.0251278	NA	5.14284	-0.0757853	NA	4.94465	0.162198	0.056	4.99626	0.100997	NA	4.47656	0.167209	NA
YBR063C		5.39751	-0.133513	NA	6.03433	-0.0897876	NA	6.23361	0.0440539	NA	5.4212	-0.0900497	NA	6.04928	0.115186	0.027	5.88273	-0.0500259	NA	5.65906	-0.123218	NA
YBR065C	ECM2	0.868745	-0.0352458	NA	2.68718	-0.100243	NA	2.27114	-0.0864187	NA	3.15715	-0.31273	-0.072	1.38048	-0.0892514	NA	2.28085	-0.258757	NA	1.93816	-0.218225	NA
YBR067C	TIP1	8.49162	0.012153	NA	8.17058	0.00812775	NA	8.43941	0.00154466	NA	9.33209	0.00648292	0.002	8.62554	0.00649082	0.002	8.66458	0.00237588	NA	8.02497	0.00913947	NA
YBR069C	TAT1	5.12573	0.0457543	NA	5.65692	0.117691	0.021	6.42248	0.01364	NA	6.42916	0.00365681	NA	6.10184	0.0337036	NA	6.51702	0.0120741	NA	5.72049	0.0508447	NA
YBR070C	ALG14	5.14729	0.0103516	NA	5.20772	0.0332335	NA	5.73694	0.00751887	NA	5.50155	0.175411	0.082	5.52065	0.079675	0.026	6.19282	0.0123142	NA	5.43177	0.0409669	NA
YBR074W	PFF1	5.57562	0.287592	0.092	5.44577	0.377665	0.226	5.44902	0.0217103	NA	5.31667	0.077712	NA	5.35541	0.285137	0.161	5.336	-0.0169145	NA	4.81713	0.234479	NA
YBR076C-A		4.53181	-0.158656	NA	5.05948	-0.0584981	NA	5.59205	0.00739203	NA	5.32857	-0.162201	-0.03	5.55432	-0.00606268	NA	5.31883	-0.103639	NA	5.21833	-0.025532	NA
YBR078W	ECM33	8.34568	0.0918873	NA	8.63232	0.177835	0.089	9.3943	0.00200069	NA	9.2792	-0.380888	-0.27	9.26387	0.11135	0.054	9.35649	-0.0612562	NA	8.51578	-0.0645641	NA
YBR079C	RPG1	8.59469	0.537637	0.424	8.67902	0.218125	0.157	8.7768	0.0304195	NA	8.61589	0.20245	0.143	8.69093	0.132454	0.1	8.91775	0.0139268	NA	8.70458	0.0194671	NA
YBR080C	SEC18	4.4452	-0.0616911	NA	4.86055	0.0263239	NA	5.43282	0.00303023	NA	5.57495	0.0155043	NA	5.38133	0.102569	0.032	5.4415	0.0495163	NA	4.47018	0.150253	NA
YBR081C	SPT7	4.83478	0.42304	0.182	4.90595	0.333375	0.164	4.42664	0.123626	NA	4.73429	0.0292608	NA	4.78674	0.301908	0.16	4.65872	0.0888649	NA	4.00762	0.248873	NA
YBR083W	TEC1	6.97218	0.391981	0.233	7.03899	0.460612	0.339	6.82091	0.0859307	NA	7.08613	0.311809	0.196	7.05199	0.24985	0.166	6.77464	0.282354	0.171	6.65898	0.094265	NA
YBR084C-A	RPL19A	10.1575	0.0409413	0.021	10.0157	0.00872329	0.003	10.5551	0.000193927	NA	10.0827	0.0407401	0.028	10.2419	0.00978124	0.006	9.95115	0.000263216	NA	10.1262	0.000826106	NA
YBR084W	MIS1	7.11757	0.732808	0.584	7.16411	0.686457	0.566	7.95314	-0.0560518	NA	7.6171	0.190334	0.082	7.73605	0.127427	0.058	7.57889	0.197903	0.109	7.35281	0.329987	0.156
YBR085C-A		10.319	0.00622192	NA	10.0283	0.0192898	0.003	8.82261	0.00949686	NA	8.75821	0.0125108	NA	9.06999	0.0171355	0.004	9.44462	0.0127337	NA	9.25809	-0.00904773	NA
YBR085W	AAC3	2.29011	-0.12019	NA	2.34915	0.565236	0.221	3.06298	0.0158533	NA	2.488	0.277124	NA	2.62423	0.430231	0.164	2.31891	0.373677	0.069	2.93918	0.100273	NA
YBR088C	POL30	7.24898	0.0749729	0.022	7.22499	0.150791	0.095	6.958	0.0236633	NA	7.66599	0.0556916	0.032	6.96231	0.0838739	0.054	7.50504	0.0120833	NA	7.35948	0.0294383	NA
YBR089C-A	NHP6B	6.86268	0.657327	0.495	7.02934	0.652121	0.537	7.02245	0.095318	0.012	7.03546	0.257841	0.167	7.22945	0.265786	0.197	7.01216	0.135391	0.076	6.44938	0.247981	0.081
YBR092C	PHO3	7.54777	0.128105	NA	7.3623	0.177235	0.06	8.67581	0.02104	NA	8.55188	-0.100217	NA	9.08848	0.322709	0.231	8.41159	0.245006	0.157	7.70499	0.156251	0.016
YBR093C	PHO5	4.96398	0.38618	0.125	5.27257	0.279092	0.142	5.32264	0.0756207	0	4.70935	0.189783	0.05	6.15913	0.176517	0.125	5.05906	0.0564865	NA	4.91542	0.221647	NA
YBR096W		6.68258	0.0546702	0.004	6.96931	0.0190581	NA	6.80283	0.00139313	NA	6.95743	0.0100944	NA	6.85404	0.0623699	0.036	7.13177	0.0244024	0.007	6.39469	0.0256892	NA
YBR097W	VPS15	4.70478	0.118733	NA	5.20242	0.0749248	NA	5.28402	0.036046	NA	4.87306	0.0018014	NA	5.41952	0.204539	0.095	5.1178	0.21497	0.072	4.91129	0.171716	NA
YBR098W	MMS4	3.77998	-0.0668113	NA	4.08304	-0.0362128	NA	3.7254	0.0519877	NA	4.11534	-0.0907238	NA	3.8716	0.155616	NA	4.29056	0.0302153	NA	3.32597	0.110568	NA
YBR099C		2.17829	0.643978	0.29	1.98309	0.633594	0.363	NA	NA	NA	1.9696	0.473997	0.207	1.52721	0.229436	0.022	NA	NA	NA	1.00226	0.5012	0.033
YBR101C	FES1	7.33204	-0.0106358	NA	7.88672	-0.0153445	NA	7.34529	0.00706653	NA	6.87581	0.245195	0.138	7.55825	0.100271	0.055	7.53127	0.0390182	NA	7.2403	0.0798836	NA
YBR102C	EXO84	3.68674	0.184007	NA	4.93739	0.147285	NA	5.30488	0.0686196	NA	4.96504	0.239164	0.079	5.08152	0.109874	0.006	5.41168	0.228365	0.098	4.84403	0.0922739	NA
YBR103W	SIF2	5.6757	0.514645	0.296	6.20754	0.373087	0.254	5.79498	0.0450746	NA	5.93955	0.223182	0.123	5.89104	0.219346	0.137	5.87457	0.0503331	NA	5.56864	0.268135	0.073
YBR104W	YMC2	5.29352	0.0747587	NA	5.72865	0.0304256	NA	6.35236	-0.00153757	NA	6.01421	0.0684702	0.014	6.02929	0.0266282	NA	6.14713	0.0418532	NA	5.79819	0.0507226	NA
YBR105C	VID24	5.82902	0.129742	NA	6.9003	0.114836	0.04	6.05935	0.0427985	NA	6.50516	0.00646018	NA	6.05749	0.110535	0.043	6.46692	0.0682275	0.007	5.95184	0.245145	0.06
YBR106W	PHO88	9.77798	0.0320212	NA	10.0888	0.0381156	0.017	10.7156	-0.00445055	NA	10.5488	0.0903857	0.059	10.4781	0.06778	0.048	10.4473	0.0131149	0.002	9.77455	0.0751362	0.033
YBR108W	AIM3	5.62251	0.180744	NA	6.06462	0.0948851	0.021	6.02768	-0.00158345	NA	5.867	0.0619526	NA	6.16796	0.0919791	0.042	6.28314	0.0796165	0.024	5.92056	0.010676	NA
YBR109C	CMD1	9.57368	0.137739	0.092	9.21074	0.129613	0.089	9.59178	0.00913643	NA	9.25136	0.0821184	0.055	9.66953	0.0422352	0.031	9.60985	0.0280292	0.018	9.4257	0.0163717	NA
YBR111C	YSA1	7.32014	0.0620393	NA	7.19591	0.0919064	0.036	7.7709	0.0161199	NA	6.54726	0.172105	0.079	7.73902	0.0963283	0.063	7.68266	0.116456	0.073	7.0207	0.0274394	NA
YBR111W-A	SUS1	5.8622	0.404175	0.228	5.9021	0.21746	0.121	5.49043	0.0143082	NA	5.5792	0.406638	0.267	5.43988	0.0829956	0.028	5.8358	0.0156066	NA	5.76781	0.0225883	NA
YBR112C	CYC8	5.03679	0.440199	0.154	5.2376	0.217523	0.057	5.06598	0.0470429	NA	5.02967	0.528334	0.34	5.0686	0.363323	0.212	5.30391	0.136897	0.015	5.37718	-0.0953547	NA
YBR114W	RAD16	3.86205	0.352394	NA	5.17035	-0.0995414	NA	5.15147	0.0869657	NA	5.0285	-0.0620525	NA	5.03211	0.3026	0.163	4.87389	-0.0147075	NA	4.74736	0.264334	NA
YBR115C	LYS2	6.69266	0.190011	0.066	6.62935	0.0943981	NA	6.96079	-0.0114709	NA	6.90227	0.133506	0.042	7.0594	0.150013	0.082	7.1122	0.152862	0.073	6.43161	0.0910433	NA
YBR118W	TEF2	13.0844	0.0265261	0.018	12.6418	0.0416986	0.031	13.1257	0.00269236	0	13.3503	0.00263881	0.001	13.1897	0.0178789	0.014	12.9851	0.00338959	0.002	13.0868	0.00429255	0.002
YBR119W	MUD1	7.13171	0.0189345	NA	6.86232	0.0357149	NA	5.15422	0.0145919	NA	5.59505	-0.121558	-0.028	5.42152	0.0409111	NA	4.88677	0.0363483	NA	4.60987	-0.0267336	NA
YBR120C	CBP6	4.79561	-0.00262557	NA	5.2949	-0.00899995	NA	5.24572	0.00105235	NA	5.03672	0.000494776	NA	5.21646	0.00420661	NA	5.44285	0.0109073	NA	4.97698	-0.00901215	NA
YBR121C	GRS1	8.47635	0.423395	0.301	8.30396	0.397277	0.292	8.69531	0.00695716	NA	8.55461	0.203947	0.121	8.42278	0.385115	0.294	8.54648	0.213631	0.145	8.36765	0.196934	0.094
YBR125C	PTC4	5.66972	0.331796	0.121	5.60013	0.261501	0.112	5.66806	-0.0272192	NA	5.52254	0.210606	0.069	5.73788	0.21986	0.116	5.85784	0.0308795	NA	5.15685	0.120461	NA
YBR126C	TPS1	8.36961	0.13	0.079	8.42648	0.0921335	0.064	8.14243	0.0182646	0.003	8.76326	0.0269205	0.017	8.41203	0.0740789	0.057	8.55604	0.0574674	0.042	8.82914	0.00667235	NA
YBR127C	VMA2	9.37363	0.0490167	NA	8.83968	-0.0241208	NA	9.1452	-0.0228762	NA	9.37585	-0.076785	NA	9.23156	0.0743592	0.021	9.08886	0.102435	0.044	9.40296	0.0245056	NA
YBR131W	CCZ1	4.73417	0.163907	NA	5.06595	0.107904	NA	5.01718	-0.000994268	NA	4.94427	0.117293	NA	4.6832	0.0911846	NA	4.84847	0.131996	0.021	4.60434	0.087768	NA
YBR132C	AGP2	6.5348	0.0343843	NA	6.46714	0.026715	0.004	5.45545	0.00991006	NA	5.88467	0.0200068	NA	5.79244	0.0808458	0.042	6.06991	0.012438	NA	6.30059	0.00737138	NA
YBR133C	HSL7	5.48428	0.395381	0.139	6.19709	0.412066	0.255	6.75175	0.0960018	NA	6.37625	0.336687	0.197	6.82473	0.390718	0.281	6.59166	0.216595	0.112	6.14911	0.344135	0.129
YBR135W	CKS1	6.52623	0.115097	NA	6.78483	0.0693439	NA	7.12348	0.0417216	NA	6.82266	0.122075	0.041	6.98378	0.0372057	NA	7.14164	0.131975	0.065	6.68269	-0.145128	NA
YBR137W		5.80734	0.0626075	NA	6.01674	0.0992708	NA	6.83201	0.0224927	NA	6.15024	0.16814	0.041	6.58179	0.0961947	0.017	6.75569	0.0168858	NA	5.9852	0.20403	NA
YBR139W		5.99745	0.0490748	NA	6.31719	0.172883	0.067	6.91481	-0.0306651	NA	6.93378	-0.144861	-0.043	6.82074	0.120889	0.049	7.02017	0.103624	0.032	6.07825	0.0864731	NA
YBR143C	SUP45	8.98757	0.131159	0.073	9.06024	0.12763	0.074	9.00975	0.0408543	NA	9.13633	0.0965988	0.04	9.13017	0.146328	0.105	8.83879	0.0482764	0.006	8.70579	0.0935081	0.022
YBR145W	ADH5	4.55297	0.791594	0.569	4.34825	0.64934	0.466	4.11549	0.311149	0.085	4.22768	0.2598	0.1	4.03693	0.465947	0.279	4.75443	0.345731	0.194	4.60642	0.279965	0.069
YBR146W	MRPS9	5.35551	0.0656648	NA	5.85932	0.0759164	NA	6.0542	-0.0222463	NA	5.7597	0.0641222	NA	5.98285	0.0625731	0.019	6.11544	0.00386102	NA	5.65783	0.0513708	NA
YBR149W	ARA1	7.4501	0.155899	0.032	7.30263	0.162049	0.059	7.58048	0.050049	NA	7.64214	0.378476	0.258	7.834	0.325566	0.232	7.88059	0.127509	0.056	7.3013	0.183442	0.042
YBR150C	TBS1	5.50093	0.0701825	NA	6.02758	0.0353175	0.005	NA	NA	NA	5.16063	0.142343	0.058	5.21884	0.0690615	0.025	NA	NA	NA	NA	NA	NA
YBR151W	APD1	6.64527	0.0927494	NA	6.89394	0.122653	0.063	6.4284	-0.00167688	NA	6.57386	0.12266	0.06	6.55841	0.103936	0.061	6.71579	0.0732122	0.031	6.39218	0.012142	NA
YBR153W	RIB7	4.80342	0.359057	0.1	5.24644	0.538643	0.38	5.13556	-0.0765444	NA	5.3418	0.0218017	NA	4.98227	0.0772934	NA	5.00652	0.191776	0.045	4.96236	0.065974	NA
YBR155W	CNS1	5.25935	0.131185	NA	5.89977	0.111832	NA	6.55817	0.0253159	NA	6.08826	0.0981734	NA	6.30269	0.02657	NA	6.31003	0.119839	0.038	5.86319	0.0455938	NA
YBR156C	SLI15	4.18471	-0.0163353	NA	4.77727	0.0538698	NA	4.56304	0.0491772	NA	4.91226	0.122117	0.027	4.56477	0.0734586	NA	4.71919	0.0551035	NA	3.80148	0.139879	NA
YBR160W	CDC28	6.61581	0.0909934	NA	6.9732	0.0954475	0.017	7.39038	-0.0260756	NA	7.53341	-0.0355404	NA	7.25918	0.00307229	NA	7.48471	0.0200624	NA	7.11693	0.0126187	NA
YBR161W	CSH1	5.44607	0.220638	0.027	5.37713	0.452875	0.293	5.3368	0.0063942	NA	5.2959	0.155166	0.042	5.31747	0.202186	0.104	5.49432	0.135859	0.04	4.27121	0.149019	NA
YBR162C	TOS1	7.04645	-0.288518	-0.14	7.05643	-0.0706631	NA	7.42721	-0.0326977	NA	7.62378	-0.0884249	-0.028	7.4476	0.00708164	NA	7.39782	-0.0222062	NA	6.98412	-0.440751	-0.259
YBR162W-A	YSY6	6.47311	0.0833208	NA	6.59934	0.016742	NA	7.32047	0.00691007	NA	6.22858	0.0645108	0.007	6.92034	0.0218285	NA	6.88909	-0.00609567	NA	6.47086	0.11896	0.007
YBR163W	EXO5	6.07976	0.190142	NA	6.57534	0.18076	0.066	6.71711	-0.0552347	NA	6.54959	0.253222	0.134	6.5983	0.0607674	NA	6.37637	-0.00756239	NA	6.1524	0.00927675	NA
YBR164C	ARL1	6.19406	0.151279	NA	6.30297	0.292909	0.147	7.08414	0.0384209	NA	6.78661	0.191044	0.077	6.92562	0.138284	0.063	6.83866	0.205639	0.104	6.19996	0.285923	0.069
YBR165W	UBS1	4.38762	0.00495083	NA	4.54727	0.0549429	NA	4.0368	-0.0947267	NA	4.24759	-0.0325212	NA	4.19435	-0.0372639	NA	4.22682	-0.0290391	NA	4.10476	-0.0545076	NA
YBR166C	TYR1	5.94334	0.0892596	NA	6.05135	0.0861126	0.022	5.88544	0.0141397	NA	5.6323	-0.0757824	NA	5.88626	0.067267	0.014	6.06984	0.00994927	NA	5.68628	0.0735634	NA
YBR168W	PEX32	4.98867	0.261114	0.064	5.32318	0.297278	0.175	4.96767	0.0206928	NA	5.37224	0.102363	NA	5.17309	0.279602	0.165	4.96735	0.110508	NA	4.80985	0.293867	0.107
YBR169C	SSE2	7.38018	0.0349628	0.005	7.50787	0.00311857	NA	6.26171	0.000176926	NA	6.49922	0.11915	0.067	6.65032	0.109737	0.075	6.67862	0.000193524	NA	6.57299	0.0201687	NA
YBR170C	NPL4	4.95014	0.0956021	NA	5.96067	0.279556	0.144	5.80221	-0.0203923	NA	6.3985	-0.037583	NA	5.71267	0.175243	0.073	6.15391	0.0733383	NA	5.96598	0.0854209	NA
YBR171W	SEC66	7.23406	0.111987	0.001	7.12201	0.167831	0.09	7.08874	0.0239054	NA	7.16859	0.128837	0.051	7.07496	0.0827883	0.024	7.34139	0.0829762	0.021	7.02584	0.0962456	NA
YBR173C	UMP1	7.32907	0.043322	NA	7.86912	0.0330287	NA	7.76748	-0.014687	NA	7.95715	0.0508746	0.023	7.7609	0.017242	NA	7.90984	0.0491296	0.024	7.80723	0.00153026	NA
YBR176W	ECM31	5.14483	0.0250515	NA	5.18104	0.012753	NA	5.54574	-0.00676263	NA	5.18749	0.0155113	NA	5.33815	0.0569366	0.006	5.50353	0.0335722	NA	4.9084	0.0906462	NA
YBR177C	EHT1	7.32079	-0.0117886	NA	7.43912	-0.0218837	NA	7.26398	0.00790607	NA	6.90682	0.0364655	NA	7.29257	0.0525885	0.023	7.35307	-0.0181585	NA	6.63663	0.0233608	NA
YBR181C	RPS6B	8.60312	0.144464	0.079	8.59214	0.0724605	0.042	8.97049	-0.00115764	NA	8.97995	0.0241295	0.013	8.8257	0.0508725	0.036	8.90054	0.00597849	NA	8.56311	0.005834	NA
YBR183W	YPC1	5.73505	0.441763	0.254	5.87756	0.397189	0.265	5.19219	-0.0562981	NA	5.46775	-0.0579463	NA	5.15836	0.213223	0.1	5.152	0.0444533	NA	5.0315	-0.0583348	NA
YBR185C	MBA1	6.20906	0.118086	NA	6.37045	0.233822	0.119	6.17026	0.0287902	NA	6.10549	0.292141	0.163	6.25462	0.217599	0.131	6.45305	0.119074	0.041	5.99781	0.159899	NA
YBR187W	GDT1	5.684	0.23065	NA	5.84912	0.126323	0.024	6.86266	0.0130205	NA	6.50392	0.0657064	NA	6.6652	0.140601	0.084	6.62575	0.0747943	0.021	6.00157	0.195551	NA
YBR188C	NTC20	4.49089	-0.0057075	NA	4.89137	0.0903541	NA	6.18623	-0.0019086	NA	5.57914	0.0512425	NA	5.86717	0.0144922	NA	5.64656	-0.00648111	NA	5.04594	-0.0730138	NA
YBR189W	RPS9B	12.0084	0.0747966	0.054	12.1557	0.0143116	0.01	12.6096	0.000520485	NA	12.5773	0.0280931	0.02	12.5471	0.0383605	0.03	12.3025	0.000580302	NA	11.8936	0.00906661	0.003
YBR191W-A		9.01656	0.0515491	0.008	8.89318	0.0482955	0.021	9.39552	0.00251504	NA	9.29088	0.0374827	0.016	9.32771	0.0708783	0.05	9.22801	-0.0026812	NA	8.73646	0.0170521	NA
YBR192W	RIM2	5.02513	0.192162	0.085	5.48855	0.149735	0.061	5.40741	0.0255118	NA	4.95656	-0.110372	NA	5.47562	0.0465859	NA	5.47362	0.0700722	NA	5.04429	0.0710077	NA
YBR193C	MED8	3.34103	0.0255785	NA	4.02855	0.116422	NA	4.18188	0.0274745	NA	4.28663	0.0744716	NA	4.08598	0.0548246	NA	4.42863	0.0220279	NA	3.89251	0.0390849	NA
YBR194W	AIM4	3.21865	0.702853	0.27	4.56892	0.159429	0.019	5.01739	-0.0042976	NA	4.4795	0.0206783	NA	4.73888	0.00491345	NA	4.47573	0.0791429	NA	3.89897	0.169179	NA
YBR198C	TAF5	5.11118	0.0154392	NA	5.90289	0.0591295	NA	6.37869	-0.00598624	NA	5.93161	0.103404	0.029	6.23695	0.106305	0.054	6.37644	0.0187658	NA	5.73149	0.106811	NA
YBR199W	KTR4	6.98666	0.484762	0.316	7.30802	0.342323	0.24	7.57812	0.0311939	NA	7.58366	0.171574	0.104	7.56747	0.21131	0.153	7.3567	0.144027	0.089	7.16102	0.156229	0.05
YBR200W	BEM1	6.57077	0.0529788	NA	6.52299	0.0651351	0.025	5.8566	-0.00813366	NA	6.08983	0.00542845	NA	5.99073	0.0421155	0.012	6.0017	-0.00597693	NA	5.74912	0.00304503	NA
YBR201W	DER1	4.67451	0.288961	NA	5.22014	0.0724849	NA	6.09232	0.0258686	NA	5.38496	0.167754	0.053	5.66538	0.180395	0.099	6.13473	0.109546	0.04	5.04779	0.139528	NA
YBR203W	COS111	4.95069	0.150111	0.057	5.19516	0.112213	0.037	4.37687	0.0274908	NA	4.28788	-0.293436	-0.104	4.46552	0.0877109	0.012	4.73093	0.03513	NA	4.4515	0.0826904	NA
YBR206W		6.86644	0.0533168	NA	6.96004	0.0607881	NA	8.23954	-0.0122057	NA	7.61559	-0.000297176	NA	7.98631	0.0564702	0.02	7.86377	0.0507944	0.009	7.44357	-0.00939874	NA
YBR210W	ERV15	4.50004	-0.129971	NA	4.80637	0.0235923	NA	4.75276	0.0338786	NA	4.76598	-0.000317503	NA	4.69739	0.0351675	NA	4.71936	0.0376234	NA	4.51986	-0.0421857	NA
YBR212W	NGR1	6.61059	-0.0180909	NA	6.53356	0.0153069	NA	5.74329	-0.0182436	NA	5.99798	-0.312655	-0.188	6.01743	0.0354823	NA	6.0551	-0.065201	NA	5.95835	0.0371746	NA
YBR213W	MET8	4.35396	0.312	0.115	4.78619	0.316934	0.173	4.72513	-0.0657409	NA	5.24557	-0.0242855	NA	4.20069	0.235938	0.087	4.90645	0.200174	0.06	4.40592	0.193528	NA
YBR215W	HPC2	4.57483	0.135072	NA	4.77853	0.108177	NA	5.60606	0.045939	NA	5.51865	0.191034	0.058	5.60193	0.115817	0.027	5.67272	0.139772	0.033	5.00392	0.186394	NA
YBR216C	YBP1	3.79822	0.570711	0.258	4.55108	0.138313	NA	5.13605	0.000115087	NA	5.33641	0.00729344	NA	4.98501	0.0748808	NA	4.93625	0.0516203	NA	4.57142	-0.0142035	NA
YBR218C	PYC2	7.24996	0.18317	0.095	7.45552	0.0974688	0.054	7.48631	-0.000567763	NA	7.25127	0.0514663	NA	7.48213	0.0580062	0.034	7.22291	-0.000806443	NA	6.922	0.0354048	NA
YBR220C		5.09412	0.263006	NA	5.41025	0.2408	0.074	6.06227	0.000683899	NA	5.95392	0.17451	0.048	5.89444	0.14006	0.048	6.22022	0.0145118	NA	5.50809	0.182404	NA
YBR221C	PDB1	8.70553	0.0485055	0.023	8.52323	0.0414905	0.02	8.23118	-0.00235403	NA	8.29354	-0.0106505	NA	8.40124	0.0215063	0.003	8.3913	0.0369048	0.018	8.22976	0.031218	NA
YBR225W		3.05686	0.635994	0.28	3.7901	0.35412	0.134	3.59089	0.136397	NA	3.57338	0.405218	0.176	3.75994	0.234388	0.083	3.6262	0.326228	0.111	3.39419	0.199436	NA
YBR229C	ROT2	5.29261	7.58735e-05	NA	5.88168	-0.000891956	NA	6.67394	-0.0107804	NA	6.39875	0.00402979	NA	6.35313	0.000230761	NA	6.32144	0.0179461	NA	5.72422	0.0339444	NA
YBR230C	OM14	8.70634	0.535176	0.423	8.85433	0.520826	0.419	8.13089	0.0277218	NA	8.26955	0.297298	0.18	8.28319	0.259105	0.174	8.34483	0.340218	0.236	7.95804	0.238072	0.098
YBR230W-A		7.02035	-0.17108	-0.019	6.54033	-0.255129	-0.119	7.25904	-0.0452298	NA	6.38055	-0.141882	-0.015	7.22738	-0.062841	NA	6.49468	0.0999144	0.007	7.03116	-0.288035	-0.123
YBR231C	SWC5	6.20324	0.0870987	NA	6.91139	-0.00457414	NA	6.78507	0.00242816	NA	7.10136	0.02216	NA	6.64214	0.0914724	0.048	6.70555	-0.0111539	NA	6.72781	0.00198486	NA
YBR233W	PBP2	5.67197	0.0163016	NA	5.93218	0.00618971	NA	5.39028	-0.0170002	NA	5.90713	-0.00568543	NA	5.53556	0.0109364	NA	5.68052	-0.0114554	NA	5.44288	0.00429822	NA
YBR233W-A	DAD3	4.44373	-0.0615439	NA	4.32763	-0.0853883	NA	5.26979	-0.0146519	NA	5.15587	0.0123743	NA	5.22151	0.142486	0.047	5.03468	0.0804483	NA	5.10029	-0.0334155	NA
YBR234C	ARC40	8.19927	0.0279474	0.004	8.08496	0.0195972	0.006	7.91719	0.00129822	NA	8.4823	0.0214093	0.011	7.98356	0.0126843	0.005	8.31809	0.010696	0.004	8.22508	0.00102932	NA
YBR235W	VHC1	5.22188	0.01131	NA	5.83202	-0.00804066	NA	6.01316	-0.00143868	NA	5.76059	0.0171537	NA	5.93715	0.0285063	NA	5.85664	0.015636	NA	5.41804	0.0723824	NA
YBR236C	ABD1	4.39751	-0.076566	-0.012	5.42508	0.0291884	NA	5.38473	-0.0333498	NA	5.29671	0.0533084	NA	5.35432	0.0585185	NA	5.41715	0.0491533	NA	4.7707	0.0243457	NA
YBR239C	ERT1	4.44679	0.0386486	NA	5.24026	0.00588256	NA	5.63025	0.0185544	NA	5.11107	0.145962	0.033	5.19819	0.0177967	NA	5.31489	0.0266872	NA	4.43773	-0.0153713	NA
YBR240C	THI2	3.46725	-0.113952	NA	3.29975	-0.0122639	NA	3.01224	-0.14519	NA	3.13997	-0.22452	-0.08	3.05119	-0.174871	-0.036	3.17574	-0.186735	-0.019	3.77675	-0.225415	-0.048
YBR241C		5.06066	-0.0598911	-0.014	5.63573	0.0994298	NA	6.20205	0.00803929	NA	6.42098	-0.0467308	-0.013	6.28525	0.0679668	0.022	6.23504	-0.0736761	-0.039	6.05794	-0.0250072	NA
YBR242W		4.54962	0.39379	0.072	5.11423	0.223768	0.072	5.69087	0.0108564	NA	5.16908	0.15863	0.037	5.52355	0.332235	0.214	5.51614	0.210176	0.095	4.87869	0.234953	NA
YBR243C	ALG7	5.30261	0.107116	NA	5.7586	0.10512	NA	6.77473	-0.00391785	NA	6.053	0.232843	0.09	6.69243	0.216829	0.129	6.61319	0.0863598	NA	5.96242	0.157275	NA
YBR244W	GPX2	6.43399	0.0634089	NA	6.49471	0.0342076	0.003	6.5678	0.00368064	NA	7.42408	0.0412694	0.022	6.58132	0.0360062	0.016	6.47686	0.0191943	NA	6.80161	7.80866e-05	NA
YBR245C	ISW1	5.59252	0.136386	NA	6.15028	0.0164645	NA	6.39884	-0.00108402	NA	6.39257	0.030886	NA	6.2957	0.0485699	0.012	6.30573	0.0412466	NA	5.77353	0.0300996	NA
YBR247C	ENP1	6.21029	0.0888084	NA	6.06798	0.109424	0.014	6.06815	0.0283255	NA	6.01625	0.246813	0.128	6.04465	0.281607	0.182	6.00642	0.039462	NA	5.72749	0.218293	0.032
YBR248C	HIS7	7.40357	0.202649	0.09	7.69223	0.15574	0.086	7.77994	0.0228341	NA	8.04287	0.346179	0.245	7.91314	0.226621	0.165	8.04395	0.0978733	0.054	7.6977	0.0646565	NA
YBR249C	ARO4	7.90759	0.139078	NA	7.85254	0.227282	0.136	8.68975	-0.0329903	NA	8.19959	0.096504	0.01	8.58427	0.243999	0.18	8.47198	0.130533	0.072	7.97309	0.173698	0.052
YBR255W	MTC4	3.48534	-0.0475592	NA	4.31491	0.0131617	NA	4.2984	0.0270991	NA	4.22295	-0.164101	NA	4.24937	0.047908	NA	4.38127	0.0989143	NA	3.85938	-0.0894242	NA
YBR256C	RIB5	7.53319	0.0403863	NA	7.84195	0.0243204	0.006	7.68265	-0.00024775	NA	7.69428	0.00666633	NA	7.76394	0.00782386	NA	7.84357	0.000485534	NA	7.54478	0.00146189	NA
YBR257W	POP4	4.09745	0.397021	0.144	4.51282	0.362482	0.17	4.74002	0.0228203	NA	4.53641	0.258966	0.075	4.64212	0.219907	0.086	4.73206	0.128142	NA	3.72134	0.293193	NA
YBR258C	SHG1	4.56633	0.453334	0.238	4.79226	0.20775	0.037	4.67152	0.0223172	NA	4.64376	0.103373	NA	4.44852	0.15545	0.015	4.72635	0.187495	0.017	4.04974	0.443689	0.18
YBR259W		4.10587	-0.0869772	NA	4.98193	-0.034906	NA	5.46411	0.0332861	NA	5.19542	0.0263056	NA	5.17873	0.115031	0.026	4.84288	-0.229915	-0.072	4.24647	0.165771	NA
YBR260C	RGD1	4.67196	0.101811	NA	4.75528	0.183344	0.047	4.54528	0.0124311	NA	4.28014	0.192957	0.036	4.62144	0.142056	0.044	4.71402	0.0299432	NA	4.6663	0.0183323	NA
YBR263W	SHM1	7.22064	0.0187427	NA	7.04863	0.00571738	NA	7.42129	-0.000331441	NA	6.88115	0.0373543	0.007	7.37118	0.0206452	0.006	7.10397	0.0168745	NA	7.50684	0.00474209	NA
YBR267W	REI1	6.18223	0.0155977	NA	6.45674	0.00703747	NA	6.32822	0.000176855	NA	NA	NA	NA	6.17569	0.00564616	NA	NA	NA	NA	6.08997	0.0186342	NA
YBR269C	SDH8	5.21266	0.0369638	NA	5.7764	0.00389172	NA	5.43186	-0.0088982	NA	6.03366	-0.0168764	NA	5.65193	0.00474927	NA	5.70712	-0.0176949	NA	5.46613	-0.0726643	NA
YBR270C	BIT2	4.24524	0.157982	NA	4.84755	0.109353	0.008	4.74366	0.008894	NA	4.87036	0.0317198	NA	4.51929	0.181051	0.079	4.41445	0.0401083	NA	4.53795	0.110072	NA
YBR272C	HSM3	5.66599	0.340443	0.168	5.90663	0.240158	0.14	5.33134	0.0614867	NA	5.24334	0.160942	0.063	5.40639	0.20821	0.125	5.57517	0.0402067	NA	5.34624	0.0373827	NA
YBR273C	UBX7	7.57564	0.0341363	NA	7.47947	0.0514916	0.023	6.54172	0.00120004	NA	6.77429	0.0318874	0.006	6.77627	0.0627773	0.034	6.92999	0.0015342	NA	6.71232	0.0355218	NA
YBR275C	RIF1	5.34624	0.210628	0.113	5.6779	0.161254	0.074	5.58959	0.00652777	NA	5.914	0.096217	0.01	5.61491	0.0956902	0.025	5.79771	0.0984158	0.019	5.67425	0.209078	0.105
YBR276C	PPS1	7.22324	0.273201	0.172	7.03286	0.221882	0.148	6.65969	0.0231018	NA	6.88627	0.0667115	0.033	6.73499	0.224455	0.165	6.97592	0.00998837	NA	7.02675	0.025629	NA
YBR278W	DPB3	4.73396	0.548493	0.258	5.45511	0.436843	0.276	5.4962	0.0285793	NA	6.49855	0.585418	0.452	5.22391	0.221113	0.112	5.28585	0.14745	0.04	5.05709	0.155556	NA
YBR279W	PAF1	6.56052	0.021443	NA	6.39298	-0.00410195	NA	6.31486	-0.00205205	NA	5.96311	0.182316	0.097	6.25919	0.0689572	0.032	6.45606	0.0473363	0.013	7.38905	-0.019763	NA
YBR281C	DUG2	5.61453	0.00305533	NA	5.76373	0.00923229	NA	5.52588	-0.0109805	NA	5.35098	-0.131952	-0.032	5.88727	0.0335125	NA	5.68652	-0.0287509	NA	5.30708	0.0387212	NA
YBR282W	MRPL27	9.27861	0.0549581	0.032	8.9864	0.0286222	0.017	8.66551	0.00180282	NA	8.59417	0.0414513	0.025	8.81259	0.0187356	0.012	8.93656	0.0070887	0.002	9.51996	0.000492959	NA
YBR286W	APE3	8.67461	0.0328235	NA	8.78584	0.0211783	0.007	9.15741	-0.00215548	NA	8.87837	0.0443004	0.026	9.17411	0.0257502	0.017	8.84068	0.0159845	0.006	8.81634	0.0110401	NA
YBR287W		5.01173	0.699305	0.477	5.7248	0.670454	0.54	5.12382	0.0906318	NA	5.30919	0.262682	0.1	5.37345	0.382103	0.243	5.33473	0.249356	0.107	4.91031	0.3837	0.13
YBR289W	SNF5	6.51736	0.505955	0.326	6.8838	0.313612	0.219	7.03875	0.0115051	NA	7.31373	0.0110615	NA	7.05775	0.0869515	0.058	6.87915	0.117044	0.072	6.97032	0.0838939	0.022
YBR291C	CTP1	5.50434	-0.0234354	NA	5.47884	0.0879207	NA	5.47427	-0.0241223	NA	4.93905	0.240122	0.072	5.5982	0.198529	0.095	5.65946	-0.0121671	NA	4.42403	-0.00148112	NA
YBR293W	VBA2	5.1473	0.677262	0.48	5.61538	0.339997	0.193	4.89648	0.0813339	NA	5.35398	0.0526997	NA	5.01535	0.31395	0.174	5.11211	-0.0199973	NA	5.02743	0.143538	NA
YBR295W	PCA1	4.54533	0.120695	0.038	5.07745	0.117266	0.052	4.85035	0.041748	NA	5.00758	0.0754281	NA	5.03724	0.102156	0.044	4.9754	0.0729719	NA	4.7941	0.110236	0.026
YBR299W	MAL32	1.82604	0.154483	NA	2.56203	0.0687133	NA	2.73191	-0.0195351	NA	2.83482	-0.0172162	NA	3.07819	-0.00306843	NA	3.12001	0.0724806	NA	2.48503	-0.044236	NA
YCL002C		4.95205	0.135458	NA	5.25831	0.0318255	NA	5.60761	-0.0112996	NA	5.33088	-0.0244589	NA	5.34179	-0.102823	NA	5.34349	0.0891602	NA	5.2818	-0.00971486	NA
YCL005W	LDB16	4.92336	0.164171	NA	5.23894	0.160318	NA	5.7176	0.0183658	NA	5.60402	0.0582497	NA	5.77328	0.130168	0.047	5.62494	0.0396683	NA	5.31578	0.185381	NA
YCL005W-A	VMA9	8.82935	0.0224442	NA	8.79321	0.00253475	NA	9.10011	0.00145775	NA	8.38554	0.00904483	NA	9.13067	0.00389752	0	8.88845	0.00278212	NA	8.56572	0.0112355	NA
YCL009C	ILV6	9.56473	0.235966	0.153	9.02644	0.189718	0.105	8.80194	0.0282164	NA	8.71484	-0.0413594	NA	8.69259	0.142958	0.079	9.08331	0.110593	0.049	9.1007	0.175902	0.073
YCL011C	GBP2	7.47877	0.23833	0.122	7.82524	0.234735	0.156	7.79149	0.0263396	NA	7.64144	0.212089	0.12	7.71711	0.29484	0.223	7.7062	0.126302	0.06	7.61259	0.18786	0.074
YCL012C		5.07635	0.020277	NA	5.45667	0.0259129	NA	5.14643	0.0224465	NA	5.45724	-0.0635289	NA	5.02608	0.00173012	NA	5.17639	0.00987324	NA	5.12747	-0.0108952	NA
YCL014W	BUD3	5.96538	0.348096	0.15	6.01251	0.286809	0.161	6.57978	0.0348701	NA	6.38116	0.217114	0.125	6.80503	0.212902	0.151	6.42044	0.0861176	0.034	6.0842	0.128316	NA
YCL017C	NFS1	6.04325	0.332212	0.192	6.03675	0.301649	0.185	6.19954	-0.053964	NA	7.50623	-0.379647	-0.259	6.31342	0.0521101	NA	6.31331	0.0849469	NA	5.98373	-0.00938864	NA
YCL018W	LEU2	6.11249	0.338643	0.152	6.57845	0.0874559	0.005	6.61405	0.0478483	NA	7.38205	0.204334	0.118	6.61004	0.228377	0.149	6.356	0.144318	0.064	6.16372	0.176759	0.024
YCL019W		3.3213	0.477607	0.163	2.49673	-0.0534327	NA	2.29175	0.0371043	NA	1.37842	-0.071201	NA	2.22256	0.174555	NA	2.14095	-0.0894204	NA	1.97663	-0.0175652	NA
YCL021W-A		6.72271	0.0572706	NA	5.73928	0.0550803	NA	5.35208	0.038484	NA	5.83104	-0.0683799	-0.002	6.30012	0.0605437	0.02	5.93962	0.0353714	NA	6.55833	0.0381208	NA
YCL025C	AGP1	8.12602	0.0184791	NA	8.10041	0.00615893	NA	7.72522	-0.000819446	NA	7.22346	0.0497042	0.021	7.87848	0.0186792	0.01	8.11313	0.000148603	NA	7.99352	0.00746459	NA
YCL026C-B	HBN1	6.21766	-0.00968245	NA	5.92451	-0.00593548	NA	6.41953	-0.00518138	NA	5.75485	0.0399148	NA	6.39177	0.0176975	NA	6.92116	0.00566596	NA	5.85702	0.0490499	NA
YCL028W	RNQ1	5.53444	0.115614	NA	5.82979	0.271179	0.134	6.67707	-0.00900534	NA	6.73368	0.0782083	0.022	6.42651	0.155397	0.092	6.80724	0.0851102	0.029	6.26441	0.081	NA
YCL029C	BIK1	5.13768	0.0230259	NA	5.23028	0.0278191	NA	4.67338	0.0160629	NA	4.90459	-0.0577659	NA	4.86798	0.066019	NA	5.10021	0.00935298	NA	4.66718	-0.0454012	NA
YCL030C	HIS4	6.36845	0.32199	0.194	6.46157	0.147158	0.085	6.09854	0.062654	0.008	5.96086	0.231199	0.142	6.04041	0.170935	0.116	6.08911	0.0796367	0.038	5.57976	0.0626794	NA
YCL032W	STE50	7.19481	0.101168	NA	7.08214	0.0879023	NA	6.93961	0.0439276	NA	6.81526	0.164314	0.057	7.10762	0.222064	0.139	6.96963	0.0251077	NA	6.63252	0.133887	NA
YCL033C	MXR2	7.05093	0.0340389	NA	6.97633	0.0852387	0.036	7.66937	0.00121377	NA	7.30405	0.108708	0.065	7.67648	0.0221113	0.011	7.62913	0.00640116	NA	8.00545	0.00287984	NA
YCL035C	GRX1	8.58025	0.0589927	0.03	7.89588	0.0658016	0.037	7.98436	0.0126939	NA	7.6852	0.127546	0.082	8.16711	0.0280618	0.018	8.13569	0.00286426	NA	8.30009	-0.000608632	NA
YCL036W	GFD2	5.09684	0.0443061	NA	5.02282	0.0102147	NA	5.30126	-0.0472581	NA	5.10912	0.0715401	NA	5.10597	0.14863	0.061	5.07444	-0.02991	NA	5.40844	-0.0671956	NA
YCL037C	SRO9	2.7119	-0.407997	NA	3.151	-0.0516732	NA	3.79194	0.0367682	NA	4.00388	-0.0913601	NA	3.445	-0.0484904	NA	4.03822	-0.0451102	NA	3.00629	-0.181953	NA
YCL043C	PDI1	11.2021	0.00175247	NA	11.2584	0.000986193	NA	11.7439	8.43256e-05	NA	11.7211	0.00101252	0	11.494	0.00155572	0	11.6346	0.000528063	0	NA	NA	NA
YCL047C	POF1	5.50814	0.0582434	NA	5.49854	-0.0291837	-0.001	6.41609	0.0239268	NA	5.97684	0.058948	NA	6.18028	0.0741496	0.032	6.25589	0.0209851	NA	5.38075	0.00375329	NA
YCL049C		5.31708	0.0854597	NA	5.62999	0.0681593	NA	5.30565	-0.0220977	NA	5.13168	0.00458212	NA	5.03079	0.174697	0.086	5.35473	-0.00535044	NA	5.07123	0.0065285	NA
YCL050C	APA1	6.85338	0.102816	0.029	6.37951	0.141862	0.069	6.37324	0.011131	NA	6.37898	0.203827	0.123	6.46431	0.130958	0.086	6.4666	0.019901	NA	6.26237	0.0588386	NA
YCL051W	LRE1	5.41381	0.262978	0.073	5.36694	0.267627	0.119	5.09138	-0.0536558	NA	4.96528	0.342131	0.162	5.01326	0.378607	0.229	5.31696	0.225674	0.101	4.79777	0.12031	NA
YCL055W	KAR4	5.6096	0.373865	0.17	5.82985	0.43905	0.296	4.9006	0.0802516	NA	5.61525	0.217331	0.08	5.02969	0.494783	0.335	5.32279	0.0484787	NA	5.41436	-0.055068	NA
YCL056C	PEX34	4.14179	0.0305915	NA	4.87609	-0.0202885	NA	4.89507	-0.0154359	NA	5.23066	0.0759528	NA	4.96483	0.123087	0.004	4.77501	-0.0170194	NA	4.73363	0.0917086	NA
YCL059C	KRR1	5.14061	0.0062801	NA	5.33583	0.0220375	NA	5.60838	-0.00140246	NA	5.75595	0.263527	0.161	5.60105	0.0229103	NA	5.47572	-0.00302625	NA	5.556	0.0333339	NA
YCL061C	MRC1	4.03002	-0.0680979	NA	4.36085	-0.0717455	-0.013	4.36847	-0.00035056	NA	4.71393	0.0593754	NA	3.8692	0.0658675	NA	4.32334	0.0216397	NA	4.59882	-0.0374971	NA
YCR002C	CDC10	5.07047	0.119454	NA	5.58559	0.042159	NA	6.13867	0.0410904	NA	6.14889	0.286471	0.152	6.14668	0.163814	0.072	6.29515	-0.107995	-0.021	5.6278	0.190266	NA
YCR003W	MRPL32	6.07833	0.385142	0.195	6.32937	0.333273	0.216	6.41254	0.0368401	NA	6.3786	0.244279	0.15	6.51892	0.138345	0.085	6.39471	0.125084	0.063	6.21956	0.0657186	NA
YCR004C	YCP4	7.58351	0.142081	0.032	7.62926	0.0904813	0.015	7.88061	-0.0305491	NA	8.03064	0.0312557	NA	7.91094	0.0430077	NA	7.57208	0.0976404	0.036	7.40756	0.0183352	NA
YCR005C	CIT2	7.03489	0.156326	0.086	6.94793	0.0863455	0.049	5.87517	0.00905168	NA	6.48587	0.0746333	0.037	6.10963	0.11806	0.074	6.5343	-0.00191915	NA	5.88418	0.0735682	NA
YCR007C		3.44302	0.296265	NA	4.39207	-0.0797949	NA	4.13518	-0.00813245	NA	4.02052	0.219545	0.015	3.85378	-0.02469	NA	3.97403	-0.0522572	NA	3.63013	0.100237	NA
YCR009C	RVS161	6.33296	0.144813	NA	6.85312	0.107209	NA	6.78398	0.0612775	NA	7.03203	0.119036	0.019	6.63768	0.200304	0.108	6.89841	0.0770149	NA	6.41942	0.266044	0.075
YCR011C	ADP1	7.49912	0.0457838	NA	7.78169	0.016058	NA	7.8416	0.0253219	NA	8.10954	0.0288969	NA	7.94797	0.205436	0.154	8.1052	-0.0290633	-0.013	7.78842	0.023654	NA
YCR012W	PGK1	14.3385	0.00145474	0	13.8471	0.000414201	0	NA	NA	NA	13.466	0.000216555	0	13.3917	0.000855932	0	13.9681	3.8468e-05	NA	14.198	0.000112141	NA
YCR016W		5.21727	0.141892	NA	5.29926	0.180143	0.061	5.90122	0.0113732	NA	5.88237	0.0365878	NA	5.71868	0.199465	0.125	5.67216	0.0529934	NA	5.7463	0.101479	NA
YCR017C	CWH43	7.29176	0.107227	0.048	7.31145	0.0659207	0.026	7.58186	-0.0130407	NA	7.4978	0.0922217	0.046	7.59122	0.0587799	0.03	7.62749	0.038324	0.007	6.91128	-0.000555515	NA
YCR018C	SRD1	4.89562	0.117276	NA	5.39038	0.128071	NA	4.98647	0.0806009	NA	5.37557	-0.0194587	NA	4.93111	0.069483	NA	5.31413	0.092941	NA	4.94545	0.226271	NA
YCR019W	MAK32	7.25066	0.0100354	NA	7.70103	0.0609716	0.03	8.03142	0.00227689	NA	8.13592	0.00905727	NA	8.00876	0.0353279	0.023	8.05257	0.0104682	NA	7.73193	0.0242233	NA
YCR021C	HSP30	6.3521	0.0230863	NA	6.36437	0.00124746	NA	4.76593	0.020065	NA	5.05011	0.0764536	0.023	5.16647	0.00948808	NA	NA	NA	NA	NA	NA	NA
YCR023C		4.84616	-0.0121176	NA	5.4252	0.0235305	NA	5.85863	0.00519652	NA	5.40724	-0.00717529	NA	5.87583	0.011878	NA	5.55672	-0.0205188	NA	5.26119	-0.0109609	NA
YCR024C	SLM5	4.521	-0.0313912	NA	5.01097	0.0824865	NA	5.13109	-0.0230968	NA	4.92963	-0.00231845	NA	4.89572	0.0916408	NA	5.16541	0.0338424	NA	4.17904	0.092315	NA
YCR024C-B		9.12706	0.148934	0.093	8.90587	0.0647267	0.039	9.09997	0.0139208	0	9.26217	0.0290326	0.017	9.26272	0.0720866	0.054	9.41335	0.0152579	0.007	9.2966	0.015011	0.001
YCR025C		1.72365	0.034856	NA	1.92658	-0.0569026	NA	2.35709	0.060828	NA	3.0486	-0.00622749	NA	2.5254	0.239106	NA	1.70566	0.386207	NA	2.66111	-0.0497586	NA
YCR026C	NPP1	5.77344	0.0774975	NA	6.00957	0.0994611	0.012	6.24855	-0.0702252	NA	6.25735	-0.087072	NA	5.98751	0.0227624	NA	6.09392	0.0794444	0.011	5.81761	0.013854	NA
YCR027C	RHB1	3.88299	0.0970985	NA	4.35187	-0.0956788	NA	4.38701	-0.13081	NA	4.72883	-0.0213585	NA	3.705	-0.099813	NA	4.45577	-0.0417183	NA	3.82378	-0.170127	NA
YCR028C	FEN2	1.51259	-0.0632609	NA	2.4306	-0.218095	NA	2.91968	-0.0239211	NA	4.06704	-0.19074	-0.032	2.21052	-0.126301	NA	2.94216	0.0154087	NA	2.2338	0.105925	NA
YCR028C-A	RIM1	7.57668	0.0997744	0.044	7.49887	0.0746975	0.028	7.54972	0.0150193	NA	7.55204	0.0690815	0.022	7.45825	0.0477802	0.013	7.61883	0.0838239	0.045	6.9901	0.0666251	NA
YCR030C	SYP1	6.32563	0.0639095	NA	6.49168	0.0115202	NA	5.72207	0.00444802	NA	5.43165	0.0222282	NA	5.99851	0.0312832	0.009	NA	NA	NA	NA	NA	NA
YCR031C	RPS14A	10.9761	0.03374	0.018	11.0104	0.0229237	0.014	12.025	0.00100817	NA	11.5412	0.0361332	0.025	11.8054	0.022857	0.018	11.2706	0.00645079	0.003	11.2356	0.00565422	0
YCR032W	BPH1	4.84577	0.0369914	NA	5.23606	0.104577	NA	5.74383	-0.0192771	NA	5.78711	-0.0541867	NA	5.49217	0.0759464	NA	5.3308	0.0370476	NA	4.7329	-0.0219038	NA
YCR034W	ELO2	6.2032	0.118394	NA	6.39682	0.0245611	NA	7.6375	0.00824961	NA	7.23911	0.0265097	NA	7.42301	0.0742986	0.037	7.42444	-0.000984133	NA	7.08375	0.0965421	0.019
YCR036W	RBK1	5.41979	0.195321	0.036	6.28876	0.128675	0.057	6.16508	0.0309558	NA	6.40648	0.0761779	0.003	5.98352	0.140493	0.069	6.259	0.00966365	NA	5.74011	0.106292	NA
YCR037C	PHO87	4.36624	-0.0217296	NA	5.29533	-0.0416926	NA	5.42186	-0.0166219	NA	5.07102	-0.0241455	NA	5.04011	0.00827804	NA	5.5417	-0.0301949	NA	4.4192	0.0204427	NA
YCR038C	BUD5	3.80459	0.193348	NA	4.6469	0.125363	NA	4.32094	-0.0543022	NA	4.65441	-0.0343888	NA	4.26676	0.0649535	NA	4.39787	0.0156767	NA	4.01339	0.280405	NA
YCR043C		5.99375	0.0829565	NA	5.48603	-0.0204704	NA	5.46636	-0.0216637	NA	5.20482	0.123436	0.034	5.51353	0.114049	0.055	5.80754	-0.027342	NA	5.9225	-0.0152885	NA
YCR044C	PER1	4.65757	0.292791	0.09	4.95746	0.209889	0.099	NA	NA	NA	4.70377	0.0726085	0.013	4.69949	0.051279	0.011	NA	NA	NA	NA	NA	NA
YCR046C	IMG1	7.36059	0.442524	0.295	7.59138	0.355192	0.253	7.6363	-0.0159301	NA	7.383	0.176327	0.099	7.4736	0.253049	0.182	7.55544	0.050393	0.013	7.66635	0.0879152	0.012
YCR047C	BUD23	4.94775	-0.030079	NA	5.16923	-0.0734251	NA	5.83022	-0.0257859	NA	5.50316	-0.191978	-0.079	5.84614	0.0460726	0.015	5.8858	-0.0360107	NA	5.59637	-0.156379	NA
YCR053W	THR4	9.21896	0.318114	0.217	9.11679	0.139559	0.072	9.13582	0.0803612	NA	9.32091	0.115778	0.051	9.21185	0.239468	0.174	9.31216	0.0502193	0.012	9.02975	0.0158333	NA
YCR054C	CTR86	4.04505	0.268479	NA	4.38975	0.211771	0.054	3.83912	0.147131	NA	4.23257	0.093154	NA	3.80976	0.350734	0.168	4.11287	0.00491136	NA	4.20769	-0.0348355	NA
YCR060W	TAH1	6.10972	0.189276	0.049	6.36022	0.0501106	0.009	6.87852	0.00458137	NA	6.35208	0.047662	0.012	6.56562	0.020111	0.003	6.3256	-0.000899384	NA	6.90002	0.0253522	NA
YCR061W		6.96916	0.0624722	0.008	7.10335	0.0630268	0.025	6.27614	0.00813092	NA	6.51925	0.0246745	NA	6.33954	0.0607624	0.026	6.6046	0.0401038	NA	6.31622	0.0255055	NA
YCR065W	HCM1	4.32216	-0.0992379	NA	5.44935	-0.0545298	NA	5.31008	0.0277974	NA	5.86226	-0.0407259	NA	5.3363	0.0261745	NA	5.37362	-0.0262624	NA	5.40619	0.0220558	NA
YCR066W	RAD18	4.58166	0.122903	NA	4.79776	0.088332	NA	4.10873	-0.0402992	NA	4.2963	0.0709854	NA	4.2441	0.0472624	NA	4.24388	0.0920821	NA	3.62661	-0.00462026	NA
YCR068W	ATG15	0.922232	0.296722	NA	1.54352	0.0141762	NA	1.76849	-0.048066	NA	3.30989	0.169847	NA	1.09592	-0.0921156	NA	1.64732	0.0552332	NA	2.12847	-0.122956	NA
YCR069W	CPR4	6.45383	0.172915	NA	7.31007	0.0267633	NA	7.63901	0.0012087	NA	7.67751	0.0745867	0.041	7.61913	0.0426592	0.023	7.40012	0.0617693	0.031	6.9994	0.0103319	NA
YCR071C	IMG2	5.85602	0.491188	0.288	6.2066	0.509885	0.384	6.01982	0.0696319	NA	6.06636	0.378775	0.255	6.04142	0.347633	0.249	5.97644	0.119368	0.05	5.849	0.211098	0.059
YCR073C	SSK22	4.50231	0.0686078	NA	4.1394	-0.0337047	NA	4.57107	-0.0358365	NA	3.29208	0.0323632	NA	4.29075	0.105765	0.002	4.53824	-0.0154479	NA	4.15457	-0.00065153	NA
YCR073W-A	SOL2	5.29582	0.341735	0.13	5.6259	0.232315	0.125	5.75559	0.0230609	NA	5.61447	0.156292	0.077	5.63428	0.153025	0.093	6.36536	0.0526326	0.022	6.65077	-0.00500393	NA
YCR076C	FUB1	6.02277	0.0917471	NA	6.23023	0.0279119	NA	7.27007	0.00929076	NA	6.67068	0.0980697	0.048	7.28099	0.0289277	0.014	7.13856	0.04387	0.021	6.9285	0.00859765	NA
YCR077C	PAT1	5.96328	0.00754032	NA	6.06433	0.0115417	NA	5.7267	0.00361284	NA	5.69895	0.00425658	NA	5.8273	0.0102523	NA	6.03426	-0.0099735	NA	5.81436	-0.0521065	NA
YCR083W	TRX3	6.06857	0.307564	0.13	5.86529	0.403887	0.265	5.34033	0.0157628	NA	5.83443	0.0193887	NA	5.44066	0.195204	0.075	4.93577	0.314543	0.138	6.28692	0.0828315	NA
YCR084C	TUP1	6.49072	0.177559	0.1	6.50533	0.0962023	0.023	6.46789	0.0565135	NA	6.20267	-0.161829	-0.052	6.47572	0.133782	0.079	6.66988	0.0230066	NA	6.31029	0.102078	NA
YCR087C-A		5.02686	0.0409771	NA	5.41052	0.0389494	NA	5.73069	0.00301206	NA	6.04865	-0.00137657	NA	5.48798	0.0269821	NA	5.41313	-0.00676884	NA	5.53614	0.0541092	NA
YCR091W	KIN82	1.82986	-0.406919	-0.085	3.18483	-0.109331	NA	2.47402	0.143078	NA	2.8608	-0.0176462	NA	2.52195	0.123965	NA	2.63688	0.0797621	NA	2.1125	-0.272191	NA
YCR092C	MSH3	4.62613	0.594427	0.395	5.08503	0.4823	0.325	4.98002	0.0510813	NA	5.31889	0.254949	0.105	5.41581	0.359472	0.224	5.05442	0.121699	NA	4.76023	0.450157	0.195
YCR094W	CDC50	5.20365	0.102863	NA	5.81221	-0.000907177	NA	5.72	0.0339071	NA	5.40793	-0.0713608	NA	5.8623	0.064117	NA	5.9698	0.0290225	NA	5.3315	0.132099	NA
YCR102C		2.365	0.438524	0.027	3.10197	0.192331	NA	2.48256	0.0931892	NA	2.57212	0.389939	0.085	2.59935	0.333753	0.085	2.95478	0.120507	NA	2.57657	0.439207	0.012
YCR105W	NA	NA	NA	NA	2.47212	0.299826	NA	2.81769	0.117099	NA	NA	NA	NA	1.98735	0.186571	NA	2.10865	0.272554	NA	NA	NA	NA
YCR107W	AAD3	2.84507	0.0681975	NA	3.40794	0.0327954	NA	3.75222	0.0630528	NA	3.5337	0.0763217	NA	3.57198	0.0549419	NA	3.65657	0.0335407	NA	3.35155	0.0912322	NA
YDL001W	RMD1	4.40649	0.516244	0.225	4.82106	0.235523	0.092	4.44793	-0.00373653	NA	5.63545	0.112161	0.029	4.31712	0.202525	0.076	4.4553	0.0373388	NA	4.27206	0.116431	NA
YDL002C	NHP10	5.37058	0.149079	NA	5.88239	0.00165206	NA	6.36376	0.0262592	NA	5.90846	-0.289458	-0.153	6.2007	0.116999	0.058	6.25879	-0.0268476	NA	5.79931	0.125581	NA
YDL003W	MCD1	6.89098	0.0555083	NA	7.05069	0.0219946	NA	7.32635	0.0123528	NA	8.0087	0.0367245	0.018	7.27777	0.0886532	0.059	8.04834	0.011104	NA	7.60358	0.0158576	NA
YDL004W	ATP16	6.76758	0.258632	0.093	6.77081	0.344176	0.212	6.87665	0.0865574	NA	6.96061	0.0994042	NA	6.99814	0.194461	0.109	6.90331	0.102654	0.014	6.60316	0.0170912	NA
YDL006W	PTC1	5.77749	0.0510465	NA	5.63856	0.0410449	NA	5.71722	-0.0083826	NA	5.15984	0.0514161	NA	5.63482	0.112631	0.06	5.90849	0.0118383	NA	5.99671	0.0559372	NA
YDL007W	RPT2	7.97819	0.207587	0.115	8.04244	0.164917	0.093	7.28557	0.0254362	NA	7.68314	0.0136633	NA	7.37771	0.301689	0.22	7.61485	0.00523303	NA	7.481	0.0558005	NA
YDL008W	APC11	3.93033	0.0943506	NA	4.57952	-0.0242476	NA	4.38249	-0.0474174	NA	4.32998	0.00847523	NA	4.12976	0.0336319	NA	4.28486	-0.0433801	NA	4.2394	0.0887313	NA
YDL010W	GRX6	3.87641	-0.613264	-0.29	4.39372	-0.165396	NA	4.87019	-0.0904018	NA	5.27878	-0.261588	-0.12	4.75749	-0.168011	-0.051	5.03945	-0.0130996	NA	4.84045	-0.401292	-0.129
YDL012C		6.85387	0.0696844	NA	7.08474	0.060721	NA	7.75142	0.00982863	NA	7.51106	-0.0031636	NA	7.53417	0.0221049	NA	7.64088	0.000476125	NA	7.06132	0.0627609	NA
YDL013W	SLX5	4.5964	-0.0128796	NA	5.33416	0.0354152	NA	5.23055	-0.0075469	NA	5.19408	0.0162516	NA	5.22043	0.0195483	NA	5.15809	-0.0304615	NA	5.00287	-0.0141374	NA
YDL014W	NOP1	8.858	-0.00384658	NA	9.20902	0.0151466	0.006	9.52709	0.00677272	NA	9.35067	-0.0504111	-0.027	9.40731	0.00794116	NA	9.19769	0.00283557	NA	9.15857	0.0121224	NA
YDL018C	ERP3	4.46285	0.319677	NA	4.52486	0.420945	0.214	5.82592	-0.00263536	NA	5.69083	0.166878	0.034	5.62778	0.141415	0.041	5.98531	0.237019	0.108	4.93307	0.125853	NA
YDL019C	OSH2	6.43977	-0.195385	-0.073	6.47497	0.0415198	NA	6.35596	0.007783	NA	6.42521	-0.0190527	NA	6.49329	0.0564414	NA	6.28572	-0.029269	NA	6.22294	-0.136152	NA
YDL021W	GPM2	6.60959	0.363901	0.206	6.42152	0.286378	0.174	6.20905	0.00974273	NA	6.35998	0.212243	0.114	6.37448	0.171438	0.102	6.79986	0.0716557	0.02	6.58007	0.143736	0.03
YDL022W	GPD1	8.90036	0.171369	0.121	8.8577	0.166114	0.125	8.04622	0.0397802	NA	8.54594	0.0924864	0.049	8.34249	0.11402	0.08	8.53442	0.0723736	0.037	8.12572	0.095389	0.037
YDL024C	DIA3	3.99552	0.163999	NA	4.22671	0.0451897	NA	4.14581	0.133984	NA	4.03083	-0.243526	-0.066	4.20353	0.0132404	NA	3.89987	0.12629	NA	3.24506	0.211432	NA
YDL025C	RTK1	5.56335	0.322792	0.132	6.015	0.273917	0.145	5.78913	0.0242062	NA	6.05284	0.296129	0.166	5.87567	0.225516	0.123	5.73252	0.25297	0.117	5.30956	0.327099	0.118
YDL026W		4.29891	0.069848	NA	4.04822	0.0784241	NA	3.89295	0.0207935	NA	3.24529	-0.437758	-0.141	3.69343	-0.0745698	NA	3.38234	0.00220738	NA	3.35866	0.107728	NA
YDL027C		5.48811	0.0688311	NA	5.80384	0.280689	0.17	5.76658	0.0944628	0.003	6.15527	0.0813557	0.012	5.80477	0.173741	0.112	5.85242	0.132595	0.054	5.38537	0.0713731	NA
YDL028C	MPS1	5.33246	0.419442	0.232	5.40872	0.169804	0.081	4.97396	0.0166528	NA	5.02379	0.0508582	NA	4.8596	0.174907	0.09	5.34857	0.0239811	NA	5.29713	0.00127048	NA
YDL029W	ARP2	6.62247	0.395169	0.233	6.51256	0.333835	0.204	6.41644	0.00949803	NA	6.58534	0.352059	0.219	6.29122	0.243107	0.141	6.53972	0.277888	0.153	6.20482	0.180131	NA
YDL031W	DBP10	6.60057	0.213006	0.096	6.66604	0.195224	0.117	6.79367	0.00678944	NA	6.79231	0.00874603	NA	6.66194	0.110567	0.071	6.47941	0.0891151	0.044	6.70238	0.0115338	NA
YDL033C	SLM3	3.58745	0.0805753	NA	4.35547	-0.0287018	NA	4.90767	0.0202337	NA	5.05497	-0.192757	-0.061	4.50999	0.0760734	NA	4.76959	-0.00734231	NA	4.65435	-0.203367	NA
YDL036C	PUS9	2.50862	0.125956	NA	3.96094	-0.029402	NA	4.79112	0.0224069	NA	4.88272	0.111631	0.014	4.01278	0.0261068	NA	4.25209	0.0374851	NA	3.24485	0.137961	NA
YDL039C	PRM7	5.63271	0.0551436	NA	5.87159	0.059846	0.018	NA	NA	NA	4.99842	0.0266775	NA	4.96175	0.0490798	0.006	5.58328	-0.0028748	NA	5.66683	0.0023756	NA
YDL042C	SIR2	4.19656	-0.0184596	NA	4.5278	0.173079	NA	5.49695	0.0149829	NA	4.81439	0.0595873	NA	5.0443	0.08859	0.022	5.16541	0.0299777	NA	4.56262	0.099975	NA
YDL043C	PRP11	4.03634	0.0465874	NA	4.34539	-0.0147014	NA	4.71354	-0.0244193	NA	4.88351	-0.476916	-0.294	4.38355	-0.0297029	NA	4.8353	-0.102647	NA	4.18752	-0.214279	NA
YDL046W	NA	NA	NA	NA	8.75564	0.00218067	NA	7.92602	0.00149914	NA	NA	NA	NA	8.13477	0.00875302	0.003	NA	NA	NA	NA	NA	NA
YDL047W	SIT4	5.29179	-0.166837	NA	5.55819	-0.0946886	NA	4.97209	-0.122955	NA	5.28003	-0.215939	-0.073	4.99626	0.0059221	NA	5.28127	-0.06395	NA	5.02385	-0.152684	NA
YDL051W	LHP1	6.54397	0.307747	0.136	7.04424	0.173003	0.081	7.04722	-0.0102198	NA	7.06275	0.543037	0.416	6.90603	0.22411	0.143	6.8538	0.183412	0.082	6.46599	0.137474	NA
YDL052C	SLC1	7.72837	0.128802	0.048	8.00161	0.153798	0.096	8.33678	0.00443482	NA	8.45052	0.0610198	0.032	8.15363	0.0944983	0.065	8.12595	0.014931	NA	7.54069	0.0506652	NA
YDL053C	PBP4	6.83452	0.11034	0.039	7.179	0.0355917	0.01	6.42487	-0.00232864	NA	6.65053	0.18717	0.118	6.5397	0.0374735	0.014	6.67981	0.000647227	NA	6.43547	0.0345598	NA
YDL055C	PSA1	8.52258	0.120127	0.012	8.32916	0.174045	0.081	9.02469	-0.0724754	NA	9.07318	-0.02379	NA	8.79461	0.224566	0.157	9.09778	0.0148899	NA	8.49432	0.0437995	NA
YDL057W		3.99073	0.0240031	NA	4.65059	0.159286	NA	4.72398	0.00987951	NA	4.66561	0.133555	NA	4.18548	0.0358588	NA	4.91204	0.0497632	NA	4.13231	0.158491	NA
YDL058W	USO1	4.6643	0.0438295	NA	5.02536	0.165165	0.058	4.78508	0.00830516	NA	4.72021	0.0848866	NA	4.4747	0.106465	0.021	4.5676	0.00231005	NA	4.44469	0.00510911	NA
YDL060W	TSR1	4.33514	0.37543	0.106	4.70113	0.141312	0.036	4.82143	0.0112792	NA	4.75827	0.0395394	NA	4.81535	0.132019	0.061	4.98508	0.0364724	NA	5.67772	0.0169219	NA
YDL061C	RPS29B	8.56443	0.257242	0.16	8.72373	0.19457	0.137	9.01533	0.00986384	NA	8.81423	0.207146	0.144	9.12995	0.0991277	0.074	8.75218	0.0906394	0.055	8.50051	0.100311	0.035
YDL063C	SYO1	4.07443	0.102126	NA	4.96251	0.00509326	NA	5.95773	-0.00232764	NA	5.73238	0.0314096	NA	5.33189	0.0387767	NA	5.65185	0.0596978	NA	5.2453	0.0356286	NA
YDL064W	UBC9	6.45631	0.67037	0.483	6.62509	0.484563	0.35	6.87135	0.0621315	NA	6.71857	0.532876	0.397	6.82048	0.311819	0.216	6.86794	0.342524	0.227	6.92521	0.422528	0.257
YDL066W	IDP1	7.45849	0.00141979	NA	7.18679	0.103917	0.03	7.20797	0.00878832	NA	7.23337	0.333338	0.226	7.29201	0.21359	0.145	7.30386	0.110838	0.054	7.37254	0.0157565	NA
YDL067C	COX9	6.61887	0.110368	NA	6.89534	0.0386681	NA	7.01637	0.00579259	NA	6.81418	0.0880057	0.043	6.94708	0.0272947	NA	6.96442	0.0243823	NA	7.53272	0.0279768	NA
YDL070W	BDF2	6.59839	0.290247	0.145	6.48402	0.267927	0.151	6.72424	0.054739	NA	7.07289	0.2178	0.109	6.63182	0.210004	0.122	6.93979	0.199091	0.104	6.47844	0.255292	0.095
YDL072C	YET3	7.82371	0.849207	0.769	7.75144	0.738087	0.649	7.49734	0.147635	0.028	7.90163	0.182551	0.108	7.47893	0.450974	0.351	7.78861	0.242941	0.166	7.45553	0.530287	0.377
YDL073W		5.55183	0.532841	0.322	5.53173	0.410406	0.261	5.09209	0.0235795	NA	5.3974	0.102336	NA	5.29172	0.360392	0.224	5.21417	0.15764	0.04	4.8333	0.224659	NA
YDL074C	BRE1	5.24692	0.15179	NA	5.51648	0.307283	0.151	5.69349	0.0407941	NA	5.25393	0.00668586	NA	5.85213	0.244017	0.142	5.54779	-0.011625	NA	4.81217	0.314929	0.017
YDL075W	RPL31A	9.25588	0.137417	0.077	9.11325	0.0347343	0.004	9.76038	0.00369774	NA	9.45806	0.103759	0.062	9.6207	0.181855	0.138	9.46335	-0.0170883	-0.002	9.15048	-0.00507874	NA
YDL076C	RXT3	5.23862	0.05647	NA	5.44328	0.100486	0.018	5.145	-0.00237854	NA	5.27285	-0.209468	-0.074	5.27678	0.0973955	0.03	5.18378	-0.0911763	NA	4.31599	0.0238474	NA
YDL077C	VAM6	5.17227	0.114054	NA	5.03254	0.151298	0.011	5.38497	0.04785	NA	5.32772	0.188354	0.065	5.4965	0.224586	0.122	5.48487	0.041267	NA	4.87877	0.134355	NA
YDL078C	MDH3	5.47514	0.0288939	NA	5.82959	0.0566971	NA	6.34799	0.0170904	NA	5.85382	0.135222	0.037	6.5222	0.119815	0.06	6.47894	0.108476	0.041	5.90715	0.125948	NA
YDL080C	THI3	4.2222	-0.0622075	NA	4.94325	-0.00544612	NA	5.36292	-0.0330671	NA	5.17397	-0.0287371	NA	4.98623	-0.0274007	NA	5.20248	-0.0308737	NA	4.73629	0.0292578	NA
YDL081C	RPP1A	11.0113	0.043473	0.029	10.78	0.0145774	0.008	11.2136	-0.00136887	NA	11.0914	0.00201271	NA	11.1894	0.0062331	0.004	11.012	0.000568062	NA	11.0815	0.00233949	NA
YDL082W	RPL13A	7.93726	0.391049	0.271	7.91234	0.318228	0.237	7.98191	-0.0250839	NA	8.09058	0.0447912	0.007	7.98187	0.0758135	0.045	8.12088	0.049998	0.02	7.85478	0.0244788	NA
YDL083C	RPS16B	9.6201	0.266845	0.185	9.75893	0.101369	0.068	10.4257	0.00925443	NA	10.0606	0.323867	0.245	10.4099	0.0854672	0.068	10.1151	0.0515971	0.038	9.40169	0.083588	0.037
YDL084W	SUB2	8.18161	0.845665	0.763	8.0253	0.836042	0.765	8.62559	0.065602	0.006	8.8482	0.382729	0.285	8.5795	0.312156	0.242	8.29114	0.35837	0.269	8.14195	0.324638	0.207
YDL085C-A		5.16685	0.108579	NA	5.20127	0.185946	NA	6.17155	0.0201467	NA	5.84935	0.404435	0.242	6.05261	0.22396	0.109	5.6584	0.201383	0.06	5.33575	0.00421708	NA
YDL085W	NDE2	2.2959	0.50044	0.112	2.98689	0.154064	NA	2.30053	0.158644	NA	2.75046	0.205453	NA	2.50311	0.409187	0.138	2.43587	0.273997	NA	3.03331	-0.0337657	NA
YDL086C-A		2.99185	0.0530806	NA	2.62777	-0.157457	NA	3.66372	-0.0939229	NA	3.1091	0.102689	NA	2.13837	-0.095336	NA	2.92415	0.125943	NA	3.57323	-0.0918504	NA
YDL086W		7.57444	-0.00487522	NA	7.55753	0.184433	0.095	8.19779	0.0023468	NA	7.31181	0.120074	0.043	7.96783	0.0957112	0.052	7.76396	0.16871	0.1	7.95149	-0.00369634	NA
YDL088C	ASM4	6.45737	0.0410241	NA	6.4187	0.0169874	NA	5.78097	0.0125419	NA	5.97342	0.00425827	NA	5.93469	0.0533521	0.021	6.1614	0.0329155	NA	6.37277	0.00861425	NA
YDL090C	RAM1	3.36366	-0.195485	NA	3.65397	-0.0599861	NA	4.3879	-0.0347011	NA	4.28104	-0.0911041	NA	4.08266	-0.0390924	NA	4.34996	-0.11173	NA	3.58612	0.0851097	NA
YDL095W	PMT1	7.52338	0.0442633	NA	7.6477	0.0354697	NA	8.97079	-0.00710196	NA	7.86075	0.247489	0.161	8.41326	0.0841079	0.051	8.58379	0.11857	0.076	7.61343	0.097564	NA
YDL101C	DUN1	6.48882	0.0528577	NA	6.75163	0.0391429	NA	6.36159	0.0363087	NA	6.90199	0.12676	0.075	6.60919	0.12008	0.077	6.70422	0.0796967	0.04	6.1503	0.12022	0.014
YDL102W	POL3	5.70535	0.279377	0.075	6.06441	0.131871	0.049	6.49792	0.0119339	NA	6.94672	0.00931178	NA	6.59733	0.0465055	0.017	6.74524	0.0359534	0.005	6.50887	0.0790999	NA
YDL103C	QRI1	5.58107	0.472921	0.239	5.83549	0.314442	0.177	5.99559	0.0375991	NA	6.34843	0.20801	0.113	6.02582	0.386179	0.272	6.02239	0.0447329	NA	5.73097	0.279737	0.081
YDL104C	QRI7	4.06555	-0.468769	-0.226	4.3561	-0.197456	-0.014	4.23694	-0.0294405	NA	4.71765	-0.01814	NA	3.22419	-0.0843782	NA	4.09736	0.00735015	NA	3.89941	-0.250612	NA
YDL105W	NA	NA	NA	NA	3.047	-0.028583	NA	3.14164	-0.0193554	NA	3.28848	-0.417122	-0.185	2.65543	-0.0197034	NA	3.3803	-0.0295111	NA	NA	NA	NA
YDL106C	PHO2	5.30406	-0.0908405	NA	5.74814	0.0372749	NA	5.00671	0.0131111	NA	5.34757	0.11798	0.032	5.73487	0.145251	0.079	5.27727	0.0242649	NA	5.08444	0.0968821	NA
YDL107W	MSS2	5.39107	0.148652	0.025	5.67224	0.129455	0.06	5.12504	0.0369022	NA	5.19156	0.129264	0.053	5.25496	0.150143	0.087	5.46142	0.0525975	0.013	5.58281	0.0211326	NA
YDL110C	TMA17	7.26993	0.0353309	NA	7.28775	0.019759	NA	6.85488	0.00270311	NA	6.99449	0.0285117	NA	7.07947	0.0642516	0.04	7.29393	0.0199339	NA	6.85714	-0.00414438	NA
YDL111C	RRP42	6.90752	0.0766036	NA	7.33825	0.0782078	0.02	7.51529	0.0181364	NA	7.23802	0.131219	0.064	7.35454	0.089117	0.048	7.47849	-0.0148781	NA	6.91732	0.0426243	NA
YDL112W	TRM3	4.83509	0.0219057	NA	5.35542	-0.0417986	NA	6.03416	-0.00260387	NA	5.45156	0.0713183	NA	6.13478	0.0381909	NA	5.86998	0.0176937	NA	5.38559	-0.0416195	NA
YDL113C	ATG20	5.64648	0.0158648	NA	6.1243	0.019984	NA	NA	NA	NA	5.69189	0.00980389	NA	5.50769	0.0219128	NA	NA	NA	NA	NA	NA	NA
YDL115C	IWR1	5.45206	0.217465	0.072	5.89576	0.0744253	0.028	NA	NA	NA	NA	NA	NA	5.50165	0.0791952	0.04	NA	NA	NA	NA	NA	NA
YDL116W	NUP84	6.20637	0.10619	NA	6.70181	0.123156	0.061	6.59634	0.016355	NA	6.46057	0.138546	0.072	6.32067	0.134663	0.082	6.51772	0.0564363	0.017	6.01421	0.039969	NA
YDL117W	CYK3	4.98686	0.264314	0.086	5.40401	0.0630108	0.01	4.83523	0.0168813	NA	4.68056	0.0411266	NA	4.84152	0.20142	0.116	5.09922	0.00395289	NA	5.38411	0.0405235	NA
YDL119C		5.86106	0.38452	0.214	5.89303	0.247113	0.142	5.54543	0.0104814	NA	5.1968	0.226184	0.079	5.75194	0.253221	0.164	5.66917	0.18123	0.082	5.71066	0.194855	0.06
YDL120W	YFH1	6.14893	0.135808	NA	6.40766	0.131823	0.006	6.77259	-0.0493855	NA	6.37308	-0.17591	-0.055	6.47846	0.124521	0.04	6.65316	0.0357017	NA	6.15677	0.0554295	NA
YDL121C		4.72741	-0.150707	NA	5.37773	-0.092681	NA	6.06577	-0.05899	NA	5.77204	-0.156213	-0.062	5.62757	0.108195	0.016	6.02476	-0.0500158	NA	5.24911	0.0575489	NA
YDL122W	UBP1	7.22734	0.0542919	0.01	7.3159	0.0340512	0.013	6.69524	0.00187513	NA	6.67805	0.0524129	0.022	6.5556	0.0476915	0.023	6.77889	-0.00160652	NA	7.13899	0.00126999	NA
YDL123W	SNA4	2.96236	-0.635501	-0.234	3.77767	-0.130933	NA	4.32688	0.00209442	NA	4.57229	-0.202215	-0.084	4.13445	0.00610119	NA	3.75532	-0.0463759	NA	3.68014	-0.0350083	NA
YDL124W		7.64229	0.0094803	NA	NA	NA	NA	7.93973	0.00106815	NA	6.92012	0.0136611	NA	7.67061	0.00805621	0.002	8.09342	0.000410038	NA	NA	NA	NA
YDL125C	HNT1	8.0418	0.350411	0.216	8.35037	0.186844	0.089	8.59537	0.0121373	NA	8.6542	-0.0108854	NA	8.52641	-0.0869066	-0.022	8.19026	0.293178	0.201	8.04454	-0.0474857	NA
YDL126C	CDC48	8.4276	0.279124	0.196	8.57211	0.187933	0.136	8.14857	0.0155242	NA	8.43276	0.35808	0.267	8.11122	0.175376	0.137	8.35057	-0.00100207	NA	8.17867	0.0557467	0.017
YDL128W	VCX1	7.33254	0.0430929	0.015	7.79162	0.0458598	0.025	7.3302	0.00443088	NA	7.28765	-0.0091986	NA	7.38177	0.0222562	0.001	7.28893	0.0172046	NA	6.68111	0.0389626	0.001
YDL130W	RPP1B	10.929	0.0434689	0.026	10.857	0.00869208	0.004	11.5581	0.000352045	NA	11.4026	0.00835108	0.005	11.4589	0.0103097	0.007	11.2604	-0.000139326	NA	11.0811	0.00129632	NA
YDL130W-A	STF1	7.72765	0.0899189	0.035	7.66754	0.122129	0.074	7.602	0.0128764	NA	8.11365	0.0411428	0.02	7.74146	0.0560679	0.036	7.90794	0.0262807	0.008	7.28351	0.0179826	NA
YDL131W	LYS21	8.39142	0.0394774	0.012	8.6049	0.0106827	NA	8.05267	0.00981027	NA	8.09148	0.130339	0.088	8.02606	0.0896403	0.066	8.30151	0.0101635	NA	7.49546	0.0307435	NA
YDL133C-A	RPL41B	10.8585	0.0531499	0.037	9.97111	0.0126801	0.006	9.92996	0.000827004	NA	9.91111	0.00710454	0.002	9.8563	0.00933807	0.005	10.2372	0.000418142	NA	10.5099	0.00124101	NA
YDL135C	RDI1	6.56874	0.0707851	NA	6.61566	-0.0429706	NA	7.26253	-0.0263129	NA	7.34574	0.0548521	NA	7.16965	-0.000203447	NA	7.19023	0.0340932	NA	6.45261	-0.0385825	NA
YDL136W	RPL35B	7.80157	0.104997	0.029	7.81791	0.0179583	NA	8.47143	0.0054266	NA	8.38161	0.259065	0.185	8.37597	0.103098	0.073	8.08826	0.0673666	0.037	7.61377	0.0924832	0.012
YDL137W	ARF2	9.05234	0.163266	0.094	8.69919	0.180925	0.126	9.02401	-0.0115102	NA	9.16711	0.0849432	0.047	9.10858	0.129333	0.098	9.0333	0.0686722	0.042	8.41539	0.048335	NA
YDL141W	BPL1	4.16638	-0.013864	NA	4.94	0.048246	NA	5.00915	0.0361937	NA	5.07161	0.113465	NA	4.98423	0.0586274	NA	4.84161	-0.113255	NA	4.58112	-0.00234817	NA
YDL142C	CRD1	5.52841	0.376738	0.181	5.74868	0.281019	0.172	5.43209	0.0356321	NA	5.45021	0.122474	NA	5.60191	0.135856	0.051	5.63319	0.126975	0.032	5.39005	0.202229	0.053
YDL143W	CCT4	7.83454	0.393336	0.272	8.14205	0.246732	0.175	7.71061	0.0263469	NA	7.78949	0.174475	0.113	7.76487	0.152698	0.11	8.22088	0.00937304	NA	8.32749	0.0142578	NA
YDL144C		6.75278	0.139107	0.025	7.1904	0.0911994	0.033	7.34742	0.0158368	NA	7.20617	0.0569958	0.01	7.24212	0.0947957	0.052	7.00134	-0.0343142	-0.002	6.83361	-0.0281009	NA
YDL145C	COP1	7.2	0.0751579	0.034	7.62371	0.0341703	0.013	7.701	0.000642202	NA	7.7538	0.18003	0.125	7.72273	0.0938564	0.068	7.83007	0.028155	0.009	7.41637	0.0546469	0.009
YDL146W	LDB17	5.22441	0.423956	0.252	5.01438	0.45232	0.306	5.17202	0.0590963	NA	5.50407	-0.0928435	NA	5.0631	0.320046	0.187	5.27924	0.0990852	NA	4.87443	0.113897	NA
YDL147W	RPN5	7.12445	0.143236	0.066	7.55335	0.0880014	0.052	6.83924	0.0105588	NA	6.42911	0.11866	0.057	6.87313	0.0684136	0.04	7.28846	0.0135815	NA	7.09568	0.0201269	NA
YDL148C	NOP14	4.92322	-0.132286	NA	5.20194	-0.142241	NA	5.8816	-0.0390555	NA	5.67721	-0.0086788	NA	5.72663	0.0992532	NA	5.68502	0.00305566	NA	5.22207	-0.161344	NA
YDL149W	ATG9	4.23298	0.130512	NA	4.81867	0.193057	0.075	4.13337	0.0214958	NA	4.58835	0.117801	0.021	4.16606	0.199635	0.084	4.39204	0.0119712	NA	4.26555	0.0733334	NA
YDL153C	SAS10	5.27567	0.10037	NA	5.28129	0.0452504	NA	5.23488	-0.0321239	NA	5.28289	0.0663862	NA	5.24803	0.0582018	0.004	5.03116	-0.014889	NA	4.96166	-0.0139578	NA
YDL154W	MSH5	2.66975	-0.076196	NA	3.34989	0.0882944	NA	3.01344	0.00561195	NA	3.50611	0.0426458	NA	3.25122	-0.0112385	NA	3.37144	0.0219357	NA	2.44318	-0.140214	NA
YDL155W	CLB3	4.02993	0.0166379	NA	5.05685	0.0156946	NA	5.65641	-0.00514233	NA	4.60731	-0.09187	NA	5.15388	0.147461	0.041	5.54457	-0.058184	NA	4.62418	0.162454	NA
YDL160C	DHH1	2.38252	-0.174253	NA	2.0788	0.488555	0.13	2.46164	-0.0123108	NA	3.3566	0.288707	0.066	1.44434	0.229596	NA	2.85741	0.142104	NA	1.541	0.00851706	NA
YDL160C-A	MHF2	4.28187	-0.0834464	NA	4.29225	0.193601	NA	5.08556	-0.0394833	NA	3.90899	0.0141109	NA	4.7665	0.022658	NA	4.82982	-0.0620996	NA	4.14017	0.227036	NA
YDL161W	ENT1	5.98778	0.483452	0.289	6.0607	0.48053	0.34	6.0126	0.00585471	NA	6.1172	0.0944788	NA	5.95517	0.340764	0.223	6.2145	0.0993346	0.012	5.60861	0.211927	0.002
YDL165W	CDC36	5.75519	0.170685	NA	6.30144	0.0524542	NA	6.65134	0.0232159	NA	6.47427	0.0358557	NA	6.67819	0.0962204	0.049	6.66966	0.0919561	0.038	6.24433	0.0699993	NA
YDL167C	NRP1	5.29196	0.378554	0.161	5.78422	0.0998595	NA	6.56349	0.0344272	NA	6.23306	0.106366	0.024	6.37452	0.230819	0.161	6.10071	0.193446	0.098	5.79817	0.196257	0.04
YDL168W	SFA1	7.62195	0.300515	0.211	7.61024	0.271326	0.192	6.94166	0.0195678	NA	7.15959	0.262997	0.177	6.98115	0.230818	0.161	7.24511	0.211665	0.134	6.69366	0.226616	0.109
YDL169C	UGX2	6.25408	0.0211947	NA	6.47109	0.0267321	NA	5.71248	-0.000533372	NA	5.47343	0.0103245	NA	5.81853	0.00711283	NA	6.05821	0.00144028	NA	6.22228	0.00297242	NA
YDL170W	UGA3	5.88989	0.0858941	0.034	6.20124	0.0550877	0.01	5.85516	0.0132643	NA	5.85394	-0.0582615	NA	6.04802	0.0510556	0.014	6.07121	0.0295118	NA	5.60233	0.0443276	NA
YDL175C	AIR2	3.87684	0.237224	0.04	4.52026	0.156923	NA	4.51001	0.0809347	NA	4.48385	-0.0454879	NA	4.05791	0.0604429	NA	4.84671	0.10883	NA	4.22837	0.205648	NA
YDL176W		5.63163	0.0351687	NA	6.0292	0.0768829	0.018	6.04786	0.0156582	NA	5.7292	0.151985	0.068	5.90455	0.0840677	0.04	6.04413	0.0283634	NA	5.46925	0.136457	NA
YDL179W	PCL9	5.01526	0.682954	0.445	5.91082	0.497713	0.35	6.03858	0.0844187	NA	5.85956	0.289574	0.151	5.75129	0.416332	0.281	5.88144	0.281679	0.151	5.38714	0.225344	NA
YDL180W		5.48239	0.541651	0.351	5.81107	0.44474	0.303	5.4931	0.0583174	NA	5.63701	0.170906	0.042	5.54407	0.282907	0.163	5.67122	0.254853	0.119	5.21822	0.416098	0.175
YDL181W	INH1	7.03678	0.309871	0.15	7.65255	0.180822	0.114	7.8727	0.037194	NA	7.62468	0.112693	0.065	7.72865	0.134157	0.095	7.79204	0.0487182	0.022	7.29255	0.0828131	0.01
YDL182W	LYS20	8.4314	0.074905	0.038	9.04018	0.0140449	0.007	8.32091	0.0125277	0.002	8.83699	0.0166486	0.009	8.5225	0.0202428	0.013	9.02342	0.00110636	NA	8.72258	0.00281325	NA
YDL183C		5.35757	0.169351	0.055	5.78008	0.134792	0.048	5.18378	-0.0408614	NA	5.24294	-0.0647693	NA	5.42711	0.158948	0.084	5.35594	0.0252934	NA	5.23171	0.0839156	NA
YDL184C	RPL41A	9.49061	0.136222	0.085	9.22423	0.0498187	0.028	10.0106	0.000433081	NA	10.0662	0.00568832	0.002	9.9187	0.00532403	0.002	10.2378	0.00052257	NA	10.2998	-0.000310861	NA
YDL185W	VMA1	8.87007	0.167227	0.109	8.96238	0.0980236	0.067	9.13939	0.0145658	NA	9.28866	0.353293	0.272	9.19101	0.0869886	0.069	8.99091	0.0387186	0.025	8.84187	0.0794474	0.04
YDL188C	PPH22	6.90095	0.267676	0.167	6.89513	0.166161	0.109	6.00402	0.025769	NA	6.2777	0.0169485	NA	6.28506	0.0686828	0.041	6.27364	0.0084687	NA	NA	NA	NA
YDL189W	RBS1	6.92359	0.367139	0.239	6.49152	0.282477	0.18	6.46296	0.0403555	NA	6.59835	0.0388374	NA	6.57104	0.169687	0.115	6.5568	0.0374829	NA	6.57455	0.0745956	NA
YDL190C	UFD2	5.58204	0.0616125	NA	5.94521	0.0271424	NA	6.19097	0.00075174	NA	6.28037	0.00822044	NA	6.19181	0.0395216	0.009	6.33259	0.0245164	NA	5.81283	0.0124974	NA
YDL191W	RPL35A	9.28681	0.0785779	0.037	9.50546	0.0340521	0.017	9.70898	0.00375719	NA	9.55307	0.106382	0.072	9.5777	0.067366	0.05	9.66872	0.0295695	0.018	9.61113	-0.000108437	NA
YDL192W	ARF1	9.45362	0.278793	0.179	9.43363	0.234684	0.15	10.2563	0.0490989	NA	9.67947	0.300044	0.209	10.072	0.227984	0.166	10.0162	0.250885	0.182	9.20262	0.339338	0.213
YDL194W	SNF3	4.63936	-0.0313746	NA	4.63516	0.0414937	NA	4.2772	-0.0349994	NA	4.23892	0.0929464	NA	4.29407	-0.0844725	NA	4.07351	-0.0142975	NA	2.88006	0.0909243	NA
YDL197C	ASF2	7.34301	0.251009	0.133	7.42264	0.181884	0.088	6.91629	0.0755676	NA	7.23689	0.299164	0.193	6.89724	0.317077	0.222	6.81812	0.199217	0.104	7.34526	0.0893346	NA
YDL198C	GGC1	4.90854	0.185121	NA	5.58168	0.296547	0.156	5.93486	0.0463193	NA	5.41962	0.0645272	NA	5.80835	0.142896	0.077	5.84458	0.00830816	NA	5.11246	0.217299	NA
YDL199C		4.51347	0.386718	0.093	5.11596	0.173142	0.054	5.15636	0.0357545	NA	5.10367	0.172128	0.063	5.22748	0.0805422	0.015	4.99118	0.161299	0.053	5.74339	0.0627679	NA
YDL202W	MRPL11	6.24969	0.189188	0.034	6.64461	0.17733	0.085	6.58292	0.0635249	NA	6.32042	0.183951	0.085	6.54934	0.213559	0.136	6.69143	-0.00702264	NA	6.28348	0.177052	0.029
YDL203C	ACK1	4.73518	0.0559454	NA	4.91829	0.0547196	NA	4.73598	0.0296118	NA	4.73251	0.222205	0.072	4.70775	0.31793	0.176	4.72164	-0.00767111	NA	4.58604	0.525916	0.244
YDL205C	HEM3	5.80278	-0.0154853	NA	6.11187	-0.0255168	NA	6.23913	-0.00867351	NA	5.73654	-0.276674	-0.142	6.14666	0.00766117	NA	6.21973	0.0511739	NA	5.81402	0.0535999	NA
YDL206W		5.01791	0.464569	0.231	5.03843	0.214117	0.07	4.44111	0.0869558	NA	4.58995	0.128363	NA	4.44982	0.304824	0.155	4.53361	0.00965701	NA	4.64232	0.0023181	NA
YDL207W	GLE1	4.49596	0.358611	0.085	4.81665	0.312292	0.154	5.00808	0.0395324	NA	4.79203	0.319074	0.171	4.77168	0.323191	0.197	4.96823	0.096768	0.014	4.58661	0.199755	NA
YDL208W	NHP2	8.75562	0.173528	0.113	8.88923	0.014112	0.004	8.82948	0.00543044	NA	8.92673	0.0245546	0.013	8.86238	0.08007	0.062	8.74365	0.00800041	0.001	9.13364	0.0105679	NA
YDL211C		3.80724	-0.0834317	NA	4.38592	-0.106032	NA	4.53619	0.0586807	NA	4.97194	0.00164086	NA	4.30638	0.106786	NA	4.79317	-0.0569038	NA	4.22403	0.142721	NA
YDL215C	GDH2	6.55298	0.0646445	0.009	6.69209	0.0646203	0.026	5.57829	0.0397505	NA	5.47746	-0.00800424	NA	5.74918	0.0237964	NA	5.91982	0.0279804	NA	5.70927	0.0585559	NA
YDL217C	TIM22	3.70829	-0.226222	NA	4.81725	0.112422	NA	5.15547	-0.0420777	NA	5.25331	-0.133081	NA	4.46009	0.00842039	NA	5.20956	-0.0553795	NA	4.18933	-0.122033	NA
YDL219W	DTD1	6.94374	0.27608	0.14	6.85754	0.23476	0.128	7.56456	0.013416	NA	7.56504	0.0291248	NA	7.54439	0.08734	0.022	7.52918	0.11926	0.046	6.88049	0.227805	0.084
YDL223C	HBT1	6.64647	0.0565748	NA	6.81274	0.0581153	0.005	4.48421	-0.0114423	NA	5.28461	-0.0370437	NA	4.82514	0.00572391	NA	4.68822	-0.034924	NA	6.05555	0.0378182	NA
YDL224C	WHI4	6.08527	0.163827	0.045	6.82496	0.0856128	NA	6.46175	0.0144972	NA	6.6015	0.065878	NA	6.64491	0.154265	0.09	6.52358	0.0981514	0.024	6.01607	0.145236	0.009
YDL225W	SHS1	6.62549	0.279374	0.116	7.15593	0.229334	0.14	7.37315	0.0363055	NA	7.31356	0.148408	0.082	7.41518	0.165086	0.114	7.31632	0.107644	0.058	6.80491	0.216378	0.075
YDL226C	GCS1	6.11349	0.0851081	0.013	6.64972	0.0713757	0.008	6.89418	0.0139828	NA	6.98825	0.0922169	0.036	6.77343	0.105137	0.058	6.89424	0.0180957	NA	6.26538	0.108375	NA
YDL229W	SSB1	10.1184	0.0709561	0.044	10.2417	0.00274611	NA	10.3926	-0.000389177	NA	10.3878	0.0218955	0.014	10.2713	0.0129772	0.009	10.2441	-7.07609e-05	NA	10.2323	0.00259899	NA
YDL230W	PTP1	5.14981	0.436327	0.217	5.24554	0.487337	0.329	5.09009	0.0102614	NA	5.39718	0.0463362	NA	5.09888	0.167185	0.075	4.99473	-0.0204585	NA	4.61177	0.0178805	NA
YDL231C	BRE4	4.74711	0.105333	NA	4.48418	0.0813869	NA	4.77304	-0.00327832	NA	5.00824	0.00606441	NA	4.60149	0.167943	0.057	4.4563	0.00879318	NA	4.61198	0.101806	NA
YDL233W	MFG1	5.10982	0.215809	0.029	5.32933	0.249144	0.122	4.67364	0.0113926	NA	4.69437	0.0458717	NA	4.86922	0.202609	0.098	4.93503	0.0209982	NA	4.6582	-0.102749	-0.027
YDL234C	GYP7	5.56609	0.315134	0.117	6.13951	0.44065	0.306	5.46144	0.0290252	NA	5.23231	0.288571	0.13	5.42967	0.240148	0.125	5.51349	0.129495	0.014	5.11973	0.154681	NA
YDL235C	YPD1	7.38251	0.0939386	0.038	NA	NA	NA	NA	NA	NA	NA	NA	NA	NA	NA	NA	NA	NA	NA	NA	NA	NA
YDL236W	PHO13	7.14063	0.0659633	0.019	7.04664	0.0406899	0.015	6.87336	0.00166475	NA	7.12136	0.0144846	0.001	7.1877	0.0319828	0.018	7.06904	0.00442354	NA	6.4383	0.0434154	NA
YDL237W	AIM6	7.15391	0.618165	0.457	7.30595	0.495116	0.371	7.92218	0.131729	0.007	7.87383	0.274697	0.175	7.86064	0.265005	0.189	7.67249	0.23245	0.142	7.23819	0.231942	0.074
YDL238C	GUD1	2.3452	0.162489	NA	3.19517	0.00612375	NA	3.34718	0.0820658	NA	3.31656	0.15765	NA	2.53185	0.163044	NA	3.39906	-0.0494222	NA	3.16178	0.0255838	NA
YDL239C	ADY3	3.81231	0.523847	0.203	4.17371	0.554713	0.339	3.47635	0.0038734	NA	3.80157	0.276554	0.063	3.78795	0.311679	0.118	3.47091	0.113709	NA	3.18875	0.404226	0.052
YDL240W	LRG1	2.95622	-0.365383	NA	3.55442	-0.0493565	NA	4.34981	0.0565814	NA	3.84805	-0.302955	-0.084	4.42137	0.106623	NA	3.68762	-0.383735	-0.108	3.08119	0.0623173	NA
YDL241W		3.11212	0.0395605	NA	3.20358	0.0293449	NA	4.50552	-0.0284254	NA	3.87262	-0.00668889	NA	3.91272	0.00697981	NA	3.79421	-0.0240062	NA	2.63214	-0.0717087	NA
YDL243C	AAD4	4.19724	0.661923	0.448	4.69453	0.345432	0.161	4.40869	0.153274	NA	4.69365	0.466045	0.278	4.47484	0.396224	0.224	4.54013	0.0750765	NA	4.56291	0.323919	0.056
YDL244W	THI13	2.37631	0.181269	NA	2.48352	0.513575	0.212	2.7255	0.291687	NA	2.48774	0.261487	NA	2.75459	0.287912	0.061	2.46991	0.269522	NA	1.57624	-0.010632	NA
YDR001C	NTH1	8.3296	0.0543241	0.023	8.86094	0.0187372	0.006	7.55554	0.0101973	NA	8.07726	0.086147	0.055	7.8398	0.0577349	0.039	8.01087	0.00110876	NA	8.05269	0.00822295	NA
YDR002W	YRB1	10.0005	0.0991302	0.065	9.46843	0.0772501	0.051	10.056	0.000346492	NA	10.2885	0.0029491	NA	10.1702	0.0174572	0.012	9.89016	0.00993185	0.004	9.93477	0.00971792	NA
YDR003W-A		6.09917	-0.0320935	NA	6.66717	-0.0203677	NA	6.30532	0.00407991	NA	6.58416	-0.0576577	NA	6.52447	0.135728	0.066	6.16602	-0.104551	-0.041	6.12662	-0.0414249	NA
YDR004W	RAD57	5.49376	0.15524	NA	6.14168	0.0417999	NA	5.88541	-5.55613e-05	NA	6.0637	0.0780192	0.02	5.84826	0.0728517	0.025	5.86221	0.0253617	NA	5.65007	0.0536024	NA
YDR005C	MAF1	5.39327	0.000838695	NA	5.75787	-0.00483084	NA	5.7962	-0.0143613	NA	5.75288	-0.0270423	NA	5.87219	-0.029284	NA	5.88435	-0.00290849	NA	5.60157	-0.0250555	NA
YDR006C	SOK1	5.04668	0.315282	0.115	5.35316	0.310817	0.18	4.81427	0.0274168	NA	4.97243	0.157768	0.018	4.7118	0.306067	0.168	4.9809	0.0595862	NA	4.81277	0.107214	NA
YDR007W	TRP1	4.48859	0.314804	0.034	4.89041	0.0754886	NA	4.63859	0.0126427	NA	5.25129	0.0503788	NA	3.08177	-0.0821453	-0.009	4.15967	-0.00148654	NA	4.41205	0.0183551	NA
YDR011W	SNQ2	7.32857	0.0191263	NA	7.19736	-0.0121848	NA	7.45169	0.00725262	NA	7.47632	-0.0555748	-0.019	7.85475	0.0190966	0.007	7.65062	-0.00800521	NA	7.36218	0.0167923	NA
YDR014W	RAD61	1.03434	0.00125034	NA	1.6644	-0.433258	-0.028	1.82987	0.0321497	NA	2.30648	-0.527308	-0.194	0.93715	0.197047	NA	2.46465	-0.170456	NA	0.893157	-0.145109	NA
YDR017C	KCS1	6.09954	-0.00127159	NA	6.33599	0.0376006	0.007	6.65518	-0.000485217	NA	6.76401	-0.0100704	NA	6.58376	0.022542	NA	6.46201	-0.0144483	NA	6.40052	-0.00969089	NA
YDR021W	FAL1	4.19281	0.0678318	NA	4.86878	0.0666148	NA	5.46757	-0.00710858	NA	5.44723	0.0155393	NA	5.28028	0.0404104	NA	5.34727	0.0410647	NA	5.41318	-0.0111267	NA
YDR022C	ATG31	4.00188	0.297083	NA	4.57692	0.0836441	NA	5.3956	0.0624468	NA	5.0991	0.34316	0.189	5.38053	0.107615	0.04	5.33074	0.122752	0.038	4.89644	0.0896567	NA
YDR025W	RPS11A	9.20988	0.187196	0.118	9.43025	0.0917199	0.061	10.2066	0.00204512	NA	10.0645	0.0566681	0.037	10.0281	0.0725091	0.056	10.0727	0.00815953	0.001	9.89743	0.0300532	0.01
YDR026C	NSI1	5.23557	0.397815	0.158	5.97142	0.201667	0.069	6.06775	-0.081309	NA	5.9078	0.033948	NA	5.63436	0.141233	0.043	5.99062	0.0896025	NA	4.90651	0.137328	NA
YDR028C	NA	NA	NA	NA	8.80643	0.00316093	NA	8.76006	0.000556131	NA	8.78414	0.00668752	0.001	8.99018	0.00538149	0.002	8.8258	0.00190352	NA	NA	NA	NA
YDR030C	RAD28	1.95548	0.0698043	NA	3.68972	0.0297333	NA	3.62188	0.0784742	NA	3.54119	0.0762763	NA	3.65029	0.241019	0.072	3.63427	-0.114478	NA	3.19268	-0.00787721	NA
YDR031W	MIX14	3.88445	-0.0457445	NA	4.4953	0.0478531	NA	4.66806	0.0845902	NA	4.79661	0.146894	NA	4.66624	0.105505	NA	4.72891	0.140451	0.006	4.33656	0.0661662	NA
YDR032C	PST2	9.51575	0.0687605	0.035	9.01056	0.110887	0.071	8.87604	0.0282531	NA	9.44044	0.088481	0.055	9.20414	0.151709	0.115	9.3321	-0.000771369	NA	9.51316	-0.000525377	NA
YDR033W	MRH1	5.62979	-0.22786	NA	5.25541	-0.174551	-0.002	5.76007	-0.0725532	NA	6.43868	-0.252034	-0.123	5.67164	-0.0249116	NA	5.84307	-0.0455591	NA	5.37316	-0.207511	NA
YDR034C	LYS14	4.45186	0.312492	NA	5.25383	0.233857	0.073	5.69889	0.0368545	NA	5.60824	0.170821	0.057	5.49482	0.120554	0.034	5.55568	0.0881074	NA	5.15488	0.0262545	NA
YDR034W-B		3.24125	0.454931	0.078	3.78996	0.319317	0.074	3.89215	0.109212	NA	3.67313	0.0101202	NA	4.35701	0.145827	0.02	4.03398	0.105256	NA	4.07051	0.138332	NA
YDR035W	ARO3	5.16908	-0.0155271	NA	5.69414	0.174597	0.059	5.52483	-0.0202891	NA	5.71209	-0.287731	-0.145	5.4774	0.131307	0.038	5.39202	-0.0119822	NA	5.37795	-0.128614	NA
YDR037W	KRS1	9.44467	0.00240912	NA	9.53537	0.0211958	0.007	9.77004	-0.000321665	NA	9.18642	0.0307961	0.014	9.65004	0.0285718	0.018	9.56958	0.003267	NA	9.18748	0.0350223	0.007
YDR039C	ENA2	3.76346	0.312045	0.031	4.11719	0.119308	NA	NA	NA	NA	4.82499	0.129711	0.058	4.66276	0.0486754	0.012	NA	NA	NA	NA	NA	NA
YDR040C	NA	NA	NA	NA	NA	NA	NA	NA	NA	NA	4.71432	0.16329	0.081	4.56396	0.0783145	0.032	NA	NA	NA	NA	NA	NA
YDR041W	RSM10	6.44703	-0.0118221	NA	6.38997	-0.0157988	NA	5.84327	0.0394862	NA	5.68579	0.0249991	NA	6.07445	0.058721	0.022	6.32653	-0.00771162	NA	5.97178	0.00720806	NA
YDR044W	HEM13	6.2119	0.0561563	NA	5.64257	0.121454	0.049	5.94964	-0.011551	NA	5.86509	0.205352	0.099	5.86362	0.0936997	0.039	6.02911	0.0246681	NA	5.943	0.0884499	0.014
YDR045C	RPC11	7.40791	0.323183	0.181	7.23729	0.28629	0.173	7.37109	-0.00878767	NA	7.21315	0.313111	0.193	7.28998	0.243023	0.155	7.25918	0.212058	0.113	7.17296	0.350282	0.193
YDR046C	BAP3	7.16065	0.152642	0.003	7.77844	0.231057	0.136	7.89338	-0.0111174	NA	7.90474	0.103655	0.034	7.96263	0.110886	0.057	7.68104	0.184392	0.109	7.609	0.162645	0.047
YDR047W	HEM12	6.6343	0.0646583	NA	6.72175	0.104261	0.045	6.40635	0.00654931	NA	6.33333	0.112821	0.047	6.15747	0.117692	0.063	6.45402	-0.0224388	NA	6.35494	0.0471837	NA
YDR050C	TPI1	11.4321	0.0297555	0.02	11.2775	0.011825	0.007	11.4571	0.000696302	NA	11.5085	0.00721645	0.004	11.4297	0.0142907	0.011	11.5046	0.000967313	0	11.5776	0.0025937	0
YDR055W	PST1	8.04912	0.140115	0.07	8.8414	0.11615	0.079	8.14456	0.0162194	NA	7.77622	0.21022	0.141	8.05562	0.14885	0.112	8.52906	0.0875136	0.061	7.99455	0.130515	0.058
YDR056C		5.56449	0.0128708	NA	5.50201	0.089017	NA	5.89775	-0.0372991	NA	5.792	-0.0496918	NA	5.85425	0.0143783	NA	5.86329	-0.085906	NA	5.27877	-0.0913905	NA
YDR057W	YOS9	4.42974	0.0188523	NA	4.50221	-0.143564	-0.009	4.84539	-0.0170522	NA	4.93423	-0.150786	-0.041	4.84202	0.0026545	NA	4.97623	-0.0105345	NA	4.27998	0.118472	NA
YDR060W	MAK21	8.64151	-0.0043146	NA	8.26416	-0.0057946	NA	8.39553	-0.00231781	NA	8.39221	0.00275248	NA	8.25907	-0.00601157	-0.001	8.04799	-0.00185546	NA	9.1799	-0.00783801	-0.002
YDR061W		6.0666	0.0666787	NA	6.24329	0.00896572	NA	5.93046	0.0162777	NA	6.00592	0.0443823	0.014	5.9583	0.0733989	0.041	NA	NA	NA	NA	NA	NA
YDR063W	AIM7	7.3487	0.237458	0.117	7.60025	0.339981	0.234	7.01807	0.0154734	NA	7.32608	0.100782	0.029	6.96526	0.27441	0.187	6.84968	0.0693654	0.007	6.59066	0.0282416	NA
YDR065W	RRG1	1.94755	-0.543341	-0.154	2.10328	-0.0763599	NA	2.40098	-0.0248986	NA	2.97938	-0.261616	NA	2.26538	-0.376527	-0.084	2.29801	-0.00114199	NA	1.42658	0.0379114	NA
YDR066C	RTR2	3.1501	0.0479993	NA	3.9209	-0.011748	NA	3.89231	-0.136431	NA	3.7257	-0.0645349	NA	3.80582	0.00253671	NA	4.14744	0.0204737	NA	2.83604	0.0118138	NA
YDR068W	DOS2	6.36944	0.269572	0.081	6.71478	0.212548	0.111	7.19967	0.0359155	NA	7.11237	0.113494	0.049	7.17286	0.176025	0.118	6.9489	0.199974	0.12	6.63314	0.190117	0.046
YDR069C	DOA4	5.74799	0.0509739	NA	6.106	0.0281077	NA	5.71179	0.0322004	NA	5.74846	0.0391225	NA	5.57804	0.0717778	0.018	6.11628	0.0206689	NA	5.69202	0.100638	0.022
YDR070C	NA	NA	NA	NA	5.96753	0.0167254	NA	4.6287	0.000952453	NA	4.68515	0.0217312	NA	5.1361	0.0381776	0.006	NA	NA	NA	NA	NA	NA
YDR074W	TPS2	7.81188	0.00963688	NA	7.71731	0.00419062	NA	NA	NA	NA	7.12175	0.00953455	NA	7.0119	0.0127847	0.004	NA	NA	NA	NA	NA	NA
YDR075W	PPH3	4.6718	0.508205	0.222	5.18784	0.0429193	NA	5.26316	0.00836484	NA	4.93148	0.0212667	NA	5.12128	0.155038	0.079	4.89797	0.00565533	NA	4.79186	0.198243	NA
YDR077W	SED1	11.4905	0.011605	0.006	11.1211	0.011809	0.007	10.6716	0.00461107	NA	11.1775	0.00310256	NA	10.9478	0.0111068	0.007	11.5173	0.00908997	0.005	11.0828	0.0104068	0.004
YDR079C-A	TFB5	4.90158	-0.0654467	NA	5.0185	-0.00837784	NA	5.81527	0.0103512	NA	5.3012	0.00994695	NA	5.56742	0.0209171	NA	5.15615	0.0354552	NA	5.20554	0.00971007	NA
YDR079W	PET100	6.78565	0.220617	0.067	5.80201	0.156426	NA	6.67089	0.0282294	NA	6.52841	0.277808	0.151	6.65263	0.192044	0.11	6.47257	0.132145	0.035	5.89721	0.289476	0.049
YDR080W	VPS41	4.50381	-0.0659552	NA	5.05256	0.0349838	NA	5.48624	0.00698438	NA	5.27358	-0.00656672	NA	5.2857	0.029309	NA	5.26714	-0.0275654	NA	5.04314	-0.0222029	NA
YDR081C	PDC2	4.8381	0.262321	NA	5.94178	0.187984	0.063	5.67618	0.031467	NA	5.74698	0.247155	0.11	5.7242	0.311694	0.192	5.72635	0.0505502	NA	5.54551	0.15995	NA
YDR084C	TVP23	4.31695	-0.150839	NA	4.89342	0.178016	NA	5.50808	-0.085681	NA	5.23345	0.0747946	NA	5.3613	0.012086	NA	5.27796	0.191672	0.053	4.40032	0.187282	NA
YDR085C	AFR1	5.118	0.115371	NA	5.48947	0.112069	0.027	5.51376	0.0320482	NA	5.37642	0.091641	0.018	5.54823	0.198316	0.12	5.74931	0.0261095	NA	4.68261	0.193038	NA
YDR086C	SSS1	8.72493	0.0363347	NA	8.58734	0.036523	0.008	9.20331	0.00762222	NA	8.9386	0.0253854	NA	9.05868	0.0272121	0.008	9.19309	0.0242799	0.004	9.02565	0.0529417	0.021
YDR089W		6.52526	0.493171	0.294	6.97568	0.353555	0.241	7.16354	0.0317084	NA	6.67737	0.176609	0.088	7.23546	0.167058	0.111	6.89096	0.209337	0.128	6.55552	0.21942	0.061
YDR090C		5.92357	-0.0620707	NA	6.77649	-0.00407897	NA	6.57261	-0.0199774	NA	6.6221	-0.198546	-0.127	6.52427	-0.00298353	NA	6.54818	-0.0398451	-0.012	6.38371	-0.00938656	NA
YDR091C	RLI1	6.62338	0.0212481	0.003	6.72468	0.000197072	NA	6.6256	-0.00350177	NA	6.66068	-0.082155	-0.037	6.55774	0.0163341	0.003	6.932	0.00643058	NA	7.11922	0.0157674	NA
YDR092W	UBC13	6.48459	0.196013	0.078	6.73747	0.206346	0.13	7.05844	0.013112	NA	7.38945	0.106135	0.069	7.01523	0.100387	0.069	6.87043	0.0894562	0.054	7.0414	0.0269225	NA
YDR094W		6.76277	0.228452	0.063	7.30687	0.0530986	NA	8.18084	0.0349688	NA	7.66791	0.111045	0.056	7.95216	0.263754	0.198	7.63887	0.140953	0.088	7.22672	0.118542	0.017
YDR096W	GIS1	5.07186	0.599245	0.382	5.34752	0.4464	0.286	4.58502	0.133661	NA	4.88749	-0.072053	NA	5.01921	0.376688	0.221	4.83811	0.171977	0.026	4.32187	0.181432	NA
YDR097C	MSH6	6.01699	0.352257	0.198	5.64913	0.37297	0.239	5.69168	0.00556517	NA	6.19788	0.188951	0.117	5.76152	0.115554	0.066	5.94612	0.107667	0.055	5.88727	0.186941	0.06
YDR098C	GRX3	6.50229	0.572907	0.357	6.84458	0.538861	0.41	7.24358	0.0671844	NA	7.38521	0.371485	0.249	7.26614	0.285123	0.196	7.4106	0.104017	0.038	6.72571	0.3391	0.148
YDR098C-B	NA	NA	NA	NA	NA	NA	NA	NA	NA	NA	0.938057	0.71263	0.324	1.67245	0.098944	NA	NA	NA	NA	NA	NA	NA
YDR099W	BMH2	8.14589	0.142819	0.073	8.26667	0.202693	0.136	7.95256	0.0175046	NA	8.26345	0.0829973	0.044	8.1256	0.13889	0.1	8.17444	0.0719301	0.042	7.43808	0.124948	0.034
YDR100W	TVP15	5.92531	0.189455	NA	5.74305	0.314553	0.152	6.31059	-0.0546968	NA	6.39964	0.346584	0.215	6.12861	0.189714	0.091	6.20149	0.300478	0.171	5.71217	0.283324	0.058
YDR103W	STE5	6.17394	0.187766	NA	6.6663	0.148615	0.047	6.54489	0.0694711	NA	6.69387	0.139849	0.043	6.51041	0.24129	0.15	6.52769	0.148336	0.06	6.36148	0.189196	0.028
YDR104C	SPO71	4.32308	0.286343	NA	4.59845	0.213115	0.029	4.89291	0.0783251	NA	4.83842	0.288392	0.121	4.93574	0.135991	0.023	4.56342	0.0540826	NA	4.74886	0.027156	NA
YDR105C	TMS1	6.63716	0.0975251	NA	6.60671	0.115727	0.052	7.00199	0.00172441	NA	7.0802	0.0905466	0.049	7.02688	0.090328	0.059	6.80285	0.100768	0.054	6.66171	0.0260752	NA
YDR107C	TMN2	2.7395	0.0752381	NA	3.40604	-0.0877595	NA	4.1548	0.0160353	NA	4.22243	-0.273924	-0.094	3.72407	0.172113	0.028	3.41658	-0.217938	NA	2.82827	-0.0599425	NA
YDR111C	ALT2	2.60834	-0.397247	-0.165	3.46545	-0.102222	NA	3.77583	-0.172811	NA	3.89576	-0.00265668	NA	3.39285	-0.00661005	NA	3.38654	-0.0324423	NA	2.67729	-0.342976	-0.036
YDR113C	PDS1	5.09594	0.142252	NA	5.71209	0.0154885	NA	6.28769	-0.00446337	NA	6.52744	0.0257559	NA	6.34838	0.0808292	0.046	6.56267	0.0441555	0.015	6.49605	0.0248768	NA
YDR115W		6.75723	0.230592	0.082	6.78718	0.21021	0.094	7.13135	-0.0578367	NA	7.13925	0.332597	0.219	7.01829	0.203206	0.116	7.08614	0.244922	0.145	7.21123	0.360993	0.224
YDR116C	MRPL1	6.31064	0.552743	0.386	6.49913	0.365047	0.264	5.94905	0.0554813	0	6.04381	0.0691849	0.024	6.0901	0.305319	0.221	6.23716	0.0381712	0.008	6.36834	0.0225366	NA
YDR117C	TMA64	5.00775	-0.137095	NA	5.07628	0.00144472	NA	5.30302	-0.0078041	NA	5.29547	0.184484	0.043	5.25087	0.119121	0.013	5.46443	0.136442	0.018	5.13649	-0.217625	-0.039
YDR118W-A		4.10849	0.163891	NA	4.54654	0.265425	0.082	4.7586	0.0563274	NA	4.59814	0.0368279	NA	4.68071	0.22269	0.088	4.76373	-0.0481594	NA	4.2419	0.333035	0.055
YDR120C	TRM1	6.27361	0.40314	0.224	6.17874	0.384126	0.253	6.23116	0.0459991	NA	6.34311	0.27196	0.164	6.33918	0.369046	0.265	6.3121	0.0606228	0.006	6.02248	0.128841	NA
YDR121W	DPB4	6.20718	0.0893326	NA	6.72059	0.028529	NA	7.17825	0.00329941	NA	7.13811	0.0160754	NA	7.13117	0.0360427	0.016	7.14216	0.00111984	NA	6.69862	0.0441162	NA
YDR122W	KIN1	5.62692	0.226684	0.033	6.18441	0.133728	0.046	5.88807	0.00903444	NA	6.1325	0.0867305	0.015	6.09455	0.18335	0.108	6.14624	0.0523455	NA	5.81062	0.140743	NA
YDR127W	ARO1	6.71167	0.293586	0.092	7.17315	0.254674	0.137	7.78064	-0.0124725	NA	7.55937	0.163252	0.06	7.72899	0.291759	0.2	7.4884	0.183097	0.094	6.91907	0.152807	NA
YDR128W	MTC5	6.20127	0.128004	NA	6.30708	0.163255	0.046	6.54251	-0.0139008	NA	6.41155	0.244432	0.122	6.59247	0.0878968	0.017	6.369	0.158837	0.058	6.73285	0.00533857	NA
YDR129C	SAC6	7.81289	0.0836114	0.032	8.09617	0.0713649	0.042	7.89566	0.00621301	NA	8.13481	0.103664	0.068	7.96815	0.061574	0.043	8.02623	0.00337809	NA	7.91799	0.00187041	NA
YDR130C	FIN1	3.92848	-0.115183	NA	4.27982	0.0584213	NA	5.2311	0.0518106	NA	5.09231	0.0550937	NA	4.74991	0.00339749	NA	4.97654	0.062216	NA	4.57553	0.0282558	NA
YDR132C		2.48826	-0.117891	NA	3.57076	0.0661122	NA	4.2857	0.00162278	NA	3.57696	0.215625	NA	3.51914	0.031433	NA	4.02434	0.0499345	NA	2.81314	-0.0806687	NA
YDR133C		11.146	0.0498783	0.03	11.0637	0.0321339	0.019	11.8644	0.00935494	NA	11.9356	0.0558761	0.042	12.3073	0.037007	0.029	11.7094	0.0215425	0.013	11.5032	0.0350347	0.021
YDR137W	RGP1	4.07914	-0.0216909	NA	4.98272	0.274912	0.123	5.28545	-0.00032705	NA	5.19988	0.0985394	0.017	5.11345	0.111018	0.04	5.22526	0.0631284	NA	4.55551	-0.00343737	NA
YDR140W	MTQ2	4.07151	-0.0214015	NA	4.83612	0.0960739	NA	5.32305	-0.0367868	NA	5.2313	0.37899	0.208	5.202	0.116678	0.017	5.32494	0.030797	NA	4.78792	-0.0406162	NA
YDR141C	DOP1	4.88988	0.350205	0.076	5.64454	0.0946635	NA	6.28751	-0.00121775	NA	5.94737	0.335697	0.188	6.25112	-0.0140775	NA	6.22485	0.179596	0.072	5.40504	-0.0233339	NA
YDR142C	PEX7	5.06202	0.192099	NA	5.39286	0.1872	0.037	5.4085	-0.00612864	NA	5.33796	0.0280199	NA	5.44828	0.205593	0.094	5.59663	-0.0584892	NA	4.93749	0.304479	0.034
YDR144C	MKC7	6.39124	0.468822	0.24	6.59711	0.401835	0.262	7.34352	0.0161489	NA	7.39417	0.0488541	NA	7.11677	0.325785	0.236	7.17798	-0.00807261	NA	6.5446	0.202628	0.036
YDR145W	TAF12	7.391	0.398323	0.265	7.29648	0.459387	0.351	6.30747	0.00906696	NA	6.48933	0.280092	0.156	6.4056	0.290714	0.19	6.82106	0.327095	0.208	7.12725	0.384699	0.244
YDR146C	SWI5	5.88124	0.0269389	NA	6.01301	0.0463799	0.022	6.13616	-0.00213238	NA	5.82117	-0.0308555	NA	6.48847	0.00280935	NA	6.4128	0.0150486	NA	5.69409	0.0294216	NA
YDR147W	EKI1	5.90502	0.570668	0.365	6.08513	0.182605	0.084	5.99351	0.0275218	NA	5.80336	0.100239	0.02	6.02502	0.162279	0.093	5.86826	0.0273478	NA	5.84927	0.0192322	NA
YDR148C	KGD2	7.14821	0.305714	0.154	7.36517	0.446243	0.332	7.0629	0.0168763	NA	7.11655	0.323165	0.197	7.09395	0.154357	0.074	7.19809	0.169607	0.079	6.86827	0.311457	0.135
YDR150W	NUM1	5.79686	0.018931	NA	5.94461	0.0199925	NA	6.0779	-0.00469522	NA	5.9489	0.0556516	0.012	6.05439	0.0778402	0.041	5.68251	0.00527345	NA	5.64196	0.0256973	NA
YDR151C	CTH1	6.10557	0.361619	0.21	6.59365	0.163446	0.054	6.0367	0.119382	NA	6.26791	0.0687148	NA	6.415	0.245551	0.152	6.34783	0.0799372	NA	5.8364	0.255371	0.073
YDR152W	GIR2	8.23406	0.14341	0.074	8.2026	0.163461	0.108	8.5112	0.000791401	NA	8.25915	0.0534395	0.026	8.25594	0.0272396	0.011	8.31429	0.0410707	0.02	8.52661	0.0303279	NA
YDR153C	ENT5	6.62506	0.0351474	NA	6.41013	0.0636723	NA	5.86582	-0.0373852	NA	6.05068	0.206567	0.101	5.86515	0.216751	0.128	5.9603	-0.020773	NA	5.68307	0.216912	0.037
YDR154C		11.507	0.0359684	0.024	11.4476	0.0146933	0.009	11.9482	0.000464629	NA	11.9229	0.0219437	0.015	12.0264	0.00630915	0.004	12.0135	-0.00160317	0	12.1909	-0.000895354	NA
YDR161W		5.51932	0.435564	0.192	5.77398	0.474546	0.323	6.08847	0.10377	NA	6.10975	0.395435	0.258	5.93565	0.460459	0.331	5.87768	0.191013	0.087	5.80151	0.15015	NA
YDR164C	SEC1	4.93589	0.0061054	NA	5.1964	0.247985	0.107	5.31526	-0.0195364	NA	5.29519	0.221589	0.1	5.21569	0.155724	0.071	5.43758	0.0586636	NA	4.80891	0.185501	NA
YDR165W	TRM82	5.9516	0.050007	NA	6.53548	0.0161761	NA	6.72612	-0.000609733	NA	6.31771	0.0883424	0.021	6.63563	0.093056	0.047	6.70489	0.0126108	NA	6.64221	0.0310731	NA
YDR166C	SEC5	4.1868	0.0245254	NA	4.99737	0.0347972	NA	4.92505	-0.00380438	NA	4.61479	0.0628732	NA	5.03863	0.127014	0.049	5.0803	0.0787056	NA	4.58528	-0.0351772	NA
YDR168W	CDC37	8.08492	0.0587877	NA	7.87196	0.0853091	0.028	7.59773	0.0239954	NA	7.84427	0.150822	0.082	7.66368	0.27749	0.201	7.84758	0.205686	0.132	8.61427	0.0103009	NA
YDR169C	STB3	6.76967	-0.164482	NA	6.8567	0.00960768	NA	6.72629	-0.0749387	NA	6.79299	-0.162182	-0.052	6.72335	0.0160635	NA	6.86024	-0.0642657	NA	7.19602	-0.450312	-0.312
YDR170C	SEC7	7.00118	0.0813153	NA	6.95218	0.033442	NA	7.39987	0.0139878	NA	7.50035	0.0424008	0.017	7.49615	0.0506408	0.03	7.29962	0.0253394	0.005	7.03947	-0.00972263	NA
YDR171W	HSP42	9.66666	0.0201547	0.008	9.49392	0.0242179	0.014	8.72603	0.00203903	NA	8.80547	0.032608	0.018	9.05116	0.0256225	0.017	9.11589	0.00528561	NA	9.76893	-0.00279786	NA
YDR172W	SUP35	7.58698	0.0488517	NA	7.81148	0.0722961	0.042	7.75199	0.0170355	NA	7.99979	-0.0223623	NA	7.6139	0.0448124	0.02	7.76276	0.0343518	0.005	8.21969	0.0789598	0.041
YDR174W	HMO1	8.22399	0.132149	0.016	8.26163	0.0556078	NA	8.23687	-0.110911	NA	8.38216	0.0473218	NA	8.1818	-0.00283267	NA	8.23723	0.0592526	NA	8.53819	-0.256629	-0.145
YDR175C	RSM24	7.11538	0.488187	0.332	7.30725	0.398824	0.296	7.21902	0.0188873	NA	7.18953	0.135049	0.069	7.25406	0.204159	0.145	7.11875	0.196214	0.123	7.1308	0.25358	0.123
YDR177W	UBC1	7.18306	0.186531	0.047	7.08568	0.146253	0.038	7.10258	-0.00382735	NA	7.26671	-0.0179621	NA	7.07052	0.156798	0.076	7.19191	0.165509	0.071	6.97622	0.121533	NA
YDR178W	SDH4	5.44156	0.248861	0.079	5.51338	0.185468	0.08	5.48702	0.0194294	NA	5.46909	0.145591	0.047	5.74652	0.159437	0.094	5.88284	0.0612427	0.02	5.50993	-0.0247962	NA
YDR179C	CSN9	4.0688	0.222082	NA	3.90263	0.0584439	NA	4.82885	0.0471043	NA	4.5585	0.0740332	NA	5.07266	0.0970784	0.043	5.01681	0.0707746	0.014	4.5945	0.26697	0.04
YDR181C	SAS4	3.66645	0.500339	0.171	4.09461	0.290101	0.078	4.06462	-0.00625197	NA	3.83232	0.217262	0.007	4.21369	0.273084	0.115	4.03538	-0.0250006	NA	3.89587	0.00236023	NA
YDR182W-A		4.19603	0.367855	0.1	4.03984	0.238512	0.059	3.0507	0.0654014	NA	4.10834	0.170478	NA	3.91127	0.138192	NA	3.57213	-0.0455073	NA	3.67594	0.158217	NA
YDR183C-A		4.83902	0.153931	NA	4.96944	-0.0261313	NA	4.70463	0.00788137	NA	4.53243	0.382019	0.208	4.9438	0.202954	0.111	4.95739	0.0128815	NA	4.70995	0.0741105	NA
YDR183W	PLP1	5.44868	0.778267	0.597	5.74284	0.614303	0.476	5.65237	0.0153108	NA	5.61124	0.311811	0.179	5.61047	0.321644	0.213	5.77624	0.247109	0.134	5.26336	0.632848	0.38
YDR185C	UPS3	3.03499	0.253241	NA	3.84291	0.250706	0.042	3.5945	-0.0110199	NA	4.07502	0.178468	NA	3.5752	0.234077	0.06	3.59993	0.141365	NA	3.18524	0.0592269	NA
YDR188W	CCT6	6.66039	0.0754768	NA	6.96699	0.086243	0.031	6.72637	-0.0118817	NA	7.15889	0.199395	0.122	6.75162	0.154595	0.093	6.83708	0.00709523	NA	6.72231	-0.0695995	NA
YDR190C	RVB1	7.03571	-0.0598252	NA	7.20082	-0.194974	-0.12	7.6279	-0.0495644	NA	7.95756	0.283886	0.177	7.64864	0.0758621	0.018	7.59947	-0.0909226	-0.033	7.17997	0.130477	NA
YDR196C	CAB5	5.04821	0.446225	0.133	5.52785	0.272128	0.122	6.33515	0.0428179	NA	6.17376	0.151726	0.067	6.42279	0.122468	0.069	6.08354	0.330884	0.207	5.88596	0.2632	0.075
YDR197W	CBS2	5.21879	0.634328	0.435	5.37984	0.611891	0.469	4.97233	0.136943	NA	4.76391	0.188877	0.022	5.02789	0.448518	0.284	5.08798	0.256467	0.091	4.84199	0.51502	0.284
YDR198C	RKM2	4.69726	0.492233	0.213	5.02893	0.254413	0.085	5.29277	-0.0308428	NA	5.24711	0.107629	NA	4.93618	0.183608	0.065	5.08936	-0.0283302	NA	4.82013	0.0844363	NA
YDR201W	SPC19	2.92049	-0.448322	-0.179	3.59049	-0.0290278	NA	4.38637	-0.0592602	NA	3.8673	0.125631	NA	4.26804	0.0794945	NA	4.05253	0.132079	NA	3.13848	-0.151903	NA
YDR202C	RAV2	5.30373	0.00897333	NA	5.68638	0.0395974	NA	5.0359	0.0165348	NA	4.93518	0.0975693	0.023	5.27493	0.0145826	NA	5.08533	-0.00360097	NA	4.86233	0.0282287	NA
YDR206W	EBS1	4.4404	0.339889	0.1	4.45053	0.440598	0.255	3.76215	-0.0451479	NA	4.03255	0.213515	0.049	3.858	0.456301	0.256	3.74625	0.167074	NA	4.06829	0.0838577	NA
YDR210W		6.12974	0.0077782	NA	5.95839	0.11053	NA	7.11773	-0.021226	NA	5.77339	0.170772	0.045	6.20739	0.0402319	NA	6.56277	0.16299	0.064	5.43945	0.167606	NA
YDR211W	GCD6	5.67148	0.0557803	NA	5.9199	0.020517	NA	5.79599	-0.00477575	NA	5.97087	0.0036468	NA	5.72887	0.0404487	NA	6.0002	-0.00984072	NA	5.61603	0.0296146	NA
YDR212W	TCP1	6.69589	0.000309565	NA	6.88624	-0.00308091	NA	6.72589	0.000440106	NA	6.94677	0.0215826	NA	6.58273	0.0490443	0.021	6.80763	-0.0043131	NA	6.66899	-0.00546072	NA
YDR213W	UPC2	4.15541	-0.426043	-0.18	3.84555	-0.27553	-0.072	3.37747	-0.169796	NA	4.09596	-0.214547	-0.033	3.49687	-0.00947793	NA	3.24677	-0.127853	NA	4.02043	-0.419879	-0.154
YDR214W	AHA1	9.54472	-0.00167255	NA	9.75901	0.0344748	NA	11.0942	-0.0511866	NA	10.2686	-0.219995	-0.117	11.2242	0.0256349	NA	10.9357	0.0125775	NA	10.7564	-0.111187	-0.019
YDR217C	RAD9	6.61949	0.218247	0.08	6.96926	0.0278773	NA	7.34903	0.00271482	NA	7.04312	0.0938951	0.044	7.31139	0.0866018	0.053	7.19632	0.00751802	NA	6.91887	0.0617827	NA
YDR221W	GTB1	2.11362	-0.0361316	NA	3.98691	0.00772388	NA	4.53535	0.0503885	NA	4.88589	0.104075	NA	4.03414	0.0357135	NA	4.42403	-0.0657541	NA	4.04408	0.0776327	NA
YDR224C	HTB1	10.2091	0.0671327	0.044	10.2879	0.00758254	0.003	9.7969	0.00256534	NA	10.0604	0.022508	0.014	9.89531	0.0292385	0.022	10.4661	0.000636902	NA	10.8979	0.00303519	NA
YDR225W	HTA1	9.21698	0.0454757	0.009	9.40523	0.0237082	NA	9.27217	-0.0493315	NA	9.39098	0.0417468	0.02	9.33036	0.00880952	NA	9.47395	0.054961	0.036	9.37688	0.0255636	NA
YDR226W	ADK1	8.86952	0.359147	0.266	8.58457	0.142366	0.095	9.18749	0.00981419	NA	8.8872	0.29468	0.217	9.01421	0.154441	0.122	8.82438	0.110967	0.08	8.47795	0.0790108	0.029
YDR227W	SIR4	5.5846	-0.00864466	NA	5.45542	0.00889484	NA	5.28093	-0.0164795	NA	6.18267	-0.0225722	NA	5.26539	0.0097161	NA	5.02758	-0.0341794	NA	5.40422	-0.11041	NA
YDR228C	PCF11	6.13831	0.327475	0.178	5.87743	0.46421	0.333	5.46777	0.0716042	NA	5.54208	0.163837	0.072	5.54424	0.389382	0.27	5.83683	0.0282238	NA	5.68536	0.247143	0.085
YDR231C	COX20	6.32967	0.142125	NA	6.43478	0.164856	0.053	6.84401	-0.0125175	NA	6.80726	0.0381128	NA	6.87158	0.116518	0.049	6.87967	0.105935	0.036	6.49615	0.0948725	NA
YDR232W	HEM1	6.18572	0.674885	0.532	6.36444	0.533512	0.407	6.31538	0.127668	NA	6.80405	0.53119	0.406	6.53852	0.476821	0.354	6.49521	0.222356	0.107	6.19263	0.500388	0.303
YDR233C	RTN1	9.81633	0.533015	0.427	9.95899	0.339142	0.261	10.0712	0.0193953	0.001	9.91319	0.241083	0.174	10.0976	0.099009	0.077	9.94102	0.0613979	0.044	9.60692	0.160751	0.1
YDR235W	PRP42	4.96293	0.180755	NA	5.60596	0.169092	0.066	5.82453	0.00903517	NA	5.54282	0.155289	0.062	5.64991	0.0691802	0.02	5.71552	0.0160751	NA	5.3836	0.0379926	NA
YDR237W	MRPL7	6.19741	0.81413	0.672	6.46604	0.706511	0.589	6.69337	0.0164651	NA	6.25289	0.340481	0.214	6.48852	0.329445	0.233	6.43568	0.209415	0.12	6.25028	0.245729	0.08
YDR238C	SEC26	7.26899	0.0477673	NA	7.3054	0.0550114	NA	8.05187	0.000436876	NA	7.84912	0.00327372	NA	8.00119	0.205595	0.133	8.10703	-0.129932	-0.059	7.44171	0.163388	0.015
YDR242W	AMD2	2.79376	-0.280336	NA	4.16733	0.0477893	NA	4.13873	-0.156768	NA	4.14935	-0.178317	NA	3.7292	0.170937	NA	4.12127	-0.156309	NA	3.32088	-0.114043	NA
YDR243C	PRP28	0.79559	0.181617	NA	1.99477	-0.0148332	NA	2.52307	0.20342	NA	2.65419	0.231272	NA	1.86791	0.223256	NA	2.69115	-0.0175841	NA	1.52355	0.502381	0.048
YDR244W	PEX5	4.98693	0.424687	0.205	5.65617	0.467093	0.339	4.97893	0.0635543	NA	5.04154	0.102549	NA	5.06363	0.326081	0.205	5.12779	0.161639	0.036	4.75743	0.264309	0.066
YDR245W	MNN10	5.95005	0.0312992	NA	NA	NA	NA	NA	NA	NA	6.3047	0.0480193	0.015	6.47781	0.0249724	0.009	6.4513	0.0185637	0	6.03355	0.0579759	NA
YDR246W	TRS23	5.46573	0.140215	NA	6.04609	0.139372	0.054	6.38552	0.0454364	NA	5.94127	0.0101219	NA	6.42251	0.0519676	NA	6.27048	0.0314544	NA	6.15075	0.0591319	NA
YDR248C		5.98043	0.0582631	NA	6.04706	0.0984817	0.03	6.92562	0.000225779	NA	6.41963	0.0494183	0.015	6.81516	0.0218295	0.006	6.47272	0.0513489	0.02	6.23765	0.00902509	NA
YDR249C		3.67233	0.448756	0.115	4.75937	0.435532	0.268	4.14336	0.0619069	NA	4.46697	0.0822204	NA	4.08876	0.275064	0.133	4.09842	0.0463556	NA	3.96162	0.206949	NA
YDR259C	YAP6	3.77788	0.522627	0.277	4.92013	0.278199	0.109	4.91231	-0.0244334	NA	4.36446	0.0342955	NA	4.55755	0.161674	0.032	4.58742	0.0995714	NA	4.36807	0.468158	0.203
YDR260C	SWM1	4.31133	-0.242271	NA	5.23181	-0.0719321	NA	5.37577	-0.039105	NA	5.66555	-0.0957903	NA	5.01479	0.111823	NA	5.13411	-0.0975974	NA	5.09601	-0.0248326	NA
YDR261C	EXG2	7.32221	0.203464	0.085	7.4544	0.0903656	0.035	7.94612	0.000761351	NA	7.71838	0.162068	0.097	7.93619	0.0682669	0.039	7.75922	0.114321	0.068	7.55282	0.0641214	NA
YDR262W		5.6342	0.0322699	NA	6.17934	0.0127425	NA	5.72427	0.00130406	NA	6.18604	0.040952	NA	6.09217	0.0907177	0.041	6.15126	-0.00888884	NA	6.11783	-0.00717451	NA
YDR263C	DIN7	4.38647	0.254228	NA	5.07124	0.0848914	NA	4.69216	-0.0137644	NA	5.22941	-0.264982	-0.118	5.09336	0.0707024	NA	4.89638	-0.00899488	NA	4.55967	0.129964	NA
YDR264C	AKR1	5.72936	-0.0255103	NA	6.36933	-0.00193994	NA	6.76469	0.00689494	NA	6.7575	-0.0936879	-0.045	6.76503	0.00844406	NA	6.8298	-0.00277409	NA	6.4093	-0.0515061	NA
YDR267C	CIA1	4.30713	-0.0622411	NA	4.68871	0.161608	NA	4.5152	-0.134022	NA	4.7909	0.0343547	NA	4.35524	0.204111	0.055	4.75141	0.111564	NA	4.5883	0.160438	NA
YDR272W	GLO2	5.56608	-0.0131062	NA	6.00419	0.0977712	NA	6.75372	-0.0249335	NA	6.30012	-0.0222943	NA	6.56755	0.0340744	NA	6.79221	-0.0742815	-0.007	5.90427	-0.0234973	NA
YDR273W	DON1	4.36923	0.536129	0.278	5.05927	0.250772	0.093	4.655	0.0641158	NA	5.70898	0.0350642	NA	5.12759	0.132967	0.024	4.19331	0.201493	0.024	4.70529	0.0775282	NA
YDR275W	BSC2	6.99339	-0.00780551	NA	6.95308	-0.00460309	NA	6.8331	-4.24954e-05	NA	6.82237	-0.0705699	-0.033	6.83806	-0.0058115	NA	6.78157	-0.00375013	NA	6.75357	0.00267941	NA
YDR276C	PMP3	8.2208	0.0436711	NA	8.28855	-0.0266483	NA	8.67579	0.0286431	NA	8.04474	0.0482558	NA	8.59029	0.152813	0.095	8.54812	-0.0446442	-0.01	8.06503	0.022394	NA
YDR277C	MTH1	5.8441	0.135603	NA	6.34308	0.0460178	NA	6.81434	0.0364941	NA	6.68078	0.0357109	NA	6.83535	0.0262989	NA	6.8002	0.0262569	NA	6.03528	0.00446529	NA
YDR279W	RNH202	3.87793	-0.0245586	NA	4.62278	0.0210239	NA	5.05333	-0.0108901	NA	5.31627	0.0793	NA	4.59518	0.0291757	NA	5.36138	0.0398	NA	4.46497	0.028551	NA
YDR280W	RRP45	4.51413	0.0975963	NA	5.4667	0.0416252	NA	5.69258	0.00896866	NA	5.64029	0.0902783	0.027	5.48139	0.0190104	NA	5.77517	0.0515274	NA	5.46824	0.0308914	NA
YDR281C	PHM6	3.55577	0.139364	NA	4.50478	0.0837453	NA	3.05297	0.131255	NA	2.23935	-0.0910827	NA	2.00929	0.287374	0.118	3.31135	-0.120339	NA	3.3374	0.291917	0.081
YDR282C		4.68092	0.647009	0.421	4.72518	0.195345	NA	5.26272	0.0403187	NA	5.30886	0.184262	0.049	5.24264	0.251522	0.128	5.12509	-0.0430806	NA	4.35929	0.043017	NA
YDR283C	GCN2	6.09195	0.507106	0.291	6.54702	0.422615	0.289	6.86327	0.100093	NA	6.71108	0.293759	0.168	6.861	0.288322	0.191	6.52709	0.290114	0.161	6.27938	0.334053	0.124
YDR284C	DPP1	6.72742	0.256038	0.149	6.96622	0.220283	0.153	6.69518	-0.000696921	NA	6.53224	0.205216	0.132	6.72536	0.0483341	0.027	6.60155	0.010137	NA	6.2464	0.0256247	NA
YDR286C		3.25484	0.0978871	NA	4.07415	0.0958983	NA	4.11411	0.0120987	NA	3.94783	0.193266	0.029	4.01941	0.196861	0.064	4.25154	0.0266674	NA	4.10264	-0.104499	NA
YDR287W	INM2	5.28632	0.0388706	NA	5.74762	-0.00708679	NA	6.62724	0.0017044	NA	6.77938	0.0209156	NA	6.31447	0.0108405	NA	6.37933	0.0148844	NA	6.0171	-0.00269323	NA
YDR288W	NSE3	4.83319	0.155527	NA	5.24868	0.133613	0.041	5.54133	0.0208992	NA	5.49485	0.0733725	0.018	5.4819	0.120764	0.064	5.33939	0.0220827	NA	4.99583	0.00216303	NA
YDR289C	RTT103	5.67431	0.332388	0.112	6.34814	0.181711	0.068	5.84962	0.00339022	NA	6.14109	0.101577	NA	5.92815	0.147922	0.06	6.04451	0.037503	NA	5.75359	0.0896656	NA
YDR291W	HRQ1	3.08336	0.121616	NA	4.10128	0.152897	NA	4.03197	-0.012831	NA	3.74411	0.0658266	NA	3.98431	0.123046	NA	3.97921	0.0161213	NA	3.56082	0.312738	0.086
YDR292C	SRP101	5.87997	0.0618366	NA	6.39454	0.0686604	0.005	6.84113	0.0027562	NA	6.69084	0.0320353	NA	6.68724	0.0354261	0.007	6.70781	0.0734598	0.024	6.2111	0.108784	NA
YDR293C	SSD1	6.9602	-0.0609902	NA	7.13927	0.0186122	NA	6.68341	-0.00257256	NA	6.92091	-0.0589267	NA	6.83591	0.040996	NA	6.7247	0.0515601	NA	6.71693	0.223078	0.076
YDR294C	DPL1	8.63309	0.0376422	0.012	8.91337	0.0214271	0.011	8.84016	0.00341492	NA	8.89215	0.00532813	0.001	8.94065	0.015768	0.01	8.85399	0.00016167	NA	NA	NA	NA
YDR295C	HDA2	5.96644	0.162909	0.035	6.39063	0.186083	0.105	5.69836	0.0266984	NA	5.64342	0.0888552	0.016	5.83715	0.113749	0.056	5.91573	0.0210288	NA	5.69439	0.0996314	NA
YDR296W	MHR1	6.0879	0.126917	NA	6.33699	-0.0547455	NA	6.95056	0.0247662	NA	6.97066	0.0890701	NA	7.01754	0.274755	0.18	6.98246	0.0589903	NA	6.70868	0.0361922	NA
YDR297W	SUR2	6.79717	0.0501209	NA	6.55921	0.0199941	NA	NA	NA	NA	7.49733	0.0401124	0.021	7.26555	0.0327499	0.018	7.50197	0.0104898	0.002	NA	NA	NA
YDR298C	ATP5	9.15364	0.0620796	0.033	9.13577	0.0820092	0.056	8.74847	0.00280574	NA	8.65241	0.092211	0.061	8.85961	0.0582917	0.043	8.75263	0.0075823	0.001	8.82483	0.0473831	0.019
YDR299W	BFR2	6.98524	0.235755	0.101	7.34863	0.166346	0.094	7.90195	0.0063202	NA	7.83485	0.153086	0.097	7.56759	0.16304	0.116	7.69449	0.0759647	0.04	7.37434	0.125473	0.038
YDR300C	PRO1	5.97139	0.215895	0.067	6.03649	0.295344	0.181	6.04191	0.00676096	NA	6.09591	0.219601	0.125	6.05207	0.193544	0.123	6.15844	0.0357894	NA	5.82853	0.053496	NA
YDR301W	CFT1	5.82819	0.00685424	NA	6.33353	0.0223438	NA	5.93725	0.00512633	NA	5.63948	0.0248524	NA	6.01067	0.0801866	0.041	5.91541	0.0146691	NA	5.56865	0.0735684	NA
YDR302W	GPI11	5.14136	0.803543	0.611	5.17558	0.696379	0.544	5.69263	0.0691042	NA	5.64937	0.40879	0.279	5.48785	0.48235	0.353	5.43397	0.264773	0.154	4.82344	0.548466	0.263
YDR303C	RSC3	5.3421	0.382019	0.154	5.83232	0.22538	0.121	5.89094	0.0498825	NA	5.84643	0.412927	0.285	6.0437	0.164115	0.109	5.99367	0.181144	0.109	5.54501	0.109719	NA
YDR304C	CPR5	9.50899	0.00542748	NA	9.52824	0.00675102	0.002	9.41577	0.000431102	NA	9.59391	0.00201325	NA	9.41727	0.00617608	0.003	9.5139	-0.000567788	NA	9.70884	-0.000730603	NA
YDR305C	HNT2	5.57305	0.238995	0.047	5.75446	0.202717	0.086	6.02213	-0.0371364	NA	5.49306	0.0778817	NA	5.94192	0.0371602	NA	5.70358	0.0683471	NA	5.41028	0.0444375	NA
YDR306C		3.37136	-0.303673	-0.03	4.32916	0.05017	NA	4.52534	-0.00936547	NA	4.37736	0.0903244	NA	4.03607	0.0917587	NA	4.45538	-0.107881	NA	3.24406	-0.309045	-0.02
YDR309C	GIC2	6.2105	-0.339528	-0.134	6.20167	-0.179116	-0.056	6.43228	-0.111975	NA	7.2125	-0.126914	-0.038	6.6773	0.00264487	NA	6.72683	-0.0997312	-0.022	6.76709	-0.46526	-0.286
YDR310C	SUM1	6.39298	-0.308055	-0.132	6.81201	-0.0464336	NA	7.05353	-0.0686425	NA	7.05832	-0.0625998	NA	6.95966	-0.000866931	NA	6.88088	0.207113	0.106	7.62939	-0.466622	-0.329
YDR311W	TFB1	4.76408	0.120373	NA	5.14519	0.0319313	NA	4.48816	0.022026	NA	NA	NA	NA	4.58502	0.188361	0.1	4.78802	0.0127911	NA	NA	NA	NA
YDR312W	SSF2	6.21276	0.268449	0.156	6.19162	0.226399	0.135	6.27496	0.0808008	NA	6.39262	0.19089	0.099	6.21026	0.195323	0.12	6.46446	0.208782	0.122	6.40846	0.256197	0.144
YDR313C	PIB1	4.1538	0.0631141	NA	4.66816	0.127768	0.033	3.86609	-0.0028869	NA	4.19062	-0.102104	NA	4.10486	0.00217634	NA	4.20527	0.107876	NA	4.50836	0.104201	NA
YDR314C	RAD34	1.30661	-0.0161292	NA	1.82899	0.109041	NA	1.82138	0.0646045	NA	3.52803	0.147339	NA	0.93088	0.119177	NA	2.30371	-0.155603	NA	2.29498	-0.135961	NA
YDR316W	OMS1	6.25267	-0.00780779	NA	6.56184	0.00206997	NA	5.9401	0.000505558	NA	5.93296	-0.0169108	NA	6.05031	0.00907987	NA	6.0756	0.00321288	NA	5.65312	-0.0243477	NA
YDR317W	HIM1	3.98208	0.219333	NA	4.28957	0.333235	0.127	4.39967	-0.0499889	NA	3.8473	0.0464279	NA	4.46296	0.263558	0.118	4.19118	0.0211147	NA	3.05286	0.493873	0.079
YDR319C	YFT2	3.60382	-0.0166307	NA	4.48821	0.0109638	NA	4.67209	0.0452871	NA	4.79605	0.182429	0.066	4.37426	0.0263435	NA	4.4576	0.0470245	NA	3.88862	0.0945058	NA
YDR320C	SWA2	6.80977	0.0149938	NA	7.13096	0.00597124	NA	7.68672	0.000151465	NA	7.34872	0.0173937	0.002	7.38302	0.00687026	NA	7.83195	0.011039	0.001	7.26089	0.0030094	NA
YDR321W	ASP1	6.24642	0.507078	0.282	6.2433	0.500542	0.349	7.21695	0.0443759	NA	6.87157	0.415612	0.293	6.96125	0.1667	0.113	6.8341	0.127029	0.066	6.62157	0.00847444	NA
YDR322C-A	TIM11	7.55879	0.087187	0.024	7.75447	0.114647	0.068	7.29931	0.0122095	NA	7.15201	0.0633291	0.003	7.41031	0.0883594	0.056	7.43055	0.0150458	NA	7.22216	-0.0174076	NA
YDR322W	MRPL35	7.11157	0.0598841	0.01	7.434	0.0372758	0.014	6.83971	-0.00727587	NA	6.5313	0.0487838	0.015	6.79474	0.0241768	0.006	6.77784	0.0159266	NA	6.41998	0.0199584	NA
YDR325W	YCG1	3.90591	0.111503	NA	4.73287	0.111866	NA	5.09989	0.0235336	NA	4.88749	-0.0118471	NA	5.26255	0.31756	0.184	4.87318	-0.118711	NA	4.30628	0.0435285	NA
YDR326C	YSP2	5.37746	0.0522644	NA	5.55297	0.0596568	0.008	5.29548	-0.000881425	NA	5.35486	-0.0407966	NA	5.3686	0.023183	NA	5.17963	0.0694329	0.01	4.93233	0.0684393	NA
YDR328C	SKP1	8.82245	0.0957498	0.039	8.51241	0.0996986	0.06	9.03063	0.00296952	NA	9.27677	0.0436139	0.024	9.17117	0.0303433	0.018	8.87651	0.0354928	0.019	8.7785	0.0194303	NA
YDR331W	GPI8	5.98045	0.0479926	NA	6.28939	0.0558392	0.015	6.03597	0.0120471	NA	6.06883	-0.0930382	-0.021	6.14776	0.0719765	0.04	6.07575	0.00744821	NA	6.28464	0.0577131	NA
YDR332W	IRC3	4.62625	0.287226	0.012	5.22122	0.124798	0.003	4.98323	-0.00110939	NA	4.63249	0.1248	NA	5.17747	0.155399	0.068	4.82097	0.0351806	NA	4.57362	0.113123	NA
YDR333C	RQC1	6.95632	0.142446	0.06	7.2332	0.134425	0.082	6.72218	0.000503221	NA	6.53105	0.208135	0.127	6.90836	0.0615534	0.034	6.83286	0.0262424	NA	6.86102	-0.00742095	NA
YDR335W	MSN5	6.90567	0.0994055	NA	7.17339	0.13209	0.069	7.21045	-0.0128979	NA	7.06182	0.0554021	0.012	7.11118	0.061241	0.029	7.14931	0.0287597	NA	7.05057	0.0373452	NA
YDR336W		4.55996	0.00715531	NA	4.61725	0.0331992	NA	4.40401	0.0331759	NA	4.36674	-0.291607	-0.12	4.4851	-0.0034132	NA	4.04612	0.0685364	NA	3.8147	0.0744465	NA
YDR337W	MRPS28	5.21736	0.181077	NA	5.60727	0.198078	0.09	5.61031	0.0100488	NA	5.72788	0.120727	0.045	5.74311	0.0955773	0.042	5.96878	0.0588447	0.008	5.48832	0.105228	NA
YDR338C		5.06232	0.250992	0.062	5.27445	0.115515	0.012	4.72661	-0.0148711	NA	4.84372	0.318122	0.162	4.84357	0.184581	0.079	4.68757	0.159523	0.036	4.76323	-0.0050045	NA
YDR339C	FCF1	5.5024	0.476731	0.235	6.01165	0.295359	0.162	6.08558	0.0727776	NA	5.88993	0.12388	0.021	6.11394	0.245901	0.151	6.01779	0.156506	0.06	5.86951	0.28724	0.087
YDR341C		9.80762	0.0122052	NA	9.50096	0.0303928	0.008	10.1977	0.0123138	NA	10.1188	0.0357233	0.014	10.27	0.0339111	0.019	10.0799	0.0169039	NA	10.0075	0.0278856	NA
YDR343C	HXT6	5.11745	0.036775	NA	4.36693	0.222309	0.054	4.13417	0.146244	NA	4.36987	0.130363	NA	4.39335	0.374705	0.218	5.23289	0.253681	0.121	4.31807	0.213166	NA
YDR345C	NA	NA	NA	NA	7.66558	0.00756234	NA	7.69968	0.000414089	NA	7.7781	0.0206176	0.007	7.66924	0.0162932	0.007	7.97149	0.00351976	NA	NA	NA	NA
YDR346C	SVF1	8.43402	-0.0176538	NA	8.63344	-0.021444	NA	9.19832	-0.0012942	NA	8.793	-0.111104	-0.071	9.24681	0.0196557	0.01	8.87775	-0.0274416	-0.01	9.1303	0.021684	0.004
YDR347W	NA	NA	NA	NA	NA	NA	NA	NA	NA	NA	5.59568	0.0333759	NA	6.02862	0.0156585	NA	6.37227	0.00720935	NA	NA	NA	NA
YDR348C	PAL1	5.61171	0.0906109	NA	6.11372	0.0294431	NA	6.29544	0.0204764	NA	6.00562	0.0648146	0.009	6.16385	0.0125929	NA	6.44981	0.0312879	NA	6.13417	-0.0198771	NA
YDR349C	YPS7	6.22664	0.331211	0.144	6.45973	0.10186	NA	6.54676	0.0835338	NA	6.78664	0.0887761	NA	6.80888	0.323713	0.22	6.50006	0.111009	0.022	6.26632	0.212311	0.036
YDR353W	TRR1	8.55537	0.116716	0.049	8.74625	0.150609	0.094	8.86957	0.00594751	NA	9.14734	0.180617	0.121	8.93192	0.133388	0.096	8.80306	0.0821371	0.051	8.30378	0.0910791	0.023
YDR354W	TRP4	7.06301	0.168953	0.066	6.93657	0.232722	0.142	7.40137	0.0347774	NA	7.5465	0.108347	0.062	7.3244	0.152798	0.108	7.31653	0.0286711	NA	6.72869	0.0356573	NA
YDR356W	SPC110	5.22086	-0.365263	-0.096	5.5091	-0.160142	-0.029	5.86633	-0.0619314	NA	5.9835	-0.10754	-0.027	5.8802	0.0211264	NA	5.93287	-0.0438779	NA	5.18469	-0.148833	NA
YDR359C	EAF1	4.44903	0.0508644	NA	4.91001	0.131076	NA	4.96735	-0.0027851	NA	4.5445	0.0136308	NA	4.82302	0.00715331	NA	4.7714	-0.0286882	NA	4.24872	-0.156728	NA
YDR361C	BCP1	5.73644	0.149755	NA	6.17318	0.0599176	NA	6.9191	-0.0563602	NA	6.96927	-0.027771	NA	6.81649	0.100599	0.039	6.47661	0.0701231	NA	6.31884	0.0595369	NA
YDR362C	TFC6	4.17742	0.26165	NA	5.02004	0.111083	NA	5.1616	0.0911095	NA	4.93769	0.0468719	NA	5.0322	0.273241	0.148	5.01811	-0.0219184	NA	4.66516	0.159492	NA
YDR363W	ESC2	1.6442	0.0677516	NA	3.13097	0.0155931	NA	3.01746	-0.0885828	NA	3.81518	0.0627773	NA	2.52661	-0.0364107	NA	3.16897	0.0314237	NA	2.41999	-0.306967	NA
YDR363W-A	SEM1	7.29632	0.131435	NA	7.5588	0.116587	0.024	8.09534	0.0160352	NA	7.59651	0.0530778	NA	7.90627	0.0135903	NA	7.5248	0.146221	0.06	7.0985	0.0460174	NA
YDR364C	CDC40	0.951655	-0.00609685	NA	2.5519	-0.117292	NA	2.25112	-0.132032	NA	2.90875	-0.229611	NA	1.9024	-0.184366	NA	2.53114	-0.304674	-0.003	1.59888	-0.100611	NA
YDR365C	ESF1	5.63714	-0.00474981	NA	5.49246	0.0555413	NA	5.84918	-0.0247259	NA	6.42907	0.00486021	NA	5.76048	-0.0146512	NA	5.94475	-0.00762088	NA	5.4211	0.0150163	NA
YDR365W-B		4.82113	0.122522	NA	4.24495	0.060913	NA	3.41218	0.127354	NA	4.22202	0.0143081	NA	3.78954	0.0822745	NA	4.00346	0.167452	NA	4.92555	0.00499478	NA
YDR367W	KEI1	6.08334	0.720227	0.531	6.14876	0.561339	0.417	6.65485	0.0609436	NA	6.46938	0.275154	0.168	6.61356	0.425486	0.318	6.50604	0.100648	0.039	6.08877	0.182697	0.027
YDR371W	CTS2	5.36571	0.125774	0.024	5.29057	0.0727535	0.019	NA	NA	NA	4.91194	0.124573	0.048	4.84993	0.143051	0.077	4.99752	0.0176605	NA	NA	NA	NA
YDR372C	VPS74	7.41124	0.0265053	NA	7.4024	-0.0247329	NA	7.35169	-0.0172643	NA	7.50124	-0.00305208	NA	7.43679	0.0824476	0.042	7.48706	-0.022956	NA	7.80068	-0.0384286	NA
YDR373W	FRQ1	5.92608	-0.00735898	NA	5.43802	-0.0218584	NA	5.03281	0.00320806	NA	4.97113	0.308573	0.172	5.32292	0.0843117	0.036	5.32232	0.0314471	NA	5.4653	-0.0120087	NA
YDR374W-A	WIP1	4.86664	0.019611	NA	5.25621	0.074799	NA	6.44403	-0.0116159	NA	5.75807	0.0879483	0.014	6.09888	0.0308757	NA	5.91671	0.0960486	0.022	5.14193	0.00795193	NA
YDR376W	ARH1	5.45496	0.0165504	NA	5.87944	0.006357	NA	6.34946	0.00378554	NA	6.18538	0.0207925	NA	6.19829	0.0568641	0.013	6.20643	-0.0115036	NA	5.75985	0.128819	NA
YDR377W	ATP17	5.14116	0.0298398	NA	5.67322	0.0328837	NA	6.40387	-0.0319686	NA	6.22882	-0.0351328	NA	6.17977	-0.063253	NA	6.22288	0.0460279	NA	5.8574	-0.0734925	NA
YDR378C	LSM6	5.82329	0.378688	0.182	6.18182	0.0761611	NA	7.00473	0.0176236	NA	6.50151	0.254881	0.143	6.91057	0.0699604	0.016	6.68731	0.0606717	NA	6.21449	0.0922678	NA
YDR379C-A	SDH6	4.63538	0.0514933	NA	4.41042	0.0648097	NA	4.32742	-0.0286268	NA	3.99778	-0.125929	NA	4.37761	0.0768825	NA	4.638	-0.0791137	NA	4.27694	-0.0444527	NA
YDR380W	ARO10	7.28841	0.0588577	0.015	6.51568	0.0775808	0.029	NA	NA	NA	5.26298	0.041366	NA	6.39154	0.148824	0.099	6.55923	0.0153062	NA	5.97355	0.0203819	NA
YDR381C-A		4.92858	0.607284	0.365	4.85076	0.291025	0.133	4.96456	0.0203158	NA	4.9811	0.127437	0.029	4.76094	0.20595	0.1	4.68476	0.261757	0.113	4.69586	0.495907	0.215
YDR381W	YRA1	7.42687	0.244358	0.101	7.59204	0.303418	0.195	7.42926	0.0508944	NA	7.6703	0.355383	0.239	7.71914	0.350013	0.257	7.36299	0.0525962	NA	7.13752	0.381141	0.214
YDR382W	RPP2B	9.75353	0.0323263	NA	9.85071	0.0440654	NA	9.89517	-0.0367284	NA	9.75219	0.103547	0.059	9.83632	0.0139189	NA	9.91149	0.109089	0.07	9.94598	0.0839411	0.034
YDR384C	ATO3	4.36576	0.177095	NA	5.60792	0.0725175	NA	5.8361	0.0220344	NA	6.42598	0.0194767	NA	6.00956	0.0531743	0.008	5.62158	-0.0580342	NA	4.7636	0.248355	NA
YDR385W	EFT2	8.68011	0.0755706	NA	8.62435	0.197532	0.129	9.01325	-0.0292823	NA	9.10782	0.0983004	0.054	9.11614	0.146332	0.107	9.09871	0.0662369	0.033	8.78889	0.0649178	NA
YDR386W	MUS81	4.33992	-0.00745696	NA	4.7862	-0.00787757	NA	4.5515	-0.0209328	NA	4.72446	-0.00866596	NA	4.31195	0.043167	NA	4.59643	0.0256149	NA	4.30366	0.0071392	NA
YDR388W	RVS167	7.85264	0.0099953	NA	NA	NA	NA	NA	NA	NA	8.04997	0.0034783	NA	7.7183	0.0119697	0.004	NA	NA	NA	NA	NA	NA
YDR389W	SAC7	4.76328	0.286634	0.143	5.6739	-0.000133089	NA	6.11894	0.0373147	NA	5.8053	0.0123464	NA	5.868	0.137718	0.054	5.93542	0.00707297	NA	5.03323	-0.0553989	NA
YDR390C	UBA2	5.26873	0.45482	0.181	5.63759	0.256371	0.114	6.26612	0.0117334	NA	5.84601	0.288126	0.155	6.18092	0.149404	0.077	6.2603	0.0719981	0.007	5.87898	0.189842	0.019
YDR391C		4.58458	0.338447	NA	5.2601	0.142004	0.025	5.3793	-0.0365142	NA	5.44488	0.00434782	NA	5.17192	-0.0278138	NA	5.40792	0.0479282	NA	5.1144	-0.134345	NA
YDR394W	RPT3	8.83201	0.218492	0.153	8.99303	0.0702398	0.047	8.10484	0.0163459	NA	8.31892	0.0553015	0.033	8.15014	0.0989955	0.073	8.47814	0.0173593	0.006	8.4271	0.0371865	0.01
YDR397C	NCB2	7.38232	-0.105978	-0.038	7.62092	0.0333659	NA	7.54596	-0.0384439	NA	7.39885	-0.0332036	NA	7.66884	-0.0725589	-0.035	7.03195	0.0896866	NA	8.20336	-0.120566	-0.064
YDR398W	UTP5	8.09668	0.0133044	NA	7.76457	0.0598839	0.029	7.7513	-5.23273e-05	NA	7.88717	0.0314866	0.012	7.63073	0.0286853	0.011	7.61754	0.00626552	NA	8.87501	-0.0109722	NA
YDR399W	HPT1	6.13709	0.054315	NA	6.43367	0.0128462	NA	6.40252	-0.00629597	NA	6.32885	0.0381908	NA	6.235	0.0388787	0.005	6.5905	-0.00196418	NA	6.27331	0.0351707	NA
YDR403W	DIT1	4.24973	0.218552	NA	4.44291	0.191093	0.025	4.09094	0.00907102	NA	3.91748	-0.256439	-0.063	4.381	0.0699157	NA	4.11061	-0.0257246	NA	4.2577	0.210811	NA
YDR404C	RPB7	5.54344	0.0326792	NA	6.1178	0.043041	NA	6.38683	0.0149087	NA	5.91915	0.194133	0.086	6.22578	0.0569943	0.01	6.15823	0.0801273	0.018	5.59907	0.0827339	NA
YDR405W	NA	NA	NA	NA	7.76994	0.00307601	NA	NA	NA	NA	NA	NA	NA	7.74298	0.00342192	NA	7.81349	0.00175534	NA	NA	NA	NA
YDR407C	TRS120	6.04899	0.250045	0.112	6.18044	0.120289	0.058	6.08359	0.0134527	NA	6.19517	0.0587981	0.022	6.09375	0.0600852	0.03	5.9289	0.00958395	NA	5.96676	0.00413834	NA
YDR408C	ADE8	4.98347	0.530816	0.29	5.44906	0.380027	0.217	5.26893	0.000324045	NA	5.60609	0.190492	0.055	5.36676	0.152409	0.046	5.2841	0.158948	0.025	4.95443	-0.0494044	NA
YDR409W	SIZ1	5.13776	0.210191	NA	5.73643	0.381845	0.242	5.30315	0.117923	NA	5.39563	0.172645	0.041	5.31337	0.203189	0.09	5.38058	0.181808	0.05	4.70237	0.245274	NA
YDR410C	STE14	6.34872	0.186501	NA	6.80734	0.100461	NA	7.29247	0.0394441	NA	7.15922	-0.0560009	NA	7.16665	0.176796	0.092	7.12284	-0.0488865	NA	6.67142	0.0669731	NA
YDR411C	DFM1	7.36501	0.654351	0.493	7.59947	0.600076	0.484	8.3408	0.0437321	0.007	7.98222	0.160876	0.107	8.11256	0.202679	0.154	8.0108	0.112025	0.076	7.50118	0.0813604	0.017
YDR412W	RRP17	5.77911	0.190343	0.041	6.01738	0.106092	0.038	6.18622	0.0087514	NA	6.11257	0.0402333	NA	6.13491	0.0743159	0.039	6.07248	0.0330493	NA	6.10803	0.0335756	NA
YDR415C		3.19393	-0.016582	NA	3.90412	-0.10536	NA	4.27885	-0.0082451	NA	4.34655	0.0892061	NA	4.09404	0.145764	NA	4.24547	0.0857627	NA	3.32004	0.127469	NA
YDR416W	SYF1	5.46996	0.250659	0.075	5.94849	0.158566	0.079	5.83788	0.0045192	NA	5.62653	0.0438152	0.006	5.94281	0.0442391	0.018	5.73182	0.00484134	NA	5.46058	0.0620821	NA
YDR418W	RPL12B	8.38452	0.00302801	NA	8.56254	0.00146626	NA	8.99818	-2.84766e-06	NA	8.69971	0.0246621	0.011	8.91065	0.0249523	0.015	8.88544	0.000230121	NA	7.99401	0.0206109	NA
YDR419W	RAD30	3.93368	-0.0657709	NA	4.56095	0.0985793	NA	4.77114	0.0376543	NA	4.47579	0.23424	0.059	4.70021	0.0975039	NA	4.70682	-0.0641547	NA	4.61197	0.24805	NA
YDR421W	ARO80	4.47658	-0.16066	NA	5.04031	0.108272	NA	4.93455	-0.0342031	NA	4.88679	0.12696	NA	5.21457	0.0848517	NA	4.70122	0.0677445	NA	4.4967	0.0205349	NA
YDR422C	SIP1	4.68175	0.0889102	NA	5.32148	0.165092	0.05	5.50778	0.0164975	NA	5.53408	0.0820613	0.011	5.61876	0.119038	0.058	5.51413	0.0941476	0.025	5.34879	0.0369042	NA
YDR423C	CAD1	4.16049	0.195422	NA	4.97884	-0.0207176	NA	4.94337	0.00853639	NA	5.1068	-0.0329246	NA	4.94381	0.00676776	NA	5.18465	0.0476434	NA	4.53933	0.0791106	NA
YDR428C	BNA7	4.7743	0.252909	NA	5.40169	-0.00622721	NA	5.59459	-0.0620493	NA	5.4778	-0.198116	-0.058	5.30868	-0.104424	-0.021	5.19922	0.152408	0.019	4.88355	0.0372951	NA
YDR432W/YDR433W	NPL3	10.7546	-0.172866	-0.134	10.729	-0.0363678	NA	10.8942	-0.07367	NA	10.9146	-0.115334	-0.066	10.6239	-0.0764657	-0.042	10.8412	-0.0331632	NA	11.8293	-0.190854	-0.138
YDR435C	PPM1	4.95209	0.294834	0.039	5.11167	0.511998	0.339	5.21849	0.0420243	NA	5.27186	0.293499	0.143	5.18419	0.278519	0.155	5.3817	0.195664	0.075	4.29073	0.224072	NA
YDR439W	LRS4	4.22567	0.555871	0.29	4.90995	0.503184	0.301	5.34285	0.0574709	NA	5.26594	0.133542	NA	5.34957	0.281048	0.155	5.29828	0.103543	NA	4.77968	0.0479083	NA
YDR441C	APT2	5.37567	-0.143056	NA	5.87477	0.00542271	NA	6.50323	-0.0311275	NA	6.15726	-0.381814	-0.239	6.3905	0.0603738	NA	6.37046	-0.2348	-0.119	6.0148	0.0677595	NA
YDR447C	RPS17B	8.99484	0.322827	0.211	9.03686	0.425468	0.326	9.56625	0.0648397	NA	9.66528	0.405974	0.298	9.55401	0.2883	0.221	9.36778	0.155014	0.096	8.84192	0.204607	0.107
YDR448W	ADA2	5.18131	-0.124639	NA	5.37987	-0.0322154	NA	5.08204	-0.113563	NA	5.20066	-0.0979827	NA	5.21072	-0.0249279	NA	5.07905	-0.0972849	NA	4.48475	-0.273164	NA
YDR449C	UTP6	3.49264	0.0517605	NA	4.47683	-0.0703041	NA	4.78246	0.0801563	NA	4.61808	-0.0696466	NA	4.59313	0.198783	0.063	4.80409	0.156272	0.025	4.56688	-0.167902	NA
YDR450W	RPS18A	10.3694	0.1037	0.072	10.1346	0.0780824	0.054	10.5552	-0.00664543	0	10.19	0.368828	0.283	10.4176	0.0498626	0.038	10.168	0.00169291	NA	10.0046	0.0425734	0.02
YDR451C	YHP1	5.33188	0.054481	NA	5.46265	0.127076	0.05	5.72152	0.0151253	NA	5.89437	0.00566988	NA	5.86042	0.0690453	0.029	5.87893	0.0305907	NA	5.24068	0.109186	NA
YDR452W	PPN1	6.64736	0.018554	NA	6.98024	-0.0986776	NA	7.10071	-0.0286081	NA	7.21094	-0.10598	-0.008	7.17812	0.121233	0.06	6.85618	-0.117919	-0.034	6.43214	-0.0281726	NA
YDR456W	NHX1	6.24014	0.535094	0.339	6.38583	0.290855	0.185	6.45967	0.0316262	NA	6.4553	0.0916919	0.037	6.53986	0.155835	0.103	6.22777	0.0748694	0.022	5.99836	0.0775308	NA
YDR457W	TOM1	6.84368	0.206188	0.062	7.13114	0.259553	0.157	7.41405	0.0598611	NA	6.69627	0.438001	0.3	7.37193	0.18545	0.124	7.10327	0.103821	0.043	6.60716	0.0806788	NA
YDR458C	HEH2	3.50025	0.240244	0.04	3.93056	0.00193162	NA	3.71783	-0.0560812	NA	3.8302	-0.330328	-0.117	3.86565	0.0894422	NA	3.75242	0.145367	NA	2.71398	0.0974223	NA
YDR459C	PFA5	5.89561	0.348903	0.211	6.30367	0.160598	0.049	6.4891	0.0546985	NA	6.45926	-0.0556971	NA	6.48061	0.160578	0.079	6.07935	0.145238	0.043	5.905	0.186218	0.006
YDR460W	TFB3	4.25209	0.538754	0.204	4.82306	0.514578	0.312	5.49479	-0.0525127	NA	5.14664	0.26654	0.115	5.56141	0.0621913	NA	5.54975	0.296009	0.16	5.07428	0.351163	0.094
YDR461W	MFA1	8.94358	0.15525	0.085	7.29197	0.0088393	NA	7.41155	0.0985614	0.001	8.07356	0.055451	0.009	7.52407	0.0903567	0.048	7.47954	-0.0291294	NA	7.40229	0.00574035	NA
YDR463W	STP1	6.80793	0.169081	0.072	7.18324	0.0470458	0.024	6.25482	0.000879457	NA	6.60344	0.0253912	0.006	6.46108	0.028543	0.01	6.60902	1.81702e-06	NA	NA	NA	NA
YDR464W	SPP41	5.08993	0.296975	0.085	5.30302	0.134561	0.04	5.64189	0.00179216	NA	5.59353	0.139355	0.065	5.76772	0.104548	0.059	5.50519	0.0835185	0.029	4.9216	0.0419638	NA
YDR466W	PKH3	4.85394	-0.0492963	NA	5.51932	0.108097	NA	5.60404	-0.00723968	NA	5.53349	0.0733246	NA	5.77697	0.14709	0.052	5.77273	0.124974	NA	5.13921	0.189448	NA
YDR469W	SDC1	4.97777	-0.10337	NA	5.11748	-0.018113	NA	6.06937	0.0200628	NA	5.36634	0.119118	NA	5.60883	0.102855	NA	5.72108	0.0161162	NA	4.60942	-0.00409963	NA
YDR470C	NA	NA	NA	NA	5.07513	0.0556032	NA	4.85153	-0.00487935	NA	4.72006	0.0895641	0.009	5.07616	0.0845667	0.034	5.17218	0.00394707	NA	4.46798	0.0649305	NA
YDR471W	RPL27B	8.50131	0.599681	0.477	8.46333	0.512762	0.407	8.78667	0.0857618	0.006	8.79398	0.556849	0.449	8.83332	0.378449	0.296	8.68533	0.160751	0.111	8.29173	0.152232	0.064
YDR472W	TRS31	4.48423	0.138696	NA	5.08607	0.160859	0.04	5.32079	0.024025	NA	5.12067	0.205454	0.079	5.33215	0.116384	0.045	5.27079	0.0439356	NA	5.00526	0.0408901	NA
YDR473C	PRP3	3.20955	0.202529	NA	4.52858	0.238321	0.062	4.35373	-0.0737243	NA	4.83559	-0.124829	NA	4.36696	0.127435	NA	4.36589	-0.0140932	NA	3.96018	0.0131151	NA
YDR478W	SNM1	6.37099	-0.0307353	NA	6.19902	-0.0167595	NA	6.86573	-0.0135132	NA	7.20379	-0.0251741	NA	6.5153	-0.039989	-0.013	6.38121	-0.00531931	NA	6.4531	-0.0634964	-0.028
YDR481C	PHO8	5.43776	0.289543	0.106	5.90526	0.173572	0.089	5.69517	0.0591074	NA	5.87205	0.164023	0.089	5.73634	0.294145	0.207	6.20831	0.0988071	0.05	6.2998	0.0302314	NA
YDR483W	KRE2	8.32924	0.185558	0.109	8.56018	0.0954738	0.062	8.38707	0.0117879	NA	8.21434	0.0770659	0.047	8.45395	0.0722952	0.053	8.38268	0.0316246	0.016	8.21392	0.026642	NA
YDR484W	VPS52	5.90956	0.0218039	NA	5.86573	0.0994746	NA	5.58834	-0.0096433	NA	6.37554	0.170381	0.072	5.6492	0.115277	0.035	5.75959	0.0672512	NA	5.08354	0.0799431	NA
YDR485C	VPS72	4.54222	0.167472	NA	5.18471	0.252913	0.128	5.01322	0.0245694	NA	5.16358	0.166656	0.073	5.05627	0.135201	0.066	5.10164	0.0104177	NA	4.35973	0.187535	NA
YDR486C	VPS60	4.89313	-0.214509	NA	4.81511	0.0220167	NA	5.18443	-0.0155772	NA	5.07099	-0.140618	-0.036	5.32728	0.0180747	NA	5.21396	-0.0436916	NA	4.93715	-0.0681546	NA
YDR490C	PKH1	5.83405	-0.0191526	NA	6.07454	0.170852	0.037	6.86565	-0.0123646	NA	6.35004	0.171144	0.055	6.82362	0.11337	0.042	6.72851	0.0857575	0.002	6.08568	0.105541	NA
YDR493W	MZM1	4.08536	0.289771	NA	4.45251	0.158432	NA	4.92832	-0.00201351	NA	4.70362	0.144807	0.013	4.88657	0.301989	0.173	4.8814	0.130517	0.015	4.32176	0.198092	NA
YDR494W	RSM28	5.64037	0.455817	0.245	5.9596	0.302801	0.183	5.84651	0.044342	NA	5.55053	0.280865	0.151	6.05741	0.221084	0.146	6.087	0.109977	0.045	5.78511	0.111801	NA
YDR496C	PUF6	5.99482	0.239106	0.074	6.38349	0.212484	0.114	6.3728	0.0163642	NA	6.2148	0.0907093	0.022	6.17213	0.253535	0.168	6.2259	0.0182628	NA	6.07884	0.127363	NA
YDR497C	ITR1	7.86657	0.0402994	NA	7.69786	0.151183	0.084	7.83125	0.00728459	NA	7.77854	0.169497	0.101	7.7906	0.187148	0.133	7.60189	0.0621842	0.024	7.23525	0.162149	0.046
YDR500C	RPL37B	8.62709	0.0592491	0.007	8.49128	0.0341813	0.003	9.593	-0.00098698	NA	9.07174	0.240094	0.168	9.3682	0.153688	0.118	8.87347	0.117926	0.073	8.79712	0.0502494	0.007
YDR501W	PLM2	5.02058	0.0285609	NA	5.48719	0.0288419	NA	5.74451	-0.0048951	NA	5.55969	-0.0664467	NA	5.8027	0.0274956	NA	5.86083	-0.0156955	NA	5.49762	0.035643	NA
YDR502C	SAM2	7.60175	0.00234863	NA	7.90352	0.0203028	0.004	8.06389	-1.85629e-05	NA	7.37781	-0.035356	NA	8.04189	0.0100932	NA	7.64608	0.0070776	NA	7.17854	0.00706059	NA
YDR508C	GNP1	7.52816	0.0582756	NA	7.54491	0.0324467	NA	7.53954	0.00890695	NA	7.32892	-0.212534	-0.135	7.64264	0.05519	0.034	7.63411	0.0201468	NA	7.14229	0.0196984	NA
YDR510W	SMT3	8.11328	0.194359	0.085	8.2692	0.0114606	NA	8.91383	-0.0184575	NA	8.74033	0.0481794	NA	8.82899	0.0590999	0.022	8.86988	0.12653	0.083	8.21785	0.0450271	NA
YDR511W	SDH7	6.43164	-0.00124912	NA	6.68208	0.00202739	NA	6.69943	0.00477415	NA	6.72576	0.00638337	NA	6.48133	0.0302165	0.008	6.40777	0.0389117	0.006	6.58941	0.0212461	NA
YDR513W	GRX2	7.35519	0.0838496	0.027	7.56018	0.0431418	0.019	7.35325	0.00898231	NA	7.67427	0.0831706	0.052	7.74944	0.0235595	0.013	7.71738	0.0249046	0.012	7.563	0.0110434	NA
YDR515W	SLF1	6.28863	0.314461	0.177	6.27695	0.445265	0.324	5.06386	0.11882	NA	5.34613	0.25796	0.136	5.2768	0.554358	0.402	5.58782	0.262335	0.143	6.19327	0.228171	0.101
YDR516C	EMI2	7.71436	0.366292	0.265	7.16776	0.422394	0.322	6.88296	0.0312225	0.001	7.0297	0.0377514	0.015	7.18396	0.116099	0.085	7.48398	0.0577602	0.036	7.09806	0.10878	0.043
YDR517W	GRH1	5.31566	0.213666	NA	5.48008	0.110345	NA	6.40552	0.0321316	NA	6.29735	0.174621	0.078	6.26856	0.220778	0.138	6.6131	0.186244	0.097	5.74912	0.112955	NA
YDR520C	URC2	3.32859	0.0345344	NA	4.7104	0.026119	NA	4.31297	-0.007189	NA	4.24156	0.00637717	NA	4.07754	0.0473017	NA	4.31391	-0.00222545	NA	3.90896	0.00501456	NA
YDR524C	AGE1	4.73497	-0.108573	NA	5.49104	-0.00299075	NA	5.65198	0.059776	NA	5.71016	-0.14354	-0.038	5.30775	0.114218	0.024	5.63239	-0.00805921	NA	5.14638	0.0064626	NA
YDR524C-B		10.8742	0.225115	0.178	10.9346	0.115657	0.071	10.8736	-0.0561955	NA	11.0757	0.0628042	0.012	10.8744	0.0523163	0.017	10.9598	0.135284	0.102	11.1208	0.0511046	NA
YDR525W-A	SNA2	4.62343	0.196232	0.09	4.63164	0.185296	0.094	4.75078	0.0113063	NA	4.66715	-0.0156008	NA	4.22949	-0.0896446	NA	5.01554	0.0818121	NA	4.83026	0.148073	0.015
YDR527W	RBA50	5.47759	-0.0108754	NA	6.33596	0.0267681	NA	6.44465	-0.00807766	NA	6.4844	0.00550426	NA	5.98468	-0.0146303	NA	6.2037	-5.12838e-05	NA	5.99312	0.0234672	NA
YDR528W	HLR1	6.97469	0.162367	0.079	6.45252	0.132849	0.066	6.6999	0.0239504	NA	6.87548	0.132849	0.081	6.39497	0.148212	0.098	7.11825	0.056711	0.031	6.92254	0.0830463	0.025
YDR529C	QCR7	10.0734	0.135823	0.094	10.0921	0.0838527	0.058	9.89494	0.0154517	0	10.0111	0.0839216	0.057	10.1624	0.100684	0.079	9.78894	0.0538963	0.039	10.405	0.00899033	NA
YDR530C	APA2	4.58007	0.232633	0.122	5.12832	0.18186	0.081	4.78291	0.130273	NA	4.97485	0.0696589	NA	4.87251	0.194991	0.108	4.84596	0.15169	0.043	4.89145	0.049775	NA
YDR531W	CAB1	7.57713	0.00739097	NA	7.99606	0.00459238	NA	7.35533	-0.00158663	NA	7.4025	0.0148258	NA	7.45474	0.0322949	0.017	7.55396	0.00746408	NA	7.79218	0.00390726	NA
YDR532C	KRE28	4.76719	0.409025	0.133	5.29497	0.0969934	NA	5.37136	0.0523255	NA	5.44494	0.164728	0.066	5.35478	0.250486	0.153	5.30668	0.0813944	0.004	5.05702	0.0517327	NA
YDR533C	HSP31	9.16484	0.445603	0.338	8.97269	0.645412	0.544	9.25037	0.0169655	NA	8.6029	0.396313	0.292	9.43883	0.0722454	0.05	9.73272	0.10191	0.074	9.62983	0.113874	0.064
YDR538W	PAD1	4.63916	0.198147	NA	5.62184	-0.0280479	NA	5.98062	0.0329284	NA	5.49778	0.232391	0.102	5.5574	0.11851	0.044	5.82754	-0.00718414	NA	5.11043	0.123692	NA
YDR539W	FDC1	5.86994	0.566326	0.347	6.44854	0.421943	0.283	6.52294	0.0701393	NA	5.667	0.282829	0.119	6.31302	0.263283	0.158	6.79271	0.171676	0.078	6.10574	0.248783	0.047
YDR540C	IRC4	2.11235	-0.143239	NA	3.85419	0.0897043	NA	4.76234	0.0259026	NA	3.69264	-0.254279	NA	4.1144	0.0390373	NA	4.78307	0.060313	NA	2.69369	0.124137	NA
YEL001C	IRC22	6.40307	0.316131	0.124	6.61386	0.359348	0.229	7.29613	0.0528734	NA	7.51174	0.142149	0.078	7.31867	0.203389	0.143	7.39843	0.132622	0.078	6.80645	0.159619	0.034
YEL002C	WBP1	7.21395	0.517159	0.382	7.2102	0.492225	0.382	6.85265	0.0806458	NA	6.93466	0.325634	0.2	6.85639	0.28517	0.186	7.00922	0.348891	0.229	6.72577	0.421401	0.262
YEL004W	YEA4	3.65459	0.0148867	NA	4.05328	-0.218343	-0.089	3.76235	-0.0182848	NA	3.94607	0.073372	NA	3.4215	-0.0516535	NA	3.64069	0.00492341	NA	4.30932	-0.0633431	NA
YEL005C	VAB2	5.24829	0.0347969	NA	5.45501	0.0319682	NA	5.01273	0.0184608	NA	5.01234	0.135257	0.049	5.18919	0.0351019	NA	4.98453	0.0266029	NA	4.62082	0.135892	NA
YEL006W	YEA6	5.2192	0.06855	NA	5.85387	-0.00248572	NA	6.48811	0.0383383	NA	6.18384	-0.0143283	NA	6.28147	0.106329	0.054	6.26384	0.017338	NA	5.88656	0.0854501	NA
YEL007W	MIT1	7.37811	0.568324	0.422	7.36057	0.459335	0.345	7.41383	-0.0665146	NA	7.10103	0.269256	0.148	7.25958	0.325872	0.228	7.30903	0.241674	0.131	6.80674	0.353215	0.164
YEL013W	VAC8	3.14059	-0.263034	NA	3.99931	0.035437	NA	4.51719	-0.00775714	NA	4.71602	-0.0874625	NA	3.87955	0.00499091	NA	4.38557	-0.0360313	NA	3.66109	-0.30309	NA
YEL015W	EDC3	6.81121	0.117995	NA	7.06906	0.15996	0.064	7.4484	-0.0207317	NA	7.45001	0.0881474	0.016	7.37317	0.0815056	0.029	7.42922	0.0640979	0.007	6.90674	0.0967242	NA
YEL016C	NPP2	4.16883	0.498176	0.132	4.56764	0.187965	0.011	5.34799	0.0385863	NA	5.05927	0.109241	0.018	5.22289	0.137052	0.064	4.66887	0.219572	0.08	4.58605	0.138669	NA
YEL021W	URA3	8.09142	-0.0265896	NA	8.23377	-0.00622612	NA	7.74968	-0.00712734	NA	9.56351	-0.0154044	NA	7.62767	0.0269152	0.003	7.4217	0.0168957	NA	7.987	-0.0244689	NA
YEL022W	GEA2	5.18993	-0.057999	NA	5.04691	-0.0542208	NA	5.45295	-0.0493759	NA	5.60736	0.204377	0.069	5.48971	0.110675	0.015	5.72169	0.0445614	NA	4.97707	0.145092	NA
YEL023C		3.87079	0.611207	0.314	4.34639	0.383631	0.217	3.65849	0.0714994	NA	NA	NA	NA	3.66805	0.2341	0.097	3.77727	0.0152503	NA	4.28552	0.00167702	NA
YEL026W	SNU13	9.36845	0.108954	0.064	9.41056	0.00684181	NA	9.66006	0.00249541	NA	9.61974	0.0119856	0.004	9.62877	0.0146208	0.008	9.88015	-0.00184505	NA	10.1823	0.00167275	NA
YEL027W	VMA3	10.3082	0.049822	0.032	10.0687	0.0254438	0.012	10.0238	0.0107935	NA	10.1042	-0.0176248	NA	10.1586	0.01319	0.002	9.92291	0.00928418	NA	9.58472	0.0177858	NA
YEL028W		1.99977	0.115066	NA	2.18798	0.411498	0.052	2.32943	0.156897	NA	2.41411	0.551297	0.232	2.16082	0.174879	NA	2.43388	0.355417	0.052	2.46011	0.0609068	NA
YEL029C	BUD16	4.29085	-0.162002	NA	4.9972	-0.0304478	NA	5.22259	-0.0340245	NA	5.24273	0.0893873	NA	5.12413	0.0849432	NA	5.05156	0.013228	NA	4.51592	-0.0280034	NA
YEL030W	ECM10	4.24899	-0.29977	NA	4.96203	-0.0947068	NA	4.77634	0.0392524	NA	4.62717	0.106391	NA	4.55315	0.122125	NA	4.70891	0.0223667	NA	3.98225	0.120361	NA
YEL031W	SPF1	7.72407	0.44363	0.306	7.81711	0.537628	0.426	8.19865	0.0555971	NA	8.08696	0.234646	0.156	7.89127	0.338942	0.259	8.01869	0.114839	0.071	7.60856	0.249154	0.124
YEL032W	MCM3	3.88843	0.0285326	NA	4.27952	0.0435562	NA	4.01409	0.0833859	NA	4.45803	0.166568	NA	4.34785	0.287619	0.134	4.2178	-0.0509681	NA	3.86593	0.0963171	NA
YEL037C	RAD23	8.69192	0.184613	0.109	8.4955	0.155831	0.083	8.42831	0.0553218	NA	8.17113	0.137237	0.062	8.26753	0.10238	0.049	8.26278	0.108664	0.052	8.07028	0.050093	NA
YEL038W	UTR4	5.93365	0.0289632	NA	6.54691	-0.0166428	NA	6.723	-0.0211944	NA	6.50452	0.0326662	NA	6.54468	0.0735884	0.024	6.30006	0.0321971	NA	6.14911	0.0474781	NA
YEL042W	GDA1	6.28979	0.41649	0.18	6.7368	0.268517	0.142	7.5072	0.0663715	NA	6.83044	0.477096	0.336	7.46944	0.274547	0.188	7.39492	0.243441	0.151	6.66734	0.158353	NA
YEL044W	IES6	6.15677	0.0297849	NA	6.35929	0.0815389	NA	7.04738	0.024728	NA	6.59056	0.0814426	NA	6.88624	0.153769	0.098	6.75592	0.0605162	NA	6.31176	0.150773	0.036
YEL047C	FRD1	7.22512	0.0389283	NA	7.44296	0.0156208	0.003	NA	NA	NA	NA	NA	NA	6.98337	0.0306208	0.015	7.45645	0.00916343	0	NA	NA	NA
YEL050C	RML2	7.18372	0.363931	0.245	7.3562	0.222171	0.159	7.00792	-0.00919912	NA	7.02405	0.0146049	NA	6.90289	0.171483	0.11	6.94849	0.0914318	0.036	6.73896	0.179559	0.052
YEL051W	VMA8	8.00439	0.164841	0.084	7.85654	0.264527	0.178	7.72557	0.046852	NA	7.78125	0.224791	0.143	7.64721	0.231161	0.167	8.03442	0.0563769	0.023	7.56155	0.0260886	NA
YEL054C	RPL12A	8.08522	-0.00102107	NA	8.58096	0.0999193	0.009	9.0682	0.0567718	NA	9.01838	0.0295813	NA	9.05314	0.00957579	NA	8.87484	-0.0668097	NA	7.97134	0.0465633	NA
YEL055C	POL5	4.70331	0.370697	0.074	5.11187	0.00762127	NA	5.84281	0.0580304	NA	5.46337	0.0809936	NA	5.58439	0.0781565	NA	5.91131	0.183899	0.071	4.99737	-0.0248832	NA
YEL056W	HAT2	5.3147	0.0151685	NA	5.90254	0.0328733	NA	6.29197	0.00559315	NA	6.24274	0.140891	0.049	6.00267	0.0663387	NA	6.30873	0.159057	0.076	5.65458	0.0385205	NA
YEL058W	PCM1	7.97572	0.0893697	0.023	8.35597	0.0756936	0.042	9.097	0.00328937	NA	8.70211	0.0654571	0.041	8.74512	0.0317552	0.019	9.05722	0.0219946	0.01	8.35975	0.0250595	NA
YEL060C	PRB1	7.98545	0.10279	0.046	8.42566	0.117331	0.077	7.07833	-0.0044594	NA	7.53292	-0.0519289	NA	7.3909	0.0815848	0.047	7.62471	0.032433	NA	7.96307	0.0888396	0.035
YEL061C	CIN8	5.4058	0.415537	0.207	5.43522	0.0731999	NA	4.82175	0.0421098	NA	4.58536	-0.0352851	NA	4.57492	0.146108	0.016	4.64639	0.0177326	NA	4.79738	0.321146	0.081
YEL062W	NPR2	4.28538	0.225594	NA	5.89682	0.162087	0.067	6.0639	0.0140654	NA	5.88791	0.127682	0.048	6.17027	0.0909863	0.041	5.97194	0.160436	0.074	5.66734	0.0765638	NA
YEL064C	AVT2	1.65896	-0.508019	-0.107	3.12511	-0.0245153	NA	3.78121	-0.0488973	NA	3.66257	-0.0768262	NA	3.57001	0.0773778	NA	3.89143	-0.0738809	NA	3.44551	-0.181692	NA
YEL065W	SIT1	6.05676	0.115387	0.027	6.51251	0.0776109	0.036	5.9355	0.0202306	NA	6.74701	0.0465706	0.023	5.81394	0.0736086	0.037	6.29913	0.0395402	0.015	6.55486	0.057259	0.012
YEL066W	HPA3	6.13149	0.0641302	NA	6.43509	0.0183407	NA	8.06995	-0.00628134	NA	6.49319	0.0912655	0.022	7.76545	-0.00392403	NA	7.36027	0.00871489	NA	7.27766	0.0147794	NA
YEL068C		7.10457	0.00939708	NA	7.73132	0.00480151	NA	7.95816	0.002564	NA	7.87632	0.0124075	0.002	7.89552	0.00182481	NA	7.83577	0.00453864	NA	7.8732	-6.04396e-05	NA
YEL071W	DLD3	7.78455	0.372946	0.271	7.53864	0.282288	0.207	7.00645	0.0624662	0.01	7.2252	0.313929	0.227	7.0276	0.316632	0.243	7.37651	0.0726397	0.043	7.10595	0.0697085	0.012
YEL072W	RMD6	3.65882	-0.000217856	NA	4.30502	0.176639	0.025	3.89065	0.00213891	NA	4.1088	0.0616441	NA	4.00413	0.17773	0.047	4.10661	-0.00729829	NA	3.55491	0.191576	NA
YER001W	MNN1	6.95328	0.427312	0.309	7.10782	0.362787	0.26	6.85153	0.0323549	NA	7.09953	0.0820052	NA	6.84887	0.277967	0.185	7.45314	0.141353	0.055	7.69408	0.413673	0.286
YER002W	NOP16	5.87938	0.634902	0.435	6.10669	0.573608	0.437	5.99423	0.123279	0.005	6.10131	0.239188	0.133	5.94761	0.507533	0.374	6.02482	0.246504	0.141	6.13773	0.328852	0.151
YER003C	PMI40	6.9764	0.542435	0.368	6.77109	0.558165	0.427	7.35994	0.0778361	NA	7.50629	0.478167	0.354	7.26098	0.394051	0.291	7.54491	0.120402	0.041	6.85728	0.305857	0.125
YER006W	NUG1	6.48083	0.220126	0.093	6.56986	0.0741238	0.022	6.53662	-0.00907024	NA	6.61377	0.137593	0.074	6.43483	0.0992238	0.056	6.42905	-0.0179023	NA	6.32811	0.0340396	NA
YER007C-A	TMA20	6.42642	0.0100315	NA	6.91095	0.206382	0.088	7.76214	-0.00368494	NA	7.44597	0.129538	0.045	7.57786	0.0460588	NA	7.52888	0.01213	NA	6.95568	0.185553	0.028
YER007W	PAC2	4.23682	0.0905608	NA	4.8749	0.019774	NA	4.86023	-0.095418	NA	4.88834	-0.176909	-0.087	4.80611	-0.0669409	NA	4.95725	-0.144002	-0.051	4.07573	0.0904047	NA
YER008C	SEC3	6.11298	0.141074	0.053	6.09169	0.112951	0.058	5.32589	0.00191735	NA	5.51767	0.0207448	NA	5.36413	0.0822292	0.036	NA	NA	NA	NA	NA	NA
YER011W	TIR1	5.52551	0.0163182	NA	3.0468	0.325065	0.129	3.09298	-0.0908618	NA	4.11595	0.230849	0.064	3.79822	0.195124	0.047	3.20267	0.184987	NA	2.99619	0.0314805	NA
YER012W	PRE1	6.63485	0.111035	0.037	6.87719	0.0514581	0.02	6.11357	0.0221788	NA	6.15177	0.0606971	0.02	6.07158	0.0457456	0.017	6.24949	0.00695495	NA	6.06066	0.012437	NA
YER019C-A	SBH2	7.19754	0.208966	0.084	7.51158	0.00514549	NA	8.19172	-0.000530171	NA	7.64403	0.0120428	NA	7.92578	0.0230631	0.008	7.84729	-0.00821008	NA	7.72839	0.0458865	NA
YER019W	ISC1	6.64684	0.109007	NA	6.8269	0.0335293	NA	7.414	0.0103701	NA	7.05923	0.0257556	0.004	7.43489	0.0614951	0.04	7.35568	0.0268149	0.009	6.99232	0.0264954	NA
YER020W	GPA2	5.50845	0.0381017	NA	6.11834	0.0569068	NA	5.95708	-0.0349307	NA	5.95103	0.0255513	NA	5.76995	0.0688997	NA	6.11871	-0.0417977	NA	5.81141	-0.0404883	NA
YER023W	PRO3	7.87904	0.20931	0.093	7.59212	0.372778	0.252	8.65	-0.00092555	NA	7.53695	0.423016	0.294	8.36471	0.184647	0.127	8.30536	0.212027	0.144	8.42218	-0.00644366	NA
YER025W	GCD11	6.47233	0.185979	0.085	6.18756	0.0675196	0.01	6.09437	0.0228433	NA	6.31742	-0.0235892	NA	6.08786	0.0476506	0.005	6.41727	0.0327995	NA	6.48313	0.00735153	NA
YER026C	CHO1	6.4851	0.288898	0.114	6.9874	0.222368	0.122	7.08357	-0.0163327	NA	7.17124	0.185981	0.099	7.10764	0.173396	0.108	6.98152	-0.0602307	-0.013	6.66673	0.123893	NA
YER027C	GAL83	6.413	0.351228	0.12	7.01964	0.225183	0.102	7.50219	0.0295367	NA	7.36045	0.292549	0.174	7.30067	0.269088	0.179	7.39965	0.236328	0.138	6.8828	0.208622	0.037
YER028C	MIG3	3.83521	0.0173954	NA	4.45378	0.00808622	NA	4.31693	0.000729411	NA	4.43367	0.0640021	NA	3.94546	0.0940027	NA	4.27093	0.0496809	NA	3.117	0.0437739	NA
YER029C	SMB1	6.88041	0.00995644	NA	6.98166	0.00591593	NA	NA	NA	NA	6.69068	0.0349297	0.011	6.65088	0.0305846	0.013	NA	NA	NA	6.56223	0.0588069	NA
YER030W	CHZ1	8.66366	0.0414423	NA	9.0512	0.0730113	0.042	9.49756	0.00767919	NA	9.19453	0.0547642	0.03	9.56002	0.0255061	0.013	9.2013	0.0496061	0.031	9.02728	0.00693315	NA
YER031C	YPT31	8.34136	0.533276	0.418	8.4413	0.516119	0.412	8.52891	0.0604292	NA	8.56657	0.286827	0.173	8.64542	0.305039	0.217	8.48916	0.382379	0.27	8.30938	0.331547	0.192
YER032W	FIR1	3.82625	-0.0856826	NA	4.49847	-0.0447924	NA	5.20846	-0.0314059	NA	4.78796	0.0153837	NA	5.14471	0.0282254	NA	5.12715	-0.0497413	NA	4.5269	0.0831872	NA
YER033C	ZRG8	3.4638	-0.0725333	NA	4.59218	0.222316	0.046	4.66715	-0.0254867	NA	4.43294	0.0250027	NA	4.46972	0.18237	0.053	4.70885	0.0241528	NA	4.25919	-0.0266304	NA
YER035W	EDC2	6.66141	0.32474	0.131	7.20951	0.222338	0.12	7.22389	-0.108131	NA	7.42736	0.253997	0.152	7.12435	0.0980459	0.034	7.10677	0.113758	0.044	6.74642	0.0642052	NA
YER036C	ARB1	8.30199	0.17461	0.09	8.54936	0.09207	0.054	8.77282	0.00374968	NA	9.00088	0.119419	0.084	8.75103	0.100997	0.076	8.74182	0.0230386	0.002	8.78442	0.023498	NA
YER037W	PHM8	7.37206	0.422187	0.284	7.5872	0.43328	0.331	6.89858	0.0353353	NA	7.16858	0.130965	0.075	6.94379	0.195897	0.137	7.10957	0.0809163	0.042	7.08259	0.0883573	0.016
YER042W	MXR1	6.48131	0.178568	0.037	6.91016	0.197104	0.094	7.12417	-0.00667434	NA	7.26376	0.194555	0.123	7.1204	0.15705	0.098	6.77374	0.106622	0.025	7.0908	0.189932	0.071
YER043C	SAH1	9.05992	0.0919683	0.04	9.06626	0.0706327	0.039	9.24274	0.0119005	NA	9.23299	0.0183248	NA	9.29385	0.100318	0.075	9.1893	0.0209651	NA	8.79287	0.0581553	0.007
YER045C	ACA1	4.27076	-0.0429652	NA	4.73954	0.00792591	NA	4.4442	-0.0362876	NA	4.19159	0.232902	0.058	4.41298	0.121345	0.01	4.67641	-0.00229522	NA	4.45583	0.0559636	NA
YER047C	SAP1	3.52034	-0.0813268	NA	3.69199	0.184881	NA	4.05491	-0.0154459	NA	4.07958	-0.0450463	NA	3.83274	0.101306	NA	3.82709	0.0775718	NA	3.05569	0.482684	0.038
YER048C	CAJ1	6.42108	0.36696	0.19	6.54783	0.497551	0.373	6.83345	0.0552081	0.011	7.16577	0.191724	0.129	6.93744	0.139916	0.1	6.57821	0.0335307	0.008	6.26151	0.123601	0.017
YER048W-A	ISD11	5.95873	-0.0225058	NA	6.28507	-0.00228406	NA	6.92771	0.073713	NA	6.90193	-0.17826	-0.065	6.87065	0.0803892	0.014	6.71383	-0.0464859	NA	6.23704	0.168421	0.015
YER049W	TPA1	6.28839	0.502594	0.338	6.19315	0.398513	0.28	6.06187	0.0422872	NA	5.80394	0.310175	0.193	5.8812	0.353861	0.253	6.12258	0.0415064	0.009	6.10331	0.084315	0.005
YER050C	RSM18	6.92161	0.264764	0.154	6.92708	0.330858	0.235	6.70247	0.0202016	NA	6.35563	0.170494	0.094	6.72369	0.124683	0.084	6.5839	0.0192243	NA	6.48096	0.0689998	NA
YER051W	JHD1	4.41122	0.0763099	NA	4.54211	0.032682	NA	3.53643	0.0151406	NA	3.83848	-0.110479	NA	3.7123	-0.0158229	NA	4.06431	0.0415773	NA	4.66926	0.0557983	NA
YER053C-A		9.0177	0.0413227	0.001	8.92711	0.0536147	0.029	7.82284	0.0142962	NA	7.00212	-0.00388725	NA	7.94454	0.0390901	0.017	8.5979	0.0431872	0.016	8.94117	0.0676969	0.037
YER054C	GIP2	5.80039	0.165932	0.021	6.35344	0.0526736	0.013	6.26673	0.00843395	NA	6.4705	0.0128632	NA	6.63359	0.0522737	0.029	6.18002	0.0627757	0.025	6.40677	0.0436362	NA
YER056C-A	RPL34A	9.98103	0.0854397	0.05	10.1023	0.0444684	0.028	10.5312	0.00216703	NA	10.2688	0.117361	0.083	10.6036	0.0276818	0.021	10.4815	0.00837429	0.004	10.0685	0.00841112	NA
YER057C	HMF1	7.94753	-0.00442689	NA	7.36224	0.0297991	NA	7.96061	0.000802124	NA	7.35121	0.0347667	0.005	7.83337	0.01504	NA	7.6696	0.022149	0.002	8.01357	-0.0176377	-0.004
YER059W	PCL6	2.72611	0.328815	NA	4.75333	-0.0168701	NA	4.74201	0.0668408	NA	4.85911	0.101409	NA	4.63607	0.115048	0.002	4.88433	0.0877288	NA	4.12795	-0.0418951	NA
YER060W	FCY21	3.4367	0.20503	NA	3.93371	0.415021	0.185	4.8329	0.0228758	NA	4.51814	0.0555633	NA	4.33054	0.307482	0.133	4.82294	0.285429	0.106	3.82704	0.366071	0.01
YER061C	CEM1	3.41756	0.00692021	NA	4.25141	0.0991189	NA	3.68139	0.0135388	NA	3.69219	0.246068	0.045	3.25363	0.145563	NA	3.96229	0.163637	NA	2.84399	0.0975673	NA
YER063W	THO1	5.2193	0.242138	NA	5.17085	0.0301635	NA	6.26066	0.0461165	NA	5.18426	0.0185144	NA	6.03154	0.297174	0.185	5.97954	-0.0915125	NA	5.14566	0.0622823	NA
YER064C	VHR2	5.03428	-0.178369	NA	6.79396	0.0356487	NA	6.31807	0.00896583	NA	6.54874	-0.0226078	NA	6.02429	0.030084	NA	6.58115	0.018935	NA	5.74921	0.0464276	NA
YER067W	RGI1	7.182	0.0366984	0.008	7.06111	0.0237687	0.005	6.29137	0.00733328	NA	6.58164	0.0528473	0.021	7.1338	0.0653418	0.045	NA	NA	NA	NA	NA	NA
YER068W	MOT2	5.35782	0.46277	0.24	5.58541	0.428274	0.289	5.54234	0.0690427	NA	5.68561	0.318538	0.201	5.45697	0.272826	0.179	5.70387	0.23638	0.142	5.36806	0.253734	0.07
YER070W	RNR1	6.91146	0.0116639	NA	7.05898	0.00212621	NA	7.28143	-0.00722958	NA	8.0264	0.00364725	NA	7.31858	0.0155122	0.006	7.72375	0.00176357	NA	7.7112	0.00702454	NA
YER071C	TDA2	6.69183	0.0226089	NA	6.6933	0.0301035	NA	7.03168	0.0204582	NA	6.55365	0.00993471	NA	6.82468	0.02768	NA	6.77994	0.0121042	NA	6.23955	0.0418268	NA
YER072W	VTC1	8.9678	0.185535	0.127	9.08347	0.120487	0.084	8.85495	0.0108983	NA	8.99462	0.0441748	0.027	8.90632	0.0835193	0.064	9.38348	0.0197846	0.011	9.24253	0.00317635	NA
YER073W	ALD5	7.53019	0.0275956	NA	7.54663	0.015123	NA	7.29507	-0.0371301	NA	7.08957	-0.0457481	NA	7.20204	-0.0253067	NA	6.85478	0.0411362	NA	7.33877	-0.442222	-0.286
YER074W	RPS24A	8.90958	0.131274	0.075	8.56524	0.0835405	0.047	9.22161	0.00533148	NA	9.15029	0.11273	0.075	9.26771	0.0536019	0.038	9.23723	0.0163444	0.005	8.98509	0.0136841	NA
YER074W-A	YOS1	6.22268	0.260496	0.089	6.24725	0.19307	0.081	6.52981	0.0404367	NA	6.15629	0.10533	0.017	6.46329	0.168137	0.096	6.70777	0.0529194	NA	6.28864	0.0349732	NA
YER075C	PTP3	4.62061	0.407507	0.128	5.17617	0.181791	0.039	4.95011	-0.0286197	NA	5.23064	0.250322	0.106	5.01172	0.261362	0.137	4.72208	-0.0750962	NA	4.59735	0.287054	0.005
YER076C		3.13842	0.692314	0.385	4.13498	0.421803	0.19	4.47843	0.0433776	NA	4.67737	0.223151	0.064	4.15941	0.182881	0.037	4.20642	0.238839	0.06	3.08207	0.547286	0.157
YER077C		4.75711	0.592951	0.336	4.82676	0.393597	0.224	4.92012	0.0108359	NA	4.3515	0.0585239	NA	4.95938	0.168162	0.079	4.95776	0.0808638	NA	4.77742	0.109447	NA
YER079W		5.22905	0.307464	0.099	5.36353	0.32065	0.168	4.27735	0.0383393	NA	4.52514	0.178095	0.014	4.60928	0.111024	NA	4.59836	0.203395	0.052	5.43922	-0.158966	NA
YER080W	AIM9	7.01292	0.0915348	0.009	7.06877	0.119927	0.062	6.9643	-0.00115029	NA	6.93472	0.130246	0.071	6.94488	0.0778405	0.043	6.99043	0.0272911	NA	6.25461	0.0237315	NA
YER081W	SER3	7.53153	0.100602	0.038	7.91948	0.0326925	0.007	6.53292	0.0512893	NA	6.60404	0.0727867	0.022	6.74864	0.181923	0.123	6.99385	-0.0109951	NA	6.63404	0.0491571	NA
YER082C	UTP7	4.64908	0.41647	0.176	4.83765	0.125485	0.016	4.40691	0.00528653	NA	4.54075	0.207837	0.078	4.23484	0.357315	0.205	4.59728	0.0744354	NA	4.27463	0.422114	0.138
YER083C	GET2	5.86835	0.0614132	NA	6.13594	-0.032599	NA	6.34853	-0.00165033	NA	6.25289	0.180426	0.084	6.27238	0.14468	0.078	6.52375	0.0166131	NA	5.89671	0.0283423	NA
YER086W	ILV1	9.00519	0.00112672	NA	9.28804	0.00409811	NA	9.56025	-0.000862724	NA	9.41327	0.0303392	0.018	9.5917	0.00566863	0.002	9.49949	0.00376995	NA	8.58463	0.0273309	NA
YER087W	AIM10	5.06833	0.280359	0.053	5.08779	0.348511	0.181	5.08749	-0.0555295	NA	5.20082	0.0753957	NA	5.06469	0.206427	0.085	5.18043	0.258929	0.108	4.88631	0.442419	0.195
YER090W	TRP2	8.09764	0.704493	0.59	8.11067	0.587537	0.48	8.13406	0.0557785	NA	7.9734	0.48209	0.364	8.03246	0.281544	0.21	8.23778	0.169552	0.113	7.84906	0.236366	0.124
YER091C	MET6	7.33395	0.101012	0.046	7.48135	0.0631727	0.034	6.96563	-0.0171566	NA	7.16073	-0.0435508	NA	7.02391	0.0214792	NA	6.8194	-0.0373724	NA	6.61825	0.0187783	NA
YER092W	IES5	4.78529	-0.000845789	NA	5.50073	0.1007	NA	6.21283	-0.0102101	NA	6.02645	0.118357	0.017	5.96669	0.0902314	0.011	6.08819	0.205253	0.11	5.28339	0.0357143	NA
YER093C	TSC11	3.7491	0.295441	NA	3.97554	0.411575	0.144	4.83685	0.0558011	NA	4.74938	0.108476	NA	4.86059	0.177022	0.075	4.49418	0.280113	0.109	4.2652	-0.0218175	NA
YER094C	PUP3	7.80684	0.0450843	NA	8.00991	0.0152089	NA	8.62943	-0.00812766	NA	8.4472	0.0149116	NA	8.3961	0.0324851	0.016	8.62977	0.00961512	NA	7.9839	0.0456993	NA
YER095W	RAD51	6.06359	0.00505348	NA	7.10381	0.0227804	NA	7.03937	-0.0070322	NA	7.02224	-0.0784217	-0.019	7.0527	0.0719482	0.032	7.09888	0.0169304	NA	6.56145	0.0707567	NA
YER096W	SHC1	4.79781	0.659249	0.439	5.2669	0.526224	0.376	4.34583	0.06147	NA	4.94476	0.0268053	NA	5.0318	0.13341	0.05	4.67458	0.0718255	NA	4.87156	0.0734063	NA
YER098W	UBP9	2.01299	0.093028	NA	2.88952	0.126179	NA	3.24795	0.0744123	NA	3.63783	0.0491642	NA	3.19043	0.079232	NA	3.6176	0.0262302	NA	2.60778	-0.272805	NA
YER100W	UBC6	7.12948	0.00357061	NA	7.05266	0.00986383	NA	6.66308	0.015468	NA	6.83403	0.060931	0.022	6.85132	0.11844	0.079	6.8163	0.0154925	NA	6.58012	0.0212847	NA
YER101C	AST2	4.83827	0.226378	0.028	5.3579	0.0879122	0.003	4.59385	0.033217	NA	4.96024	0.145013	0.047	4.82406	0.189519	0.094	4.84565	0.00460032	NA	4.41658	0.117468	NA
YER102W	RPS8B	9.23022	0.267892	0.18	9.17085	0.13029	0.072	9.77229	0.0106298	NA	9.60326	0.111425	0.049	9.80296	0.168679	0.122	9.58215	0.0838473	0.042	9.13815	-0.0284638	NA
YER104W	RTT105	6.03003	0.0259372	NA	6.09474	0.0862466	NA	4.58469	-0.0644957	NA	4.91942	-0.188964	-0.048	4.62296	-0.226108	-0.096	4.7745	0.00649171	NA	4.09623	-0.136039	NA
YER105C	NUP157	4.95694	0.0140653	NA	5.80145	0.111202	NA	6.82772	0.0621307	NA	6.67472	0.151465	0.049	6.79033	0.16549	0.087	6.83234	0.107601	0.031	6.41742	0.0111345	NA
YER107C	GLE2	6.64252	0.119347	0.043	6.1545	0.303502	0.196	6.34287	0.0313033	NA	6.30835	0.0754868	0.032	6.18931	0.331685	0.242	6.44667	0.033097	0.006	7.06582	0.0105281	NA
YER109C	FLO8	4.65795	0.211536	NA	5.28367	0.168375	0.025	4.81822	0.0704938	NA	4.87235	0.0629334	NA	4.97704	0.262147	0.134	4.86345	-0.0899856	NA	4.98142	0.151464	NA
YER110C	KAP123	6.38946	-0.0248013	NA	6.8056	0.00598331	NA	7.74782	-0.00211277	NA	7.73428	0.0134422	NA	7.65178	0.0420118	0.012	7.22552	0.0686036	0.024	6.97423	0.026107	NA
YER111C	SWI4	4.50206	0.808945	0.619	4.42963	0.613974	0.435	4.50177	0.0502549	NA	4.79487	0.190703	0.072	4.60361	0.377349	0.242	4.65992	0.0537604	NA	4.40931	0.678549	0.418
YER113C	TMN3	7.03091	0.0517946	0.008	6.91862	0.0279539	NA	6.14837	0.0180812	NA	6.20813	-0.0796883	-0.018	6.21688	0.017667	NA	6.76976	0.0411541	0.008	7.04827	0.0312215	NA
YER114C	BOI2	4.7671	0.31502	NA	5.70361	0.284425	0.124	6.54467	-0.00210635	NA	6.19339	0.317789	0.183	6.1297	0.194617	0.106	6.14826	0.26658	0.144	5.83074	0.145797	NA
YER115C	SPR6	5.70187	0.114408	NA	6.22369	0.115944	0.044	6.38138	0.0204451	NA	6.00748	0.300719	0.183	6.20515	0.0755119	0.034	6.22744	0.0179808	NA	5.60437	0.000968955	NA
YER117W	RPL23B	9.84398	0.212074	0.126	10.0149	0.130258	0.07	10.724	0.0160268	NA	10.3979	0.225423	0.142	10.7108	0.174214	0.123	10.3897	0.0909194	0.051	9.95527	0.0959889	0.029
YER118C	SHO1	6.09392	0.467205	0.268	6.19319	0.466759	0.326	6.35154	-0.0348991	NA	6.11454	0.441531	0.291	6.2681	0.0547234	NA	6.28447	0.276023	0.151	5.84895	0.180765	NA
YER120W	SCS2	7.48713	0.704962	0.546	7.75344	0.640838	0.523	8.35169	0.00417036	NA	8.08513	0.523065	0.405	8.38829	0.268063	0.189	8.0911	0.280293	0.184	7.69288	0.504526	0.332
YER122C	GLO3	7.97538	-0.403708	-0.274	8.11814	-0.312168	-0.208	8.08976	-0.106415	NA	8.07916	-0.120902	-0.028	8.12508	0.156582	0.089	8.25487	-0.250698	-0.154	7.69464	-0.0617548	NA
YER124C	DSE1	5.48312	0.0124633	NA	5.36152	-0.0150593	NA	5.31544	-0.0121655	NA	5.75638	-0.123939	-0.059	5.39759	0.00376078	NA	5.55207	-0.0211577	NA	4.88806	-0.00592594	NA
YER125W	RSP5	7.16662	0.0163416	NA	7.25169	0.0198906	0.008	6.58705	0.00356688	NA	6.70851	-0.281224	-0.188	6.75827	0.00350872	NA	6.68854	-0.00158011	NA	6.36719	-0.0314717	NA
YER127W	LCP5	5.59175	0.354988	0.127	5.97669	0.342342	0.211	6.34455	-0.00999675	NA	6.2437	0.138637	0.06	5.8313	0.218417	0.13	6.05547	0.0932201	0.029	5.94684	0.172663	0.027
YER131W	RPS26B	9.75073	0.1081	0.062	9.39486	0.0210025	NA	9.7078	-0.00942492	NA	9.18242	0.251833	0.189	9.79402	0.147627	0.118	9.65657	0.0432795	0.019	9.07439	0.0430867	NA
YER133W	GLC7	2.9945	-0.269941	NA	3.27076	-0.149291	NA	3.03853	-0.0936671	NA	4.91833	-0.0609104	NA	2.82406	0.149905	NA	3.37517	0.0115807	NA	3.13669	0.0552311	NA
YER134C		4.63545	0.0232618	NA	5.34716	0.0256204	NA	5.74903	0.0100363	NA	5.22149	-0.0628641	NA	5.50389	0.0796016	0.013	5.81882	0.0303529	NA	4.73559	-0.0603971	NA
YER136W	GDI1	7.67316	0.194272	0.12	7.52822	0.111785	0.068	7.41428	0.0356134	NA	7.6727	-0.0260244	NA	7.55698	0.143217	0.107	7.79312	0.0940846	0.062	8.11452	0.0407704	0.012
YER137C		4.59769	0.122536	NA	4.71488	0.0633244	NA	5.04747	-0.00630105	NA	5.2704	0.0467689	NA	5.14841	0.0589124	0.01	4.86124	0.0109543	NA	5.25185	-0.0238907	NA
YER138W-A		6.40491	-0.178255	NA	6.67966	0.023831	NA	6.5224	-0.100608	NA	6.26536	0.121311	0.029	6.48656	-0.0352689	NA	6.37865	0.0229533	NA	6.33472	-0.161543	NA
YER139C	RTR1	2.14987	0.0823079	NA	2.54698	-0.018907	NA	2.85686	-0.0625076	NA	3.28481	0.0968742	NA	2.60816	0.141389	NA	3.1291	-0.0685082	NA	2.00915	0.443295	0.017
YER142C	MAG1	4.55052	-0.0551408	NA	5.33252	0.148155	0.004	4.56165	-0.0742981	NA	5.11844	-0.107494	NA	4.5037	0.0183712	NA	4.89417	0.0571984	NA	4.47686	-0.210462	NA
YER143W	DDI1	7.25804	0.126483	0.045	7.37385	0.135474	0.076	7.08011	0.00085225	NA	6.74654	0.149486	0.077	7.03757	0.0653189	0.031	7.18176	0.0444819	0.011	7.25535	0.0271451	NA
YER144C	UBP5	4.79276	-0.0293977	NA	5.75898	-0.0316678	NA	5.62413	0.0128298	NA	5.1989	-0.0236163	NA	5.62305	0.0885227	0.033	5.68923	0.00789207	NA	5.02954	0.0591236	NA
YER145C	FTR1	8.04494	-0.0120165	NA	8.13147	0.00469417	NA	8.15432	0.00894579	NA	8.70585	-0.0264488	NA	8.07499	0.132636	0.085	8.48021	-0.0503973	-0.026	8.66242	-0.0499415	-0.015
YER149C	NA	NA	NA	NA	NA	NA	NA	6.10176	0.00301836	NA	6.32664	0.0234187	0.002	6.0028	0.00721623	NA	NA	NA	NA	NA	NA	NA
YER152C		7.1742	-0.00220983	NA	7.37034	-0.00364515	NA	7.75305	0.000352633	NA	7.70018	0.020189	0.005	7.41183	0.00961309	NA	7.67518	0.0141729	0.001	7.4587	0.000115333	NA
YER154W	OXA1	6.57932	0.030891	NA	6.62552	-0.00143656	NA	7.23319	-0.00961889	NA	6.78047	0.0936804	0.022	6.87272	0.0309796	NA	6.90789	0.12519	0.059	6.68757	0.0351772	NA
YER156C		6.95995	0.0898506	0.022	7.2515	0.0554549	0.027	7.31534	0.00515742	NA	6.99915	0.174052	0.113	6.98718	0.0718651	0.046	7.38399	-0.000141141	NA	7.38275	0.00459026	NA
YER158C		5.43991	0.295128	0.144	5.76957	0.095552	0.043	4.8015	0.0231098	NA	5.14591	0.125466	0.054	4.99918	0.0866088	0.037	5.48098	0.0112154	NA	5.88205	0.0235648	NA
YER159C	BUR6	6.47466	0.208698	0.083	6.75035	0.0830424	0.036	6.81676	0.0182299	NA	7.08932	0.0135901	NA	6.93497	0.0508954	0.029	6.77774	0.0745744	0.04	6.42451	-0.00791829	NA
YER162C	RAD4	3.9728	0.388291	0.106	4.58891	0.0874577	NA	3.83773	0.0135721	NA	4.19042	0.0237209	NA	3.85309	0.125267	0.026	3.706	0.0262792	NA	3.85601	0.0210758	NA
YER163C	GCG1	6.16151	0.179158	NA	6.62254	0.0883987	NA	7.13284	0.0165941	NA	7.06208	-0.00299476	NA	7.0371	0.0558591	NA	6.76614	0.158659	0.073	6.39397	0.00435612	NA
YER164W	CHD1	5.34656	0.654537	0.467	5.81388	0.62601	0.492	5.38864	0.105128	NA	5.73579	0.618864	0.471	5.76547	0.539036	0.398	5.42675	0.39459	0.227	5.05141	0.291377	0.051
YER165W	PAB1	9.8164	0.0387518	0.012	10.0957	0.0567344	0.038	10.3219	0.00905228	NA	10.0731	0.00169849	NA	10.3521	0.0345213	0.02	10.113	-0.00286739	NA	9.86787	0.0340601	0.008
YER166W	DNF1	6.57319	0.072659	NA	6.83394	0.231645	0.128	7.96307	0.000918441	NA	8.11075	0.0292733	NA	7.66618	0.106145	0.066	7.35468	0.0646005	0.023	7.04492	0.0711365	NA
YER168C	CCA1	5.21187	0.341469	0.145	5.16457	0.478325	0.325	4.8306	0.10794	NA	4.94225	0.325603	0.179	4.75077	0.374711	0.23	4.95379	0.105177	0.02	4.83968	0.106597	NA
YER170W	ADK2	3.87575	-0.00929005	NA	4.0463	-0.150231	NA	3.77348	0.0347284	NA	4.19183	-0.167538	-0.033	3.86762	-0.0174589	NA	4.41528	0.0236648	NA	4.12316	-0.049535	NA
YER171W	RAD3	5.48339	0.129153	NA	6.08823	0.00154789	NA	6.02746	0.00252168	NA	5.76673	0.145491	0.066	5.97286	0.0631693	0.025	5.7776	0.0260895	NA	5.71901	0.0674957	NA
YER172C	BRR2	4.3627	0.0595986	NA	4.46819	0.0426092	NA	4.32632	-0.0123771	NA	4.38062	-0.10595	NA	4.14754	-0.070951	NA	4.27887	0.0480978	NA	4.04491	-0.123121	NA
YER175C	TMT1	3.80171	-0.0682224	NA	4.30236	0.202404	0.01	4.58332	-0.0397725	NA	4.69219	-0.0195045	NA	4.21173	0.0322345	NA	4.663	-0.096394	-0.009	3.4934	0.10023	NA
YER178W	PDA1	8.90702	0.0386146	NA	9.21638	0.0171593	NA	9.36185	-0.0199701	NA	9.17167	0.0522897	0.026	9.43532	0.0386965	0.022	9.37033	0.0167696	NA	9.1852	-0.0218076	NA
YER179W	DMC1	4.4689	0.0750507	NA	4.27413	0.0926281	NA	NA	NA	NA	5.189	0.0135733	NA	3.64999	0.076972	NA	NA	NA	NA	NA	NA	NA
YER183C	FAU1	6.27549	0.295172	0.16	6.43845	0.0125864	NA	NA	NA	NA	NA	NA	NA	6.0997	0.0115467	NA	NA	NA	NA	6.50903	0.0113747	NA
YER184C	TOG1	1.8263	0.0285232	NA	2.41258	0.0118106	NA	2.146	-0.223329	NA	2.7259	-0.162953	NA	1.94439	-0.137292	NA	2.50509	-0.0631575	NA	1.5293	-0.452858	NA
YER186C		5.12617	-0.0222594	NA	5.4087	-0.0233569	NA	5.5698	0.00824136	NA	5.66236	0.0178422	NA	5.25618	0.180483	0.083	5.16223	-0.0393953	NA	5.2248	0.120976	NA
YER187W		2.51143	0.304428	NA	1.38663	0.406391	NA	1.9729	0.128635	NA	2.04735	0.0285904	NA	1.4724	0.00830731	NA	1.49495	0.380455	NA	1.94279	0.395142	NA
YFL001W	DEG1	5.8333	0.00892178	NA	NA	NA	NA	NA	NA	NA	NA	NA	NA	4.42848	0.145835	0.066	3.85264	0.0631479	NA	NA	NA	NA
YFL002C	SPB4	5.04746	0.0719997	NA	5.27334	0.0121682	NA	NA	NA	NA	NA	NA	NA	4.661	0.0290048	NA	5.24333	0.0114585	NA	NA	NA	NA
YFL004W	VTC2	6.69209	0.360378	0.184	6.73816	0.504037	0.373	6.83161	0.058051	NA	6.12987	0.619093	0.471	6.84787	0.348772	0.243	6.92665	0.155268	0.076	6.27168	0.253452	0.058
YFL005W	SEC4	7.06294	0.0940629	0.039	7.24061	0.0359958	0.016	NA	NA	NA	6.79817	0.0982649	0.058	6.68114	0.0391964	0.021	NA	NA	NA	NA	NA	NA
YFL009W	CDC4	6.49714	0.100693	0.02	6.53407	0.0761961	0.03	6.39728	0.0166149	NA	6.62185	0.0237877	0.002	6.46259	0.080498	0.049	6.78913	-0.000247144	NA	6.65395	0.0138931	NA
YFL010C	WWM1	9.36788	0.0103384	NA	9.40453	0.00279961	NA	9.53231	0.00177773	NA	9.28824	0.0237105	0.013	9.52372	0.0132172	0.008	9.50052	0.00258093	NA	9.36623	4.14113e-05	NA
YFL013C	IES1	5.79505	0.147878	NA	5.596	0.154795	0.021	5.09188	-0.0108575	NA	5.18889	0.0304896	NA	5.18658	0.10401	NA	5.08483	-0.074688	NA	5.31063	-0.180752	-0.008
YFL014W	HSP12	12.9469	-0.0172195	NA	12.8237	0.00558221	NA	11.37	0.00796166	NA	12.0702	0.0123011	NA	11.985	0.0202186	0.004	12.3322	-0.000628681	NA	12.8106	-0.00605124	NA
YFL017C	GNA1	7.47376	0.210658	0.083	7.03858	0.176344	0.073	7.93085	0.139674	0.009	7.76281	0.206917	0.115	7.42553	0.311817	0.218	7.37685	0.312948	0.205	7.10711	0.206918	0.056
YFL021C-A		3.27506	0.366272	0.153	3.09077	0.275689	0.063	3.34966	0.0758912	NA	2.73157	-0.175047	NA	2.60936	-0.0352089	NA	2.26441	0.316138	0.082	3.649	0.321124	0.092
YFL022C	FRS2	9.36949	0.0376638	0.014	9.74525	0.00333594	NA	10.0981	0.00186914	NA	10.0735	0.028741	0.019	10.1312	0.00950932	0.006	10.0009	0.00574011	0.002	9.83988	0.00271316	NA
YFL023W	BUD27	4.7473	0.0611105	NA	5.45696	0.0680805	NA	5.76741	0.00371392	NA	5.76342	0.0540024	NA	5.77353	0.0166193	NA	5.71708	0.0172196	NA	5.69449	0.0251846	NA
YFL025C	BST1	4.22578	0.433711	0.112	4.59505	0.160089	0.019	4.74642	0.0423352	NA	4.56036	0.0484022	NA	4.73331	0.141812	0.059	4.85366	0.0708803	NA	4.39522	0.126923	NA
YFL026W	STE2	6.90725	0.439354	0.276	6.10247	0.0494637	NA	7.36094	0.0495056	NA	7.78248	0.0290755	NA	7.33898	0.208449	0.129	7.41931	0.139043	0.055	7.17514	0.0922931	NA
YFL031W	HAC1	4.83297	-0.1062	NA	5.29196	-0.0501669	NA	5.67202	-0.000823569	NA	5.4493	-0.102484	-0.037	5.55555	0.00707519	NA	5.27845	-0.0327087	NA	6.20606	0.00275413	NA
YFL033C	RIM15	5.75623	0.35817	0.203	5.63053	0.118519	0.022	4.88345	-0.0199147	NA	5.08071	-0.0309403	NA	5.03345	0.0937205	0.02	5.28205	-0.00185651	NA	5.57739	-0.0311288	NA
YFL034C-A	RPL22B	8.43364	0.0813824	0.038	8.77845	0.0176639	0.005	8.51023	0.000556093	NA	8.42631	0.0110661	NA	8.43628	0.0238458	0.013	8.32259	0.000354566	NA	8.03429	0.0117041	NA
YFL034C-B	MOB2	6.88153	0.362566	0.239	6.8384	0.113633	0.044	6.1451	0.0565191	NA	6.02294	-0.110106	NA	6.17568	0.182641	0.113	6.737	0.120596	0.054	6.51384	0.0901494	NA
YFL036W	RPO41	5.81151	0.518633	0.323	5.82783	0.442642	0.306	5.17165	0.0921288	NA	5.29278	0.0836588	NA	5.28039	0.300112	0.183	5.47053	0.10862	0.022	5.02594	0.00733883	NA
YFL037W	TUB2	8.28993	0.15725	0.1	8.05098	0.130371	0.09	7.68406	0.0173786	NA	7.79329	0.356472	0.261	7.82033	0.126181	0.096	8.35818	0.017049	0.002	8.43437	0.0193926	NA
YFL038C	YPT1	9.67471	0.173895	0.119	9.68907	0.117436	0.084	10.5507	0.0120121	0.003	10.7198	0.0693512	0.051	10.5383	0.0596662	0.048	10.3799	0.0438344	0.034	10.2064	0.0391704	0.021
YFL039C	ACT1	10.4738	0.466329	0.365	10.3768	0.496426	0.398	10.7027	0.0485248	NA	10.5088	0.49134	0.374	10.8175	0.257335	0.19	10.6644	0.152638	0.1	10.1187	0.213443	0.118
YFL041W	FET5	5.05861	0.059522	NA	5.25685	0.0651307	NA	4.55814	-0.0190367	NA	5.01191	0.0197241	NA	4.40361	0.0539968	NA	4.73255	0.00349105	NA	4.82176	0.0240052	NA
YFL041W-A		3.73669	0.328594	0.023	4.18423	0.121139	NA	2.90963	-0.0257696	NA	3.67874	0.31865	0.105	3.49029	0.489728	0.257	3.28031	-0.0197637	NA	3.55681	0.2626	NA
YFL044C	OTU1	2.8973	0.274847	0.083	3.85445	0.0627611	NA	3.73981	0.073177	NA	4.39399	-0.0510764	NA	3.01773	-0.0314416	NA	4.10084	-0.17466	NA	3.73703	-0.161748	NA
YFL045C	SEC53	8.714	0.0299558	0.004	8.97901	0.000514258	NA	9.76838	0.00472364	NA	9.49016	0.0317459	0.019	9.7562	0.0200956	0.014	9.71043	0.00341499	NA	8.94454	0.03112	0.007
YFL047W	RGD2	6.83479	0.169507	0.029	6.70607	0.10729	0.008	6.53979	0.0176546	NA	6.76317	-0.00668677	NA	6.79011	0.117858	0.051	6.83038	-0.0355153	NA	6.23956	-0.0920681	NA
YFL049W	SWP82	6.5514	0.140995	0.037	6.84433	0.15799	0.097	7.02162	0.02115	NA	7.08032	0.0478755	0.013	7.04201	0.0720153	0.043	6.88844	0.0876415	0.046	6.7886	0.0532314	NA
YFL057C	AAD16	5.5437	0.580533	0.382	6.04277	0.3806	0.244	5.15299	0.1292	NA	5.46171	0.521245	0.359	5.47189	0.497818	0.351	5.3341	0.0961218	NA	3.89938	0.493781	0.114
YFL059W	SNZ3	4.40957	0.426526	0.182	4.13754	0.237223	0.071	3.83016	-0.0171262	NA	3.86532	0.130904	NA	3.88192	0.146491	0.03	3.96111	0.0150934	NA	3.47077	-0.0184015	NA
YFL060C	SNO3	1.94609	0.152613	NA	2.56697	0.0813053	NA	2.48112	-0.0152841	NA	2.55518	0.120532	NA	1.90235	-0.0644096	NA	2.79167	-0.0105362	NA	1.37881	0.121801	NA
YFR001W	LOC1	5.83023	0.278471	0.093	6.27553	0.112903	0.047	6.48519	0.0130972	NA	6.50261	0.02086	NA	6.44722	0.0819998	0.046	6.53893	0.0295497	NA	6.09684	0.00570622	NA
YFR003C	YPI1	5.94973	0.101563	NA	5.81101	0.135334	0.056	5.56089	0.00448544	NA	5.77743	0.108033	0.042	5.49006	0.140392	0.075	5.75552	0.0341939	NA	5.84847	0.025781	NA
YFR004W	RPN11	7.42021	0.115098	0.057	7.42262	0.0975385	0.064	6.76977	0.00575325	NA	7.07603	0.0831291	0.051	6.89	0.0399468	0.023	6.96982	0.00622989	NA	NA	NA	NA
YFR005C	SAD1	5.27346	0.0401471	NA	5.7286	-0.00736164	NA	5.40363	0.0204844	NA	5.67677	0.0187605	NA	5.27038	0.0399828	NA	5.52995	0.0071655	NA	5.21453	0.011726	NA
YFR007W	YFH7	5.07781	0.355851	0.134	5.57551	0.185101	0.088	5.69989	0.00580745	NA	5.295	0.0630104	0.004	5.3804	0.0489039	0.01	5.23856	0.0673316	0.013	5.10767	0.0657161	NA
YFR009W	GCN20	6.57744	0.273226	0.113	7.14288	0.288175	0.183	6.89725	-0.0129645	NA	7.17621	-0.00297638	NA	6.76994	0.133826	0.071	7.06619	-0.00299807	NA	6.47841	0.0144995	NA
YFR010W	UBP6	8.47459	0.0536017	0.022	8.58364	0.0325973	0.015	7.61412	-0.00336305	NA	8.13627	0.0471041	0.025	7.76366	0.0512071	0.032	8.00825	0.0103553	NA	8.31805	-0.00171881	NA
YFR011C	MIC19	5.73702	0.0495013	NA	5.54911	0.0244598	NA	5.49057	0.000163931	NA	5.35501	0.178971	0.08	5.41264	0.0517658	0.007	5.56791	0.0501637	NA	5.53472	0.00672028	NA
YFR013W	IOC3	5.01423	0.318519	0.063	5.45398	0.286171	0.144	5.73149	0.0239329	NA	5.59473	0.282436	0.156	5.82445	0.198977	0.121	5.73592	0.220327	0.118	5.31953	0.242822	0.038
YFR014C	CMK1	5.89655	0.122702	NA	5.88435	0.0320215	NA	6.05021	0.00986928	NA	5.95893	0.0530667	NA	6.28117	0.06193	0.028	6.01459	0.0143326	NA	5.74614	-0.0274556	NA
YFR016C		5.82001	-0.0157954	NA	6.30982	-0.0236404	NA	7.01993	-0.0135539	NA	6.74841	0.0315881	NA	6.68389	0.0239454	NA	6.97963	-0.0226211	NA	6.20744	0.0254952	NA
YFR018C		5.31139	0.0498988	NA	5.82112	0.0955359	0.032	5.88594	0.00187123	NA	5.7459	0.011909	NA	5.93071	0.0322134	0.006	6.00098	0.00330994	NA	5.65489	-0.00351258	NA
YFR021W	ATG18	5.42939	-0.0308806	NA	6.26009	0.0337989	NA	6.38707	-0.00993375	NA	6.30244	0.0470679	NA	6.25714	0.103742	0.055	6.33138	0.0112019	NA	5.97905	0.108017	NA
YFR022W	ROG3	4.53195	0.358365	0.149	5.144	0.274744	0.126	4.97171	0.0119949	NA	5.22385	0.174215	0.038	5.01912	0.256728	0.131	4.87953	0.0847484	NA	4.76359	0.109547	NA
YFR024C-A	LSB3	7.63042	0.158607	0.054	7.84665	0.257559	0.168	7.07941	0.0855892	NA	7.54254	-0.014319	NA	7.1076	0.231194	0.153	7.23547	0.0329857	NA	7.02345	0.212001	0.084
YFR030W	MET10	5.32532	0.12284	NA	5.75455	0.0233265	NA	5.61532	-0.00182012	NA	5.73745	0.0791034	0.028	5.47629	0.0826043	0.036	5.27018	0.00393946	NA	5.35302	0.0358696	NA
YFR031C	SMC2	4.9376	0.678309	0.449	5.19866	0.533344	0.369	5.13204	0.0860415	NA	5.3353	0.201678	0.087	5.19562	0.404322	0.269	5.57899	0.142552	0.06	5.4008	0.27881	0.086
YFR031C-A	RPL2A	9.56337	0.150944	0.052	9.81639	0.0574303	NA	10.7471	-0.0310057	NA	10.6329	0.00516027	NA	10.494	0.043031	NA	10.1468	0.129744	0.066	9.74208	-0.0652407	NA
YFR032C-A	RPL29	10.4119	0.00924976	NA	10.4187	0.00392764	NA	11.2671	-0.00167779	NA	10.9456	0.000376969	NA	11.088	-0.00135659	NA	10.7372	-0.000347152	NA	10.3415	0.000728315	NA
YFR033C	QCR6	8.48988	0.0214282	0.005	8.39154	0.00698665	0	7.89489	0.00075515	NA	NA	NA	NA	7.66031	0.028229	0.016	NA	NA	NA	NA	NA	NA
YFR034W-A		5.92702	0.28863	0.066	6.02039	0.190193	0.054	6.68497	-0.0810573	NA	6.06644	-0.0290078	NA	6.17372	-0.0319934	NA	5.81486	-0.0652864	NA	5.7887	0.150778	NA
YFR038W	IRC5	6.40402	0.0360398	NA	6.72602	0.00518104	NA	6.76798	-0.00588492	NA	6.77224	0.0306726	0.007	6.66258	0.0169164	NA	6.71397	-0.00222573	NA	6.68245	-0.00369389	NA
YFR040W	SAP155	5.74935	0.402737	0.205	5.90492	0.420346	0.279	5.35939	0.115167	NA	5.57852	0.263423	0.123	5.65777	0.477826	0.335	5.52456	0.178076	0.053	5.34177	0.39057	0.16
YFR041C	ERJ5	4.69799	-0.00387832	NA	4.76826	0.0332938	NA	4.89526	-0.00273282	NA	5.08765	0.0452899	NA	4.92461	0.0261151	NA	5.35282	0.0519384	NA	4.74777	-0.00840516	NA
YFR042W	KEG1	6.46307	0.00932336	NA	6.66318	0.0327074	NA	7.14174	-0.00164538	NA	6.56376	0.0306673	NA	7.09907	0.00958278	NA	7.25743	0.0194104	0	6.84096	-0.00772062	NA
YFR045W		3.80793	0.256725	NA	5.12005	0.138881	0.034	4.97609	0.0355505	NA	5.05499	0.0930591	0.01	4.99737	0.130284	0.054	5.25347	0.0450416	NA	4.94641	0.126388	NA
YFR046C	CNN1	4.20973	0.123399	NA	4.73093	0.27724	0.11	4.45515	0.0547308	NA	4.60981	0.306935	0.135	4.55644	0.0859484	NA	4.57995	0.112864	NA	4.27117	0.0410268	NA
YFR049W	YMR31	5.72781	0.00666839	NA	5.74809	0.0551505	NA	6.33348	-0.036177	NA	5.57947	-0.122023	NA	6.3369	-0.0243023	NA	6.20523	0.0439784	NA	5.89411	-0.0205856	NA
YFR050C	PRE4	8.34437	0.0948997	0.049	8.42034	0.0908608	0.054	7.1951	-0.000958261	NA	7.48265	0.000435326	NA	7.17259	0.0209491	NA	7.79946	0.0681542	0.034	8.03226	0.0943701	0.047
YFR052C-A		9.5416	0.0766873	0.047	9.14437	0.085565	0.057	9.29294	0.0136048	0.003	9.60651	0.0336296	0.022	9.8211	0.0797301	0.064	10.195	0.004681	0.002	9.50837	0.00250279	NA
YFR052W	RPN12	7.35335	0.59259	0.447	7.95393	0.545024	0.441	7.42654	0.154615	NA	7.3987	0.531437	0.41	7.47284	0.422278	0.316	7.65289	0.258049	0.149	7.46768	0.439863	0.283
YGL001C	ERG26	7.16436	0.605084	0.464	6.8782	0.634517	0.521	6.86144	0.0968808	NA	6.99932	0.411183	0.28	6.94564	0.388776	0.279	6.8479	0.150708	0.064	6.47722	0.274759	0.091
YGL002W	ERP6	5.815	0.0214454	NA	5.91689	-0.0431293	NA	5.68405	-0.00868565	NA	5.91931	-0.054345	-0.009	5.69999	0.00106263	NA	5.87997	0.00559415	NA	5.33913	-0.00409556	NA
YGL003C	CDH1	4.52302	0.159469	NA	5.67618	0.151813	0.031	5.54609	0.00471824	NA	5.30314	0.0594082	NA	5.46348	0.238881	0.133	5.48611	-0.0163493	NA	5.00105	0.164367	NA
YGL004C	RPN14	3.27751	-0.0491544	NA	3.84983	0.322881	0.076	4.15008	0.0137754	NA	3.82625	0.0670054	NA	3.95564	0.236174	0.069	4.31233	0.008924	NA	3.57181	-0.00446514	NA
YGL005C	COG7	4.10982	-0.0383049	NA	4.7334	-0.00581228	NA	4.36773	-0.0243313	NA	4.16957	-0.146303	-0.027	4.25487	0.058157	NA	4.5731	-0.0792441	-0.012	4.20123	-0.08497	NA
YGL006W	PMC1	5.87764	0.275062	0.07	6.24522	0.208107	0.083	6.14657	-0.101844	NA	5.86817	0.245927	0.102	6.14961	0.141449	0.05	6.04766	0.0955778	NA	5.72039	0.085168	NA
YGL007C-A		0.98453	0.232672	NA	2.27184	-0.131896	NA	2.27671	-0.0932994	NA	2.50254	0.430044	0.145	1.49607	-0.218729	NA	2.31569	-0.00535335	NA	1.17547	0.349997	NA
YGL008C	PMA1	5.68166	0.371564	0.139	5.33085	0.142193	NA	6.05751	-0.0448763	NA	7.77295	-0.24566	-0.145	5.68194	0.13865	0.036	6.06272	-0.0460037	NA	5.93203	-0.0812533	NA
YGL009C	LEU1	7.14453	0.0100698	NA	7.121	0.0100168	NA	7.24359	0.0135709	NA	6.25772	0.0423416	NA	7.21079	0.0912342	0.057	6.80828	0.00772861	NA	6.42865	0.0536158	NA
YGL010W	MPO1	6.29575	0.118738	0.02	6.84311	0.0153613	NA	6.39148	-0.00106835	NA	6.61071	0.0462891	0.017	6.69527	0.0384658	0.018	6.61341	0.0160475	NA	6.77681	-0.00262937	NA
YGL011C	SCL1	9.37821	0.0652701	NA	9.21148	0.183928	0.095	8.75136	0.00541712	NA	8.68647	0.237511	0.134	8.86785	0.187758	0.118	8.91754	0.0892997	0.034	8.59482	0.169839	0.057
YGL013C	PDR1	6.18376	-0.0184565	NA	6.76447	0.0496433	NA	6.43731	-0.00186438	NA	6.59474	0.0624572	0.014	6.50079	0.0534255	0.017	6.45107	0.0182443	NA	6.2299	0.0582542	NA
YGL014W	PUF4	6.62122	0.166147	0.071	6.80361	0.119173	0.066	6.60242	0.0218191	NA	6.60854	0.118334	0.066	6.76477	0.117556	0.082	6.56869	0.0290914	0.007	6.52544	0.0437296	NA
YGL016W	KAP122	6.12801	0.0479557	NA	5.9798	0.049014	NA	6.0235	0.0178444	NA	6.10448	-0.0296337	NA	6.14291	0.0468512	NA	5.9663	-0.00664386	NA	5.73804	0.0144867	NA
YGL017W	ATE1	4.6605	0.354787	0.076	4.98828	0.367172	0.199	5.34488	0.0497655	NA	5.45418	0.10785	0.033	5.25922	0.189895	0.107	5.13252	0.0884997	0.006	5.17307	0.0869315	NA
YGL018C	JAC1	5.09876	-0.0360511	NA	5.63054	0.0600257	NA	6.22878	0.0608179	NA	5.45843	0.0611236	NA	5.984	0.0850861	0.015	5.91914	0.206965	0.096	5.60833	0.138165	NA
YGL021W	ALK1	5.69039	0.235917	0.034	5.88625	0.220853	0.088	5.95	-0.0811603	NA	6.22907	0.056727	NA	6.16414	0.0307406	NA	6.0834	0.250449	0.126	6.1848	0.181437	0.02
YGL022W	STT3	7.4135	0.242918	0.088	7.85818	0.208035	0.097	8.47375	-0.0317283	NA	8.05259	0.25711	0.142	8.32118	0.233625	0.149	8.24471	0.135922	0.059	7.7127	0.0506249	NA
YGL028C	SCW11	6.04041	0.0279112	NA	6.24398	0.0146434	NA	6.08239	-0.0268754	NA	6.20194	-0.175829	-0.094	5.92038	0.0130642	NA	6.03066	0.0152659	NA	5.4998	-0.0235703	NA
YGL030W	RPL30	10.095	0.179971	0.114	9.83427	0.0979399	0.059	10.5034	0.00665072	NA	10.2805	0.114855	0.073	10.4721	0.091871	0.065	10.4211	0.00873339	NA	10.0806	0.0310323	0.002
YGL031C	RPL24A	8.4311	0.543364	0.403	8.22182	0.603928	0.486	8.92105	0.0449953	NA	9.01099	0.25527	0.16	8.76416	0.447995	0.35	8.82385	0.0649099	0.019	8.10538	0.395984	0.24
YGL032C	AGA2	6.14009	0.0603222	NA	5.31428	0.0429609	NA	5.95939	0.0036848	NA	6.16471	0.0448242	0.005	5.80708	0.0553564	0.017	5.71383	0.102027	0.039	5.30464	0.0362914	NA
YGL036W		5.10247	0.0449043	NA	4.83669	0.118404	0.032	4.03439	-0.00925036	NA	4.09954	0.0260428	NA	4.15381	0.00802621	NA	4.37454	0.0201334	NA	3.89124	0.023333	NA
YGL038C	OCH1	6.95199	0.226665	0.088	7.55433	0.0950202	NA	7.60016	0.00826586	NA	8.23574	-0.0388169	NA	7.65174	0.217445	0.142	7.48523	-0.0473692	NA	7.42288	0.187484	0.057
YGL039W	NA	NA	NA	NA	7.24161	0.00961697	NA	7.68661	0.00132735	NA	7.65551	0.0156346	0.004	7.70296	0.00836502	0.002	7.39551	0.00988385	NA	NA	NA	NA
YGL043W	DST1	5.40548	0.118077	NA	5.64473	0.202286	0.08	5.79239	0.0330697	NA	5.4473	0.173909	0.058	5.60688	0.0440275	NA	5.79841	0.0589365	NA	5.11863	-0.0306079	NA
YGL044C	RNA15	5.24747	0.240072	0.036	5.66371	0.279161	0.144	5.11418	0.0986846	NA	5.29329	0.0748168	NA	5.40179	0.271396	0.155	5.26403	0.1544	0.026	5.0746	0.191438	NA
YGL045W	RIM8	6.36177	0.452097	0.287	6.922	0.308405	0.215	6.03695	0.0625053	NA	5.99228	0.414463	0.28	6.1338	0.338791	0.241	6.19641	0.205601	0.116	6.04103	0.222605	0.067
YGL047W	ALG13	5.06865	0.0128663	NA	6.04286	0.158724	0.053	6.83331	-0.00339814	NA	6.58313	0.0973553	0.031	6.39197	-0.0259594	NA	6.63139	0.0320541	NA	6.2351	0.190826	0.038
YGL048C	RPT6	7.57268	0.136219	0.066	8.19094	0.111191	0.074	7.78828	0.017063	NA	7.88658	0.0679002	0.04	7.76209	0.0855772	0.061	7.85209	0.0147464	0.002	7.80487	0.0623515	0.02
YGL049C	TIF4632	6.13384	0.0345104	NA	6.42583	0.0378815	0.002	6.5244	0.0205993	NA	5.84816	-0.035543	NA	6.39559	-0.0160484	NA	6.43025	0.0155091	NA	5.69473	0.00531638	NA
YGL050W	TYW3	2.96324	0.331425	NA	3.37625	0.073657	NA	4.80551	0.0244084	NA	4.06362	0.00919155	NA	4.25412	0.197929	0.068	4.44423	0.0863449	NA	3.84485	0.147136	NA
YGL054C	ERV14	6.85036	0.037121	0.017	6.63762	-0.00424187	NA	7.21544	0.0104514	NA	7.24182	-0.0649078	-0.024	7.1614	-0.00321465	NA	7.12499	0.00724113	NA	7.30811	-0.00822401	NA
YGL055W	OLE1	8.82999	0.0622924	NA	9.28376	0.0767029	0.027	10.056	0.00878772	NA	9.75116	0.123846	0.068	10.1122	0.139497	0.099	8.8281	0.0645399	0.023	8.53984	0.103549	NA
YGL056C	SDS23	6.02493	0.00344907	NA	6.21217	-0.00694197	NA	5.85395	0.000316643	NA	5.89846	0.0733644	0.026	5.76176	0.0287798	NA	5.96542	-0.00208084	NA	5.79444	0.000140978	NA
YGL059W	PKP2	4.00359	-0.0480937	NA	4.84032	-0.0464181	NA	4.53782	-0.0538082	NA	4.92721	-0.0915979	NA	4.70011	0.0326399	NA	5.02471	-0.0640689	NA	3.7071	0.114846	NA
YGL060W	YBP2	3.22325	0.245354	NA	3.99108	0.26459	0.051	4.27938	0.0724103	NA	4.09658	0.229691	0.045	3.72167	0.0842503	NA	4.15074	0.0543983	NA	3.64123	0.25248	NA
YGL061C	DUO1	5.06343	0.211379	NA	5.21896	0.0933037	NA	5.66756	-0.0428506	NA	5.59896	0.0260435	NA	5.60297	0.118862	0.046	5.62596	-0.0411349	NA	5.43126	0.00779963	NA
YGL062W	PYC1	8.14926	0.317203	0.22	8.47753	0.312866	0.231	7.01582	0.102776	NA	7.49404	0.170278	0.082	7.12478	0.233687	0.162	7.50627	0.255161	0.173	7.73062	0.297959	0.193
YGL064C	MRH4	5.22942	0.162189	NA	5.52181	0.21617	0.083	6.08049	-0.0250601	NA	6.00323	0.127062	0.045	5.96289	0.116208	0.054	5.8457	0.0205525	NA	5.4814	0.053518	NA
YGL065C	ALG2	5.64273	0.0502422	NA	6.04152	0.0536662	NA	6.64524	0.00106472	NA	6.17478	0.00645062	NA	6.62396	0.0456703	0.02	6.63972	0.0508834	0.019	6.34825	0.00903289	NA
YGL066W	SGF73	5.6051	0.457821	0.232	6.12669	0.43	0.289	5.97186	0.106457	NA	5.78051	0.36613	0.207	5.95286	0.340621	0.218	5.86495	0.31338	0.168	5.53626	0.345604	0.099
YGL067W	NPY1	6.5672	0.574192	0.402	7.00147	0.408472	0.304	6.71516	0.0257436	NA	6.57316	0.155117	0.087	6.71261	0.186262	0.13	6.59474	0.0292404	NA	6.38499	0.17185	0.051
YGL068W	MNP1	6.87132	0.218608	0.098	6.94912	0.195459	0.11	6.92517	0.0289476	NA	7.13256	0.172084	0.087	7.13063	0.213356	0.148	7.10273	-0.00219542	NA	6.67662	0.0989669	NA
YGL070C	RPB9	4.28582	0.411803	0.166	4.90267	0.182475	0.016	5.06633	-0.0064061	NA	5.13572	0.104537	NA	4.91618	0.192624	0.068	4.95414	0.0433873	NA	4.56744	0.183554	NA
YGL071W	AFT1	6.15194	0.28175	0.136	6.39653	0.275326	0.187	5.80084	0.0218016	NA	5.98539	0.134755	0.071	5.8452	0.0552709	0.019	5.90503	0.0137891	NA	5.47635	0.0556199	NA
YGL073W	HSF1	7.84148	0.0123649	NA	8.05956	0.0617721	0.031	8.49272	0.00778387	NA	8.76882	0.00208624	NA	8.36351	0.0900459	0.065	8.49382	-0.00039021	NA	8.36128	0.0135298	NA
YGL076C	RPL7A	10.3563	0.127289	0.091	10.2911	0.0456693	0.031	10.1928	0.00365293	NA	10.1851	0.00420352	0	10.1714	0.0374692	0.029	10.3261	-0.00127192	NA	10.5085	0.00326394	NA
YGL077C	HNM1	6.60535	0.360629	0.202	6.57127	0.300569	0.189	6.50237	0.0344572	NA	6.42953	0.530207	0.394	6.38653	0.362697	0.258	6.54909	0.145453	0.07	6.11048	0.196371	0.038
YGL078C	DBP3	6.72489	0.0708236	0.012	NA	NA	NA	6.65847	0.00228977	NA	6.6571	0.0709294	0.034	6.50526	0.0174294	0.001	6.65897	0.0230367	0.004	NA	NA	NA
YGL082W		5.77011	0.197907	0.094	6.23525	0.201531	0.124	5.70682	0.0530564	NA	5.93201	0.0582552	NA	5.86839	0.148718	0.079	5.81038	0.102532	0.024	5.6357	0.159307	0.039
YGL084C	GUP1	5.52856	0.30401	0.053	6.00134	0.32279	0.18	6.40031	0.0747887	NA	6.10608	0.423588	0.277	6.414	0.272371	0.179	6.30986	0.222769	0.12	5.5322	0.280329	0.039
YGL089C	NA	NA	NA	NA	1.34553	0.0345748	NA	NA	NA	NA	NA	NA	NA	NA	NA	NA	NA	NA	NA	NA	NA	NA
YGL091C	NBP35	5.67768	0.218615	NA	6.27945	0.189393	0.066	6.11397	-0.0598836	NA	6.15845	0.0299326	NA	6.00225	0.099852	0.011	6.10735	0.0647184	NA	6.07198	-0.0409556	NA
YGL092W	NUP145	6.45606	0.285851	0.099	7.08714	0.193946	0.078	7.27972	-0.0546561	NA	6.9795	0.120316	0.011	7.206	0.100795	0.028	6.96972	0.149752	0.059	7.16322	-0.17453	-0.045
YGL095C	VPS45	5.55608	0.132219	NA	5.73562	0.203776	0.068	5.01882	-1.81716e-05	NA	5.13474	-0.0522693	NA	5.00689	0.0421805	NA	5.04736	0.222462	0.071	4.68822	0.0275802	NA
YGL096W	TOS8	4.66058	-0.288393	NA	5.72871	0.0763004	NA	5.03624	-0.043127	NA	4.75666	-0.047552	NA	4.9494	0.0474381	NA	5.21798	-0.0659718	NA	4.6759	-0.146051	NA
YGL097W	SRM1	6.08679	0.131163	NA	6.42813	0.0769774	0.005	7.48863	-0.00945776	NA	7.05302	0.0544552	0.015	7.19308	0.0112077	NA	6.93658	0.029554	NA	6.65724	0.0641411	NA
YGL098W	USE1	1.91788	-0.12063	NA	3.4892	-0.0596244	NA	3.22854	0.0114115	NA	4.48289	-0.251891	-0.082	2.92703	0.0394804	NA	3.46161	-0.0186575	NA	2.07385	-0.555608	-0.109
YGL099W	LSG1	4.56455	0.029035	NA	5.15544	-0.00155059	NA	5.0882	-0.0272212	NA	5.3232	0.195706	0.079	5.04485	0.227279	0.119	5.19885	0.0712082	NA	4.73063	0.149277	NA
YGL100W	SEH1	6.38782	0.11571	0.009	6.65253	0.0961019	0.041	7.08611	0.00219045	NA	6.99791	0.0267122	0.004	6.87815	0.0581276	0.033	6.89877	0.0158378	NA	6.51504	0.0356687	NA
YGL103W	RPL28	10.8464	0.0479855	0.028	10.742	0.0281629	0.016	11.3796	-0.00147579	NA	11.1108	0.0245653	0.014	11.3406	0.0346497	0.026	11.1347	-0.00521882	-0.002	10.9031	0.0129798	0.002
YGL106W	MLC1	5.91077	0.313431	0.163	5.9184	0.279681	0.175	5.37508	0.051396	NA	5.89412	-0.0259759	NA	5.34317	0.109213	0.015	5.51548	0.260247	0.138	5.95571	0.251534	0.114
YGL110C	CUE3	6.67547	0.0604686	NA	6.80564	0.177705	0.094	6.97748	0.00297398	NA	6.71512	0.0217913	NA	6.90275	0.0585442	0.024	6.88649	0.0434686	0.006	6.71606	0.00515498	NA
YGL111W	NSA1	4.84025	0.224091	NA	5.23531	0.178411	0.064	5.6205	0.0429504	NA	5.33564	0.187866	0.083	5.5916	0.123706	0.065	5.71534	0.164021	0.085	5.40118	0.240807	0.06
YGL112C	NA	NA	NA	NA	7.21514	0.0188437	NA	7.74226	0.00400708	NA	7.62582	0.0275395	0.011	7.78711	0.0267286	0.016	7.56159	0.00738253	NA	7.31921	0.0200295	NA
YGL114W		5.06602	0.0650443	NA	5.1866	0.101686	NA	4.66235	0.0284087	NA	4.89754	-0.0185795	NA	4.85768	0.209859	0.101	4.56624	-0.0351245	NA	4.48877	-0.0313528	NA
YGL115W	NA	NA	NA	NA	7.40893	0.0283273	0.009	NA	NA	NA	7.25349	0.0836561	0.05	7.29386	0.0358578	0.021	7.25482	0.014178	0.003	NA	NA	NA
YGL117W		3.86232	0.176795	NA	4.99783	0.109922	NA	5.35678	-0.00349743	NA	5.0444	0.0221373	NA	4.86617	0.163648	0.066	5.51	0.0291279	NA	4.57933	0.0257357	NA
YGL119W	COQ8	5.05835	0.718504	0.499	5.41856	0.563178	0.409	4.83346	0.118947	NA	5.21843	0.0463229	NA	5.17744	0.480963	0.329	5.0912	0.0590793	NA	4.67981	0.358335	0.079
YGL120C	PRP43	6.512	0.0259325	NA	6.41886	0.0545762	0.005	7.39119	0.00610093	NA	7.02383	0.0547342	0.025	6.90826	0.0681758	0.041	6.99369	0.0206173	0.003	6.97042	0.031389	NA
YGL121C	GPG1	4.83782	-0.0113957	NA	5.23836	0.113292	0.064	5.10165	0.0404198	NA	5.19189	-0.0834783	NA	5.41333	0.0347911	NA	5.18346	0.0801397	0.018	5.1248	0.0122802	NA
YGL122C	NAB2	6.49429	0.00656216	NA	7.62857	0.0659831	0.019	7.39985	-0.00137387	NA	7.57923	0.0253435	NA	6.72198	-0.0225804	NA	6.99322	0.00748034	NA	6.26198	0.165157	NA
YGL123W	RPS2	10.2879	0.124705	0.092	10.0879	0.0136783	0.007	10.2039	0.000731589	NA	10.0776	0.0579493	0.041	10.0767	0.0448066	0.035	10.2852	0.00113315	NA	10.2156	0.00467763	NA
YGL124C	MON1	4.68718	0.14778	NA	4.4648	0.247086	0.081	3.90636	0.0266734	NA	4.04322	0.0682466	NA	4.04245	0.226472	0.08	4.33227	0.0418838	NA	4.71417	-0.0397233	NA
YGL126W	SCS3	4.59598	0.252439	NA	4.96207	0.0643987	NA	5.7003	-0.0134323	NA	4.93863	0.0127292	NA	5.29759	0.018946	NA	5.81235	0.055508	0.004	5.58788	0.0382528	NA
YGL127C	SOH1	6.29512	0.163505	0.033	6.6345	0.0461224	0.005	7.03293	-0.00237526	NA	6.85017	0.00684813	NA	6.67877	0.00509659	NA	7.14062	-0.00712674	NA	6.83493	-0.00390826	NA
YGL130W	CEG1	5.93471	0.660759	0.445	6.3372	0.610087	0.476	6.67968	-0.00385239	NA	6.17757	0.433757	0.293	6.58866	0.225871	0.154	6.35646	0.12899	0.06	6.17175	0.184847	0.036
YGL131C	SNT2	2.5673	0.212099	NA	3.25567	0.147867	NA	2.89504	0.0491472	NA	3.53243	0.105781	NA	2.42803	0.0284985	NA	3.34871	0.0827369	NA	2.76229	-0.00833346	NA
YGL132W	NA	NA	NA	NA	1.57886	0.347809	NA	NA	NA	NA	3.15785	0.172944	NA	2.39508	0.188607	NA	1.50588	0.122083	NA	NA	NA	NA
YGL134W	PCL10	5.27714	0.0106416	NA	5.887	0.0139006	NA	5.02572	0.0111715	NA	5.6556	0.17935	0.091	4.97689	0.114818	0.04	5.20983	0.00197805	NA	4.86893	0.0605383	NA
YGL135W	RPL1B	9.74006	0.106205	0.067	9.7376	0.024295	0.012	10.3945	0.00401235	NA	10.1759	0.153831	0.113	10.4682	0.0207982	0.015	10.4112	-0.0020686	NA	9.78031	0.0275871	0.009
YGL136C	MRM2	3.39915	-0.108469	NA	4.29924	0.0249486	NA	4.40738	-0.0736144	NA	4.6684	-0.155946	-0.041	4.34375	-0.010811	NA	4.54775	-0.00264088	NA	3.9007	-0.206741	NA
YGL137W	SEC27	8.08981	-0.230507	-0.095	8.15181	-0.104774	-0.004	8.90161	-0.0559484	NA	8.7308	-0.0950077	-0.006	8.74723	-0.0382134	NA	8.77469	0.0486173	NA	8.68511	-0.441131	-0.311
YGL139W	FLC3	5.25858	0.0219527	NA	5.38804	0.0759036	NA	5.49167	-0.013127	NA	5.32828	-0.089315	NA	5.54545	0.0580348	NA	5.23251	0.0247288	NA	5.0072	-0.0502901	NA
YGL141W	HUL5	7.03343	0.0356628	0.005	7.36676	0.0147597	0.003	NA	NA	NA	6.69913	0.0184009	0.003	6.59117	0.0197543	0.007	6.69303	0.00433502	NA	NA	NA	NA
YGL142C	GPI10	5.18525	0.357368	0.125	5.74424	0.315288	0.185	5.41707	0.0654866	NA	5.03792	0.318106	0.157	5.70605	0.367781	0.251	5.2956	0.115458	0.022	4.83753	0.287921	0.029
YGL143C	MRF1	4.27158	-0.113881	NA	4.53781	0.058417	NA	5.39037	-0.0613428	NA	5.17245	-0.192376	-0.059	4.84709	-0.0530337	NA	5.01955	-0.0118335	NA	4.28151	-0.19314	NA
YGL144C	ROG1	5.00096	0.217414	0.047	4.99132	0.344764	0.2	5.20082	0.0153157	NA	4.96325	0.169599	0.075	5.10214	0.112755	0.058	4.92764	0.0213071	NA	4.89399	0.102141	NA
YGL145W	TIP20	5.44198	0.225991	NA	6.17068	0.19461	0.073	6.09326	0.0189879	NA	6.01456	0.135599	0.017	6.10836	0.161583	0.069	5.99026	0.118203	0.013	5.57924	0.195099	NA
YGL146C	RRT6	1.09547	-0.232232	NA	2.42531	-0.424787	-0.074	3.08378	0.0191057	NA	3.16413	-0.401965	-0.161	1.77225	-0.0479357	NA	2.98284	-0.221924	-0.018	2.56994	0.0379704	NA
YGL147C	RPL9A	9.27818	0.109226	0.064	9.22154	0.0323206	0.017	9.63197	0.00180453	NA	9.64216	0.21188	0.153	9.58163	0.0609392	0.047	9.40878	0.00681657	0.001	8.89371	0.0263582	0.002
YGL148W	ARO2	7.7429	0.485196	0.34	7.71941	0.385287	0.281	8.72786	0.0066621	NA	8.34484	0.105636	0.068	8.34154	0.0384256	0.023	8.02306	0.0866122	0.049	7.72114	0.106302	0.035
YGL150C	INO80	4.80366	0.177055	NA	4.92573	0.272396	0.098	5.08906	0.0838422	NA	5.34392	0.222911	0.079	5.20061	0.316184	0.181	5.2697	0.226923	0.088	4.87115	0.249195	NA
YGL151W	NUT1	6.68627	0.11304	0.014	7.03373	0.0761736	0.03	6.78581	-0.00715132	NA	6.7522	0.133266	0.078	6.93079	0.0470913	0.017	6.85451	0.0415909	0.012	6.55784	0.0768049	NA
YGL154C	LYS5	3.00943	-0.116071	NA	3.61101	0.251633	NA	3.92326	0.0878149	NA	4.03467	0.0966188	NA	3.76249	0.123423	NA	3.95494	0.183375	0.013	3.35755	0.169147	NA
YGL155W	CDC43	2.45192	-0.192295	NA	3.42901	-0.246872	-0.009	4.66098	0.0203227	NA	4.86877	-0.195386	-0.055	4.23509	-0.0278789	NA	4.53227	-0.208224	-0.057	3.61621	-0.251093	NA
YGL157W	ARI1	8.1831	0.00922309	NA	8.45983	0.0155626	0.006	7.69668	0.00516001	NA	8.0321	0.00809507	NA	7.65905	0.0146606	0.005	8.16509	0.00289482	NA	7.56339	0.00538655	NA
YGL159W		4.42262	0.258336	NA	4.92163	0.151948	NA	5.35976	0.00561024	NA	5.38572	0.0627162	NA	4.91259	-0.0073331	NA	5.16167	0.100938	NA	4.5711	0.174263	NA
YGL160W	AIM14	5.84642	0.0294461	NA	5.91681	0.042638	0.003	5.4144	0.0170476	NA	5.36931	0.00890922	NA	5.54315	0.0997896	0.053	5.75333	0.0206738	NA	NA	NA	NA
YGL163C	RAD54	6.6152	0.193218	0.1	6.9584	0.171005	0.098	6.47874	-0.0220872	NA	6.4887	0.0970008	0.017	6.42767	0.160949	0.098	6.57018	0.103666	0.029	6.30284	0.122223	NA
YGL167C	PMR1	7.26533	0.0626956	0.005	7.65715	0.0238044	0.007	7.48735	0.000580906	NA	7.48693	0.0101269	NA	7.40991	0.0427538	0.026	7.5357	0.00144747	NA	NA	NA	NA
YGL171W	ROK1	4.79227	0.103152	NA	5.03468	0.152176	0.032	5.64549	0.0553007	NA	5.02927	0.262919	0.117	5.42543	0.177541	0.099	5.44008	0.175378	0.081	5.15102	0.156959	NA
YGL173C	XRN1	6.96787	-0.0807187	NA	7.2287	-0.0281553	NA	7.92705	0.00602893	NA	7.53505	0.211718	0.119	7.75275	0.0896748	0.042	7.70401	-0.0508904	-0.011	7.08473	0.0346215	NA
YGL174W	BUD13	4.73762	0.212067	0.048	5.02456	0.229434	0.112	4.9458	0.05186	NA	5.12952	0.118484	0.019	5.0191	0.083671	NA	5.09779	0.108685	NA	4.50738	0.151196	NA
YGL176C		5.36324	0.44075	0.239	5.76976	0.228569	0.137	5.2574	0.0382386	NA	5.39651	0.283048	0.171	5.29163	0.24024	0.155	5.45717	0.058669	0.015	5.20703	0.140076	0.013
YGL179C	TOS3	6.28467	0.254643	0.127	6.30485	0.0803619	0.028	6.11399	-0.00237679	NA	6.16288	-0.00190042	NA	5.87827	0.0762056	0.034	5.89113	0.0233362	NA	5.37079	-0.0191365	NA
YGL181W	GTS1	6.95539	0.0697504	0.02	7.08806	0.0703946	0.039	6.61032	0.00924596	NA	6.8466	0.0514251	0.026	6.75621	0.0488552	0.029	NA	NA	NA	NA	NA	NA
YGL185C		3.97042	0.627005	0.222	5.1748	0.22669	0.075	5.55271	0.0343428	NA	5.40115	0.334035	0.184	5.41385	0.208313	0.105	5.29323	0.257936	0.117	5.02953	0.110655	NA
YGL186C	TPN1	6.59741	0.197437	0.04	6.83397	0.0557319	NA	6.87972	0.0209841	NA	6.75358	0.359507	0.231	6.99651	0.26381	0.174	7.09626	0.181016	0.094	6.86991	0.0589337	NA
YGL189C	RPS26A	11.3224	0.0519503	0.034	11.0188	0.0643538	0.045	11.8637	0.00199582	NA	11.4496	0.0578765	0.041	11.6378	0.0374735	0.029	11.2317	0.00761188	0.004	11.2861	0.00476395	NA
YGL190C	CDC55	5.3015	-0.160621	NA	5.707	-0.260991	-0.119	5.58667	-0.0385015	NA	5.54252	-0.335157	-0.183	5.38299	-0.0796108	NA	5.6666	-0.0858177	NA	4.81255	-0.181219	NA
YGL191W	COX13	8.03305	0.0311156	NA	8.49418	0.0516614	NA	7.8849	-0.0417104	NA	7.98414	0.0836471	NA	8.08336	-0.00380666	NA	7.84874	0.176419	0.078	8.39832	-0.369693	-0.233
YGL194C	HOS2	4.70292	0.229834	NA	5.39035	0.115319	0.02	4.66778	0.0273405	NA	5.15418	-0.0283899	NA	4.63432	0.196259	0.096	5.02625	0.0389249	NA	4.82042	0.105327	NA
YGL194C-A		4.92537	0.0249399	NA	5.19248	-0.0181719	NA	5.52298	-0.0646697	NA	5.03448	-0.0970613	NA	5.09607	0.0394963	NA	5.04653	-0.00862792	NA	5.03591	-0.0556099	NA
YGL195W	GCN1	7.76403	0.0909893	0.04	7.78871	0.044315	0.022	7.83771	0.00149422	NA	7.84002	0.0680418	0.042	7.80718	0.0321527	0.02	NA	NA	NA	7.95406	0.0122881	NA
YGL196W	DSD1	6.48534	0.453391	0.283	6.46132	0.517992	0.392	6.59115	0.0307244	NA	6.37403	0.0362373	NA	6.70852	0.138855	0.085	6.72299	0.0644933	0.017	6.20978	0.0456994	NA
YGL197W	MDS3	2.54013	-0.564617	-0.144	4.15647	-0.215455	NA	4.52033	0.0490064	NA	4.44715	-0.210953	-0.042	4.12838	0.0524175	NA	4.16142	-0.0782283	NA	3.68219	0.0212454	NA
YGL198W	YIP4	6.21412	-0.0238001	NA	6.66688	-0.00744158	NA	7.14013	-0.0121867	NA	6.91296	0.0854223	0.015	6.93457	0.161274	0.098	6.94934	0.0368341	NA	6.8884	0.0163092	NA
YGL200C	EMP24	9.42038	0.189348	0.119	9.21414	0.116634	0.075	10.4734	0.0115188	0.001	10.2011	0.157396	0.112	10.4184	0.0495715	0.038	10.3612	0.0549836	0.042	9.86681	0.0272752	0.009
YGL201C	MCM6	4.96677	0.0738688	NA	5.78331	0.15956	0.034	5.63981	0.0377035	NA	5.57215	0.229227	0.089	5.53914	0.251895	0.138	5.51421	0.17545	0.054	4.9794	0.145228	NA
YGL202W	ARO8	8.16417	0.0252331	NA	7.79612	0.0724159	0.034	7.76705	0.00306643	NA	7.37344	0.177867	0.109	7.87195	0.0446564	0.024	7.94313	0.0238052	0.005	7.75545	0.00302817	NA
YGL203C	KEX1	5.98014	0.577448	0.35	6.4632	0.484407	0.35	6.58223	-0.00295397	NA	6.65409	0.275659	0.165	6.44916	0.390281	0.281	6.28917	0.166447	0.073	6.28647	0.15408	NA
YGL205W	POX1	0.481717	0.338488	NA	1.53099	0.0277996	NA	0.98912	-0.0149033	NA	1.46892	-0.089452	NA	0.448637	0.460973	0.018	0.760134	0.311639	NA	1.15109	0.36615	NA
YGL206C	CHC1	6.47351	0.00736253	NA	6.90323	-0.011867	NA	7.37721	-0.0116541	NA	7.44924	-0.0389338	-0.008	7.41973	-0.00731317	NA	7.28304	-0.0310513	NA	6.70565	-0.00655975	NA
YGL207W	SPT16	7.43373	0.553409	0.399	7.81976	0.414092	0.3	7.98093	0.0421861	NA	8.04472	0.403743	0.282	7.85535	0.225045	0.149	8.05939	0.194328	0.111	7.51384	0.140057	0.017
YGL209W	MIG2	6.13024	0.00633953	NA	7.1687	0.0236276	NA	6.66959	0.00676586	NA	6.96691	0.0207433	NA	6.54308	0.0723763	0.033	6.94789	-0.00893816	NA	5.83382	0.0849323	NA
YGL210W	YPT32	6.29969	0.272459	0.132	6.34886	0.30101	0.195	6.1617	0.0663925	NA	6.19698	0.310194	0.198	6.34393	0.294257	0.21	6.31124	0.106385	0.048	6.2303	0.0810529	NA
YGL213C	SKI8	4.92756	0.510614	0.264	5.50671	0.271393	0.112	5.67076	-0.00293758	NA	5.72618	0.162021	0.039	5.70925	0.290364	0.171	5.55854	0.0386629	NA	5.11752	0.27464	0.006
YGL219C	MDM34	7.22229	0.110576	0.053	7.29398	0.0934172	0.055	6.49875	0.00432009	NA	6.58082	0.0797942	0.038	6.65312	0.0494467	0.026	6.97928	0.00644263	NA	7.04271	0.0119664	NA
YGL223C	COG1	5.15097	0.0167133	NA	5.27764	0.0278639	NA	4.79456	0.0142372	NA	4.61416	-0.190506	-0.062	4.67143	0.0188182	NA	4.82641	-0.0372361	NA	5.04874	-0.00364609	NA
YGL225W	VRG4	8.72379	0.0950507	0.033	9.11941	0.0513594	0.024	9.90111	0.011901	NA	9.75195	0.173439	0.12	9.85874	0.0885814	0.066	9.51605	0.183762	0.14	9.35369	0.0773225	0.033
YGL226C-A	OST5	7.20311	-0.010708	NA	7.21004	-0.0121241	NA	8.07764	-0.00319038	NA	7.6474	0.0611523	0.021	7.92624	0.0234663	0.002	7.63517	0.0338859	0.005	7.3726	-0.00562356	NA
YGL227W	VID30	5.06674	-0.0976252	NA	5.44417	0.193216	0.077	5.36452	-0.0229804	NA	5.63722	-0.119483	NA	5.70127	0.091795	0.009	5.65871	-0.204855	-0.082	5.34378	0.203892	0.04
YGL229C	SAP4	3.81248	0.44143	0.18	4.02272	0.181704	NA	4.15398	0.118072	NA	4.06716	0.00848805	NA	4.25247	0.222614	0.076	3.79521	0.100566	NA	2.82718	0.352557	NA
YGL231C	EMC4	5.8119	0.247048	0.067	5.81883	0.258257	0.122	6.54563	0.0199465	NA	6.50189	0.267019	0.169	6.5449	0.186637	0.123	6.60787	0.189949	0.113	5.86891	0.130522	NA
YGL232W	TAN1	6.28616	0.121735	0.026	6.42019	0.0695771	0.026	6.35105	0.00865849	NA	6.43623	0.0218388	NA	6.33567	0.0422201	0.02	NA	NA	NA	6.63209	0.0127254	NA
YGL233W	SEC15	5.45934	0.445711	0.226	5.45437	0.389971	0.235	5.70359	0.034951	NA	5.3467	0.266921	0.134	5.61271	0.214228	0.129	5.42484	0.185279	0.081	5.11071	0.00359384	NA
YGL237C	HAP2	5.29172	0.678401	0.477	5.84359	0.469073	0.314	5.5018	0.153016	NA	5.50282	0.267555	0.113	5.60328	0.343581	0.21	5.59647	0.335639	0.179	5.14303	0.423203	0.15
YGL238W	CSE1	8.49252	0.303268	0.209	8.68349	0.189991	0.137	9.0961	0.0130117	NA	9.06517	0.131492	0.094	9.19309	0.0637626	0.049	8.96913	0.0687317	0.05	8.93156	0.0478201	0.019
YGL241W	KAP114	6.09893	0.0641459	0.012	6.07631	0.0523657	0.006	6.44957	0.00940913	NA	6.05454	0.00754412	NA	6.43924	0.0453984	0.014	6.54754	0.0256372	NA	6.17518	0.0492306	NA
YGL242C		5.9612	0.457525	0.268	5.87309	0.399347	0.255	5.7822	0.0418545	NA	6.09935	0.210081	0.088	5.65413	0.388481	0.255	5.80992	0.270042	0.138	5.5357	0.104025	NA
YGL245W	GUS1	7.74039	0.0583037	0.016	7.78978	0.0392618	0.016	7.85226	0.00604964	NA	7.96533	0.0420206	0.023	7.86838	0.0145694	0.006	7.88412	0.00313562	NA	8.16128	3.6899e-05	NA
YGL246C	RAI1	5.7894	0.0543136	NA	6.40671	0.0380522	NA	6.27488	0.0120961	NA	6.01941	-0.0293242	NA	6.12744	0.0838876	0.028	6.18664	0.0486041	NA	5.96019	-0.0218417	NA
YGL247W	BRR6	6.24364	-0.139367	NA	6.37907	-0.0543979	NA	6.28346	0.00324896	NA	5.6287	-0.172526	-0.058	6.39954	0.0264315	NA	5.93409	-0.022806	NA	5.41659	-0.151848	NA
YGL250W	RMR1	3.4479	0.409962	NA	4.48538	0.213218	0.012	4.84504	0.0381078	NA	4.68708	0.057226	NA	4.71355	0.035006	NA	4.85014	0.0924881	NA	4.13544	-0.0943224	NA
YGL251C	HFM1	3.65505	-0.190787	NA	4.36689	0.105489	NA	4.72307	-0.00759656	NA	4.64499	-0.167179	NA	4.47376	0.164308	0.031	4.47691	-0.0396234	NA	4.17454	0.0307533	NA
YGL252C	RTG2	5.95497	0.475074	0.271	6.08546	0.395972	0.266	6.14944	0.0291831	NA	6.15534	0.105931	0.045	6.19226	0.124404	0.075	6.16034	0.147185	0.077	5.79475	0.254729	0.079
YGL253W	HXK2	10.27	0.0265594	0.009	9.94694	0.016934	0.006	10.1956	0.00124347	NA	10.4672	0.0221806	0.013	10.3264	0.0092738	0.003	10.5815	0.0098687	0.004	10.0423	-0.00212678	NA
YGL256W	ADH4	5.56618	0.221732	0.074	5.50442	0.222852	0.11	5.23692	0.0702352	NA	5.29162	0.222207	0.105	5.28519	0.208891	0.112	5.55902	0.156085	0.052	5.49749	0.31246	0.175
YGL257C	MNT2	4.27754	0.0555553	NA	4.51039	0.115187	NA	4.98797	0.00479731	NA	4.92177	0.132747	0.024	5.01039	0.149441	0.062	4.932	-0.000970883	NA	4.62766	0.0854842	NA
YGR001C	AML1	7.16428	0.0289278	0.003	6.27348	0.0397978	0.009	5.94235	0.00692312	NA	NA	NA	NA	5.6401	0.0863302	0.041	5.12176	0.0360196	NA	5.12993	0.107233	NA
YGR002C	SWC4	5.78731	0.264151	0.118	5.95878	0.162496	0.085	5.53644	0.0187802	NA	5.39864	0.034799	NA	5.62319	0.159298	0.098	5.62752	0.0729979	0.025	5.25873	0.125842	NA
YGR003W	CUL3	5.37159	0.0417015	NA	5.55424	0.045117	0.017	5.57901	-0.0107132	NA	5.4116	-0.0690468	NA	5.49325	0.0159641	NA	5.5713	0.0240651	NA	5.21628	-0.0392327	NA
YGR004W	PEX31	5.153	0.257149	0.049	5.17154	0.273809	0.125	5.31079	0.0227698	NA	4.97552	0.261148	0.113	5.12844	0.220065	0.115	5.04034	0.0866345	NA	4.21009	0.102498	NA
YGR009C	SEC9	5.0738	0.0345278	NA	5.52444	0.0557329	NA	5.16876	0.0147299	NA	4.96743	-0.037609	NA	5.18996	0.0447949	NA	5.25249	0.0600686	NA	4.46261	0.0642735	NA
YGR011W		5.22988	-0.099447	NA	6.06233	-0.0157444	NA	6.27789	0.0267919	NA	6.3719	0.00959644	NA	5.88194	0.186282	0.085	6.20104	-0.078052	NA	5.63754	0.133445	NA
YGR012W		5.99379	0.315349	0.113	6.10915	0.282905	0.152	6.69889	0.0260287	NA	6.46639	0.229043	0.128	6.6538	0.289555	0.204	6.69047	0.0978705	0.039	6.22461	0.243864	0.071
YGR013W	SNU71	5.79481	0.478226	0.27	6.18828	0.32728	0.194	5.91803	-0.0396821	NA	6.1905	-0.0473366	NA	5.91931	0.139003	0.049	5.85183	0.0671498	NA	5.77603	0.0656498	NA
YGR019W	UGA1	5.92382	0.0819844	NA	6.0594	0.00670664	NA	5.30108	0.0238426	NA	5.6467	0.32209	0.196	5.53148	0.274066	0.173	5.89588	-0.0130876	NA	5.56776	0.178939	0.027
YGR020C	VMA7	9.02145	0.00453269	NA	8.85084	0.020526	0.007	9.1263	2.48389e-05	NA	8.90029	0.0369865	0.02	9.15288	0.011532	0.005	8.97538	0.00356959	NA	8.77191	0.00680228	NA
YGR026W		7.39758	0.326846	0.18	7.42704	0.196195	0.084	7.60509	-0.029125	NA	7.86837	0.0781544	NA	7.77655	0.12082	0.05	7.72997	0.0329071	NA	7.23375	0.140323	NA
YGR027C	RPS25A	10.1858	0.103409	0.05	9.66926	0.195601	0.127	10.5069	0.0272466	NA	10.1573	0.148151	0.09	10.4102	0.20545	0.154	10.389	-0.0251957	-0.001	10.6066	-0.0266551	NA
YGR027W-B		5.46121	0.0171909	NA	4.56614	0.0996323	NA	3.98108	0.107467	NA	4.25434	0.386616	0.205	4.17658	0.255965	0.125	4.14089	0.152951	0.027	5.3695	-0.0518347	NA
YGR029W	ERV1	5.22702	0.676526	0.451	5.51588	0.601968	0.447	5.75754	-0.0118131	NA	5.52318	0.380758	0.22	5.60365	0.286063	0.172	5.46897	0.341921	0.18	5.44296	0.521289	0.274
YGR030C	POP6	4.83972	0.0233791	NA	5.32158	0.0322722	NA	5.7964	-0.0120928	NA	5.3674	0.0212174	NA	5.39181	0.00889528	NA	5.58996	-0.0143523	NA	5.05658	0.0100687	NA
YGR032W	GSC2	6.27535	-0.0953476	NA	6.62576	-0.00245759	NA	6.79846	-0.0484524	NA	7.46773	-0.0997766	-0.032	7.12093	0.0653191	NA	6.86871	-0.0990971	-0.034	6.52768	0.0605919	NA
YGR033C	TIM21	6.35805	0.00165554	NA	6.56573	-0.00415315	NA	6.8989	-0.00550356	NA	6.60395	-0.0794597	-0.036	6.86443	-0.000891327	NA	6.56251	-0.0201113	NA	6.35023	-0.00590403	NA
YGR034W	RPL26B	8.83904	0.724608	0.617	8.70637	0.473644	0.38	9.32592	0.117164	0.051	9.37934	0.445705	0.35	9.29392	0.557722	0.466	9.26226	0.0735645	0.053	8.79367	0.265875	0.172
YGR036C	CAX4	1.96205	0.426802	0.011	3.52829	-0.179213	NA	3.33487	-0.0815479	NA	4.58181	-0.10839	NA	2.39714	0.102218	NA	3.6671	-0.00821328	NA	2.92061	-0.0432249	NA
YGR037C	ACB1	7.95885	0.212592	0.07	8.23979	0.0917628	0.024	8.97666	0.0164022	NA	8.19917	0.230418	0.135	8.43694	0.248847	0.177	8.77536	0.0251364	NA	7.99411	0.133725	0.021
YGR038C-B		3.32152	0.272811	NA	2.71781	0.211903	NA	1.82176	0.132272	NA	NA	NA	NA	2.46292	0.197583	NA	2.36242	-0.0614748	NA	2.74355	-0.0369407	NA
YGR038W	ORM1	6.02078	0.130591	0.035	6.25724	0.170315	0.088	6.6086	-0.011482	NA	6.45507	-3.59462e-05	NA	6.54415	0.0582306	0.013	6.5665	0.0239769	NA	6.11474	0.113983	NA
YGR039W		1.25168	0.42766	NA	2.15733	0.0689638	NA	3.85216	0.0573086	NA	2.19818	0.154148	NA	2.91875	0.0684724	NA	3.62026	0.0650143	NA	2.27792	0.334157	NA
YGR041W	BUD9	4.66847	0.312759	0.014	4.92666	0.0663202	NA	5.31156	0.00932805	NA	5.47297	0.0964456	0.01	4.80614	0.0407521	NA	5.24197	0.102481	0.017	4.60971	0.305703	0
YGR042W		6.48741	0.32848	0.185	6.43781	0.346803	0.233	5.89754	0.0148157	NA	6.28626	0.317164	0.196	6.04948	0.20385	0.104	6.02189	0.286927	0.16	6.26622	0.340514	0.189
YGR046W	TAM41	5.24073	0.00623486	NA	5.45093	-0.0231087	NA	4.62261	-0.00334929	NA	4.86193	-0.0344227	NA	4.88217	0.0166372	NA	5.09182	-0.0485711	NA	5.35361	0.017798	NA
YGR048W	UFD1	7.14819	0.268763	0.166	7.54203	0.197218	0.14	7.14493	0.0105748	NA	7.46154	0.0149757	0.004	7.11651	0.0278157	0.014	7.2632	0.0176227	0.005	7.55109	0.0205303	0.001
YGR049W	SCM4	6.06416	0.319317	0.122	6.26354	0.123287	NA	6.95487	0.0337644	NA	6.42126	0.129918	0.041	7.00212	0.240822	0.174	6.54018	0.13779	0.063	5.93625	0.342369	0.121
YGR050C		2.76233	0.0322075	NA	2.15328	0.113985	NA	3.84797	-0.0551125	NA	3.43256	0.124014	NA	3.25839	0.103192	NA	2.24819	0.134407	NA	3.16248	-0.114119	NA
YGR053C		3.57699	0.206939	NA	3.59879	0.273822	0.062	2.90422	0.106621	NA	3.03205	0.219128	NA	3.09419	0.197226	0.008	3.04714	0.0141851	NA	3.59731	0.303342	NA
YGR054W		8.0436	0.225334	0.128	8.37403	0.120445	0.072	8.40532	-0.00153305	NA	8.29881	-0.00444759	NA	8.47278	0.0426569	0.015	8.38828	0.0102295	NA	7.96602	0.080864	NA
YGR055W	MUP1	8.18039	0.0350067	0.007	8.6832	0.0276142	0.014	8.07139	0.00552975	NA	7.83914	0.0368824	0.015	8.0733	0.0967465	0.073	8.07749	0.00509767	NA	7.92462	0.0339389	NA
YGR060W	ERG25	11.9187	-0.0466206	-0.012	11.6484	-0.0136515	NA	11.3048	-0.0342564	NA	11.2349	-0.0488364	-0.009	11.3611	-0.0415583	-0.014	11.3317	-0.00602102	NA	11.9897	-0.129945	-0.091
YGR061C	ADE6	8.98681	0.191546	0.127	8.667	0.16996	0.116	8.7081	0.0112802	NA	8.87476	0.035085	0.016	8.66945	0.0306798	0.017	8.76023	0.0136083	NA	8.77008	0.0226916	NA
YGR062C	COX18	5.39555	0.165829	NA	5.74837	0.0293761	NA	5.03063	-0.00558865	NA	5.08215	0.218205	0.09	5.06736	0.0857448	NA	5.17213	0.00566596	NA	4.99441	0.0521438	NA
YGR063C	SPT4	5.26872	-0.0752988	NA	5.93745	0.161692	0.041	6.33774	-0.0234509	NA	5.87833	-0.029676	NA	5.77158	-0.0578845	NA	6.2626	-0.0822204	-0.019	5.74187	-0.05883	NA
YGR064W		1.35995	0.556709	0.173	2.34523	0.2332	NA	2.46357	-0.130854	NA	2.294	0.10278	NA	2.22427	0.0939364	NA	2.26035	0.222651	NA	1.9155	0.231885	NA
YGR074W	SMD1	5.91364	0.00337332	NA	6.34252	0.0221788	NA	6.36288	0.0288242	NA	5.99626	0.0265399	NA	6.49614	0.0181641	NA	6.36429	0.0269576	NA	6.0119	0.0186751	NA
YGR077C	PEX8	5.79833	0.00344346	NA	5.95663	0.0300257	NA	5.78383	-0.00598395	NA	5.57276	0.0365268	NA	5.75966	0.0994993	0.042	5.62628	0.113178	0.038	6.0892	-0.0251668	NA
YGR079W		7.27301	0.0876975	0.014	7.6896	0.022171	NA	7.55613	-0.00684608	NA	7.36777	0.0300914	NA	7.17009	0.0778781	0.046	7.30888	-0.017347	NA	7.72706	-0.00134854	NA
YGR081C	SLX9	4.42247	0.129537	NA	4.85673	-0.0161524	NA	5.64733	-0.00860386	NA	5.43638	0.143496	0.031	5.38804	0.0797958	NA	5.4629	0.107551	0.014	5.12933	0.1893	NA
YGR082W	TOM20	7.28006	0.238497	0.122	7.12755	0.167922	0.083	7.59112	-0.0376784	NA	7.73842	0.019109	NA	7.56382	0.0578739	0.008	7.52624	0.1216	0.069	7.59729	0.105824	0.034
YGR083C	GCD2	7.55423	0.128995	0.064	7.2401	0.075189	0.036	6.91266	-0.00287401	NA	6.92927	0.186359	0.118	6.91627	0.172012	0.123	7.13569	-0.0124242	NA	7.51149	0.000890648	NA
YGR086C	PIL1	10.7235	-0.0906691	NA	10.8126	0.0508028	NA	10.6643	-0.0570259	NA	10.7993	-0.0428707	NA	10.8367	0.0789111	0.02	10.6083	0.0468396	NA	10.9157	-0.501519	-0.387
YGR088W	CTT1	6.40506	0.131358	0.053	6.5076	0.111462	0.053	4.46359	0.0587161	NA	4.61487	0.553606	0.381	4.90973	0.266011	0.167	4.56809	0.113103	0.023	5.65712	0.00574358	NA
YGR089W	NNF2	6.16864	0.0324899	NA	6.3183	0.0119889	NA	5.21477	-0.000639127	NA	5.48684	0.0130985	NA	5.41501	0.0218826	NA	5.37946	-0.000790544	NA	NA	NA	NA
YGR091W	PRP31	4.67349	0.435186	0.16	5.45687	0.311537	0.154	5.5985	-0.00648699	NA	5.41434	0.0649593	NA	5.46323	0.148547	0.039	5.42699	0.17552	0.047	5.04177	0.163627	NA
YGR092W	DBF2	4.65337	0.524919	0.245	5.4926	0.493359	0.339	5.60201	0.160002	NA	5.78518	0.212128	0.088	5.8311	0.369315	0.247	5.81835	0.385106	0.234	5.04569	0.367323	0.11
YGR094W	VAS1	9.01692	0.0196001	0.006	8.76895	0.0133475	0.005	8.49246	0.00145846	NA	8.43702	0.0481467	0.03	8.48852	0.0298067	0.02	8.72593	6.78987e-05	NA	8.85332	-0.000212451	NA
YGR095C	RRP46	5.79738	0.551425	0.322	6.51819	0.266295	0.145	6.45172	0.0317252	NA	6.31412	0.121463	0.025	6.23967	0.129283	0.052	6.40779	0.166162	0.074	5.94395	0.378952	0.149
YGR097W	ASK10	6.52529	0.587606	0.415	6.91666	0.537996	0.415	6.86068	0.0681931	NA	6.36329	0.400016	0.256	6.77299	0.272601	0.18	6.96123	0.285223	0.179	6.57416	0.310607	0.127
YGR098C	ESP1	4.50459	-0.0273674	NA	4.93358	-0.0416422	NA	5.69419	-0.00824971	NA	5.13259	-0.0426929	NA	5.92846	0.149207	0.07	5.54345	-0.0963162	NA	5.256	0.0128829	NA
YGR101W	PCP1	7.44308	0.531977	0.397	7.84195	0.512702	0.401	6.93333	0.134026	NA	7.20642	0.386049	0.259	7.17533	0.43793	0.325	7.11144	0.236438	0.132	7.12158	0.134924	NA
YGR102C	GTF1	6.14294	0.0645545	NA	6.31155	0.018032	NA	6.17745	0.00942107	NA	6.25653	0.0370247	0.009	6.37927	0.0456242	0.023	6.20179	0.0109214	NA	NA	NA	NA
YGR103W	NOP7	5.56961	0.475111	0.249	5.65214	0.201137	0.092	5.94667	0.00175971	NA	5.97096	0.179476	0.096	5.94485	0.0853511	0.04	5.75907	-0.0234022	NA	5.48237	0.0323649	NA
YGR104C	SRB5	4.88809	0.419913	0.173	5.05798	0.495761	0.326	5.10451	-0.0803074	NA	5.18608	-0.075906	NA	5.10024	0.211959	0.087	5.02381	0.201381	0.055	4.89568	0.137776	NA
YGR105W	VMA21	6.60279	-0.0104195	NA	7.02313	0.0520974	NA	7.31563	0.0136072	NA	7.0017	-0.024833	NA	7.21387	0.0366795	NA	7.23848	0.0265726	NA	6.99058	-0.00811631	NA
YGR106C	VOA1	7.5401	0.220421	0.13	7.36914	0.165759	0.1	6.89634	0.00769653	NA	7.16341	0.0588457	0.02	6.93401	0.24855	0.181	7.32639	-0.0139394	NA	7.09214	0.0515651	NA
YGR108W	CLB1	6.45586	0.010108	NA	6.20264	0.0052409	NA	7.03648	0.00776404	NA	6.25004	-0.000513847	NA	7.29768	0.00922712	NA	7.03193	0.0102925	NA	6.33756	-0.000747867	NA
YGR109C	CLB6	3.67343	0.419211	0.073	3.92744	0.123251	NA	4.36571	-0.00859093	NA	5.02927	0.0995135	0.015	4.28001	0.296524	0.151	4.90761	0.099148	0.016	4.73017	0.168093	NA
YGR110W	CLD1	3.22273	0.847353	0.637	4.23201	0.644925	0.446	3.64681	0.129234	NA	3.49558	0.128617	NA	3.58358	0.366254	0.156	3.78553	0.207657	0.041	3.53321	0.0881143	NA
YGR111W		8.20155	0.0137183	NA	8.3054	0.00146344	NA	7.58903	0.00338666	NA	7.54412	0.00985257	NA	7.69182	0.0078845	0.001	7.66923	0.00118244	NA	7.70737	0.00831634	NA
YGR112W	SHY1	4.67026	-0.018884	NA	5.57541	0.0170416	NA	5.51128	0.0458601	NA	5.17896	-0.0383785	NA	5.48755	0.14674	0.045	5.57713	-0.199296	-0.081	5.23372	0.0697545	NA
YGR116W	SPT6	5.98967	0.285657	0.047	6.42721	0.342741	0.202	6.92177	0.105219	NA	7.11259	0.625471	0.512	7.06637	0.268716	0.18	6.75391	0.115589	0.035	6.0588	0.43557	0.195
YGR118W	RPS23A	10.7143	0.533314	0.431	10.6177	0.472579	0.38	10.8723	0.022191	NA	10.8937	0.445505	0.336	10.834	0.203804	0.159	10.7043	0.11681	0.087	10.545	0.190877	0.124
YGR119C	NUP57	6.8197	0.0805873	NA	7.08515	0.126758	0.023	7.03473	0.00919279	NA	7.00815	-0.101267	NA	7.02523	0.104938	0.034	7.12063	0.138796	0.055	6.51021	0.00895855	NA
YGR122C-A		1.78937	-0.264279	NA	2.07658	-0.378894	-0.014	2.18657	-0.130239	NA	2.19106	-0.0859446	NA	1.97218	-0.402723	-0.099	1.71952	-0.132503	NA	1.74233	-0.604957	-0.245
YGR122W		4.98343	0.0331688	NA	4.98635	0.0245926	NA	4.81714	0.00785674	NA	4.9997	-0.118243	-0.03	4.73513	0.0192322	NA	4.98034	-0.0318982	NA	4.05981	-0.0150648	NA
YGR124W	ASN2	8.25767	0.28868	0.168	8.4616	0.384799	0.285	8.49456	0.0758826	NA	8.84829	0.302104	0.202	8.41365	0.421278	0.33	8.51546	0.00178091	NA	8.49011	0.0930756	0.005
YGR125W		5.9554	0.0882787	NA	6.44884	0.0396419	NA	6.35747	0.0181822	NA	5.75488	0.201967	0.099	6.35887	0.04989	0.02	6.35662	0.0236501	NA	5.78727	0.108535	NA
YGR127W		5.51584	0.115411	0.03	5.67901	0.0961812	0.031	4.95896	-0.0203621	NA	5.60629	-0.093272	NA	4.91573	-0.00396245	NA	5.30019	0.0666329	NA	5.53617	0.124134	0.042
YGR128C	UTP8	7.28108	0.142816	0.027	7.60416	0.0528175	NA	8.22964	0.026132	NA	8.3774	0.144079	0.081	8.05669	0.239693	0.176	8.07583	0.209246	0.143	7.74502	0.157603	0.057
YGR129W	SYF2	2.58045	-0.384836	NA	4.13907	-0.0652224	NA	4.76083	0.00862123	NA	4.36751	-0.30609	-0.108	4.29925	-0.0900418	NA	4.37737	-0.0957496	NA	4.09333	-0.0861831	NA
YGR130C		7.86338	0.0751763	0.034	8.16517	0.0276799	0.014	7.38641	0.0162852	NA	7.39531	0.115766	0.073	7.61713	0.0438298	0.029	7.57732	0.0196369	0.007	7.32697	0.0109843	NA
YGR131W	FHN1	5.23433	0.0612018	NA	4.7517	0.169875	0.06	4.69814	-0.00975146	NA	4.3081	0.00229973	NA	4.42682	0.0497678	NA	3.9862	0.00812415	NA	4.27062	0.0139277	NA
YGR132C	PHB1	7.55042	0.151167	0.09	7.30639	0.0957064	0.042	7.00304	-0.00725981	NA	7.24893	0.0813993	0.026	7.29795	0.110662	0.07	7.26529	0.0784566	0.031	6.8198	0.119234	0.043
YGR133W	PEX4	3.15804	0.19135	NA	3.81136	0.171524	NA	4.56844	-0.0456398	NA	4.46643	0.116836	NA	4.77074	0.261519	0.123	4.31102	0.266544	0.082	4.04701	0.17656	NA
YGR137W		8.79044	0.0162091	0	8.90278	0.0028417	NA	NA	NA	NA	7.77128	0.0167424	0.002	8.50411	0.00678461	0.002	8.69522	0.00230902	NA	NA	NA	NA
YGR138C	TPO2	7.34808	0.174822	0.052	7.7061	0.232668	0.126	6.82028	-0.0231983	NA	6.46794	0.029465	NA	6.55077	0.152303	0.068	7.00264	0.090479	0.015	6.56062	0.107109	NA
YGR140W	CBF2	4.90431	0.0524496	NA	5.0165	0.0911574	NA	5.46469	0.00200132	NA	5.07333	0.0887338	NA	5.39967	0.0461619	NA	5.63475	0.0366692	NA	4.91333	0.0678386	NA
YGR141W	VPS62	3.72591	-0.107197	NA	3.94584	0.04899	NA	4.69802	0.0797188	NA	5.68128	0.267848	0.125	4.56445	0.143519	NA	4.79089	0.205768	0.049	4.47569	0.149731	NA
YGR142W	BTN2	8.89023	0.0244047	0.005	9.3634	0.0131856	0.005	8.43121	0.00430714	NA	8.24825	0.0189908	0.006	8.86535	0.0267836	0.018	8.89449	-4.28734e-05	NA	9.47562	-0.000198106	NA
YGR145W	ENP2	5.66379	0.146729	NA	5.1354	0.112637	NA	5.58618	-0.00260039	NA	5.74862	0.243382	0.128	5.60561	0.11757	0.041	5.15807	0.0135449	NA	5.65018	0.0502664	NA
YGR146C	ECL1	7.09065	0.311217	0.196	7.29772	0.200741	0.14	6.4685	0.0482843	0.005	7.19661	0.0413886	0.019	6.76415	0.140617	0.099	7.07988	0.0578022	0.03	6.91936	0.0531753	0.008
YGR146C-A		3.0462	0.132354	NA	3.30965	0.116711	NA	2.57516	0.00193187	NA	2.81843	0.0106471	NA	2.44106	0.108894	NA	NA	NA	NA	2.74191	0.0529009	NA
YGR147C	NAT2	5.71126	0.0961546	NA	6.14803	0.0714246	0.025	6.47396	0.0226564	NA	6.36602	0.108189	0.06	6.39699	0.114336	0.077	6.3304	0.0506617	0.022	5.809	0.101904	0.008
YGR148C	RPL24B	9.13455	0.145555	0.037	9.00773	0.104049	0.007	9.46613	-0.0476651	NA	9.48266	-0.00951047	NA	9.48828	0.0365321	NA	9.05018	-0.0141424	NA	8.64134	0.0645299	NA
YGR149W		4.22972	0.20201	NA	5.07537	0.12691	NA	4.94276	0.0244718	NA	5.19758	0.018952	NA	4.98689	0.131882	0.03	5.24217	0.169089	0.049	4.63385	0.0894741	NA
YGR150C	CCM1	6.1363	0.0778792	0.008	6.17801	0.0486359	0.013	NA	NA	NA	6.16459	0.0718848	0.033	6.16627	0.0223645	0.005	6.07781	0.0190331	NA	NA	NA	NA
YGR151C/YGR152C	RSR1	6.3343	0.228862	0.087	5.98436	0.146742	0.058	6.07323	-0.0125623	NA	6.48512	-0.0121085	NA	6.12501	0.0161263	NA	6.23099	0.0451531	NA	6.65468	0.048915	NA
YGR153W		2.73873	-0.0565971	NA	2.86077	0.263104	NA	4.19632	-0.0686979	NA	3.67879	0.291464	0.058	4.02714	0.136525	NA	4.13208	0.036617	NA	3.49966	0.225949	NA
YGR154C	GTO1	3.25552	0.0577161	NA	4.33887	0.0628646	NA	4.19408	-0.0901194	NA	4.09554	-0.130213	NA	3.96482	0.101842	NA	3.93665	0.0221186	NA	4.0201	-0.0610399	NA
YGR155W	CYS4	9.07507	0.0372912	0.008	9.5012	0.0525088	0.032	9.21437	0.0116836	NA	9.53262	0.0104925	NA	9.24131	0.00616583	NA	9.1906	0.0197216	NA	8.89616	0.0161789	NA
YGR156W	PTI1	3.54579	0.14373	NA	4.06772	0.351363	0.094	4.69486	-0.0758682	NA	4.96934	0.392696	0.213	4.42636	0.341595	0.168	4.56522	0.25493	0.081	4.65212	0.12065	NA
YGR157W	CHO2	7.47881	0.0348928	NA	7.96345	0.0527409	0.025	8.15109	0.00358108	NA	8.35881	0.0355025	0.018	8.17666	0.0404675	0.026	7.82914	0.0167683	0.002	7.53378	0.0380165	NA
YGR158C	MTR3	4.54327	-0.118619	NA	4.91596	-0.065644	NA	5.59244	-0.00311365	NA	5.72367	-0.108084	-0.042	5.22866	-0.0218843	NA	5.50182	-0.0336114	NA	5.14503	-0.126711	NA
YGR159C	NSR1	6.32598	0.237811	0.078	7.2086	-0.00786024	NA	7.27099	-0.00616836	NA	7.43697	0.00493056	NA	6.93292	0.0945687	0.059	7.29547	-0.00670856	NA	7.40584	0.00398028	NA
YGR161C	RTS3	6.45349	0.321486	0.176	6.34	0.305758	0.202	5.09603	0.0076926	NA	5.03632	0.127847	NA	5.3905	0.237546	0.14	5.8136	0.231673	0.109	6.25448	0.302676	0.164
YGR161W-C		4.84484	0.333961	0.068	4.85462	0.312268	0.164	5.71994	-0.102653	NA	5.28433	0.0864697	NA	5.40674	0.0904614	NA	5.72674	0.101721	NA	4.58624	0.215708	NA
YGR162W	TIF4631	2.74449	-0.453067	-0.066	3.49529	-0.392484	-0.124	3.77036	-0.155538	NA	4.31966	-0.329277	-0.133	3.0555	0.0843752	NA	3.53171	-0.331908	-0.072	2.87622	-0.368591	NA
YGR165W	MRPS35	5.79659	0.0940299	NA	6.09118	0.119542	0.036	5.74484	0.0102999	NA	5.84103	0.0312863	NA	5.88885	0.108714	0.046	5.78898	0.0299678	NA	5.55536	0.0238875	NA
YGR168C		5.14783	0.0299426	NA	5.21928	0.0977706	NA	5.82753	0.0115053	NA	5.56454	0.100386	0.031	5.80181	0.036401	NA	5.61524	0.0274671	NA	5.17705	0.0112457	NA
YGR170W	PSD2	5.24419	-0.346958	-0.114	5.43192	0.00766828	NA	5.53583	-0.12774	NA	5.3884	-0.0214788	NA	5.46356	-0.128038	-0.029	5.313	0.0531243	NA	5.13401	-0.191633	NA
YGR171C	MSM1	4.09328	0.198821	NA	4.57744	0.283337	0.105	4.27342	-0.0290741	NA	4.16714	0.177975	NA	4.44677	0.112559	NA	4.41546	-0.0593367	NA	3.78845	0.0870725	NA
YGR173W	RBG2	5.98136	0.441222	0.248	6.18661	-0.125784	NA	6.66424	0.0233879	NA	6.85923	0.139819	0.049	6.56686	0.271594	0.184	6.64053	0.0617155	NA	6.27088	0.106845	NA
YGR175C	ERG1	7.43494	0.040389	0.004	7.30409	0.00303771	NA	6.81537	-0.000483715	NA	7.03187	0.122726	0.075	6.88611	0.0783459	0.05	7.36581	-0.00187409	NA	7.44688	-0.00163635	NA
YGR177C	ATF2	4.94205	0.171778	NA	5.41126	0.0497989	NA	5.78955	-0.00680012	NA	5.21909	0.0562793	NA	5.56423	0.0688142	0.021	5.30742	-0.0187825	NA	5.25224	-0.0305699	NA
YGR178C	PBP1	8.23605	0.188195	0.088	8.40457	0.130142	0.051	8.21123	-0.0554074	NA	8.31135	-0.0290537	NA	8.23686	0.0363212	NA	8.10629	0.0557347	NA	8.0181	-0.00402244	NA
YGR179C	OKP1	6.06256	0.150657	NA	5.88039	0.0834497	NA	5.54793	0.0223547	NA	5.70208	0.040554	NA	5.70931	0.222854	0.114	5.51763	0.219082	0.082	6.00827	0.221193	0.051
YGR180C	RNR4	10.0801	0.0559474	0.038	9.77617	0.00735369	0.003	NA	NA	NA	NA	NA	NA	9.19281	0.00321247	0.001	NA	NA	NA	NA	NA	NA
YGR181W	TIM13	6.37031	0.266581	0.169	6.29892	0.186872	0.095	6.47927	0.0354179	NA	6.44388	0.183724	0.094	6.32974	0.0952237	0.028	6.62037	0.177273	0.098	6.6284	0.229484	0.119
YGR183C	QCR9	2.58078	-0.650676	-0.317	2.44544	-0.440079	-0.083	2.53522	-0.287687	NA	3.127	-0.0570874	NA	2.69857	-0.218923	NA	2.70431	-0.157898	NA	2.26774	-0.724923	-0.338
YGR185C	TYS1	8.34453	-0.00440671	NA	8.27825	0.0167523	0.001	8.71907	0.000434221	NA	8.59802	0.0444742	0.026	8.64753	0.0130419	0.005	8.51215	0.00963246	0.001	8.07032	0.00971477	NA
YGR186W	TFG1	5.27256	0.56772	0.344	5.02036	0.593738	0.422	5.02749	0.0398819	NA	5.01264	0.155552	0.037	5.09105	0.324641	0.201	5.14314	0.125945	0.031	4.99528	0.375689	0.122
YGR187C	HGH1	6.66825	0.247542	0.095	6.9215	0.183388	0.093	7.32855	0.0084212	NA	7.25609	0.0667945	0.015	7.01956	0.191215	0.126	6.95502	0.132123	0.068	7.39878	0.0684748	NA
YGR191W	HIP1	5.5538	0.214381	NA	5.87328	0.230039	0.078	6.46231	0.107305	NA	6.45919	0.0882872	NA	6.29008	-0.0552936	NA	6.33466	0.0529274	NA	6.06946	0.109499	NA
YGR192C	TDH3	13.9579	0.000404091	NA	13.9199	0.00147722	0	13.7118	-0.000427619	NA	13.8533	0.00174025	0	13.7454	0.00396435	0.003	14.0455	0.000457814	0	14.1783	0.000579801	NA
YGR193C	PDX1	6.20668	0.28775	0.152	6.12481	0.185313	0.097	6.05661	0.0383498	NA	6.18136	0.0459525	NA	6.23147	0.221651	0.148	6.19154	0.0166073	NA	5.67297	0.130999	NA
YGR194C	XKS1	5.28954	0.164898	NA	5.63469	0.145735	0.03	6.09465	0.0372454	NA	6.0705	0.0755865	NA	6.2273	0.20568	0.128	6.28026	0.137325	0.062	5.9785	0.0780134	NA
YGR195W	SKI6	6.07641	0.000817249	NA	6.54737	0.000455604	NA	6.95896	-0.00221449	NA	6.911	-0.00234969	NA	6.79056	0.00263936	NA	6.75263	-0.00206367	NA	6.38572	-0.00165109	NA
YGR196C	FYV8	4.09936	0.0216996	NA	4.50133	0.0888928	NA	3.944	-0.00535768	NA	4.47535	0.091711	0.011	4.16843	0.0704251	NA	4.17716	0.128894	0.023	3.7091	0.155596	NA
YGR198W	YPP1	5.53085	0.309605	0.113	6.06156	0.130455	0.055	5.67726	-0.00445179	NA	5.6896	0.104406	0.032	5.79346	0.116618	0.06	5.58339	-0.00560571	NA	5.07938	0.0910193	NA
YGR199W	PMT6	4.72923	0.471859	0.144	5.42364	0.281556	0.1	6.03891	0.102662	NA	5.92043	0.242943	0.098	6.01514	0.344993	0.219	6.06052	0.159245	0.05	5.66642	0.168712	NA
YGR200C	ELP2	5.85807	0.027332	NA	6.36152	0.0413902	NA	7.16871	-0.00745639	NA	6.85001	0.0839331	0.018	7.12778	0.0712782	0.028	6.95758	-0.0038692	NA	6.67992	0.118519	NA
YGR201C		7.5951	0.170547	0.099	7.78244	0.0308047	0.013	6.98604	0.00588905	NA	6.85372	0.0252979	0.001	7.19132	0.0476899	0.029	7.01601	0.0111374	NA	7.65105	0.00656715	NA
YGR204C-A	NA	NA	NA	NA	1.32717	0.0794422	NA	0.43812	-0.313372	NA	1.0219	-0.484122	-0.072	0.688944	-0.192459	NA	0.207919	-0.47017	NA	1.13101	-0.354499	NA
YGR204W	ADE3	9.35126	0.0076006	NA	9.52321	-0.000227979	NA	9.52996	-5.35032e-05	NA	9.85191	0.00273015	NA	9.56177	0.00568638	0.002	9.43372	0.000510547	NA	9.16451	-0.00129786	NA
YGR205W	TDA10	4.996	0.0695263	NA	5.30169	-0.041141	NA	5.32814	0.0509236	NA	5.80357	-0.19497	-0.07	5.76575	0.185861	0.086	5.63182	0.112663	NA	4.85523	-0.0402066	NA
YGR208W	SER2	8.1524	-0.0314046	-0.011	8.15687	-0.0256951	-0.009	7.68813	-0.00469069	NA	7.74276	-0.0190036	NA	7.61168	0.0469291	0.022	7.86338	-0.0244564	-0.007	7.50674	0.0146181	NA
YGR209C	TRX2	9.27243	0.00314584	NA	9.51584	0.000137145	NA	NA	NA	NA	9.00732	0.00308233	NA	9.06443	0.00101938	NA	9.00418	-3.96455e-05	NA	9.25266	0.0015306	NA
YGR210C		6.59832	0.148636	NA	6.84329	0.232246	0.123	7.63645	0.0467827	NA	7.23624	0.10022	0.033	7.498	0.281348	0.2	7.2214	0.172578	0.096	7.15115	0.1402	0.026
YGR211W	ZPR1	8.04518	0.00643621	NA	8.56615	0.0155011	0.006	8.21905	0.00210326	NA	8.10725	0.0269776	0.012	8.47279	0.032034	0.022	8.13634	0.00576444	NA	8.16265	0.0167249	NA
YGR214W	RPS0A	10.0281	0.317659	0.234	10.012	0.288994	0.219	10.9607	0.00979477	0	10.7084	0.200271	0.147	10.8771	0.08992	0.073	10.397	0.0602215	0.047	10.1806	0.0532183	0.027
YGR215W	RSM27	8.6111	-0.0147567	NA	8.18944	-0.000440098	NA	8.15734	-0.00166222	NA	8.02015	0.0340664	0.01	8.02073	0.0138496	NA	7.9455	0.0283347	0.007	8.44032	-0.0178606	-0.003
YGR216C	GPI1	4.12234	0.265873	0.06	4.83537	0.176307	0.068	5.29095	0.0547583	NA	5.05466	0.224515	0.088	5.24584	0.17728	0.083	5.1342	0.000224635	NA	4.82834	0.172733	0.015
YGR218W	CRM1	7.91161	0.00953469	NA	7.68536	0.00361256	NA	7.24542	0.00487802	NA	7.41481	-0.0226151	-0.001	7.3485	0.00802758	NA	7.30593	0.0082415	NA	7.21126	0.00857802	NA
YGR220C	MRPL9	6.80185	0.0293418	NA	7.06677	-0.00185114	NA	6.8631	0.001854	NA	6.56106	0.0907926	0.026	6.77938	0.0776791	0.035	6.92593	-0.00146146	NA	6.35154	0.0861413	NA
YGR222W	PET54	3.54833	0.167928	NA	4.17201	0.0767921	NA	3.99738	0.029795	NA	4.27027	0.0449977	NA	3.88762	0.220959	0.088	4.14507	0.174819	0.044	3.90758	0.0307296	NA
YGR227W	DIE2	4.28628	0.698091	0.494	4.9524	0.403291	0.214	5.00279	0.118122	NA	4.91463	0.26295	0.092	5.01154	0.159091	0.042	5.03955	0.134264	NA	4.71299	0.566405	0.308
YGR229C	SMI1	5.32809	0.629991	0.409	5.51131	0.624749	0.476	5.71171	0.063996	NA	5.78279	0.19919	0.099	5.73909	0.369387	0.263	5.97886	0.0801265	0.017	5.66332	0.131414	NA
YGR230W	BNS1	3.82034	0.191709	NA	3.27236	0.0514261	NA	4.77579	0.0427115	NA	4.09009	0.153448	NA	4.67743	0.0163575	NA	4.43701	0.10629	NA	3.51401	-0.00444393	NA
YGR231C	PHB2	8.35087	0.0555712	NA	8.56683	0.0546767	NA	7.78163	-0.0302613	NA	8.01298	-0.00364285	NA	7.88903	0.0303062	NA	8.0234	0.0456176	NA	7.99204	0.0226211	NA
YGR232W	NAS6	6.50878	0.226917	0.094	6.73966	0.184051	0.113	6.95752	0.0311053	0.004	7.13886	0.0856128	0.051	6.90255	0.0987433	0.067	6.75074	0.0234569	0.005	6.71389	0.00783535	NA
YGR234W	YHB1	10.2988	0.0175234	0.002	10.3255	0.012316	0.004	10.8341	-0.000235143	NA	9.46727	-0.0113726	NA	10.4993	0.0110591	0.006	10.7715	0.00881532	0.003	9.87138	0.00659237	NA
YGR235C	MIC26	5.33255	0.120973	NA	5.74651	0.0629142	NA	5.88474	-0.00535274	NA	5.5014	0.124747	0.035	5.90996	0.105386	0.052	5.93193	0.0339234	NA	5.46784	0.0438605	NA
YGR238C	KEL2	6.19531	0.0382403	NA	6.2293	0.0456831	NA	5.63718	0.0152917	NA	5.80169	-0.0442593	NA	5.8484	0.0290898	NA	5.87346	0.0392305	NA	5.56492	0.033046	NA
YGR239C	PEX21	5.52137	0.0118013	NA	5.67796	0.00699965	NA	5.10924	0.0112835	NA	5.34438	0.0795974	0.018	4.95013	0.0372422	NA	5.0997	0.0108866	NA	4.83986	0.116759	NA
YGR240C	PFK1	7.73885	0.24413	0.147	7.99274	0.281703	0.209	8.13119	0.046798	NA	8.11793	-0.0500897	NA	8.26285	0.0847471	0.03	8.21526	0.1574	0.094	7.78288	0.204628	0.098
YGR243W	MPC3	5.05106	0.136501	NA	5.09965	0.103464	NA	4.27195	-0.0397898	NA	4.41779	-0.0130601	NA	4.48969	0.161749	0.027	4.30334	-0.06092	NA	4.65856	-0.0622329	NA
YGR244C	LSC2	8.06384	0.30333	0.216	7.77401	0.356792	0.27	7.56672	0.0113162	NA	7.56001	0.109134	0.07	7.34963	0.269247	0.206	7.72526	0.0158185	0.005	7.54076	0.0211972	NA
YGR245C	SDA1	5.06714	0.0859462	NA	5.24823	0.0994466	NA	6.10623	0.0276711	NA	6.18146	0.0572918	NA	5.83795	0.263481	0.147	5.68813	0.117434	NA	5.79942	-0.06585	NA
YGR247W	CPD1	3.21459	0.352029	NA	3.36228	0.0668783	NA	3.54864	0.0259418	NA	3.93449	0.208693	0.046	3.67125	0.357865	0.173	3.68554	0.322925	0.107	3.36947	0.43688	0.073
YGR248W	SOL4	5.2759	0.0716007	NA	5.40487	0.132679	0.061	4.9197	0.0349632	NA	5.43156	0.0913308	0.037	5.22478	0.226401	0.151	5.32262	0.0549856	0.011	5.49867	0.077485	NA
YGR250C		4.3566	0.320248	0.029	5.29915	0.101025	NA	4.96153	0.019133	NA	4.67136	0.315338	0.143	5.11511	0.133117	0.051	5.23066	0.276203	0.147	4.71256	0.110418	NA
YGR251W	NOP19	2.7571	0.0917051	NA	3.67254	-0.0929375	NA	3.4582	-0.00698575	NA	4.48601	-0.00417404	NA	2.56094	-0.304569	NA	3.42016	-0.00619741	NA	3.32469	-0.183746	NA
YGR252W	GCN5	4.41787	-0.016544	NA	4.94884	-0.00652586	NA	5.03009	-0.00625284	NA	4.99338	-0.039405	NA	5.04647	-0.00693245	NA	5.08945	-0.0162623	NA	4.27945	-0.108149	NA
YGR253C	PUP2	7.92722	0.0534608	NA	8.37633	0.031218	0.008	8.36373	0.0110881	NA	8.01847	0.148848	0.096	8.25533	0.031952	0.015	8.54839	0.0516505	0.031	8.11921	0.0314783	NA
YGR254W	ENO1	11.362	0.147185	0.111	11.3505	0.134393	0.103	10.9147	0.0209201	0.003	10.9258	0.00775382	NA	11.2903	0.0673958	0.055	11.5576	0.0222296	0.011	11.4989	0.00599669	NA
YGR255C	COQ6	6.73106	0.289792	0.124	6.81588	0.344329	0.219	7.11094	0.067376	NA	6.74786	0.332214	0.201	6.8575	0.285348	0.189	7.1125	-0.0485275	NA	6.34403	0.102791	NA
YGR256W	GND2	5.45902	0.0682546	NA	5.71704	0.440461	0.313	4.50288	0.129357	NA	4.78479	0.190205	0.07	5.39926	0.171486	0.099	5.53507	0.0585494	NA	5.82907	0.0638176	NA
YGR257C	MTM1	6.78519	0.00472332	NA	7.02511	0.00821637	NA	7.25375	0.00580843	NA	7.05193	0.0077185	NA	7.06903	0.0152016	0.003	7.12722	0.00509876	NA	6.9611	0.00103302	NA
YGR260W	TNA1	6.88674	0.103998	0.04	6.77163	0.0214872	NA	6.43616	0.008714	NA	6.51507	0.462503	0.346	6.83332	0.078074	0.052	NA	NA	NA	6.85639	0.0204476	NA
YGR261C	APL6	7.17292	0.427768	0.274	7.02008	0.552174	0.43	7.38714	0.055521	0.005	7.54098	0.0986555	0.056	7.45061	0.124096	0.086	7.4112	0.243744	0.171	7.38173	0.297885	0.177
YGR262C	BUD32	6.26197	0.160637	0.055	6.17543	0.178751	0.092	6.19456	0.0249681	NA	6.19182	0.244462	0.153	6.26433	0.107606	0.066	6.01283	0.049098	0.009	5.79726	0.0733988	NA
YGR264C	MES1	6.37249	0.184131	0.021	6.65339	0.172786	0.065	7.0747	0.0577258	NA	7.14339	0.101506	NA	7.03227	0.203421	0.125	6.91314	0.160812	0.075	6.52356	0.229125	0.076
YGR266W		5.05883	0.0729327	NA	5.36424	0.0440612	NA	5.44528	-0.0186137	NA	5.77721	-0.00780091	NA	5.53857	0.0261743	NA	5.87349	0.0443183	NA	5.16779	0.0282934	NA
YGR267C	FOL2	7.04953	0.00665235	NA	7.39377	-0.0107432	NA	7.66485	-0.00571265	NA	7.15729	0.168812	0.086	7.54885	0.0572051	0.02	7.5826	0.0220695	NA	7.28337	0.0139614	NA
YGR268C	HUA1	3.61042	0.160949	NA	4.9548	-0.0331696	NA	4.86477	0.011088	NA	5.01337	-0.0744141	NA	4.38129	0.0908049	NA	4.87812	-0.017706	NA	4.07073	0.00435506	NA
YGR270W	YTA7	5.93398	0.0801343	NA	6.13538	0.0265261	NA	6.08116	0.00321541	NA	6.28827	0.0258481	0.004	6.1201	0.0330454	0.011	5.98567	0.0164175	NA	NA	NA	NA
YGR271C-A	EFG1	4.67342	0.639057	0.362	5.05486	0.354675	0.199	5.25249	0.0410466	NA	5.13069	0.294587	0.166	5.10772	0.277882	0.176	5.27901	0.104815	0.037	5.12589	0.0574719	NA
YGR275W	RTT102	5.89359	0.155884	0.031	5.98168	0.0985151	0.03	6.37759	0.0245127	NA	6.44854	0.112726	0.062	6.29399	0.106062	0.066	6.42334	0.106004	0.06	5.99074	0.0120061	NA
YGR278W	CWC22	7.75938	-0.00991325	NA	7.38278	0.0299518	NA	7.39503	0.000268517	NA	7.41411	0.0370428	0.011	7.36746	0.021147	0.003	7.36768	0.0192454	NA	8.23554	-0.013157	NA
YGR279C	SCW4	8.8557	-0.0327298	NA	8.22244	-0.0724249	-0.017	8.6699	-0.0209375	NA	8.78726	0.0964542	0.026	8.82791	0.129254	0.077	8.8506	-0.0339335	NA	8.87128	-0.342889	-0.231
YGR280C	PXR1	5.38716	-0.0228012	NA	5.73077	0.0451397	NA	6.36052	0.0138741	NA	6.35222	0.0101066	NA	6.21808	0.110031	0.04	6.25423	0.0491361	NA	5.95678	-0.0578246	NA
YGR281W	YOR1	6.10629	0.0550807	NA	7.03146	-0.035061	NA	6.92341	0.0148029	NA	6.77312	-0.209015	-0.111	6.92169	0.0280874	NA	6.67872	-0.0687996	-0.008	6.42612	0.045378	NA
YGR282C	BGL2	9.39186	0.297377	0.202	9.19244	0.28919	0.205	9.49988	0.0743304	NA	9.51922	0.36801	0.276	9.6933	0.288036	0.225	9.73928	0.202794	0.141	8.99391	0.256324	0.141
YGR283C		4.52382	0.40167	0.126	5.19607	0.175418	0.073	5.31658	0.00461791	NA	5.19409	0.0488466	NA	5.11302	0.094121	0.04	5.10401	0.0425364	NA	5.285	0.0326755	NA
YGR284C	ERV29	8.48398	-0.00615858	NA	8.69417	0.00143425	NA	9.04003	0.00699512	NA	8.88719	-0.0165825	-0.003	8.89052	0.00336551	NA	9.03303	0.000386352	NA	8.42273	-0.00561012	NA
YGR285C	ZUO1	9.26984	0.00415599	NA	8.97699	0.00488039	NA	9.66558	-0.00456639	NA	9.65154	0.0155921	0.004	9.71352	0.0191176	0.011	9.52953	0.00207148	NA	9.6237	-0.00336632	NA
YGR292W	MAL12	2.45067	0.0256747	NA	2.56622	0.0666021	NA	2.83281	0.0309943	NA	3.17444	0.208442	NA	3.6101	0.169318	0.034	3.83947	0.0538838	NA	2.52878	0.118045	NA
YGR295C	COS6	5.55378	0.33713	0.154	5.88268	0.146227	0.068	5.53756	0.0696167	NA	5.55679	0.199795	0.103	5.70186	0.293615	0.204	5.53546	0.0541381	NA	4.99071	0.207986	0
YHL001W	RPL14B	8.47849	0.115754	0.048	8.77804	0.0645287	0.032	9.33251	0.0042984	NA	9.29143	0.171802	0.121	9.22676	0.125446	0.096	9.01415	0.0248367	0.006	8.64523	0.00342345	NA
YHL003C	LAG1	6.68849	-0.0207027	NA	6.91774	0.046335	NA	6.83918	-0.00913205	NA	6.82429	-0.015771	NA	6.96562	0.0462332	NA	6.75619	-0.00294405	NA	6.6806	0.026575	NA
YHL006C	SHU1	4.49012	0.00949311	NA	4.89622	0.0121677	NA	5.53937	0.0223904	NA	5.21352	-0.199259	-0.092	5.16825	0.0142989	NA	4.83467	0.0253318	NA	4.70422	0.0119011	NA
YHL008C		4.74199	0.135689	NA	5.13096	0.201187	0.087	4.60987	0.0544377	NA	5.58977	0.139499	0.062	4.77893	0.177753	0.087	4.24223	0.247181	0.092	5.51388	-0.00817965	NA
YHL010C	ETP1	4.51022	0.00929451	NA	5.06279	0.00606434	NA	4.70125	0.0771394	NA	4.95331	-0.0113567	NA	4.69819	0.182701	0.057	4.87972	0.106832	NA	4.93582	-0.142443	NA
YHL011C	PRS3	6.11812	-0.179566	NA	6.83141	0.262889	0.129	7.67573	0.0590026	NA	6.88124	0.105573	NA	7.22761	0.174185	0.098	7.26087	0.247178	0.148	6.91404	0.171961	NA
YHL014C	YLF2	4.59884	0.0912422	NA	4.80491	0.0398685	NA	4.50819	-0.00945839	NA	4.69459	0.13643	0.024	4.59937	0.104146	0.017	4.68464	0.0416088	NA	4.12073	0.0686164	NA
YHL015W	RPS20	9.18955	0.0181499	NA	8.88177	0.0109134	0	9.47104	-0.000158049	NA	9.13058	0.022848	0.011	9.39875	0.0141649	0.008	9.12736	0.00165853	NA	8.94697	0.0229764	0.002
YHL017W		5.54864	0.216308	NA	6.47351	0.103528	NA	6.26459	-0.00249471	NA	6.65054	0.184472	0.069	6.12646	0.0877124	NA	6.25737	0.00995206	NA	5.89498	-0.0307715	NA
YHL021C	AIM17	6.57791	0.600281	0.449	6.81531	0.554059	0.442	5.73887	0.137848	NA	5.71677	0.266422	0.139	6.37887	0.295482	0.206	6.12378	0.0860503	0.012	5.76697	0.0779945	NA
YHL023C	NPR3	4.9028	0.103406	NA	5.39239	0.150117	NA	5.40859	0.0887891	NA	5.41548	0.211748	0.069	5.51949	0.238284	0.121	5.41736	0.131376	0.004	5.29649	0.0305541	NA
YHL024W	RIM4	6.48702	0.279589	0.181	6.76316	0.253188	0.173	5.82314	-0.00955243	NA	5.90211	0.0186141	NA	6.3997	0.220862	0.145	6.30259	0.0722587	NA	6.68384	0.247231	0.136
YHL027W	RIM101	5.39574	-0.0174747	NA	6.0446	0.0570059	NA	5.65394	-0.0163776	NA	5.92324	-0.0536859	NA	5.74453	0.0243484	NA	5.72821	0.0550861	NA	5.55973	-0.0162258	NA
YHL029C	OCA5	5.95768	0.128734	NA	6.4737	0.0461836	NA	5.9089	-0.0513376	NA	5.77931	-0.00141287	NA	5.89239	0.165391	0.083	5.95361	-0.0176171	NA	5.585	0.112765	NA
YHL030W	ECM29	7.15432	0.376032	0.243	7.55124	0.198861	0.135	7.13665	0.00660351	NA	7.43166	0.0398621	0.018	7.01739	0.110292	0.075	7.24286	0.0164213	0.002	7.26456	0.0561927	0.011
YHL032C	GUT1	4.65989	0.233167	NA	4.72554	0.0737107	NA	5.17094	-0.0339213	NA	5.60918	-0.0606272	-0.011	4.94144	0.14901	0.058	4.98069	0.0484809	NA	5.55738	-0.0486131	NA
YHL033C	RPL8A	8.50528	-0.122632	NA	8.9411	-0.0996126	NA	10.3277	0.0074546	NA	9.34853	-0.0933363	NA	9.8936	-0.0396499	NA	9.20755	-0.181238	-0.103	8.54909	-0.217324	-0.071
YHL034C	SBP1	8.49939	0.291108	0.211	8.33843	0.316533	0.242	7.75302	0.0127027	NA	8.21865	0.0288385	0.011	7.89146	0.125655	0.095	8.34629	-0.0155516	-0.007	8.40735	-0.00158872	NA
YHL035C	VMR1	5.59094	0.225107	0.044	5.86481	0.317224	0.188	5.77414	0.0777232	NA	6.09208	0.236409	0.118	5.77803	0.242882	0.142	5.75278	0.120077	0.02	5.56204	0.128381	NA
YHL037C		2.10505	-0.170689	NA	2.11154	-0.0520821	NA	2.16075	0.0109992	NA	3.03059	0.112856	NA	2.28825	0.198621	NA	1.31903	0.156702	NA	1.8443	-0.0240585	NA
YHL038C	CBP2	3.73793	0.444796	0.099	4.75961	0.520185	0.353	4.76924	0.10396	0.002	4.59624	0.548182	0.372	4.61991	0.367177	0.236	4.90812	0.253471	0.141	4.66836	0.314622	0.092
YHL042W		2.67597	-0.235502	NA	3.48079	0.0500028	NA	3.69986	0.029873	NA	3.34848	0.0104209	NA	3.43574	0.000977739	NA	3.47261	0.0368075	NA	2.9733	0.107744	NA
YHL044W		3.96674	-0.034095	NA	4.15224	0.0231701	NA	4.53235	-0.0635603	NA	4.78507	-0.00358465	NA	4.78771	0.0353784	NA	4.19174	-0.0824174	NA	3.77894	-0.065439	NA
YHL047C	ARN2	4.50489	0.146515	NA	4.60717	-0.0389104	NA	4.20284	-0.00233165	NA	4.41598	0.12129	NA	3.87036	0.0899162	NA	3.9907	0.0732122	NA	4.06387	0.218007	NA
YHL048W	COS8	5.90848	0.113177	NA	5.80663	0.224778	0.093	6.43075	0.00437893	NA	6.57347	0.23034	0.129	6.14	0.251919	0.159	6.36504	0.0495949	NA	5.36355	0.149952	NA
YHL050C		4.21602	0.227225	0.03	3.8497	0.115715	NA	3.57534	0.0145895	NA	4.04203	-0.00351159	NA	3.74914	0.114456	0.021	NA	NA	NA	NA	NA	NA
YHR001W	OSH7	5.19263	0.499892	0.28	5.66424	0.520555	0.359	5.76405	0.11339	NA	6.19475	0.269772	0.146	5.90668	0.34979	0.232	5.88572	0.135153	0.031	5.3127	0.21527	NA
YHR001W-A	QCR10	5.77983	-0.0204051	NA	6.43629	-0.0172663	NA	6.93544	-0.00361429	NA	6.33624	-0.0393073	NA	6.88667	0.00900048	NA	6.54696	-0.0262435	NA	6.14178	-0.0157522	NA
YHR003C	TCD1	4.83168	0.129528	NA	5.32109	0.256738	0.128	5.54033	0.0889605	NA	5.13104	0.17687	0.005	5.41875	0.217768	0.105	5.64304	0.0730815	NA	5.04213	0.237266	0.044
YHR005C	GPA1	6.07736	0.0248886	NA	6.5405	0.0538429	0.014	6.25614	0.00422281	NA	6.43339	0.085052	0.04	6.01369	0.100729	0.055	6.29538	0.0531516	0.018	6.22163	0.00674783	NA
YHR005C-A	TIM10	7.23369	0.0810565	NA	7.26029	0.0867352	0.024	7.38934	0.0210884	NA	7.05793	0.0582511	NA	7.45834	0.195266	0.134	7.81674	-0.00990259	NA	7.35628	-0.00598086	NA
YHR006W	STP2	6.3154	0.0275558	NA	6.92748	0.0442363	0.017	6.10136	0.00321478	NA	6.05171	0.0968994	0.043	6.16948	0.0659604	0.035	6.42465	0.0173284	NA	6.0966	0.0224891	NA
YHR011W	DIA4	4.10295	0.582912	0.279	4.7133	0.355124	0.168	4.83762	0.0956218	NA	4.73903	0.292931	0.123	4.79058	0.369009	0.209	4.88557	0.33666	0.152	4.31925	0.10975	NA
YHR012W	VPS29	6.66971	0.0531888	NA	7.23907	0.0643556	0.015	7.37474	0.0311418	NA	7.64702	-0.100548	-0.034	7.47025	0.0837034	0.049	7.24609	-0.00478351	NA	7.24593	0.0779871	0.013
YHR013C	ARD1	5.78661	0.150454	NA	5.98628	0.281544	0.112	7.31143	0.0123426	NA	7.54409	0.109262	0.058	7.23407	0.0967277	0.058	7.35053	0.0602925	0.024	6.62045	0.176614	0.045
YHR015W	MIP6	3.84709	-0.0947868	NA	4.28914	-0.00820421	NA	4.11754	-0.00351521	NA	4.09187	-0.220937	-0.059	4.37091	0.0452854	NA	4.23475	0.056353	NA	3.60207	0.155619	NA
YHR016C	YSC84	6.89504	0.489896	0.305	7.0434	0.451434	0.333	7.57337	0.0358729	NA	7.48727	0.395499	0.289	7.49387	0.225441	0.164	7.50829	0.126465	0.074	7.38085	0.105255	0.02
YHR018C	ARG4	7.20515	0.00449838	NA	7.26147	0.0102925	NA	6.44894	0.00884537	NA	6.55099	0.0318708	0.011	6.55297	0.0138071	0.003	6.99893	0.00258943	NA	NA	NA	NA
YHR021C	RPS27B	10.5406	0.028857	0.017	10.3707	0.00863213	0.004	10.3811	0.00275512	NA	10.6514	0.0116562	0.007	10.6453	0.0239495	0.018	10.5295	0.00535539	0.002	10.4268	0.00638321	0
YHR023W	MYO1	4.65259	0.0552021	NA	4.5315	-0.00484436	NA	5.76159	-0.0124109	NA	5.27869	0.308931	0.142	5.78393	0.0944817	0.004	5.5331	0.125203	0.011	4.84806	0.0726016	NA
YHR024C	MAS2	5.82208	0.160671	0.063	6.36639	0.180569	0.108	5.45935	-0.05983	NA	5.79223	0.0312354	NA	5.51628	0.0322324	NA	5.70401	0.0919385	0.013	5.729	0.100428	NA
YHR027C	RPN1	8.90744	0.0325198	0.016	8.70769	0.0116483	0.004	7.84491	0.00303991	NA	8.18191	0.00221675	NA	7.91395	0.0652663	0.047	8.59027	0.00135184	NA	8.94085	0.00396516	NA
YHR028C	DAP2	6.96266	0.0499265	NA	7.24574	0.0481901	0.019	6.90295	0.0132592	NA	6.99184	0.0374644	0.013	7.14131	0.0880205	0.059	7.11918	0.01056	NA	7.21538	0.0135696	NA
YHR029C	YHI9	5.07753	0.285788	0.114	4.91318	0.0817327	0.014	4.7017	0.0766503	NA	3.79109	0.0764827	NA	4.24919	0.314361	0.173	4.9228	0.0689971	0.015	5.17729	0.0437267	NA
YHR030C	SLT2	7.087	0.481237	0.314	7.53041	0.259451	0.155	7.33478	0.0769901	NA	7.24675	0.357426	0.239	7.39063	0.271434	0.192	7.61682	0.268973	0.178	7.29715	0.235005	0.107
YHR031C	RRM3	4.22986	0.123167	NA	4.38622	0.208694	NA	5.3736	0.05195	NA	5.09135	-0.107344	NA	5.33264	0.227906	0.111	5.18361	-0.020679	NA	4.4417	0.271885	NA
YHR033W		6.89158	-0.233124	-0.093	6.86704	-0.121233	-0.015	7.57713	-0.0608048	NA	7.29117	0.0375008	NA	7.8255	0.034034	NA	6.96812	0.0161157	NA	7.52141	-0.237311	-0.111
YHR034C	PIH1	4.26731	0.153134	NA	4.91181	0.141849	NA	4.91651	-0.0071733	NA	4.82793	0.159597	0.028	4.77181	0.0875495	NA	4.71157	0.0767725	NA	4.55592	0.161427	NA
YHR037W	PUT2	7.11467	0.0298529	NA	6.88652	0.0215427	NA	5.70182	0.00719655	NA	5.83145	-0.000351912	NA	5.96141	0.00489744	NA	6.4859	0.0509779	NA	6.73442	0.00705404	NA
YHR039C	MSC7	6.53477	0.0552887	NA	6.70094	0.113221	0.014	6.77706	0.0546631	NA	6.65368	0.160976	0.061	6.78499	0.143901	0.07	6.69954	-0.112411	-0.045	6.26497	0.0948005	NA
YHR039C-A	VMA10	7.19287	0.578483	0.44	7.20288	0.453637	0.348	7.08606	0.0261339	NA	7.2581	0.255107	0.176	7.14942	0.221141	0.165	6.95209	0.00946714	NA	6.73023	0.0481997	NA
YHR041C	SRB2	5.35718	0.397294	0.137	5.25962	0.114379	NA	6.04146	0.0229419	NA	5.72795	-0.0262999	NA	5.54612	0.0474466	NA	5.47612	-0.108107	-0.045	6.18468	-0.020626	NA
YHR042W	NCP1	8.67994	-0.0450611	NA	8.59206	-0.0193157	NA	9.25769	-0.0420885	NA	9.12949	-0.0274621	NA	9.19708	0.0248587	NA	9.0131	0.0191821	NA	9.5691	-0.0823958	-0.043
YHR044C	DOG1	6.15755	0.00942602	NA	6.56825	0.0118661	NA	7.34569	-0.000584461	NA	6.72726	0.00440653	NA	6.95744	0.00884923	NA	7.30229	0.0107839	NA	6.36613	0.00607601	NA
YHR045W		3.75237	0.0777852	NA	3.79688	-0.111108	NA	4.64011	-0.0288842	NA	4.4865	-0.112119	NA	4.26887	0.0697697	NA	4.47123	0.0280758	NA	4.1396	0.00179329	NA
YHR046C	INM1	5.25058	-0.0717496	NA	5.16627	0.0342003	NA	5.33625	0.0644178	NA	5.24719	-0.0169835	NA	4.98761	0.268663	0.145	5.44608	0.0139291	NA	4.89919	0.00808017	NA
YHR047C	AAP1	6.88799	0.406265	0.244	7.25685	0.190034	0.119	7.62788	0.0299172	NA	7.4596	0.272255	0.191	7.5028	0.160557	0.118	7.51417	0.0673821	0.036	7.10272	0.0912977	0.015
YHR048W	YHK8	1.11809	-0.471922	-0.031	1.83111	-0.0331062	NA	2.10596	-0.0725491	NA	1.93757	-0.554355	-0.198	1.72069	0.0537145	NA	1.60918	-0.0677699	NA	1.85692	0.0749536	NA
YHR049W	FSH1	7.95249	0.332535	0.201	8.42864	0.209123	0.144	8.88589	0.0483548	0.012	8.50141	0.0996708	0.064	8.77639	0.192411	0.15	8.95128	0.0668574	0.046	8.45459	0.137396	0.069
YHR051W	COX6	5.03738	0.212663	NA	5.59836	0.233959	0.086	5.8582	0.0768297	NA	5.73859	0.347493	0.202	5.71134	0.149781	0.051	5.92341	0.247284	0.121	5.10657	0.157882	NA
YHR052W	CIC1	6.81525	0.477426	0.338	6.6618	0.314227	0.213	6.10111	0.00585887	NA	5.99479	0.1753	0.087	6.06384	0.236995	0.159	6.46898	-0.012275	NA	6.52223	0.00838688	NA
YHR053C	CUP1-1	7.84933	-0.0386927	NA	8.22887	-0.0103905	NA	8.28135	-0.0113704	NA	7.11251	-0.036268	NA	8.46162	-0.00347565	NA	8.32322	0.0109782	0	8.27303	-0.00528028	NA
YHR055C	CUP1-2	7.82301	-0.0301741	NA	8.21753	-0.0129061	NA	8.28711	-0.0136057	NA	7.11208	-0.0776886	-0.021	8.45294	-0.00662149	NA	8.36	0.00806835	NA	8.25247	-0.0103296	NA
YHR057C	CPR2	6.93658	0.183593	0.064	7.14632	0.138191	0.069	7.65123	0.025087	NA	7.85961	0.109347	0.061	7.5715	0.101522	0.064	7.44173	0.105992	0.059	7.48801	0.0333853	NA
YHR059W	FYV4	5.18879	0.201323	0.051	5.00063	0.0425358	NA	4.64515	-0.00113675	NA	4.71541	0.00574476	NA	4.63271	0.0307579	NA	5.2674	-0.00480778	NA	5.45334	0.0130831	NA
YHR062C	RPP1	6.30886	0.224769	0.038	6.27447	0.246892	0.109	6.78685	0.0374258	NA	6.7413	0.146437	0.047	6.54705	0.299272	0.188	6.33493	0.302381	0.17	6.36366	0.155637	NA
YHR064C	SSZ1	8.84051	0.161214	0.101	8.52345	0.165163	0.114	9.0405	0.00655981	NA	8.9784	0.0973602	0.067	9.01566	0.0385224	0.027	8.89099	0.0251828	0.013	8.73942	0.0151591	NA
YHR065C	RRP3	5.61984	0.407053	0.241	5.64295	0.340547	0.232	5.25816	0.0107019	NA	5.15941	0.0407814	NA	4.91782	0.300537	0.197	NA	NA	NA	NA	NA	NA
YHR066W	SSF1	6.6884	0.00773574	NA	6.78927	0.0163431	NA	7.35551	0.00896779	NA	7.26915	-0.0279901	NA	7.19726	0.0283305	0.01	7.02349	0.0191809	NA	6.72468	0.0110099	NA
YHR068W	DYS1	8.09133	0.0497117	NA	7.93777	0.0885865	0.022	8.52499	-0.00137145	NA	8.5856	0.174614	0.097	8.46979	0.110516	0.062	8.32241	0.0644078	0.02	8.90271	-0.0716268	-0.024
YHR069C	RRP4	5.74821	0.287164	0.103	6.11807	0.240345	0.135	6.06942	0.0201046	NA	5.93171	0.162353	0.075	5.81364	0.131121	0.067	5.9718	0.10076	0.037	5.85201	0.0752701	NA
YHR070W	TRM5	3.05323	0.335075	NA	3.87269	-0.13445	NA	4.55885	0.0313704	NA	4.99824	-0.133661	NA	3.89463	0.0470963	NA	4.26213	0.0118758	NA	3.79321	0.0650256	NA
YHR071W	PCL5	5.16551	0.373281	0.169	5.36015	0.118256	0.035	5.17446	0.0369276	NA	5.8586	-0.0173366	NA	5.17816	0.0140312	NA	5.20161	0.0251217	NA	4.8192	0.12285	NA
YHR072W	ERG7	7.34985	0.0226876	NA	7.60955	0.000995316	NA	7.73124	-0.00230118	NA	7.53927	0.0312035	0.012	7.83422	0.00982799	0.001	7.53469	0.010882	NA	7.20512	0.00880593	NA
YHR072W-A	NOP10	8.67711	0.118869	0.074	8.50285	0.00934245	NA	8.27768	-0.000167018	NA	7.96317	0.0196364	0.002	8.17051	0.0207244	0.009	8.52762	0.000329717	NA	8.8875	-0.000818619	NA
YHR073W	OSH3	6.43094	0.0199706	NA	6.64421	-0.011873	NA	6.28947	0.0175587	NA	6.10464	0.0176544	NA	6.30339	0.033172	0.01	6.44349	0.00911921	NA	6.18554	0.022166	NA
YHR074W	NA	NA	NA	NA	5.71615	0.0220478	NA	5.64293	0.0110658	NA	5.55093	0.0859767	0.028	5.8326	0.0729317	0.038	5.86782	0.0520907	0.017	NA	NA	NA
YHR077C	NMD2	4.46638	0.154231	NA	5.46988	0.0376975	NA	6.05464	0.114142	NA	5.71553	0.0827002	NA	6.17387	0.193443	0.101	5.77199	-0.0316471	NA	5.68073	0.134995	NA
YHR078W		6.80788	0.000142363	NA	7.1942	0.0401357	0.005	8.07463	-0.00313522	NA	7.03702	0.0524189	0.014	7.94878	0.00527599	NA	7.41566	0.0367307	0.012	7.34503	0.00726837	NA
YHR079C	IRE1	5.65941	0.0413597	NA	6.03795	0.0272444	NA	6.22614	0.0143631	NA	6.10072	-0.0459738	NA	6.27264	0.0380555	0.008	6.17365	0.0173968	NA	5.91239	0.00927077	NA
YHR080C		4.12619	0.435381	0.126	4.23892	0.29387	0.108	4.18904	0.0794829	NA	4.47138	0.230247	0.085	4.26572	0.442148	0.265	3.99534	0.208856	0.05	4.51533	0.150614	NA
YHR081W	LRP1	5.63862	0.220532	0.011	5.77321	0.361268	0.213	5.75948	0.00605771	NA	5.9857	0.0992054	NA	5.68403	0.247952	0.137	5.71391	0.20295	0.083	5.82796	0.360398	0.154
YHR082C	KSP1	6.71197	0.605122	0.441	6.89734	0.611365	0.493	6.72461	0.049896	NA	6.77461	0.298517	0.181	6.83141	0.292575	0.2	6.72442	0.219642	0.125	6.09019	0.235566	0.038
YHR083W	SAM35	6.92588	0.248016	0.097	7.25251	0.326557	0.222	7.90426	0.0518861	NA	7.84926	0.263082	0.183	7.8698	0.260372	0.198	7.64229	0.100897	0.058	7.34383	0.157948	0.053
YHR085W	IPI1	5.16849	0.095302	NA	5.54261	0.111581	0.002	5.59511	0.02904	NA	5.76243	0.00648675	NA	5.46316	0.14328	0.059	5.5993	0.0153692	NA	5.23758	0.239756	0.042
YHR086W	NAM8	3.16527	0.253738	NA	4.05016	0.340813	0.094	4.63237	-0.142725	NA	4.73581	-0.0174751	NA	4.23368	-0.0233301	NA	4.76548	-0.0560037	NA	3.50378	-0.315639	NA
YHR087W	RTC3	7.8206	0.0496072	0.019	8.08787	0.00786926	0.001	NA	NA	NA	7.28426	0.0090709	NA	7.3838	0.0166922	0.007	7.77668	0.00152479	NA	NA	NA	NA
YHR088W	RPF1	6.40981	0.321052	0.147	6.13064	0.337649	0.203	6.06965	-0.0559301	NA	6.16337	0.289888	0.157	5.98253	0.248527	0.144	6.06168	0.219813	0.104	6.08955	0.302232	0.114
YHR089C	GAR1	9.18969	-0.0933859	-0.024	9.22632	-0.0801262	-0.014	9.29805	-0.0557896	NA	9.37024	-0.0936438	-0.028	9.13771	-0.0640899	-0.018	9.06698	0.0138134	NA	9.82583	-0.189402	-0.113
YHR092C	HXT4	6.74613	0.29121	0.135	6.2823	0.275521	0.139	6.47699	0.0300781	NA	6.33125	0.109092	NA	6.61734	0.296401	0.193	7.14606	0.147921	0.059	5.66001	0.274896	0.04
YHR094C	HXT1	6.47904	0.0841955	NA	6.49293	0.131401	0.052	7.34005	-0.00330153	NA	7.01927	0.249486	0.168	6.66036	0.244635	0.171	7.10012	0.0392114	0.011	5.57246	0.175577	NA
YHR096C	HXT5	5.45185	0.380657	0.173	6.0092	0.334764	0.186	3.91979	0.229926	NA	4.14256	0.00488698	NA	4.16285	0.234587	0.089	4.12153	0.178719	0.017	4.56482	0.230432	0.014
YHR099W	TRA1	5.8386	0.102793	NA	6.24978	0.146678	0.064	6.86016	-0.00214113	NA	6.36803	0.0325346	NA	6.72214	0.0448386	0.022	6.30486	-0.000558766	NA	6.06295	0.029932	NA
YHR100C	GEP4	3.8201	0.05751	NA	4.1702	-0.0926221	NA	5.03608	0.0747472	NA	5.15779	0.00314517	NA	4.91408	0.124205	NA	4.65928	-0.189828	-0.053	4.36373	-0.00742154	NA
YHR106W	TRR2	6.33746	0.359752	0.168	6.48598	0.299507	0.173	6.38991	-0.0490283	NA	6.40342	0.330527	0.197	6.43459	0.143909	0.063	6.22556	0.34825	0.213	6.05177	0.0847953	NA
YHR108W	GGA2	8.13539	-0.0107009	NA	8.31872	0.0102892	NA	8.7888	-0.00974335	NA	8.69474	0.00427056	NA	9.08059	0.00850858	0.001	8.84132	-0.00117985	NA	8.54451	0.0132519	0.001
YHR112C		6.29065	-0.0214192	NA	6.48848	0.0158667	NA	6.87908	-0.0390859	NA	6.04695	0.230735	0.098	6.60829	0.0531771	NA	7.05979	-0.00130659	NA	6.47983	0.0150068	NA
YHR113W	APE4	6.58464	0.338763	0.177	6.80913	0.297436	0.19	6.60354	0.0876581	NA	6.84783	0.122105	0.05	6.8257	0.254875	0.176	6.78933	0.157774	0.085	6.41643	0.215759	0.061
YHR114W	BZZ1	5.59256	0.106956	NA	6.00037	0.0428	NA	5.89509	0.0129326	NA	5.94492	0.0163463	NA	5.90894	0.0222771	NA	6.00548	0.0125472	NA	6.09223	-0.00242111	NA
YHR117W	TOM71	5.86832	0.0589463	NA	5.91819	0.173655	0.067	6.30225	0.012682	NA	6.16683	0.197257	0.101	6.23991	0.0547044	NA	6.37009	0.0455005	NA	5.71773	0.107951	NA
YHR118C	ORC6	4.35785	0.00712345	NA	5.47519	-0.0289979	NA	5.35579	-0.014231	NA	5.50193	0.0311726	NA	5.26114	-0.0102753	NA	5.56691	-0.00769472	NA	4.77751	-0.0177992	NA
YHR120W	NA	NA	NA	NA	4.82036	0.132303	0.03	5.10493	0.0041351	NA	4.77244	0.0343632	NA	4.91949	0.0536238	0.01	4.80239	0.0412399	NA	NA	NA	NA
YHR121W	LSM12	7.24108	0.0237808	NA	7.4784	0.0126672	NA	7.50849	0.000168587	NA	6.88895	0.0286389	0.007	7.3855	0.0125537	0.004	7.06642	0.00409558	NA	NA	NA	NA
YHR122W	CIA2	3.63856	0.372137	NA	4.44081	0.138143	NA	4.52264	0.0937739	NA	4.85534	-0.00933074	NA	4.73306	0.272716	0.138	4.94286	0.227859	0.088	4.20133	0.156106	NA
YHR128W	FUR1	6.22271	-0.136081	NA	6.23937	0.0240031	NA	7.3713	-0.0661342	NA	7.18958	-0.359617	-0.232	6.85413	-0.0704511	NA	6.75299	-0.071132	NA	6.59226	-0.329117	-0.125
YHR129C	ARP1	4.16762	-0.0116283	NA	5.07466	0.0527007	0.004	5.37975	0.00571173	NA	5.27516	-0.0673258	NA	5.17823	0.0291771	NA	5.14384	-0.00298855	NA	4.81659	-0.083382	NA
YHR132C	ECM14	6.48505	0.237858	0.096	6.33577	0.189092	0.091	6.30556	0.0196558	NA	6.68405	0.0342523	NA	6.45335	0.150182	0.087	6.59214	0.0331738	NA	6.46162	0.0138546	NA
YHR132W-A	IGO2	4.62356	0.57892	0.269	4.88624	0.476132	0.286	5.23023	0.0174605	NA	5.31965	0.300428	0.168	5.26473	0.327119	0.212	5.2178	0.225544	0.109	4.58661	0.320756	0.038
YHR133C	NSG1	7.00085	0.0350956	NA	6.96547	0.0258363	NA	6.82335	0.00424812	NA	7.08302	-0.029536	NA	6.68455	0.0319161	0.01	6.93159	0.0178586	NA	6.88011	0.0405759	0.007
YHR135C	YCK1	5.79727	0.132058	NA	6.20257	0.0404218	NA	6.30795	0.0192848	NA	5.81696	0.177979	0.088	6.23868	0.113237	0.07	6.33852	0.0349993	0.006	5.4731	0.160776	NA
YHR136C	SPL2	3.89529	0.171098	NA	4.80946	0.0825571	0.012	2.8672	0.011084	NA	2.87369	0.017814	NA	2.20183	0.110825	NA	3.74576	-0.00319394	NA	2.45372	0.220495	NA
YHR137W	ARO9	6.62604	0.1619	0.032	6.25944	0.174424	0.065	5.77151	0.00410231	NA	6.03315	0.0965654	NA	6.94155	0.160599	0.1	6.58954	0.026803	NA	5.99972	0.0125479	NA
YHR140W		4.20755	0.299673	0.075	3.93827	0.33697	0.123	4.10038	-0.0127083	NA	3.26125	0.282787	0.038	4.07813	0.188536	0.07	4.45928	0.107638	0.02	3.11611	0.141666	NA
YHR141C	RPL42B	8.25513	0.339549	0.234	8.29547	0.11576	0.073	8.68785	0.00363149	NA	8.40653	0.296139	0.215	8.53856	0.112491	0.087	8.33953	0.0261049	0.013	8.04542	0.0777232	0.027
YHR142W	CHS7	7.6124	0.144658	0.069	7.46345	0.113914	0.067	7.7886	0.0137483	NA	7.54791	0.0576167	0.03	7.71404	0.0890268	0.063	7.81996	0.021734	0.007	7.44209	0.011942	NA
YHR143W	DSE2	5.28506	0.176113	0.087	5.52791	0.12948	0.042	5.79854	0.0702703	NA	5.91458	-0.353343	-0.207	5.82326	0.0748714	0.004	5.93998	0.0621932	NA	4.93682	0.0834792	NA
YHR143W-A	RPC10	6.55656	0.282247	0.116	6.63212	0.162668	0.069	6.79779	0.0865466	NA	6.90438	0.0882687	0.023	6.91929	0.17076	0.107	7.0879	0.0673305	0.014	7.06879	0.0350326	NA
YHR144C	DCD1	4.75526	0.46278	0.212	4.66688	0.498766	0.315	4.60535	0.0100604	NA	4.76787	0.0553329	NA	4.46153	0.347007	0.187	4.48702	0.344893	0.155	4.50865	0.54609	0.27
YHR146W	CRP1	8.50913	0.0484545	0.013	8.38619	0.0159928	NA	8.0076	0.0161639	NA	8.17224	0.0138149	NA	8.30004	0.0515086	0.03	7.95699	0.0477226	0.022	7.69589	-0.0583464	NA
YHR147C	MRPL6	5.53883	0.319864	0.128	5.98767	0.244013	0.143	5.87176	0.0241839	NA	5.50532	0.373011	0.218	5.74632	0.0680901	0.001	5.89433	0.0425136	NA	5.83596	0.127509	0.002
YHR150W	PEX28	4.36192	0.193934	NA	4.59929	0.332749	0.15	4.51954	0.0339604	NA	4.78283	0.0296699	NA	4.5241	0.195614	0.07	4.19536	0.049823	NA	3.91496	0.206455	NA
YHR151C	MTC6	3.44011	0.290216	NA	4.10287	0.277294	0.105	3.80009	0.128347	NA	3.86172	0.00144445	NA	4.04657	0.39459	0.234	3.83056	0.0183624	NA	2.65041	0.404465	NA
YHR153C	SPO16	2.04933	-0.53537	-0.115	3.46691	0.122622	NA	3.6277	0.0132529	NA	3.86631	0.0935413	NA	3.43276	0.086055	NA	3.69538	0.0994114	NA	3.33274	0.276046	NA
YHR155W	YSP1	4.85226	0.457504	0.207	5.25019	0.370035	0.227	4.84762	0.0366909	NA	5.14172	0.154652	0.058	5.08413	0.194037	0.105	4.79139	0.0784736	NA	4.72484	0.525774	0.246
YHR157W	NA	NA	NA	NA	1.6988	0.370276	0.023	NA	NA	NA	1.38199	0.262521	NA	1.2815	0.447992	0.118	NA	NA	NA	NA	NA	NA
YHR159W	TDA11	4.59443	-0.0586883	NA	5.00734	0.143103	NA	4.99809	-0.0601936	NA	5.22261	0.0412056	NA	4.56494	-0.0859446	NA	5.15336	0.0867737	NA	4.46387	-0.0536564	NA
YHR160C	PEX18	2.36657	0.00623179	NA	1.72162	0.0741568	NA	2.40589	0.105267	NA	2.55908	-0.27457	-0.027	2.80734	0.291553	0.061	2.46974	-0.00995388	NA	1.6202	0.397998	0.008
YHR163W	SOL3	6.65963	0.0510684	NA	6.78467	0.0714856	NA	7.52956	0.0353305	NA	6.97882	0.0757488	NA	7.56488	0.086506	0.04	7.47271	0.0371955	NA	6.81566	-0.0318021	NA
YHR164C	DNA2	5.70663	0.192923	NA	6.3073	0.214043	0.108	6.43388	0.0203	NA	6.25277	0.135447	0.051	6.42198	0.208612	0.134	6.15146	0.00560452	NA	5.70779	0.201179	NA
YHR165C	PRP8	5.89356	0.229762	0.083	6.03407	0.134873	0.064	6.40188	0.00563676	NA	6.53532	0.0188864	0.001	6.36322	0.0390627	0.019	6.1505	0.0168474	NA	6.08638	0.0246493	NA
YHR167W	THP2	4.89014	-0.0632147	NA	5.32692	0.0161685	NA	5.21064	-0.0409744	NA	5.04929	-0.0870274	-0.018	5.22536	0.0758726	NA	5.23174	-0.0429532	NA	5.18108	0.0549506	NA
YHR169W	DBP8	5.07571	0.337841	0.066	5.27679	0.183221	0.032	6.18346	-0.0369208	NA	5.9698	0.0317552	NA	5.855	0.222568	0.126	5.82234	0.0948079	0.006	5.70344	0.0913132	NA
YHR171W	ATG7	3.06063	0.477617	0.032	4.07912	0.0667078	NA	4.01428	-0.0256852	NA	4.09694	0.0289463	NA	4.01852	0.131387	0.016	4.10461	-0.0394622	NA	3.43768	0.123057	NA
YHR175W-A		4.26406	-0.0598616	NA	3.44392	-0.0661889	NA	1.69431	0.0168115	NA	4.93519	0.092501	NA	2.59857	-0.00823931	NA	1.99685	0.0929468	NA	2.5165	0.0241942	NA
YHR176W	FMO1	4.56878	-0.135876	NA	4.81314	0.0823493	NA	4.61943	-0.0676825	NA	5.72059	0.0294889	NA	4.48957	0.0315866	NA	4.46815	0.10507	NA	4.49085	-0.0115818	NA
YHR178W	STB5	4.32562	-0.0886861	NA	4.46489	-0.12074	NA	4.50322	0.0429348	NA	4.49085	0.0235161	NA	4.70893	0.191043	0.06	4.38819	-0.00796975	NA	4.33322	-0.0644212	NA
YHR180W		2.53846	0.263747	NA	2.99397	-0.072921	NA	2.88368	-0.111887	NA	2.60115	-0.0115751	NA	2.65962	0.08316	NA	2.62139	-0.184478	NA	2.89408	-0.293496	-0.01
YHR181W	SVP26	5.8092	0.293575	0.095	6.15701	0.283166	0.152	5.82193	0.0375385	NA	5.87596	0.251024	0.117	5.77895	0.271633	0.16	5.8702	0.227448	0.101	5.96462	-0.0725474	NA
YHR182W		5.81353	0.052606	NA	6.33536	0.0869052	0.016	7.35212	0.0135777	NA	6.69055	0.0565421	0.016	7.14245	0.0511213	0.026	6.72079	0.0266937	NA	6.44856	0.0405738	NA
YHR183W	GND1	9.39281	0.0103426	NA	8.98043	0.0901154	0.054	9.05784	0.00981851	NA	8.6919	0.0818523	0.046	9.12861	0.0655322	0.045	9.26301	-0.0167988	-0.006	8.78885	0.00175843	NA
YHR185C	PFS1	1.91323	0.264763	NA	1.55201	0.261703	0.022	2.13307	0.0928104	NA	1.82518	0.200803	NA	2.70415	0.169941	NA	1.85439	0.0117961	NA	1.58918	0.0653847	NA
YHR187W	IKI1	4.6949	0.218428	NA	5.04184	0.1002	NA	5.54549	-0.000944557	NA	5.04222	0.117354	0.025	5.66678	0.0841795	0.039	5.57418	0.059014	0.009	5.23697	0.0647485	NA
YHR191C	CTF8	4.45188	-0.0914255	NA	5.14714	0.158214	NA	6.40253	-0.00590057	NA	5.53167	0.126765	NA	6.14385	-0.0355962	NA	5.83728	0.158415	0.047	5.64648	0.0416884	NA
YHR192W	LNP1	5.92895	0.215254	0.03	5.76871	0.177635	0.05	6.74487	0.0263103	NA	6.82919	0.053894	NA	6.51498	0.147967	0.086	6.3745	0.174107	0.091	6.04817	0.0937711	NA
YHR193C	EGD2	9.33191	0.134429	0.087	9.2355	0.0201465	0.011	NA	NA	NA	9.26776	0.00185719	NA	9.139	0.0109875	0.006	9.38128	0.00157668	NA	NA	NA	NA
YHR195W	NVJ1	4.43903	-0.0200463	NA	4.80847	-0.063402	NA	4.46526	0.0222957	NA	4.8516	-0.464432	-0.292	4.5847	0.0712935	0.027	5.04226	-0.0435785	NA	4.81269	0.0737004	0.012
YHR196W	UTP9	5.26571	0.449537	0.195	5.61481	0.342921	0.193	5.81275	0.0181906	NA	5.43799	0.0135488	NA	5.58616	0.191195	0.098	5.78433	-0.00266366	NA	5.16225	0.120087	NA
YHR197W	RIX1	6.19503	0.0145598	NA	6.42164	0.0163904	NA	6.81887	0.00304094	NA	6.26824	0.0519699	0.006	6.66184	0.0416763	0.016	6.51718	0.0106899	NA	6.20261	0.00332462	NA
YHR200W	RPN10	7.69071	0.0421503	NA	8.24845	0.0510453	0.026	8.47781	0.0114872	NA	8.17207	0.0662701	0.039	8.37033	0.0710955	0.051	8.28189	0.0482277	0.029	8.44321	0.0198958	NA
YHR201C	PPX1	6.04188	0.0164674	NA	6.73294	-0.032725	-0.014	7.40973	-0.00887394	NA	7.21709	-0.0201868	NA	7.48266	0.00464289	NA	7.41418	0.0173798	NA	7.03774	-0.00755733	NA
YHR202W		4.11271	0.334756	0.095	3.72162	0.0481131	NA	3.73402	0.0590514	NA	3.86162	-0.0273955	NA	3.58854	0.149249	NA	3.95928	0.150028	NA	3.6155	0.281172	NA
YHR203C	RPS4B	9.0201	0.0652255	0.025	8.8132	0.0560074	0.03	8.70189	-0.00316496	NA	8.76163	0.0264946	NA	8.70654	0.0838083	0.058	8.95343	0.0385907	0.015	8.69712	0.0254781	NA
YHR204W	MNL1	5.19026	0.0287592	NA	5.77417	0.0206547	NA	5.88972	0.000647254	NA	6.06244	0.037535	0.005	5.57618	0.0765891	0.031	5.74791	0.0276958	NA	5.54158	0.00867149	NA
YHR205W	SCH9	5.26907	0.00514966	NA	5.49201	0.0682766	NA	5.19219	-0.0461555	NA	5.10181	0.0668901	NA	5.22044	0.198786	0.088	5.27686	0.0968568	NA	5.17203	0.0990768	NA
YHR207C	SET5	4.03111	0.134684	NA	4.07839	0.0123768	NA	4.54545	0.00679962	NA	4.53004	0.0684471	NA	4.69873	0.0920099	0.032	5.08973	0.0349631	NA	NA	NA	NA
YHR209W	CRG1	6.21605	0.289145	0.144	6.24707	0.285752	0.181	5.84524	0.0743168	NA	5.76883	0.0799388	0.004	6.16896	0.181036	0.114	6.3467	0.153228	0.084	5.95208	0.100975	NA
YHR210C		3.15145	0.31293	NA	3.96296	0.0455104	NA	3.91961	0.0516045	NA	3.56967	-0.0907727	NA	3.62914	0.0908801	NA	4.099	-0.042571	NA	3.28682	0.0844477	NA
YHR216W	IMD2	6.02823	0.551384	0.403	5.93624	0.444051	0.324	5.71927	0.130169	NA	6.00077	0.260505	0.14	6.1552	0.33764	0.237	5.99959	0.221227	0.114	5.50916	0.186811	0.009
YIL001W		3.65895	0.714699	0.431	3.58423	0.3941	0.117	4.0704	0.0144475	NA	3.52317	-0.0209369	NA	3.68005	0.0740582	NA	3.92109	0.034152	NA	3.1279	0.126527	NA
YIL002C	INP51	5.39213	0.560183	0.359	5.5914	0.513625	0.368	5.76233	0.0871288	NA	5.78568	0.153817	0.032	5.66866	0.350166	0.222	5.63645	0.200971	0.078	5.09115	0.194314	NA
YIL002W-A		5.30359	0.0637901	NA	5.17098	-0.00124899	NA	5.85747	-0.007591	NA	5.48701	0.00696539	NA	5.56754	0.17857	0.077	5.50107	0.0244349	NA	5.3037	0.0733692	NA
YIL003W	CFD1	4.64922	0.235682	0.025	5.22255	0.119016	0.036	5.05887	0.0180809	NA	5.50332	0.0717441	0.023	5.07569	0.0939672	0.037	5.12056	0.0387294	NA	4.69877	0.0795217	NA
YIL004C	BET1	5.49275	-0.0497219	NA	5.8879	0.151019	0.034	6.20782	-0.0209245	NA	5.92681	0.0484622	NA	6.18556	0.0861545	0.006	6.10778	0.113919	0.018	5.92699	0.0998177	NA
YIL005W	EPS1	5.93694	0.212046	0.109	6.37187	0.137552	0.053	6.27898	0.0443168	NA	5.88399	-0.177726	-0.053	6.17668	0.112308	0.046	5.95827	-0.0774608	NA	5.59738	0.0682026	NA
YIL006W	YIA6	4.45918	0.120459	NA	5.3187	0.097745	0.031	4.55835	0.0217374	NA	5.16262	0.0480398	NA	4.81743	0.0933251	0.037	5.17899	0.0154346	NA	5.07175	0.130094	0.006
YIL010W	DOT5	6.34231	0.0734531	NA	6.50222	0.128286	0.05	6.54906	0.0384838	NA	6.64878	-0.123167	-0.025	6.58221	0.0724018	0.01	6.71298	-0.0644918	NA	6.26575	0.057627	NA
YIL014C-A		4.49449	0.0747365	NA	4.77095	0.0283764	NA	4.61816	0.0136374	NA	4.41984	-0.0179138	NA	4.60032	-0.0309356	NA	4.74896	0.0583207	NA	4.6941	0.0861555	0.011
YIL014W	MNT3	5.68252	-0.0381813	NA	6.28574	-0.0102865	NA	6.53786	0.00736084	NA	5.9579	0.190435	0.081	6.14465	0.0709528	0.014	6.37671	0.0885735	0.025	5.93463	0.051631	NA
YIL015W	BAR1	6.86993	-0.00916846	NA	5.55772	0.0166098	NA	6.01887	-0.0126618	NA	6.95587	-0.0574426	-0.013	5.94516	-0.0125235	NA	6.38892	0.0179353	NA	6.51737	0.0105175	NA
YIL017C	VID28	5.37493	0.47548	0.264	5.74081	0.407393	0.263	5.11668	0.0127392	NA	5.47732	0.137695	0.006	5.23677	0.140071	0.037	5.36137	0.0488114	NA	5.26801	0.19276	NA
YIL018W	RPL2B	9.20731	0.116165	0.07	9.29382	0.0192025	0.007	9.9115	-0.0014979	NA	9.68258	0.020435	0.011	9.71202	0.068463	0.053	9.48171	0.0084867	0.001	9.31011	0.0122019	NA
YIL019W	FAF1	4.50576	-0.0128559	NA	5.01377	-0.00473142	NA	5.34434	0.031086	NA	5.59067	-0.0143268	NA	5.14038	0.0619949	NA	5.04965	0.00580701	NA	4.59452	0.114173	NA
YIL021W	RPB3	6.20397	0.0719025	NA	6.30191	0.114597	0.051	6.4688	0.0180882	NA	5.95758	0.034477	NA	6.23709	0.0699016	0.034	6.11484	0.0852841	0.036	6.05128	0.0111053	NA
YIL022W	TIM44	7.98145	0.279881	0.156	8.50852	0.128405	0.075	8.92395	0.0188368	NA	8.70259	0.0914435	0.049	8.90046	0.086133	0.058	8.66997	0.0799879	0.048	8.5071	0.0530606	NA
YIL023C	YKE4	6.07085	-0.167643	NA	7.16557	-0.0193874	NA	7.90111	0.0196229	NA	6.92694	-0.0380397	NA	7.60335	0.10937	0.068	7.76865	0.0527202	0.008	7.20347	0.0150382	NA
YIL026C	IRR1	4.83413	0.0113319	NA	5.15228	0.110304	0.012	5.23123	0.00633914	NA	5.53231	0.123163	0.051	5.32497	0.0651853	0.017	5.64574	0.0102378	NA	5.13647	0.0358021	NA
YIL027C	EMC5	6.79413	0.11694	0.02	6.91399	0.0478017	0.007	7.30033	0.00471521	NA	6.98139	0.113071	0.059	7.1396	0.0430714	0.019	7.25185	0.0112918	NA	6.98745	-0.00703505	NA
YIL029C		4.06509	-0.327835	-0.07	4.2129	-0.155033	-0.008	3.28941	-0.104711	NA	3.56652	-0.0373785	NA	3.49507	-0.186237	-0.039	3.65557	0.00751699	NA	3.50377	-0.106991	NA
YIL030C	SSM4	5.90986	0.180946	0.005	6.29424	0.246675	0.136	5.82803	0.0305652	NA	6.16286	0.0333584	NA	5.93042	0.274969	0.175	5.95297	0.0604862	NA	5.81299	0.158868	NA
YIL030W-A		4.80399	0.389526	0.168	5.22163	0.076739	0.018	NA	NA	NA	5.07694	0.0803312	0.025	4.81616	0.0875595	0.034	NA	NA	NA	NA	NA	NA
YIL035C	CKA1	7.34763	0.0125687	NA	7.70866	0.105066	NA	7.51719	-0.0243485	NA	7.75051	0.132609	0.032	7.5256	0.120003	0.045	7.40041	0.119588	0.032	7.37464	-0.0398757	NA
YIL036W	CST6	5.58537	0.794221	0.619	6.04677	0.761532	0.649	5.45646	0.0562561	NA	5.58833	0.427908	0.259	5.56135	0.386007	0.243	5.42982	0.289233	0.141	5.03625	0.281882	NA
YIL037C	PRM2	0.870151	0.486431	0.091	1.68133	0.283332	NA	1.01295	0.287327	NA	2.0401	0.384072	0.078	1.17778	0.216714	NA	1.09009	-0.0367513	NA	0.626365	-0.140945	NA
YIL038C	NOT3	6.08217	0.630575	0.45	6.17218	0.686013	0.566	5.63711	0.0577614	NA	5.89029	0.46413	0.327	5.68041	0.367315	0.255	5.738	0.220845	0.124	5.65955	0.325299	0.132
YIL039W	TED1	6.15745	0.620984	0.421	6.49336	0.682341	0.566	6.26964	0.0523192	NA	5.98959	0.504536	0.355	6.21221	0.257016	0.164	6.3005	0.125302	0.052	5.82218	0.170735	0.007
YIL041W	GVP36	8.1417	0.182794	0.078	8.12731	0.014934	NA	7.8255	0.033154	NA	7.98971	-0.0955246	-0.05	7.83599	0.153181	0.094	7.9649	-0.0102672	NA	7.7393	0.128034	0.028
YIL043C	CBR1	7.68508	0.251697	0.151	7.37988	0.140477	0.079	7.87483	0.0148599	NA	8.43843	0.0408461	0.022	7.87071	0.103321	0.075	7.91089	0.0538223	0.031	8.00959	0.0104343	NA
YIL044C	AGE2	5.10667	0.189272	NA	5.53598	0.293397	0.152	4.8618	0.093368	NA	5.0204	-0.0946492	NA	4.994	0.0946721	NA	5.18787	0.18287	0.055	4.89641	0.232967	NA
YIL045W	PIG2	3.36115	-0.0276573	NA	3.51835	-0.0566403	NA	2.70564	-0.00455116	NA	3.29892	0.0174503	NA	3.16204	0.036478	NA	3.07828	-0.0623586	NA	3.81916	-0.0230507	NA
YIL048W	NEO1	3.56333	0.00626563	NA	4.84435	0.0603733	NA	4.38056	0.0160591	NA	4.32343	-0.0248873	NA	4.34677	0.0747483	NA	4.41817	-0.0306663	NA	4.01436	0.0401622	NA
YIL050W	PCL7	6.05827	0.0818163	0.014	6.10979	0.0135835	NA	5.30295	0.0139103	NA	NA	NA	NA	5.60744	0.029838	0.007	5.73557	0.0134559	NA	5.80333	0.0267119	NA
YIL051C	MMF1	8.63944	0.0558614	0.014	8.66201	0.0272937	0.008	9.57515	0.00105379	NA	9.38774	0.0138215	0.006	9.45085	0.00337936	NA	9.3574	0.00135905	NA	9.29274	0.00668719	NA
YIL052C	RPL34B	10.0289	0.378666	0.293	9.90061	0.240796	0.183	10.7372	0.00865161	0	10.3546	0.335735	0.257	10.6014	0.112663	0.091	10.2374	0.0122802	0.007	9.94271	0.0516161	0.025
YIL053W	GPP1	8.97394	0.103122	0.044	8.85779	0.0612256	0.037	9.13236	0.00708197	NA	9.1164	0.201947	0.152	8.98883	0.0595239	0.043	9.2749	0.016616	0.006	8.47664	0.0331742	NA
YIL056W	VHR1	6.80092	0.162384	0.013	7.07448	0.167741	0.06	6.4686	-0.0374253	NA	6.43898	0.0457037	NA	6.5125	0.131912	0.049	6.51581	0.128473	0.037	6.38232	0.278327	0.101
YIL062C	ARC15	7.3806	0.148588	NA	7.79002	0.0228943	NA	7.88319	-0.000715962	NA	7.71805	0.125718	0.036	7.92406	0.106219	0.045	7.99904	0.064612	0.003	7.67444	0.0270989	NA
YIL063C	NA	NA	NA	NA	NA	NA	NA	6.58206	0.00223874	NA	5.92042	0.032084	NA	6.40164	0.0119871	NA	6.35851	0.00368878	NA	NA	NA	NA
YIL064W	EFM4	4.67245	-0.136136	NA	5.07791	0.0596426	NA	6.09788	0.0828562	NA	5.39861	-0.095608	NA	5.62318	0.0880602	NA	5.78208	0.0326323	NA	4.77231	0.130157	NA
YIL068C	SEC6	5.3775	0.107949	NA	5.77408	0.226005	0.079	5.92114	-0.0431413	NA	6.0091	-0.0709258	NA	6.0198	0.181298	0.084	6.10153	0.0460654	NA	5.954	-0.0982778	NA
YIL069C	RPS24B	8.53331	-0.0136293	NA	8.6448	-0.00377087	NA	8.93854	0.0018246	NA	8.98023	-0.00361079	NA	8.9147	0.000720415	NA	8.8706	0.00573323	NA	8.69094	0.00281487	NA
YIL071C	PCI8	3.54533	0.40116	0.085	4.62497	-0.057445	NA	4.49818	0.0425496	NA	4.55667	-0.115226	NA	4.19291	0.0907974	NA	4.54326	-0.108776	NA	3.99797	0.262201	0.051
YIL073C	SPO22	1.35707	-0.0967578	NA	2.0315	0.0595837	NA	2.74145	-0.0442692	NA	3.05173	0.166753	NA	2.4306	-0.0472397	NA	2.36383	0.0903782	NA	2.27684	0.148028	NA
YIL075C	RPN2	9.06603	0.400385	0.294	9.51871	0.284531	0.211	8.99878	0.0229071	NA	9.20811	0.207934	0.141	8.90974	0.211599	0.161	9.16227	0.0671367	0.04	9.0238	0.203071	0.123
YIL076W	SEC28	7.83386	0.34887	0.208	7.8003	0.31623	0.208	8.37706	0.0215967	NA	7.80306	0.307091	0.198	8.24546	0.216304	0.149	8.25297	0.295177	0.208	7.54797	0.229662	0.08
YIL077C		4.81583	0.669562	0.418	5.81707	0.5108	0.373	4.97932	0.0175734	NA	5.15096	0.110645	0.008	4.95914	0.292612	0.169	5.03514	0.125033	0.024	5.15684	0.154767	NA
YIL078W	THS1	8.15218	0.0674302	0.027	7.81665	0.0456383	0.02	7.86449	0.00949611	NA	8.03715	0.119676	0.079	7.93286	0.0983835	0.071	8.0943	-0.00335143	NA	8.01822	0.00568651	NA
YIL079C	AIR1	5.77658	-0.0414421	NA	6.66672	0.0479231	NA	6.86882	-0.0321233	NA	6.85668	-0.0794472	-0.016	6.55459	0.0274179	NA	6.65115	-0.0373032	NA	6.56299	0.0310585	NA
YIL083C	CAB2	5.23006	0.0392605	NA	5.33201	0.0147346	NA	5.62361	0.0162675	NA	5.57836	0.0134465	NA	5.35188	0.113297	0.033	5.51955	-0.052368	NA	5.06953	0.0085434	NA
YIL089W		1.90052	-0.252566	NA	2.11508	0.0571648	NA	2.4764	0.0811508	NA	2.65583	-0.00636901	NA	1.76099	-0.088651	NA	2.62571	0.0560779	NA	2.26902	-0.319517	-0.001
YIL092W		1.29907	0.120369	NA	2.61243	0.0569968	NA	2.76253	0.0703706	NA	2.94633	0.133468	NA	2.39105	0.160593	NA	2.86872	0.0446722	NA	2.27984	0.166992	NA
YIL093C	RSM25	4.9693	0.0120191	NA	5.99719	0.0338251	NA	6.36725	-0.00831317	NA	6.1178	0.0440296	NA	6.22881	0.00873337	NA	6.29456	-0.00982053	NA	5.98073	0.0302402	NA
YIL094C	LYS12	7.57269	-0.0699233	NA	7.8106	-0.0338095	NA	8.44776	-0.0245722	NA	7.70924	0.0415526	NA	8.40652	0.0631386	0.015	8.44757	0.00659532	NA	7.21285	0.0515303	NA
YIL096C	BMT5	4.34861	0.0573824	NA	4.25034	0.203406	NA	5.08701	-0.0227398	NA	4.98818	0.0857617	NA	4.85445	0.193403	0.08	4.77516	0.0348537	NA	4.45228	0.22327	NA
YIL097W	FYV10	5.33352	0.206005	NA	5.8786	0.10066	0.011	5.387	0.0084726	NA	5.59602	0.0383302	NA	5.61766	0.0525381	NA	5.53304	0.0988698	0.016	5.39333	-0.013208	NA
YIL101C	XBP1	5.01368	0.398107	0.193	5.31388	0.417996	0.271	4.15771	0.209494	NA	5.02509	-0.0317038	NA	4.38271	0.207779	0.072	4.53579	0.111911	NA	4.73156	0.225088	NA
YIL104C	SHQ1	4.07205	0.56185	0.212	4.67655	0.475926	0.278	5.14803	0.0716147	NA	5.29766	0.239592	0.122	5.06795	0.400252	0.258	5.06561	0.284589	0.14	5.24523	0.311074	0.108
YIL105C	SLM1	5.29214	-0.0886246	NA	5.45215	-0.15303	NA	5.51674	-0.0598679	NA	5.75965	0.286336	0.145	5.73781	-0.0161517	NA	5.83385	0.051641	NA	5.42391	0.0288301	NA
YIL107C	PFK26	6.78547	0.0758145	NA	6.53801	0.0645262	NA	5.62662	-0.0138073	NA	5.64338	-0.111683	NA	5.93541	0.00839135	NA	6.104	0.0295211	NA	5.74585	-0.0262034	NA
YIL108W		6.77576	0.385945	0.208	6.81631	0.397133	0.267	7.27513	0.0102234	NA	6.83289	0.202926	0.091	6.97292	0.176317	0.095	7.44398	0.0503695	NA	7.17138	0.172588	0.038
YIL109C	SEC24	5.7979	0.361436	0.141	6.21475	0.159652	0.048	6.55476	-0.0361314	NA	5.94197	0.0895213	NA	6.2501	0.234665	0.143	6.41267	0.0688073	NA	5.83935	0.0628886	NA
YIL110W	HPM1	4.18643	0.131877	NA	4.50922	0.0270052	NA	4.91969	0.0398284	NA	4.58361	0.0447785	NA	4.95515	0.0252368	NA	4.94464	-2.24503e-05	NA	4.55595	0.0211864	NA
YIL111W	COX5B	6.2913	-0.218266	-0.019	6.31983	-0.0205254	NA	7.08507	-0.0339911	NA	6.76197	-0.107251	NA	7.09692	0.106532	0.033	6.83948	0.00713219	NA	6.08599	-0.124813	NA
YIL112W	HOS4	3.88546	-0.0814043	NA	4.90267	0.207576	0.04	5.17748	-0.0695742	NA	5.10544	0.15812	0.013	4.88938	0.140731	0.026	4.79854	0.0604104	NA	3.50474	0.0506475	NA
YIL114C	POR2	3.93121	0.636399	0.387	4.61595	0.402827	0.211	4.68152	0.0834082	NA	4.89465	0.184389	0.043	4.65058	0.355629	0.201	4.69491	0.106279	NA	4.82955	0.542502	0.293
YIL115C	NUP159	5.26952	0.661234	0.43	5.54772	0.559949	0.404	5.55023	0.0379176	NA	5.34613	0.547506	0.379	5.44001	0.286441	0.176	5.65644	0.212642	0.106	5.57523	0.416924	0.195
YIL118W	RHO3	6.22593	-0.0896544	NA	6.53775	0.0839605	NA	6.54835	-0.0981561	NA	6.53201	-0.132873	-0.028	6.7148	-0.0546527	NA	6.35319	0.0131809	NA	6.50948	0.074655	NA
YIL119C	RPI1	3.51008	0.0645086	NA	4.70684	0.0702812	NA	5.00559	-0.0247792	NA	4.88793	-0.340753	-0.161	4.87098	-0.0147343	NA	5.17306	-0.110819	-0.006	4.41417	0.0714866	NA
YIL121W	QDR2	2.17923	0.0108473	NA	2.68647	-0.0688845	NA	2.68538	-0.0436698	NA	2.98944	-0.0934022	NA	2.43	0.0508012	NA	2.94932	-0.0621905	NA	1.99515	-0.0780192	NA
YIL123W	SIM1	9.92434	0.0119575	NA	10.0179	0.0204718	0.007	10.5347	0.00533993	NA	10.5459	0.00933863	NA	10.4733	0.00742296	NA	10.4818	0.0098892	NA	9.94152	0.015456	NA
YIL124W	AYR1	6.81936	0.0851798	0.009	7.33342	0.0482349	0.016	7.43021	0.00930229	NA	7.39724	0.0622851	0.03	7.4464	0.0957883	0.066	7.62873	0.0134635	NA	7.0985	0.0291899	NA
YIL125W	KGD1	6.01839	0.0752593	NA	6.26872	0.123693	0.044	5.67158	-0.0281603	NA	5.90005	0.00971301	NA	5.81942	0.0714671	NA	5.73045	0.0425663	NA	5.76748	0.0959797	NA
YIL127C	RRT14	5.08384	0.209122	NA	5.5905	0.0301699	NA	6.2731	-0.0352093	NA	5.96672	0.112279	0.02	5.7934	0.0125317	NA	5.95006	0.0754647	NA	5.62972	-0.046907	NA
YIL128W	MET18	5.33179	0.397461	0.177	6.01603	0.0865078	0.028	5.62622	0.0125762	NA	5.61905	0.138884	0.062	5.56566	0.124437	0.067	5.68191	0.0717041	0.02	5.5452	0.0684307	NA
YIL129C	TAO3	4.93628	0.434763	0.156	5.404	0.297061	0.16	5.39834	0.0399453	NA	5.24912	0.108042	0.024	5.52819	0.150487	0.078	5.30262	0.120437	0.037	5.00135	0.148278	NA
YIL130W	ASG1	4.5353	0.168331	NA	4.26979	0.0748405	NA	3.9492	0.0184543	NA	3.91595	0.583707	0.368	3.96592	0.360209	0.196	4.00315	0.199944	0.057	3.42024	0.318982	NA
YIL131C	FKH1	6.1193	0.0184949	NA	5.95351	0.0172318	NA	6.34654	-0.00860959	NA	6.04774	0.0236392	NA	6.53925	0.070737	0.037	6.34172	-0.020367	-0.001	5.81058	0.0904628	NA
YIL132C	CSM2	3.44683	0.0283401	NA	3.57223	-0.139471	NA	4.19314	0.02232	NA	4.17863	-0.287613	-0.116	4.3914	0.0182589	NA	3.94571	-0.046362	NA	3.40214	-0.0555484	NA
YIL133C	RPL16A	8.97039	0.213414	0.128	8.91133	0.149668	0.086	9.25646	-0.000186527	NA	9.10338	0.140155	0.08	9.18986	0.194558	0.145	8.90202	0.106168	0.064	8.25251	0.118819	0.029
YIL134W	FLX1	3.71626	0.141257	NA	4.22845	0.166603	NA	4.6951	0.0275332	NA	4.94266	0.027828	NA	4.60611	0.0733815	NA	4.64312	0.0973649	NA	4.00013	-0.0419664	NA
YIL135C	VHS2	6.33479	0.094476	0.019	6.67259	0.0402416	0.011	5.93334	0.00269224	NA	6.2743	0.0856776	0.041	6.0239	0.112519	0.068	6.48229	0.0409769	0.016	6.42901	0.0229559	NA
YIL136W	OM45	5.93081	0.440778	0.244	6.24418	0.35823	0.224	5.84972	0.151649	NA	6.12689	0.315044	0.18	6.25645	0.32666	0.215	6.02875	0.399946	0.249	6.12865	0.409455	0.217
YIL137C	TMA108	5.64302	0.273753	0.079	6.28616	0.133069	0.057	6.2407	-0.00798674	NA	6.47475	0.113969	0.052	6.16985	0.184272	0.118	6.45844	0.0031502	NA	5.92213	0.0970926	NA
YIL143C	SSL2	5.64587	0.0782239	NA	5.91916	0.0019382	NA	5.07418	0.0458323	NA	5.20896	0.117984	0.047	5.22685	0.103246	0.052	5.42155	0.0382717	NA	5.46959	0.00465415	NA
YIL144W	NDC80	5.43086	0.305773	0.166	5.71991	0.18836	0.077	5.05216	0.0810797	NA	5.22448	-0.221776	-0.074	5.04198	0.150904	0.05	5.34114	0.0674143	NA	4.89543	0.154376	NA
YIL146C	ATG32	5.12217	0.320358	0.145	5.23236	0.221686	0.094	4.68535	0.0618908	NA	4.79495	0.113405	NA	4.83044	0.235802	0.121	4.6941	0.173828	0.039	4.54817	0.195175	NA
YIL147C	SLN1	6.53462	0.0556572	NA	7.08648	0.0220567	NA	7.37661	-0.0109824	NA	7.5736	0.0300892	NA	7.54031	0.0608523	0.028	7.42307	-0.0019083	NA	6.99488	0.0600866	NA
YIL148W	RPL40A	10.2417	0.0137177	NA	10.0813	0.0138221	0.004	10.5901	0.00341626	NA	10.4844	0.0183056	0.008	10.4729	0.0397356	0.029	10.4809	0.00239406	NA	10.0756	0.0192328	0.002
YIL149C	MLP2	3.77122	0.481735	0.132	4.592	0.255785	0.1	4.43953	0.00290164	NA	4.54459	0.124494	0.015	4.31067	0.279528	0.146	3.98815	0.101881	NA	3.08263	0.241465	NA
YIL150C	MCM10	0.721415	-0.128861	NA	2.01666	0.0716805	NA	1.85122	-0.0361638	NA	2.74192	-0.138442	NA	1.18528	0.134061	NA	1.89369	-0.0540546	NA	1.76564	-0.164786	NA
YIL151C	ESL1	3.76761	0.475203	0.159	4.09452	0.343628	0.158	3.93144	0.0574851	NA	3.9251	0.230959	0.08	3.72018	0.136969	0.03	3.76568	0.15671	0.028	3.44421	0.13959	NA
YIL152W		5.97798	-0.293532	-0.099	6.45211	0.0342015	NA	5.7858	-0.101495	NA	5.97785	0.0119285	NA	5.91216	-0.0480037	NA	5.73107	-0.0249059	NA	5.90092	-0.269064	-0.08
YIL153W	RRD1	6.68935	0.128144	0.048	6.99634	0.0490129	0.018	6.50048	0.00657133	NA	6.39741	0.0409801	0.008	6.4061	0.10516	0.066	6.48581	-0.000516692	NA	6.51723	0.0362045	NA
YIL154C	IMP2'	5.79787	-0.0116022	NA	6.09358	0.0188012	NA	7.06549	-0.00723007	NA	6.76597	0.111606	0.051	6.61589	0.00846051	NA	6.73892	0.0357505	NA	6.32712	0.038797	NA
YIL156W	UBP7	5.63999	0.334307	0.159	5.71448	0.2744	0.141	5.90899	0.0407016	NA	6.0462	0.258044	0.14	5.9777	0.231026	0.137	5.84783	0.140734	0.039	5.37215	0.270739	0.075
YIL157C	COA1	6.43544	0.0050811	NA	6.30322	0.0108011	NA	6.52368	-0.0165353	NA	6.72153	-0.00186962	NA	6.54654	0.023504	NA	6.67863	0.0332436	NA	6.62107	0.0620208	0.02
YIL159W	BNR1	5.31737	0.29842	0.16	5.57726	0.303331	0.193	5.38248	0.0714619	NA	5.48926	0.07519	NA	5.4289	0.240384	0.145	5.36163	0.229009	0.105	5.4526	0.164073	NA
YIL165C		6.03634	0.393598	0.225	5.85605	0.339883	0.218	5.54492	0.026798	NA	5.70591	0.0375689	NA	5.31261	0.1497	0.071	5.66988	0.0599549	NA	5.11451	0.0620497	NA
YIL172C	IMA3	2.28637	0.243995	NA	2.14021	0.212041	NA	1.04345	-0.106293	NA	1.65467	0.144674	NA	1.19642	0.230913	NA	1.38028	-0.0618715	NA	0.929003	-0.091447	NA
YIR001C	SGN1	6.15492	0.0870637	0.039	6.4306	0.0715647	0.032	5.6631	0.0193385	NA	5.87065	-0.0733453	NA	5.68038	0.0540299	0.016	6.04345	0.0412086	NA	5.908	0.0611533	0.005
YIR004W	DJP1	5.36983	0.134666	NA	5.62314	0.0852855	NA	5.37485	0.0605187	NA	5.49258	-0.186115	-0.064	5.16898	0.123011	0.052	5.57933	0.0357346	NA	5.84861	0.11315	0.012
YIR006C	PAN1	7.6263	0.145849	0.066	7.86751	0.176079	0.116	7.93753	0.0100118	NA	7.60313	0.212151	0.141	7.96806	0.134324	0.098	7.8431	0.0367967	0.015	7.39276	0.0688694	NA
YIR007W		4.34921	0.26151	NA	4.2566	0.352056	0.129	5.2442	0.0144693	NA	4.88575	0.0826553	0.012	5.11814	0.0847534	0.035	5.00354	0.161113	0.074	NA	NA	NA
YIR008C	PRI1	4.21894	0.368574	NA	5.01074	0.326976	0.155	5.34859	0.0663895	NA	5.30385	0.411071	0.256	5.2005	0.250411	0.141	5.54998	0.117427	0.03	5.14056	0.315654	0.086
YIR017C	MET28	4.99466	0.146422	NA	5.17493	0.152426	NA	5.34007	-0.00507778	NA	5.19004	-0.081886	NA	5.22232	0.202748	0.09	5.29529	0.186398	0.06	5.2919	0.202063	NA
YIR022W	SEC11	7.06422	-0.000442346	NA	7.28863	0.0189162	NA	8.3294	-0.00313517	NA	7.25357	0.125819	0.069	8.14528	0.0122162	0.002	7.94713	-0.000252906	NA	7.54447	0.0108212	NA
YIR023W	DAL81	4.28569	0.353625	0.039	4.90771	0.100901	NA	5.30831	0.00168364	NA	4.76603	0.340856	0.174	5.1003	0.120003	0.051	4.91055	0.162243	0.057	4.3295	0.242529	NA
YIR024C	INA22	5.21571	-0.0361946	NA	5.56978	-0.0758191	NA	4.90797	-0.0938119	NA	4.52329	0.179623	0.021	4.83687	0.0217122	NA	5.07238	0.0676074	NA	4.90965	-0.0688896	NA
YIR025W	MND2	4.09455	0.0311701	NA	5.12951	0.00267296	NA	5.11433	0.00102671	NA	5.13933	-0.0251692	NA	4.73788	0.0690853	NA	5.0595	-0.0168777	NA	5.00038	0.13949	NA
YIR026C	YVH1	4.80755	0.18292	NA	5.24573	0.140755	0.012	6.09548	0.0207251	NA	5.73548	0.280308	0.156	5.76118	0.242917	0.151	5.74947	0.161774	0.067	5.62046	0.172431	NA
YIR029W	DAL2	4.36936	0.0267914	NA	4.30833	0.0361467	NA	3.82255	0.00447426	NA	4.00269	0.0930357	NA	3.67296	0.186048	0.063	3.79568	0.00109441	NA	3.99121	0.0900858	NA
YIR030C	DCG1	4.35829	0.0401102	NA	4.66348	0.0925348	NA	5.0622	-0.00311945	NA	4.15501	0.00736591	NA	4.86716	0.101729	0.035	4.46722	0.0430499	NA	4.46999	0.0528665	NA
YIR031C	DAL7	5.0503	0.0792734	NA	5.44991	0.0289925	NA	5.18974	-0.00721496	NA	5.23944	0.0464182	NA	5.08243	0.0562646	0.009	5.46976	0.0193355	NA	5.49957	0.0309394	NA
YIR033W	MGA2	5.33994	0.161919	NA	5.16118	0.00408553	NA	5.34212	-0.0153304	NA	5.65056	0.105328	0.041	5.68754	0.048691	0.009	5.30523	0.0388875	NA	5.16467	-0.00519047	NA
YIR034C	LYS1	8.4932	0.0931952	0.049	8.40544	0.137937	0.092	7.5433	0.0172402	NA	7.79633	0.0964059	0.056	7.7923	0.129019	0.094	8.23084	-0.0018121	NA	7.45745	0.13909	0.057
YIR035C		5.47475	0.0425487	NA	5.84309	0.0410023	NA	6.59537	0.00289271	NA	6.09761	0.0513508	NA	6.25023	0.00832771	NA	5.98558	0.00359169	NA	5.8721	0.0370977	NA
YIR036C	IRC24	5.73125	-0.0563392	-0.023	5.94689	0.0575996	NA	6.77589	0.0377541	NA	5.96057	0.388607	0.238	6.34851	0.0464165	NA	6.70322	0.0844761	0.03	6.42459	0.0312314	NA
YIR037W	HYR1	7.31588	0.107772	NA	7.00996	0.155887	0.041	7.63666	-0.0116737	NA	7.54945	0.101942	NA	7.71783	0.118192	0.045	7.69161	0.1019	0.028	7.56985	0.135954	NA
YIR038C	GTT1	7.97123	0.0653879	0.025	7.89473	0.094381	0.057	7.26925	0.0124601	NA	7.85564	0.0340412	0.013	7.32664	0.0594236	0.035	7.49621	0.0076925	NA	7.8223	0.0343942	NA
YIR042C		2.43374	0.121061	NA	3.87852	-0.00228826	NA	3.83505	-0.0559662	NA	4.08652	-0.173464	NA	3.69898	0.031767	NA	3.85091	0.0289039	NA	3.10933	0.0737639	NA
YJL001W	PRE3	8.05622	0.460958	0.333	8.62143	0.159374	0.092	8.19989	0.0543048	NA	8.53413	0.0895317	0.033	8.12992	0.218196	0.155	8.35081	0.18053	0.119	8.19383	0.19811	0.097
YJL002C	OST1	9.29115	0.00798022	NA	9.41701	0.00735743	0.002	9.15727	0.00147833	NA	9.31991	0.011172	0.005	9.27266	0.00994147	0.006	9.31075	0.00149857	NA	9.37952	0.00674207	NA
YJL003W	COX16	4.25718	-0.00265975	NA	4.34835	0.0936013	NA	4.5498	0.0285338	NA	4.54495	0.253025	0.075	4.59786	0.315613	0.162	4.57371	-0.0348771	NA	3.81328	-0.024744	NA
YJL004C	SYS1	5.64225	-0.0159898	NA	5.57981	0.139119	NA	6.11365	0.0321389	NA	6.18446	0.122202	0.015	6.05199	0.203366	0.113	5.88348	0.115401	0.008	5.66427	0.182463	NA
YJL005W	CYR1	7.82733	0.315655	0.18	7.70563	0.427691	0.317	7.22106	0.105524	NA	7.49427	0.35517	0.232	7.46039	0.37284	0.268	7.36445	0.0433564	NA	7.24189	0.276032	0.123
YJL008C	CCT8	7.49485	0.641513	0.502	7.68954	0.554787	0.444	7.48784	-0.00786601	NA	7.65841	0.0230244	NA	7.35979	0.321341	0.22	7.37807	0.223419	0.117	7.50507	0.0720198	NA
YJL010C	NOP9	5.59778	0.228746	0.038	5.33693	-0.026799	NA	5.54169	0.0241765	NA	5.47182	0.137141	0.019	5.51698	0.337131	0.207	5.27598	0.044246	NA	4.71398	0.0788243	NA
YJL011C	RPC17	4.59322	0.224742	NA	5.21722	0.0509656	NA	5.37578	-0.000887201	NA	5.14511	0.0563069	NA	5.22147	0.211447	0.102	5.26351	-0.0143714	NA	4.64787	0.279191	NA
YJL012C	VTC4	7.79357	0.128889	0.065	7.86769	0.119871	0.075	7.3455	0.01411	NA	7.27222	0.0380162	0.01	7.26709	0.157148	0.111	7.71141	-0.00326824	NA	7.26243	0.0217968	NA
YJL013C	MAD3	5.19545	0.15216	NA	5.3801	0.0563856	NA	5.25879	-0.00342188	NA	5.33078	0.284454	0.135	5.29246	0.265859	0.145	5.45076	0.104626	NA	4.91379	0.197648	NA
YJL014W	CCT3	6.06573	0.577584	0.403	6.26774	0.585609	0.464	5.70397	0.142265	NA	6.21734	0.329054	0.202	5.79463	0.435439	0.307	6.01838	0.159096	0.06	5.74779	0.357129	0.142
YJL020C	BBC1	5.80762	0.476385	0.255	6.19636	0.165043	0.081	6.48239	0.0459024	NA	6.49738	0.299333	0.2	6.65947	0.210495	0.152	6.85964	0.113426	0.07	6.26557	0.122099	0.02
YJL023C	PET130	4.09156	0.223433	NA	4.06889	0.427427	0.221	3.97904	0.0397069	NA	4.76779	0.0580184	NA	4.11158	0.0974597	0.013	4.10147	0.136227	0.026	3.90518	0.248495	NA
YJL024C	APS3	6.93227	0.511931	0.349	7.19141	0.466006	0.347	7.51969	0.0497093	NA	7.23527	-0.214303	-0.104	7.46019	0.19029	0.113	7.30094	0.0438898	NA	6.7205	0.240101	0.042
YJL025W	RRN7	3.95984	0.0248103	NA	4.1519	0.0712753	NA	4.27167	0.0357135	NA	4.24081	0.156922	0.029	4.14864	0.221615	0.092	4.44257	0.0367832	NA	4.23369	0.111512	NA
YJL026W	RNR2	8.21928	0.260619	0.161	8.09735	0.253121	0.179	8.1544	0.00961396	NA	8.44715	0.0291348	0.016	8.28924	0.0960929	0.071	8.527	0.00944399	0.003	8.57908	0.0122958	0
YJL031C	BET4	5.18715	0.36106	0.134	5.84046	0.159907	0.072	5.52207	0.0125091	NA	5.91444	0.0337895	NA	5.42547	0.199185	0.116	5.6404	0.0567681	NA	5.69947	0.119698	NA
YJL034W	KAR2	10.4752	0.10722	0.069	10.125	0.100869	0.065	11.1671	0.0164498	NA	10.5545	0.0570616	0.031	10.8836	0.12997	0.106	11.3163	0.037432	0.024	10.3438	0.0393649	0.011
YJL035C	TAD2	6.15318	0.0429104	NA	5.93443	0.0349749	NA	6.83493	0.00489693	NA	6.49112	0.00171913	NA	6.09594	-0.00129672	NA	6.44918	0.00424026	NA	6.07552	0.0242844	NA
YJL039C	NUP192	7.73104	0.00455888	NA	8.22967	0.013658	NA	8.29492	-0.00541755	NA	7.94242	-0.0177994	NA	8.47868	0.0216601	0.008	7.90933	-0.0291379	-0.003	7.75624	-0.00448513	NA
YJL042W	MHP1	5.62006	0.152158	0.016	5.59192	0.0519006	NA	5.33464	-0.05305	NA	5.59856	0.113013	0.019	5.7818	0.0779483	0.033	5.47927	-0.063959	NA	5.26049	-0.0600273	NA
YJL044C	GYP6	5.91833	-0.0143875	NA	6.07436	0.0957852	NA	6.67658	0.00898378	NA	6.62156	0.189157	0.092	6.44624	0.16896	0.096	6.35109	0.141487	0.06	5.84294	0.142199	NA
YJL045W		4.09353	0.228569	NA	4.91954	-0.0769986	NA	4.20427	0.0150417	NA	4.41566	0.187311	0.045	4.40815	0.104676	NA	4.02535	0.0799509	NA	4.5436	0.0450993	NA
YJL046W	AIM22	5.11591	0.180275	NA	6.0986	0.106459	NA	6.53047	-0.0405486	NA	6.33691	0.00362354	NA	6.12604	0.0926026	NA	6.44108	0.0975686	0.007	5.86412	0.0317767	NA
YJL047C	RTT101	4.92493	0.0580526	NA	5.34369	-0.0335655	NA	5.4151	-0.0341747	NA	5.00291	0.0411943	NA	5.21673	0.00976061	NA	5.34425	0.0129258	NA	4.91806	0.0496384	NA
YJL047C-A		5.87985	0.250532	0.118	5.03448	0.147388	0.032	4.61873	0.162421	NA	4.55792	0.030883	NA	4.66672	0.168719	0.068	3.6472	-0.327664	-0.076	4.97693	-0.355031	-0.114
YJL048C	UBX6	6.43555	0.492089	0.332	6.79429	0.408968	0.304	6.20629	0.157255	0.031	6.06223	0.372706	0.237	6.52653	0.383016	0.286	6.37281	0.238497	0.151	5.59625	0.254986	0.058
YJL050W	MTR4	7.11365	0.141537	0.058	7.09558	0.0438971	0.015	7.34713	0.00432327	NA	NA	NA	NA	7.31473	0.029556	0.016	NA	NA	NA	NA	NA	NA
YJL051W	IRC8	4.01517	0.485636	0.222	4.60239	0.173289	NA	5.04881	-0.0317189	NA	4.68109	0.152096	NA	5.05621	0.10222	NA	4.88476	0.219925	0.07	4.28523	0.104715	NA
YJL053W	PEP8	5.91884	0.0422309	NA	6.24079	0.0458446	NA	6.60313	0.00246466	NA	6.4222	0.106672	0.054	6.68238	0.0360583	0.016	6.89614	0.0242251	0.006	6.03221	0.00429826	NA
YJL054W	TIM54	6.12609	0.578025	0.408	6.42713	0.401202	0.271	6.00102	0.0177016	NA	5.9305	0.0781443	NA	5.78652	0.21631	0.111	6.05695	0.291515	0.154	6.34943	0.481861	0.308
YJL055W		7.83562	0.0382357	NA	8.27023	0.00452318	NA	8.56779	0.00263011	NA	8.58321	0.0221373	0.01	8.74361	0.00539416	NA	8.53942	0.0125829	0.004	8.0248	0.00627561	NA
YJL057C	IKS1	5.5212	0.102165	NA	5.78663	0.142669	0.074	5.19827	0.028698	NA	5.38312	0.0505113	0.005	5.34154	0.142334	0.085	5.71009	0.00170345	NA	5.337	0.0480903	NA
YJL061W	NUP82	4.48315	0.314938	NA	5.78975	0.224458	0.081	6.40416	0.0036016	NA	5.84059	0.239475	0.101	6.08563	0.0576383	NA	6.34616	0.147648	0.05	5.6041	0.0606604	NA
YJL062W	LAS21	6.77891	0.018856	NA	7.03794	0.0525528	0.017	7.40467	0.00293734	NA	7.06173	0.0682447	0.032	7.3262	0.0329997	0.016	7.20866	0.0423773	0.018	6.83158	0.0502566	NA
YJL063C	MRPL8	6.04935	0.0391182	NA	6.39228	0.0183592	NA	6.73059	0.00926143	NA	6.49422	0.0513958	0.005	6.59346	0.0129926	NA	6.73742	0.0232739	NA	6.19252	0.0204588	NA
YJL068C		6.742	0.0942505	0.023	6.7695	0.0682895	0.03	6.64651	0.00235123	NA	6.14538	0.115212	0.053	6.70792	0.032303	0.014	6.73393	0.01467	NA	6.53162	0.00188705	NA
YJL069C	UTP18	6.81186	-0.00367492	NA	7.15455	0.00629739	NA	7.0684	-0.00301511	NA	6.84111	0.021634	NA	6.91726	0.019252	0.005	6.89114	0.00956821	NA	6.82484	0.0110658	NA
YJL071W	ARG2	5.19214	0.328052	0.097	5.70458	0.0499377	NA	5.6539	0.0096774	NA	5.64041	0.114005	0.031	5.67728	0.103842	0.042	5.62416	0.159444	0.068	5.2362	0.0518822	NA
YJL072C	PSF2	2.92819	0.0954877	NA	4.21917	-0.0285443	NA	4.59198	0.0422396	NA	4.12374	0.197017	NA	4.30848	0.103562	NA	4.61503	-0.0386854	NA	3.77519	0.0275954	NA
YJL076W	NET1	6.16069	0.56808	0.36	6.26761	0.512791	0.367	6.32264	0.134758	NA	6.53711	0.432606	0.291	6.34693	0.468281	0.337	6.44744	0.141674	0.043	5.98384	0.168785	NA
YJL077W-B		1.98219	0.184916	NA	3.22389	0.0307395	NA	3.50661	0.00166606	NA	3.97819	0.0230095	NA	2.74661	0.176833	NA	3.31814	-0.153896	NA	3.55854	0.000147052	NA
YJL080C	SCP160	8.43651	0.0264835	0.001	8.54457	0.00356144	NA	8.72444	0.000837816	NA	8.55595	0.00720767	0	8.67693	0.0106942	0.005	8.81484	0.00463303	NA	8.81578	0.0009467	NA
YJL081C	ARP4	4.84303	0.212576	NA	5.66044	0.17363	0.013	6.16843	0.0125768	NA	6.31264	0.0718156	NA	6.05283	0.219126	0.116	6.22581	0.161636	0.049	5.66547	0.413885	0.158
YJL082W	IML2	6.38151	0.0215759	NA	6.4538	0.0283257	NA	6.42755	0.0104268	NA	6.43916	0.0310839	NA	6.70812	0.0880481	0.054	7.07396	0.0143	NA	6.65086	0.0106252	NA
YJL083W	TAX4	3.75848	0.0234975	NA	4.39526	-0.0458354	NA	4.42995	0.00885182	NA	4.54663	-0.251299	-0.099	3.85168	0.00601229	NA	4.46801	0.0498988	NA	3.803	-0.0641169	NA
YJL084C	ALY2	5.18012	0.0167166	NA	5.8221	-0.02685	NA	5.30213	-0.0234951	NA	5.22091	0.0695021	NA	5.39379	-0.00211099	NA	5.46566	-0.0111961	NA	5.41693	-0.0104687	NA
YJL085W	EXO70	5.23564	0.137888	NA	5.77685	-0.00721594	NA	5.72328	0.00589293	NA	5.37689	0.0193451	NA	5.78301	0.0596457	0.021	5.91314	0.0127044	NA	5.37911	0.115314	NA
YJL088W	ARG3	6.42735	0.101088	0.025	6.55177	0.10281	0.055	6.08363	0.0218952	NA	NA	NA	NA	6.58373	0.09422	0.063	7.11518	0.0453673	0.027	6.79022	0.0408671	0.004
YJL091C	GWT1	5.4582	0.508099	0.26	5.79105	0.152277	NA	6.90199	0.0419637	NA	6.17365	0.0721264	NA	6.54928	0.138684	0.056	6.97872	0.0942388	0.023	5.95954	0.145044	NA
YJL092W	SRS2	6.05222	-0.0749017	NA	6.24592	0.10522	NA	6.89124	-0.0424832	NA	6.32112	-0.0526197	NA	6.95633	0.115797	0.039	6.69927	-0.00927849	NA	6.57355	0.0779559	NA
YJL093C	TOK1	5.06359	0.221326	NA	5.4122	0.191881	0.05	5.58923	0.0723702	NA	5.84081	0.269532	0.133	5.74664	0.345763	0.223	5.74902	0.170096	0.058	5.37049	0.209351	NA
YJL099W	CHS6	4.46341	0.0113246	NA	5.39944	-0.0120928	NA	5.38414	0.00850138	NA	5.28226	-0.106757	-0.032	5.39949	0.00898162	NA	5.40905	-0.0337886	NA	4.91643	-0.0963021	NA
YJL100W	LSB6	5.97204	0.0408927	NA	6.49455	0.106697	0.053	6.09997	0.0398078	NA	5.6947	0.106112	0.038	6.24735	0.0721399	0.04	6.17506	0.0362643	0.007	5.64569	0.0139179	NA
YJL101C	GSH1	4.85499	-0.0969133	NA	5.74022	0.0741208	NA	5.6898	-0.056268	NA	6.21459	0.173826	0.058	5.77376	0.0941497	NA	5.79166	-0.126207	-0.009	5.14223	-0.121414	NA
YJL102W	MEF2	5.7038	0.120898	NA	5.30059	-0.0587676	NA	5.02861	-0.110428	NA	4.62143	-0.182609	NA	4.73521	0.0029821	NA	4.5571	-0.0680853	NA	5.0561	-0.487866	-0.27
YJL103C	GSM1	6.27899	0.075393	0.003	6.4776	0.0638852	0.024	5.81455	0.0150841	NA	5.53233	0.0450208	NA	5.99475	0.0280204	NA	5.59586	0.0297857	NA	5.27259	0.0137832	NA
YJL104W	PAM16	6.64901	0.0077812	NA	6.75079	0.219166	0.1	7.17932	0.0388009	NA	7.13527	0.152278	0.056	7.33576	0.21587	0.136	7.07141	-0.0690537	-0.013	6.88496	0.252005	0.091
YJL108C	PRM10	5.21924	0.455495	0.231	5.51357	0.355228	0.204	4.83633	0.00862466	NA	4.79607	0.320658	0.141	4.91896	0.429636	0.269	4.94444	0.211703	0.064	4.45513	0.274439	NA
YJL109C	UTP10	7.5488	0.0128291	NA	7.70916	0.0316984	0.01	8.10828	0.00366705	NA	7.83099	0.084835	0.053	7.97142	0.0353181	0.022	7.78448	0.0123531	0.001	7.73634	0.0189519	NA
YJL110C	GZF3	4.89354	0.337122	0.11	4.9944	0.230625	0.098	4.37344	0.0579607	NA	4.83479	-0.068869	NA	4.61541	0.257479	0.134	4.66112	0.0471716	NA	4.73419	0.100213	NA
YJL111W	CCT7	7.96153	0.334155	0.204	8.21727	0.277524	0.182	8.22443	-0.0249118	NA	8.30694	-0.11044	-0.018	8.18923	0.104922	0.037	7.94267	0.0172295	NA	7.82212	0.000393032	NA
YJL112W	MDV1	5.27337	0.255321	0.092	5.70467	0.121572	0.052	5.47844	0.00356213	NA	5.71446	0.0335407	NA	5.72614	0.108625	0.066	5.59756	0.0236799	NA	NA	NA	NA
YJL116C	NCA3	4.51381	0.166713	0.006	5.43564	0.0988579	NA	3.2303	-0.00301839	NA	4.67065	-0.376541	-0.195	3.81027	0.0421506	NA	3.86974	-0.075207	NA	4.65375	0.166927	NA
YJL117W	PHO86	6.30052	0.0409962	NA	6.79201	0.0501414	NA	6.80194	0.0193534	NA	6.8919	-0.0404535	NA	6.88892	0.0960746	0.061	6.92145	0.0569541	0.025	6.76122	0.0769369	0.008
YJL118W		5.81977	0.00686284	NA	6.51511	0.120274	0.065	7.23813	-0.0171489	NA	7.20923	0.0525509	NA	6.90742	-0.0197652	NA	7.2644	0.0719709	0.028	6.85896	0.0650498	NA
YJL121C	RPE1	6.8513	0.36397	0.165	6.90213	0.348592	0.21	8.09788	0.0605563	NA	7.20563	0.515262	0.382	8.0016	0.185115	0.128	7.71747	0.22268	0.145	7.68638	0.141193	0.036
YJL123C	MTC1	10.1844	-0.0461015	-0.006	9.99931	0.0577276	0.011	9.8724	0.0129534	NA	10.1351	0.021616	NA	9.96636	0.0656674	0.029	10.0109	0.0325858	NA	10.3208	-0.0613228	-0.017
YJL124C	LSM1	6.83366	0.360213	0.2	6.77415	0.402866	0.278	6.78538	0.00505957	NA	6.95296	0.209938	0.113	6.78972	0.245274	0.162	6.75188	0.0909177	0.027	6.33229	0.267805	0.081
YJL127C-B		5.29153	-0.287745	NA	5.85102	0.138306	0.036	6.69454	-0.0159363	NA	6.47201	0.0891564	NA	6.15077	0.0802544	0.01	6.21499	0.0753184	NA	5.83357	-0.0564715	NA
YJL128C	PBS2	5.40719	0.220477	NA	6.09015	0.106692	NA	6.22894	0.0173875	NA	6.09713	-0.0506529	NA	6.04827	0.205734	0.107	6.38393	0.0679185	NA	5.88756	-0.0625745	NA
YJL131C	AIM23	4.28517	0.175329	NA	4.63376	0.195972	0.054	4.44949	0.0173844	NA	5.08028	0.179752	0.07	4.3512	0.165892	0.056	4.41841	0.0695592	NA	4.44655	0.150339	NA
YJL133W	MRS3	5.7705	0.0657248	NA	5.8046	0.0159638	NA	5.39872	-0.00748343	NA	5.28154	0.0162173	NA	5.1825	0.112369	0.054	5.47445	-0.00311102	NA	5.40038	0.00999306	NA
YJL134W	LCB3	6.35758	0.173328	0.036	6.11783	0.0451696	NA	6.56353	0.0255474	NA	6.3036	0.074699	0.002	6.52329	0.200721	0.13	6.46742	0.0112259	NA	6.43752	-0.0196569	NA
YJL136C	RPS21B	9.72548	0.100741	0.043	10.2368	0.0770874	0.054	10.8323	0.0139368	NA	10.6458	0.275198	0.213	10.8174	0.0705215	0.053	10.4196	0.0919976	0.068	10.2276	0.0399888	0.006
YJL138C	TIF2	8.55021	0.091985	0.044	8.41238	0.0900084	0.056	8.08844	0.0155244	NA	8.33141	0.0323886	0.009	8.01357	0.106137	0.077	8.42457	0.0281534	0.008	8.51029	0.0207344	NA
YJL140W	RPB4	6.79127	0.320542	0.148	6.8902	0.191564	0.081	7.37268	0.0310656	NA	6.88486	0.151194	0.052	7.34828	0.215138	0.137	7.20596	0.111487	0.039	6.75542	0.114984	NA
YJL142C	IRC9	6.08863	0.0488301	NA	6.3858	0.00175725	NA	5.47187	-0.0102248	NA	5.79783	0.0290692	NA	5.8074	0.0950898	0.051	5.71503	0.00906587	NA	5.34238	0.0547652	NA
YJL143W	TIM17	7.34154	0.295048	0.155	7.61493	0.149236	0.055	7.84528	0.0416621	NA	7.68883	0.0636118	NA	7.79395	0.230255	0.156	7.76511	0.195813	0.116	7.10722	0.306502	0.133
YJL146W	IDS2	4.77299	0.179225	0.05	5.56955	0.0819015	0.024	4.97555	0.0323105	NA	4.73679	-0.195304	-0.051	5.07509	0.019583	NA	5.04556	-0.0896107	NA	4.92331	0.0344915	NA
YJL147C		4.15938	0.353487	0.056	4.5682	0.156272	NA	4.6026	0.109507	NA	4.76524	0.116932	NA	4.53618	0.218248	0.075	4.55658	0.0992639	NA	4.34873	0.141717	NA
YJL148W	RPA34	6.3952	-0.349262	-0.185	6.29739	0.0423951	NA	6.83052	-0.0492156	NA	6.57299	-0.0135186	NA	6.62936	-0.0363627	NA	6.47774	0.131203	0.036	6.38019	-0.235851	-0.062
YJL151C	SNA3	7.50857	0.0585211	0.006	7.91951	0.0269796	0.005	8.50824	-0.0025102	NA	8.1679	0.0286443	0.011	8.00949	0.0130871	0.001	8.30464	-0.00237586	NA	7.84656	0.101577	0.038
YJL154C	VPS35	6.46112	0.258932	0.068	7.31099	0.189805	0.098	7.53858	0.0584482	NA	7.15063	0.323728	0.207	7.31997	0.220551	0.149	7.42068	0.258679	0.169	6.95343	0.184934	0.042
YJL155C	FBP26	5.92628	0.314642	0.137	6.6718	0.170256	0.099	6.15354	0.0224158	NA	6.34833	0.13171	0.067	6.41647	0.118738	0.073	6.31799	0.0684777	0.025	5.83101	0.114724	NA
YJL158C	CIS3	9.2554	0.204416	0.082	9.27269	0.0927789	0.013	10.2194	0.0354817	NA	10.2591	0.392353	0.293	10.2945	0.275033	0.204	10.205	-0.0541564	-0.001	9.76812	0.0553506	NA
YJL162C	JJJ2	4.65971	0.162135	NA	4.83744	0.180554	0.062	4.34789	0.0309107	NA	4.66077	-0.0738596	NA	4.65776	0.164526	0.063	4.62427	0.0517823	NA	4.6772	0.0255172	NA
YJL163C		2.51995	0.526042	0.163	3.93228	0.0692166	NA	4.37723	-0.0257015	NA	4.26172	0.483893	0.261	4.43876	0.204884	0.069	4.38176	0.413362	0.201	3.89425	0.170629	NA
YJL164C	TPK1	4.74565	0.336866	0.049	5.50682	0.266579	0.119	5.89648	-0.0419438	NA	6.10567	-0.0629165	NA	6.0594	0.0824665	0.011	5.96731	0.147715	0.045	5.25867	0.0752936	NA
YJL165C	HAL5	6.40969	0.488079	0.338	6.1704	0.514431	0.39	5.4859	0.0871165	NA	5.73139	0.298873	0.183	5.49837	0.316379	0.211	5.90241	0.117439	0.051	6.31686	0.102126	0.013
YJL166W	QCR8	8.22759	0.299477	0.21	7.63183	0.212921	0.142	7.37753	0.0500062	0.004	7.39012	0.14345	0.087	7.5797	0.103497	0.072	7.67454	0.0455112	0.022	7.85494	0.0430504	0
YJL167W	ERG20	10.0424	0.0956732	0.067	10.0678	0.0440443	0.031	9.85168	0.00708723	0.001	9.94499	0.0115844	0.006	9.91534	0.0482851	0.038	10.1521	0.00284258	0.001	10.0894	0.00480177	NA
YJL168C	SET2	3.79693	-0.31201	NA	4.89143	0.18645	0.077	5.08086	-0.0227802	NA	5.01855	0.0721949	NA	4.98022	0.113992	0.03	4.81089	-0.103882	NA	4.33692	-0.117211	NA
YJL171C		8.02974	0.00849805	NA	8.09262	0.0352028	0.013	8.0664	0.0164197	NA	8.04228	-0.0372432	NA	8.05625	0.00555143	NA	8.28354	-0.00346905	NA	8.49842	-0.0153544	NA
YJL172W	CPS1	6.73556	0.190201	0.078	6.69886	0.182651	0.094	6.86908	0.028674	NA	7.25535	0.0301886	NA	7.10233	0.109576	0.05	7.04219	-0.19046	-0.09	7.07952	0.126514	0.018
YJL173C	RFA3	6.89257	0.277418	0.13	6.84132	0.291388	0.175	6.96766	0.0356069	NA	6.70933	0.470593	0.335	6.76153	0.343726	0.242	7.16109	0.280572	0.187	7.39689	0.122753	0.036
YJL174W	KRE9	8.69359	0.468673	0.358	8.93484	0.428058	0.331	8.58421	0.038811	NA	8.71164	0.295048	0.19	8.72591	0.278276	0.2	8.73207	0.129729	0.063	8.43194	0.174675	0.055
YJL176C	SWI3	5.40481	0.537201	0.344	5.34227	0.295643	0.149	4.71077	-0.0217578	NA	4.87595	-0.243762	-0.091	4.77753	0.064481	NA	4.87811	-0.0957068	NA	4.72904	0.179075	0.009
YJL177W	RPL17B	9.50509	0.226006	0.136	9.49099	0.217801	0.157	10.4093	-0.000409786	NA	10.2244	0.269622	0.204	10.2607	0.189422	0.151	9.8424	0.254282	0.201	9.58643	0.199478	0.114
YJL178C	ATG27	6.32875	0.162819	0.025	6.46287	0.04916	NA	6.12694	-0.150722	0	6.42606	-0.0621053	NA	6.1664	-0.0439384	NA	6.35212	0.104123	0.036	6.09306	-0.122717	NA
YJL183W	MNN11	6.2077	0.00400823	NA	6.74455	0.0104603	NA	7.13462	4.65504e-05	NA	6.99843	0.020173	NA	6.94488	0.00842603	NA	6.69904	0.00574901	NA	6.72346	0.0346503	NA
YJL184W	GON7	6.75687	-0.000558241	NA	7.20019	0.00893417	NA	8.00085	-0.00459487	NA	7.41635	0.0104089	NA	7.62479	0.00291105	NA	7.33845	-0.00291945	NA	6.98575	0.00136469	NA
YJL187C	SWE1	4.6964	0.399688	0.122	4.78521	0.427623	0.233	5.38624	0.00667307	NA	5.78354	0.19003	0.068	5.20306	0.164154	0.054	5.4082	0.264624	0.116	4.88578	0.188673	NA
YJL189W	RPL39	8.17217	0.297885	0.201	7.93436	0.13226	0.083	8.17503	0.0045391	NA	8.16586	0.081795	0.051	8.18602	0.10284	0.076	8.50761	0.00550715	NA	8.94794	-0.00285817	NA
YJL190C	RPS22A	10.4612	0.05583	0.033	10.04	0.0171414	0.008	10.9572	0.000747386	NA	10.638	0.036396	0.024	10.8079	0.0132848	0.009	10.5498	0.00288114	0	10.2798	0.0137416	0.003
YJL191W	RPS14B	8.95451	0.133849	0.065	9.38121	0.0508889	0.025	10.2815	-0.000459563	NA	10.1073	0.0354728	0.018	10.1784	0.0249396	0.014	9.95778	0.0310782	0.017	8.97325	0.0763247	0.024
YJL193W		5.96537	0.0637828	NA	5.79919	0.0777909	0.026	5.45606	0.0267108	NA	5.06811	-0.0202955	NA	5.4643	0.0756921	0.03	5.5502	0.0445123	NA	5.7894	0.0903364	0.021
YJL194W	CDC6	3.1819	0.0336928	NA	4.40961	0.0461791	NA	3.96377	0.00840739	NA	4.25047	0.0833564	NA	3.71246	0.251784	0.103	4.15649	0.014823	NA	3.28398	0.165825	NA
YJL196C	ELO1	5.93833	0.190511	0.062	5.86778	0.0106919	NA	5.86238	0.0289164	NA	6.8639	-0.0244617	NA	6.18376	0.13664	0.089	6.03367	0.020753	NA	6.16056	0.00482338	NA
YJL197W	UBP12	4.99548	0.281256	0.079	4.9518	0.2281	0.087	5.1143	0.0478607	NA	5.20437	0.189627	0.083	5.11424	0.251875	0.147	5.0752	0.0370184	NA	4.9236	0.249988	0.052
YJL200C	ACO2	7.67841	0.203079	0.116	7.71885	0.15101	0.097	7.6287	0.0150339	NA	7.53089	0.246541	0.17	7.87552	0.0892651	0.065	8.18052	0.0239129	0.011	7.53047	0.0228308	NA
YJL201W	ECM25	6.78439	0.72698	0.589	6.71485	0.604902	0.476	6.65281	0.142528	NA	6.84075	0.3938	0.266	6.73463	0.429291	0.315	6.99369	0.37947	0.256	6.72748	0.443793	0.263
YJL206C		3.26267	0.609741	0.261	4.07802	0.469145	0.26	3.59944	0.123192	NA	3.91097	0.162542	0.011	3.86869	0.2825	0.13	3.84631	0.230245	0.07	3.55825	0.211875	NA
YJL208C	NUC1	5.47869	-0.076227	-0.011	5.61194	-0.0241527	NA	6.06528	0.011546	NA	5.98828	0.0409516	NA	5.86833	0.0522468	NA	6.1321	0.0265281	NA	5.66437	0.0856557	NA
YJL212C	OPT1	3.76724	-0.130907	NA	4.2746	-0.0785386	NA	4.49637	-0.00938106	NA	4.78769	-0.00896939	NA	4.49733	0.27496	0.116	4.3889	-0.1392	NA	4.09315	0.179939	NA
YJL213W		4.08567	-0.105299	NA	4.90514	0.129552	NA	4.99611	0.0674588	NA	4.43887	0.17063	NA	4.77682	0.352387	0.203	5.06834	0.187624	0.047	4.3151	0.195156	NA
YJL216C	IMA5	3.71945	0.138071	NA	3.93246	0.288959	0.081	3.56219	0.00788143	NA	3.78236	0.196188	0.005	3.86015	0.155759	0.013	3.66616	-0.0212114	NA	3.26146	0.0697238	NA
YJL217W	REE1	7.61947	0.0782072	0.02	7.58719	0.0555231	0.023	7.92685	0.0197614	0.001	7.90184	0.109242	0.072	8.31477	0.0895413	0.069	8.10907	0.0139294	0.004	7.98698	0.0150317	NA
YJL221C	IMA4	2.06257	0.323659	NA	2.15607	0.165118	NA	1.09855	-0.0795496	NA	1.37426	0.287266	NA	1.17636	0.269862	NA	1.23845	-0.107151	NA	NA	NA	NA
YJR001W	AVT1	6.14322	0.102093	NA	6.42869	0.0392609	NA	6.73038	-0.00871627	NA	6.50216	0.0655265	NA	6.70334	0.171311	0.101	6.57864	-0.0246094	NA	6.04647	0.13135	NA
YJR002W	MPP10	5.32851	-0.0012289	NA	5.56535	0.0697977	NA	5.56272	0.00715055	NA	5.73311	-0.275437	-0.138	5.5856	0.106666	0.035	5.65185	-0.0723912	NA	5.30814	0.134388	NA
YJR003C		5.08997	0.0815562	NA	5.42812	0.06836	NA	5.74777	0.0100483	NA	5.28269	0.114908	0.025	5.67209	0.120045	0.059	5.70331	0.00796492	NA	5.49442	0.0327302	NA
YJR004C	SAG1	2.49986	0.451812	0.012	3.70861	0.394986	0.17	3.1222	-0.0781131	NA	3.50203	-0.0243273	NA	3.07061	0.276424	0.072	3.14746	-0.0475961	NA	2.99251	-0.0140531	NA
YJR005W	APL1	5.45	-0.0539003	NA	6.04285	0.111726	NA	5.73235	0.0194789	NA	5.44326	0.224469	0.076	5.63627	0.162251	0.062	5.90109	0.0341217	NA	5.32633	0.0247882	NA
YJR006W	POL31	5.43982	0.349195	0.109	5.90605	0.303528	0.169	6.21394	0.0277609	NA	6.26853	0.208023	0.107	6.14478	0.150267	0.079	6.4637	0.0962977	0.036	5.93343	0.176682	0.016
YJR008W	MHO1	4.91127	0.300745	0.066	5.41883	0.144447	NA	4.83661	0.0440922	NA	4.65411	0.142536	NA	5.0286	0.130847	0.021	5.02108	0.00550881	NA	4.80725	0.127246	NA
YJR009C	TDH2	12.6336	0.0892035	0.066	12.0753	0.0624309	0.035	11.9197	-0.012902	NA	12.2478	0.0438339	0.012	12.2553	0.0451666	0.021	12.8543	0.0665556	0.045	12.3322	0.0704033	0.039
YJR010C-A	SPC1	4.18902	0.0499576	NA	5.1882	0.0900218	0.003	5.72927	0.0365256	NA	5.38127	0.00220563	NA	5.6414	0.055279	NA	5.35057	-0.0071072	NA	5.16233	0.0376718	NA
YJR011C		4.21441	0.0145657	NA	5.08681	-0.0183371	NA	5.4466	-0.0228703	NA	5.18322	-0.0546902	NA	5.45349	0.0550111	NA	5.33566	-0.00486893	NA	4.81447	0.316809	0.055
YJR014W	TMA22	6.61133	-0.0809826	NA	6.8305	0.00344969	NA	7.86878	0.0361478	NA	7.2374	0.116499	0.019	7.5482	0.0184702	NA	7.43973	-0.110433	-0.032	7.30996	-0.199267	-0.045
YJR015W		6.84457	0.0176695	NA	6.69928	0.0196427	NA	7.00395	-0.0168081	NA	7.09659	-0.00590068	NA	7.08194	0.0643624	0.02	6.99705	0.00318369	NA	6.96489	0.0408955	NA
YJR016C	ILV3	6.869	0.0162354	NA	6.84009	0.0159433	NA	6.61891	-0.015069	NA	6.62065	-0.00903507	NA	6.58585	-0.0359012	NA	6.74318	0.0315543	NA	6.41644	-0.0284585	NA
YJR017C	ESS1	5.58916	0.11715	0.035	5.84152	-0.0229737	NA	6.65553	-0.0755868	NA	6.35219	0.01544	NA	6.33431	-0.0386832	NA	6.48575	0.0606213	NA	5.58793	-0.203206	NA
YJR018W		2.55939	0.034319	NA	2.12605	-0.041426	NA	1.47461	-0.19586	NA	1.28264	-0.0912652	NA	1.40428	0.0315373	NA	1.80163	-0.0797402	NA	2.60168	-0.190557	NA
YJR025C	BNA1	4.88659	0.293978	NA	5.08593	0.311261	0.116	5.91748	0.068529	NA	5.5546	0.108544	NA	5.99621	0.181887	0.086	5.84752	0.355799	0.206	5.85837	0.0746029	NA
YJR029W		5.47795	0.0234708	NA	4.57069	-0.0014047	NA	3.95921	0.0547846	NA	4.22775	0.652114	0.48	4.22383	0.242691	0.138	4.12574	0.0430519	NA	5.48778	0.210278	0.099
YJR031C	GEA1	4.58573	-0.00810183	NA	4.9856	-0.0531256	NA	5.9758	0.0327012	NA	5.82063	-0.0199786	NA	5.65615	0.112879	0.043	5.65693	0.0552303	NA	4.98335	0.265949	NA
YJR032W	CPR7	4.95087	-0.0404779	NA	4.98595	-0.00664119	NA	5.19605	-0.00851806	NA	5.04818	0.0371122	NA	5.01755	0.0136132	NA	5.29238	-0.00730763	NA	5.14636	-0.0404858	NA
YJR033C	RAV1	4.57928	0.114409	NA	4.89268	0.0942623	NA	4.5032	0.0784454	NA	4.71524	-0.0106557	NA	4.73195	0.144088	0.037	4.73269	0.12455	NA	4.42606	0.245022	NA
YJR034W	PET191	4.66426	0.619516	0.397	4.62392	0.340153	0.112	5.62767	0.0227296	NA	5.27691	0.224668	0.075	5.29298	0.194191	0.08	5.1584	0.211629	0.055	4.51649	0.386051	0.073
YJR036C	HUL4	3.64086	0.0917602	NA	3.89123	0.24311	0.062	4.15693	-0.00866225	NA	3.67972	0.139877	NA	4.21701	0.223273	0.106	4.08147	0.0034088	NA	3.47093	-0.000578398	NA
YJR040W	GEF1	5.8294	0.174589	0.029	6.1557	0.0686793	0.015	6.0368	0.0135662	NA	6.17917	0.156974	0.086	6.02776	0.122778	0.071	6.08226	0.00966174	NA	5.76775	0.113925	NA
YJR042W	NUP85	6.15246	-0.109664	NA	6.44443	-0.122511	-0.052	5.8524	0.0199932	NA	5.61267	-0.0108512	NA	5.96005	0.13856	0.058	6.03489	-0.0518228	NA	6.12375	-0.0558574	NA
YJR045C	SSC1	10.7067	0.053561	0.033	10.9318	0.060698	0.041	10.5777	0.00494639	NA	10.7688	-0.0159428	NA	10.7838	0.031555	0.016	10.5378	0.0189556	0.002	10.4506	0.0485229	0.023
YJR046W	TAH11	7.23705	0.0194139	NA	7.84587	0.0367562	0.006	7.83414	-0.00665895	NA	7.70521	-0.00727397	NA	7.78899	-0.0138453	NA	7.76356	-0.00884519	NA	7.99439	-0.119824	-0.038
YJR049C	UTR1	6.49268	-0.16305	-0.038	6.52985	-0.0981605	NA	6.87979	0.058919	NA	6.84732	-0.0484831	NA	6.84805	0.125746	0.05	6.84153	0.0503362	NA	7.14112	-0.164496	-0.058
YJR051W	OSM1	5.74535	0.000532395	NA	5.92788	0.00709951	NA	6.54515	-0.010319	NA	6.01193	0.235348	0.128	6.13806	0.0181894	NA	6.30004	0.0533082	0.01	5.85044	0.110835	NA
YJR052W	RAD7	6.21442	0.0468377	NA	6.63909	0.0181179	NA	6.11734	-0.000964836	NA	6.23201	0.0090393	NA	6.13428	0.0477836	0.021	6.34323	0.00827552	NA	6.49785	0.00345098	NA
YJR054W	KCH1	5.28682	0.177401	NA	6.10314	0.109492	NA	6.71926	0.00659861	NA	6.69869	-0.00953138	NA	6.32419	0.228156	0.139	6.80794	-0.0114468	NA	6.03891	0.0528102	NA
YJR055W	NA	NA	NA	NA	1.44097	-0.464929	-0.079	1.12303	-0.0607068	NA	2.31439	-0.562691	-0.197	0.00639619	0.00809606	NA	1.20916	-0.0779353	NA	0.710304	-0.534699	-0.065
YJR057W	CDC8	4.00366	-0.0896244	NA	4.44972	0.0201798	NA	4.63228	0.0154819	NA	4.72276	0.0660152	NA	4.09352	0.0804398	NA	4.77947	0.0365254	NA	4.27331	0.133341	NA
YJR058C	APS2	6.76675	0.0180836	NA	7.04545	0.0492726	0.011	7.45863	0.014525	NA	6.99603	0.208603	0.13	7.2697	0.0799445	0.051	7.22256	0.0662898	0.034	7.065	0.0153591	NA
YJR059W	PTK2	6.90227	0.294541	0.176	7.0768	0.323707	0.228	6.20849	0.00965952	NA	6.38184	0.180715	0.074	6.24096	0.209125	0.12	6.66348	0.281741	0.178	6.38513	0.250822	0.109
YJR060W	CBF1	1.96469	-0.0304771	NA	2.80213	0.00901641	NA	2.5793	0.0583793	NA	3.13005	-0.110194	NA	2.16611	0.150652	NA	2.90317	0.075102	NA	1.56252	0.0461502	NA
YJR062C	NTA1	2.95706	-0.44741	-0.131	4.29128	0.121986	NA	3.71143	-0.0225446	NA	4.81094	0.0196368	NA	3.66034	0.0567089	NA	4.21775	-0.089932	NA	3.37242	-0.0992505	NA
YJR063W	RPA12	5.78871	0.159349	0.011	6.22029	0.0413531	NA	6.03954	-0.0046338	NA	6.06664	0.0345623	NA	5.93408	0.0826257	0.036	6.14372	0.0260483	NA	5.61472	0.0475975	NA
YJR064W	CCT5	8.25211	0.535542	0.415	8.23362	0.507411	0.399	6.99532	0.108919	NA	7.50911	0.465669	0.34	7.3089	0.522828	0.405	7.45556	0.0442745	NA	7.69829	0.124607	0.026
YJR065C	ARP3	8.79033	0.0868146	0.049	8.61116	0.0948372	0.062	8.36604	0.00464826	NA	8.30548	0.174151	0.12	8.4145	0.0499124	0.035	8.46187	0.0166117	0.006	8.11704	0.017246	NA
YJR067C	YAE1	3.09441	0.330178	NA	4.01602	0.0573749	NA	3.98472	0.0763385	NA	3.59188	0.268593	0.045	3.79057	-0.00866846	NA	3.85491	-0.0163672	NA	2.91512	0.0210032	NA
YJR069C	HAM1	6.84014	0.111727	NA	7.18364	0.0785656	0.036	7.46519	-0.000359218	NA	7.494	0.0606623	0.032	7.39122	0.020294	0.004	7.11769	0.0125576	NA	6.86596	0.00702295	NA
YJR072C	NPA3	6.8723	-0.0257075	NA	7.1926	0.0684461	NA	7.74134	-0.0247268	NA	7.29284	0.0934397	0.025	7.57586	0.0803807	0.033	7.3902	0.0209836	NA	7.93605	-0.0541588	NA
YJR075W	HOC1	7.74123	-0.0991351	NA	7.67303	-0.066205	NA	8.1888	-0.0171139	NA	8.09825	0.0856175	NA	8.2091	0.0759106	0.019	7.94523	-0.0231057	NA	7.53173	0.0486693	NA
YJR077C	MIR1	6.58308	0.492096	0.317	6.98286	0.394067	0.267	7.3698	0.0899032	NA	7.31469	0.375926	0.248	7.22931	0.290501	0.192	7.28568	0.207349	0.107	7.00363	0.307225	0.131
YJR082C	EAF6	6.09941	0.0680491	NA	6.40434	0.0237146	NA	6.59888	0.0022054	NA	6.40954	0.029294	NA	6.56402	0.0921155	0.05	6.52007	0.0167643	NA	6.58875	0.0167926	NA
YJR084W		4.73762	0.287393	0.061	4.96601	0.200299	0.081	4.899	0.012562	NA	4.83128	0.0127172	NA	4.9597	0.0494504	0.006	4.94774	0.0283895	NA	4.99104	0.0427409	NA
YJR088C	EMC2	8.03867	0.134649	0.048	8.15631	0.134432	0.069	7.74025	-0.018394	NA	7.76931	-0.072896	NA	7.81473	0.0943337	0.043	7.90538	0.0926918	0.033	7.37405	0.060516	NA
YJR089W	BIR1	4.60053	0.640468	0.362	4.90355	0.409915	0.227	5.17906	0.0313095	NA	5.02811	0.244442	0.102	5.12132	0.216091	0.107	5.23361	0.139463	0.036	4.83323	0.222213	NA
YJR090C	GRR1	5.04783	0.27678	0.021	5.42678	0.297823	0.163	5.60153	-0.00242796	NA	5.39954	0.337397	0.196	5.54976	0.253699	0.155	5.68571	0.154026	0.074	5.19497	0.29677	0.079
YJR094W-A	RPL43B	9.07426	0.0163816	NA	9.34816	0.0039154	NA	10.0697	-0.000230068	NA	9.66925	0.0224419	0.012	9.9873	0.00670554	0.003	9.77874	-0.000764077	NA	8.94122	0.00422181	NA
YJR095W	SFC1	3.13088	0.256794	NA	3.30101	0.12637	NA	3.59145	0.0537596	NA	3.84034	-0.0799817	NA	3.94532	0.0973326	NA	3.24924	0.246534	NA	3.06265	-0.167538	NA
YJR097W	NA	NA	NA	NA	5.03704	0.00439905	NA	4.52632	-0.00795764	NA	4.45412	0.00282218	NA	4.36942	0.047484	NA	NA	NA	NA	NA	NA	NA
YJR098C		4.39601	0.402779	0.168	4.40165	0.269944	0.092	4.02909	0.0672373	NA	3.76661	-0.153936	NA	4.27541	0.216124	0.075	4.23274	0.0865588	NA	3.63006	0.132693	NA
YJR099W	YUH1	4.92786	0.14768	NA	6.03155	0.109818	0.015	6.82101	-0.00762444	NA	6.50641	0.131974	0.057	6.78799	0.0681597	0.028	6.26053	0.239392	0.136	6.01019	0.120752	NA
YJR101W	RSM26	6.64789	0.054176	0.017	7.11335	0.0487276	0.02	6.73411	0.0263028	NA	6.70841	0.0114985	NA	6.91342	0.0285562	NA	6.8652	0.034696	0.004	6.60196	0.0353216	NA
YJR102C	VPS25	4.10246	0.258224	NA	4.63353	0.19986	0.033	4.75064	0.0735578	NA	4.63268	0.183657	0.037	4.91028	0.182429	0.078	4.99419	0.0705903	NA	4.55906	0.0216601	NA
YJR104C	SOD1	11.8207	0.00695974	0.003	11.9392	0.000410304	NA	11.6202	-4.30327e-06	NA	11.7832	0.00106908	0	11.7948	0.000845709	0	12.0502	-0.000346882	NA	12.4323	1.94636e-05	NA
YJR106W	ECM27	1.43555	-0.20032	NA	2.61913	-0.201799	NA	2.78251	0.0651439	NA	3.57107	-0.0225817	NA	1.76739	0.129173	NA	3.06075	-0.11189	NA	2.21126	0.116088	NA
YJR109C	CPA2	5.6996	0.129584	NA	6.10938	0.0956491	0.033	5.52648	0.0464249	NA	5.49804	0.146512	0.062	5.63566	0.215854	0.138	5.68212	0.00282733	NA	5.0313	0.0760543	NA
YJR112W-A		5.97895	0.317917	0.139	5.84095	0.0269977	NA	6.49338	0.00277312	NA	6.28712	0.00470561	NA	6.1837	0.0168447	NA	6.17003	0.0130205	NA	6.4023	0.0479811	NA
YJR114W		2.98284	0.252395	NA	3.22146	0.388829	0.17	3.17144	-0.0250664	NA	3.06176	0.26762	0.031	2.96029	0.205497	NA	2.71294	0.313306	0.051	2.39638	0.312552	NA
YJR115W		3.98761	0.111708	NA	4.81523	0.0804671	NA	4.25202	0.0165149	NA	4.06972	0.0454066	NA	4.27293	0.0168966	NA	4.276	0.0795949	NA	3.45898	-0.0419042	NA
YJR118C	ILM1	6.21786	0.00976522	NA	6.33705	-0.00971836	NA	7.1495	0.00667292	NA	6.01332	-0.0852745	-0.011	6.82605	-0.0142438	NA	7.40021	0.00458219	NA	7.30639	0.0150891	NA
YJR119C	JHD2	4.72772	0.104446	NA	5.34536	0.108614	0.015	5.40822	0.0126283	NA	4.93945	0.0489929	NA	5.33606	0.053239	NA	5.41059	0.0298311	NA	4.88493	0.156736	NA
YJR121W	ATP2	10.0811	0.13938	0.073	10.1965	0.111369	0.046	10.2003	0.0864685	NA	10.54	0.173041	0.099	10.6501	0.187603	0.136	10.1061	0.0628543	0.012	9.92133	0.149176	0.068
YJR122W	IBA57	6.07843	0.300451	0.169	6.25074	0.263446	0.18	5.50915	0.0075006	NA	6.27483	0.0588102	0.029	5.67269	0.0948953	0.054	NA	NA	NA	NA	NA	NA
YJR123W	RPS5	9.9999	0.115195	0.075	9.7229	0.110831	0.073	9.96885	0.00823458	NA	9.90239	0.2153	0.153	9.98691	0.151559	0.118	9.9868	0.046436	0.03	9.6112	0.0457967	0.013
YJR124C		4.38413	0.520586	0.284	4.70758	0.321416	0.135	4.75141	0.0192145	NA	4.68302	0.125514	NA	4.60096	0.204478	0.063	4.45884	0.10165	NA	4.07341	0.207111	NA
YJR127C	RSF2	5.06153	0.450705	0.17	5.65354	0.0964896	0.017	5.61847	0.00801787	NA	5.74534	0.0805122	0.019	5.73495	0.11415	0.058	5.47037	0.0279833	NA	5.80383	0.114156	NA
YJR130C	STR2	4.85126	-0.0515989	NA	5.33839	0.108205	NA	5.26445	-0.00813925	NA	5.40782	-0.102875	NA	5.33641	0.0790749	NA	5.47585	0.119561	0.022	5.09664	0.0925174	NA
YJR131W	MNS1	3.90121	-0.167797	NA	4.85095	-0.00836536	NA	5.6726	0.00498462	NA	5.9675	-0.0171953	NA	5.31648	0.118112	0.009	5.62724	0.0035215	NA	4.79035	0.0386073	NA
YJR132W	NMD5	4.69725	0.282512	NA	5.16685	0.220976	0.056	6.05395	0.0408145	NA	6.26408	0.246587	0.128	5.80703	0.204721	0.103	5.92498	0.25075	0.129	5.7083	0.301871	0.093
YJR134C	SGM1	5.4191	0.411353	0.194	5.62896	0.334009	0.205	5.72309	0.0388952	NA	5.6676	0.306132	0.193	5.88773	0.14861	0.096	6.09728	0.0961566	0.052	5.72632	0.0125755	NA
YJR135W-A	TIM8	5.27238	0.210089	NA	5.35874	0.234363	0.064	6.04615	0.0135673	NA	5.84274	0.304544	0.164	5.8761	0.0887782	0.01	5.72096	0.00246237	NA	5.61287	0.121854	NA
YJR137C	MET5	5.60042	0.454898	0.281	5.70827	0.103296	0.042	4.93599	0.04985	NA	5.12098	0.047349	NA	4.96284	0.163723	0.087	5.07817	0.0192045	NA	5.624	0.0212696	NA
YJR139C	HOM6	9.516	0.0197966	0.004	9.63282	0.0123292	0.004	9.7163	0.00176263	NA	9.92085	0.012468	0.005	9.68198	0.0232842	0.015	9.60593	0.00366545	NA	9.71834	0.00308088	NA
YJR142W		5.70594	0.273172	0.091	5.81759	0.0636607	NA	5.9978	0.0197841	NA	6.2215	0.0175671	NA	6.08167	0.0727331	0.028	6.33483	0.0139024	NA	6.09992	0.0287836	NA
YJR143C	PMT4	7.44578	0.0425705	NA	7.27511	0.0567405	0.013	7.77997	0.016795	NA	7.90163	0.030949	0.007	7.97356	0.0805083	0.053	8.20262	-0.0143143	-0.002	8.15032	0.0086202	NA
YJR144W	MGM101	6.37841	0.460231	0.279	6.40686	0.316897	0.202	6.49221	0.0136635	NA	6.61621	0.304185	0.202	6.3753	0.068697	0.028	6.71648	0.10384	0.051	6.16832	0.3149	0.13
YJR145C	RPS4A	9.7757	0.220762	0.15	9.4505	0.105484	0.067	10.2484	-0.00297658	NA	9.87988	0.312015	0.232	10.0609	0.132303	0.101	9.92694	0.0144372	0.002	9.53798	0.136955	0.076
YJR147W	HMS2	3.67989	0.300112	0.085	3.96727	0.232029	0.03	4.76661	0.0733618	NA	4.80669	0.0755168	NA	3.87582	0.132116	NA	4.17751	0.214671	0.043	4.63148	0.22144	NA
YJR148W	BAT2	6.5753	0.0464073	NA	6.4554	0.146059	0.041	7.66216	-0.0104896	NA	6.79433	0.117508	0.045	7.30009	0.000542717	NA	7.31658	0.033494	NA	6.90025	0.0623535	NA
YJR149W		5.44154	0.451084	0.269	5.57392	0.441712	0.303	4.71739	0.110089	NA	5.62741	0.242102	0.105	5.12193	0.232268	0.111	4.96014	0.0755572	NA	4.36096	0.41205	0.137
YJR151C	DAN4	2.31519	0.191998	NA	2.42776	0.390522	0.073	2.86706	0.357745	0.009	2.79247	0.371724	0.099	2.29214	0.324249	0.06	3.11885	0.375113	0.105	2.20672	0.332068	NA
YJR155W	AAD10	5.18457	0.0947621	NA	5.81615	0.083442	NA	5.0944	0.0170913	NA	5.56414	0.241016	0.099	5.23574	0.164577	0.052	5.17603	-0.0385675	NA	5.33331	0.341836	0.114
YKL002W	DID4	7.36118	0.120602	0.058	7.24538	0.0648776	0.01	6.88683	-0.00757566	NA	7.0505	-0.215714	-0.116	6.87399	0.104819	0.063	7.0053	0.0492661	NA	7.11945	0.0155319	NA
YKL003C	MRP17	7.02903	0.500677	0.333	7.42851	0.288379	0.198	7.5023	0.0367313	NA	7.28829	0.25882	0.171	7.45779	0.179438	0.129	7.45198	0.0797313	0.04	7.29246	0.104769	0.025
YKL004W	AUR1	7.0097	0.364355	0.248	7.04411	0.296352	0.208	6.95452	0.0222716	NA	6.63966	-0.0223542	NA	6.90225	0.209858	0.134	6.82527	0.204578	0.119	7.04117	0.254364	0.136
YKL005C	BYE1	7.21594	0.25572	0.12	7.55946	0.183518	0.109	7.77225	0.00459775	NA	7.43305	-0.156678	-0.077	7.74302	0.0269459	NA	7.42753	0.0102846	NA	7.26752	0.0354215	NA
YKL006C-A	SFT1	7.19209	0.338738	0.188	6.79152	0.244101	0.128	7.11885	0.0807326	NA	6.55564	0.17714	0.071	7.14271	0.180501	0.11	6.96006	0.312824	0.201	7.03508	0.397543	0.231
YKL006W	RPL14A	9.4923	0.0498697	0.02	9.31865	0.00537699	NA	9.61517	0.00126574	NA	9.21408	0.0225778	0.009	9.56852	0.0204586	0.012	9.68929	-0.00426573	NA	9.17318	0.0165092	NA
YKL008C	LAC1	5.45597	0.0250193	NA	5.39186	0.156937	NA	6.39197	-0.111192	NA	6.30689	0.104398	NA	6.45742	0.137874	0.05	6.34541	-0.0332651	NA	5.54086	0.127112	NA
YKL009W	MRT4	6.47127	0.209798	0.079	6.99401	0.0790875	0.032	6.86032	-0.0100616	NA	6.99758	0.00809986	NA	6.70884	0.079215	0.045	6.9264	-0.0106278	NA	6.80406	-0.0105403	NA
YKL011C	CCE1	5.75659	0.0191827	NA	6.14681	0.12688	0.047	6.33458	0.0209502	NA	6.67652	0.206663	0.131	6.39596	0.127205	0.077	6.21887	0.018718	NA	5.85208	0.223496	0.056
YKL012W	PRP40	4.42498	0.434058	0.116	4.75178	0.133953	NA	5.00338	0.0604432	NA	5.1881	0.050411	NA	4.98316	0.270338	0.144	5.14477	0.110751	NA	4.69004	0.321887	0.058
YKL013C	ARC19	8.42941	0.0522438	0.019	8.47897	0.0467586	0.025	7.82881	0.00856642	NA	8.00155	0.114903	0.074	7.83558	0.0986076	0.07	8.21667	0.00250203	NA	7.93078	0.0135126	NA
YKL014C	URB1	4.39313	0.312402	0.056	4.97586	0.106853	0.021	5.22664	0.0066833	NA	5.42228	0.0257879	NA	5.05847	0.111127	0.049	4.84557	0.0272963	NA	NA	NA	NA
YKL015W	PUT3	4.89888	-0.0368049	NA	5.59944	0.144875	0.028	5.50455	0.0793922	NA	5.62683	-0.0135377	NA	5.59691	0.146493	0.062	5.68916	-0.00791707	NA	5.2871	-0.0816796	NA
YKL018C-A		5.99653	0.211644	NA	6.35878	0.00493032	NA	6.51999	-0.0440007	NA	6.01927	0.0161788	NA	6.40977	0.0847155	0.01	6.1811	0.0935787	NA	6.1405	0.0148657	NA
YKL019W	RAM2	6.31554	0.0721554	NA	NA	NA	NA	NA	NA	NA	6.21034	0.0348141	0.005	6.63939	0.0183453	0.005	6.72109	0.00703777	NA	NA	NA	NA
YKL022C	CDC16	4.0751	-0.0265808	NA	4.55351	-0.0243334	NA	4.93256	-0.0211525	NA	4.53006	0.0281521	NA	4.52247	0.010633	NA	4.76542	0.0413292	NA	4.9392	-0.0013693	NA
YKL023W		5.04138	-0.0177765	NA	5.60437	-0.0203756	NA	5.71639	0.0114537	NA	5.8013	-0.0317358	NA	5.29354	-0.0155515	NA	5.60488	-0.0117482	NA	5.03205	-0.0728494	NA
YKL025C	PAN3	6.26607	0.0719342	NA	6.77583	0.025591	NA	6.68979	0.0088625	NA	6.02334	0.214178	0.11	6.80926	0.0431363	0.015	6.6734	0.00416932	NA	6.17879	0.0613622	NA
YKL026C	GPX1	5.1364	0.581317	0.321	5.8014	0.336304	0.203	5.32175	0.0160996	NA	5.69217	0.0552682	NA	5.75883	0.16723	0.087	5.32664	0.116106	0.018	5.47313	0.00768236	NA
YKL028W	TFA1	6.02789	-0.0547991	NA	6.05544	-0.0366149	NA	5.79701	-0.0327392	NA	6.13909	-0.273305	-0.151	5.77908	0.0042096	NA	6.01562	-0.0393141	NA	5.89908	-0.332197	-0.129
YKL029C	MAE1	7.27829	0.29031	0.144	7.05857	0.289964	0.174	7.29274	0.0181712	NA	7.39551	-0.0304197	NA	7.14902	0.0501067	NA	7.49941	0.0825524	0.023	7.83391	0.00579275	NA
YKL032C	IXR1	5.46129	-0.0793993	-0.028	5.7789	0.000113253	NA	5.97604	-0.0152847	NA	5.91058	-0.0452087	NA	5.95202	0.00491482	NA	5.90265	-0.0627956	-0.018	5.18239	0.110751	NA
YKL033W	TTI1	2.47865	-0.0873541	NA	2.84632	-0.116872	NA	3.15121	0.0729678	NA	2.43878	-0.157374	NA	3.00801	-0.0628343	NA	3.0676	-0.0923056	NA	2.41741	-0.334177	NA
YKL033W-A		6.17316	0.242449	0.099	6.21044	0.216119	0.117	6.26561	0.038359	NA	6.08349	0.265039	0.157	6.23166	0.220113	0.147	6.25535	-0.00373878	NA	5.69148	0.0927049	NA
YKL035W	UGP1	9.10227	0.0539555	0.028	8.92131	0.0327256	0.019	8.63597	0.0127176	0.001	9.16905	0.0905498	0.063	9.04764	0.117424	0.093	8.89253	0.0307398	0.02	8.87873	0.0216868	0.005
YKL039W	PTM1	7.59332	0.311363	0.189	7.48514	0.340591	0.24	6.88976	-0.0530149	NA	7.11484	0.0278381	NA	7.06936	0.280222	0.192	6.94928	0.0908675	NA	6.97433	0.0979857	NA
YKL041W	VPS24	4.58861	-0.149917	NA	4.92767	-0.0373034	NA	5.69801	-0.0374335	NA	5.51329	0.150225	0.024	5.51722	0.0136518	NA	5.47824	0.0810727	NA	4.85156	-0.055127	NA
YKL045W	PRI2	7.20839	-0.00088134	NA	7.29039	0.00511681	NA	7.17517	0.00019128	NA	7.34572	0.0183643	0.003	7.19816	0.022401	0.008	7.53036	0.00796898	NA	7.98593	-0.00216608	NA
YKL046C	DCW1	8.0933	0.0374241	0.003	8.44329	0.0105972	NA	8.22515	0.00474678	NA	7.82039	0.0166557	NA	8.21499	0.0287697	0.017	7.99137	0.0173184	0.005	8.31027	0.00170013	NA
YKL047W	ANR2	5.76936	0.474294	0.219	6.32028	0.409294	0.272	6.64296	0.0396969	NA	5.80422	0.373508	0.21	6.54468	0.182845	0.111	6.38999	0.153353	0.071	6.02068	0.242815	0.048
YKL049C	NA	NA	NA	NA	NA	NA	NA	4.8721	0.00190756	NA	4.82157	0.00771008	NA	4.35378	0.0138182	NA	4.99531	0.0394676	NA	4.41575	0.0408743	NA
YKL050C	NA	NA	NA	NA	4.45812	0.00241037	NA	3.79541	-0.00401445	NA	3.94135	-0.111308	NA	4.05861	-0.0167135	NA	4.02177	-0.0258856	NA	NA	NA	NA
YKL051W	SFK1	3.13416	0.282645	NA	3.93822	-0.447564	-0.213	4.06675	-0.0993201	NA	4.49207	-0.240231	-0.059	3.73098	0.0656227	NA	4.04592	-0.0016345	NA	3.6349	-0.0755183	NA
YKL052C	ASK1	6.78544	0.368973	0.21	7.47493	0.196906	0.131	7.23087	0.0281756	NA	7.32474	0.0296541	0.004	7.20201	0.177463	0.129	7.22262	0.0623179	0.032	7.13083	0.0633295	0.002
YKL053C-A	MDM35	8.21424	0.0415673	0.011	8.21983	0.0145154	0	8.22348	0.00137145	NA	7.99163	0.033135	0.015	8.3221	0.00912415	0.002	8.37948	0.00203964	NA	8.96569	-0.00138943	NA
YKL054C	DEF1	7.35734	-0.00570005	NA	7.93695	0.00671268	NA	7.4947	-0.00329326	NA	7.82022	-0.00189634	NA	7.58638	0.00503653	NA	7.71206	-0.00074908	NA	7.73602	0.0114923	NA
YKL055C	OAR1	1.82157	-0.267033	NA	1.86715	-0.0952423	NA	0.792463	-0.227163	NA	2.15403	-0.164442	NA	0.804094	0.0463007	NA	1.2735	-0.165513	NA	0.617902	-0.145352	NA
YKL056C	TMA19	10.5551	0.22027	0.126	10.5502	0.34561	0.267	11.1469	-0.0192776	NA	10.9042	0.116212	0.036	11.0689	0.142376	0.086	10.826	0.0828637	0.032	10.4645	-0.0304448	NA
YKL057C	NUP120	6.46588	0.0617741	NA	6.51077	0.045289	0.007	6.0256	-0.000367779	NA	5.74759	0.0705042	0.013	6.06445	0.0905146	0.048	6.26118	7.59106e-05	NA	5.95229	0.028742	NA
YKL058W	TOA2	5.52089	0.0324908	NA	6.29809	-0.0204167	NA	6.30866	0.00773857	NA	6.12331	0.247447	0.122	6.28468	0.126146	0.054	6.23992	-0.0443012	NA	5.78441	-0.0826242	NA
YKL060C	FBA1	12.8082	0.0143039	0.009	12.6468	0.00923998	0.005	12.6789	0.00133097	NA	12.532	0.0401593	0.029	12.7469	0.0249111	0.02	12.8473	0.00431375	0.002	12.8968	0.00259963	NA
YKL061W	BLI1	4.86565	-0.0520392	NA	4.77142	0.0493145	NA	4.60745	-0.00472649	NA	4.43205	0.0178941	NA	4.30789	0.0166922	NA	4.6622	0.016652	NA	4.16679	0.0791599	NA
YKL062W	MSN4	2.91759	0.315339	0.102	3.56412	0.195607	0.013	2.7945	-0.0268873	NA	3.19629	-0.00936157	NA	2.52862	0.176011	NA	3.29714	-0.00812714	NA	2.27492	0.0396925	NA
YKL063C		6.64389	0.0541688	NA	7.19559	0.108655	0.052	7.76704	0.0154395	NA	7.43369	0.130538	0.077	7.75342	0.0616562	0.039	7.8444	0.0438845	0.022	7.35618	0.0465965	NA
YKL064W	MNR2	5.10079	0.0741503	NA	5.60973	0.300903	0.154	5.74044	-0.0207974	NA	6.01864	0.0968037	NA	5.5949	0.250275	0.135	5.45847	0.205095	0.077	5.26359	0.206077	NA
YKL065C	YET1	8.86467	0.63387	0.539	9.12275	0.622796	0.539	8.72432	0.0796107	0.019	9.12696	0.161703	0.122	8.81556	0.249269	0.205	8.96151	0.13469	0.104	8.52351	0.419314	0.308
YKL065W-A		3.93806	0.453459	0.161	4.09353	0.280545	0.085	3.22175	0.00767557	NA	4.10936	0.0407182	NA	3.43858	0.0132054	NA	3.04536	0.0649922	NA	3.46828	0.40019	0.038
YKL068W-A		5.98558	0.509208	0.301	6.28907	0.428251	0.287	6.75932	0.0711892	NA	6.72063	0.135031	0.032	6.32294	0.320427	0.207	6.4269	0.302669	0.171	6.37498	0.463926	0.271
YKL069W		4.87571	-0.109253	NA	4.88643	-0.0789915	NA	6.51135	-0.0529689	NA	5.4918	0.134832	NA	5.96802	-0.0125662	NA	5.69516	0.0402778	NA	5.35135	0.265154	NA
YKL071W		2.89526	0.0524583	NA	3.0402	-0.0900488	NA	3.66828	-0.0513892	NA	3.49149	-0.0492852	NA	3.43905	0.0757551	NA	2.94828	0.0644719	NA	2.27944	0.183877	NA
YKL073W	LHS1	5.88115	0.48819	0.283	5.69142	0.21189	0.096	6.21978	0.0359343	NA	5.96585	0.0278404	NA	5.92124	0.0772044	0.037	6.4979	0.00370239	NA	5.36972	0.0120031	NA
YKL076C	PSY1	4.08471	0.0795854	NA	4.5919	0.193803	0.01	4.66263	0.0809624	NA	4.54798	0.285902	0.1	4.64041	0.117689	NA	4.78754	0.0743433	NA	3.8788	0.0932816	NA
YKL077W		6.85719	0.324265	0.157	7.06045	0.306522	0.197	7.31016	0.124426	NA	7.39742	0.287824	0.18	7.35225	0.317638	0.225	7.11186	0.170582	0.079	6.8573	0.257582	0.091
YKL079W	SMY1	4.83728	0.0379357	NA	5.4512	0.0454869	NA	5.17576	0.000712852	NA	4.50587	0.0713342	NA	5.1556	0.0476031	NA	4.95757	-0.0410766	NA	4.41451	0.00216346	NA
YKL081W	TEF4	9.30988	0.0526882	NA	9.29516	-0.00198971	NA	9.65028	-0.124615	NA	9.63952	-0.0308738	NA	9.58237	-0.10447	-0.038	9.23257	0.13782	0.031	10.0591	-0.283348	-0.177
YKL082C	RRP14	4.82869	0.0561706	NA	4.86102	0.0212503	NA	4.96562	-0.00154451	NA	5.18953	0.0335055	NA	4.74568	0.144567	0.067	4.86162	0.0470336	NA	5.84897	0.000572126	NA
YKL085W	MDH1	7.75962	-0.0611078	-0.026	7.93706	0.00292677	NA	8.46636	-0.0113153	NA	8.06553	0.0673784	0.019	7.99445	-0.00484349	NA	7.94405	0.0725713	0.031	8.32033	-0.0529966	-0.017
YKL087C	CYT2	6.62493	-0.0693989	NA	7.28975	0.0719626	0.016	7.33382	0.0168447	NA	6.98532	-0.0862215	NA	7.17971	0.0544549	0.013	7.32058	0.000272017	NA	6.96216	0.025654	NA
YKL088W	CAB3	4.88091	-0.0446779	NA	5.79005	0.0292709	NA	5.65585	0.0297336	NA	5.57992	-0.2189	-0.102	5.67592	0.0653056	0.023	5.624	-0.030109	NA	5.3382	-0.0538295	NA
YKL089W	MIF2	3.41494	0.319413	NA	4.2098	0.0825182	NA	4.42158	-0.0305757	NA	4.27253	0.134871	NA	4.17259	0.100211	NA	4.3278	0.0360957	NA	3.99987	0.188812	NA
YKL090W	CUE2	4.95609	-0.0322332	NA	5.35215	-0.0124353	NA	5.60108	0.0128495	NA	5.3007	-0.124519	-0.033	5.35373	0.0388487	0.012	5.57785	-0.00882505	NA	4.97194	0.0376419	NA
YKL092C	BUD2	5.03465	0.137272	NA	5.51029	0.100166	NA	5.29887	-0.000860445	NA	5.48413	0.122198	0.024	5.49131	0.292147	0.183	5.36789	0.0526716	NA	5.16089	0.115654	NA
YKL093W	MBR1	5.18823	0.448254	0.231	5.09914	0.388934	0.226	4.34105	0.163	NA	5.01001	0.474491	0.295	5.15786	0.321788	0.184	4.83044	0.140629	NA	4.38807	0.361686	0.058
YKL096W	CWP1	9.50961	0.0631387	NA	9.83671	0.102398	0.026	10.99	0.0119545	NA	10.4098	0.0738698	NA	10.7671	0.0304413	NA	10.7018	0.0354192	NA	10.3469	-0.0131877	NA
YKL096W-A	CWP2	13.2121	0.0241974	0.014	13.2122	0.0132339	0.003	12.9808	-0.00788304	NA	13.164	0.0153025	0.003	13.303	0.00675561	NA	13.3941	0.0237486	0.016	13.7693	0.0173008	0.006
YKL098W	MTC2	5.41438	0.209942	0.029	5.90858	0.137034	0.051	5.59476	0.0223785	NA	5.81766	0.110245	0.035	5.42118	0.196627	0.108	5.5544	-0.00627149	NA	5.19576	0.194887	NA
YKL100C		6.49883	0.0475078	NA	6.56906	0.00933775	NA	6.98892	-0.00568213	NA	7.24446	-0.0781813	-0.032	7.14643	0.0545609	0.028	6.93666	-0.00542899	NA	6.49481	0.046117	NA
YKL101W	HSL1	6.7887	0.0329974	NA	6.78245	0.0679386	0.023	7.17052	0.00816387	NA	7.74558	0.0557858	0.033	7.2845	0.0590476	0.038	7.50633	0.0213767	0.007	7.56909	0.0178757	NA
YKL103C	APE1	6.63902	0.0360078	NA	6.77484	0.0267477	NA	6.69025	-0.00302351	NA	7.20923	0.0741624	0.038	6.83558	0.0182421	NA	7.01522	0.029199	0.004	7.35508	0.0942814	0.036
YKL106W	AAT1	6.32439	0.158402	NA	6.12576	0.0065431	NA	6.13947	0.0630638	NA	5.74435	-0.0618827	NA	6.22053	0.173742	0.085	6.21336	-0.147756	-0.077	6.19415	-0.0322918	NA
YKL107W		1.14959	0.00754064	NA	1.78323	0.167027	NA	1.35446	-0.166394	NA	1.56992	-0.0294802	NA	1.81128	0.00973718	NA	1.44923	-0.128747	NA	1.45362	0.392703	NA
YKL108W	SLD2	5.51702	0.475885	0.244	5.42528	0.435907	0.273	5.58809	-0.0227585	NA	5.42647	0.306682	0.155	5.13527	0.344752	0.203	5.40524	0.222854	0.093	5.30698	0.292589	0.062
YKL112W	ABF1	4.79348	0.0111962	NA	4.96067	0.0146387	NA	4.91304	-0.00669647	NA	4.93357	0.0460607	NA	4.83553	0.072448	0.019	4.74999	0.0148552	NA	4.50005	0.00294551	NA
YKL116C	PRR1	6.3248	0.372525	0.21	6.26985	0.210969	0.095	5.74895	0.0103615	NA	5.7386	0.0522043	NA	5.98439	0.305119	0.194	5.8446	0.0377093	NA	5.91708	0.256289	0.072
YKL117W	SBA1	9.68759	0.0776958	NA	9.75991	-0.0330412	NA	9.0303	-0.0360095	NA	9.53683	-0.0711404	NA	9.19196	0.195237	0.123	9.16379	0.0631112	NA	9.60734	-0.212149	-0.112
YKL120W	OAC1	6.82108	0.204028	0.088	7.09677	0.10041	0.05	7.1776	0.0294968	NA	6.50937	0.0927227	0.036	7.16236	0.178571	0.129	6.81307	0.10695	0.058	6.72745	0.0387234	NA
YKL121W	DGR2	4.6105	0.533347	0.212	5.50922	0.196193	0.091	5.26974	0.0308596	NA	5.31091	0.178738	0.078	5.35545	0.11177	0.051	5.37145	0.0679575	0.009	4.84693	0.211181	NA
YKL122C	SRP21	7.34908	0.101412	0.026	7.09445	0.228336	0.142	7.35516	0.00512825	NA	7.19822	0.219774	0.139	7.25304	0.100943	0.062	7.20661	0.165884	0.106	7.64416	-0.00407447	NA
YKL125W	RRN3	5.674	0.345528	0.173	5.90661	0.293839	0.189	5.55083	0.0135456	NA	5.733	0.0475043	0.002	5.61949	0.0806471	0.038	5.58203	-0.00677194	NA	5.47545	0.0762357	NA
YKL126W	YPK1	7.04225	0.224995	0.134	7.05372	0.163599	0.11	6.49337	0.0005858	NA	6.63164	0.296929	0.209	6.5578	0.116006	0.078	6.77524	0.00552892	NA	7.02968	0.0348696	NA
YKL128C	PMU1	5.74798	-0.00934193	NA	6.08378	0.302322	0.144	7.03185	0.0208329	NA	6.92731	0.210693	0.1	6.59025	0.320845	0.213	6.90133	0.179047	0.086	6.05947	0.301276	0.07
YKL130C	SHE2	5.75805	0.133786	NA	6.52976	0.0543369	NA	7.19388	0.0216479	NA	6.9194	0.189646	0.115	7.15294	0.164038	0.115	7.16088	0.0657804	0.031	6.84384	0.0641364	NA
YKL132C	RMA1	4.5066	0.333951	0.052	5.03337	0.0739691	NA	4.68332	0.0399502	NA	4.81802	0.192267	0.038	4.63099	0.20909	0.077	4.48489	-0.00141407	NA	4.36473	0.188886	NA
YKL133C		3.58672	0.153142	NA	4.21465	0.391325	0.194	3.37056	0.107926	NA	3.80681	0.0803723	NA	3.80607	0.343561	0.161	3.87772	0.0232469	NA	3.28089	-0.00288499	NA
YKL134C	2001-10-01	3.20069	0.142442	NA	4.14415	-0.129039	NA	4.62916	-0.00782639	NA	4.30094	-0.268861	-0.076	4.68973	0.0401086	NA	4.65026	-0.134245	NA	3.26077	0.116767	NA
YKL135C	APL2	6.43547	0.419398	0.269	6.6605	0.386774	0.283	6.24064	0.0309448	NA	6.20757	0.205479	0.093	6.31924	0.229548	0.141	6.34017	0.189561	0.087	6.53652	0.170605	0.035
YKL140W	TGL1	5.79511	0.503105	0.313	5.78611	0.32696	0.183	5.49729	0.0210009	NA	5.40824	0.374529	0.212	5.52194	0.234304	0.122	5.61099	0.0515778	NA	5.21202	0.272506	0.035
YKL142W	MRP8	7.4231	0.150096	0.085	7.68828	0.0714948	0.043	6.7589	0.0160401	NA	7.2478	0.175699	0.121	6.95824	0.100341	0.069	7.16254	-0.00604456	NA	7.71282	0.0143488	NA
YKL143W	LTV1	4.40192	0.0956394	NA	4.66335	0.161647	NA	5.21676	0.0168613	NA	5.53783	0.216148	0.092	4.89012	0.176073	0.065	4.86294	0.0173565	NA	4.85731	0.211311	NA
YKL144C	RPC25	4.19835	0.155537	NA	4.45468	-0.00488368	NA	5.43225	-0.0166726	NA	5.20995	0.107801	0.012	5.25485	0.0472387	NA	5.32884	0.0740609	NA	4.87074	0.00284848	NA
YKL145W	RPT1	7.03487	0.282699	0.156	7.28915	0.246775	0.146	6.83644	-0.0111807	NA	6.92847	0.103791	NA	6.80559	0.140263	0.062	7.09892	0.192389	0.103	6.62755	0.195049	0.047
YKL150W	MCR1	7.4651	0.167431	0.027	7.69649	0.0752327	NA	7.4338	-0.0877448	NA	7.89222	0.0341029	NA	7.67159	0.126917	0.055	7.55529	0.0952635	0.022	7.5518	-0.0401704	NA
YKL152C	GPM1	12.7644	0.0570383	0.017	12.576	0.0214535	NA	12.589	0.00940219	NA	12.8725	0.0482703	0.013	12.7513	0.0251854	NA	13.0881	0.0808413	0.03	13.4569	0.0138525	NA
YKL155C	RSM22	6.27104	0.16678	0.075	6.04548	0.149718	0.08	5.19569	0.00656776	NA	5.30668	0.227173	0.121	5.21034	0.14502	0.076	5.67497	0.0277337	NA	5.68301	0.032432	NA
YKL156W	RPS27A	8.50414	0.0329197	0.007	8.63339	0.00896393	NA	8.40606	0.00207056	NA	8.61522	0.00962828	0.002	8.34145	0.0411163	0.027	8.49569	-0.000756387	NA	8.49922	0.001216	NA
YKL157W	APE2	6.68405	0.551208	0.382	6.93872	0.37897	0.282	7.14615	0.0671641	NA	7.20571	0.317034	0.224	7.18609	0.218639	0.153	7.27673	0.132947	0.062	6.7814	0.132902	NA
YKL159C	RCN1	4.24877	-0.088344	NA	4.26665	0.0943206	NA	4.9233	-0.032764	NA	4.18505	0.295669	0.071	4.74324	0.0454161	NA	4.92023	0.0893875	NA	4.43233	0.362027	0.056
YKL162C		4.53765	0.284703	0.016	5.72586	0.0739513	NA	4.86984	0.0111103	NA	5.06652	-0.0258419	NA	4.92354	0.125194	0.046	5.00706	0.0307079	NA	4.78501	0.237114	0.017
YKL164C	PIR1	7.33583	0.0879674	0.011	7.6733	0.108437	0.056	7.06574	-0.00867624	NA	7.34772	-0.171221	-0.084	6.90282	0.0677387	0.022	7.34238	0.0557015	0.008	7.61376	0.0820579	0.009
YKL165C	MCD4	5.98367	0.243516	0.05	6.06574	0.0507125	NA	7.41685	0.0499507	NA	6.55507	0.237112	0.117	6.94637	0.221376	0.14	7.38327	0.222123	0.134	6.24806	0.168494	NA
YKL167C	MRP49	5.70325	0.216538	NA	5.76203	0.291077	0.135	6.12259	0.110293	NA	6.26581	0.28868	0.161	6.30761	0.2034	0.114	6.13484	0.357086	0.221	5.9164	0.200307	NA
YKL168C	KKQ8	4.55385	0.069313	NA	5.67099	-0.159178	-0.03	5.24106	-0.0245663	NA	5.3268	-0.0597151	NA	5.25792	0.0646583	NA	5.45076	0.00284105	NA	4.89618	0.0649968	NA
[truncated: 1,512 more rows]
