# Supplementary material for: Genetic and pharmacological evidence for kinetic competition between alternative poly(A) sites in yeast
Source: eLife. 2021 Jul 7;10:e65331. doi: 10.7554/eLife.65331 (PMC8263057; doi:10.7554/eLife.65331)
Supplement: Figure 3—source data 1. — The full list of genes undergoing APA in the NNS subunit mutant allele PAT-assay experiment and their effect size and confect values. [file elife-65331-fig3-data1.xlsx]

## Sheet: Sheet1
name	gene	sen1 average expression	sen1 effect value	sen1 confect value	nab3 average expression	nab3 effect value	nab3 confect value	nrd1 average expression	nrd1 effect value	nrd1 confect value
YAL003W	EFB1	11.7366	-0.0377047	NA	11.2611	0.0192991	NA	11.6916	0.00775826	NA
YAL005C	SSA1	13.5142	0.0136206	NA	13.2035	0.0127905	NA	13.5803	-0.0402715	NA
YAL007C	ERP2	7.70949	-0.0112109	NA	7.71558	0.0261145	NA	7.92256	0.0179921	NA
YAL015C	NTG1	6.58677	-0.110187	-0.019	6.60412	-0.194286	NA	6.87652	-0.0749249	NA
YAL019W	FUN30	6.37215	-0.0293538	-0.003	6.16578	-0.00101599	NA	6.44033	-0.0229895	NA
YAL020C	ATS1	7.16988	-0.0137631	NA	7.15237	-0.00768592	NA	7.4481	-0.0090281	NA
YAL021C	CCR4	7.32317	0.0244694	NA	7.5317	0.0316956	NA	7.50412	0.0268518	NA
YAL029C	MYO4	6.99903	-0.0319703	NA	6.34293	0.0620443	NA	6.94513	0.00955975	NA
YAL031C	GIP4	5.03711	-0.0740791	NA	5.03947	-0.0866065	NA	5.10881	-0.137633	NA
YAL036C	RBG1	7.51382	-0.0287858	NA	7.63204	0.202246	NA	7.54768	-0.107161	NA
YAL037W		3.31657	0.0457697	NA	3.65884	-0.0765713	NA	3.70491	0.0822128	NA
YAL038W	CDC19	11.3913	-0.000732621	0	11.1843	0.00571309	NA	11.1074	-0.000424736	NA
YAL040C	CLN3	6.96038	-0.113769	-0.037	7.62103	0.0210565	NA	7.29773	-0.0461521	NA
YAL041W	CDC24	7.52324	-0.00630808	NA	6.94469	0.0209887	NA	7.38694	-0.0126478	NA
YAL051W	OAF1	5.43816	0.00574485	NA	5.5879	0.0325102	NA	5.42239	-0.00855867	NA
YAL058W	CNE1	6.17473	-0.0300501	NA	5.91446	-0.0382862	NA	6.11413	-0.0412901	NA
YAL059C-A		1.53573	-0.00662917	NA	2.76434	0.13261	NA	1.96451	-0.110784	NA
YAL061W	BDH2	4.24849	0.150693	NA	4.3863	0.0799932	NA	4.12962	0.0364539	NA
YAL062W	GDH3	5.08105	0.0287091	NA	5.01219	0.0274184	NA	5.25761	0.0577145	NA
YAL063C-A		2.76321	-0.0770847	NA	3.52442	0.0559015	NA	3.59155	-0.0779983	NA
YAR002C-A	ERP1	8.23604	0.012246	NA	8.26989	0.0339584	NA	8.19351	0.0141744	NA
YAR002W	NUP60	6.88773	-0.0297225	NA	6.9312	0.0207998	NA	6.89008	-0.051975	NA
YAR018C	KIN3	6.01281	-0.0162039	NA	5.84005	0.0995165	NA	6.27104	0.0211009	NA
YAR019C	CDC15	5.48986	0.0551498	NA	5.27941	-0.0233077	NA	5.55255	0.0810999	NA
YAR027W	UIP3	6.39375	-0.0437191	NA	6.20785	-0.0864453	NA	6.35035	-0.0312946	NA
YAR028W		5.11552	0.0607465	0.01	4.16364	0.0223992	NA	4.82426	0.0537784	NA
YAR035W	YAT1	5.69145	0.186697	0.059	6.2208	0.0710546	NA	6.02451	0.130472	NA
YAR042W	SWH1	6.91697	-0.00701476	NA	6.82425	-0.0252424	NA	6.68855	-0.019354	NA
YBL001C	ECM15	9.97404	-0.0255631	-0.014	9.58954	0.0530438	NA	9.78121	-0.0169915	NA
YBL002W	HTB2	10.7168	0.0111303	NA	9.81041	-0.0221351	NA	10.6913	0.00228042	NA
YBL003C	HTA2	11.0106	0.00500182	NA	10.2113	0.0400544	NA	11.0561	0.00132352	NA
YBL004W	UTP20	6.0203	0.0259706	NA	5.71746	0.0799601	NA	6.21729	0.0235353	NA
YBL006C	LDB7	8.37536	-0.00840825	NA	7.9077	-0.0136803	NA	8.37151	-0.021713	NA
YBL007C	SLA1	7.01721	-0.06143	-0.001	6.94388	-0.039168	NA	7.01845	-0.0558835	NA
YBL008W	HIR1	5.57803	-0.0883085	NA	5.67493	0.0279505	NA	5.80796	-0.0671627	NA
YBL010C		5.65903	-0.100063	NA	5.91399	-0.0375092	NA	5.81136	-0.0668858	NA
YBL011W	SCT1	5.79547	-0.0319562	NA	5.41855	-0.0606336	NA	5.95315	-0.0706535	NA
YBL014C	RRN6	5.93233	0.0180778	NA	5.75977	0.00689206	NA	5.9863	0.0282457	NA
YBL015W	ACH1	6.65251	-0.0620765	NA	6.89638	-0.165185	NA	7.13706	-0.0845699	NA
YBL018C	POP8	5.26917	0.00935818	NA	4.51619	0.0136354	NA	5.24622	0.0336977	NA
YBL024W	NCL1	6.55394	-0.16002	-0.055	6.28235	0.0679626	NA	6.33176	-0.129105	NA
YBL026W	LSM2	7.64898	-0.00811757	NA	7.30895	0.0585824	NA	7.66895	0.0688518	NA
YBL027W	RPL19B	9.74044	0.0113064	NA	9.47245	-0.04817	NA	9.67526	0.0236563	NA
YBL028C		6.31349	-0.0379909	NA	5.71231	-0.151828	NA	6.31782	-0.0289493	NA
YBL029W		4.73448	0.54374	0.364	4.71725	0.152255	NA	4.92766	-0.0047252	NA
YBL030C	PET9	9.20032	-0.0870639	-0.015	9.27531	0.0234757	NA	9.71582	0.0525622	NA
YBL033C	RIB1	5.35268	-0.146643	-0.052	5.81107	0.167462	NA	5.54738	-0.0888441	NA
YBL035C	POL12	5.26022	-0.0107022	NA	5.28813	-0.0781873	NA	5.26814	-0.0380665	NA
YBL039C	URA7	7.09871	-0.0832514	NA	6.70675	0.0613921	NA	6.90018	-0.029351	NA
YBL041W	PRE7	7.14674	-0.0775851	NA	7.29639	-0.238256	NA	7.07792	-0.0761956	NA
YBL042C	FUI1	7.4664	-0.0268497	NA	7.43162	0.0466017	NA	7.80259	-0.145603	NA
YBL044W		1.65899	0.165268	NA	1.91961	0.0667936	NA	1.72562	-0.0103522	NA
YBL045C	COR1	8.56088	-0.047064	NA	8.768	0.164073	NA	9.25646	-0.00758881	NA
YBL046W	PSY4	3.98629	0.0316098	NA	4.27657	-0.0355006	NA	3.96961	-0.132975	NA
YBL047C	EDE1	7.15665	-0.0750989	NA	6.54021	0.0136622	NA	7.14233	-0.026395	NA
YBL051C	PIN4	5.95171	-0.0259038	NA	5.45062	0.0543509	NA	5.73658	-0.0683518	NA
YBL055C		4.84697	-0.0205262	NA	4.44304	-0.0165568	NA	4.91167	-0.0357004	NA
YBL056W	PTC3	7.41258	-0.127409	-0.028	7.14451	0.0226001	NA	7.37096	-0.0748934	NA
YBL059C-A	CMC2	6.0771	-0.0446685	NA	5.86729	0.0648295	NA	6.15334	-0.0268879	NA
YBL059W		4.57587	0.0157551	NA	4.67745	-0.0586567	NA	4.9922	-0.0438295	NA
YBL066C	SEF1	5.7836	-0.027837	NA	6.30016	0.0490581	NA	6.024	-0.00917121	NA
YBL068W	PRS4	6.6885	-0.0694456	-0.016	7.08044	-0.0541622	NA	6.79751	0.00270488	NA
YBL068W-A/YBL069W	AST1	6.2976	-0.187196	-0.067	6.46466	-0.19507	NA	6.35308	-0.0249298	NA
YBL072C	RPS8A	10.9211	0.0139002	NA	10.6102	0.12491	NA	10.8607	-0.0305258	NA
YBL078C	ATG8	5.23765	-0.0372443	NA	5.46105	0.0100498	NA	5.37907	0.0720926	NA
YBL079W	NUP170	9.11917	-0.0151067	-0.004	8.38851	0.00546554	NA	9.19589	-0.0212304	NA
YBL081W		7.1529	0.0561596	NA	7.40842	-0.0344919	NA	7.39998	0.0223491	NA
YBL084C	CDC27	3.92157	-0.00832542	NA	4.10334	0.0273472	NA	4.15928	0.0482312	NA
YBL089W	AVT5	5.41328	-0.0624529	NA	5.43882	0.0388685	NA	5.61988	0.00256745	NA
YBL092W	RPL32	11.005	-0.103582	-0.033	11.0028	-0.118035	NA	10.9724	-0.137536	NA
YBL095W		5.92599	-0.023743	NA	6.35741	0.00396732	NA	6.42285	-0.0181635	NA
YBL097W	BRN1	5.1332	0.143465	0.004	4.91209	-0.0211135	NA	5.13024	0.279895	NA
YBL099W	ATP1	8.5476	-0.0423661	NA	8.79936	0.173024	NA	8.71187	0.00633709	NA
YBL103C	RTG3	5.08964	-0.0439111	NA	5.13272	0.00321763	NA	5.10358	-0.0539182	NA
YBL105C	PKC1	6.73791	-0.0259482	NA	6.19027	0.0215225	NA	6.61018	0.00204367	NA
YBL106C	SRO77	4.60884	-0.0699555	NA	4.42469	-0.111608	NA	4.48984	-0.0437238	NA
YBL109W		2.01434	0.198355	NA	2.80894	0.177343	NA	2.77583	-0.175131	NA
YBR001C	NTH2	6.72625	-0.0312177	NA	6.5008	-0.0572294	NA	6.87335	-0.0451987	NA
YBR002C	RER2	6.02915	-0.0838415	NA	5.57108	0.2104	NA	6.1101	-0.0738462	NA
YBR007C	DSF2	6.24734	-0.045418	NA	5.90098	0.109654	NA	6.46797	-0.0124043	NA
YBR008C	FLR1	5.25183	-0.364696	-0.189	5.38619	-0.203981	NA	5.75677	-0.0901956	NA
YBR009C	HHF1	10.1933	-0.00493247	0	9.63911	0.0138026	NA	10.2229	0.0593712	0.015
YBR010W	HHT1	10.3696	-0.00318939	NA	9.74791	-0.0327721	NA	10.6701	0.0129396	NA
YBR011C	IPP1	10.4286	0.0102306	0.006	9.77166	0.017745	NA	10.4161	0.00105232	NA
YBR012W-B		3.59955	0.316009	0.161	3.51513	0.0149313	NA	NA	NA	NA
YBR014C	GRX7	7.35376	-0.000682908	NA	6.81759	0.0745197	NA	7.5802	-0.0188434	NA
YBR016W		7.80833	-0.035286	NA	8.13152	-0.0701592	NA	7.9104	-0.10725	NA
YBR017C	KAP104	7.03908	-0.116587	-0.034	6.7985	-0.0754856	NA	6.86206	-0.0181967	NA
YBR020W	GAL1	2.63324	-0.151078	NA	2.88473	-0.260337	NA	2.95928	-0.12405	NA
YBR024W	SCO2	6.78869	-0.121898	-0.023	6.71411	-0.101403	NA	6.86533	-0.096362	NA
YBR025C	OLA1	10.2856	-0.104492	-0.04	9.89191	-0.0424948	NA	10.2318	-0.0553786	NA
YBR029C	CDS1	6.89085	-0.0446002	NA	6.8559	0.128997	NA	6.83147	0.0454148	NA
YBR030W	RKM3	4.7014	0.00282528	NA	4.83207	0.0333684	NA	4.76738	0.0131262	NA
YBR031W	RPL4A	9.74029	-0.00253415	0	9.48687	0.00293356	NA	9.60499	0.000529719	NA
YBR033W	EDS1	3.9335	-0.107845	NA	3.40757	-0.114584	NA	3.8876	-0.18992	NA
YBR034C	HMT1	6.83321	-0.0254567	-0.008	6.75876	0.0142398	NA	7.0076	-0.0238712	NA
YBR036C	CSG2	6.3689	-0.163519	-0.05	6.21605	-0.102469	NA	6.25068	-0.0793177	NA
YBR046C	ZTA1	5.77532	0.0333868	NA	5.32823	0.101501	NA	5.16233	0.195009	NA
YBR052C	RFS1	8.68507	-0.000304464	NA	8.77239	-0.000283416	NA	8.82298	0.000634573	NA
YBR053C		6.91043	-0.00526659	NA	6.62367	0.0212469	NA	6.63383	-0.000297145	NA
YBR054W	YRO2	8.61915	-0.0333331	NA	8.72377	0.0189491	NA	8.27165	-0.00972011	NA
YBR056W		5.72777	-0.0166981	NA	5.44101	0.0340493	NA	5.59736	-0.00343237	NA
YBR057C	MUM2	5.34429	-0.016799	NA	5.14454	0.0653911	NA	5.50067	-0.00892886	NA
YBR058C	UBP14	6.0799	-0.000879963	NA	5.91529	-0.0319564	NA	6.08477	0.0111945	NA
YBR061C	TRM7	5.5094	-0.148303	-0.023	5.58903	-0.185227	NA	5.67955	-0.0462429	NA
YBR063C		6.41063	-0.0621488	NA	6.30579	0.125123	NA	6.52445	-0.0118696	NA
YBR070C	ALG14	6.44123	0.0125484	NA	5.90765	0.059687	NA	6.3793	0.016489	NA
YBR074W	PFF1	6.08699	-0.033823	NA	5.86024	0.0283622	NA	5.98396	-0.019972	NA
YBR078W	ECM33	9.73265	-0.10586	-0.023	9.66791	0.050075	NA	9.84321	-0.049593	NA
YBR079C	RPG1	9.00634	0.00352492	NA	8.5873	0.012615	NA	8.90067	-0.000219043	NA
YBR084W	MIS1	8.18799	-0.055552	NA	7.5245	-0.175132	NA	8.20935	-0.144485	NA
YBR085C-A		9.0589	-0.0587409	NA	9.35373	0.0532542	NA	9.08737	-0.0199972	NA
YBR085W	AAC3	4.13486	0.0694525	NA	2.75035	0.425115	NA	3.45773	0.0392648	NA
YBR089C-A	NHP6B	6.93001	0.0347724	0.003	7.40161	0.0306868	NA	7.27341	0.00519215	NA
YBR092C	PHO3	7.61856	0.142435	0.042	7.12602	0.048442	NA	7.8238	0.100074	NA
YBR094W	PBY1	6.13283	-0.0254819	NA	5.86311	-0.0322823	NA	6.33566	-0.0270599	NA
YBR097W	VPS15	5.12211	-0.207092	-0.06	5.096	-0.219519	NA	5.23628	-0.188003	NA
YBR098W	MMS4	4.08352	-0.10614	NA	4.09839	0.105887	NA	4.2478	-0.00695693	NA
YBR101C	FES1	8.02006	-0.023562	NA	8.06201	0.026795	NA	8.02985	-0.013668	NA
YBR102C	EXO84	5.92633	-0.0143083	NA	4.82089	-0.0794048	NA	5.30037	0.0247458	NA
YBR106W	PHO88	9.9571	-0.0403847	-0.024	9.25442	0.0569599	NA	9.91009	-0.00228485	NA
YBR108W	AIM3	6.54316	0.0043583	NA	6.5815	-0.021544	NA	6.55829	-0.00496074	NA
YBR109C	CMD1	9.83528	0.0011471	NA	9.4102	0.0101973	NA	9.94683	0.00270559	NA
YBR111C	YSA1	7.81131	-0.00460038	NA	7.22427	0.00837189	NA	7.69495	-0.00994411	NA
YBR112C	CYC8	6.06007	-0.11835	-0.009	5.88383	-0.100891	NA	6.00757	-0.103289	NA
YBR114W	RAD16	4.74912	-0.0586232	NA	5.23413	-0.046281	NA	4.77577	0.150566	NA
YBR115C	LYS2	7.44304	-0.133715	-0.037	6.93475	-0.122513	NA	7.00954	0.257766	0.085
YBR118W	TEF2	12.2437	0.000441649	NA	12.1556	0.00344835	NA	12.4794	-0.000333312	NA
YBR119W	MUD1	5.09253	-0.00803441	NA	4.73794	-0.0838704	NA	5.24958	-0.0318221	NA
YBR121C	GRS1	8.24103	0.0383022	NA	7.62056	0.0263659	NA	8.09981	0.023768	NA
YBR124W		-0.487287	-0.042616	NA	1.56937	-0.154065	NA	0.204187	-0.282466	NA
YBR125C	PTC4	6.00785	-0.103911	-0.007	6.26271	-0.128145	NA	6.14364	-0.108623	NA
YBR126W-A/YBR126W-B		10.0292	0.0127734	NA	9.74184	-0.138839	NA	10.1287	-0.0185144	NA
YBR131W	CCZ1	4.77209	-0.0973579	NA	4.68723	0.0230953	NA	4.93327	-0.0749472	NA
YBR133C	HSL7	6.58332	-0.165969	-0.059	6.58345	-0.0434657	NA	6.75469	-0.0893407	NA
YBR135W	CKS1	7.69476	-0.0595667	NA	7.5952	-0.00459315	NA	7.67072	0.00166696	NA
YBR137W		6.97994	0.00233883	NA	7.02309	0.0202435	NA	7.1899	0.0293239	NA
YBR139W		6.7696	-0.0815817	-0.01	6.8295	0.0312211	NA	6.77559	-0.0373165	NA
YBR141C	BMT2	4.63801	-0.123947	NA	4.4973	-0.0611599	NA	4.88643	-0.117897	NA
YBR143C	SUP45	8.86102	-0.039468	NA	8.53387	-0.0923283	NA	8.80068	-3.48785e-06	NA
YBR149W	ARA1	7.88877	-0.0276519	NA	8.16348	-0.0153747	NA	7.55739	0.0172612	NA
YBR151W	APD1	6.93315	0.0061347	NA	6.96934	0.0560866	NA	6.91651	0.0057529	NA
YBR153W	RIB7	5.00188	-0.134801	NA	5.02545	-0.127334	NA	5.19108	-0.202979	NA
YBR155W	CNS1	7.18014	-0.0354791	NA	6.49446	-0.0520718	NA	7.31548	-0.0548808	NA
YBR156C	SLI15	4.98749	-0.0233333	NA	4.90224	0.0447193	NA	5.14334	-0.0220451	NA
YBR159W	IFA38	7.18332	0.0954758	0.021	6.9247	0.142137	NA	7.00326	0.0608875	NA
YBR160W	CDC28	7.55797	-0.00508182	NA	7.92467	-0.00735916	NA	7.6765	-0.00124078	NA
YBR161W	CSH1	5.75604	-0.0321445	NA	5.7135	2.02129e-05	NA	5.93684	-0.0570303	NA
YBR162C	TOS1	9.07156	-0.0542925	NA	8.73036	0.170681	NA	8.93489	-0.0705621	NA
YBR163W	EXO5	7.04403	-0.168877	-0.078	6.49674	0.200613	NA	7.07299	-0.0714763	NA
YBR164C	ARL1	6.31287	-0.15982	-0.057	6.12428	0.102286	NA	6.41462	-0.0803028	NA
YBR165W	UBS1	4.21785	-0.0303856	NA	4.0827	0.00767776	NA	4.08729	0.0241989	NA
YBR166C	TYR1	6.09078	-0.0282536	NA	6.03206	-0.0316519	NA	6.10505	-0.0242715	NA
YBR170C	NPL4	6.32599	-0.194044	-0.078	6.39918	-0.180749	NA	6.48584	-0.207982	NA
YBR173C	UMP1	7.73959	-0.0252471	NA	7.99042	-0.0156562	NA	7.89922	-0.0244269	NA
YBR176W	ECM31	5.6706	-0.01538	NA	5.329	-0.117043	NA	5.65886	-0.037458	NA
YBR177C	EHT1	7.01607	-0.0123257	NA	7.23008	0.01234	NA	7.19751	-0.0236627	NA
YBR181C	RPS6B	9.20754	0.00104411	NA	8.81377	0.0131477	NA	8.96525	0.00144722	NA
YBR185C	MBA1	6.02784	-0.0154999	NA	6.4035	0.00804227	NA	6.55941	-0.03945	NA
YBR187W	GDT1	7.36978	-0.0115822	NA	7.03423	0.0697366	NA	7.31966	-0.0149186	NA
YBR188C	NTC20	5.51871	-0.0493991	NA	6.18232	-0.100703	NA	5.96346	-0.0397896	NA
YBR189W	RPS9B	12.1049	-0.000170947	NA	12.1791	0.000923545	NA	11.9912	0.000565081	NA
YBR192W	RIM2	5.7803	-0.186998	-0.062	6.04558	-0.0469617	NA	5.9638	-0.0370326	NA
YBR193C	MED8	4.98826	-0.107045	NA	4.96892	-0.00883042	NA	4.91024	-0.0778373	NA
YBR198C	TAF5	6.11978	0.000191414	NA	5.83582	-0.0099586	NA	6.13301	0.0110555	NA
YBR199W	KTR4	7.19381	-0.0026283	NA	6.66057	0.0324729	NA	7.15271	-0.0485706	NA
YBR201W	DER1	5.81124	-0.0645663	-0.009	5.54875	-0.0373599	NA	5.6319	-0.0303364	NA
YBR202W	MCM7	4.78933	0.0314723	NA	5.16946	0.0410409	NA	4.91738	-0.00272232	NA
YBR203W	COS111	4.50684	-0.208304	-0.047	5.46512	0.0282692	NA	5.15634	-0.0624944	NA
YBR206W		8.12308	0.0495901	NA	7.86985	0.0368741	NA	8.12596	0.0475379	NA
YBR210W	ERV15	4.93614	0.085113	0.016	4.77194	0.0654302	NA	4.72216	-0.0118501	NA
YBR212W	NGR1	6.26662	-0.0208692	NA	6.5641	-0.00273382	NA	6.24347	-0.00950029	NA
YBR213W	MET8	4.12641	-0.0314154	NA	4.6602	0.000391399	NA	4.75425	-0.073265	NA
YBR214W	SDS24	5.98623	-0.0170951	NA	6.3086	0.0596613	NA	6.38661	-0.0873798	NA
YBR215W	HPC2	6.13834	-0.0519781	NA	5.53464	0.0375146	NA	6.08527	-0.0140335	NA
YBR216C	YBP1	5.76678	-0.0904282	NA	5.7615	0.031435	NA	5.7732	-0.0964804	NA
YBR218C	PYC2	7.92389	-0.0313174	-0.003	7.71992	0.0065151	NA	7.59919	-0.0106406	NA
YBR220C		6.47491	-0.148151	-0.05	6.49423	-0.0368346	NA	6.56621	-0.0709332	NA
YBR221C	PDB1	8.70019	-0.0324765	NA	8.2128	0.0189423	NA	8.42057	-0.0225798	NA
YBR225W		4.9466	-0.0137551	NA	5.2756	0.0622906	NA	4.95796	0.00994534	NA
YBR229C	ROT2	7.4461	-0.00212937	NA	6.6167	0.0216682	NA	7.21003	-0.00569506	NA
YBR230C	OM14	8.41798	-0.0524466	NA	8.78796	-0.0841543	NA	8.72156	0.0129242	NA
YBR231C	SWC5	6.37118	-0.000814904	NA	6.63344	-0.0144556	NA	6.59353	-0.0119326	NA
YBR233W	PBP2	6.11563	-0.0303485	NA	5.83837	0.0927367	NA	6.20908	-0.0451859	NA
YBR233W-A	DAD3	5.58391	-0.0250736	NA	5.21199	0.0508509	NA	5.62624	0.00853123	NA
YBR237W	PRP5	4.83123	-0.090421	-0.035	4.99086	-0.0376699	NA	4.93932	-0.0223668	NA
YBR239C	ERT1	5.48153	-0.0357082	NA	5.23875	-0.0048006	NA	5.35144	-0.0126961	NA
YBR241C		6.36213	-0.00511646	NA	6.82092	-0.00696865	NA	6.39563	-0.00135624	NA
YBR242W		5.2738	-0.0262347	NA	5.87699	-0.0418779	NA	5.45202	-0.0186639	NA
YBR243C	ALG7	6.75868	-0.149715	-0.056	6.81737	0.0727117	NA	6.85521	-0.0308137	NA
YBR246W	RRT2	6.91184	0.0212076	NA	6.70448	0.0353021	NA	7.07611	-0.00338834	NA
YBR247C	ENP1	6.37071	0.0598577	NA	5.97419	0.143822	NA	6.53067	-0.00349877	NA
YBR248C	HIS7	7.661	0.0240821	NA	7.16824	0.00992941	NA	7.66178	0.000165363	NA
YBR249C	ARO4	9.44218	-0.132424	-0.04	8.77459	0.0573426	NA	9.28882	-0.137418	NA
YBR253W	SRB6	6.41148	-0.029072	NA	6.61955	0.0440146	NA	6.79258	-0.0126102	NA
YBR255W	MTC4	4.8358	-0.093137	NA	4.81331	0.137206	NA	4.84869	-0.121128	NA
YBR257W	POP4	5.08874	-0.0934608	NA	4.99705	0.118346	NA	5.29812	-0.13515	NA
YBR258C	SHG1	4.7907	-0.0759329	NA	4.78388	-0.0630166	NA	4.86816	-0.0609112	NA
YBR259W		5.30974	0.0067253	NA	5.32071	0.201207	NA	5.49364	0.0227833	NA
YBR260C	RGD1	5.69412	-0.00367456	NA	5.35593	0.0469889	NA	5.60688	0.00424359	NA
YBR263W	SHM1	8.09439	-0.000277748	NA	7.91869	0.00345859	NA	7.96115	-0.00369054	NA
YBR271W	EFM2	4.86185	0.00971568	NA	4.82245	-0.0292155	NA	5.15289	-0.109932	NA
YBR274W	CHK1	5.77372	-0.0615425	NA	5.69707	0.290445	NA	6.00376	-0.0817826	NA
YBR275C	RIF1	6.94759	0.0211233	NA	6.69317	0.0202313	NA	6.80999	-0.0351399	NA
YBR278W	DPB3	6.25772	0.430329	0.294	5.43123	-0.0511191	NA	5.93747	-0.0133676	NA
YBR279W	PAF1	5.65807	-0.00136139	NA	5.64402	0.0581558	NA	5.82128	0.0113619	NA
YBR283C	SSH1	8.94497	-0.0909844	NA	8.47735	-0.0621653	NA	8.86185	-0.130577	NA
YBR284W		4.38975	-0.00530974	NA	4.78022	-0.190839	NA	4.71497	-0.0490012	NA
YBR287W		6.53848	-0.00639671	NA	6.69144	0.00562772	NA	6.51818	-0.00337359	NA
YBR291C	CTP1	5.45666	-0.0178383	NA	5.61404	0.166699	NA	5.15806	-0.0597023	NA
YBR293W	VBA2	5.23775	-0.0585014	NA	5.48165	-0.0251091	NA	5.16326	0.00191331	NA
YBR295W	PCA1	4.77066	-0.0833856	NA	5.02956	-0.046918	NA	4.85778	-0.0870064	NA
YBR301W	PAU24	2.49974	0.037146	NA	2.674	-0.113924	NA	2.55671	-0.0871821	NA
YCL002C		5.95191	-0.138315	-0.025	5.13967	-0.11154	NA	6.07685	-0.0461425	NA
YCL005W	LDB16	5.56604	-0.00304802	NA	5.88604	-0.0504867	NA	5.68367	-0.033522	NA
YCL009C	ILV6	9.04938	0.0284786	NA	9.55856	-0.0299475	NA	9.0938	0.0248942	NA
YCL011C	GBP2	7.4161	-0.0123912	NA	7.4815	0.0176829	NA	7.31659	-0.0126512	NA
YCL012C		5.66222	-0.000364164	NA	6.03569	0.0306127	NA	5.85204	-0.0072908	NA
YCL014W	BUD3	5.73294	0.00906222	NA	5.41073	0.176445	NA	5.91667	0.0111951	NA
YCL017C	NFS1	7.38285	-0.278943	-0.164	7.00711	0.142311	NA	7.29882	0.111143	NA
YCL018W	LEU2	6.13205	0.0178635	NA	6.09604	-0.0490838	NA	6.02176	0.0284907	NA
YCL019W		4.47149	-0.0403312	NA	4.86783	-0.00488695	NA	4.5124	-0.0905047	NA
YCL021W-A		5.95652	0.00115684	NA	6.34347	-0.129704	NA	5.76105	0.00018579	NA
YCL029C	BIK1	5.13361	-0.0465292	NA	4.81935	0.0519888	NA	5.215	-0.0546095	NA
YCL032W	STE50	6.59168	-0.0600194	NA	6.6271	-0.0856049	NA	6.88847	0.00060003	NA
YCL036W	GFD2	5.81378	-0.0543469	NA	6.59061	-0.0753197	NA	6.24905	-0.0690415	NA
YCL037C	SRO9	4.44047	0.0394242	NA	4.00043	0.0233656	NA	4.10083	0.0444369	NA
YCL047C	POF1	6.50856	0.040972	0	6.25364	0.0464678	NA	6.61731	0.0854061	NA
YCL049C		6.30802	-0.0179128	NA	5.63695	0.00206124	NA	6.46246	-0.0215469	NA
YCL050C	APA1	7.85135	0.00877933	0	7.55201	0.0213078	NA	7.69798	0.0063325	NA
YCL051W	LRE1	5.20175	-0.150642	-0.033	4.7482	-0.0788764	NA	5.31647	-0.129475	NA
YCL055W	KAR4	5.23738	0.131517	0.022	4.85895	0.0490692	NA	4.792	0.230277	NA
YCL061C	MRC1	5.24131	-0.00272154	NA	4.6762	0.0263873	NA	5.10265	-0.0120101	NA
YCL064C	CHA1	6.8892	-0.0374729	NA	6.28377	-0.0172933	NA	5.23152	0.00198509	NA
YCR002C	CDC10	6.88317	0.0257273	NA	6.49867	0.155889	NA	6.83901	0.108759	NA
YCR003W	MRPL32	6.09159	0.075283	0.014	5.69683	0.0446102	NA	6.18072	-0.019898	NA
YCR004C	YCP4	8.20403	-0.0850489	-0.014	8.02756	0.0241885	NA	7.96849	0.0117005	NA
YCR007C		4.46945	-0.161621	-0.017	4.23459	-0.104008	NA	4.16941	0.0862987	NA
YCR009C	RVS161	7.59797	-0.247043	-0.136	7.73282	-0.131909	NA	7.39269	-0.162211	NA
YCR011C	ADP1	8.93284	-0.00159756	NA	8.41878	0.0484384	NA	8.81893	0.00121595	NA
YCR017C	CWH43	7.0739	-0.115127	-0.036	6.57531	0.0312786	NA	7.17564	0.00676156	NA
YCR018C	SRD1	5.89208	-0.0652452	NA	5.50937	0.0165832	NA	5.60598	0.0402552	NA
YCR022C		1.39453	-0.0538075	NA	1.75798	-0.183498	NA	1.55805	-0.192513	NA
YCR024C	SLM5	5.21616	-0.00771249	NA	5.46496	0.00996285	NA	5.59896	-0.0174591	NA
YCR024C-B		10.4121	-0.0676437	NA	9.91675	0.142349	NA	10.1992	-0.0658374	NA
YCR026C	NPP1	5.97927	0.0119572	NA	5.65539	-0.1181	NA	6.23123	-0.142787	NA
YCR027C	RHB1	5.26956	-0.15696	-0.025	5.18293	-0.0605373	NA	5.2031	-0.176679	NA
YCR028C	FEN2	3.69565	0.13732	NA	2.88201	-0.110395	NA	3.0683	0.0107312	NA
YCR028C-A	RIM1	7.82522	-0.16206	-0.071	7.10231	-0.190523	NA	7.92102	-0.0222478	NA
YCR032W	BPH1	4.89934	-0.0149	NA	5.34783	-0.102568	NA	5.26091	-0.0622859	NA
YCR034W	ELO2	7.69837	-0.031937	-0.007	7.28345	0.0433656	NA	7.95941	-0.00453257	NA
YCR036W	RBK1	6.52586	0.0117396	NA	6.56646	-0.0145401	NA	6.68779	0.00146612	NA
YCR038C	BUD5	4.65833	-0.0990596	NA	4.51883	-0.00927371	NA	4.85436	0.00563181	NA
YCR046C	IMG1	7.72176	0.024054	NA	7.79761	-0.00271203	NA	8.05304	0.0179914	NA
YCR047C	BUD23	6.49255	-0.0385063	NA	6.65532	-0.0348401	NA	6.75613	-0.0113453	NA
YCR054C	CTR86	5.02061	0.0264365	NA	5.03477	0.0546293	NA	5.06572	0.0696514	NA
YCR061W		6.87195	-0.0375088	NA	6.90208	-0.0142705	NA	6.72291	-0.0625682	NA
YCR064C		3.1986	0.00314117	NA	2.35067	0.0755428	NA	2.98094	-0.156621	NA
YCR065W	HCM1	5.75989	-0.0122669	NA	6.06126	0.0191047	NA	6.03548	0.00617881	NA
YCR066W	RAD18	3.99334	-0.213128	-0.034	3.99087	0.0184894	NA	4.0196	-0.103868	NA
YCR068W	ATG15	1.71895	-0.142111	NA	2.22795	-0.426372	NA	1.30044	-0.161468	NA
YCR069W	CPR4	6.76993	0.00348923	NA	6.88833	0.0095329	NA	6.83826	0.012619	NA
YCR077C	PAT1	6.75889	-0.0367321	NA	6.31754	-0.015138	NA	6.79837	-0.0194493	NA
YCR083W	TRX3	5.26011	0.0896509	NA	5.34191	-0.0185272	NA	5.53253	-0.0609304	NA
YCR084C	TUP1	7.17406	-0.135835	-0.063	7.83202	-0.0288122	NA	7.54596	-0.070493	NA
YCR091W	KIN82	2.87636	-0.0523639	NA	2.52107	-0.0885588	NA	2.63692	-0.0409677	NA
YCR092C	MSH3	5.33494	-0.0181509	NA	5.4483	-0.0138288	NA	5.23489	0.0222719	NA
YCR094W	CDC50	6.49671	-0.167315	-0.072	6.16532	-0.0251731	NA	6.57796	-0.0324045	NA
YCR102C		3.14663	0.0235857	NA	3.06155	-0.00725083	NA	3.53201	-0.102818	NA
YDL002C	NHP10	6.86063	-0.13535	-0.055	7.00157	-0.00802187	NA	6.99949	-0.0880871	NA
YDL006W	PTC1	5.91388	-0.00517937	NA	5.84239	0.0583755	NA	6.06454	-0.00481333	NA
YDL010W	GRX6	5.50177	-0.048819	NA	5.40881	0.00909611	NA	5.56337	-0.0803561	NA
YDL012C		8.02086	0.0150177	NA	7.86616	-0.0130276	NA	8.05208	0.0144846	NA
YDL014W	NOP1	9.02878	-0.0178632	NA	8.3173	0.00750047	NA	9.05807	0.00048954	NA
YDL018C	ERP3	6.76094	-0.136529	-0.052	6.42052	-0.0369272	NA	6.71389	-0.0704102	NA
YDL019C	OSH2	5.75785	-0.0620693	NA	5.32782	0.183152	NA	5.72279	-0.0251412	NA
YDL021W	GPM2	7.37858	-0.021909	NA	6.67269	0.026572	NA	7.22348	-0.0244653	NA
YDL022W	GPD1	7.81471	-0.0791964	NA	8.12508	-0.142172	NA	7.93264	-0.0647036	NA
YDL024C	DIA3	4.05246	-0.102448	NA	4.47886	0.0351184	NA	4.05257	-0.0180254	NA
YDL025C	RTK1	5.42087	-0.058449	NA	5.4416	-0.0117839	NA	5.5367	-0.0431701	NA
YDL026W		3.44733	0.00664201	NA	4.48064	0.065961	NA	4.12471	-0.0777774	NA
YDL027C		6.11697	-0.088566	-0.02	7.18277	0.0522952	NA	6.37924	-0.0236938	NA
YDL029W	ARP2	6.67951	-0.186121	-0.07	6.31223	-0.203561	NA	6.51541	-0.0979314	NA
YDL033C	SLM3	4.21205	0.0377998	NA	4.10458	-0.174935	NA	4.38465	-0.0287743	NA
YDL036C	PUS9	4.3669	0.150083	NA	4.24195	0.178397	NA	3.73918	-0.00707595	NA
YDL042C	SIR2	4.63367	0.0311649	NA	5.07165	0.0465462	NA	4.97068	0.0364918	NA
YDL043C	PRP11	5.40655	-0.134907	-0.031	5.27294	-0.0522641	NA	5.65466	0.0281558	NA
YDL047W	SIT4	6.38486	-0.145961	-0.032	6.88256	0.0164649	NA	6.53822	-0.117501	NA
YDL051W	LHP1	7.15999	-0.0463513	-0.006	7.3908	-0.0261186	NA	7.02464	-0.0312607	NA
YDL052C	SLC1	7.79283	-0.0170124	-0.003	7.7738	-0.0110279	NA	7.627	-0.00885081	NA
YDL053C	PBP4	7.0834	0.00578841	NA	6.93232	0.048114	NA	6.96752	-0.040531	NA
YDL055C	PSA1	10.2625	-0.0580188	NA	9.96714	0.0209294	NA	10.4206	-0.0897513	NA
YDL057W		4.57147	0.0241029	NA	5.11951	-0.0549575	NA	4.74554	0.0126474	NA
YDL061C	RPS29B	9.0841	0.0735256	0.002	8.77804	-0.106253	NA	8.99484	0.0586641	NA
YDL063C	SYO1	6.15301	-0.0252569	NA	6.33802	-0.0209037	NA	6.29421	-0.0194388	NA
YDL067C	COX9	7.18578	0.0145991	NA	7.36746	0.0296557	NA	7.6188	0.00281953	NA
YDL070W	BDF2	7.9922	-0.126754	-0.046	8.13742	0.0596829	NA	8.29423	-0.0999985	NA
YDL072C	YET3	7.80872	-0.00649026	NA	8.23679	0.0388359	NA	7.66483	0.0260795	NA
YDL073W		6.16356	-0.0363819	NA	5.73038	0.139862	NA	6.20765	-0.0307073	NA
YDL076C	RXT3	5.72179	-0.27782	-0.131	6.17534	-0.216692	NA	5.85487	-0.12356	NA
YDL077C	VAM6	5.79838	-0.0516101	-0.004	4.96411	0.112937	NA	5.80078	-0.0212157	NA
YDL078C	MDH3	5.99457	0.0375189	NA	6.06354	0.0135204	NA	5.89351	0.00677798	NA
YDL081C	RPP1A	10.9443	-0.000854199	NA	10.8836	0.0018279	NA	10.977	-0.000914826	NA
YDL082W	RPL13A	8.87463	0.00557625	NA	8.79104	0.0678999	NA	8.65415	-0.0283277	NA
YDL083C	RPS16B	10.4298	-0.00698219	NA	10.1107	0.0300961	NA	10.4161	-0.00418014	NA
YDL084W	SUB2	8.02678	0.0127647	NA	7.4215	-0.00252435	NA	7.9304	0.0213966	NA
YDL085C-A		5.83913	-0.145858	-0.031	5.55366	-0.0169453	NA	5.66725	-0.0963685	NA
YDL086C-A		3.23221	-0.0730677	NA	3.58393	-0.00857193	NA	3.34011	-0.066312	NA
YDL086W		7.66839	-0.0229558	NA	8.12899	0.0401937	NA	7.92541	-0.00683398	NA
YDL088C	ASM4	5.94645	-0.0682875	NA	5.90376	-0.0477995	NA	5.98827	-0.0663625	NA
YDL090C	RAM1	5.26736	-0.0170091	NA	4.87914	-0.0176599	NA	4.97317	0.0101994	NA
YDL093W	PMT5	6.78435	-0.0270854	NA	7.26047	0.00951193	NA	6.87403	-0.0197074	NA
YDL095W	PMT1	8.7054	-0.0232642	NA	8.33094	0.0559466	NA	8.63586	-0.00793229	NA
YDL102W	POL3	6.28746	0.0152707	NA	5.90793	-0.00319589	NA	6.32726	0.0151312	NA
YDL103C	QRI1	5.99758	-0.0347948	NA	5.56169	0.0707222	NA	5.99429	-0.0100647	NA
YDL105W	NSE4	3.78166	0.000369304	NA	3.93223	0.0618993	NA	3.56324	-0.00858014	NA
YDL106C	PHO2	5.25983	-0.227482	-0.087	5.70854	-0.0441419	NA	5.32779	-0.116024	NA
YDL110C	TMA17	6.87923	-0.0115277	NA	7.2097	-0.0333379	NA	7.20915	-0.020416	NA
YDL111C	RRP42	7.63481	-0.0110162	NA	7.35989	0.0155832	NA	7.71934	-0.00704825	NA
YDL112W	TRM3	6.42407	0.00196361	NA	6.12321	0.0349992	NA	6.38153	0.011065	NA
YDL119C		5.12324	-0.076813	NA	5.43678	-0.0808358	NA	5.35062	-0.054111	NA
YDL120W	YFH1	7.02238	-0.156105	-0.049	7.00057	-0.129261	NA	7.16332	-0.0620074	NA
YDL121C		5.93466	-0.0740924	NA	5.99529	0.180058	NA	6.07595	0.0316669	NA
YDL126C	CDC48	9.21482	-0.00225853	NA	9.13638	0.00249499	NA	9.11214	-0.00228958	NA
YDL128W	VCX1	7.3597	-0.059464	NA	7.26769	0.012172	NA	7.22131	-0.0183665	NA
YDL130W-A	STF1	7.80801	0.0143274	NA	7.28662	0.0876124	NA	7.78814	0.00625462	NA
YDL131W	LYS21	7.69999	-0.00330183	NA	7.65293	0.0104672	NA	7.68293	-0.00518184	NA
YDL135C	RDI1	7.2317	-0.109456	-0.016	7.14973	0.0488519	NA	7.3475	0.0956145	NA
YDL136W	RPL35B	8.85191	-0.0361619	-0.007	8.47783	0.026547	NA	8.61543	0.00164491	NA
YDL137W	ARF2	9.25959	-0.0139057	NA	8.7713	0.0201006	NA	9.16453	-0.027576	NA
YDL141W	BPL1	5.38955	-0.198079	-0.055	5.46467	0.135681	NA	5.40745	-0.139567	NA
YDL142C	CRD1	4.84956	-0.0546435	NA	4.72286	-0.187985	NA	4.9327	-0.0506633	NA
YDL143W	CCT4	7.90348	-0.000159106	NA	7.9567	0.0284465	NA	8.07914	0.00233388	NA
YDL145C	COP1	8.29519	-0.0613659	-0.02	8.18605	-0.0085777	NA	8.23813	-0.0705993	NA
YDL146W	LDB17	5.66774	-0.291311	-0.143	6.03188	0.121801	NA	5.7997	0.087161	NA
YDL147W	RPN5	7.98325	-0.0107569	-0.002	7.62791	0.0240022	NA	8.06825	-0.00710158	NA
YDL148C	NOP14	6.16558	-0.031751	NA	5.92445	0.123869	NA	6.3854	-0.0236908	NA
YDL154W	MSH5	3.66353	-0.0341112	NA	3.90442	0.210505	NA	3.79482	0.0406141	NA
YDL155W	CLB3	5.91088	0.0615328	NA	6.12382	0.010128	NA	6.00294	0.0370499	NA
YDL160C	DHH1	3.03741	0.0517956	NA	2.88446	0.0982821	NA	3.0855	-0.0082446	NA
YDL160C-A	MHF2	5.17607	-0.00682041	NA	4.85897	0.0619595	NA	5.16193	-0.0440965	NA
YDL161W	ENT1	5.59671	-0.0497854	NA	5.53074	0.0532667	NA	5.64198	-0.0524637	NA
YDL164C	CDC9	6.14733	0.033783	NA	6.56027	0.160798	NA	6.26653	-0.0120586	NA
YDL165W	CDC36	6.95139	0.0321162	NA	6.69534	0.0544096	NA	6.97945	-0.0120922	NA
YDL167C	NRP1	6.57713	-0.0582462	NA	6.32131	-0.0641421	NA	6.8101	0.0124852	NA
YDL168W	SFA1	7.38124	-0.154484	-0.056	7.03299	-0.175408	NA	7.4365	-0.0794938	NA
YDL170W	UGA3	5.70395	0.0284481	NA	6.05906	0.0275664	NA	5.87471	0.0115874	NA
YDL175C	AIR2	5.38324	-0.0900859	NA	5.61339	0.17609	NA	5.48098	0.0984892	NA
YDL179W	PCL9	5.26558	-0.0510208	NA	5.60826	-0.0235748	NA	5.37506	-0.0521157	NA
YDL180W		5.92478	-0.013985	NA	5.91195	0.0833386	NA	5.98913	-0.0187341	NA
YDL181W	INH1	7.78278	-0.0115193	NA	8.22774	0.00794027	NA	8.30953	0.0152686	NA
YDL183C		5.27145	-0.0857784	NA	5.75209	0.0502485	NA	5.26959	-0.221317	NA
YDL184C	RPL41A	10.622	-0.000152437	NA	10.3151	0.0038341	NA	10.5747	0.00177319	NA
YDL188C	PPH22	7.30459	-0.0737141	NA	7.59134	0.033929	NA	7.13661	0.00697165	NA
YDL190C	UFD2	6.40161	-0.00720651	NA	6.22219	0.0102072	NA	6.35143	0.00099365	NA
YDL192W	ARF1	10.3475	-0.171392	-0.087	9.68204	-0.0582781	NA	10.3509	-0.0714447	NA
YDL194W	SNF3	4.38161	-0.119314	NA	4.68399	0.187722	NA	4.76796	0.0108142	NA
YDL197C	ASF2	6.50712	-0.0903162	NA	6.88504	-0.178403	NA	6.62929	-0.0865407	NA
YDL202W	MRPL11	6.66556	-0.00349079	NA	6.80905	-0.00468178	NA	6.8429	-0.00913936	NA
YDL203C	ACK1	4.82455	-0.0135426	NA	5.04755	-0.0231799	NA	4.911	-0.0291094	NA
YDL204W	RTN2	5.72726	0.0393286	NA	5.83664	-0.249746	NA	5.77991	-0.0368515	NA
YDL205C	HEM3	6.58998	-0.0480719	NA	6.45293	5.90333e-05	NA	6.86185	0.0337347	NA
YDL206W		4.7716	0.082581	0.006	5.16466	0.0214339	NA	4.90479	0.0571913	NA
YDL208W	NHP2	8.48516	-0.00433737	NA	8.50225	0.00390241	NA	8.48155	-0.00451876	NA
YDL211C		4.7095	0.0332243	NA	4.88381	-0.135203	NA	4.7748	0.0848125	NA
YDL215C	GDH2	6.16112	-0.0268569	NA	6.19044	0.0476876	NA	5.92315	-0.0450424	NA
YDL217C	TIM22	6.02427	-0.0959232	NA	5.71167	-0.0815861	NA	5.98973	-0.0456073	NA
YDL219W	DTD1	7.52444	-0.150849	-0.047	7.25756	0.0720956	NA	7.39439	0.00284476	NA
YDL222C	FMP45	5.85576	-0.0153589	NA	6.08417	-0.0645032	NA	5.98815	-0.0208119	NA
YDL224C	WHI4	6.50248	-0.0551518	NA	6.49854	-0.181451	NA	6.51277	-0.048635	NA
YDL225W	SHS1	7.01908	0.0452551	NA	6.85359	-0.00283931	NA	6.95261	0.00650293	NA
YDL226C	GCS1	7.26249	-0.035326	NA	7.54869	0.0905425	NA	7.25259	0.00216908	NA
YDL230W	PTP1	4.37288	-0.0509442	NA	4.77086	-0.0335973	NA	4.53927	-0.0433899	NA
YDL231C	BRE4	4.73023	-0.0749377	NA	4.39076	-0.0126537	NA	4.91626	0.0353241	NA
YDL234C	GYP7	5.61188	-0.110687	-0.004	5.77251	0.0212502	NA	5.24582	-0.115451	NA
YDL237W	AIM6	8.0528	-0.0367237	NA	7.19443	-0.0203318	NA	8.06919	0.00310703	NA
YDL240W	LRG1	4.89743	0.0446261	NA	4.7138	0.0552748	NA	4.88598	0.214197	NA
YDL241W		5.21027	-0.0977535	NA	4.33229	-0.235785	NA	4.73356	-0.074043	NA
YDL243C	AAD4	4.66861	-0.00683723	NA	5.39516	-0.0853117	NA	5.1865	-0.00408575	NA
YDL244W	THI13	2.49843	0.134234	NA	3.05509	0.258546	NA	2.58409	0.225229	NA
YDR001C	NTH1	7.91681	-0.00391451	NA	8.15619	-0.00379853	NA	7.78209	-0.00763438	NA
YDR003W-A		5.75988	0.00743093	NA	6.20473	-0.0917389	NA	6.12058	0.00256907	NA
YDR004W	RAD57	5.55639	0.030662	NA	5.29024	0.039882	NA	5.77432	0.00227827	NA
YDR007W	TRP1	5.06565	-0.10439	-0.032	4.42002	0.161658	NA	5.09893	-0.0425217	NA
YDR011W	SNQ2	7.70862	-0.0497655	-0.015	7.2986	-0.0502172	NA	7.82119	-0.00839517	NA
YDR016C	DAD1	5.63229	0.0176033	NA	5.46721	0.146282	NA	5.77165	0.0970845	NA
YDR017C	KCS1	6.70254	0.00260983	NA	6.26766	0.00138905	NA	6.56964	-0.0135878	NA
YDR022C	ATG31	5.05584	-0.0175184	-0.003	5.65124	0.0102049	NA	5.56349	0.00585564	NA
YDR026C	NSI1	5.98056	-0.263286	-0.124	6.06435	-0.0974182	NA	6.23518	-0.213123	NA
YDR030C	RAD28	3.73125	-0.143988	NA	3.26523	-0.139605	NA	3.69653	-0.250621	NA
YDR031W	MIX14	5.40476	0.0389951	NA	5.44853	0.151042	NA	5.52288	0.130256	NA
YDR032C	PST2	9.1871	0.00437712	NA	9.08996	0.0136051	NA	9.13367	0.00718359	NA
YDR033W	MRH1	6.37844	-0.0444924	NA	6.32955	0.00453978	NA	6.30827	0.046905	NA
YDR034C	LYS14	5.76214	-0.031419	NA	5.43919	0.102807	NA	5.7215	-0.0555577	NA
YDR034C-D		4.69429	0.00891239	NA	5.09026	0.0520625	NA	4.73859	-0.0945608	NA
YDR034W-B		5.0624	-0.0500524	NA	5.87611	-0.0802818	NA	5.00328	0.0190181	NA
YDR035W	ARO3	6.07554	-0.143668	-0.028	6.50939	-0.145919	NA	6.01109	0.0210275	NA
YDR039C	ENA2	4.68676	0.00112719	NA	4.52785	0.0462798	NA	4.44353	0.00148722	NA
YDR045C	RPC11	7.41761	-0.177197	-0.102	7.12843	-0.00954708	NA	7.45468	-0.0698103	NA
YDR047W	HEM12	6.86811	-0.0156023	NA	6.3806	0.0563452	NA	7.15869	-0.0162303	NA
YDR050C	TPI1	11.4765	-0.000193724	NA	11.4029	0.00569385	NA	11.2299	0.000329386	NA
YDR055W	PST1	7.71784	-0.000332515	NA	8.76642	0.00743554	NA	7.5898	-0.00191605	NA
YDR056C		5.7942	-0.0666755	NA	5.58199	-0.0986573	NA	5.75915	-0.038597	NA
YDR057W	YOS9	4.25676	-0.0849394	NA	4.78428	0.0267043	NA	4.51825	0.0440881	NA
YDR062W	LCB2	7.50523	-0.011577	NA	7.2956	0.0519161	NA	7.49678	-0.0199012	NA
YDR066C	RTR2	4.80111	-0.0351821	NA	4.58802	0.0413844	NA	4.79548	-0.039079	NA
YDR068W	DOS2	6.43015	-0.0364925	NA	6.32004	-0.0116575	NA	6.34348	-0.0131631	NA
YDR069C	DOA4	6.03918	-0.0675482	NA	6.15599	0.00950271	NA	6.03085	-0.0128601	NA
YDR077W	SED1	11.9411	1.89456e-07	NA	12.6263	0.000684761	NA	11.8814	-0.00823686	NA
YDR079C-A	TFB5	6.91081	-0.020094	NA	6.05307	-0.0799658	NA	6.9151	-0.0088538	NA
YDR079W	PET100	6.68817	-0.0545976	NA	6.61696	-0.0691565	NA	6.92545	0.0240432	NA
YDR080W	VPS41	6.12342	0.0899111	NA	5.51285	0.269851	NA	6.10086	0.0281974	NA
YDR081C	PDC2	5.58751	-0.0876364	-0.026	5.83733	-0.0354663	NA	5.6705	-0.0840155	NA
YDR084C	TVP23	5.89185	0.000888636	NA	5.67221	0.304793	NA	5.86503	-0.0037406	NA
YDR085C	AFR1	5.75824	-0.011442	NA	5.96181	0.0123064	NA	6.01346	0.000158136	NA
YDR086C	SSS1	9.24611	-0.00917498	NA	9.23473	0.0262921	NA	9.40099	0.00671778	NA
YDR089W		6.93182	0.00165027	NA	6.42225	0.0217217	NA	6.78326	-0.0165849	NA
YDR090C		5.74528	-0.0903078	-0.033	6.0306	-0.0209294	NA	6.01234	-0.0557195	NA
YDR091C	RLI1	7.40911	-0.0427565	-0.018	7.63998	-0.0194202	NA	7.48634	-0.023448	NA
YDR094W		7.95341	0.0701635	0.025	7.88285	-0.012361	NA	7.85427	0.0288748	NA
YDR096W	GIS1	4.92026	-0.093516	NA	5.08368	0.293438	NA	5.23362	0.0571079	NA
YDR097C	MSH6	6.20492	0.000601037	NA	5.30424	0.079738	NA	5.99545	0.00620559	NA
YDR098C	GRX3	7.60175	-0.0644385	-0.016	7.1683	0.0392218	NA	7.56195	0.00350998	NA
YDR098C-B		4.81747	-0.0610095	NA	4.90166	0.058872	NA	4.53008	-0.0977736	NA
YDR099W	BMH2	8.35126	0.0302878	0.004	7.52461	0.083287	NA	8.2155	0.0316663	NA
YDR100W	TVP15	6.22168	-0.229457	-0.103	5.89233	-0.146664	NA	5.94604	-0.103577	NA
YDR103W	STE5	6.67077	0.0225784	NA	6.46115	0.0503602	NA	6.67167	0.0381492	NA
YDR104C	SPO71	5.35036	0.0604137	NA	5.09611	0.101391	NA	5.36968	0.0353138	NA
YDR107C	TMN2	4.81284	-0.273434	-0.114	3.62596	0.0117094	NA	3.85907	-0.0486723	NA
YDR110W	FOB1	4.63822	-0.00288073	NA	4.44565	0.0179148	NA	4.71187	-0.0547961	NA
YDR111C	ALT2	4.62528	0.0157134	NA	4.34618	0.169212	NA	4.49011	-0.0117161	NA
YDR115W		6.63017	-0.179789	-0.067	7.11658	-0.040392	NA	6.81094	-0.133763	NA
YDR117C	TMA64	5.1051	-0.164746	-0.048	4.63461	0.0710797	NA	5.18149	-0.0426967	NA
YDR118W-A		4.1504	-0.254038	-0.072	4.24785	-0.0844274	NA	4.54973	-0.22848	NA
YDR120C	TRM1	7.09233	0.00835665	NA	6.5649	0.0651301	NA	7.18678	0.0154481	NA
YDR127W	ARO1	7.35314	-0.135533	-0.036	6.91842	-0.166769	NA	7.16754	-0.183128	NA
YDR128W	MTC5	6.31806	0.0015753	NA	6.22025	-0.103776	NA	6.44941	-0.0497712	NA
YDR129C	SAC6	8.10503	-0.00115461	NA	8.13423	0.0175416	NA	8.02514	-0.000698246	NA
YDR130C	FIN1	4.77661	0.0267292	NA	4.82691	0.00823391	NA	5.11777	0.0659194	NA
YDR132C		4.92396	-0.0791487	NA	4.95001	0.00115474	NA	5.33947	-0.0318907	NA
YDR133C		10.9161	-0.0111296	NA	10.374	-0.25232	NA	11.2199	0.000750037	NA
YDR140W	MTQ2	6.07469	0.00857133	NA	5.98705	0.142226	NA	6.07848	0.10438	NA
YDR141C	DOP1	6.89433	-0.148565	-0.047	6.40691	0.0197679	NA	6.57461	-0.0560651	NA
YDR142C	PEX7	5.36441	-0.155809	-0.025	5.45715	-0.161425	NA	5.3132	-0.199291	NA
YDR144C	MKC7	7.82332	-0.0383616	NA	7.34662	0.087496	NA	7.66437	-0.0287471	NA
YDR145W	TAF12	6.68452	0.0527034	NA	6.30551	0.142275	NA	6.7055	0.0111651	NA
YDR146C	SWI5	5.86448	-0.0298757	NA	6.29518	0.0735682	NA	5.99639	-0.0171445	NA
YDR147W	EKI1	5.25846	-0.111941	-0.045	5.32684	-0.0997721	NA	5.32877	-0.10566	NA
YDR148C	KGD2	7.2669	-0.184871	-0.084	7.31073	0.257576	NA	7.38747	-0.0735999	NA
YDR151C	CTH1	6.25709	-0.0764064	NA	6.54631	-0.133128	NA	6.15618	-0.0772408	NA
YDR153C	ENT5	5.74031	0.0124735	NA	6.08014	-0.0110562	NA	5.83819	0.0034659	NA
YDR161W		5.99754	-0.0283323	NA	5.11014	0.211519	NA	6.00726	0.016335	NA
YDR168W	CDC37	7.21437	-0.0520855	-0.014	7.6235	-0.0322511	NA	7.19994	-0.00683322	NA
YDR169C	STB3	6.23393	-0.0614782	NA	6.75211	0.00864827	NA	6.57996	-0.0493373	NA
YDR172W	SUP35	7.83603	-0.119391	-0.042	8.02146	0.124012	NA	7.66581	0.0460237	NA
YDR174W	HMO1	7.30594	-0.0285347	NA	7.48284	0.0168181	NA	7.44569	-0.0157435	NA
YDR175C	RSM24	6.60643	-0.016385	NA	6.69824	-0.0373223	NA	6.94435	-0.0225578	NA
YDR177W	UBC1	6.68194	-0.0690057	NA	5.95912	-0.218235	NA	6.73675	-0.0887614	NA
YDR178W	SDH4	6.88066	-0.0279578	NA	7.5743	0.0388156	NA	7.2467	-0.0181741	NA
YDR181C	SAS4	4.64675	0.062593	NA	4.6905	-0.000431359	NA	4.99154	0.00128169	NA
YDR183C-A		5.27971	-0.0068066	NA	5.58707	0.0107808	NA	5.53034	-0.0175498	NA
YDR183W	PLP1	5.62833	-0.0177611	NA	5.77657	-0.02242	NA	5.90836	-0.0232658	NA
YDR185C	UPS3	4.22883	-0.0914504	NA	4.14338	0.0167477	NA	4.06539	-0.0297585	NA
YDR188W	CCT6	7.37557	-0.0264035	NA	7.38302	0.0302932	NA	7.37647	-0.00169806	NA
YDR190C	RVB1	7.49854	-0.120328	-0.038	7.4666	0.111867	NA	7.61149	-0.0184704	NA
YDR194W-A		1.55203	0.130612	NA	1.77741	-0.208859	NA	1.7167	0.0955191	NA
YDR196C	CAB5	6.56023	0.00511277	NA	6.47819	0.0159851	NA	6.81626	0.00525792	NA
YDR197W	CBS2	4.6636	-0.149391	NA	4.84577	-0.169751	NA	4.97079	0.0338303	NA
YDR198C	RKM2	5.38352	-0.245905	-0.104	5.28943	-0.0707766	NA	5.5739	-0.170625	NA
YDR201W	SPC19	4.24329	-0.0919195	NA	4.20828	0.0660478	NA	4.47541	-0.0270191	NA
YDR206W	EBS1	4.49597	-0.136901	-0.005	4.41456	-0.0256887	NA	4.59227	-0.113834	NA
YDR207C	UME6	4.92193	-0.1032	NA	4.95721	0.0564503	NA	5.21195	-0.0016025	NA
YDR210C-D		4.84251	-0.049015	NA	4.93645	0.025367	NA	4.67089	-0.127252	NA
YDR210W		7.51018	-0.117959	-0.028	7.43325	-0.0100564	NA	7.66475	-0.0874112	NA
YDR212W	TCP1	7.17434	0.00706027	NA	6.90728	0.0129559	NA	6.98658	0.0195856	NA
YDR213W	UPC2	4.06716	-0.145138	NA	2.99292	-0.279407	NA	3.14293	-0.154862	NA
YDR214W	AHA1	10.9349	-0.0344361	NA	10.4909	-0.0736412	NA	11.0009	-0.112996	NA
YDR221W	GTB1	5.3183	0.0780883	NA	4.51585	-0.0157947	NA	5.13024	-0.0247907	NA
YDR223W	CRF1	2.94477	-0.142092	NA	2.99483	-0.0722686	NA	3.23377	-0.133945	NA
YDR225W	HTA1	9.20721	0.024497	NA	9.00012	-0.0238747	NA	9.48182	0.00310859	NA
YDR227W	SIR4	5.28215	-0.0751364	-0.023	5.41738	0.0275859	NA	5.43136	-0.019868	NA
YDR228C	PCF11	6.51325	0.0105367	NA	6.33125	0.0432877	NA	6.36613	0.00264437	NA
YDR231C	COX20	5.70625	-0.130375	-0.016	6.20607	-0.207547	NA	6.05796	-0.112917	NA
YDR232W	HEM1	7.13624	-0.0997848	-0.01	7.06507	0.158828	NA	7.06481	0.0152816	NA
YDR233C	RTN1	9.69469	0.009548	NA	9.77301	0.0165228	NA	9.80553	0.000734041	NA
YDR237W	MRPL7	6.07516	0.00281273	NA	6.2797	-0.0309602	NA	6.36093	-0.00234502	NA
YDR238C	SEC26	8.18931	-0.0638892	NA	7.8704	0.076746	NA	8.13855	0.000300095	NA
YDR242W	AMD2	4.46025	-0.0195086	NA	5.02803	0.0527486	NA	4.8359	0.106314	NA
YDR244W	PEX5	5.51484	-0.0179746	NA	5.41158	-0.166443	NA	5.44469	-0.110135	NA
YDR246W	TRS23	6.13998	0.0158204	NA	6.25802	0.054455	NA	6.22019	0.0091288	NA
YDR249C		4.97386	-0.0202713	NA	4.9376	0.102658	NA	4.90718	0.0028479	NA
YDR259C	YAP6	4.46289	-0.209029	-0.045	4.39629	0.333101	NA	4.4071	0.197904	NA
YDR261C-D		4.78534	-0.0585012	NA	4.94925	-0.00222703	NA	4.62096	-0.180131	NA
YDR261W-B		4.40505	-0.150194	NA	4.99202	0.00846454	NA	4.72845	-0.117981	NA
YDR263C	DIN7	4.26117	-0.0826201	NA	4.50666	0.168763	NA	4.67601	-0.01037	NA
YDR264C	AKR1	7.56221	-0.0101761	NA	7.3753	-0.00237325	NA	7.37468	-0.0296305	NA
YDR267C	CIA1	4.71274	-0.0767758	NA	4.20301	0.139901	NA	4.71305	-0.0504984	NA
YDR273W	DON1	3.93344	0.0296989	NA	4.49059	0.0609997	NA	4.36728	-0.0935296	NA
YDR276C	PMP3	9.50389	-0.0309998	-0.006	9.47805	0.0377585	NA	9.51626	0.0290646	NA
YDR277C	MTH1	5.85651	-2.54539e-05	NA	5.92735	0.0988994	NA	6.45434	-0.0154552	NA
YDR281C	PHM6	2.59239	-0.12389	NA	2.8623	0.00169463	NA	3.62055	-0.0256117	NA
YDR282C		5.7002	-0.0826112	NA	5.64143	0.0683263	NA	5.88323	-0.016988	NA
YDR288W	NSE3	5.79024	-0.145062	-0.025	5.68276	-0.0167308	NA	5.95604	-0.145696	NA
YDR289C	RTT103	5.95367	-0.156848	-0.044	6.15885	-0.117337	NA	5.91736	-0.0982237	NA
YDR291W	HRQ1	4.70052	-0.159424	-0.013	4.82663	0.113957	NA	4.80702	-0.110289	NA
YDR292C	SRP101	6.25339	0.0115471	NA	6.04478	0.0177385	NA	6.36391	0.0251185	NA
YDR293C	SSD1	7.43492	-0.0642781	NA	7.78806	0.0430344	NA	7.2849	-0.0575669	NA
YDR295C	HDA2	6.50703	0.0130461	NA	6.54893	0.0471895	NA	6.37971	-0.00232282	NA
YDR298C	ATP5	7.49511	-0.00335576	NA	7.88609	0.0105853	NA	8.06989	-0.00156267	NA
YDR299W	BFR2	8.0292	-0.0399614	-0.018	7.83642	-0.0170666	NA	8.15225	-0.0428221	NA
YDR301W	CFT1	6.29037	-0.0312534	NA	6.39634	0.0616866	NA	6.11206	-0.0309204	NA
YDR302W	GPI11	5.22569	-0.0286744	NA	4.99715	0.171188	NA	5.34082	-0.00607575	NA
YDR306C		4.29763	-0.0626174	NA	4.33066	-0.168139	NA	4.33771	-0.169578	NA
YDR309C	GIC2	7.51533	-0.0381734	NA	7.39923	0.197639	NA	7.52221	0.0122656	NA
YDR310C	SUM1	7.18633	-0.0341504	NA	7.2108	0.144075	NA	7.29572	-0.121663	NA
YDR312W	SSF2	6.38611	-0.12458	-0.022	6.55091	0.0129255	NA	6.58795	-0.121181	NA
YDR313C	PIB1	4.47791	-0.0203873	NA	4.89034	0.00415307	NA	4.72154	0.0291235	NA
YDR317W	HIM1	3.88287	0.116155	NA	3.82792	-0.0494989	NA	3.92452	0.0703223	NA
YDR321W	ASP1	7.7818	-0.0152329	NA	7.18442	0.0119199	NA	7.56088	-0.00326806	NA
YDR322C-A	TIM11	7.61876	-0.0105399	NA	8.2253	0.0163679	NA	8.05077	-0.0214794	NA
YDR325W	YCG1	5.16181	-0.1303	-0.017	4.96237	0.0130815	NA	5.32355	-0.120373	NA
YDR326C	YSP2	6.25335	-0.00482603	NA	6.01595	0.0295252	NA	6.03425	-0.02482	NA
YDR330W	UBX5	6.17995	-0.194174	-0.07	6.0048	-0.098998	NA	6.20101	-0.121919	NA
YDR333C	RQC1	6.94762	-0.00806869	NA	7.01279	0.015651	NA	7.08352	-0.00390695	NA
YDR335W	MSN5	6.80684	0.0145198	NA	6.2909	0.0292638	NA	6.74672	-0.0120917	NA
YDR337W	MRPS28	6.02483	0.0294388	NA	5.86285	0.140787	NA	6.1517	0.037779	NA
YDR338C		5.03552	-0.0547446	NA	4.88017	0.146815	NA	5.22447	-0.00569847	NA
YDR343C	HXT6	3.72085	-0.0491046	NA	4.5824	0.0541773	NA	4.57438	0.00269306	NA
YDR346C	SVF1	8.18837	-0.153278	-0.085	7.75746	-0.0664301	NA	8.42821	-0.0220913	NA
YDR348C	PAL1	6.379	-0.00296376	NA	6.79433	-0.0144228	NA	6.43375	0.00321081	NA
YDR349C	YPS7	6.55323	0.030634	NA	6.69245	0.0840719	NA	6.57363	0.0827946	NA
YDR352W	YPQ2	5.97139	-0.0716498	NA	6.38825	0.0326688	NA	6.12744	-0.0743794	NA
YDR353W	TRR1	8.64492	-0.0484763	-0.023	8.58875	0.00776132	NA	8.4598	-0.0161452	NA
YDR356W	SPC110	6.27256	-0.00992879	NA	5.89524	0.0667053	NA	6.39755	0.00231841	NA
YDR359C	EAF1	5.99745	0.00513125	NA	5.52316	0.139325	NA	6.15046	0.00717891	NA
YDR361C	BCP1	6.43412	-0.118174	-0.02	6.19756	-0.16001	NA	6.81469	-0.0123519	NA
YDR362C	TFC6	5.48653	-0.0722137	NA	5.51854	0.140347	NA	5.7094	0.00302509	NA
YDR363W	ESC2	3.57115	-0.0658297	NA	3.47116	-0.179983	NA	3.10876	-0.372795	-0.028
YDR363W-A	SEM1	7.86574	-0.168913	-0.069	7.76181	-0.0977272	NA	8.02543	-0.0686638	NA
YDR365W-B		5.48071	-0.10995	NA	4.71568	0.0179022	NA	4.37403	-0.150204	NA
YDR367W	KEI1	7.0146	0.000559726	NA	6.78958	0.0379068	NA	7.28622	-0.00171066	NA
YDR374W-A	WIP1	5.85657	-0.0435803	NA	5.6845	0.00784531	NA	6.00477	0.0102929	NA
YDR377W	ATP17	7.50943	-0.222414	-0.118	7.66804	-0.0471884	NA	7.99746	-0.0232551	NA
YDR378C	LSM6	7.75357	-0.082289	-0.016	7.28314	0.0757743	NA	7.68331	-0.0489436	NA
YDR379C-A	SDH6	5.84175	-0.0665887	NA	6.21882	-0.0538933	NA	5.64009	-0.0298714	NA
YDR381C-A		5.00507	0.0580798	NA	5.0514	0.0267076	NA	5.18143	0.0173037	NA
YDR381W	YRA1	7.23611	-0.192458	-0.087	7.44176	0.190314	NA	7.28695	-0.0457781	NA
YDR384C	ATO3	6.06905	-0.020381	NA	5.60192	0.016345	NA	5.7258	0.0380772	NA
YDR385W	EFT2	9.83802	0.0216649	NA	9.70609	0.0166775	NA	9.59293	-0.0280621	NA
YDR389W	SAC7	6.08553	0.0636631	NA	6.35846	-0.0581372	NA	6.16634	0.0363842	NA
YDR390C	UBA2	6.06386	-0.0257175	NA	5.90327	0.077963	NA	6.22915	-0.0397104	NA
YDR392W	SPT3	5.34746	0.0552887	NA	5.04048	0.0506974	NA	5.42549	0.00427194	NA
YDR397C	NCB2	6.35507	-0.0969197	-0.008	6.51605	-0.00049625	NA	6.67254	-0.18982	NA
YDR398W	UTP5	7.3649	0.0022535	NA	7.18905	0.00824169	NA	7.64233	-0.00450373	NA
YDR403W	DIT1	4.11933	0.0847828	NA	4.15108	0.158641	NA	4.12024	0.168026	NA
YDR404C	RPB7	7.04069	-0.00108064	NA	7.03941	-0.00145027	NA	7.03897	0.0152738	NA
YDR408C	ADE8	5.741	-0.296504	-0.152	5.41618	-0.329065	NA	5.3545	-0.186114	NA
YDR409W	SIZ1	5.62919	-0.103535	NA	5.91639	0.0784379	NA	5.58074	-0.0830453	NA
YDR410C	STE14	7.71947	0.0345338	NA	7.149	0.140848	NA	7.68706	0.0910902	NA
YDR411C	DFM1	7.42819	0.0184007	0.002	7.91543	-0.00537957	NA	7.69856	0.00997748	NA
YDR412W	RRP17	6.22065	0.0052429	NA	5.88004	0.0335148	NA	6.37946	0.000595157	NA
YDR415C		5.11924	-0.121379	-0.004	4.56713	0.121142	NA	4.68989	0.109221	NA
YDR419W	RAD30	5.24022	-0.115363	NA	5.19612	0.107692	NA	5.54415	-0.0886432	NA
YDR421W	ARO80	4.91353	-0.174237	-0.035	5.02421	-0.0108071	NA	5.01307	-0.0854232	NA
YDR422C	SIP1	5.76771	0.0137779	NA	6.01763	0.0150044	NA	5.875	-0.0065485	NA
YDR423C	CAD1	6.08989	-0.0254263	NA	5.58017	0.0232138	NA	5.71125	-0.00683808	NA
YDR426C		2.68858	0.0307566	NA	3.47248	0.266112	NA	3.41944	0.206833	NA
YDR428C	BNA7	5.89056	-0.0705691	NA	5.49554	-0.0142441	NA	6.04259	-0.0657259	NA
YDR432W/YDR433W	NPL3	11.2039	-0.111957	-0.043	10.6098	-0.122317	NA	10.8338	-0.122405	NA
YDR439W	LRS4	5.59822	0.0587767	NA	5.92616	-0.0332525	NA	5.76743	0.0636787	NA
YDR441C	APT2	7.1831	-0.217423	-0.105	7.59525	-0.110614	NA	7.36072	-0.0128037	NA
YDR447C	RPS17B	10.3629	0.0224375	0.006	9.82303	0.058181	NA	10.1893	0.0266936	NA
YDR448W	ADA2	4.97326	-0.0619695	NA	4.77991	0.0965311	NA	4.94729	-0.0894869	NA
YDR449C	UTP6	5.72072	-0.0907739	-0.031	5.64478	0.00707453	NA	5.76099	-0.0505355	NA
YDR450W	RPS18A	10.3793	-0.00493389	-0.001	10.1118	0.0139185	NA	10.2015	-0.00305542	NA
YDR452W	PPN1	7.2569	-0.133996	-0.033	7.08971	0.0350588	NA	7.30914	-0.0248244	NA
YDR456W	NHX1	6.53865	-0.0270673	-0.005	6.80227	-0.0146896	NA	6.88809	-0.0251767	NA
YDR457W	TOM1	7.39199	-0.0425827	-0.02	7.20558	-0.0084253	NA	7.23969	-0.0292534	NA
YDR458C	HEH2	5.03713	-0.0669314	NA	4.68432	0.0135902	NA	5.15505	-0.0819378	NA
YDR459C	PFA5	6.06847	-0.189127	-0.062	5.90258	-0.232874	NA	6.42694	-0.0553796	NA
YDR460W	TFB3	4.21418	-0.0193957	NA	4.25044	0.0674772	NA	4.57092	0.00182135	NA
YDR461C-A		7.57301	0.0638067	NA	7.48805	-0.163088	NA	7.71435	-0.0121503	NA
YDR461W	MFA1	5.91131	-0.00754654	NA	8.95272	-0.0269001	NA	7.89278	-0.0249963	NA
YDR466W	PKH3	6.20415	-0.0718773	NA	6.1277	0.0935749	NA	6.19943	-0.0453701	NA
YDR469W	SDC1	6.15052	-0.111959	NA	5.81983	-0.122957	NA	6.16746	0.00290519	NA
YDR471W	RPL27B	9.40129	0.00200858	NA	9.39957	0.025181	NA	9.24852	0.00380398	NA
YDR472W	TRS31	7.6996	-0.0428698	-0.016	5.86584	0.094886	NA	7.43033	-0.042939	NA
YDR473C	PRP3	4.86965	-0.137171	-0.016	5.08146	0.025705	NA	5.03471	-0.00305011	NA
YDR478W	SNM1	5.82122	-0.0327461	NA	5.31015	0.201423	NA	6.10108	-0.0455364	NA
YDR484W	VPS52	5.87478	-0.0442247	NA	5.65024	0.0925291	NA	5.93567	-0.0166029	NA
YDR486C	VPS60	5.77969	0.019476	NA	5.71967	0.0444456	NA	6.0043	-0.0135026	NA
YDR488C	PAC11	4.10268	-0.0417171	NA	4.59689	-0.252716	NA	4.36739	-0.0574238	NA
YDR490C	PKH1	6.7026	-0.0718789	NA	6.35452	0.0546267	NA	6.65991	0.0177019	NA
YDR493W	MZM1	4.3934	0.180355	0.035	4.26854	-0.0355608	NA	4.44581	0.134516	NA
YDR496C	PUF6	6.88761	-0.0450067	-0.016	6.80244	-0.0221748	NA	7.13774	-0.0375717	NA
YDR497C	ITR1	7.45396	-0.00379441	NA	7.34503	0.00644861	NA	7.73185	-0.00935294	NA
YDR500C	RPL37B	9.1005	0.0176781	NA	8.65979	0.0467107	NA	8.96493	0.0420586	NA
YDR502C	SAM2	8.10529	-0.0147159	NA	8.42843	0.00161113	NA	8.27684	-0.0125458	NA
YDR508C	GNP1	8.99695	-0.0675821	-0.007	9.30657	0.0814705	NA	9.1953	-0.0578655	NA
YDR510W	SMT3	8.98298	0.0240775	NA	8.70212	-0.0095513	NA	9.00009	0.00604696	NA
YDR511W	SDH7	6.34827	0.0107023	NA	6.63255	0.000583782	NA	6.59198	0.0155541	NA
YDR515W	SLF1	5.80499	0.0432659	0.006	5.90549	0.026554	NA	5.89829	0.0150999	NA
YDR524C	AGE1	5.92622	-0.100934	-0.019	6.29038	0.0411547	NA	6.29237	-0.0314365	NA
YDR524C-B		11.9261	-0.100156	-0.021	12.088	0.0247193	NA	11.9168	-0.156534	NA
YDR525W-A	SNA2	6.41017	-0.108072	-0.021	6.50552	-0.0459442	NA	6.33996	-0.038476	NA
YDR529C	QCR7	7.01615	0.0743019	0.021	7.37352	0.0519453	NA	7.60997	0.0524226	NA
YDR530C	APA2	5.4501	0.0555423	NA	5.21355	-0.0294289	NA	5.5984	-0.0024703	NA
YDR532C	KRE28	5.44879	0.0187829	NA	5.31953	0.0312161	NA	5.61605	0.0145813	NA
YDR533C	HSP31	9.22425	-0.0218896	NA	9.52874	-0.0300427	NA	9.32556	-0.0407808	NA
YDR538W	PAD1	5.94913	-0.0664097	-0.009	5.89379	-0.0909412	NA	5.56296	-0.0436919	NA
YDR539W	FDC1	6.80717	-0.201101	-0.107	6.48184	-0.0718907	NA	6.85005	-0.0900019	NA
YDR540C	IRC4	4.7907	-0.00121738	NA	5.27772	-0.118559	NA	5.24878	0.0361576	NA
YDR541C		6.46061	-0.0618219	-0.021	6.46784	-0.00444732	NA	6.33925	-0.0129314	NA
YDR544C		1.33808	-0.0919583	NA	NA	NA	NA	-0.428912	0.147898	NA
YEL001C	IRC22	8.11427	-0.0063404	NA	8.13869	-0.0366372	NA	7.96802	-0.00116034	NA
YEL002C	WBP1	7.24666	-0.0023422	NA	7.34368	0.0148395	NA	7.19156	0.018159	NA
YEL006W	YEA6	6.62012	-0.0774264	-0.014	6.7755	0.0151066	NA	6.99221	0.0358574	NA
YEL007W	MIT1	6.75881	-0.0858809	NA	6.9347	0.0462668	NA	6.97179	-0.0510552	NA
YEL008W		2.67361	-0.0952227	NA	1.90508	0.172029	NA	1.70095	0.384637	0.023
YEL013W	VAC8	6.31682	-0.110149	-0.02	5.84542	-0.192376	NA	6.2163	0.0946669	NA
YEL015W	EDC3	7.28602	-0.106362	-0.044	6.97326	-0.0350731	NA	7.40365	-0.11354	NA
YEL016C	NPP2	5.66622	0.00194496	NA	5.12566	0.0306544	NA	5.61374	-0.0036365	NA
YEL022W	GEA2	6.12196	-0.0541175	NA	5.64756	0.208803	NA	5.98077	-0.0112194	NA
YEL027W	VMA3	10.281	-0.0172438	NA	9.87891	-0.0347571	NA	10.1574	-0.00226326	NA
YEL028W		2.71555	0.0199338	NA	3.05993	0.144517	NA	2.70676	-0.0919068	NA
YEL029C	BUD16	5.68804	-0.245845	-0.113	5.38762	0.11881	NA	5.65354	-0.149822	NA
YEL030W	ECM10	4.81595	-0.0648309	NA	4.93174	0.126987	NA	5.32381	-0.019619	NA
YEL032W	MCM3	5.0824	0.108593	NA	4.53419	0.0314078	NA	5.05741	0.103797	NA
YEL037C	RAD23	8.47161	0.0227262	NA	8.19784	0.0848002	NA	8.51949	0.0187317	NA
YEL038W	UTR4	6.58661	-0.036444	NA	6.86574	-0.0151234	NA	6.74818	0.00835841	NA
YEL042W	GDA1	7.70192	-0.0392246	-0.005	7.26205	0.0673905	NA	7.77781	-0.0201488	NA
YEL044W	IES6	7.14362	0.063594	NA	6.80388	-0.0279455	NA	7.52254	0.00121532	NA
YEL050C	RML2	7.00844	-0.0846685	-0.002	7.23219	0.0984789	NA	7.03455	-0.0150691	NA
YEL054C	RPL12A	10.2023	-0.0984653	-0.02	9.20722	-0.0609632	NA	9.97186	-0.0413575	NA
YEL055C	POL5	6.51632	-0.0607161	NA	6.82797	-0.0599173	NA	6.59242	0.0432537	NA
YEL056W	HAT2	6.23067	-0.0132539	NA	5.83189	-0.042598	NA	6.07466	-0.0286691	NA
YEL058W	PCM1	8.85438	-0.00665833	NA	8.97982	-0.00758669	NA	9.00047	-0.00468466	NA
YEL060C	PRB1	7.64939	-0.106251	-0.028	8.68862	-0.0496682	NA	8.00887	-0.049083	NA
YEL061C	CIN8	5.30981	-0.326399	-0.166	4.86293	-0.214303	NA	5.44493	-0.288105	-0.019
YEL062W	NPR2	5.66422	-0.0122368	NA	5.79381	0.0454338	NA	5.83071	0.00854565	NA
YEL064C	AVT2	4.34916	-0.275211	-0.087	4.36217	-0.12061	NA	4.65986	-0.196064	NA
YEL066W	HPA3	7.08495	0.0066856	NA	7.7518	-0.00794179	NA	7.39743	-0.000441061	NA
YEL068C		7.50395	-0.00626582	NA	7.58676	0.0409649	NA	7.59685	0.00823514	NA
YEL071W	DLD3	8.5434	-0.00835453	NA	8.32868	0.0934631	NA	7.60758	-0.00230945	NA
YEL072W	RMD6	4.53211	-0.0987215	NA	4.87872	0.0607882	NA	4.59524	0.0394629	NA
YER001W	MNN1	7.65814	-0.198208	-0.087	7.38856	-0.0357088	NA	7.71125	-0.160122	NA
YER002W	NOP16	6.39373	0.0286526	NA	6.3281	0.0335328	NA	6.53392	0.0273402	NA
YER003C	PMI40	8.39083	-0.086359	-0.043	8.45489	-0.0687557	NA	8.35948	-0.046072	NA
YER006W	NUG1	7.25718	-0.0198301	-0.008	6.95543	-0.00166483	NA	7.04154	-0.0158818	NA
YER007C-A	TMA20	7.26389	-0.0230409	-0.007	7.1485	0.0268202	NA	7.12938	0.0227256	NA
YER007W	PAC2	5.16678	0.0225831	NA	4.91887	0.0425517	NA	5.49118	0.0156944	NA
YER011W	TIR1	4.74423	-0.0763219	NA	3.73525	-0.0688076	NA	3.6263	-0.184495	NA
YER020W	GPA2	6.46974	0.113647	0.005	6.68634	0.0813177	NA	6.77118	-0.0234596	NA
YER023W	PRO3	8.82922	-0.0451313	-0.011	8.76214	-0.0824032	NA	8.86761	-0.0468891	NA
YER026C	CHO1	7.87874	-0.0474656	-0.026	8.1224	-0.0125874	NA	7.90971	-0.0152152	NA
YER027C	GAL83	7.50373	-0.308619	-0.193	7.26469	-0.166117	NA	7.64645	-0.216811	NA
YER030W	CHZ1	7.88325	-0.0345217	-0.002	7.84567	0.00473336	NA	8.07572	-0.0373338	NA
YER031C	YPT31	8.5108	-0.00850414	NA	8.55839	-0.0470581	NA	8.57375	0.0382343	NA
YER032W	FIR1	5.31001	-0.089025	NA	5.64925	0.0859012	NA	5.53836	0.00762765	NA
YER033C	ZRG8	4.98037	-0.00801266	NA	4.71595	-0.0377928	NA	4.97709	-0.0303889	NA
YER035W	EDC2	7.68394	-0.0350029	NA	7.94423	-0.0132282	NA	7.61856	-0.0587789	NA
YER036C	ARB1	9.12995	0.002755	NA	9.02181	0.00261513	NA	9.02217	0.00261637	NA
YER037W	PHM8	6.86146	-0.00652884	NA	7.19397	0.106454	NA	7.1646	0.0345669	NA
YER042W	MXR1	6.99253	-0.00142023	NA	6.72851	0.0955109	NA	7.32834	-0.00886788	NA
YER045C	ACA1	5.82027	0.040099	NA	5.91645	0.17607	NA	6.15288	0.0662826	NA
YER047C	SAP1	4.7901	0.0137862	NA	4.71601	0.0498218	NA	4.61224	-0.0846041	NA
YER048W-A	ISD11	7.36533	-0.100578	-0.008	7.45555	0.0467971	NA	7.50297	0.0366185	NA
YER053C	PIC2	6.94953	-0.230289	-0.11	6.82552	0.155222	NA	7.23099	-0.157022	NA
YER053C-A		7.45819	0.0212174	NA	8.43669	0.114625	NA	7.82257	-0.0541335	NA
YER056C	FCY2	7.34187	-0.00217165	NA	8.04507	0.00163352	NA	7.48572	-0.000377701	NA
YER056C-A	RPL34A	9.40554	-0.00112859	NA	9.40885	0.00126127	NA	9.27688	0.000569512	NA
YER057C	HMF1	7.21956	-0.0113234	NA	7.25567	0.00456577	NA	7.144	-0.00827898	NA
YER060W	FCY21	4.73663	-0.194025	-0.059	4.53187	-0.0730395	NA	4.97439	-0.159263	NA
YER061C	CEM1	4.8587	0.0669848	NA	4.38937	0.13362	NA	4.79781	0.0217341	NA
YER063W	THO1	6.34138	0.00226983	NA	5.63966	-0.0695837	NA	6.32319	-0.0144894	NA
YER064C	VHR2	6.95423	-0.0278443	NA	7.10856	-0.00391854	NA	6.95919	-0.0933018	NA
YER070W	RNR1	8.16843	-0.000516602	NA	8.17956	0.0355492	NA	7.93484	-0.0317488	NA
YER071C	TDA2	6.9345	-0.149883	-0.063	7.02694	-0.119585	NA	7.46371	-0.0558866	NA
YER072W	VTC1	8.15628	0.00145134	NA	8.33503	0.0602176	NA	8.73215	0.00496361	NA
YER073W	ALD5	6.84998	-0.0369924	NA	6.80994	-0.0706098	NA	7.15769	-0.079077	NA
YER074W	RPS24A	9.53122	0.0107985	0.002	9.4482	0.0116255	NA	9.3206	0.0116485	NA
YER074W-A	YOS1	6.7043	-0.0203246	NA	6.89705	-0.0698152	NA	6.61606	0.0350477	NA
YER075C	PTP3	5.70048	-0.119406	-0.053	5.69324	-0.065291	NA	5.76875	-0.0805132	NA
YER076C		5.0137	-0.235556	-0.088	4.76907	-0.0547486	NA	5.01319	-0.0443273	NA
YER077C		4.71144	-0.031544	NA	4.79959	0.0162613	NA	5.0965	0.00677472	NA
YER079W		5.30923	-0.198627	-0.064	5.1978	-0.0371741	NA	5.06155	-0.18566	NA
YER080W	AIM9	6.96422	-0.0172376	-0.007	6.66659	0.010473	NA	6.77462	-0.0110926	NA
YER081W	SER3	7.48859	0.100483	0.043	7.62399	0.127074	NA	7.23728	0.0862199	NA
YER082C	UTP7	5.57195	-0.0141212	NA	5.91852	-0.00649916	NA	5.5684	-0.00271981	NA
YER083C	GET2	6.53763	-0.0231384	NA	6.32637	0.00605611	NA	6.60541	-0.000752754	NA
YER087W	AIM10	4.44506	0.0596099	NA	4.56756	-0.0431808	NA	4.79978	0.0273673	NA
YER088C	DOT6	6.42769	-0.00454599	NA	6.03803	0.0107933	NA	6.4429	-0.0435807	NA
YER090W	TRP2	7.86996	-0.0207571	NA	7.92152	-0.040256	NA	7.75609	-0.0128747	NA
YER091C	MET6	7.80099	-0.0349789	NA	7.77031	0.0366752	NA	7.58559	-0.0279696	NA
YER092W	IES5	6.31874	-0.184257	-0.063	6.34774	-0.0574071	NA	6.21454	-0.138162	NA
YER093C	TSC11	4.35908	-0.0323666	NA	4.54274	0.0111063	NA	4.38911	-0.0339125	NA
YER094C	PUP3	8.10593	-0.00755707	NA	7.63893	0.016361	NA	8.1303	0.00412278	NA
YER095W	RAD51	7.12229	-0.0414282	-0.006	7.23314	0.0220421	NA	7.39622	-0.0218742	NA
YER096W	SHC1	3.72543	0.0247764	NA	4.50975	0.0120413	NA	4.37779	0.0330787	NA
YER098W	UBP9	3.30152	-0.0372595	NA	3.914	-0.0962228	NA	3.8945	0.00570983	NA
YER100W	UBC6	6.76311	-0.00216388	NA	6.26238	0.0552643	NA	6.62259	0.000607269	NA
YER102W	RPS8B	10.5589	-0.0849595	-0.002	10.2649	0.000483704	NA	10.3841	0.00557114	NA
YER104W	RTT105	4.62189	-0.0755056	NA	4.97328	-0.0566552	NA	4.93546	-0.052574	NA
YER105C	NUP157	7.52791	-0.0273158	NA	7.00192	0.0064572	NA	7.55889	-0.0419328	NA
YER109C	FLO8	5.3317	-0.0168877	NA	5.02115	0.0746587	NA	5.28904	-0.0547362	NA
YER110C	KAP123	8.31557	-0.00740769	NA	8.19259	-0.0224148	NA	8.24128	-0.0259788	NA
YER111C	SWI4	5.75157	-0.03699	NA	5.53558	-0.151709	NA	5.58248	-0.0213163	NA
YER113C	TMN3	6.69875	-0.0377914	NA	6.50245	-0.0788122	NA	6.80612	-0.0167709	NA
YER114C	BOI2	6.75166	-0.0383929	NA	6.24932	0.102861	NA	6.81558	-0.0913516	NA
YER115C	SPR6	6.1231	0.00614308	NA	6.7956	-0.0899736	NA	6.39196	-0.0293548	NA
YER118C	SHO1	6.4648	-0.0788967	-0.019	6.1341	0.0545273	NA	6.60705	-0.033706	NA
YER120W	SCS2	8.35922	-0.0320387	NA	8.35621	-0.0810821	NA	8.36257	-0.0661191	NA
YER122C	GLO3	8.83704	-0.182817	-0.097	8.5677	-0.0997591	NA	8.76175	-0.055166	NA
YER125W	RSP5	7.31439	-0.0183981	-0.004	7.23242	0.00173015	NA	7.29012	-0.00206697	NA
YER127W	LCP5	5.88732	-0.0233875	NA	6.13438	0.0585661	NA	6.09879	-0.0649087	NA
YER131W	RPS26B	9.27529	0.00153116	NA	8.71143	0.0192999	NA	9.28636	0.000531171	NA
YER133W	GLC7	6.31689	0.0162771	NA	5.94121	0.00539086	NA	6.43758	-0.0236615	NA
YER134C		5.88011	-0.0105777	NA	6.17468	0.0561908	NA	5.9548	0.0368586	NA
YER136W	GDI1	8.01495	-0.0108183	NA	8.1555	-0.038501	NA	8.1123	0.0179514	NA
YER138W-A		8.41544	0.147991	0.062	7.71882	-0.0952001	NA	7.79756	0.073819	NA
YER139C	RTR1	3.77884	-0.0397109	NA	3.5077	-0.11214	NA	3.45525	-0.0309522	NA
YER142C	MAG1	5.76912	0.07486	NA	5.65325	0.202837	NA	5.82484	0.105609	NA
YER144C	UBP5	5.99108	0.0188788	NA	6.12873	0.00248761	NA	6.08148	0.00332599	NA
YER145C	FTR1	7.27984	0.0264873	NA	7.23351	0.0155697	NA	7.15125	0.00414897	NA
YER147C	SCC4	6.37068	-0.0956321	-0.017	6.74765	-0.133731	NA	6.58037	-0.103285	NA
YER154W	OXA1	6.73908	-0.0138003	NA	6.48684	0.0310177	NA	6.81135	-0.00156207	NA
YER158W-A		1.17305	-0.177616	NA	1.41476	0.168019	NA	1.02103	-0.0374867	NA
YER159C	BUR6	6.53455	0.0189396	NA	7.11758	0.01226	NA	6.66298	0.0064003	NA
YER160C		4.92513	-0.132573	NA	4.58567	-0.217804	NA	4.22039	-0.209471	NA
YER163C	GCG1	7.01853	-0.0567551	NA	7.1154	-0.198011	NA	7.09992	-0.0784676	NA
YER164W	CHD1	5.86446	0.0639903	0.005	5.5857	0.0559881	NA	5.74637	0.00895365	NA
YER165W	PAB1	10.573	0.0217515	NA	10.1545	-0.0516152	NA	10.5674	0.032824	NA
YER166W	DNF1	7.22684	0.0344088	NA	7.17854	-0.0116792	NA	7.53495	-0.0135563	NA
YER167W	BCK2	6.04994	-0.0835461	NA	5.85503	0.118116	NA	6.19412	0.0116624	NA
YER170W	ADK2	4.59495	-0.145599	-0.004	4.32333	0.0290782	NA	4.84879	-0.0371437	NA
YER175C	TMT1	4.97402	-0.0128812	NA	4.77104	-0.00237564	NA	4.77688	0.0251372	NA
YER176W	ECM32	8.12744	0.0083152	NA	7.80838	0.102823	NA	8.29226	0.00189126	NA
YER177W	BMH1	11.6505	-0.0339879	NA	11.8557	-0.110631	NA	11.7873	-0.0667054	NA
YER178W	PDA1	9.14439	0.00330554	NA	8.74454	0.0351548	NA	8.84989	0.000534957	NA
YER186C		5.76426	-0.00676814	NA	5.87795	0.0569658	NA	5.78991	-0.0265815	NA
YER187W		2.09552	0.154249	NA	3.07375	0.0865986	NA	2.69385	0.110549	NA
YFL001W	DEG1	4.78473	-0.00299352	NA	4.56103	-0.0123255	NA	5.04028	0.565221	0.305
YFL002W-A		5.23019	-0.152408	-0.042	6.0727	-0.0145436	NA	5.82825	-0.03082	NA
YFL003C	MSH4	3.25918	0.0822838	NA	2.62354	0.53215	0.049	2.94447	0.395093	0.028
YFL004W	VTC2	7.25712	-0.0845137	-0.033	7.04272	0.0357623	NA	7.25419	-0.0554017	NA
YFL012W-A		4.60748	0.0517964	NA	4.28759	-0.0236419	NA	4.57802	0.047678	NA
YFL013C	IES1	5.5857	-0.0613508	NA	5.21379	-0.0479329	NA	5.41012	-0.03138	NA
YFL014W	HSP12	11.543	0.00132044	NA	11.4648	0.0582018	NA	11.6939	0.0380139	NA
YFL017C	GNA1	7.74195	0.035544	NA	7.34345	0.11213	NA	7.91731	0.0833484	NA
YFL021C-A		2.61412	-0.123695	NA	3.36351	0.165896	NA	2.58087	0.0699497	NA
YFL021W	GAT1	6.63482	-0.0732308	NA	7.96386	0.0436844	NA	7.36878	-0.0804449	NA
YFL026W	STE2	5.67526	-0.0416385	NA	7.95241	0.0685238	NA	7.73781	0.0140574	NA
YFL031W	HAC1	6.74579	-0.00600772	NA	7.50068	-0.0390912	NA	7.33384	-0.00716148	NA
YFL033C	RIM15	5.69958	-0.0607748	NA	5.5596	0.0780764	NA	5.38559	-0.0210663	NA
YFL034C-A	RPL22B	8.75252	0.00148207	NA	8.9519	-0.0040714	NA	8.90594	-0.00068465	NA
YFL034C-B	MOB2	6.12442	-0.0201252	NA	6.78848	0.0237127	NA	6.25909	-0.079473	NA
YFL037W	TUB2	8.06011	-0.000998562	NA	7.69446	-0.00703231	NA	8.10062	0.00702638	NA
YFL038C	YPT1	9.88063	0.0033432	NA	9.90058	0.0128127	NA	10.0179	0.00134939	NA
YFL039C	ACT1	11.5118	-0.0308419	-0.015	11.6143	-0.0279513	NA	11.4519	-0.0276382	NA
YFL041W-A		3.59763	0.00764067	NA	3.79392	0.12658	NA	3.45788	-0.0331019	NA
YFL044C	OTU1	5.03047	0.0328914	NA	3.72149	0.104547	NA	4.27845	0.00551686	NA
YFL045C	SEC53	9.82409	0.000405923	NA	9.85717	0.000998587	NA	9.98089	-0.000515564	NA
YFL049W	SWP82	6.87843	0.0196793	NA	6.26956	0.0384677	NA	7.0423	0.0183431	NA
YFL057C	AAD16	5.55332	0.00694519	NA	6.12997	-0.00104327	NA	5.78232	0.0268171	NA
YFL060C	SNO3	3.223	0.00227766	NA	2.86106	-0.0786904	NA	3.22846	-0.122755	NA
YFR001W	LOC1	6.89367	0.00564371	NA	6.6642	0.0151713	NA	7.05426	-0.000560719	NA
YFR009W	GCN20	7.66353	-0.0471379	-0.02	7.40693	0.0120355	NA	7.2664	-0.0280099	NA
YFR013W	IOC3	5.59915	-0.0369305	NA	5.48913	0.00934697	NA	5.71715	-0.0345227	NA
YFR014C	CMK1	5.35082	-0.000294595	NA	5.64374	0.0342989	NA	5.71445	-0.0127535	NA
YFR016C		6.79714	0.0035829	NA	6.85986	-0.046837	NA	6.82998	-0.0295942	NA
YFR020W		5.31067	0.148599	0.038	5.91631	-0.0694528	NA	6.13115	-0.0282407	NA
YFR021W	ATG18	6.1505	0.0238659	NA	6.25375	-0.0219356	NA	6.12621	-0.0143845	NA
YFR022W	ROG3	5.37209	-0.0437205	NA	5.07078	-0.019241	NA	5.43742	-0.0429965	NA
YFR024C-A	LSB3	7.3186	0.00784228	NA	7.23726	-0.138656	NA	7.25271	-0.0328433	NA
YFR031C-A	RPL2A	10.7475	-0.0161294	NA	10.4387	-0.0504939	NA	10.5821	-0.0496742	NA
YFR037C	RSC8	8.70891	-0.0745699	0	8.77835	-0.207786	NA	8.84172	-0.0703848	NA
YFR041C	ERJ5	5.59149	-0.0626946	NA	5.63808	0.04423	NA	5.64769	-0.067686	NA
YFR046C	CNN1	4.46013	-0.0968684	NA	4.40985	0.0867264	NA	4.69689	-0.130398	NA
YFR050C	PRE4	7.67071	-0.00406532	NA	7.74209	-0.121577	NA	7.81762	0.00358798	NA
YFR052W	RPN12	8.08021	-0.0186341	NA	8.25858	-0.00453905	NA	8.1611	-0.01951	NA
YGL001C	ERG26	6.58115	-0.0286987	NA	6.35491	0.035963	NA	6.66026	-0.0544197	NA
YGL002W	ERP6	5.85992	-0.0266564	NA	5.79352	0.0154239	NA	5.91264	-0.01014	NA
YGL003C	CDH1	5.50315	-0.327287	-0.169	5.47078	-0.191911	NA	5.83359	-0.243617	NA
YGL006W	PMC1	5.24195	-0.0183094	NA	5.38732	-0.185128	NA	5.62976	-0.096864	NA
YGL011C	SCL1	8.51167	-0.0351451	NA	7.91964	0.214745	NA	8.55993	0.00999619	NA
YGL013C	PDR1	6.69068	0.0146097	NA	6.89616	0.000835741	NA	6.63251	0.0044676	NA
YGL016W	KAP122	6.5132	0.00342149	NA	6.40911	0.0346957	NA	6.49153	-0.00266738	NA
YGL018C	JAC1	6.57791	-0.0830344	-0.007	5.96945	0.0503511	NA	6.47933	-0.0518781	NA
YGL021W	ALK1	5.81926	-0.171064	-0.042	5.63721	-0.00647181	NA	5.99006	-0.133392	NA
YGL022W	STT3	7.90069	-0.152789	-0.054	7.87743	-0.0357352	NA	7.89423	-0.131557	NA
YGL029W	CGR1	6.33049	-0.0842549	NA	6.09709	-0.00833977	NA	6.32304	-0.0950957	NA
YGL030W	RPL30	10.4502	0.0161292	0.006	10.4874	-0.00402148	NA	10.3609	0.0156215	NA
YGL031C	RPL24A	8.97798	0.0904576	0.01	8.86962	0.118656	NA	8.88558	0.0118235	NA
YGL038C	OCH1	7.08431	0.0440855	NA	7.11609	-0.0266759	NA	7.43537	0.00749845	NA
YGL043W	DST1	6.16022	-0.0130619	NA	5.59507	0.0371799	NA	5.97021	0.0275497	NA
YGL044C	RNA15	5.06937	-0.102996	NA	5.40983	-0.0181497	NA	4.98539	0.0232147	NA
YGL045W	RIM8	5.99116	0.0635585	NA	6.07633	0.0229009	NA	6.01829	0.0133066	NA
YGL047W	ALG13	6.55135	0.0162433	NA	6.3683	0.00717473	NA	6.71032	-0.0137763	NA
YGL050W	TYW3	4.60784	-0.0264393	NA	4.55152	-0.0433998	NA	4.72002	-0.0316951	NA
YGL054C	ERV14	7.62251	-0.00713054	NA	7.76016	0.0174382	NA	7.62677	-0.00939216	NA
YGL055W	OLE1	9.07835	-0.0196101	NA	9.65362	0.090197	NA	9.60034	-0.00125346	NA
YGL058W	RAD6	7.42048	-0.036402	NA	7.22289	-0.0503203	NA	7.36556	-0.0771371	NA
YGL059W	PKP2	4.99295	-0.0389092	NA	5.0561	-0.0423384	NA	5.04123	-0.00881646	NA
YGL061C	DUO1	5.36052	-0.1627	-0.082	5.1774	0.0646062	NA	5.43641	-0.0935571	NA
YGL066W	SGF73	6.13794	0.164152	0.047	5.8357	-0.172285	NA	6.0892	-0.0698375	NA
YGL068W	MNP1	7.09696	-0.0265248	NA	7.04522	0.102688	NA	7.24021	0.0142391	NA
YGL070C	RPB9	5.36382	-0.0663645	NA	5.17102	0.0272663	NA	5.63183	-0.0560729	NA
YGL073W	HSF1	7.49605	0.00791241	NA	7.62821	-0.00096441	NA	7.82261	0.000890298	NA
YGL076C	RPL7A	10.7645	0.000105251	NA	10.7694	0.000784659	NA	10.6094	0.000319485	NA
YGL077C	HNM1	7.00192	-0.0584251	-0.031	6.51713	0.0720342	NA	6.67499	-0.0167725	NA
YGL079W	KXD1	5.83798	0.0185996	NA	5.26474	0.019944	NA	5.57782	0.0236684	NA
YGL082W		5.83631	-0.0555574	NA	5.95302	-0.210624	NA	5.88389	0.0100535	NA
YGL084C	GUP1	6.73538	-0.0533516	-0.011	6.46315	0.0260061	NA	6.79379	-0.0446276	NA
YGL091C	NBP35	5.58884	-0.14055	-0.015	6.01582	0.0777248	NA	5.93323	-0.147103	NA
YGL092W	NUP145	7.08727	-0.0416248	NA	7.07217	-0.20866	NA	7.14037	-0.0303502	NA
YGL095C	VPS45	4.6903	-0.136881	NA	5.08033	-0.0100807	NA	4.61379	-0.167881	NA
YGL096W	TOS8	5.43814	-0.131211	NA	5.39071	0.106669	NA	5.55926	-0.167442	NA
YGL098W	USE1	6.33863	-0.312308	-0.169	4.31611	-0.034248	NA	4.67247	-0.161847	NA
YGL099W	LSG1	5.88231	0.00295661	NA	5.7341	0.0295718	NA	5.68827	0.0091853	NA
YGL101W		5.79885	0.106247	0.018	5.95199	0.0732367	NA	5.8087	-0.000352005	NA
YGL103W	RPL28	11.6781	0.000410012	NA	11.8398	0.000853759	NA	11.6609	0.00074952	NA
YGL106W	MLC1	6.14571	-0.106743	-0.026	5.7794	-0.0260329	NA	5.87853	-0.0447176	NA
YGL111W	NSA1	5.5814	0.00196953	NA	5.82629	0.0212095	NA	5.72685	-0.00117663	NA
YGL114W		5.36042	-0.0153267	NA	5.65262	-0.00344976	NA	5.4388	0.00574878	NA
YGL119W	COQ8	5.40787	-0.0267009	-0.001	5.69883	-0.00683722	NA	5.48342	-0.0188561	NA
YGL121C	GPG1	5.46536	0.0112695	NA	5.68977	0.0531105	NA	5.44357	0.0012734	NA
YGL122C	NAB2	6.91247	-0.0444324	NA	6.5547	0.0969589	NA	6.9653	0.0472621	NA
YGL124C	MON1	4.50392	0.00902012	NA	4.08047	0.117085	NA	4.09133	0.0135243	NA
YGL129C	RSM23	6.42384	-0.0230955	NA	6.25778	-0.132481	NA	6.75657	-0.00437142	NA
YGL130W	CEG1	6.23771	-0.05623	NA	6.45265	-0.0518404	NA	6.38179	-0.054652	NA
YGL131C	SNT2	3.56728	0.105145	NA	3.16556	0.191558	NA	3.48118	0.0804633	NA
YGL136C	MRM2	5.50628	-0.0242145	NA	5.3315	-0.0529937	NA	5.57836	-0.0382563	NA
YGL137W	SEC27	8.02424	-0.164563	-0.071	7.76114	-0.110735	NA	8.02995	-0.15763	NA
YGL139W	FLC3	5.36142	-0.189236	-0.054	5.82658	0.0628412	NA	5.61778	-0.105138	NA
YGL142C	GPI10	5.64965	-0.0567996	-0.013	5.89409	0.00348469	NA	5.92827	-0.0203681	NA
YGL143C	MRF1	5.20786	-0.122712	NA	4.98851	-0.209786	NA	5.5278	-0.202858	NA
YGL145W	TIP20	6.02702	-0.066915	NA	6.57713	0.0257549	NA	6.04488	-0.0838494	NA
YGL147C	RPL9A	9.93704	-0.00198872	0	9.91563	0.00455205	NA	9.75688	-0.000660928	NA
YGL148W	ARO2	8.35405	-0.000405677	NA	8.76134	-0.00142183	NA	8.67016	-0.00500092	NA
YGL151W	NUT1	6.77709	-0.00776624	NA	6.30536	0.0284186	NA	6.70919	-0.00709665	NA
YGL154C	LYS5	4.6353	0.0612909	NA	5.18367	0.196729	NA	4.79056	0.0840732	NA
YGL155W	CDC43	5.2115	-0.149601	-0.034	5.12336	-0.025693	NA	5.42516	-0.0426051	NA
YGL159W		6.03708	-0.0384245	NA	5.60592	-0.0718396	NA	5.89398	0.0153631	NA
YGL163C	RAD54	6.862	-0.0171273	NA	6.6383	-0.0577489	NA	6.95812	0.00699481	NA
YGL174W	BUD13	4.76838	-0.0108837	NA	4.59425	0.0057855	NA	4.87629	-0.0152958	NA
YGL178W	MPT5	2.79193	-0.158193	NA	3.50655	0.0464266	NA	2.62086	0.0241	NA
YGL185C		4.55838	-0.0596995	NA	3.2708	0.0508674	NA	4.31371	0.00357145	NA
YGL186C	TPN1	7.24189	-0.0028648	NA	6.85057	-0.00560513	NA	7.23986	0.0113249	NA
YGL189C	RPS26A	10.9182	-0.00204169	NA	10.2745	0.00461934	NA	10.8979	-0.0026348	NA
YGL190C	CDC55	6.08114	-0.0758983	NA	6.25222	0.0907206	NA	6.1678	-0.0108968	NA
YGL191W	COX13	7.55812	-0.142901	-0.045	8.68518	0.106596	NA	8.04791	-0.0945355	NA
YGL194C-A		5.48605	-0.10531	NA	5.48133	-0.0244409	NA	5.61335	-0.0614182	NA
YGL196W	DSD1	6.67314	0.0390779	NA	6.37741	0.0230248	NA	6.75481	0.040091	NA
YGL197W	MDS3	5.86785	-0.169974	-0.072	5.33878	-0.318145	NA	5.74061	-0.144711	NA
YGL198W	YIP4	6.85872	-0.0648574	-0.017	6.94488	-0.0583281	NA	6.99582	-0.0324527	NA
YGL200C	EMP24	9.94174	-0.000994665	NA	10.1082	0.0112499	NA	9.9845	0.0038191	NA
YGL201C	MCM6	5.37708	-0.123616	-0.008	5.40158	0.225548	NA	5.47329	-0.0666693	NA
YGL203C	KEX1	5.9018	-0.0599325	-0.004	5.77454	-0.00542077	NA	5.96075	-0.0359758	NA
YGL207W	SPT16	8.3481	-0.145784	-0.072	7.98396	-0.1511	NA	8.27568	-0.138787	NA
YGL209W	MIG2	6.29502	0.025785	NA	6.52407	0.0322078	NA	6.54398	0.012249	NA
YGL210W	YPT32	5.53402	0.0379453	NA	6.11364	0.0017044	NA	6.32408	0.0329246	NA
YGL213C	SKI8	5.95942	-0.148076	-0.033	5.94385	-0.132893	NA	5.9784	-0.143531	NA
YGL215W	CLG1	6.96289	-0.0428214	NA	6.51778	0.155805	NA	6.75966	-0.0286855	NA
YGL225W	VRG4	10.0271	-0.0129438	NA	9.98654	0.0134743	NA	9.96047	-0.015486	NA
YGL226C-A	OST5	8.32685	0.0224049	NA	7.61096	0.0638892	NA	8.15998	0.096713	NA
YGL226W	MTC3	5.69048	0.0779966	NA	6.39198	-0.0798089	NA	6.03831	-0.0727905	NA
YGL227W	VID30	5.76807	-0.0980036	NA	6.29172	-0.0436682	NA	5.75312	0.0127827	NA
YGL229C	SAP4	4.30761	-0.168055	-0.019	4.12421	0.0499529	NA	4.11042	-0.011783	NA
YGL231C	EMC4	7.44764	-0.008781	NA	7.73161	-0.0223012	NA	7.40329	0.00808752	NA
YGL237C	HAP2	5.35693	-0.139367	-0.012	5.67058	0.072678	NA	5.50055	-0.106532	NA
YGL238W	CSE1	8.75117	0.000151136	NA	7.9816	0.00688879	NA	8.87084	-0.00501197	NA
YGL242C		6.28435	0.0370946	NA	6.19327	-0.040757	NA	6.28999	0.0168295	NA
YGL247W	BRR6	6.05384	0.0189938	NA	5.70724	-0.108487	NA	6.28139	0.0787011	NA
YGL250W	RMR1	4.6685	-0.100665	NA	4.66579	-0.205629	NA	5.01426	-0.093265	NA
YGL251C	HFM1	4.20199	-0.131872	-0.024	3.24941	-0.0872146	NA	4.11423	-0.0903206	NA
YGL252C	RTG2	5.83641	-0.00864512	NA	6.04127	-0.00376271	NA	6.01243	-0.00281492	NA
YGL253W	HXK2	9.95739	0.0094819	NA	9.5233	-0.0172393	NA	9.93944	-0.00910825	NA
YGL256W	ADH4	5.87772	0.0604901	NA	6.21097	-0.0809216	NA	6.12818	-0.0689428	NA
YGL257C	MNT2	5.83181	0.0256503	NA	5.21894	0.0802294	NA	5.7864	0.0488299	NA
YGR003W	CUL3	6.1694	-0.014636	NA	5.8511	-0.00284593	NA	6.29423	-0.0157847	NA
YGR004W	PEX31	4.68599	-0.0425167	NA	4.96571	-0.0558967	NA	4.99941	-0.0379188	NA
YGR009C	SEC9	5.38911	-0.06692	NA	5.1857	-0.204955	NA	5.39238	-0.0591412	NA
YGR011W		6.24227	-0.0657052	NA	5.78862	-0.198159	NA	5.98668	-0.116196	NA
YGR012W		6.69737	-0.0309137	-0.006	6.42202	-0.0149578	NA	6.70616	-0.0322915	NA
YGR014W	MSB2	7.6024	0.0241993	NA	7.82933	-0.0276637	NA	7.54714	0.015426	NA
YGR015C		5.58227	0.030855	NA	5.06102	0.00471475	NA	5.65894	-0.0103691	NA
YGR016W		3.59309	-0.0917692	NA	3.24132	0.105837	NA	3.13302	-0.185919	NA
YGR019W	UGA1	6.22006	-0.0310192	NA	5.63055	0.0137422	NA	6.0517	-0.0217206	NA
YGR020C	VMA7	10.256	-0.000573714	NA	9.7008	0.0129431	NA	10.0554	0.00183616	NA
YGR026W		8.02653	-0.301346	-0.202	8.21939	-0.196043	NA	8.07608	-0.0914629	NA
YGR027C	RPS25A	11.0876	0.0413947	0.017	10.9383	-0.00373055	NA	10.974	0.0429413	NA
YGR027W-B		6.51611	-0.0484002	NA	6.32507	0.256359	NA	6.24957	-0.122268	NA
YGR028W	MSP1	5.60891	-0.0390788	NA	6.04893	0.084103	NA	5.92408	-0.0357899	NA
YGR029W	ERV1	5.63869	-0.0516418	NA	5.42899	-0.143809	NA	5.93241	-0.0399053	NA
YGR034W	RPL26B	9.5596	-0.000372528	NA	9.14532	0.0285647	NA	9.34558	0.00810939	NA
YGR036C	CAX4	4.18252	0.00540309	NA	3.60563	-0.0831202	NA	3.93841	-0.069769	NA
YGR037C	ACB1	9.92776	0.0149987	NA	9.92166	-0.0072795	NA	10.1593	0.0255454	NA
YGR038W	ORM1	6.7713	-0.192452	-0.086	6.6952	-0.0014929	NA	6.82822	-0.146621	NA
YGR039W		4.68325	-0.00750015	NA	4.90219	0.00545522	NA	4.59179	-0.0274849	NA
YGR042W		5.2637	-0.0690708	NA	5.66948	-0.0309311	NA	5.48435	-0.101454	NA
YGR046W	TAM41	5.27899	-0.0490232	NA	5.78728	-0.0796569	NA	5.4624	-0.0393397	NA
YGR049W	SCM4	6.87455	-0.0538219	NA	6.86429	-0.00159847	NA	7.22238	0.0348179	NA
YGR054W		8.33508	-0.0717473	-0.008	8.52052	0.113501	NA	8.41834	0.00189945	NA
YGR060W	ERG25	10.3176	-0.136667	-0.048	10.9469	-0.220687	NA	10.6769	-0.175937	NA
YGR061C	ADE6	9.09382	-0.0057288	NA	8.62072	-0.00149845	NA	8.56692	0.00418075	NA
YGR062C	COX18	4.9579	-0.049747	NA	4.96635	0.150204	NA	5.26309	-0.0378674	NA
YGR063C	SPT4	7.57251	-0.0269585	NA	7.27541	-0.0223428	NA	7.46606	-0.0146724	NA
YGR064W		3.24958	-0.0498253	NA	3.89732	0.102191	NA	3.74139	-0.0469892	NA
YGR073C		2.0153	-0.00499787	NA	2.58028	0.0195164	NA	1.8257	0.0357162	NA
YGR074W	SMD1	6.92452	-0.0122726	NA	7.00919	0.0304543	NA	7.32382	-0.00113021	NA
YGR081C	SLX9	5.14814	-0.0305569	NA	5.19892	0.0720504	NA	5.33657	-0.0185873	NA
YGR083C	GCD2	6.9159	-0.0102838	-0.003	7.08918	0.010977	NA	7.12036	-0.00776113	NA
YGR085C	RPL11B	9.57306	0.000683637	NA	9.67638	0.00269935	NA	9.61985	0.00281004	NA
YGR086C	PIL1	9.99368	-0.14121	-0.059	10.062	-0.130489	NA	10.0628	-0.083464	NA
YGR091W	PRP31	5.2773	-0.0296858	NA	5.07975	-0.218317	NA	5.7193	-0.159263	NA
YGR092W	DBF2	5.72034	0.0701396	NA	5.87646	0.0655389	NA	5.82516	0.147919	NA
YGR095C	RRP46	6.42305	-0.123981	-0.033	6.27357	0.150436	NA	6.648	-0.127273	NA
YGR097W	ASK10	7.42333	-0.0821624	-0.01	7.05053	-0.0170295	NA	7.40384	-0.05705	NA
YGR098C	ESP1	5.62597	-0.0531253	NA	5.87721	0.105005	NA	5.8306	0.00821812	NA
YGR101W	PCP1	6.59566	-0.031261	NA	6.77873	-0.0703365	NA	6.91546	-0.111756	NA
YGR104C	SRB5	4.75034	-0.243505	-0.071	5.20919	0.189626	NA	4.98006	-0.0878606	NA
YGR105W	VMA21	8.06523	-0.0224494	NA	7.37853	0.0323979	NA	8.01295	-0.0626617	NA
YGR108W	CLB1	6.51044	0.0418584	0.008	6.82609	0.0293599	NA	7.11151	0.0260695	NA
YGR110W	CLD1	3.10834	0.101357	NA	4.21956	-0.119546	NA	3.63641	0.0453958	NA
YGR112W	SHY1	5.15777	0.00641892	NA	5.71432	-0.188463	NA	5.49231	0.0523479	NA
YGR113W	DAM1	5.5687	-0.0518827	NA	5.45962	-0.0285785	NA	5.93086	-0.12705	NA
YGR116W	SPT6	7.56761	0.250617	0.145	7.26145	-0.0390612	NA	7.41135	0.0311599	NA
YGR118W	RPS23A	9.7724	0.0217785	0.003	9.42386	0.0829396	NA	9.6213	0.017302	NA
YGR122W		5.24429	-0.123	-0.046	5.06699	-0.107287	NA	5.24046	-0.0992254	NA
YGR124W	ASN2	8.80648	0.0119822	NA	8.67567	-0.00607475	NA	8.91464	-0.0148767	NA
YGR125W		7.15549	-0.00635064	NA	6.94171	0.0247765	NA	7.15106	-0.000838877	NA
YGR127W		5.45206	-0.0133327	NA	5.46203	0.0339885	NA	5.30959	0.0178863	NA
YGR128C	UTP8	7.91913	0.0688512	0.025	7.31928	0.0310315	NA	7.91634	0.0418517	NA
YGR129W	SYF2	4.35607	-0.137405	NA	4.06918	-0.0808097	NA	4.71785	0.0472494	NA
YGR132C	PHB1	7.39883	-0.1247	-0.034	7.40589	-0.187346	NA	7.45986	-0.0591864	NA
YGR133W	PEX4	3.96465	-0.0277599	NA	4.34615	0.0659854	NA	4.21028	0.0683151	NA
YGR138C	TPO2	6.80198	-0.0576116	NA	6.93571	-0.061647	NA	6.63205	-0.119782	NA
YGR141W	VPS62	5.41177	-0.0435584	NA	4.9205	0.0380246	NA	5.10275	0.0152711	NA
YGR145W	ENP2	5.50457	-0.10284	NA	4.93131	-0.183026	NA	5.63945	-0.100111	NA
YGR146C	ECL1	6.78415	0.00504294	NA	6.94888	0.0168567	NA	6.65194	-0.000435016	NA
YGR148C	RPL24B	9.78039	-0.0556524	NA	9.02951	0.0155385	NA	9.60851	-0.0624289	NA
YGR149W		5.6686	-0.024241	NA	6.28619	-0.0939151	NA	5.70889	-0.0566216	NA
YGR153W		4.93761	0.0220467	NA	4.34858	0.195701	NA	4.77766	0.102066	NA
YGR154C	GTO1	4.78012	-0.073411	NA	5.1225	0.168341	NA	5.03896	-0.0850037	NA
YGR155W	CYS4	9.66688	-0.0438493	-0.006	9.75449	0.0398529	NA	9.5598	0.00147234	NA
YGR158C	MTR3	6.12673	0.0582085	NA	6.1603	-0.168553	NA	5.90152	-0.0697683	NA
YGR159C	NSR1	7.42238	-0.0123963	-0.001	8.39257	-0.0135681	NA	7.44893	-0.0123789	NA
YGR161C	RTS3	5.5247	-0.224621	-0.079	6.53205	0.092525	NA	5.68312	-0.104362	NA
YGR161W-B		4.35096	-0.0260002	NA	4.71311	0.0545575	NA	4.39657	-0.0388634	NA
YGR161W-C		6.15948	0.0882027	NA	6.00907	0.0181414	NA	5.96198	-0.078225	NA
YGR170W	PSD2	5.58292	-0.0377666	NA	5.31005	0.0364583	NA	5.70976	-0.0781991	NA
YGR171C	MSM1	5.25215	-0.0404373	NA	4.76575	0.0475074	NA	5.26886	-0.0244861	NA
YGR173W	RBG2	7.63944	-0.249297	-0.141	7.04716	0.0350089	NA	7.60971	-0.146977	NA
YGR177C	ATF2	5.81054	0.0133083	NA	6.09559	0.00520469	NA	6.20525	0.0204177	NA
YGR178C	PBP1	7.99459	-0.066676	NA	7.98547	-0.124977	NA	8.04649	-0.138413	NA
YGR179C	OKP1	4.72365	-0.0402651	-0.013	4.67539	-0.0266429	NA	4.84585	-0.00256945	NA
YGR181W	TIM13	7.04886	0.00954881	NA	6.70824	-0.00598194	NA	7.07542	-0.00793909	NA
YGR186W	TFG1	5.71867	0.0335169	NA	5.12489	0.133719	NA	5.54591	0.0391833	NA
YGR187C	HGH1	6.17916	0.0326868	NA	6.09718	-0.218652	NA	6.34517	-0.0977674	NA
YGR191W	HIP1	6.93377	-0.00195624	NA	6.83259	-0.0236782	NA	7.00487	0.0700096	NA
YGR192C	TDH3	13.7356	-0.000709107	0	13.5083	0.000489365	NA	13.6303	-3.76796e-05	NA
YGR193C	PDX1	5.55129	-0.0201097	NA	4.69538	-0.0045299	NA	5.50722	-0.0221994	NA
YGR198W	YPP1	5.90193	-0.0417492	-0.012	5.83546	0.021124	NA	6.07125	-0.0227883	NA
YGR199W	PMT6	6.55504	-0.117471	-0.019	6.52479	-0.102235	NA	6.74923	-0.0168941	NA
YGR200C	ELP2	7.7304	-0.030117	-0.013	7.0549	-0.011072	NA	7.63452	-0.0233844	NA
YGR201C		6.32471	-0.00414979	NA	6.53297	-0.0078222	NA	6.81201	-0.000928974	NA
YGR204C-A		1.16394	-0.118701	NA	1.86966	0.0545278	NA	2.02296	-0.466896	-0.028
YGR205W	TDA10	4.8128	-0.115748	NA	4.81414	0.0968599	NA	4.82521	-0.00845691	NA
YGR210C		7.39405	0.00242865	NA	7.04544	-0.00301313	NA	7.46839	-0.00184884	NA
YGR213C	RTA1	2.85494	0.084853	NA	3.3526	-0.0538638	NA	2.96126	-0.0991358	NA
YGR214W	RPS0A	9.78209	-0.00302126	NA	9.37406	0.0009985	NA	9.64415	-0.000290243	NA
YGR215W	RSM27	6.16206	-0.00706193	NA	6.17341	-0.00297792	NA	6.4211	-0.0027555	NA
YGR216C	GPI1	5.33674	-0.161693	-0.028	5.55638	0.10588	NA	5.52628	-0.0574799	NA
YGR220C	MRPL9	6.95145	-0.0244416	NA	7.17063	-0.0256052	NA	7.07659	-0.00880819	NA
YGR227W	DIE2	5.36246	-0.143676	-0.018	5.36892	-0.076348	NA	5.33418	-0.0660083	NA
YGR231C	PHB2	7.54153	-0.0691912	-0.006	7.12602	-0.0398169	NA	7.71577	-0.0112067	NA
YGR234W	YHB1	9.49567	-0.00314804	NA	11.1003	0.0129004	NA	11.2311	-0.00455665	NA
YGR235C	MIC26	6.03671	-0.0120171	NA	6.65202	-0.0376944	NA	6.12186	-0.00520837	NA
YGR240C	PFK1	8.61867	-0.0702014	NA	8.44711	0.124347	NA	8.49899	-0.0592489	NA
YGR243W	MPC3	3.11487	-0.327563	-0.087	4.59401	-0.151015	NA	3.69824	-0.310571	NA
YGR245C	SDA1	6.33569	-0.191704	-0.086	6.44198	-0.18374	NA	6.48629	-0.0488014	NA
YGR251W	NOP19	3.9075	0.146916	NA	3.44908	0.100693	NA	3.75047	0.0696528	NA
YGR253C	PUP2	8.67528	0.013229	NA	8.59192	-0.0021025	NA	8.69647	0.0188871	NA
YGR254W	ENO1	9.8979	-0.0163395	NA	10.3717	0.0557384	NA	10.4358	-0.00591309	NA
YGR255C	COQ6	6.69708	0.0499818	NA	6.73726	0.155175	NA	6.89693	-0.0271061	NA
YGR256W	GND2	5.18835	-0.00144996	NA	5.61258	0.00698514	NA	5.10347	-0.00448193	NA
YGR262C	BUD32	6.41364	-0.0041218	NA	6.27834	0.0210686	NA	6.57887	-0.000335651	NA
YGR264C	MES1	7.84195	0.0098995	NA	7.07981	0.0466318	NA	7.67461	0.0486285	NA
YGR266W		6.17255	-0.0409789	NA	6.38888	0.269042	NA	6.09727	-0.0274649	NA
YGR267C	FOL2	7.98305	-0.0849509	NA	7.56391	0.113815	NA	7.86869	-0.0901593	NA
YGR268C	HUA1	5.45924	0.01662	NA	5.93988	-0.060406	NA	5.32025	0.00711205	NA
YGR278W	CWC22	6.62003	0.0170017	NA	6.97601	-0.0307706	NA	6.8644	-0.0258289	NA
YGR279C	SCW4	9.87559	-0.0391128	NA	9.45969	-0.0341635	NA	9.62031	-0.0181003	NA
YGR280C	PXR1	6.79394	0.0514372	NA	6.51466	0.139735	NA	6.9532	0.0300621	NA
YGR281W	YOR1	6.93276	-0.0922766	-0.023	6.7627	0.0543615	NA	7.11454	-0.0471638	NA
YGR282C	BGL2	10.1232	0.00158525	NA	10.0369	0.29808	NA	9.98208	0.0183206	NA
YGR288W	MAL13	2.20461	-0.0985304	NA	1.76833	-0.191992	NA	2.21331	-0.148089	NA
YHL001W	RPL14B	9.21237	0.00553854	NA	9.02592	0.0132176	NA	9.05499	0.00232922	NA
YHL003C	LAG1	7.21958	-0.0620838	NA	6.69434	0.0955635	NA	7.3788	-0.0555395	NA
YHL006C	SHU1	5.41531	-0.0668046	-0.023	5.36348	0.00663309	NA	5.41703	-0.0361052	NA
YHL008C		5.28353	0.36392	0.191	4.67774	0.144664	NA	4.60241	-0.0633623	NA
YHL010C	ETP1	4.6621	-0.0749041	NA	4.85748	0.00205926	NA	4.84371	-0.00118131	NA
YHL011C	PRS3	8.33527	-0.0163509	NA	8.03695	0.212288	NA	8.18865	0.0035378	NA
YHL014C	YLF2	4.71249	0.124908	0.021	4.38069	0.067995	NA	5.1457	-0.0227093	NA
YHL017W		7.38643	0.0454534	NA	7.367	-0.0104204	NA	7.22457	-0.0184333	NA
YHL024W	RIM4	5.93202	-0.185754	-0.058	6.20464	-0.0269963	NA	6.27343	0.0053272	NA
YHL027W	RIM101	6.83944	-0.00603483	NA	6.3471	0.000292375	NA	6.64945	-0.0523581	NA
YHL029C	OCA5	6.00335	-0.0862014	-0.02	6.10419	0.0528634	NA	5.99892	-0.101551	NA
YHL031C	GOS1	5.83725	0.00229261	NA	5.46032	0.0167409	NA	5.69891	0.0443357	NA
YHL032C	GUT1	4.4979	-0.07149	-0.014	4.77891	-0.0356436	NA	4.70547	-0.00935514	NA
YHL033C	RPL8A	10.812	-0.0869086	NA	10.1908	-0.194005	NA	10.6946	0.0490202	NA
YHL034C	SBP1	8.41891	0.00179736	NA	8.19021	0.0181642	NA	8.58083	0.00137137	NA
YHL035C	VMR1	6.43023	-0.022931	NA	5.77317	-0.0977985	NA	6.08022	-0.0311825	NA
YHL042W		4.47684	0.00718052	NA	3.37644	-0.0588358	NA	3.67346	0.0078349	NA
YHL044W		4.52716	-0.0813087	NA	4.31973	-0.0113315	NA	4.83601	0.010692	NA
YHL047C	ARN2	4.85956	-0.206799	-0.073	4.94108	0.0811238	NA	4.69966	-0.105949	NA
YHL048W	COS8	5.95518	-0.0842118	-0.021	6.51251	0.0760087	NA	6.27062	-0.0213381	NA
YHR001W	OSH7	5.99891	-0.233852	-0.093	6.09036	-0.0692515	NA	5.9525	-0.165526	NA
YHR001W-A	QCR10	6.7124	0.00471604	NA	7.58898	0.073777	NA	7.05369	-0.000939718	NA
YHR005C-A	TIM10	7.88167	0.0202219	NA	7.79642	0.00724581	NA	8.01825	0.00566681	NA
YHR007C	ERG11	10.1901	-0.0978362	-0.009	10.4779	-0.141582	NA	10.6047	-0.140615	NA
YHR011W	DIA4	4.51265	0.0674201	NA	3.65276	-0.044869	NA	4.38557	-0.082006	NA
YHR012W	VPS29	7.54792	-0.104125	-0.034	7.62367	-0.0257139	NA	7.79297	0.0316209	NA
YHR013C	ARD1	6.97371	-0.00645174	NA	6.82971	-0.0227976	NA	7.03272	0.00385209	NA
YHR015W	MIP6	4.15319	0.0370208	NA	4.53841	0.140999	NA	4.68274	-0.00393463	NA
YHR016C	YSC84	7.2106	0.116611	0.054	6.96363	0.000343684	NA	7.3224	-0.0129037	NA
YHR021C	RPS27B	10.9192	0.00108299	NA	10.8836	5.15636e-05	NA	10.7302	0.00204084	NA
YHR023W	MYO1	6.59385	-0.0109008	NA	5.90895	0.0155827	NA	6.34492	0.064418	NA
YHR024C	MAS2	6.34298	-0.12741	-0.043	6.3324	-0.0353037	NA	6.27008	-0.043865	NA
YHR026W	VMA16	8.3536	-0.203168	-0.104	8.44218	-0.0420443	NA	8.35757	-0.11246	NA
YHR029C	YHI9	4.96635	0.021596	NA	5.11282	0.0552138	NA	5.33167	0.0291606	NA
YHR030C	SLT2	8.13927	-0.0839828	NA	8.25945	0.0467653	NA	8.21217	-0.0846478	NA
YHR031C	RRM3	4.89202	0.0516954	NA	3.78406	0.141833	NA	4.57447	0.184316	NA
YHR033W		6.72416	-0.0819294	NA	7.39056	-0.0263101	NA	7.43133	-0.0551462	NA
YHR034C	PIH1	4.72835	0.103776	NA	5.09533	0.0231217	NA	4.9973	-0.0721504	NA
YHR037W	PUT2	6.00364	-0.0138294	NA	6.13802	0.0611889	NA	6.25928	-0.0165217	NA
YHR041C	SRB2	6.81817	-0.00662692	NA	6.51239	0.0267623	NA	6.72677	0.0177094	NA
YHR042W	NCP1	8.09122	-0.161852	-0.077	8.0151	-0.118132	NA	8.19874	-0.12267	NA
YHR044C	DOG1	6.32341	-0.00815169	NA	6.33719	0.0302086	NA	6.65679	0.00721508	NA
YHR045W		4.44719	-0.0619413	NA	4.61543	-0.129467	NA	4.53056	-0.0768094	NA
YHR047C	AAP1	6.84042	0.00938968	NA	6.21782	0.034504	NA	6.76928	0.0143165	NA
YHR049W	FSH1	9.32507	0.00167631	NA	9.3891	0.0194562	NA	9.59486	0.00185469	NA
YHR051W	COX6	6.28406	0.128402	0.019	6.09858	0.180034	NA	6.38902	0.0447424	NA
YHR052W	CIC1	7.07704	-0.00585969	NA	6.57532	0.0400193	NA	7.1873	-0.00742114	NA
YHR055C	CUP1-2	9.1074	0.0105901	NA	8.30504	-0.0502536	NA	8.77065	-0.00963691	NA
YHR062C	RPP1	5.57317	-0.0323443	NA	5.73103	-0.207021	NA	6.06941	-0.0757828	NA
YHR064C	SSZ1	9.00906	-0.00504354	-0.001	8.59322	0.00256714	NA	8.83053	-0.0027602	NA
YHR065C	RRP3	5.10354	0.0134753	NA	5.38898	0.0445681	NA	5.17675	0.000881863	NA
YHR066W	SSF1	6.17498	-0.0296953	NA	6.08452	-0.0159159	NA	6.36774	-0.0130054	NA
YHR068W	DYS1	8.17125	-0.170135	-0.073	7.76262	-0.080135	NA	8.02241	-0.165018	NA
YHR069C	RRP4	6.33191	0.000939424	NA	6.29601	0.0535979	NA	6.51079	-0.0215132	NA
YHR070W	TRM5	5.20039	-0.0532149	NA	4.72786	-0.232861	NA	5.22546	-0.0720263	NA
YHR071W	PCL5	7.43009	0.00324197	NA	8.27538	0.0021322	NA	7.48151	0.00599097	NA
YHR072W	ERG7	7.20551	-0.0478249	NA	6.82893	-0.0446294	NA	7.55788	0.027827	NA
YHR072W-A	NOP10	8.88817	-0.0262567	NA	8.18476	0.0621609	NA	8.79689	-0.0283762	NA
YHR073W	OSH3	6.79322	0.0133516	NA	7.00911	0.0264473	NA	6.83929	0.0110455	NA
YHR078W		8.29346	-0.0047403	NA	7.51974	0.0346686	NA	8.32502	-0.00578839	NA
YHR079C	IRE1	6.67982	-0.0193427	NA	6.71999	0.0343551	NA	6.79564	-0.0174313	NA
YHR081W	LRP1	6.48748	0.0315635	NA	6.26352	0.11399	NA	6.65876	0.0717332	NA
YHR084W	STE12	5.99416	0.0163775	NA	5.96803	0.214955	NA	5.97815	0.0253544	NA
YHR086W	NAM8	4.77264	-0.147776	NA	4.17614	-0.102544	NA	4.39927	-0.0752802	NA
YHR088W	RPF1	6.25526	-0.216918	-0.119	6.40296	-0.0525048	NA	6.42537	-0.160238	NA
YHR089C	GAR1	9.51098	-0.141537	-0.059	9.34094	-0.288128	NA	9.7063	-0.127439	NA
YHR092C	HXT4	5.82581	-0.0155698	NA	6.58213	-0.0571861	NA	6.62293	-0.106022	NA
YHR094C	HXT1	6.55291	-0.0217163	-0.004	5.5774	0.0376119	NA	5.85716	0.000976072	NA
YHR096C	HXT5	3.45256	-0.242137	-0.034	4.91206	-0.0255415	NA	3.77751	-0.0938975	NA
YHR100C	GEP4	5.16761	-0.00124316	NA	5.45036	-0.102219	NA	5.16857	0.0522898	NA
YHR103W	SBE22	7.11606	0.00477613	NA	7.12714	0.0724878	NA	7.33257	0.00963102	NA
YHR112C		7.1862	-0.0128597	NA	6.9804	0.102215	NA	7.17513	-0.0109784	NA
YHR113W	APE4	6.61221	-0.0570834	NA	7.04934	-0.0522441	NA	6.66354	-0.0521398	NA
YHR117W	TOM71	6.22537	-0.019361	NA	6.00325	0.0271298	NA	6.05228	-0.0285999	NA
YHR122W	CIA2	5.07397	-0.0317966	NA	5.4003	-0.000791474	NA	4.94362	0.0320964	NA
YHR127W		5.93872	-0.0376071	NA	6.07088	-0.0209489	NA	6.11861	-0.01338	NA
YHR128W	FUR1	8.00599	-0.0515334	NA	7.61741	-0.0209268	NA	7.77229	0.000152984	NA
YHR132W-A	IGO2	5.42942	0.0120041	NA	5.39031	0.110903	NA	5.49164	0.0469307	NA
YHR133C	NSG1	7.74026	-0.0578971	-0.02	7.55365	-0.0638778	NA	7.68178	-0.0668983	NA
YHR142W	CHS7	7.74647	-0.00459151	NA	7.46542	0.0114054	NA	7.82109	-0.00167115	NA
YHR143W	DSE2	6.84388	-0.0838461	-0.006	6.58384	-0.00392661	NA	6.55882	-0.0556788	NA
YHR143W-A	RPC10	7.85171	-0.016891	NA	7.60313	0.0319657	NA	7.73969	-0.0239029	NA
YHR144C	DCD1	4.7258	-0.0820681	NA	5.03109	-0.0167583	NA	4.76652	-0.03075	NA
YHR146W	CRP1	8.7824	0.00205928	NA	8.29592	-0.00671505	NA	9.04481	0.0379466	NA
YHR147C	MRPL6	6.38142	-0.00614567	NA	6.33121	0.0333968	NA	6.43895	-9.45198e-05	NA
YHR150W	PEX28	4.20654	-0.121737	NA	3.85926	0.0879952	NA	4.34286	-0.0806186	NA
YHR153C	SPO16	3.85554	0.00756071	NA	3.16158	0.0256561	NA	3.93193	0.0409378	NA
YHR155W	YSP1	5.94295	-0.00721868	NA	5.50939	0.0191278	NA	5.78257	0.00482142	NA
YHR159W	TDA11	3.96193	0.0873642	NA	3.90517	0.21867	NA	4.0154	-0.043781	NA
YHR160C	PEX18	3.05334	0.0641588	NA	2.68359	-0.0386794	NA	3.0479	0.0808437	NA
YHR163W	SOL3	7.68172	0.00690192	NA	7.51935	0.0258868	NA	7.71487	0.00914395	NA
YHR167W	THP2	6.12229	-0.075231	-0.034	5.83993	-0.023642	NA	6.12383	-0.0673311	NA
YHR169W	DBP8	5.46904	-0.118145	-0.013	5.23093	-0.0360076	NA	5.78757	-0.142995	NA
YHR176W	FMO1	4.24353	-0.112178	NA	4.28422	-0.0823338	NA	4.37035	-0.0297181	NA
YHR178W	STB5	4.69208	-0.116186	NA	3.95691	0.0585139	NA	4.58009	-0.0388857	NA
YHR180W		3.67923	0.0517903	NA	4.16287	-0.0804397	NA	4.09245	-0.125554	NA
YHR182W		6.09242	-0.00390968	NA	6.39931	-0.0281587	NA	6.41851	-0.0119972	NA
YHR185C	PFS1	2.00513	0.187678	NA	2.00614	0.183359	NA	2.55623	0.0235836	NA
YHR191C	CTF8	6.40595	-0.119524	-0.023	5.96189	0.0650959	NA	6.36586	-0.130109	NA
YHR196W	UTP9	6.58932	-0.0502941	-0.015	6.28946	0.0297791	NA	6.59251	-0.0463914	NA
YHR201C	PPX1	7.61007	-0.00979297	NA	7.42146	-0.0175271	NA	7.75698	-0.0120553	NA
YHR202W		4.10947	-0.0810711	NA	3.96296	-0.204503	NA	3.81064	-0.211604	NA
YHR203C	RPS4B	9.67398	0.00611947	NA	9.60085	-0.0141481	NA	9.45904	-0.0163659	NA
YHR205W	SCH9	5.55633	-0.140446	-0.018	5.8001	-0.145603	NA	5.56332	-0.116291	NA
YHR208W	BAT1	8.02022	0.0113386	NA	7.80318	0.0929139	NA	7.6974	0.0231719	NA
YHR209W	CRG1	6.60864	-0.0169714	NA	6.90125	0.0220885	NA	6.77759	-0.00542163	NA
YHR210C		4.2517	-0.0840136	NA	4.30121	0.0694137	NA	4.45462	-0.125276	NA
YHR214C-B		6.44491	-0.287705	-0.16	6.61285	0.108909	NA	6.59767	-0.227935	NA
YHR214W-A		5.15551	-0.0225532	NA	3.8965	0.0754694	NA	4.5972	-0.00262095	NA
YHR216W	IMD2	7.41245	-0.0628947	NA	7.15773	0.180208	NA	6.69942	-0.111794	NA
YIL002C	INP51	5.88407	0.00200831	NA	5.86656	0.122831	NA	6.13139	0.0370657	NA
YIL004C	BET1	6.73279	-0.0823214	NA	6.2898	0.108262	NA	6.71288	-0.0611772	NA
YIL005W	EPS1	6.4521	-0.224929	-0.103	6.65714	0.0905239	NA	6.52257	-0.0779423	NA
YIL010W	DOT5	7.17572	-0.00535693	NA	6.9913	0.065988	NA	7.17996	-0.00242521	NA
YIL014C-A		5.44569	-0.118112	-0.03	5.63854	-0.0047859	NA	5.81182	-0.0698524	NA
YIL014W	MNT3	7.01084	0.036494	NA	6.321	0.0990373	NA	6.88435	0.0014361	NA
YIL015W	BAR1	4.92554	-0.0330188	NA	6.07058	-0.0407421	NA	6.11168	-0.0312733	NA
YIL017C	VID28	4.97732	-0.112671	-0.004	4.9259	-0.0426511	NA	5.21836	-0.0875228	NA
YIL018W	RPL2B	9.9822	0.0022582	NA	9.81015	-0.000445631	NA	10.1155	-0.000404742	NA
YIL023C	YKE4	7.9875	0.0272788	NA	8.27574	-0.097173	NA	8.23031	-0.0182409	NA
YIL027C	EMC5	7.57962	-0.000636368	NA	7.14046	0.0110764	NA	7.52783	0.00918723	NA
YIL035C	CKA1	7.17937	-0.316549	-0.195	7.25065	0.00342496	NA	7.24386	-0.169282	NA
YIL036W	CST6	5.91171	-0.032813	NA	5.64012	0.0288667	NA	5.79843	-0.0729414	NA
YIL038C	NOT3	6.36411	-0.0270569	NA	6.18889	0.224796	NA	6.20003	-0.0172647	NA
YIL039W	TED1	7.06284	0.0233545	NA	6.90009	0.0206405	NA	7.1151	0.0146154	NA
YIL044C	AGE2	6.06348	-0.0250276	NA	6.35687	-0.0411869	NA	6.17264	-0.0610508	NA
YIL045W	PIG2	3.1749	-0.161343	NA	3.30685	-0.199444	NA	3.31811	-0.0576357	NA
YIL047C/YIL047C-A	SYG1	7.53363	0.0066105	NA	7.22398	-0.144412	NA	7.60206	-0.0316951	NA
YIL048W	NEO1	4.8437	0.0169018	NA	5.28872	0.0179162	NA	5.13183	-0.00565722	NA
YIL049W	DFG10	6.66219	-0.0117998	NA	7.23863	-0.0175974	NA	6.82437	-0.00449001	NA
YIL051C	MMF1	10.5815	-0.00134266	NA	9.90604	0.00376678	NA	9.90389	0.0038935	NA
YIL052C	RPL34B	10.6211	0.0452148	NA	10.1888	0.0267641	NA	10.5613	-0.0674509	NA
YIL053W	GPP1	9.80656	0.0184189	NA	9.6341	0.0449674	NA	9.61409	0.0125389	NA
YIL056W	VHR1	6.68978	0.0218978	NA	7.6389	-0.0102637	NA	6.79527	0.000908645	NA
YIL062C	ARC15	7.92906	0.0405492	NA	7.95837	-0.0979298	NA	8.14322	0.0655057	NA
YIL064W	EFM4	6.73091	0.082855	NA	5.94213	0.301319	NA	6.75144	0.0331291	NA
YIL068C	SEC6	5.50549	-0.0895743	NA	5.31228	-0.144178	NA	5.74336	-0.108448	NA
YIL069C	RPS24B	9.44147	0.005842	NA	9.50793	0.0369349	NA	9.33343	0.00335207	NA
YIL071C	PCI8	5.09956	0.0136806	NA	4.7947	-0.178967	NA	5.19932	-0.013113	NA
YIL073C	SPO22	3.03322	-0.0367111	NA	2.9694	-0.18891	NA	2.69555	-0.075722	NA
YIL075C	RPN2	9.08486	-0.0119299	NA	8.85765	0.035515	NA	9.13827	-0.0200064	NA
YIL077C		5.19041	-0.0447105	NA	5.40958	-0.0447016	NA	5.34192	-0.0911921	NA
YIL079C	AIR1	6.3358	0.0467259	NA	6.06124	-0.0191807	NA	6.53164	0.0604093	NA
YIL083C	CAB2	5.63778	-0.0284197	NA	5.15873	0.0546577	NA	5.10226	0.0407655	NA
YIL094C	LYS12	8.47784	-0.10108	-0.027	8.04348	0.125928	NA	8.06898	-0.0766405	NA
YIL096C	BMT5	5.71675	-0.0517807	NA	5.4488	0.182483	NA	5.88459	0.00956894	NA
YIL097W	FYV10	5.0126	0.0085855	NA	4.89321	-0.00742067	NA	5.20312	0.0148154	NA
YIL099W	SGA1	3.7237	-0.0512128	NA	4.60863	-0.104715	NA	4.26942	-0.157719	NA
YIL101C	XBP1	5.06782	-0.0440186	NA	5.58524	0.0479021	NA	4.65217	-0.00662539	NA
YIL105C	SLM1	6.05118	-0.150896	-0.035	6.46624	0.165416	NA	6.23818	0.103565	NA
YIL107C	PFK26	6.56874	-0.0706313	NA	6.18922	-0.0673628	NA	6.63842	-0.0742864	NA
YIL108W		7.45936	-0.00193432	NA	7.87632	0.00754524	NA	7.57022	0.00284845	NA
YIL109C	SEC24	6.73274	0.0395512	NA	6.88721	-0.00291134	NA	6.69777	0.0330578	NA
YIL110W	HPM1	5.23689	-0.00834841	NA	5.14967	0.081577	NA	5.39389	0.00115449	NA
YIL111W	COX5B	7.57222	0.0497122	NA	6.75337	0.118043	NA	7.33295	0.121471	NA
YIL112W	HOS4	4.70279	-0.102836	NA	4.85214	-0.0868374	NA	4.77897	-0.118219	NA
YIL113W	SDP1	3.5806	-0.0558331	NA	3.99988	-0.0613651	NA	3.68404	-0.144056	NA
YIL114C	POR2	5.61471	0.085921	NA	5.26238	0.0239186	NA	5.3879	0.0342271	NA
YIL115C	NUP159	6.21968	-0.0647422	-0.02	6.24325	-0.0800643	NA	6.00137	-0.0596557	NA
YIL119C	RPI1	5.1976	-0.127465	-0.004	5.37954	0.0346798	NA	5.25592	-0.10424	NA
YIL123W	SIM1	10.3544	0.033252	NA	10.2335	0.0581717	NA	10.4437	0.0133761	NA
YIL125W	KGD1	6.35799	-0.153269	-0.053	6.57103	0.0501338	NA	6.15302	-0.100569	NA
YIL127C	RRT14	6.29613	-0.0542512	NA	6.27201	0.0728312	NA	6.41639	-0.0624857	NA
YIL134W	FLX1	6.43208	-0.030852	NA	5.92349	0.00969845	NA	5.91388	-0.0286439	NA
YIL136W	OM45	5.70844	-0.0851934	NA	5.83914	-0.0126919	NA	5.88905	-0.0664458	NA
YIL137C	TMA108	6.37918	-0.00372137	NA	6.15006	-0.00075911	NA	6.31241	-0.0108042	NA
YIL143C	SSL2	5.62366	-0.0363234	NA	6.22762	0.0860678	NA	5.8415	-0.0144843	NA
YIL144W	NDC80	6.08494	-0.0185167	NA	5.99538	0.00303514	NA	6.24028	-0.00340981	NA
YIL145C	PAN6	6.48591	-0.163379	-0.067	6.37322	-0.128982	NA	6.37333	-0.0938796	NA
YIL146C	ATG32	4.84584	-0.00710787	NA	5.43338	0.0400823	NA	5.08548	-0.00864639	NA
YIL147C	SLN1	7.13285	-0.107758	-0.019	6.98372	-0.0229424	NA	7.2676	-0.0817948	NA
YIL152W		5.77623	-0.0734918	NA	5.9427	0.066308	NA	6.12827	-0.0981433	NA
YIL154C	IMP2'	6.51497	-0.00118695	NA	6.97357	-0.036423	NA	6.81192	-0.0146471	NA
YIL155C	GUT2	6.01936	-0.060324	NA	6.68467	0.106149	NA	6.31567	-0.0231458	NA
YIL156W	UBP7	6.13364	-0.13922	-0.028	5.45929	-0.126596	NA	6.15977	-0.129496	NA
YIL157C	COA1	6.42595	-0.036363	NA	6.71614	-0.0217886	NA	6.60297	-0.0250801	NA
YIL177C		6.46091	-0.0348847	NA	6.40646	-0.185482	NA	6.99933	-0.013462	NA
YIR001C	SGN1	6.32225	0.0191392	NA	6.46875	-0.0228507	NA	6.48099	-0.00817859	NA
YIR004W	DJP1	6.06916	-0.107066	NA	6.31105	-0.00545851	NA	6.04874	-0.0244015	NA
YIR005W	IST3	4.86789	0.013586	NA	5.74742	-0.0638057	NA	5.06798	-0.0294325	NA
YIR006C	PAN1	8.04922	-0.00288862	NA	7.7665	0.0135559	NA	8.15426	-0.00316118	NA
YIR010W	DSN1	5.91772	-0.0530856	NA	5.57799	0.0738729	NA	6.07632	0.00601086	NA
YIR017C	MET28	4.92032	-0.0618193	NA	4.71676	-0.175475	NA	5.1181	-0.0712523	NA
YIR018W	YAP5	4.30002	-0.0316972	NA	3.93088	-0.0533217	NA	3.93599	0.046072	NA
YIR022W	SEC11	8.24541	-0.0139447	-0.006	8.04087	-0.00641242	NA	8.39558	-0.0105485	NA
YIR023W	DAL81	5.02491	-0.0176415	NA	4.80259	0.00196272	NA	4.97002	0.0547707	NA
YIR024C	INA22	4.92732	-0.112496	NA	5.15716	-0.0307461	NA	5.19672	-0.0560331	NA
YIR026C	YVH1	6.0398	0.0523594	NA	5.61238	0.192451	NA	6.22092	0.00352145	NA
YIR033W	MGA2	6.02179	-0.00517408	NA	5.81531	0.0467365	NA	5.70256	0.0158613	NA
YIR034C	LYS1	8.06541	-0.0045944	NA	8.36288	0.0151332	NA	7.82726	-0.00641655	NA
YIR036C	IRC24	7.21286	-0.00940707	NA	7.13018	-0.020316	NA	7.21971	0.0039575	NA
YIR037W	HYR1	8.45578	-0.0485055	NA	8.14213	-0.0179215	NA	8.28692	-0.0604318	NA
YIR042C		4.0963	-0.146059	NA	4.60186	-0.0554044	NA	4.30794	-0.0822569	NA
YJL001W	PRE3	8.4616	-0.00460297	NA	8.83529	-0.0339173	NA	8.4862	-0.0221366	NA
YJL003W	COX16	4.80428	-0.0143318	NA	4.68737	-0.103965	NA	4.93267	0.0071103	NA
YJL005W	CYR1	7.73015	0.00917308	NA	7.70646	-0.105631	NA	7.58291	0.033209	NA
YJL008C	CCT8	7.33174	-0.202334	-0.088	6.93846	-0.408524	NA	7.36829	-0.175209	NA
YJL010C	NOP9	6.14837	-0.154536	-0.094	5.83952	-0.101206	NA	6.30919	-0.117885	NA
YJL011C	RPC17	5.41586	-0.0273423	NA	5.24143	0.0143971	NA	5.59852	-0.0122615	NA
YJL012C	VTC4	7.05717	0.00248909	NA	7.20971	0.0479408	NA	7.42143	0.0094384	NA
YJL013C	MAD3	5.24679	-0.202135	-0.081	5.42108	0.121295	NA	5.47297	-0.0812545	NA
YJL014W	CCT3	6.81892	-0.00386309	NA	6.65081	0.0317257	NA	6.90773	-0.00440646	NA
YJL024C	APS3	7.41765	-0.147754	-0.056	7.08529	-0.154007	NA	7.54535	-0.0970124	NA
YJL030W	MAD2	6.39617	-0.0471588	NA	6.19812	0.139448	NA	6.38999	0.00273461	NA
YJL034W	KAR2	11.2291	-0.0236914	NA	10.8867	-0.114006	NA	11.4933	-0.0216247	NA
YJL035C	TAD2	6.74605	-0.0945787	-0.018	7.20861	0.116613	NA	7.16379	-0.00693512	NA
YJL039C	NUP192	7.96279	-0.142856	-0.081	7.90362	-0.000935319	NA	7.99029	-0.0679819	NA
YJL044C	GYP6	7.04089	0.000886182	NA	6.64815	0.173767	NA	7.13489	-0.0384937	NA
YJL045W		3.223	-0.0736751	NA	3.91454	-0.188907	NA	3.80724	0.0292849	NA
YJL046W	AIM22	6.51596	0.0879318	NA	5.8747	-0.0616356	NA	6.48443	0.007534	NA
YJL047C	RTT101	4.5828	-0.0608521	NA	4.47131	-0.0174909	NA	4.60243	-0.0442359	NA
YJL048C	UBX6	6.92581	-0.464807	-0.347	6.40576	0.054225	NA	6.05067	0.0174872	NA
YJL051W	IRC8	5.04915	0.000930492	NA	5.34694	0.294293	NA	5.16083	0.186759	NA
YJL053W	PEP8	6.64448	-0.0641867	NA	6.29914	0.134648	NA	6.70036	-0.0475184	NA
YJL054W	TIM54	6.38906	-0.262877	-0.141	6.06112	-0.268157	NA	6.31625	-0.16296	NA
YJL061W	NUP82	6.51116	-0.072113	NA	6.19012	-0.0191186	NA	6.39393	-0.0309362	NA
YJL062W	LAS21	6.88822	-0.00633836	NA	6.85786	0.0198614	NA	7.07385	-0.000932193	NA
YJL071W	ARG2	5.6631	0.0293797	NA	5.81732	0.0258031	NA	5.93872	0.0165863	NA
YJL072C	PSF2	5.27678	0.0411666	NA	5.63815	-0.0976192	NA	5.36817	0.104842	NA
YJL076W	NET1	6.96875	-0.0386172	NA	6.60903	0.265815	NA	6.84077	0.0807734	NA
YJL077W-A		6.42702	0.00752505	NA	5.85756	-0.20052	NA	6.77092	-0.0325501	NA
YJL077W-B		3.59816	-0.00690594	NA	4.13507	-0.0162192	NA	4.13681	0.082114	NA
YJL081C	ARP4	5.72715	-0.145023	-0.026	5.6918	0.099204	NA	5.88408	-0.00620877	NA
YJL082W	IML2	7.046	0.00371632	NA	7.22978	0.0188442	NA	7.27737	0.00173864	NA
YJL087C	TRL1	4.8183	-0.0964893	NA	4.77109	0.0194907	NA	4.77661	0.0106495	NA
YJL091C	GWT1	7.20542	0.0179995	NA	6.90559	0.0872347	NA	7.43379	0.0377918	NA
YJL093C	TOK1	5.79198	-0.0455075	NA	6.13691	0.0224627	NA	6.02312	0.0108646	NA
YJL101C	GSH1	6.22993	-0.0693807	NA	6.19974	0.00206959	NA	6.09895	-0.00132795	NA
YJL102W	MEF2	5.04968	-0.348211	-0.171	5.212	-0.00150551	NA	5.40171	-0.0936098	NA
YJL108C	PRM10	5.02153	-0.0448185	NA	5.47415	-0.0428197	NA	5.18018	-0.0924373	NA
YJL110C	GZF3	5.24455	-0.00987382	NA	5.20612	0.0294671	NA	5.09297	0.0169677	NA
YJL116C	NCA3	5.42227	-0.0885496	-0.015	4.76325	-0.156591	NA	5.44208	-0.00368634	NA
YJL117W	PHO86	6.98606	0.00535422	NA	6.911	0.0177838	NA	7.14681	-0.0285013	NA
YJL121C	RPE1	7.93059	-0.0541851	-0.02	8.01538	-0.0252891	NA	7.80017	-0.00844699	NA
YJL122W	ALB1	7.60229	-0.0630486	NA	7.53874	-0.0637194	NA	7.75421	-0.069532	NA
YJL123C	MTC1	7.77596	-0.0562509	NA	7.21901	0.0560029	NA	7.8564	-0.0864519	NA
YJL124C	LSM1	7.38309	0.00239885	NA	7.22986	0.0383054	NA	7.47194	-0.00187903	NA
YJL127C-B		7.30732	0.000597516	NA	6.9986	0.122205	NA	7.20555	0.00626207	NA
YJL128C	PBS2	6.07978	-0.146053	-0.029	6.40203	0.0342953	NA	6.28067	-0.143517	NA
YJL134W	LCB3	6.35913	-0.0707845	NA	6.10763	-0.0321044	NA	6.683	-0.00941761	NA
YJL136C	RPS21B	10.7715	0.0489322	NA	11.0935	0.104722	NA	10.7714	0.0689471	NA
YJL136W-A		2.24004	-0.195714	-0.016	3.41616	-0.399177	NA	3.57293	-0.500831	-0.218
YJL138C	TIF2	9.19444	0.016653	NA	8.581	-0.00741088	NA	9.10384	0.00916028	NA
YJL143W	TIM17	8.29894	-0.137845	-0.049	8.31153	-0.158437	NA	8.41174	-0.065812	NA
YJL146W	IDS2	5.04469	-0.198841	-0.052	5.41338	-0.195075	NA	5.33541	-0.0217898	NA
YJL147C		4.61478	-0.108193	NA	4.69302	0.00699265	NA	4.62263	-0.0898644	NA
YJL148W	RPA34	6.7092	-0.0799078	NA	6.41701	0.00923792	NA	6.75475	-0.066627	NA
YJL154C	VPS35	6.97993	-0.0367556	NA	7.1223	-0.0162161	NA	7.1091	-0.0440559	NA
YJL158C	CIS3	10.6894	-0.116059	-0.028	10.0455	0.127701	NA	10.4444	0.042343	NA
YJL163C		4.43873	0.000563528	NA	4.47238	-0.027282	NA	4.32988	0.0190979	NA
YJL164C	TPK1	6.24777	-0.0452538	NA	6.37805	-0.0100165	NA	6.30804	-0.0317742	NA
YJL166W	QCR8	7.53561	-0.0766496	NA	8.06043	-0.281836	NA	8.14374	0.0288025	NA
YJL168C	SET2	5.92078	0.0581403	NA	5.63699	0.193638	NA	5.87276	0.0613635	NA
YJL171C		8.08622	-6.82263e-05	NA	8.61621	0.0898141	NA	8.3396	0.0185747	NA
YJL172W	CPS1	7.49585	-0.111692	-0.017	7.34667	0.00550248	NA	7.54048	-0.11737	NA
YJL173C	RFA3	7.25367	-0.0664524	NA	7.72267	0.0356285	NA	7.40946	-0.0713241	NA
YJL174W	KRE9	8.80377	-0.0782894	NA	8.86715	-0.159257	NA	8.85771	-0.0618195	NA
YJL176C	SWI3	5.38104	-0.151607	-0.037	5.37379	-0.117093	NA	5.47982	-0.160888	NA
YJL177W	RPL17B	9.89711	0.0151848	NA	9.58733	0.0226996	NA	9.85755	0.00229915	NA
YJL187C	SWE1	5.70054	-0.128114	-0.026	5.79054	-0.0157185	NA	5.9176	-0.0511347	NA
YJL190C	RPS22A	10.4638	-0.0660903	NA	10.323	-0.218509	NA	10.3283	-0.0456939	NA
YJL191W	RPS14B	10.9388	-0.0119347	-0.005	11.1054	-0.0103805	NA	10.9921	-0.00718604	NA
YJL193W		5.50148	-0.169469	-0.053	5.81817	0.0488457	NA	5.75517	-0.0530916	NA
YJL200C	ACO2	8.03643	-0.000435385	NA	8.04381	0.0176973	NA	7.73349	0.00510482	NA
YJL201W	ECM25	7.35122	0.0393082	NA	7.26267	0.104563	NA	7.41135	0.0154922	NA
YJL207C	LAA1	6.12826	0.00678367	NA	6.22263	-0.0117667	NA	6.52541	0.00718459	NA
YJL208C	NUC1	6.32855	-0.155463	-0.047	6.37199	-0.0237333	NA	6.5036	-0.0472947	NA
YJL212C	OPT1	5.40238	-0.0248124	NA	5.21906	0.108569	NA	5.27298	0.0164838	NA
YJL213W		5.5161	-0.0808162	NA	5.25263	-0.10116	NA	5.35924	-0.0771626	NA
YJL216C	IMA5	3.73255	-0.0231039	NA	3.82778	-0.127303	NA	3.98208	0.00597962	NA
YJL225C		6.44422	0.0325899	NA	6.42512	-0.17934	NA	7.00602	-0.0143219	NA
YJR001W	AVT1	6.69124	-0.0385929	0	6.63262	-0.0431529	NA	6.77552	-0.00682401	NA
YJR002W	MPP10	6.63663	-0.139683	-0.057	6.21988	-0.110662	NA	6.73055	-0.0842254	NA
YJR003C		5.40127	0.0988258	0.033	5.62243	0.0441462	NA	5.71706	0.0541197	NA
YJR004C	SAG1	5.33364	0.0713554	NA	4.36688	-0.0825361	NA	4.5023	-0.0444435	NA
YJR005W	APL1	5.729	-0.188004	-0.072	5.78348	0.21176	NA	5.84656	-0.0763372	NA
YJR006W	POL31	6.82366	-0.0656138	-0.028	5.96388	-0.0137568	NA	6.76154	-0.0488851	NA
YJR008W	MHO1	5.35791	-0.0999817	NA	5.73646	-0.136478	NA	5.38776	-0.158726	NA
YJR009C	TDH2	11.7281	2.40441e-05	NA	11.2175	0.0036478	NA	11.3875	4.57045e-05	NA
YJR010C-A	SPC1	5.16985	0.00431956	NA	5.49155	0.0588314	NA	5.52689	-0.0381195	NA
YJR011C		5.0405	-0.152608	-0.025	5.36495	-0.0207666	NA	5.5067	-0.135783	NA
YJR012C		5.33012	0.0319053	NA	5.37608	-0.0877347	NA	5.56251	0.103423	NA
YJR014W	TMA22	8.33521	-0.00847635	NA	7.98848	0.0743661	NA	8.2646	0.0530586	NA
YJR015W		7.43464	-0.10202	-0.017	7.28678	0.0646514	NA	7.45513	-0.106893	NA
YJR016C	ILV3	8.0488	-0.0127787	NA	7.66112	-0.00587412	NA	7.79735	-0.0230049	NA
YJR020W		3.57532	-0.0472798	NA	4.63942	-0.00120022	NA	4.80621	0.0357582	NA
YJR022W	LSM8	3.96893	-0.0278954	NA	4.11717	-0.0659371	NA	3.98217	-0.0349705	NA
YJR025C	BNA1	7.23023	-0.0770584	-0.019	7.16515	-0.0820895	NA	7.38547	-0.0596744	NA
YJR027W		5.54286	-0.0655273	NA	4.69524	0.0338804	NA	4.39254	-0.079581	NA
YJR029W		6.53551	-0.0409126	NA	6.36876	0.246955	NA	6.24508	-0.0906853	NA
YJR031C	GEA1	6.27218	-0.0571978	NA	5.96709	0.0233795	NA	6.33181	-0.085955	NA
YJR034W	PET191	5.07709	-0.0468901	NA	5.08949	-0.202945	NA	5.338	-0.0692312	NA
YJR042W	NUP85	6.09293	0.026614	NA	6.06224	-0.00277472	NA	6.04635	0.0655629	NA
YJR045C	SSC1	10.9501	0.0211621	NA	10.9871	0.0511981	NA	11.0028	0.0552698	NA
YJR049C	UTR1	6.10661	-0.0364188	NA	5.57655	-0.168062	NA	6.02718	-0.0467595	NA
YJR051W	OSM1	7.10238	0.00320229	NA	6.21754	0.0241125	NA	6.78852	0.00490177	NA
YJR054W	KCH1	6.77873	-0.146199	-0.06	6.59244	-0.0741037	NA	6.94362	-0.160306	NA
YJR057W	CDC8	5.89044	0.014619	NA	5.48161	-0.00443177	NA	5.74763	0.0195044	NA
YJR058C	APS2	7.27044	-0.000263426	NA	6.94478	0.0150586	NA	7.2124	0.00333576	NA
YJR059W	PTK2	6.47452	-0.131795	-0.028	6.76907	-0.0899634	NA	6.56162	-0.177488	NA
YJR060W	CBF1	3.05069	0.120817	NA	2.77966	0.0198008	NA	3.02233	0.0382573	NA
YJR063W	RPA12	6.83691	0.00275224	NA	7.18783	-0.0197042	NA	6.79725	0.00356782	NA
YJR064W	CCT5	7.70401	0.0295628	NA	7.05117	0.154737	NA	7.63981	0.0643264	NA
YJR067C	YAE1	4.93057	0.0448169	NA	4.46387	0.0146368	NA	4.53214	0.0974752	NA
YJR072C	NPA3	7.12514	-0.0862132	-0.023	7.03826	-0.112296	NA	7.32471	-0.106081	NA
YJR073C	OPI3	7.75633	-0.0716243	NA	8.0361	-0.047995	NA	7.94047	-0.0290349	NA
YJR075W	HOC1	8.03556	-0.147808	-0.049	7.82806	-0.0457965	NA	8.05675	-0.0414631	NA
YJR077C	MIR1	8.25431	-0.117607	-0.029	8.48392	0.0709549	NA	8.31858	-0.0634499	NA
YJR080C	AIM24	5.33035	0.00200756	NA	5.35437	0.135868	NA	5.76481	0.00924153	NA
YJR082C	EAF6	6.7401	-0.0463153	NA	7.02962	-0.0206844	NA	6.77877	-0.0774412	NA
YJR084W		5.13152	-0.0444046	NA	5.20856	0.0450264	NA	5.16242	0.0141762	NA
YJR088C	EMC2	7.82886	-0.0360128	NA	7.24985	-0.110583	NA	7.78127	-0.0383168	NA
YJR089W	BIR1	5.71939	-0.031172	NA	5.0733	0.0458296	NA	5.8871	-0.0227012	NA
YJR094W-A	RPL43B	10.788	-0.000856248	NA	10.2484	0.000617709	NA	10.6767	-0.000902918	NA
YJR095W	SFC1	3.76452	0.113243	NA	3.46242	0.121429	NA	3.44519	0.181505	NA
YJR099W	YUH1	6.12594	-0.0506333	NA	5.70577	-0.0354912	NA	6.30363	0.00333298	NA
YJR101W	RSM26	7.17346	-0.0850177	-0.018	6.97412	0.0228341	NA	7.25555	-0.0722552	NA
YJR106W	ECM27	2.95132	0.0590194	NA	2.76306	0.143667	NA	2.67494	-0.122836	NA
YJR107W		4.64538	0.0275624	NA	5.40443	0.155291	NA	4.92475	0.0289376	NA
YJR114W		3.36352	-0.168844	NA	3.7484	-0.359059	NA	3.16485	-0.274883	NA
YJR115W		5.2409	0.132864	0.039	5.70725	-0.0463651	NA	5.11464	0.0375038	NA
YJR118C	ILM1	7.36606	-0.000568331	NA	7.04664	0.067221	NA	7.45804	-0.0156355	NA
YJR121W	ATP2	9.81056	-0.0167128	NA	10.3013	0.0811082	NA	10.1552	0.0246068	NA
YJR124C		5.50465	-0.0911263	NA	5.06194	-0.0426671	NA	5.40496	-0.0860763	NA
YJR129C	EFM3	4.24196	-0.182802	NA	4.51896	-0.212073	NA	5.5194	-0.084475	NA
YJR130C	STR2	5.58158	-0.0341157	NA	5.61477	-0.230609	NA	5.80262	-0.0139178	NA
YJR131W	MNS1	6.43816	-0.171026	-0.074	6.23019	0.129633	NA	6.45146	-0.110469	NA
YJR132W	NMD5	6.76856	0.115671	0.024	6.12093	0.022522	NA	6.30852	0.0394414	NA
YJR135W-A	TIM8	7.08158	-0.09873	-0.034	6.78646	-0.0051051	NA	7.03619	-0.014021	NA
YJR142W		6.56977	-0.00559286	NA	6.71201	-0.0273198	NA	6.46283	0.0331453	NA
YJR144W	MGM101	7.07593	-0.0105795	NA	7.65808	-0.0172043	NA	7.30786	-0.00727034	NA
YJR145C	RPS4A	10.6003	-0.0181253	-0.008	10.0157	-0.0135695	NA	10.3804	-0.0106686	NA
YJR147W	HMS2	5.68119	0.0940602	0.001	4.83195	-0.19289	NA	5.37411	-0.068152	NA
YJR148W	BAT2	8.07775	0.00133036	NA	7.37784	-0.0201523	NA	7.60584	0.00938148	NA
YJR149W		4.40732	-0.00677492	NA	4.92616	0.0129918	NA	4.61956	0.0510531	NA
YJR151C	DAN4	3.47049	-0.0605183	NA	3.91964	0.0124265	NA	3.64698	-0.0487073	NA
YJR155W	AAD10	5.16955	-0.0277698	NA	5.06793	0.107176	NA	5.28661	0.0535179	NA
YKL002W	DID4	5.89583	-0.47019	-0.32	6.16139	-0.139425	NA	6.15597	-0.0600108	NA
YKL003C	MRP17	7.67916	0.0160514	NA	8.3351	0.0104158	NA	7.96282	0.00577086	NA
YKL004W	AUR1	7.72143	-0.0278148	NA	7.5202	-0.185708	NA	7.72227	0.0306281	NA
YKL005C	BYE1	7.24337	-0.0546528	NA	6.89238	0.0168084	NA	7.2636	0.0184704	NA
YKL006C-A	SFT1	8.37895	-0.0234341	NA	7.97976	0.0154972	NA	8.06467	-0.0908136	NA
YKL008C	LAC1	7.01472	-0.156015	-0.063	6.2061	0.0145942	NA	6.58278	-0.0589586	NA
YKL015W	PUT3	5.45624	-0.0899477	-0.013	5.56874	0.0216994	NA	5.49208	0.0792632	NA
YKL018C-A		6.12013	-0.0457041	NA	6.14948	0.0482985	NA	6.44514	-0.0809105	NA
YKL023W		5.09858	0.0547894	NA	5.78525	0.045918	NA	5.15881	0.0253211	NA
YKL025C	PAN3	6.95996	-0.0260384	-0.009	7.09666	-0.00894162	NA	7.17211	-0.0150204	NA
YKL026C	GPX1	5.03266	0.0169265	NA	5.17602	0.107824	NA	5.45829	0.0327146	NA
YKL028W	TFA1	6.07033	0.00245095	NA	6.14541	-0.00484667	NA	6.1486	-0.0333152	NA
YKL029C	MAE1	7.33903	-0.0377353	NA	7.15526	-0.0124857	NA	7.13677	-0.0745205	NA
YKL032C	IXR1	5.7436	0.0111802	NA	6.18814	0.077607	NA	5.9091	0.0634563	NA
YKL033W	TTI1	4.07284	-0.21262	-0.059	4.24231	0.10216	NA	4.29769	-0.107425	NA
YKL033W-A		7.38139	-0.00439686	NA	6.63315	0.0249213	NA	7.39135	0.00533902	NA
YKL039W	PTM1	7.02046	0.314269	0.187	6.79319	0.0955983	NA	6.75383	0.0512981	NA
YKL040C	NFU1	6.55809	0.00053119	NA	7.21313	0.0567842	NA	6.63837	0.0234607	NA
YKL041W	VPS24	5.70774	-0.153886	-0.059	5.38729	0.0542222	NA	5.639	-0.121161	NA
YKL045W	PRI2	6.20111	0.205255	0.119	6.2761	-0.384674	NA	6.61085	-0.11404	NA
YKL046C	DCW1	8.30503	-0.0846615	NA	8.33542	-0.220393	NA	8.41675	-0.086832	NA
YKL047W	ANR2	6.51068	-0.024585	NA	6.51876	-0.00925922	NA	6.72013	-0.0690415	NA
YKL050C		3.79924	-0.00291271	NA	4.02278	0.0890539	NA	3.68901	-0.0168581	NA
YKL051W	SFK1	6.76348	-0.153369	-0.063	6.2479	-0.00577073	NA	6.64343	-0.0349481	NA
YKL052C	ASK1	6.93081	-0.00724671	NA	7.29514	0.000191971	NA	6.98181	-0.00982279	NA
YKL054C	DEF1	7.84934	-0.0815946	-0.041	7.65551	-0.0287676	NA	7.73675	-0.0289571	NA
YKL056C	TMA19	11.1509	-0.011363	NA	11.1368	0.0959819	NA	11.1507	-0.0130015	NA
YKL058W	TOA2	6.47462	-0.112382	-0.059	6.1527	0.161023	NA	6.61409	0.0038269	NA
YKL059C	MPE1	5.6594	0.313036	0.163	4.47273	0.0870201	NA	5.62097	-0.0448533	NA
YKL060C	FBA1	12.5814	-0.00115606	NA	12.6309	0.00155693	NA	12.6288	-0.00158444	NA
YKL061W	BLI1	5.04093	-0.375526	-0.195	5.84155	0.0699131	NA	5.20971	-0.14823	NA
YKL062W	MSN4	3.53491	-0.0762316	NA	4.43682	0.0278263	NA	3.93678	-0.0430088	NA
YKL063C		7.66483	-0.00681693	NA	7.20781	0.0331646	NA	7.606	-0.00647232	NA
YKL064W	MNR2	7.02698	-0.237799	-0.119	6.43268	-0.0859265	NA	6.94251	-0.190804	NA
YKL065C	YET1	8.53662	0.0650084	0.027	8.52722	0.0350491	NA	8.67917	0.00886947	NA
YKL065W-A		4.11571	-0.0499132	NA	4.24909	0.0496529	NA	4.08644	0.091024	NA
YKL068W	NUP100	7.56185	-0.0124002	NA	7.03831	0.0431025	NA	7.68969	-0.0417381	NA
YKL068W-A		7.31053	-0.0458829	NA	6.97396	-0.0262408	NA	7.54851	-0.0487903	NA
YKL069W		5.99101	-0.00698317	NA	5.51651	0.0296018	NA	5.8686	0.0332143	NA
YKL076C	PSY1	5.14317	0.00528489	NA	5.30362	-0.158268	NA	5.26369	-0.0362755	NA
YKL077W		7.57247	-0.0279895	NA	7.42626	-0.00208032	NA	7.55055	-0.0234379	NA
YKL081W	TEF4	9.82297	-0.0257234	NA	9.54177	-0.044732	NA	9.74679	-0.0960744	NA
YKL085W	MDH1	10.2391	-0.168606	-0.089	9.53953	-0.0230461	NA	10.3505	-0.104006	NA
YKL088W	CAB3	5.90528	-0.0822685	NA	5.89995	-0.0310869	NA	5.917	-0.0975716	NA
YKL089W	MIF2	4.09823	-0.115136	-0.027	3.70282	0.0381148	NA	4.29377	-0.0668775	NA
YKL092C	BUD2	5.4297	-0.00559306	NA	5.22677	0.0147079	NA	5.4228	0.0303929	NA
YKL093W	MBR1	3.92607	0.179465	NA	4.69867	0.000218091	NA	4.85342	0.0175937	NA
YKL096W	CWP1	10.5842	0.086367	0.001	10.4678	0.149868	NA	10.4819	0.0551845	NA
YKL096W-A	CWP2	12.5946	0.00166792	NA	13.0493	0.0302919	NA	12.7114	-0.0316749	NA
YKL098W	MTC2	5.56348	-0.0684757	-0.024	5.7082	-0.0425837	NA	5.74789	-0.0397484	NA
YKL100C		7.08701	-0.0314764	NA	7.31015	0.0123458	NA	7.28291	-0.0115691	NA
YKL103C	APE1	6.618	-0.0509392	NA	5.80021	-0.236742	NA	6.09803	-0.0240819	NA
YKL106W	AAT1	6.55307	0.0510375	NA	7.08445	0.010162	NA	6.79882	0.0845172	NA
YKL108W	SLD2	5.46221	-0.00124872	NA	5.55776	-0.2152	NA	5.64411	-0.0723637	NA
YKL109W	HAP4	6.10674	-0.0476685	NA	7.03666	0.0918533	NA	6.72177	-0.00306531	NA
YKL116C	PRR1	5.6453	-0.0668038	NA	5.99142	0.0439975	NA	5.78058	0.0846248	NA
YKL117W	SBA1	8.45797	0.0538074	NA	8.03044	0.0336587	NA	8.36388	0.0965966	NA
YKL120W	OAC1	7.22624	-0.00689667	NA	7.2581	0.0433899	NA	7.18919	-0.00321371	NA
YKL122C	SRP21	6.34355	-0.0538319	-0.006	6.11695	-0.00684422	NA	6.44443	0.0729799	NA
YKL128C	PMU1	7.39074	-0.0930057	-0.011	7.13235	-0.196011	NA	7.30833	-0.0476948	NA
YKL129C	MYO3	6.42917	-0.0797719	NA	6.60936	-0.0873382	NA	6.58228	-0.159552	NA
YKL132C	RMA1	4.75843	-0.126597	NA	5.00954	-0.147633	NA	4.60131	-0.0983119	NA
YKL133C		3.81411	-0.0369285	NA	4.60632	-0.0734306	NA	3.78218	-0.0136038	NA
YKL134C	2001-10-01	4.07845	-0.270924	-0.098	4.18888	-0.0365086	NA	4.59055	0.055696	NA
YKL135C	APL2	6.33147	-0.0849667	NA	6.62177	0.15916	NA	6.43311	-0.0504561	NA
YKL140W	TGL1	5.94396	0.0912389	NA	5.51116	-0.102762	NA	5.50756	0.0187913	NA
YKL142W	MRP8	6.27413	0.017575	NA	6.20989	-0.142277	NA	5.85485	-0.0916033	NA
YKL144C	RPC25	5.4411	-0.0219647	NA	5.31054	0.0420769	NA	5.45213	-0.00599643	NA
YKL145W	RPT1	7.73297	-0.159059	-0.058	7.68631	-0.0970953	NA	7.66527	-0.135283	NA
YKL150W	MCR1	7.35105	-0.0526605	NA	7.83191	0.0513106	NA	7.75371	-0.119241	NA
YKL152C	GPM1	12.8755	0.0651832	0.013	12.6184	-0.161626	NA	12.7061	0.00649635	NA
YKL156W	RPS27A	9.5038	0.00579067	NA	9.68184	0.0899813	NA	9.50283	0.00345363	NA
YKL157W	APE2	7.86349	-0.0265412	NA	7.71435	-0.00810403	NA	7.73476	-0.0342546	NA
YKL159C	RCN1	5.19345	0.109577	NA	5.61135	0.0536953	NA	5.35256	-0.0353489	NA
YKL163W	PIR3	6.99808	0.02819	NA	7.83147	0.150071	NA	7.41557	-0.0119291	NA
YKL164C	PIR1	8.05024	-0.0680336	-0.02	8.45242	-0.0381478	NA	7.758	-0.0361493	NA
YKL165C	MCD4	7.29828	0.0247797	NA	7.6227	-0.0311828	NA	7.80824	-0.0149967	NA
YKL166C	TPK3	6.8703	-0.070797	NA	7.01222	-0.102195	NA	7.11655	-0.116181	NA
YKL167C	MRP49	6.59918	-0.0237499	NA	6.51136	0.0552837	NA	6.58619	0.00605272	NA
YKL168C	KKQ8	5.34767	-0.110095	NA	5.38165	-0.0677059	NA	5.47697	-0.175397	NA
YKL175W	ZRT3	5.67398	0.102489	NA	5.89477	0.0154832	NA	5.45113	0.0909841	NA
YKL176C	LST4	5.74183	-0.06826	NA	6.26174	0.142758	NA	5.8944	0.0131246	NA
YKL178C	STE3	4.70576	-0.116898	NA	2.93807	0.126024	NA	3.22568	0.0474848	NA
YKL179C	COY1	5.60058	-0.0561657	NA	5.63017	0.00870274	NA	5.63035	-0.0280545	NA
YKL180W	RPL17A	9.98005	0.028249	NA	9.79519	0.0222175	NA	9.86261	0.0101788	NA
YKL181W	PRS1	8.5682	0.0111916	NA	7.86619	0.0717919	NA	8.55064	-0.0154922	NA
YKL182W	FAS1	9.45143	0.0230771	NA	9.1643	0.0314812	NA	9.42704	0.01284	NA
YKL183C-A		0.145449	0.0375084	NA	2.52878	0.375004	NA	1.81322	-0.0218574	NA
YKL184W	SPE1	6.92564	-0.151179	-0.087	6.47105	-0.247119	NA	6.81983	-0.0877437	NA
YKL185W	ASH1	6.56077	-0.0075144	NA	7.20004	0.0797018	NA	6.50843	-0.0561829	NA
YKL188C	PXA2	4.03117	0.0605504	NA	4.30959	0.223776	NA	4.66774	0.0215456	NA
YKL189W	HYM1	5.9766	0.00416436	NA	5.4737	0.0672501	NA	6.08762	0.0160115	NA
YKL190W	CNB1	7.31993	-0.00902064	NA	7.12145	0.0170492	NA	7.28417	-0.012793	NA
YKL197C	PEX1	4.77974	-0.0663653	NA	4.95738	0.0815222	NA	4.61562	-0.0714067	NA
YKL203C	TOR2	5.60524	-0.034642	NA	5.41494	0.0179626	NA	5.73126	-0.0182806	NA
YKL204W	EAP1	5.939	0.00256372	NA	6.36886	0.0249796	NA	6.06794	0.00148375	NA
YKL205W	LOS1	6.45465	-0.0559744	NA	6.35584	0.130775	NA	6.52844	-0.0679928	NA
YKL209C	STE6	4.45464	-0.1573	NA	5.69476	-0.159094	NA	5.55049	-0.110461	NA
YKL212W	SAC1	7.33223	0.0590672	NA	7.02743	0.156517	NA	7.03719	-0.0143583	NA
YKL214C	YRA2	4.77285	0.0542695	NA	5.10696	0.00488767	NA	4.9727	-0.029318	NA
YKL215C	OXP1	5.78972	-0.149032	-0.028	6.11393	0.0118818	NA	5.50803	-0.142802	NA
YKL218C	SRY1	5.18539	-0.042263	NA	5.2417	0.0222021	NA	5.26326	0.00494815	NA
YKL219W	COS9	5.78298	-0.0239554	NA	5.61658	-0.0569364	NA	5.54013	-0.0628175	NA
YKL220C	FRE2	5.16857	-0.0481413	NA	5.37978	-0.0858891	NA	5.4484	-0.0596894	NA
YKR001C	VPS1	8.00565	0.0343093	0.003	7.56647	0.0771971	NA	7.97812	0.00541345	NA
YKR004C	ECM9	4.63378	-0.160443	-0.069	4.89058	-0.0685235	NA	4.70419	-0.0239421	NA
YKR008W	RSC4	6.61104	0.033894	0.009	6.62097	0.0243528	NA	6.7618	0.0236191	NA
YKR010C	TOF2	5.84022	-0.103399	NA	5.69856	0.137391	NA	5.96482	-0.0480181	NA
YKR013W	PRY2	8.40522	-0.129023	-0.034	8.81975	0.0148827	NA	8.39528	-0.0483524	NA
YKR014C	YPT52	7.9369	-0.00294569	NA	7.98671	0.135732	NA	8.1331	0.0730392	NA
YKR015C		2.75049	-0.106875	NA	3.48439	-0.110814	NA	3.87691	-0.111652	NA
YKR016W	MIC60	6.69291	-0.042883	NA	6.73209	-0.0522004	NA	6.98775	-0.0551359	NA
YKR017C	HEL1	3.33662	-0.123551	NA	3.11243	-0.0495536	NA	3.37309	-0.151147	NA
YKR018C		7.519	-0.0745304	-0.034	7.4731	-0.0386851	NA	7.22321	0.00429917	NA
YKR036C	CAF4	4.99887	0.0529689	NA	5.02057	-0.0687445	NA	5.1475	0.0406267	NA
YKR042W	UTH1	9.81005	-0.00394721	NA	10.0271	0.0106226	NA	9.57262	-0.0194071	NA
YKR043C	SHB17	8.00113	-0.0926236	-0.005	8.12971	-0.155709	NA	8.17442	-0.159714	NA
YKR046C	PET10	7.00087	-0.0532294	NA	8.1768	-0.100612	NA	7.73248	-0.0784744	NA
YKR052C	MRS4	5.72547	-0.00579244	NA	5.59872	-0.00135729	NA	5.65014	-0.00337328	NA
YKR053C	YSR3	4.17496	0.20422	0.063	4.62076	0.111557	NA	4.26968	0.0996947	NA
YKR057W	RPS21A	10.4577	0.00136402	NA	9.46193	-0.0155364	NA	10.2024	-0.00541929	NA
YKR059W	TIF1	9.84772	-0.00652151	NA	9.51963	0.0689978	NA	9.48429	0.0314045	NA
YKR061W	KTR2	4.39101	-0.0301578	NA	5.31224	0.0929815	NA	5.15537	-0.0113184	NA
YKR062W	TFA2	6.12554	-0.264192	-0.134	6.30692	-0.0497009	NA	6.12681	-0.021069	NA
YKR063C	LAS1	5.21461	0.154858	0.027	4.83427	0.139203	NA	5.18092	0.0658628	NA
YKR064W	OAF3	5.98897	-0.120523	-0.004	6.31809	-0.114026	NA	6.04217	-0.110263	NA
YKR067W	GPT2	5.98726	-0.114227	-0.003	6.29712	0.217276	NA	6.09375	-0.00124643	NA
YKR070W		6.77502	-0.122807	-0.022	6.28767	-0.121626	NA	6.70141	-0.0812232	NA
YKR071C	DRE2	7.49367	-0.119041	-0.056	7.63116	-0.0184249	NA	7.89087	-0.00829673	NA
YKR072C	SIS2	6.21853	-0.173522	-0.056	6.70635	-0.0223382	NA	6.32922	-0.156668	NA
YKR076W	ECM4	6.43957	-0.0930128	-0.011	6.3194	-0.162634	NA	5.85224	-0.106762	NA
YKR079C	TRZ1	5.58126	-0.0487566	NA	5.3757	0.102712	NA	5.68344	0.0339705	NA
YKR080W	MTD1	8.24874	-0.0435692	NA	7.54973	0.167621	NA	7.85947	0.0170869	NA
YKR086W	PRP16	5.95235	-0.0640408	NA	5.52223	0.105316	NA	6.08438	-0.0666407	NA
YKR090W	PXL1	5.21299	-0.0478359	NA	4.87116	0.0268419	NA	5.21332	0.023895	NA
YKR091W	SRL3	7.34981	0.00595439	NA	7.62927	0.0548367	NA	7.51392	-0.00238487	NA
YKR092C	SRP40	7.91533	-0.0806117	-0.027	7.55101	0.0570462	NA	7.7061	-0.019902	NA
YKR093W	PTR2	8.11528	-0.0418097	NA	8.94468	0.0882119	NA	8.33223	-0.0366063	NA
YKR094C	RPL40B	10.201	0.000642828	NA	9.85878	0.00594687	NA	10.0074	0.00157874	NA
YKR097W	PCK1	3.60438	-0.204062	-0.017	4.17473	0.0330334	NA	4.13882	-0.245929	NA
YKR098C	UBP11	4.78324	-0.0110601	NA	4.19796	0.0301276	NA	4.873	-0.0980952	NA
YKR099W	BAS1	5.9269	0.0394122	NA	5.79443	-0.000968131	NA	6.16083	-0.0332168	NA
YKR100C	SKG1	5.61413	-0.072327	NA	5.96784	0.109484	NA	5.65884	0.0537261	NA
YKR101W	SIR1	4.58427	-0.167409	-0.057	4.61878	-0.106641	NA	4.68197	-0.0807684	NA
YKR104W		3.63396	-0.101926	NA	3.76335	-0.0849663	NA	3.6192	-0.140602	NA
YLL001W	DNM1	6.34148	0.0127979	NA	6.62608	-0.0282345	NA	6.44996	-0.0302103	NA
YLL006W	MMM1	4.49372	0.079098	NA	4.51487	0.0167466	NA	4.05011	0.0774844	NA
YLL007C		4.8905	-0.132611	NA	4.48466	-0.0578245	NA	4.88678	-0.0397805	NA
YLL010C	PSR1	6.65182	0.0670862	NA	7.02359	-0.0227707	NA	6.67184	-0.0224515	NA
YLL011W	SOF1	4.73425	0.0484788	NA	4.31361	0.0519548	NA	4.70944	0.0143928	NA
YLL013C	PUF3	6.04102	-0.0201801	NA	5.81614	-0.0363473	NA	6.01192	0.051386	NA
YLL014W	EMC6	6.93018	0.0185892	0.003	6.36338	0.0137831	NA	6.84721	0.0121159	NA
YLL015W	BPT1	6.6383	-0.0229722	-0.004	6.57255	0.00915988	NA	6.62586	-0.0234122	NA
YLL018C	DPS1	8.82081	0.0221204	NA	8.8693	0.103568	NA	8.95513	-0.053813	NA
YLL024C	SSA2	11.7077	-0.0387545	NA	11.6161	-0.137825	NA	11.8045	-0.139581	NA
YLL028W	TPO1	8.50992	-0.0137088	NA	8.49253	0.0363236	NA	8.42845	-0.0487161	NA
YLL032C		5.63557	-0.156965	-0.034	5.76768	-0.0959156	NA	5.98458	0.0313798	NA
YLL033W	IRC19	4.44044	-0.0964077	NA	4.31363	0.0798144	NA	4.40256	-0.0335123	NA
YLL039C	UBI4	8.69998	0.0282542	NA	8.65932	-0.149917	NA	8.65951	-0.0515569	NA
YLL041C	SDH2	6.81941	-0.136844	-0.042	7.48371	-0.019277	NA	7.4857	-0.101033	NA
YLL045C	RPL8B	11.1281	0.000237179	NA	10.7872	0.00747197	NA	10.9678	-0.000179183	NA
YLL048C	YBT1	6.08152	-0.0622588	-0.019	6.30607	-0.0019671	NA	6.17972	-0.0438573	NA
YLL061W	MMP1	4.43245	-0.268251	-0.087	4.10447	-0.124446	NA	5.04668	-0.185786	NA
YLL062C	MHT1	4.24983	-0.088068	NA	4.15209	-0.204653	NA	4.5609	-0.073239	NA
YLL063C	AYT1	4.11107	-0.0563227	NA	4.07596	-0.19574	NA	4.12632	-0.101537	NA
YLL066W-B		2.16915	-0.141175	NA	1.07152	-0.28638	NA	3.12843	0.170666	NA
YLR003C	CMS1	6.70767	-0.0306631	-0.007	6.80221	0.0868983	NA	6.86146	-0.0202957	NA
YLR006C	SSK1	6.24592	-0.0118989	NA	5.68014	0.109372	NA	6.07927	-0.0159597	NA
YLR008C	PAM18	7.36594	0.0504642	NA	7.09917	0.109012	NA	7.5706	0.0322539	NA
YLR010C	TEN1	4.33564	-0.0425032	NA	3.80556	-0.100532	NA	4.67702	0.0121991	NA
YLR011W	LOT6	5.41777	-0.0593922	NA	5.74708	0.048007	NA	5.95026	0.136411	NA
YLR015W	BRE2	4.5929	-0.199516	-0.038	4.69819	0.140337	NA	4.67936	-0.0517899	NA
YLR016C	PML1	6.00834	-0.0573455	NA	6.08333	-0.0718812	NA	6.05062	-0.0133101	NA
YLR019W	PSR2	5.71037	-0.0887165	NA	6.30131	0.0574931	NA	5.95266	-0.130859	NA
YLR023C	IZH3	3.67836	-0.148764	NA	3.86124	-0.057506	NA	3.65545	-0.149092	NA
YLR024C	UBR2	4.74732	0.0251867	NA	4.53088	0.0401734	NA	4.81036	-0.0245217	NA
YLR025W	SNF7	6.19208	-0.333324	-0.195	5.72994	-0.321984	NA	6.01927	-0.123905	NA
YLR026C	SED5	5.15075	-0.209483	-0.063	5.00685	0.0375508	NA	5.12456	-0.120775	NA
YLR029C	RPL15A	10.7686	-0.00340333	0	10.4804	0.0170906	NA	10.5308	0.00241055	NA
YLR033W	RSC58	5.78621	-0.140496	-0.048	5.10411	-0.112255	NA	5.88424	-0.00386042	NA
YLR034C	SMF3	7.13788	-0.0150137	NA	6.7894	0.0292841	NA	6.75662	0.0078865	NA
YLR035C	MLH2	5.16646	-0.20874	-0.063	5.23453	-0.148015	NA	5.26211	-0.17034	NA
YLR036C		4.45902	-0.139636	-0.023	4.28329	0.0821487	NA	4.80881	0.0283544	NA
YLR038C	COX12	7.16514	-0.288502	-0.172	7.7358	0.0565869	NA	7.67921	-0.10246	NA
YLR043C	TRX1	7.97278	0.0159167	NA	7.85919	-0.00575693	NA	8.32994	-0.00414005	NA
YLR045C	STU2	6.35159	-0.0354105	NA	6.69107	-0.10928	NA	6.74316	-0.0763622	NA
YLR046C		6.02598	-0.0463697	NA	5.87804	-0.00491555	NA	6.15775	-0.0616767	NA
YLR048W	RPS0B	10.0542	-0.00539864	NA	10.0091	0.0368812	NA	9.98846	-0.0387594	NA
YLR050C		6.64269	0.0141276	NA	7.26841	0.00738676	NA	6.87297	0.0036814	NA
YLR052W	IES3	5.89216	-0.0131925	NA	5.68063	-0.014055	NA	6.09222	-0.0111688	NA
YLR058C	SHM2	8.84317	-0.00257708	NA	8.17324	-0.00279812	NA	7.67893	-0.0610951	NA
YLR059C	REX2	7.62075	0.00202963	NA	7.93967	-0.0426403	NA	8.13344	0.0265844	NA
YLR065C	ENV10	6.14345	-0.00782608	NA	5.85328	-0.0678369	NA	6.10061	-0.0596042	NA
YLR066W	SPC3	6.08289	0.00976762	NA	6.08306	0.22041	NA	6.07815	0.192866	0.028
YLR074C	BUD20	7.65268	-0.17367	-0.083	8.17862	-0.266808	NA	7.98701	-0.133608	NA
YLR075W	RPL10	11.5258	-0.00017796	NA	10.9035	0.00103692	NA	11.2375	-0.00038932	NA
YLR079W	SIC1	6.07563	-0.111321	NA	5.95972	-0.0950898	NA	5.93865	-0.163105	NA
YLR081W	GAL2	1.70271	-0.181167	NA	1.46042	0.179525	NA	1.97714	0.0175181	NA
YLR083C	EMP70	7.9111	-0.0293812	-0.005	7.86593	-0.015272	NA	7.82242	-0.0275558	NA
YLR086W	SMC4	6.26877	-0.0890966	NA	5.76486	-0.0688691	NA	5.8562	-0.0985515	NA
YLR087C	CSF1	6.01551	-0.0594129	NA	5.9832	0.0256002	NA	6.25928	0.00530045	NA
YLR089C	ALT1	7.7792	-0.0578116	-0.003	7.97133	0.0015416	NA	7.58391	-0.039467	NA
YLR092W	SUL2	4.28792	0.0273589	NA	4.65942	-0.0245297	NA	4.37877	0.0238598	NA
YLR093C	NYV1	7.11924	-0.106364	-0.041	6.97255	-0.0230128	NA	7.02091	-0.019665	NA
YLR096W	KIN2	6.18972	-0.00220565	NA	6.05751	0.0090726	NA	6.175	-0.00375951	NA
YLR099C	ICT1	5.60128	0.0230565	NA	6.03336	-0.0338483	NA	6.10208	-0.0377003	NA
YLR100W	ERG27	6.88257	-0.00231799	NA	6.85222	0.0670349	NA	7.04592	0.00757271	NA
YLR106C	MDN1	7.58901	-0.0396367	NA	7.18585	0.230639	NA	7.67485	-0.0722283	NA
YLR108C		4.38993	0.0288266	NA	5.11796	0.0161281	NA	4.64231	0.0292967	NA
YLR110C	CCW12	13.5103	5.17704e-05	NA	13.7207	0.000138864	NA	13.2904	0.000122505	NA
YLR112W		7.4994	-0.0123397	NA	7.38	-0.1279	NA	7.39707	-0.0974867	NA
YLR113W	HOG1	8.14021	0.00884065	NA	7.89048	-0.0227817	NA	8.23511	-0.00819046	NA
YLR114C	AVL9	5.85403	-0.117673	-0.016	4.98552	-0.000779413	NA	5.25196	0.0297329	NA
YLR115W	CFT2	5.439	0.0245985	NA	5.33447	0.107103	NA	5.33849	-0.016225	NA
YLR116W	MSL5	5.95068	-0.00359761	NA	6.09872	0.00595429	NA	6.13387	0.00106738	NA
YLR117C	CLF1	5.40834	-0.0360548	NA	5.18823	0.0800795	NA	5.51722	-0.0287101	NA
YLR118C		7.58898	-0.00648844	NA	7.82111	-0.0696996	NA	7.59945	-0.0185173	NA
YLR119W	SRN2	4.78615	0.141754	0.013	4.55905	-0.0956615	NA	4.97741	0.0628371	NA
YLR120C	YPS1	7.31253	-0.0913495	-0.014	7.24583	-0.0370866	NA	7.3898	-0.0323337	NA
YLR121C	YPS3	6.21153	0.0318874	NA	6.96072	0.00139379	NA	6.39719	0.0197895	NA
YLR126C		5.59769	-0.128679	-0.042	5.45886	-0.0773041	NA	5.6244	-0.0831256	NA
YLR130C	ZRT2	6.89256	-0.105723	-0.042	6.55445	-0.0195231	NA	6.84052	-0.116952	NA
YLR132C	USB1	4.8093	-0.223013	-0.07	4.74432	-0.22408	NA	4.94531	-0.136111	NA
YLR133W	CKI1	5.05149	-0.0565993	NA	5.00969	-0.00432686	NA	4.66466	0.0209485	NA
YLR137W	RKM5	5.25748	-0.0665111	-0.011	5.2276	0.0161343	NA	5.29781	-0.0399152	NA
YLR142W	PUT1	4.61103	-0.111265	NA	6.25534	-0.182413	NA	5.7289	-0.102266	NA
YLR143W	DPH6	6.14951	-0.0905244	NA	5.98832	0.153783	NA	6.12267	-0.101456	NA
YLR144C	ACF2	6.02232	-0.0610351	NA	6.03524	-0.064349	NA	6.00351	-0.0625653	NA
YLR148W	PEP3	6.0177	-0.0134034	NA	5.35959	0.0528423	NA	5.74478	-0.00963906	NA
YLR150W	STM1	10.5338	-0.0630281	NA	10.0555	-0.132665	NA	10.3837	-0.0439579	NA
YLR151C	PCD1	5.21122	-0.0517055	NA	4.77169	-0.0561833	NA	5.41056	0.0027282	NA
YLR152C		4.7427	0.0309572	NA	4.93599	-0.0200539	NA	5.12062	-0.0488894	NA
YLR153C	ACS2	9.57365	-0.025337	-0.007	9.52914	0.00561992	NA	9.76159	-0.00211453	NA
YLR154C	RNH203	6.36749	-0.0147601	NA	6.64295	-0.0220213	NA	6.5496	-0.00944553	NA
YLR154W-E		4.42	0.0896421	NA	3.57532	0.161884	NA	4.32553	-0.0658099	NA
YLR155C	ASP3-1	5.63412	0.023894	NA	5.76845	0.053307	NA	5.70867	0.00285097	NA
YLR157C	ASP3-2	5.58688	-0.0126394	NA	5.74503	-0.0470679	NA	5.69017	-0.0423321	NA
YLR158C	ASP3-3	5.59026	-0.0295915	NA	5.72117	-0.041237	NA	5.6974	-0.0445592	NA
YLR160C	ASP3-4	5.51929	0.0329519	NA	5.69578	0.0693069	NA	5.65798	-0.000218621	NA
YLR162W-A	RRT15	4.29208	0.032023	NA	3.90272	-0.113935	NA	4.39339	-0.0541024	NA
YLR170C	APS1	7.76721	0.00357402	NA	7.48365	-0.183652	NA	7.90144	-0.0389249	NA
YLR175W	CBF5	7.71223	0.032318	0.004	7.3297	0.12078	NA	7.80483	0.0038208	NA
YLR178C	TFS1	8.57477	-0.00618682	-0.002	9.23759	-0.00360781	NA	8.55669	-0.00408085	NA
YLR180W	SAM1	8.45731	0.0214821	NA	8.54351	0.0749228	NA	8.30616	0.0313977	NA
YLR188W	MDL1	6.45444	-0.135408	-0.033	6.35297	0.0353183	NA	6.48569	-0.143125	NA
YLR189C	ATG26	4.88481	-0.0521351	NA	5.1267	-0.136703	NA	4.87193	-0.0413152	NA
YLR191W	PEX13	5.37144	-0.0483035	NA	5.53554	-0.0360022	NA	5.42738	-0.0429714	NA
YLR192C	HCR1	9.08087	-0.00293162	NA	8.57204	0.0157842	NA	8.95364	-6.46242e-05	NA
YLR195C	NMT1	6.6087	-0.0478494	NA	6.22434	0.00522106	NA	6.68868	-0.0259357	NA
YLR196W	PWP1	5.88231	-0.0956627	-0.026	5.80264	-0.0926534	NA	5.98923	-0.0916557	NA
YLR200W	YKE2	7.31527	0.00349777	NA	8.0205	-0.0194081	NA	7.62526	0.0381081	NA
YLR205C	HMX1	5.10827	0.0789852	NA	5.5236	0.07319	NA	5.29473	-0.0132928	NA
YLR208W	SEC13	7.91219	-0.0723895	-0.013	7.97027	0.0767364	NA	7.94139	-0.0396165	NA
YLR209C	PNP1	6.43113	-0.138115	-0.044	6.31072	-0.121084	NA	6.58823	-0.154588	NA
YLR212C	TUB4	5.64375	-0.0855863	NA	5.61101	0.101442	NA	5.80976	-0.0168627	NA
YLR219W	MSC3	5.55198	-0.0835795	NA	5.81246	-0.0210629	NA	5.64363	-0.0109268	NA
YLR222C	UTP13	7.16243	0.0139683	NA	6.83745	0.024499	NA	7.35734	-0.0296712	NA
YLR227C	ADY4	4.47244	0.157926	0.009	4.46687	0.222304	NA	4.72687	0.276261	0.015
YLR227W-B		5.56282	-0.0925355	NA	4.70688	0.044983	NA	4.41509	-0.0899817	NA
YLR228C	ECM22	4.42257	-0.0758173	NA	4.25476	-0.183779	NA	4.70692	-0.0178038	NA
YLR241W	CSC1	6.84989	-0.0632218	-0.002	6.68045	-0.00423118	NA	6.9048	-0.0550719	NA
YLR243W	GPN3	6.43261	-0.288743	-0.158	6.25515	0.100904	NA	6.79644	0.0642879	NA
YLR244C	MAP1	7.69785	0.00846836	NA	7.44814	0.0203002	NA	7.33326	0.00138005	NA
YLR252W		5.8808	-0.0458877	NA	6.2072	0.0230538	NA	5.94442	-0.0251331	NA
YLR257W		6.78578	0.0100541	NA	7.14568	0.011325	NA	7.07599	-0.00315364	NA
YLR258W	GSY2	6.07288	-0.0103839	NA	6.52665	0.0129984	NA	6.09604	0.0289545	NA
YLR259C	HSP60	11.6953	-0.0433254	-0.016	11.6529	-0.0542672	NA	11.6359	-0.0462145	NA
YLR260W	LCB5	5.31708	-0.0855782	NA	5.55727	0.0524914	NA	5.50063	-0.0895748	NA
YLR261C/YLR262C	VPS63/YPT6	5.53635	-0.246031	-0.096	5.32689	-0.208163	NA	5.6231	-0.107226	NA
YLR262C-A	TMA7	7.09085	0.00855666	NA	6.75656	0.132647	NA	7.10702	0.0723347	NA
YLR268W	SEC22	7.07058	-0.0563795	-0.023	7.05284	0.0174326	NA	7.23579	-0.0225999	NA
YLR270W	DCS1	6.78697	-0.038925	NA	6.91521	-0.0304799	NA	6.87802	-0.0123566	NA
YLR271W		4.08991	0.00190409	NA	3.95016	-0.0152729	NA	4.02345	0.0366985	NA
YLR272C	YCS4	5.03981	0.00949469	NA	4.86863	0.076252	NA	5.14899	0.00781627	NA
YLR274W	MCM5	5.90309	0.0396424	NA	6.19713	0.00836922	NA	5.82013	-0.000727278	NA
YLR278C		5.68119	0.0716459	NA	6.02133	0.301112	NA	5.50323	0.0896259	NA
YLR280C/YLR281C		3.99998	-0.0594516	NA	4.62082	0.0821352	NA	4.39071	-0.0711981	NA
YLR285W	NNT1	6.56159	-0.0173672	NA	6.27655	-0.125038	NA	6.38132	-0.0352244	NA
YLR287C		6.75638	-0.110186	-0.018	6.59449	0.0542417	NA	6.93545	-0.0607777	NA
YLR288C	MEC3	4.12627	-0.0635716	NA	4.14653	-0.25408	NA	4.64155	-0.154367	NA
YLR290C		5.37474	0.0136724	NA	5.6393	0.105381	NA	5.46165	-0.0153126	NA
YLR291C	GCD7	7.26495	-0.0576686	NA	7.34067	0.120534	NA	7.1816	-0.0562139	NA
YLR293C	GSP1	10.3745	-0.0154836	NA	9.94916	0.0400432	NA	10.2074	-0.0403449	NA
YLR297W		5.42424	-0.0452824	NA	5.55551	-0.0378084	NA	5.23881	0.0124914	NA
YLR300W	EXG1	9.26272	0.00345095	NA	9.64529	0.0269483	NA	9.40766	-0.00463405	NA
YLR304C	ACO1	8.5776	-0.328084	-0.212	8.86817	-0.0908704	NA	8.77001	-0.027221	NA
YLR305C	STT4	6.68233	-0.0373055	NA	6.68109	-0.0630116	NA	6.53069	0.0687801	NA
YLR306W	UBC12	4.37774	-0.0707151	NA	4.41121	0.145462	NA	4.52445	0.0282172	NA
YLR309C	IMH1	5.93876	-0.0803786	NA	5.98567	0.0982812	NA	5.7989	-0.0751001	NA
YLR312W-A	MRPL15	6.84346	0.0737869	NA	6.7113	0.0324978	NA	7.26827	0.00386008	NA
YLR317W		4.0548	-0.109002	NA	4.55109	-0.132765	NA	4.23597	0.0762847	NA
YLR321C	SFH1	5.84588	-0.0299006	NA	5.87048	0.0277949	NA	5.88986	0.0190557	NA
YLR324W	PEX30	5.03199	-0.0743398	NA	5.22022	0.0304022	NA	5.02006	-0.0604204	NA
YLR325C	RPL38	11.4132	-0.0462537	NA	10.9367	-0.0174865	NA	11.2765	-0.0340896	NA
YLR333C	RPS25B	10.2136	-0.00927224	NA	9.51298	-0.0228117	NA	10.037	-0.00978438	NA
YLR336C	SGD1	6.4541	-0.0926909	NA	5.97853	0.177031	NA	6.52044	-0.0990232	NA
YLR340W	RPP0	11.7348	7.97781e-05	NA	11.8945	0.00137639	NA	11.7296	0.000179309	NA
YLR344W	RPL26A	10.0163	0.0272493	NA	9.44453	0.0605824	NA	9.97397	0.0384046	NA
YLR345W		6.4575	-0.0374393	-0.003	6.44097	0.0758503	NA	6.59636	-0.0313104	NA
YLR347C	KAP95	7.11528	0.0553984	NA	6.87462	0.450311	NA	6.92035	0.177624	NA
YLR352W		5.51189	-0.00552354	NA	5.33346	-0.0814076	NA	5.55027	0.0214976	NA
YLR353W	BUD8	5.60288	-0.0696498	NA	5.48681	-0.0982395	NA	5.8222	-0.0888514	NA
YLR355C	ILV5	9.54506	0.0770083	0.031	9.83444	0.00616891	NA	9.48551	0.0471116	NA
YLR361C	DCR2	6.15182	-0.0816035	NA	5.77288	0.0164471	NA	6.11311	-0.0054842	NA
YLR361C-A		6.26387	-0.0413627	NA	5.68939	-0.0775555	NA	6.15021	-0.0348618	NA
YLR362W	STE11	4.32604	0.0522354	NA	4.42424	-0.0138329	NA	4.18636	0.0368019	NA
YLR364W	GRX8	5.94312	-0.0259103	NA	5.21482	0.089399	NA	5.7734	-0.0428276	NA
YLR367W	RPS22B	8.55279	0.000582764	NA	8.25454	0.00326957	NA	8.44092	0.00226277	NA
YLR368W	MDM30	4.8259	-0.100787	-0.022	5.06796	0.0461622	NA	5.06385	-0.073306	NA
YLR371W	ROM2	6.6171	-0.0187897	NA	6.0187	-0.000703521	NA	6.39194	-0.0493352	NA
YLR372W	ELO3	8.85063	-0.0927814	-0.022	8.52876	0.0809765	NA	8.84482	-0.0600462	NA
YLR373C	VID22	5.56613	0.0462029	NA	5.68637	0.107076	NA	5.58431	-0.00268669	NA
YLR376C	PSY3	4.5488	-0.0198301	NA	4.68225	0.000328194	NA	4.80917	0.0237526	NA
YLR378C	SEC61	9.32999	0.0136913	NA	9.31758	-0.0182052	NA	9.52871	0.00510045	NA
YLR380W	CSR1	7.36745	0.00187579	NA	7.74761	-0.0816894	NA	7.44413	0.0585093	NA
YLR382C	NAM2	5.09649	0.0552955	NA	5.42593	0.0273839	NA	5.28035	-0.000709796	NA
YLR390W-A	CCW14	9.31734	-0.16178	-0.067	9.54203	-0.184753	NA	8.93786	-0.0716771	NA
YLR392C	ART10	4.94814	-0.0499079	NA	4.91013	0.0194642	NA	5.25601	-0.0187042	NA
YLR395C	COX8	7.83459	-0.0499161	NA	8.52191	0.00882822	NA	8.45581	-0.0198284	NA
YLR396C	VPS33	5.6746	-0.187335	-0.067	5.20872	-0.0725452	NA	5.53044	-0.169053	NA
YLR397C	AFG2	5.74384	-0.119485	-0.032	5.70161	-0.00442085	NA	5.94713	-3.38554e-05	NA
YLR398C	SKI2	6.5632	-0.0282994	NA	6.18359	0.145961	NA	6.446	-0.000175644	NA
YLR399C	BDF1	7.84716	-0.130829	-0.036	7.98056	-0.0542263	NA	7.92961	-0.169371	NA
YLR403W	SFP1	4.45049	-0.0959905	NA	3.89349	-0.197768	NA	4.24997	-0.115281	NA
YLR404W	FLD1	4.58253	-0.0347632	NA	4.38608	0.0538125	NA	4.52787	-0.0285555	NA
YLR406C	RPL31B	10.1677	-0.0635856	-0.004	9.85395	-0.0235739	NA	10.2091	-0.0685159	NA
YLR409C	UTP21	6.30046	-0.0211504	NA	5.79246	0.07771	NA	6.29847	-0.0169662	NA
YLR410W	VIP1	6.61531	-0.0118157	-0.003	6.29444	0.0220507	NA	6.66015	-0.0109866	NA
YLR410W-B		4.44653	0.0169712	NA	4.7212	0.0383753	NA	4.42388	-0.120005	NA
YLR412W	BER1	6.47187	-0.0559985	NA	6.03356	-0.12309	NA	6.15428	0.0852824	NA
YLR417W	VPS36	5.91758	-0.0368594	NA	5.50654	0.0824203	NA	5.58521	-0.0780999	NA
YLR418C	CDC73	6.84143	-0.0266561	NA	6.14676	0.0456758	NA	6.40782	-0.000358088	NA
YLR419W		5.54496	-0.0264289	NA	4.80528	-0.278421	NA	5.02418	-0.111382	NA
YLR422W		6.36903	-0.00122125	NA	5.83419	0.00754253	NA	6.04511	-0.0175573	NA
YLR423C	ATG17	5.1623	-0.020738	NA	5.18016	0.0446005	NA	5.29053	-0.0267342	NA
YLR429W	CRN1	9.0952	-0.00962841	NA	7.92148	0.0123032	NA	8.42552	-0.0216474	NA
YLR431C	ATG23	6.47595	0.141959	0.051	5.53233	0.0326216	NA	5.45959	-0.0127358	NA
YLR432W	IMD3	9.81429	-0.0285699	-0.018	9.18233	0.112343	NA	8.83708	0.0258517	NA
YLR433C	CNA1	5.6741	-0.0919202	NA	5.35911	-0.142762	NA	5.57863	0.0275789	NA
YLR438W	CAR2	5.64002	-0.0211297	NA	6.66647	-0.162887	NA	5.80208	-0.0465625	NA
YLR440C	SEC39	6.49299	-0.032205	NA	6.4112	-0.110594	NA	6.68745	0.0353076	NA
YLR441C	RPS1A	9.58956	-0.0811861	-0.021	9.38325	-0.095048	NA	9.44177	-0.137933	NA
YLR442C	SIR3	6.1361	-0.00223703	NA	6.66444	0.0339341	NA	6.33173	-0.0254707	NA
YLR446W		5.21715	-0.0377898	NA	5.79872	0.0543484	NA	5.5169	0.0422982	NA
YLR448W	RPL6B	10.0093	-0.050162	NA	9.7243	0.0627546	NA	9.91142	-0.00522872	NA
YLR452C	SST2	6.56192	0.0230697	NA	6.03149	0.118924	NA	6.2332	-0.0147082	NA
YLR456W		4.9181	0.00669107	NA	4.94764	-0.0975768	NA	5.15625	-0.00422359	NA
YLR459W	GAB1	6.70481	0.0756731	0.01	6.44825	-0.0116718	NA	6.72943	0.010502	NA
YML001W	YPT7	7.32185	0.00701663	NA	7.52919	0.0170081	NA	7.39484	0.00616284	NA
YML002W		4.48355	0.0582339	NA	4.68909	0.0341561	NA	4.78626	-0.047793	NA
YML004C	GLO1	8.01286	0.0131996	NA	8.10988	0.0137061	NA	8.04368	0.0111321	NA
YML009C	MRPL39	7.82608	0.127726	0.033	7.30609	0.0543027	NA	8.00275	0.112821	NA
YML009W-B		5.87837	-0.0383265	NA	5.34743	0.0302011	NA	5.64455	-0.0266093	NA
YML015C	TAF11	5.89933	0.0993997	NA	5.97333	-0.024363	NA	5.85446	-0.165752	NA
YML016C	PPZ1	5.85786	-0.0426679	NA	5.92041	0.0393914	NA	5.90415	-0.00566071	NA
YML017W	PSP2	7.25775	0.0390753	NA	6.66346	-0.0111813	NA	7.23669	-0.0154983	NA
YML018C		5.97357	-0.106473	NA	5.70794	0.0933605	NA	5.82481	-0.159978	NA
YML021C	UNG1	5.40955	-0.0448414	-0.014	5.22544	0.00886729	NA	5.39762	-0.0165939	NA
YML022W	APT1	8.52009	0.129547	0.04	8.6028	0.0186399	NA	8.3238	0.084364	NA
YML023C	NSE5	6.05706	-0.0798146	-0.035	5.72744	0.0932984	NA	6.25622	-0.063542	NA
YML024W	RPS17A	11.1312	-0.0324894	NA	10.8218	0.0726018	NA	10.9327	-0.0636083	NA
YML026C	RPS18B	9.86122	0.00433095	NA	9.8181	0.00887514	NA	9.71393	-0.0161653	NA
YML027W	YOX1	6.20682	-0.0433025	NA	6.4025	-0.00627167	NA	6.46847	-0.0552981	NA
YML032C	RAD52	5.62305	-0.177365	-0.045	5.93502	-0.085648	NA	5.90853	-0.161401	NA
YML035C	AMD1	7.66724	-0.133526	-0.037	7.60204	-0.0908409	NA	7.56076	-0.0472465	NA
YML036W	CGI121	7.16265	-0.0258685	NA	6.19909	0.307644	NA	6.84756	0.0641849	NA
YML041C	VPS71	5.04936	-0.0410874	NA	5.60625	0.101334	NA	5.29808	-0.0669767	NA
YML045W		6.17577	0.0163255	NA	6.13239	0.0438954	NA	6.13758	-0.0231821	NA
YML048W	GSF2	7.50426	-0.000186168	NA	7.4898	-0.00704023	NA	7.67079	0.00411903	NA
YML052W	SUR7	7.25468	0.000571239	NA	7.22178	0.028993	NA	7.68945	-0.00519763	NA
YML053C		6.95482	-0.0373822	NA	6.8155	0.097055	NA	7.16775	-0.0134549	NA
YML054C	CYB2	4.82179	0.194319	0.033	5.81093	-0.101002	NA	5.64523	0.18422	NA
YML057W	CMP2	7.2624	-0.00840359	NA	7.55974	-0.0161126	NA	7.22951	0.0018361	NA
YML059C	NTE1	7.10058	-0.0128977	NA	6.75627	0.0978768	NA	6.78692	0.000799165	NA
YML060W	OGG1	5.78246	-0.0194624	NA	5.73494	0.0344427	NA	5.83782	-0.0332635	NA
YML063W	RPS1B	11.3716	-0.00182327	0	11.0597	0.002352	NA	11.2742	-0.000996029	NA
YML064C	TEM1	6.32451	-0.0562752	NA	6.31436	-0.132947	NA	6.64529	-0.0270876	NA
YML067C	ERV41	8.17872	-0.00476775	NA	7.40508	-0.00115948	NA	8.27592	-0.00311955	NA
YML076C	WAR1	5.86232	0.0216412	NA	5.99966	-0.0998959	NA	5.81977	0.0331925	NA
YML078W	CPR3	7.47436	0.00302318	NA	7.79842	-0.00637496	NA	7.46729	0.00631276	NA
YML082W		5.37159	-0.0307631	NA	5.13615	0.0576006	NA	5.58021	-0.0127151	NA
YML085C	TUB1	7.96302	-0.0552912	NA	7.93776	-0.0382038	NA	8.20101	-0.0351266	NA
YML093W	UTP14	5.55186	-0.0265752	NA	5.06666	0.0613579	NA	5.68364	-0.0944948	NA
YML095C	RAD10	2.95636	-0.0586437	NA	2.91637	-0.0282692	NA	3.19132	0.027075	NA
YML096W		5.1694	-0.178294	-0.053	5.1009	-0.0368269	NA	5.43729	-0.0808248	NA
YML099C	ARG81	5.24737	-0.0632823	NA	5.19773	0.0757885	NA	5.35374	-0.0679813	NA
YML100W	TSL1	7.34629	-0.00898624	NA	7.91918	0.00994596	NA	6.98096	-0.000558239	NA
YML103C	NUP188	7.56983	-0.00484044	NA	6.76867	0.111801	NA	7.03077	-0.0353535	NA
YML104C	MDM1	5.074	0.00472272	NA	5.23645	0.052945	NA	5.54284	-0.0148903	NA
YML106W	URA5	9.33074	-0.0101566	NA	9.10115	-0.0184877	NA	9.24614	0.0669262	NA
YML107C	PML39	4.48572	-0.174	-0.053	4.42734	-0.143464	NA	4.519	-0.193423	NA
YML109W	ZDS2	5.0442	-0.0507831	NA	5.11327	0.100107	NA	5.28655	-0.0550262	NA
YML110C	COQ5	8.86708	0.018406	NA	8.16398	0.0563153	NA	8.85239	-0.000784958	NA
YML115C	VAN1	8.04765	-0.146322	-0.059	7.44991	0.181459	NA	7.8819	-0.0825626	NA
YML116W	ATR1	4.70763	-0.0151994	NA	4.91107	0.043358	NA	5.0235	-0.0220802	NA
YML116W-A		7.45119	-0.0233147	NA	7.62357	-0.0215944	NA	7.38837	-0.0212549	NA
YML119W		5.92697	0.0115087	NA	6.04792	-0.0120464	NA	6.33832	-0.00667809	NA
YML120C	NDI1	6.58842	-0.0257713	NA	7.24694	-0.026466	NA	7.29232	-0.0372809	NA
YML121W	GTR1	7.36596	-0.013345	NA	7.25558	0.0077793	NA	7.40015	-0.00814969	NA
YML123C	PHO84	5.5882	0.0152191	NA	8.09459	0.0250097	NA	8.01223	0.0103264	NA
YML129C	COX14	6.76885	0.000842659	NA	7.17818	0.0740033	NA	6.82889	0.0947	NA
YML130C	ERO1	8.49933	0.00783807	NA	9.03261	0.0304108	NA	8.59512	0.00704976	NA
YML131W		4.59146	-0.0817816	NA	5.12156	-0.120384	NA	5.48354	-0.0988148	NA
YMR001C	CDC5	6.4103	-0.0471617	-0.008	6.43503	-0.0164415	NA	6.69571	-0.047588	NA
YMR006C	PLB2	6.60049	-0.0106916	NA	5.86128	0.129361	NA	6.17014	0.0216718	NA
YMR008C	PLB1	9.06439	-0.0753723	NA	9.29234	0.224135	NA	8.87647	-0.106665	NA
YMR009W	ADI1	5.92193	-0.04202	NA	6.1285	-0.0922935	NA	6.13459	-0.0408358	NA
YMR010W		6.42131	-0.0329944	NA	6.34813	0.0103901	NA	6.54753	-0.026887	NA
YMR011W	HXT2	6.43443	0.0214638	NA	7.12323	0.148235	NA	6.75805	0.0344994	NA
YMR012W	CLU1	7.80793	0.00763727	NA	7.80196	0.0221558	NA	7.68604	-0.0116874	NA
YMR013C	SEC59	6.24515	-0.0612447	NA	5.8386	-0.0120547	NA	6.35083	-0.0335793	NA
YMR019W	STB4	4.84485	-0.0687831	NA	5.10611	-0.0774084	NA	4.85363	-0.0716226	NA
YMR022W	UBC7	6.99172	0.014123	NA	7.08607	0.0180687	NA	6.9821	0.0082498	NA
YMR029C	FAR8	6.03357	-0.00935871	NA	5.83213	0.13277	NA	5.94912	0.0147356	NA
YMR030W	RSF1	6.24693	-0.0115749	NA	6.44898	0.0549655	NA	6.48109	-0.0147752	NA
YMR033W	ARP9	6.895	0.027064	NA	6.55321	0.0211403	NA	6.97861	0.0175423	NA
YMR035W	IMP2	5.58915	-0.0609743	NA	5.31701	0.0223507	NA	5.52794	-0.0514609	NA
YMR037C	MSN2	6.48066	-0.0683288	-0.023	6.47617	-0.0742522	NA	6.55684	-0.0381261	NA
YMR038C	CCS1	7.30154	0.023991	NA	7.15964	-0.0422739	NA	7.3842	-0.092841	NA
YMR039C	SUB1	6.58744	-0.04522	NA	6.67344	0.0860541	NA	6.75442	-0.058214	NA
YMR040W	YET2	4.06939	-0.0556031	NA	4.58372	0.0302833	NA	4.75672	-0.097511	NA
YMR043W	MCM1	7.29933	-0.275048	-0.16	7.61081	-0.0884684	NA	7.43807	-0.114312	NA
YMR049C	ERB1	7.39589	-0.0331752	NA	7.39306	0.0301967	NA	7.52366	-0.113823	NA
YMR054W	STV1	6.81378	0.00181481	NA	7.07103	0.0382952	NA	6.93442	-0.00402375	NA
YMR056C	AAC1	5.0375	-0.022793	NA	5.92017	-0.0610887	NA	5.42783	-0.104003	NA
YMR062C	ARG7	5.66413	-0.0298618	NA	5.34541	-0.186962	NA	5.62712	-0.0559428	NA
YMR064W	AEP1	5.98471	-0.0759608	NA	5.87378	0.146444	NA	6.23885	-0.0742094	NA
YMR067C	UBX4	6.39414	-0.0147458	NA	6.5554	0.0290576	NA	6.37008	-0.0265517	NA
YMR070W	MOT3	7.07298	0.0274808	NA	7.23988	-0.140922	NA	7.31307	-0.0387341	NA
YMR073C	IRC21	6.54109	-0.0667179	NA	6.10183	0.00540088	NA	6.44462	-0.0256904	NA
YMR076C	PDS5	5.97943	-0.101885	NA	5.47222	-0.0978283	NA	6.12472	-0.188872	NA
YMR079W	SEC14	8.6797	-0.289733	-0.183	8.63985	0.0305748	NA	8.73615	-0.163159	NA
YMR081C	ISF1	4.33533	0.0205776	NA	5.37965	0.0105103	NA	4.9308	0.00776447	NA
YMR083W	ADH3	9.69212	-0.00297033	NA	9.06451	0.0132546	NA	9.12933	-0.002051	NA
YMR085W		3.5257	0.117305	NA	4.12876	0.0911296	NA	3.91021	0.143374	NA
YMR086W	SEG1	5.66412	-0.168178	-0.083	5.42681	0.13281	NA	5.65941	-0.024064	NA
YMR088C	VBA1	6.3643	-0.00444703	NA	6.45917	0.0133363	NA	6.33432	0.0218175	NA
YMR091C	NPL6	5.23082	-0.0179063	NA	5.14636	-0.0102392	NA	5.18706	-0.0286312	NA
YMR096W	SNZ1	6.43296	-0.120015	-0.021	6.44097	-0.00483699	NA	5.84902	-0.11537	NA
YMR098C	ATP25	5.47308	-0.031921	NA	5.27798	0.0606052	NA	5.6618	-0.0611348	NA
YMR099C		7.11251	-0.0704491	-0.029	6.78558	0.0862859	NA	6.81416	0.0263055	NA
YMR100W	MUB1	6.4663	0.0263417	NA	6.23947	0.0361963	NA	6.52818	-0.000263472	NA
YMR103C		6.59611	-0.0940794	NA	7.50636	-0.236721	NA	6.97093	-0.114163	NA
YMR110C	HFD1	6.31369	-0.14792	-0.037	6.7615	0.0850507	NA	6.56369	-0.0735072	NA
YMR114C		4.03762	-0.00857639	NA	4.2382	0.053883	NA	4.3426	0.0727841	NA
YMR116C	ASC1	10.434	-0.0183977	NA	9.61294	0.0642822	NA	10.2687	-0.023758	NA
YMR121C	RPL15B	7.21328	0.00371428	NA	7.5244	0.00284315	NA	7.43478	0.00642429	NA
YMR122W-A		11.1065	0.00482714	0.001	11.096	-0.000535937	NA	11.0056	-0.00252674	NA
YMR123W	PKR1	7.90982	-0.00900084	NA	7.42626	-0.00968386	NA	7.8944	-0.00146414	NA
YMR128W	ECM16	5.30708	-0.0407171	NA	5.10924	0.025566	NA	5.37287	-0.0385229	NA
YMR129W	POM152	5.63219	-0.00800229	NA	5.28849	-0.0242438	NA	5.54976	0.00502686	NA
YMR130W		6.53746	-0.0082627	NA	6.57009	0.00202101	NA	7.01889	-0.0581806	NA
YMR134W	ERG29	6.77004	0.0715187	NA	7.10285	0.217125	NA	7.20992	-0.00956266	NA
YMR135C	GID8	5.76387	-0.0643636	NA	5.40967	-0.0890402	NA	5.5904	0.0134702	NA
YMR137C	PSO2	5.9808	0.0103234	NA	5.10927	0.11544	NA	5.84655	-0.0375966	NA
YMR139W	RIM11	5.22174	-0.453965	-0.298	5.37385	-0.212125	NA	5.26314	-0.16069	NA
YMR144W		5.19837	-0.0309866	NA	5.34803	0.0562552	NA	5.49579	-0.0258596	NA
YMR145C	NDE1	8.44348	0.129026	0.038	9.20328	0.19309	NA	9.36279	-0.0899026	NA
YMR153W	NUP53	5.85423	-0.0157897	NA	5.50473	0.179034	NA	5.92842	0.0129529	NA
YMR155W		5.03414	0.00552835	NA	5.42365	-0.00997283	NA	5.11657	0.0107104	NA
YMR157C	AIM36	5.4522	-0.037338	NA	4.96322	-0.00451682	NA	5.28624	-0.0440201	NA
YMR161W	HLJ1	7.70329	-0.0564913	-0.02	7.38017	-0.0256667	NA	7.97425	0.0148848	NA
YMR162C	DNF3	5.6662	-0.180603	-0.055	5.35683	-0.0615413	NA	5.61404	-0.12546	NA
YMR163C	INP2	3.38128	0.193964	0.032	3.44635	0.139565	NA	3.47187	0.131139	NA
YMR170C	ALD2	6.5978	-0.0313703	NA	5.71039	0.0887851	NA	5.69694	0.00979278	NA
YMR173W-A		8.81886	-0.0268825	NA	8.78962	0.0368187	NA	8.82101	0.00921131	NA
YMR177W	MMT1	5.51884	-0.00984438	NA	5.1601	0.161903	NA	5.47976	-0.0302213	NA
YMR178W		7.01237	-0.0839853	NA	6.82017	0.0198823	NA	7.20795	0.0493172	NA
YMR180C	CTL1	4.86556	0.0344354	NA	5.01063	-0.0243758	NA	4.969	0.0782314	NA
YMR181C		6.42234	-0.0753102	-0.003	7.10633	0.034128	NA	6.05079	-0.0216864	NA
YMR183C	SSO2	7.7442	-0.162382	-0.073	7.57598	-0.00913003	NA	8.01414	-0.00251238	NA
YMR184W	ADD37	6.6725	0.00306746	NA	7.29591	-0.00321144	NA	7.08595	-0.000646631	NA
YMR186W	HSC82	11.014	0.000398147	NA	10.8865	0.0132984	NA	10.8566	0.000901659	NA
YMR187C		4.67022	-0.178208	-0.031	5.18852	-0.053562	NA	5.1424	-0.111967	NA
YMR189W	GCV2	8.74343	0.0119122	NA	7.88164	0.0666609	NA	7.4798	-0.0135573	NA
YMR190C	SGS1	5.56398	-0.209702	-0.103	5.89959	0.00312334	NA	5.85901	-0.115934	NA
YMR192W	GYL1	5.36523	-0.0395078	NA	5.17581	0.0616997	NA	5.51423	-0.00774368	NA
YMR193W	MRPL24	6.5878	0.0223704	NA	6.21397	0.0239893	NA	6.80297	0.0034889	NA
YMR194C-B	CMC4	5.7627	0.0169201	NA	6.52759	-0.159358	NA	7.00481	-0.0562393	NA
YMR194W	RPL36A	11.0301	-0.0009537	NA	10.8771	-0.00221115	NA	10.8941	-0.00172489	NA
YMR197C	VTI1	6.59755	0.00323739	NA	6.87857	0.0166357	NA	6.70683	0.00371737	NA
YMR198W	CIK1	4.61911	-0.0265486	NA	4.62184	-0.0317856	NA	4.84974	-0.0602999	NA
YMR200W	ROT1	7.81624	-0.143968	-0.053	8.1513	0.129339	NA	7.94672	-0.0953406	NA
YMR201C	RAD14	5.21549	-0.163069	-0.036	4.58003	0.232158	NA	5.41591	-0.0847455	NA
YMR203W	TOM40	7.89644	-0.0825773	NA	7.54928	-0.118336	NA	7.86511	-0.00136313	NA
YMR204C	INP1	3.93285	-0.0273198	NA	4.01856	0.0671745	NA	3.9369	0.0734012	NA
YMR205C	PFK2	9.30404	-0.147186	-0.064	9.07711	0.00154469	NA	9.09272	-0.0220076	NA
YMR206W		2.63837	-0.0967742	NA	2.80714	0.0338974	NA	2.72222	0.202331	NA
YMR209C		5.06218	0.0361553	NA	5.05962	-0.217572	NA	5.42272	0.0320555	NA
YMR211W	DML1	4.20999	-2.44738e-05	NA	4.61422	-0.0519276	NA	4.66273	-0.0494845	NA
YMR212C	EFR3	8.64165	-0.00301486	NA	8.15455	0.0270117	NA	8.74411	-0.0100208	NA
YMR214W	SCJ1	7.2805	-0.0777472	-0.034	7.37228	-0.0346724	NA	7.48306	-0.0449552	NA
YMR215W	GAS3	7.37985	0.0245718	NA	7.59772	-0.0216216	NA	7.65935	0.00270774	NA
YMR216C	SKY1	6.98059	-0.0803579	NA	6.92521	-0.0438529	NA	7.11988	-0.0479915	NA
YMR217W	GUA1	8.25902	0.0118161	0.001	8.42964	-0.00076847	NA	8.10445	0.0057987	NA
YMR218C	TRS130	5.58479	-0.0467758	NA	5.57378	0.0202804	NA	5.72799	-0.00192283	NA
YMR220W	ERG8	7.50224	-0.168243	-0.061	7.93071	0.174825	NA	7.80155	-0.0472039	NA
YMR221C		6.96867	0.0582382	NA	7.273	-0.0138348	NA	7.11311	0.0484164	NA
YMR223W	UBP8	4.7145	-0.0488434	NA	4.67753	0.000539552	NA	4.72364	-0.0449509	NA
YMR224C	MRE11	4.02841	-0.152809	NA	3.90279	-0.265358	NA	4.11051	-0.0488429	NA
YMR228W	MTF1	5.30573	-0.0463478	-0.014	5.5402	0.0133825	NA	5.5429	-0.0462382	NA
YMR229C	RRP5	7.52574	0.00345614	NA	6.87873	0.0780684	NA	7.56268	0.011445	NA
YMR232W	FUS2	3.72039	0.0473646	NA	3.85681	0.0559234	NA	3.89956	0.0895674	NA
YMR233W	TRI1	4.4384	0.0271821	NA	4.32517	0.0408491	NA	4.52926	0.0494862	NA
YMR235C	RNA1	7.67816	0.00682572	NA	7.30842	0.151057	NA	7.56086	0.0267998	NA
YMR236W	TAF9	9.57921	-0.0387197	-0.017	9.39734	-0.000279103	NA	9.53854	-0.0211345	NA
YMR237W	BCH1	7.33366	-0.0153012	-0.002	7.54968	0.00336482	NA	7.29645	0.000201238	NA
YMR241W	YHM2	8.27582	-0.116237	-0.068	8.15271	-0.0857848	NA	8.13676	-0.0962414	NA
YMR242C	RPL20A	10.2853	0.000752938	NA	10.347	0.00362841	NA	10.0739	0.00319723	NA
YMR243C	ZRC1	7.62524	-0.0692997	NA	7.09735	-0.163406	NA	7.599	-0.0764052	NA
YMR244C-A	COA6	6.48975	-0.0177402	NA	5.80414	0.0226312	NA	6.43827	-0.0351923	NA
YMR246W	FAA4	8.88447	-0.186601	-0.106	8.95563	0.0494682	NA	8.66785	-0.0394448	NA
YMR250W	GAD1	6.5429	-0.0162117	NA	6.24497	0.0499499	NA	6.55339	-0.014444	NA
YMR251W-A	HOR7	10.3757	0.0264897	NA	10.2737	-0.0116986	NA	10.4183	0.0116966	NA
YMR255W	GFD1	6.17131	-0.206517	-0.08	6.51684	-0.361093	NA	6.45527	-0.111511	NA
YMR256C	COX7	8.31875	-0.10105	-0.022	8.8838	0.0705507	NA	8.78953	-0.0386602	NA
YMR257C	PET111	5.3153	-0.097752	NA	5.30856	-0.0141186	NA	5.53514	-0.0613208	NA
YMR258C	ROY1	6.59303	-0.000951759	NA	6.50481	0.0253051	NA	6.63883	-0.0354414	NA
YMR259C	TRM732	5.52043	0.0330968	NA	5.5075	0.119952	NA	5.5565	0.0254847	NA
YMR262W		5.12769	-0.155497	-0.015	5.39117	-0.104055	NA	5.4172	-0.0579518	NA
YMR263W	SAP30	5.05757	-0.0305307	NA	4.7149	0.00440921	NA	5.07631	-0.0266513	NA
YMR264W	CUE1	6.07605	0.00468417	NA	6.56533	-0.0128989	NA	6.18345	0.00142189	NA
YMR265C		4.08626	-0.1409	-0.01	4.7134	0.150756	NA	4.26584	-0.0249207	NA
YMR269W	TMA23	5.15372	-0.0144746	NA	4.74664	0.0833619	NA	5.12286	-0.0117125	NA
YMR271C	URA10	3.45376	-0.0398958	NA	2.9234	-0.11761	NA	2.93569	-0.0180862	NA
YMR282C	AEP2	5.553	-0.0111937	NA	5.47102	0.135839	NA	5.60267	-0.071814	NA
YMR289W	ABZ2	5.50145	-0.0117263	NA	5.17246	0.0108846	NA	5.51809	0.0219793	NA
YMR290C	HAS1	7.6489	-0.0677814	NA	7.1568	-0.231317	NA	7.75153	0.0623384	NA
YMR295C		7.85801	-0.00117873	NA	7.76911	0.0438005	NA	7.96312	0.00134989	NA
YMR300C	ADE4	7.06283	-0.123485	-0.03	7.08409	0.220664	NA	6.8382	-0.100658	NA
YMR302C	YME2	6.94188	-0.0591809	-0.003	6.8761	-0.0203525	NA	7.16617	-0.0118215	NA
YMR304W	UBP15	7.64982	-0.00119883	NA	7.62984	-0.0646069	NA	7.71788	-0.0307376	NA
YMR307W	GAS1	10.2826	0.0125426	NA	10.0877	0.0599127	NA	10.3327	0.01074	NA
YMR308C	PSE1	8.2471	-0.016719	-0.005	7.28175	0.0789005	NA	7.97622	-0.0134783	NA
YMR309C	NIP1	8.15043	-0.0627346	-0.007	8.12617	0.0205522	NA	8.24373	0.019692	NA
YMR314W	PRE5	7.42957	-0.0546806	-0.022	7.62665	-0.0463852	NA	7.65037	-0.0528348	NA
YMR316W	DIA1	4.9711	-0.0939832	-0.004	5.25041	0.0586705	NA	4.99596	-0.00952326	NA
YMR319C	FET4	7.29119	-0.000857658	NA	7.05488	0.0231979	NA	6.94836	0.00128498	NA
YNL002C	RLP7	8.26142	0.00404046	NA	7.76507	0.0239605	NA	8.41826	-0.00347668	NA
YNL003C	PET8	4.93881	-0.107857	-0.021	4.85392	-0.0684854	NA	5.18064	-0.0588565	NA
YNL004W	HRB1	7.2153	-0.0214656	NA	6.91469	-0.0776103	NA	7.46888	-0.0152786	NA
YNL005C	MRP7	6.10468	0.00605986	NA	6.10611	0.115482	NA	6.31075	0.0240122	NA
YNL006W	LST8	7.26426	-0.201801	-0.104	6.99682	-0.0871767	NA	7.58907	-0.111036	NA
YNL009W	IDP3	3.15348	0.0727729	NA	3.12409	0.271004	NA	2.87227	0.0374084	NA
YNL011C		5.41639	-0.0183367	NA	5.76142	-0.0173181	NA	5.59849	-0.00292294	NA
YNL012W	SPO1	4.66634	0.00194699	NA	3.76206	0.0414294	NA	4.47073	-0.0119621	NA
YNL016W	PUB1	7.92116	0.0262045	NA	8.115	-0.0865698	NA	8.13324	-0.0941792	NA
YNL021W	HDA1	4.98295	-0.0427666	NA	4.75928	0.0282147	NA	4.84963	-0.0626144	NA
YNL022C	RCM1	5.41823	0.00526512	NA	5.5138	-0.0919101	NA	5.56124	-0.0442438	NA
YNL023C	FAP1	4.89053	0.0107753	NA	5.11071	-0.0149172	NA	4.94868	0.159073	NA
YNL024C-A	KSH1	8.04883	-0.0261432	NA	8.12182	0.0398385	NA	8.00068	-0.00112646	NA
YNL025C	SSN8	3.56962	-0.0213796	NA	3.30233	-0.0134614	NA	3.24771	0.0970651	NA
YNL026W	SAM50	5.98841	-0.0461938	-0.004	6.4979	-0.0457083	NA	6.03177	-0.0434207	NA
YNL031C	HHT2	11.388	0.0025068	NA	11.2292	0.0237888	NA	11.5755	-0.000730011	NA
YNL032W	SIW14	4.33942	-0.012009	NA	4.33853	0.136949	NA	4.43951	0.0430697	NA
YNL037C	IDH1	7.96655	-0.00738093	NA	8.15192	0.0308959	NA	7.82207	0.00236845	NA
YNL039W	BDP1	6.29848	-0.0242287	NA	6.04741	-0.0332483	NA	6.18818	-0.0183069	NA
YNL040W		6.70966	-0.00788047	NA	6.21343	0.0199222	NA	5.86217	0.0217275	NA
YNL041C	COG6	6.3272	-0.031681	NA	6.31175	0.00701449	NA	6.33448	-0.0293362	NA
YNL042W	BOP3	5.66131	0.0211651	NA	5.7166	0.0392551	NA	5.61505	0.0122463	NA
YNL044W	YIP3	7.25889	-0.0457192	NA	7.48391	0.122653	NA	7.48042	-0.0386882	NA
YNL045W	LAP2	7.38869	-0.0520402	NA	7.0844	0.0109541	NA	7.30728	0.0415975	NA
YNL049C	SFB2	7.07873	-0.0207691	NA	6.86728	0.0762364	NA	7.17962	-0.0248829	NA
YNL053W	MSG5	5.95063	-0.00686765	NA	5.85665	0.0175676	NA	6.06742	-0.0070767	NA
YNL055C	POR1	10.0924	-0.0609789	NA	10.0888	-0.170333	NA	10.0534	-0.0515111	NA
YNL056W	OCA2	6.91093	-0.00930185	NA	6.81572	-0.0180501	NA	7.18965	0.02101	NA
YNL058C		6.01825	-0.0143436	-0.002	5.98972	0.0357432	NA	6.13189	0.0131469	NA
YNL059C	ARP5	5.51583	-0.0434663	NA	5.45144	-0.103168	NA	5.59477	-0.140035	NA
YNL062C	GCD10	5.82075	-0.0238553	NA	5.90146	0.0164157	NA	6.03688	-0.000867443	NA
YNL064C	YDJ1	8.61905	-0.0481779	-0.012	8.55672	0.13624	NA	8.77306	-0.0356597	NA
YNL066W	SUN4	7.6264	-0.0238713	NA	7.43763	0.0112771	NA	7.87361	0.0094899	NA
YNL067W	RPL9B	9.8154	-0.102799	-0.023	9.46844	0.145933	NA	9.57629	-0.0107773	NA
YNL069C	RPL16B	10.576	-0.00304697	-0.001	10.4011	0.00364679	NA	10.3428	-0.00168161	NA
YNL071W	LAT1	8.80844	-0.018344	NA	8.12835	0.0439398	NA	8.94961	0.0716523	NA
YNL074C	MLF3	6.45419	-0.0757653	-0.006	6.56309	0.0975997	NA	6.49441	-0.0801625	NA
YNL076W	MKS1	5.4197	-0.0372267	NA	5.28115	-0.0158423	NA	5.19909	-0.0292911	NA
YNL078W	NIS1	6.68092	-0.100597	-0.007	6.64573	-0.214253	NA	6.50722	-0.135979	NA
YNL079C	TPM1	8.95829	-0.00137793	NA	9.30503	-0.000735675	NA	9.14365	0.000974863	NA
YNL080C	EOS1	7.27344	0.00704329	NA	7.59019	0.0550401	NA	7.32739	0.00880902	NA
YNL081C	SWS2	7.66444	-0.0108703	NA	7.26299	-0.0106774	NA	7.93621	0.0149218	NA
YNL084C	END3	5.97759	-0.0206403	NA	5.4949	0.143042	NA	5.71355	-0.0129145	NA
YNL085W	MKT1	8.069	0.00104287	NA	7.67616	0.00283824	NA	7.8037	-0.00695306	NA
YNL086W	SNN1	5.64201	0.00399188	NA	5.72207	-0.130754	NA	5.77292	-0.028021	NA
YNL087W	TCB2	5.99791	-0.101235	NA	5.88257	-0.215095	NA	6.18062	-0.165487	NA
YNL088W	TOP2	6.55389	-0.20348	-0.108	6.02711	-0.126051	NA	6.44836	-0.189435	-0.008
YNL090W	RHO2	5.82879	-0.499984	-0.344	6.62987	0.055501	NA	6.23057	-0.0921519	NA
YNL091W	NST1	7.25639	-0.000748281	NA	7.60888	-0.0280598	NA	7.41259	-0.0120927	NA
YNL092W		4.72435	-0.131898	NA	5.17862	-0.11287	NA	4.99439	-0.0613098	NA
YNL094W	APP1	8.09731	-0.0731259	NA	7.8306	-0.21229	NA	8.13242	-0.147827	NA
YNL095C		4.07484	0.0222365	NA	4.43424	-0.0391588	NA	4.17627	-0.0193573	NA
YNL096C	RPS7B	9.19463	0.00099048	NA	8.57073	-0.00552149	NA	8.96152	0.00452611	NA
YNL098C	RAS2	8.20413	-0.109399	-0.024	8.35116	-0.25262	NA	8.45723	-0.151927	NA
YNL099C	OCA1	6.62758	-0.045622	NA	6.24821	-0.0560011	NA	6.73574	-0.0463841	NA
YNL101W	AVT4	6.42711	0.0221513	NA	7.03066	0.00944842	NA	6.57276	-0.00139125	NA
YNL106C	INP52	4.49291	0.0505818	NA	4.76261	0.0801462	NA	4.79008	0.0589478	NA
YNL111C	CYB5	7.6119	-0.0116928	NA	7.96042	0.012282	NA	8.15807	0.00113248	NA
YNL114C		1.72685	0.0992307	NA	1.65228	-0.189842	NA	2.00425	0.0478353	NA
YNL115C		6.12657	-0.00516889	NA	6.31115	0.0443111	NA	6.17666	-0.016714	NA
YNL119W	NCS2	5.5882	-0.0118556	NA	6.01437	0.1902	NA	5.90307	0.00920013	NA
YNL121C	TOM70	7.47799	-0.18507	-0.078	7.26366	0.114212	NA	7.30008	0.0248443	NA
YNL122C		6.6317	-0.0543534	NA	6.79119	0.000370523	NA	6.82999	-0.0196238	NA
YNL126W	SPC98	5.59673	-0.132183	-0.021	5.57237	-0.31056	NA	5.92421	-0.116203	NA
YNL127W	FAR11	7.48201	0.0359227	NA	6.92663	-0.0325872	NA	7.30449	-0.00830039	NA
YNL129W	NRK1	5.50028	0.0196731	NA	5.17866	0.199582	NA	5.21805	0.0100664	NA
YNL130C	CPT1	8.37512	-0.0595891	-0.006	7.80983	0.0359733	NA	8.48357	-0.00176301	NA
YNL131W	TOM22	7.97606	-0.192305	-0.094	8.02849	-0.0247515	NA	7.92231	-0.0934773	NA
YNL135C	FPR1	11.2636	0.0170879	NA	10.9374	0.0760499	NA	11.0871	0.0937739	NA
YNL136W	EAF7	6.44599	-0.0273819	NA	5.74934	-0.127967	NA	6.46055	-0.0670635	NA
YNL137C	NAM9	6.48711	-0.112992	-0.005	6.16539	0.0470665	NA	6.7276	-0.0407329	NA
YNL138W	SRV2	6.70852	0.0310296	NA	6.29686	0.0171849	NA	6.50093	-0.00306203	NA
YNL138W-A	YSF3	6.22242	0.0623419	NA	6.1922	-0.113787	NA	6.40395	0.0811539	NA
YNL139C/YNL140C	THO2	5.58699	-0.0539625	NA	5.0817	-0.00632209	NA	5.38547	-0.0171947	NA
YNL141W	AAH1	7.02954	-0.047598	NA	6.68185	0.0298994	NA	7.10887	-0.0636756	NA
YNL145W	MFA2	7.27485	0.0225651	NA	10.1224	0.00820743	NA	9.79545	0.00535664	NA
YNL146W		3.66816	-0.183808	-0.006	3.70786	-0.238756	NA	3.44937	0.0451745	NA
YNL149C	PGA2	7.14313	-0.00615278	NA	6.86204	-0.00122691	NA	7.43098	-0.00512534	NA
YNL151C	RPC31	7.02342	-0.005431	NA	6.72772	0.0736391	NA	7.06311	0.0415253	NA
YNL152W	INN1	5.26412	0.0471215	NA	4.86556	0.150158	NA	5.42375	0.0547886	NA
YNL153C	GIM3	7.56582	-0.00022693	NA	7.17521	0.0846799	NA	7.53293	0.0206333	NA
YNL154C	YCK2	6.32743	-0.115996	-0.005	6.12953	-0.201241	NA	6.379	-0.0905358	NA
YNL156C	NSG2	6.73542	-0.223253	-0.105	6.89459	0.0257573	NA	6.97301	-0.075386	NA
YNL157W	IGO1	7.01211	-0.0199685	NA	7.19976	-0.0366177	NA	7.18806	-0.025721	NA
YNL159C	ASI2	4.05819	-0.10683	NA	3.87892	-0.0775874	NA	3.73511	-0.178093	NA
YNL161W	CBK1	7.04022	-0.27466	-0.152	6.61469	-0.114861	NA	7.08342	-0.155968	NA
YNL162W-A		4.99066	0.0995142	0.008	5.22578	0.136013	NA	5.27975	0.0495254	NA
YNL163C	RIA1	5.41491	-0.00453001	NA	4.97999	0.0209758	NA	5.34042	0.00229829	NA
YNL164C	IBD2	7.34022	-0.0455036	NA	6.61561	0.0853627	NA	7.35285	-0.0363548	NA
YNL165W		4.77249	-0.0896956	NA	5.04347	0.190649	NA	5.07437	0.0173195	NA
YNL168C	FMP41	6.78504	-0.040788	NA	6.73695	-0.0642186	NA	6.64177	-0.0320832	NA
YNL174W		1.12056	-0.167245	NA	3.19548	0.107744	NA	2.29476	0.0417511	NA
YNL176C	TDA7	5.86339	0.00142683	NA	5.72889	0.0635235	NA	6.15913	0.0316699	NA
YNL177C	MRPL22	5.11134	-0.0375701	NA	5.10848	-0.05749	NA	5.35196	-0.0305649	NA
YNL178W	RPS3	10.5552	0.00409847	NA	10.64	0.00264475	NA	10.5238	0.00237248	NA
YNL183C	NPR1	5.75233	-0.0113778	NA	5.97007	0.134062	NA	6.09155	0.0288654	NA
YNL185C	MRPL19	6.60115	0.015525	NA	6.19265	0.0255055	NA	6.66038	-0.0602802	NA
YNL186W	UBP10	7.00426	0.0206468	NA	6.88287	-0.10842	NA	7.20033	0.0685888	NA
YNL187W	SWT21	4.77156	0.0861431	NA	5.03521	0.0134437	NA	4.94617	-0.0198394	NA
YNL189W	SRP1	7.582	-0.00278725	NA	7.26979	0.0595185	NA	7.38616	0.0434732	NA
YNL193W		5.18418	0.0112496	NA	4.91789	0.000790856	NA	5.0844	-0.00278745	NA
YNL197C	WHI3	4.38565	0.128142	NA	4.13838	0.137245	NA	4.22281	0.0912226	NA
YNL199C	GCR2	6.08183	-0.185813	-0.062	5.84862	-0.0642693	NA	5.97402	-0.154662	NA
YNL206C	RTT106	5.84902	-0.0601198	-0.013	5.12218	0.11862	NA	5.49972	-0.0048841	NA
YNL207W	RIO2	5.69381	0.010776	NA	5.6275	0.0271249	NA	5.64804	0.023121	NA
YNL208W		9.7984	0.000699665	NA	9.91967	0.00354185	NA	9.86085	-0.00020165	NA
YNL213C	RRG9	6.54197	-0.00934006	NA	5.90086	0.0288888	NA	6.69503	-0.00220143	NA
YNL215W	IES2	7.06833	-0.0128149	NA	6.69884	-0.00822543	NA	7.11776	-0.0161012	NA
YNL216W	RAP1	5.48426	-0.248114	-0.096	5.15214	-0.00257875	NA	5.21767	-0.0995367	NA
YNL218W	MGS1	4.6939	-0.127759	NA	4.59347	-0.280533	NA	4.79175	-0.0229817	NA
YNL219C	ALG9	5.66403	0.0214094	NA	5.59124	0.0538455	NA	5.6809	-0.0272289	NA
YNL220W	ADE12	6.94334	-0.0242992	-0.004	6.69947	0.0364763	NA	6.67827	0.000766266	NA
YNL221C	POP1	6.01423	-0.131788	-0.036	5.9503	-0.142676	NA	6.0536	-0.171089	NA
YNL222W	SSU72	6.12717	0.0160831	NA	6.00138	0.0172161	NA	5.94798	0.0401399	NA
YNL225C	CNM67	4.54968	-0.0775306	NA	4.27863	-0.0558909	NA	4.61562	-0.0339595	NA
YNL229C	URE2	7.1778	-0.0911729	NA	7.14774	-0.149902	NA	7.47495	-0.0938085	NA
YNL232W	CSL4	6.3272	0.0966452	0.013	6.63558	-0.0494225	NA	6.53442	-0.00144472	NA
YNL233W	BNI4	6.17122	-0.0124165	NA	5.81253	-0.0051941	NA	6.08999	-0.0102329	NA
YNL234W		4.66101	0.000539731	NA	4.96303	-0.027188	NA	5.01989	-0.0246728	NA
YNL242W	ATG2	5.55579	-0.145399	-0.069	6.04494	-0.0180569	NA	5.87886	-0.0417568	NA
YNL246W	VPS75	6.52222	0.00648338	NA	6.17469	-0.0200199	NA	6.57958	-0.0142595	NA
YNL248C	RPA49	7.31735	-0.0196724	NA	6.84367	0.0451059	NA	7.31815	-0.0533162	NA
YNL249C	MPA43	2.42696	0.0876008	NA	2.80472	-0.0823386	NA	2.62869	-0.00982034	NA
YNL251C	NRD1	8.74512	-0.0492841	NA	9.21654	-0.0746524	NA	9.83428	0.000330188	NA
YNL255C	GIS2	8.11488	-0.149482	-0.052	8.1581	-0.00506356	NA	8.12588	-0.0342787	NA
YNL260C	LTO1	6.67866	-0.0240481	NA	6.75328	-0.0142041	NA	6.97387	-0.0256809	NA
YNL261W	ORC5	6.51891	0.00873603	NA	6.80058	-0.0481635	NA	6.56742	0.0191233	NA
[truncated: 485 more rows]
