# Supplementary material for: Genetic and pharmacological evidence for kinetic competition between alternative poly(A) sites in yeast
Source: eLife. 2021 Jul 7;10:e65331. doi: 10.7554/eLife.65331 (PMC8263057; doi:10.7554/eLife.65331)
Supplement: Figure 4—source data 1. — The full list of genes undergoing APA in the cordycepin treatment PAT-assay experiment and their effect size and confect values. [file elife-65331-fig4-data1.xlsx]

## Sheet: Sheet1
name	gene	t5 average expression	t5 effect value	t5 confect value	t10 average expression	t10 effect value	t10 confect value	t20 average expression	t20 effect value	t20 confect value	t40 average expression	t40 effect value	t40 confect value
SRG1/YER081W	SER3/SRG1	8.20005	0.0115484	NA	8.32626	0.0252992	0.01	8.45123	0.0673804	0.046	8.47661	0.158429	0.128
YAL003W	EFB1	11.521	0.011822	NA	11.5405	0.0270116	0.002	11.6449	0.0359236	0.012	11.7417	0.0437396	0.025
YAL007C	ERP2	7.41979	0.0139918	NA	7.39042	0.0213756	NA	7.25501	-0.0104839	NA	6.88827	0.00829415	NA
YAL015C	NTG1	5.49882	0.0834364	NA	5.5121	0.0733404	NA	5.28743	0.0226087	NA	5.54647	0.0381829	NA
YAL016W	TPD3	7.80629	-0.000917037	NA	7.81547	-8.59762e-05	NA	7.79004	0.00803021	0.001	7.86625	0.0125689	0.005
YAL017W	PSK1	4.99834	-0.00544065	NA	5.03478	0.0189058	NA	5.04189	0.144115	0.089	5.47887	0.325128	0.261
YAL019W	FUN30	5.90559	0.000622602	NA	5.90426	0.133651	0.076	5.95244	0.481011	0.388	6.10793	0.702507	0.626
YAL020C	ATS1	6.35921	0.016486	NA	6.23417	0.0108087	NA	5.94684	0.0144972	NA	5.66483	0.0528053	0.016
YAL021C	CCR4	6.39972	0.00790627	NA	6.20988	0.0101629	NA	5.85431	0.0502103	NA	5.50111	0.0441931	NA
YAL024C	LTE1	5.18452	0.00761115	NA	5.08133	0.0765284	0.026	4.98127	0.15357	0.092	4.85706	0.197229	0.126
YAL029C	MYO4	7.06062	0.0233983	NA	7.05053	0.0973354	0.031	6.92798	0.253515	0.173	6.91176	0.376093	0.304
YAL031C	GIP4	4.58697	-0.0648583	NA	4.46968	-0.0812578	NA	4.25475	-0.226748	-0.1	4.46937	-0.418187	-0.298
YAL035W	FUN12	7.5594	0.000211888	NA	7.5146	0.0071726	NA	7.60604	0.0296652	0.018	7.51073	0.122871	0.098
YAL036C	RBG1	6.34659	0.0203323	NA	6.32875	0.00844789	NA	6.11477	0.0391861	0.014	5.85333	0.0592646	0.024
YAL037W		2.54705	0.0764612	NA	2.6073	0.0584793	NA	3.03886	0.19789	0.033	3.79489	0.120069	NA
YAL038W	CDC19	11.8083	-0.000207408	NA	11.8976	0.000340757	NA	11.9935	0.00691128	0.005	12.2138	0.0211384	0.018
YAL040C	CLN3	6.24089	0.0836225	0.005	6.08532	0.170055	0.077	5.78281	0.146289	0.066	5.78993	0.144767	0.072
YAL041W	CDC24	7.14503	0.0150406	NA	7.03375	0.136197	0.086	6.69294	0.34645	0.276	6.551	0.446383	0.379
YAL043C	PTA1	6.32104	-0.00184222	NA	6.23406	0.0305524	0.007	5.97386	0.0767832	0.044	5.68723	0.132172	0.084
YAL051W	OAF1	5.23776	0.00752019	NA	5.27526	0.0712528	0.017	5.35515	0.0690325	0.019	5.31858	0.0471418	NA
YAL056W	NA	NA	NA	NA	NA	NA	NA	5.27164	0.110982	0.07	5.39098	0.142282	0.101
YAL058W	CNE1	4.98329	-0.00155451	NA	4.98503	-0.014651	NA	4.59236	-0.0109379	NA	4.06266	0.150514	0.016
YAL061W	BDH2	2.47949	0.0427581	NA	1.68353	0.20944	NA	1.49141	0.133425	NA	2.09937	0.210771	NA
YAR002C-A	ERP1	7.85158	0.0195194	NA	7.84518	0.0168684	NA	7.90293	0.0219517	NA	7.69648	0.0616821	0.035
YAR002W	NUP60	6.68141	0.0283028	NA	6.54133	0.0793952	0.032	6.29265	0.0913966	0.045	6.23234	0.147153	0.096
YAR009C		9.45022	0.0874325	0.021	9.42556	0.0895832	0.025	9.64765	0.0410882	NA	9.80073	0.0599979	0.011
YAR015W	ADE1	9.27793	0.00391739	NA	9.2388	0.00297719	NA	9.08148	0.0120647	0.005	8.75083	0.0238118	0.015
YAR018C	KIN3	5.40396	0.00949469	NA	5.30652	-0.00207336	NA	4.81496	0.0477409	NA	4.61168	0.127068	0.038
YAR019C	CDC15	4.93112	0.0498884	NA	5.02244	0.120744	0.018	4.91902	0.269914	0.156	4.90643	0.408892	0.306
YAR027W	UIP3	5.40968	0.0267617	NA	5.40501	0.0362424	NA	5.17736	0.0170883	NA	5.04072	0.0709112	0.02
YAR028W		4.66256	-0.00853717	NA	4.26544	-0.00284009	NA	3.7857	-0.00119733	NA	3.54944	0.087298	NA
YAR029W		3.7189	0.042979	NA	3.65404	0.0968347	NA	3.64323	0.128634	NA	3.76933	0.163229	0.037
YAR035W	YAT1	3.30023	-0.000949304	NA	3.19913	0.0336283	NA	3.24994	0.0917763	NA	2.97152	0.347686	0.169
YAR042W	SWH1	5.50906	-0.0275435	NA	5.14532	-0.0190666	NA	4.60711	-0.0399031	NA	4.17188	0.0147069	NA
YBL001C	ECM15	9.11557	-0.0321066	-0.002	9.09012	-0.0224738	NA	8.97386	-0.0107243	NA	8.79086	-0.0399102	-0.017
YBL002W	HTB2	11.1802	0.0106242	NA	11.1866	0.0619266	0.027	11.0323	0.232805	0.178	10.8157	0.326272	0.277
YBL003C	HTA2	11.1834	0.0012702	NA	11.1897	0.0194194	0.012	11.0147	0.0733505	0.057	10.4503	0.203256	0.172
YBL004W	UTP20	6.02932	0.0351083	NA	6.01231	0.0687452	0.017	5.81488	0.172751	0.104	5.5972	0.280265	0.202
YBL005W-A/YBL005W-B		9.3994	0.0680972	0.007	9.37784	0.0766521	0.016	9.56615	0.0701771	0.013	9.65753	0.0571253	0.011
YBL006C	LDB7	8.50945	0.0178117	NA	8.41072	0.00755533	NA	8.11161	0.0168759	NA	7.96141	0.00677154	NA
YBL007C	SLA1	7.3568	0.0250958	NA	7.34414	0.031337	0.002	7.02296	0.214352	0.154	6.88244	0.320484	0.258
YBL008W	HIR1	4.53649	-0.0125778	NA	4.52549	0.123415	0.026	4.33911	0.495012	0.362	4.20909	0.632191	0.515
YBL010C		5.20491	0.0361675	NA	4.98216	0.0799093	NA	4.58829	0.158034	0.046	4.42666	0.131306	0.021
YBL011W	SCT1	5.02804	0.0103971	NA	4.94438	0.0458846	NA	4.79143	0.0940505	NA	4.6716	0.170023	0.089
YBL014C	RRN6	6.17574	-0.0112939	NA	6.0699	0.065009	0.021	5.65015	0.222051	0.147	5.50782	0.225104	0.154
YBL015W	ACH1	6.52148	0.00284221	NA	6.55456	-0.0157479	NA	6.61813	-0.0300425	NA	6.88134	-0.0457697	NA
YBL016W	NA	NA	NA	NA	NA	NA	NA	5.39675	0.0712906	0.04	5.33899	0.118069	0.071
YBL018C	POP8	5.78723	0.0298064	NA	5.67932	0.0325194	0.006	5.30009	0.0213596	NA	4.69981	0.100652	0.04
YBL022C	PIM1	6.60379	-0.00116251	NA	6.63849	0.0148658	0.003	6.59	0.0555279	0.036	6.59636	0.095114	0.069
YBL024W	NCL1	6.62971	0.0291312	NA	6.66326	0.127023	0.041	6.48118	0.206343	0.121	6.24043	0.241555	0.166
YBL026W	LSM2	7.66962	0.0040021	NA	7.62442	0.0165905	NA	7.31923	0.0581961	0.021	6.87422	0.114314	0.07
YBL027W	RPL19B	9.72698	0.00493069	NA	9.73987	0.0273325	NA	9.75436	0.0911105	0.056	9.76651	0.191279	0.152
YBL028C		6.62152	0.0277745	NA	6.54442	0.0254432	NA	6.28747	0.0251202	NA	6.04561	0.0574992	0.028
YBL029W		3.16002	0.0402611	NA	3.12152	0.272748	0.085	3.0669	0.438892	0.261	3.05137	0.624388	0.462
YBL030C	PET9	9.33462	0.00528343	NA	9.38699	0.00467132	NA	9.40415	-0.00740779	NA	9.63692	0.00631982	NA
YBL033C	RIB1	5.02689	0.023647	NA	4.90897	0.269854	0.141	4.80302	0.496468	0.366	4.95142	0.526723	0.424
YBL035C	POL12	4.9879	0.0469851	NA	4.6992	0.00147302	NA	4.07835	-0.00362416	NA	3.72134	0.0647184	NA
YBL039C/YBL039C-A	URA7	7.73917	0.0428327	NA	7.69501	0.0799192	0.026	7.42817	0.267943	0.199	7.15113	0.454093	0.384
YBL040C	ERD2	6.78886	0.0128868	NA	6.79818	0.113202	0.051	6.65968	0.241821	0.168	6.44543	0.34409	0.272
YBL041W	PRE7	6.34765	0.0736292	NA	6.31649	0.105295	0.023	6.1276	0.234893	0.143	6.1117	0.234005	0.156
YBL042C	FUI1	6.43237	-0.01392	NA	6.11324	-0.0132236	NA	5.55203	-0.137104	-0.045	5.46412	-0.181108	-0.09
YBL045C	COR1	8.41753	-0.000779262	NA	8.51004	0.0951406	0.036	8.54919	0.179782	0.126	9.02946	0.223323	0.181
YBL046W	PSY4	3.59951	0.009788	NA	3.41763	0.0615739	NA	3.42239	0.14072	0.032	3.80037	0.141477	0.047
YBL047C	EDE1	7.19853	-0.00936235	NA	7.10892	0.0313944	NA	6.92473	0.0468848	NA	6.90541	0.0853875	0.03
YBL050W	SEC17	6.50325	0.00625165	NA	6.506	0.0155591	0.001	6.5177	0.0559698	0.035	6.67235	0.064625	0.044
YBL051C	PIN4	5.41196	0.0750424	NA	5.2859	0.127365	0.027	5.23012	0.36154	0.256	5.52426	0.401327	0.317
YBL052C	SAS3	5.7305	-0.00517471	NA	5.64684	0.0258262	NA	5.62027	0.225981	0.163	5.66039	0.384046	0.314
YBL055C		4.07603	0.0332234	NA	3.98418	0.0474838	NA	3.52517	0.0339674	NA	3.02515	0.0237476	NA
YBL056W	PTC3	6.75355	0.0397927	NA	6.6965	0.0345065	NA	6.36942	0.0687452	NA	5.91774	0.0452796	NA
YBL059C-A	CMC2	5.16598	0.0182817	NA	5.0034	0.0103885	NA	4.43426	0.067484	NA	3.97039	-0.0219542	NA
YBL059W		3.95154	0.0169379	NA	3.57037	0.0585236	NA	3.35591	-0.0239141	NA	2.90501	0.0687344	NA
YBL066C	SEF1	5.29701	-0.00926856	NA	5.21209	0.0127053	NA	4.76247	0.0404849	NA	4.79826	0.0163558	NA
YBL067C	UBP13	4.42183	0.0554615	NA	4.40178	0.0699576	0.013	4.29384	0.132896	0.065	4.5318	0.174111	0.106
YBL068W	PRS4	6.68365	0.00124297	NA	6.6295	0.086662	0.028	6.37633	0.16522	0.099	6.11006	0.251845	0.181
YBL068W-A/YBL069W	AST1	5.32339	0.0735165	NA	5.30597	0.144632	0.045	5.17834	0.393941	0.288	5.11105	0.570472	0.479
YBL072C	RPS8A	10.8012	0.0293445	NA	10.8375	0.0441607	0.012	11.001	0.0327876	NA	11.1481	0.0323033	0.004
YBL076C	NA	NA	NA	NA	9.85765	0.000855337	NA	9.96347	0.00314772	0.001	9.96501	0.0241903	0.02
YBL078C	ATG8	2.37903	-0.018608	NA	1.87324	0.162096	NA	2.24525	0.0652727	NA	3.10566	-0.041216	NA
YBL079W	NUP170	9.38125	5.78996e-05	NA	9.31813	0.0118105	0.003	9.11655	0.0216887	0.012	9.08117	0.0401454	0.029
YBL081W		6.78889	0.0126622	NA	6.74998	0.0123175	NA	6.54844	0.0233256	NA	6.56493	0.00844497	NA
YBL084C	CDC27	3.42622	-0.00155208	NA	3.50431	0.392906	0.18	3.72658	0.599139	0.434	3.9576	0.681693	0.55
YBL087C	RPL23A	10.4648	0.00125594	NA	10.5642	0.00226956	0	10.6921	0.0161376	0.012	10.5894	0.0442609	0.038
YBL088C	TEL1	3.97275	0.0218141	NA	3.8925	0.116899	0.022	3.73318	0.0963553	0.015	3.49083	0.190876	0.067
YBL092W	RPL32	11.196	0.00916907	NA	11.2418	0.0281803	NA	11.3774	0.0292976	NA	11.2197	0.157786	0.113
YBL095W		5.83656	0.000450361	NA	5.64118	0.0110262	NA	5.30408	0.0587607	0.02	5.26551	0.0913315	0.044
YBL097W	BRN1	6.41847	-0.0209776	NA	6.46472	-0.055208	-0.022	6.60134	-0.0946014	-0.065	6.72838	-0.0892019	-0.065
YBL098W	BNA4	4.81434	0.00193245	NA	5.06832	0.00647043	NA	5.28773	0.0300801	0.011	6.02559	0.0719386	0.051
YBL099W	ATP1	8.30523	0.00484788	NA	8.38757	0.0370398	NA	8.40158	0.0622134	0.017	8.31896	0.0950843	0.057
YBL100W-A/YBL100W-B		3.83078	0.0789758	NA	3.80621	0.0726754	NA	3.72633	0.0737378	NA	3.77906	0.0277966	NA
YBL103C	RTG3	4.70534	-0.0135602	NA	4.42661	0.0368824	NA	4.03255	0.0508162	NA	3.88396	0.0445915	NA
YBL105C	PKC1	7.07824	-0.000217895	NA	6.83693	0.0163253	NA	6.24229	0.0463979	NA	6.00019	0.0299447	NA
YBR001C	NTH2	6.54984	-0.00270649	NA	6.41772	0.060476	NA	5.888	0.147194	0.061	5.58374	0.112154	0.03
YBR002C	RER2	6.02268	0.0527708	NA	5.94964	0.28468	0.18	5.76878	0.581684	0.476	5.78564	0.662163	0.58
YBR003W	COQ1	5.4457	0.00306896	NA	5.4756	0.0353011	0.01	5.38891	0.110425	0.07	5.50162	0.166557	0.121
YBR006W	NA	NA	NA	NA	4.87576	0.0273722	0.006	4.92248	0.0889554	0.053	5.17194	0.193356	0.145
YBR007C	DSF2	5.70074	0.0357233	NA	5.51562	0.228188	0.124	5.47239	0.37329	0.271	5.62392	0.454903	0.369
YBR008C	FLR1	3.91837	0.00129515	NA	3.82442	0.0781639	NA	3.45945	0.176429	0.065	3.60532	0.172601	0.067
YBR009C	HHF1	10.465	0.000708216	NA	10.4676	0.00542844	0.001	10.2574	0.0289381	0.021	9.93944	0.0864654	0.072
YBR010W	HHT1	11.6173	0.0161687	0.002	11.6285	0.0179766	0.005	11.4007	0.0210571	0.007	11.3341	0.0435776	0.032
YBR011C	IPP1	10.6554	0.0011104	NA	10.6303	0.00614669	0.003	10.8239	0.0303966	0.023	10.8619	0.0862839	0.073
YBR012C	NA	NA	NA	NA	5.89959	-0.00168132	NA	5.94836	0.0123705	NA	6.24845	0.0271605	0.012
YBR012W-A/YBR012W-B		7.05817	0.153568	0.061	6.99856	0.160657	0.076	7.11868	0.0524299	NA	7.27375	0.0614836	0.009
YBR014C	GRX7	7.06712	0.0419494	NA	6.92505	0.0568348	NA	6.5303	0.163938	0.088	6.28438	0.24317	0.166
YBR015C	MNN2	6.21733	-0.00239996	NA	6.20237	-0.00120651	NA	6.25931	0.0435209	0.026	6.26783	0.130369	0.098
YBR016W		6.91147	-0.0485609	-0.001	6.92355	-0.0487065	-0.006	6.79902	-0.0708958	-0.023	6.67254	-0.0694783	-0.02
YBR017C	KAP104	7.25511	0.0302378	NA	7.25815	0.144205	0.058	7.22218	0.326368	0.238	7.31282	0.404033	0.335
YBR023C	CHS3	5.94383	0.0237244	NA	5.85645	0.0724854	0.018	5.49684	0.235188	0.15	5.28426	0.16362	0.089
YBR024W	SCO2	6.43004	0.05966	NA	6.26461	0.0861853	0.012	5.91562	0.103625	0.027	5.59342	0.150816	0.066
YBR025C	OLA1	9.46279	0.0258375	NA	9.46572	0.0703737	0.036	9.56262	0.118979	0.083	9.64072	0.123959	0.095
YBR029C	CDS1	6.71247	0.00242797	NA	6.71015	0.0684231	0.003	6.75265	0.170953	0.106	6.8929	0.2109	0.157
YBR030W	RKM3	4.39591	0.0453614	NA	4.27062	0.208904	0.067	4.33322	0.372459	0.234	4.28887	0.384316	0.261
YBR036C	CSG2	5.92577	-0.0111659	NA	5.91053	-0.0230427	NA	5.64094	0.0309681	NA	5.38383	0.0972062	0.03
YBR040W	NA	NA	NA	NA	NA	NA	NA	1.30278	0.190732	0.016	2.42657	0.191456	0.059
YBR042C	CST26	6.42376	-0.00313292	NA	6.5939	0.00626322	NA	6.76095	0.052415	0.032	6.98746	0.090181	0.067
YBR044C	NA	NA	NA	NA	NA	NA	NA	5.14253	0.0505933	0.026	5.28663	0.100907	0.066
YBR046C	ZTA1	5.38061	-0.0132612	NA	5.23514	0.00743525	NA	4.96643	0.0227646	NA	4.30222	0.0169491	NA
YBR052C	RFS1	7.92088	0.00674273	NA	7.86619	0.0151608	0.003	7.81466	0.0431212	0.028	7.32074	0.11517	0.086
YBR053C		6.77014	0.00336562	NA	6.69978	0.00959807	NA	6.52691	0.0467234	0.018	6.06122	0.151946	0.099
YBR054W	YRO2	6.74429	0.0178333	NA	6.65701	0.00891586	NA	6.51014	0.00131308	NA	6.64201	0.0323556	0.009
YBR057C	MUM2	5.21967	0.0489213	NA	4.89403	0.147772	0.062	4.60886	0.422932	0.292	4.41561	0.533295	0.406
YBR061C	TRM7	5.43889	-0.0028935	NA	5.3995	0.0616245	NA	5.08914	0.0988831	0.014	5.40684	0.0941329	0.023
YBR063C		5.71591	0.00628965	NA	5.42053	-0.0090397	NA	4.88359	0.00076971	NA	4.81246	0.0507266	NA
YBR067C	TIP1	9.86167	0.000157671	NA	9.87623	0.000939298	NA	9.83422	0.00293728	0.001	9.69259	0.0086773	0.005
YBR070C	ALG14	5.8898	-0.0162745	NA	5.79596	-0.0141111	NA	5.56106	-0.00646254	NA	5.05878	0.0294146	NA
YBR074W	PFF1	5.57541	0.029853	NA	5.61821	0.0383067	NA	5.54585	0.204583	0.11	5.4284	0.338276	0.247
YBR076C-A		5.23306	0.0473012	NA	5.02185	0.0572905	NA	4.77435	0.0593693	NA	4.61942	0.0352529	NA
YBR078W	ECM33	9.40348	0.0187122	NA	9.4107	0.0406391	NA	9.35488	0.0573341	0.016	8.90839	0.0123819	NA
YBR079C	RPG1	8.79336	0.0049591	NA	8.71786	0.0302509	0.01	8.58619	0.140958	0.106	8.60082	0.276508	0.235
YBR080C	SEC18	5.37789	0.0121043	NA	5.23893	0.0117159	NA	5.05132	0.0808506	0.031	4.71036	0.121214	0.051
YBR081C	SPT7	4.67343	0.0853013	NA	4.69142	0.118202	0.013	4.80226	0.24317	0.128	5.00144	0.374135	0.27
YBR084C-A	RPL19A	9.07116	0.000210728	NA	9.09057	0.00315121	0.001	9.19336	0.0124022	0.008	9.25531	0.0195416	0.015
YBR084W	MIS1	8.14064	0.0039996	NA	8.14526	0.0686378	0.004	8.14514	0.184301	0.113	8.04723	0.380498	0.319
YBR085C-A		8.14691	0.00731046	NA	8.10041	0.0107521	NA	8.05144	0.00370562	NA	8.32374	0.0151614	0.006
YBR085W	AAC3	2.78716	0.0855024	NA	2.76911	0.286925	0.067	2.48058	0.42046	0.196	2.25848	0.541025	0.325
YBR088C	POL30	7.24742	-0.0014454	NA	7.26909	0.000417297	NA	7.23196	0.03324	0.021	7.34526	0.0499375	0.036
YBR089C-A/YBR090C	NHP6B	7.29204	0.00598043	NA	7.29481	0.0301693	0.015	7.28558	0.130574	0.099	7.00523	0.318729	0.266
YBR092C	PHO3	7.82332	0.0704259	NA	7.92337	0.138012	0.054	7.90192	0.254361	0.171	7.91986	0.367754	0.302
YBR097W	VPS15	5.23101	0.105934	NA	5.04433	0.168433	0.052	4.49682	0.22933	0.103	4.3481	0.199718	0.079
YBR098W	MMS4	3.37694	0.0881515	NA	3.18701	-0.0657287	NA	3.02972	0.135888	NA	3.00347	-0.0536012	NA
YBR101C	FES1	6.30247	0.0050297	NA	6.03555	-0.00573154	NA	5.5767	-0.00961731	NA	5.65255	0.0168093	NA
YBR102C	EXO84	5.40873	-0.0118556	NA	5.17248	0.0298475	NA	4.64216	0.0137353	NA	4.35826	0.0602201	NA
YBR103W	SIF2	5.79575	0.00246676	NA	5.61521	0.0365369	0.004	5.32061	0.257191	0.179	5.33441	0.300028	0.224
YBR104W	YMC2	7.47808	0.00140865	NA	7.3239	0.0164614	0.003	6.89429	0.0121682	NA	6.61459	0.03173	0.01
YBR105C	VID24	5.23809	0.0502184	NA	5.03495	0.111731	0.032	4.79375	0.138998	0.058	4.6934	0.196766	0.108
YBR106W	PHO88	10.0331	0.0114136	NA	10.0161	0.024128	0.011	10.0149	0.0297962	0.017	9.59015	0.0531539	0.039
YBR108W	AIM3	5.0967	-0.00168823	NA	5.03649	0.0131989	NA	4.92943	0.0665121	0.027	5.16669	0.106998	0.063
YBR109C	CMD1	9.41059	-0.0011225	NA	9.38046	0.00562895	0	9.38142	0.0127324	0.007	9.30066	0.0334866	0.025
YBR111C	YSA1	7.94672	0.000905553	NA	7.84221	0.000706605	NA	7.71846	0.0122619	NA	7.36978	0.0124673	NA
YBR111W-A	SUS1	5.52491	0.000541426	NA	5.58399	0.0443358	0.014	5.62787	0.144738	0.098	5.66651	0.296546	0.237
YBR112C	CYC8	4.23461	0.00784159	NA	4.20965	0.174584	0.036	4.11109	0.426094	0.277	4.20545	0.577153	0.451
YBR114W	RAD16	3.29308	0.0449291	NA	3.08944	0.00316673	NA	2.86201	0.143457	NA	2.7861	0.242198	0.069
YBR115C	LYS2	9.24269	0.0120946	NA	9.20953	0.0782068	0.018	9.11357	0.132912	0.075	9.07671	0.160884	0.114
YBR118W	TEF2	12.6136	0.000245343	NA	12.6818	0.00178168	0.001	12.8722	0.0130491	0.01	12.887	0.0431471	0.037
YBR119W	MUD1	4.61384	0.00791665	NA	4.47896	0.00438672	NA	4.96328	0.0939123	0.055	5.91321	0.135738	0.103
YBR121C/YBR121C-A	GRS1	8.65565	0.0160777	NA	8.72458	0.0523185	NA	8.89192	0.167049	0.101	9.04529	0.296742	0.237
YBR125C	PTC4	5.20882	-0.0106757	NA	5.0797	0.228562	0.096	4.83111	0.389807	0.259	4.84544	0.491673	0.376
YBR126C	NA	NA	NA	NA	NA	NA	NA	7.30824	0.018544	0.01	7.47939	0.114331	0.092
YBR131W	CCZ1	4.8326	0.0573709	NA	4.30915	0.106841	0.009	3.91501	0.102667	NA	3.96177	0.175977	0.061
YBR132C	AGP2	6.70995	0.000554293	NA	6.69154	0.000974904	NA	6.50462	0.0280092	0.012	6.73048	0.0521016	0.033
YBR133C	HSL7	6.65255	0.0711613	NA	6.59546	0.193743	0.097	6.31738	0.343624	0.252	6.07787	0.36319	0.278
YBR135W	CKS1	6.49118	0.021059	NA	6.48347	0.0246518	NA	6.25452	-0.00741184	NA	6.20812	0.0478226	NA
YBR137W		6.50046	0.023068	NA	6.50522	0.0580004	NA	6.26712	0.0889354	0.021	5.80649	0.177885	0.099
YBR139W		6.19315	0.0114488	NA	6.13573	-0.00321452	NA	5.82895	0.0498233	0.01	5.27845	0.106971	0.045
YBR143C	SUP45	9.41649	0.0363464	NA	9.49826	0.0714122	0.019	9.62144	0.136159	0.086	9.66751	0.186454	0.148
YBR145W	ADH5	8.18007	0.0059526	NA	8.15648	0.0914559	0.058	8.01428	0.420083	0.343	7.7871	0.644832	0.579
YBR149W	ARA1	7.56103	0.054719	NA	7.48857	0.115711	0.036	7.36581	0.198087	0.119	7.01795	0.259049	0.189
YBR151W	APD1	6.36066	-0.0036596	NA	6.31826	0.0459406	0.01	6.2754	0.125127	0.078	6.07699	0.255968	0.194
YBR153W	RIB7	4.88416	0.0775937	NA	4.6104	0.182295	0.05	4.35145	0.366109	0.228	4.51118	0.402598	0.276
YBR155W	CNS1	6.7987	0.00531873	NA	6.58033	0.0197147	NA	6.27082	0.0182594	NA	6.17992	-0.0217452	NA
YBR159W	IFA38	6.60438	-0.00336422	NA	6.76535	0.0405056	NA	6.99576	0.188742	0.117	7.09748	0.338049	0.272
YBR161W	CSH1	5.31527	-0.0146223	NA	5.12064	0.15748	0.061	4.97005	0.327889	0.215	5.05567	0.428148	0.325
YBR162C	TOS1	8.72345	0.00579529	NA	8.74791	0.0109599	NA	8.78702	-0.0308544	NA	8.67366	-0.0366095	NA
YBR163W	EXO5	6.91167	0.0114979	NA	6.84121	0.0408651	NA	6.37541	0.167153	0.096	6.1916	0.194323	0.124
YBR164C	ARL1	7.30995	0.0463925	0.004	7.17532	0.0614754	0.019	6.87537	0.0597019	0.019	6.35032	0.107714	0.051
YBR166C	TYR1	5.62087	0.00313807	NA	5.67268	0.0859964	0.021	5.68642	0.0496895	NA	5.68915	0.0794088	0.026
YBR168W	PEX32	5.00806	0.0865096	NA	5.03679	0.186844	0.071	5.01209	0.262195	0.157	4.97282	0.272568	0.183
YBR170C	NPL4	5.57927	0.06648	NA	5.17678	0.0900627	NA	4.68553	0.174492	0.06	4.40215	0.145525	0.019
YBR176W	ECM31	5.42879	-0.0284478	NA	5.34973	0.0387643	NA	5.0351	0.0371118	NA	5.13144	0.0439672	NA
YBR177C	EHT1	7.43724	0.00923262	NA	7.41683	0.0209119	NA	7.33828	0.00732873	NA	7.22998	0.0144909	NA
YBR181C	RPS6B	9.20492	-1.89223e-05	NA	9.23831	0.000656708	NA	9.265	0.00753768	0.004	9.22175	0.0216882	0.016
YBR185C	MBA1	5.67166	-0.0197731	NA	5.54888	0.20333	0.087	5.26327	0.24537	0.138	5.34828	0.20811	0.121
YBR187W	GDT1	7.33328	0.00139912	NA	7.34841	0.0103327	NA	7.14322	0.0713994	0.045	6.69189	0.218627	0.169
YBR188C	NTC20	4.89162	0.0160989	NA	4.63645	-0.0138891	NA	4.24462	-0.0247019	NA	3.75113	0.0762561	NA
YBR189W	RPS9B	12.2157	-0.000128422	NA	12.2319	0.00260259	0.001	12.4108	0.0082842	0.006	12.3124	0.0190634	0.016
YBR192W	RIM2	4.93158	0.0514433	NA	4.69408	0.0414732	NA	4.4172	0.0587563	NA	4.23332	0.102957	0.026
YBR198C	TAF5	6.06523	-0.0070677	NA	5.84795	0.0140698	NA	5.4889	0.102789	0.052	5.28888	0.145406	0.079
YBR199W	KTR4	7.65344	0.00658701	NA	7.59512	0.0401122	0.013	7.45053	0.184296	0.134	7.22679	0.365066	0.303
YBR201W	DER1	5.33463	0.0139296	NA	5.1069	0.0313038	NA	4.61297	0.0468144	NA	4.36228	0.122663	0.038
YBR207W	FTH1	6.04962	-0.00301913	NA	6.05693	0.00489034	NA	6.06418	0.0987909	0.065	6.03319	0.155414	0.115
YBR212W	NGR1	5.88942	0.0133247	NA	5.93179	0.00829115	NA	5.90601	0.00159585	NA	6.29714	-0.0201557	NA
YBR213W	MET8	2.71089	0.184788	NA	2.68769	0.250284	0.064	1.98517	0.241777	0.068	2.34832	0.241474	0.079
YBR215W	HPC2	5.27117	0.0606311	NA	4.9223	0.07115	NA	4.38066	0.119555	0.012	4.09627	0.163351	0.04
YBR218C	PYC2	9.03426	0.0151995	NA	8.97485	0.0147306	NA	8.9127	0.000466523	NA	8.84698	0.02189	0.007
YBR219C/YBR220C		6.50725	0.0206505	NA	6.37437	0.00607734	NA	5.92249	0.0520572	NA	5.53143	0.0723426	NA
YBR221C	PDB1	9.23264	0.00516632	NA	9.24809	0.0105274	NA	9.34294	0.0094235	NA	9.52555	0.0175194	NA
YBR229C	ROT2	7.35167	0.00616075	NA	7.20122	0.0014588	NA	6.85867	0.0244375	0.008	6.28571	0.0180828	NA
YBR230C	OM14	7.87116	0.0409644	NA	7.85659	0.115708	0.036	7.78971	0.271324	0.191	7.8518	0.343716	0.28
YBR231C	SWC5	5.03565	0.00526844	NA	4.8848	0.00532069	NA	4.52769	0.0467886	NA	4.28021	0.029945	NA
YBR233W-A	DAD3	5.3729	0.0275528	NA	5.39919	0.0267601	NA	5.25736	0.0723402	0.019	4.88645	0.130376	0.059
YBR237W	PRP5	4.54221	-0.0122115	NA	4.30344	0.0309495	NA	4.17206	0.0282124	NA	4.43702	0.00858482	NA
YBR241C		4.95116	0.0264195	NA	4.83572	0.0039872	NA	4.69991	-0.0264852	NA	4.32423	0.0226465	NA
YBR242W		4.55451	0.0325243	NA	4.4159	0.110491	0.017	4.17839	0.224246	0.11	3.7928	0.477468	0.32
YBR243C	ALG7	6.5202	-0.0019554	NA	6.43152	0.0494686	NA	6.15457	0.103886	0.03	5.45025	0.201255	0.108
YBR244W	GPX2	9.44373	0.000316315	NA	9.46445	0.00265819	0	9.20566	0.0251207	0.018	8.90977	0.0544157	0.043
YBR247C	ENP1	6.16166	0.0196307	NA	6.08617	0.0747689	0.026	6.20585	0.164429	0.107	6.4683	0.22564	0.174
YBR248C	HIS7	9.12717	0.00479174	NA	9.0562	0.0456017	0.025	9.05083	0.125233	0.093	9.14565	0.20454	0.168
YBR249C	ARO4	10.2271	0.0487412	NA	10.2299	0.0803526	0.025	10.3088	0.116223	0.062	10.3035	0.2204	0.175
YBR255W	MTC4	4.19223	0.0551537	NA	3.93252	0.109445	NA	3.75688	-0.0506746	NA	3.54479	0.229544	0.089
YBR256C	RIB5	8.61943	0.00173648	NA	8.54071	0.00327625	NA	8.37887	0.0175229	0.01	8.01056	0.0422396	0.029
YBR257W	POP4	4.49873	0.024161	NA	4.29535	0.0529531	NA	3.63399	0.0080498	NA	3.59823	0.0767366	NA
YBR258C	SHG1	4.0034	0.0755767	NA	3.91151	0.21535	0.059	3.40384	0.395543	0.235	3.50858	0.466414	0.337
YBR259W		4.91367	-0.0410127	NA	4.65984	-0.0266877	NA	4.22144	-0.0511728	NA	4.01767	-0.073124	NA
YBR263W	SHM1	7.64236	0.00180318	NA	7.65369	0.0107742	0.001	7.83734	0.00672685	NA	7.89074	0.0112493	0.003
YBR271W	EFM2	5.31401	0.0855407	NA	5.22792	0.0981009	0.006	5.00144	0.159884	0.063	4.81496	0.155774	0.06
YBR272C	NA	NA	NA	NA	5.04781	0.00417458	NA	4.93072	0.0689578	0.034	4.95771	0.110084	0.064
YBR273C	UBX7	6.9546	-0.00428374	NA	6.92637	0.00676456	NA	6.80728	0.0318142	0.016	7.08224	0.0614554	0.043
YBR275C	RIF1	6.19872	0.0095556	NA	6.10267	0.0733864	0.022	5.94219	0.0998356	0.051	5.85023	0.0950378	0.051
YBR276C	PPS1	6.65339	-0.00500072	NA	6.72076	0.0189347	0.006	6.89567	0.0850785	0.062	7.04445	0.266533	0.224
YBR278W	DPB3	6.65399	0.0246461	NA	6.64506	0.129149	0.049	6.3862	0.260392	0.181	6.36556	0.295382	0.23
YBR283C	SSH1	8.41625	0.00752086	NA	8.44992	0.0227428	NA	8.57868	-0.0141998	NA	8.6133	-0.0115466	NA
YBR286W	APE3	9.31459	0.00182904	NA	9.31535	0.00558187	0.001	9.40141	0.010517	0.005	9.30492	0.0194094	0.013
YBR287W		4.69714	0.0116412	NA	4.68323	0.109907	0.04	4.63899	0.389024	0.282	4.69169	0.524886	0.429
YBR289W	SNF5	5.87695	-0.00182718	NA	5.80159	0.0282143	0.008	5.9275	0.141832	0.101	5.96575	0.295605	0.239
YBR291C	CTP1	7.71029	0.0244888	NA	7.6165	0.0640142	NA	7.19745	0.0911964	0.027	6.86458	0.168628	0.102
YBR293W	VBA2	4.89147	0.0177564	NA	4.7918	0.218042	0.106	4.78943	0.360097	0.252	4.92405	0.580803	0.486
YBR301W	NA	NA	NA	NA	NA	NA	NA	1.74697	0.0362772	NA	2.22145	0.269416	0.083
YCL002C		6.24302	0.00801293	NA	6.17694	0.0175971	NA	5.83193	0.0367585	NA	5.47416	0.0986737	0.018
YCL005W	LDB16	5.87945	0.0607618	NA	5.83894	0.0767684	0.009	5.67483	0.145145	0.068	5.42787	0.116615	0.044
YCL011C	GBP2	8.32866	0.0319922	NA	8.29433	0.080656	0.034	8.25548	0.167574	0.126	8.08123	0.223751	0.187
YCL014W	BUD3	5.86038	-0.00972209	NA	5.80196	0.038159	0.012	5.75126	0.139045	0.092	5.71897	0.27732	0.216
YCL017C	NFS1	6.6759	0.0374432	NA	6.54725	0.0144409	NA	6.36183	0.0148265	NA	6.07999	0.0160639	NA
YCL019W/YCL020W		5.3388	0.0269011	NA	5.37832	0.0714844	NA	5.40959	0.0152895	NA	5.50593	0.0422865	NA
YCL021W-A		6.79795	0.00237607	NA	6.87126	0.00769623	NA	7.04021	-0.00208194	NA	7.17998	0.00917209	NA
YCL026C-A	NA	NA	NA	NA	NA	NA	NA	1.68691	0.0331163	NA	2.34694	0.139266	0.047
YCL029C	BIK1	4.96649	0.0549496	NA	4.56722	0.0325179	NA	4.29901	0.0781426	NA	4.00219	0.063888	NA
YCL030C	HIS4	10.2615	0.0099074	NA	10.2726	0.0232831	NA	10.1855	0.0400281	0.013	9.96043	0.067531	0.042
YCL032W	STE50	6.49698	0.0247093	NA	6.43652	0.159911	0.068	6.35582	0.174917	0.095	6.501	0.142408	0.077
YCL047C	POF1	5.6158	0.0240639	NA	5.49728	0.0283417	NA	5.15762	-0.000244358	NA	5.09414	0.0364754	NA
YCL049C		4.50354	-0.0142925	NA	4.35583	0.0284031	NA	4.16016	0.0631035	NA	3.77444	0.22298	0.11
YCL050C	APA1	6.56001	-0.00631814	NA	6.65483	0.0275906	0.009	6.79936	0.0927185	0.065	7.10953	0.169575	0.136
YCL051W	LRE1	5.0607	-0.000513757	NA	4.97237	0.170765	0.08	4.98766	0.37765	0.277	5.18063	0.479617	0.394
YCL055W	KAR4	4.92495	0.0274339	NA	4.9869	0.200295	0.075	4.86714	0.307049	0.184	4.99318	0.363072	0.259
YCR002C	CDC10	6.3004	0.0193957	NA	6.27846	-0.00785691	NA	5.8513	0.0286186	NA	5.51085	0.094034	NA
YCR003W	MRPL32	6.32891	0.00478853	NA	6.15814	0.0431708	0.016	5.68283	0.162156	0.105	5.46779	0.195029	0.128
YCR004C	YCP4	7.3355	0.0269031	NA	7.37252	0.0273536	NA	7.32358	0.0573007	NA	7.2622	0.143248	0.085
YCR005C	CIT2	9.54899	0.00558427	0.001	9.40819	0.0363274	0.026	9.22608	0.0877851	0.069	9.40123	0.14303	0.12
YCR007C		2.82045	0.057131	NA	2.7507	0.0747474	NA	2.42426	0.0324458	NA	1.68941	0.119019	NA
YCR009C	RVS161	7.03157	0.00886893	NA	6.96567	0.0804621	0.008	6.67224	0.1078	0.036	6.37182	0.23314	0.157
YCR011C	ADP1	8.18459	0.0055978	NA	8.18841	0.0231424	0.007	8.03654	0.0657359	0.044	7.80633	0.0943849	0.069
YCR016W		5.59346	0.00241176	NA	5.44512	0.0336019	0.011	5.29783	0.203977	0.136	5.36635	0.302285	0.232
YCR017C	CWH43	8.4436	0.010748	NA	8.41391	0.00713808	NA	8.30489	0.0138858	NA	8.13324	0.0366279	0.017
YCR018C	SRD1	4.74529	0.0613824	NA	4.3533	0.156994	0.026	3.87811	0.215497	0.068	3.75868	0.138112	NA
YCR019W	MAK32	7.21103	0.00212973	NA	7.08473	0.0170697	0.006	6.94277	0.116254	0.085	7.28997	0.298	0.251
YCR023C		6.5174	-0.00138602	NA	6.42058	-0.00516212	NA	6.20566	0.0210843	NA	6.17912	0.0493561	0.021
YCR024C-B		10.1224	0.0092864	NA	10.1956	0.0446325	NA	10.2911	0.0525451	NA	10.1329	0.0989523	0.059
YCR027C	RHB1	4.26911	-0.00627285	NA	3.92959	0.0254831	NA	3.4394	-0.0504601	NA	3.08859	-0.0496796	NA
YCR028C	FEN2	2.67795	0.00899005	NA	2.20304	-0.0610707	NA	1.66433	-0.000632459	NA	1.35736	0.113224	NA
YCR028C-A	RIM1	8.43705	0.00233915	NA	8.47351	0.0232019	NA	8.46554	0.0449947	0.001	8.31629	0.0494574	0.016
YCR030C	SYP1	5.75459	0.000625119	NA	5.73661	0.00175577	NA	5.81159	0.0697458	0.043	5.89018	0.138553	0.102
YCR031C	RPS14A	11.6075	0.0016752	NA	11.653	0.00485877	0.002	11.8134	0.00688118	0.004	11.6859	0.0150626	0.012
YCR032W	BPH1	5.27234	-0.00326851	NA	5.17083	-0.0436724	NA	4.8196	-0.0461087	NA	4.36374	-0.00135205	NA
YCR034W	ELO2	7.91286	0.00292758	NA	7.88275	0.0107497	NA	7.69609	0.0193667	NA	7.37223	0.0365005	0.012
YCR036W	RBK1	5.75539	-0.00455328	NA	5.6706	0.002755	NA	5.51005	0.00355861	NA	5.19998	0.0269729	NA
YCR038C/YCR039C	BUD5/MATALPHA2	3.97621	0.0959314	NA	3.79105	0.130935	0.008	3.39019	0.081957	NA	3.41913	0.0562247	NA
YCR044C	NA	NA	NA	NA	5.00251	0.0179036	NA	5.00286	0.082337	0.048	5.07656	0.102425	0.065
YCR046C	IMG1	6.3371	0.0199331	NA	6.23607	0.0635278	0.026	6.19049	0.144265	0.095	6.04243	0.225503	0.17
YCR054C	CTR86	3.99041	0.0728716	NA	3.88548	0.0800533	NA	3.5765	0.129421	NA	3.67992	0.145306	0.008
YCR065W	HCM1	5.7011	0.0132284	NA	5.60192	0.0308555	0.008	5.29565	0.037687	0.018	5.27007	0.0374791	0.019
YCR069W	CPR4	6.96819	0.00829515	NA	6.90998	0.0306819	0.013	6.58117	0.078664	0.051	6.20905	0.114785	0.076
YCR071C	IMG2	5.66093	0.00132656	NA	5.50118	0.0541235	0.021	5.45667	0.256753	0.188	5.52661	0.410054	0.338
YCR073W-A	SOL2	4.54644	0.00417549	NA	4.66593	0.0336008	NA	4.44298	0.117521	0.06	4.36641	0.309969	0.218
YCR084C	TUP1	5.39403	0.0259701	NA	5.41267	0.0549195	NA	5.53116	0.0957331	0.047	5.73382	0.145611	0.101
YCR087C-A		6.29507	0.00068553	NA	6.30196	0.00635675	NA	6.17041	0.0439715	0.02	6.02052	0.0354494	0.01
YCR092C	MSH3	4.6394	0.111153	NA	4.66809	0.330166	0.18	4.5517	0.510538	0.372	4.35315	0.601636	0.476
YCR094W	CDC50	5.8796	-0.0138688	NA	5.81727	0.00897068	NA	5.63221	0.0696575	0.007	5.32733	0.084176	0.024
YCR102C		2.11284	-0.0395748	NA	2.03153	0.00460914	NA	2.18467	0.0917177	NA	2.47247	0.253088	0.06
YDL002C	NHP10	6.10118	0.0154609	NA	5.82273	0.0527755	NA	5.43144	0.0718229	0.011	5.28253	0.129029	0.063
YDL006W	PTC1	5.5002	-0.00587963	NA	5.36883	0.0119767	NA	5.21878	0.0683096	0.031	5.36807	0.0601409	0.027
YDL007W	RPT2	6.66307	0.00686722	NA	6.6611	0.0441503	0.012	6.72344	0.0998532	0.061	6.97571	0.117676	0.083
YDL012C		7.92483	0.0104433	NA	7.87297	0.0038973	NA	7.578	0.0123938	NA	7.18448	0.0789685	0.046
YDL013W	SLX5	4.86056	0.0224462	NA	4.73645	0.0482567	NA	4.18956	0.0412549	NA	4.0719	0.0231138	NA
YDL014W	NOP1	9.03813	0.0220618	NA	9.06887	0.0601485	NA	9.03854	0.130601	0.061	8.97191	0.218481	0.159
YDL018C	ERP3	6.08771	0.0563451	NA	5.96372	0.0839689	0.001	5.43179	0.125124	0.037	4.77259	0.130378	0.021
YDL019C	OSH2	5.41855	0.021473	NA	5.21544	0.113591	0.015	4.9386	0.157081	0.054	4.84047	0.126456	0.033
YDL020C	RPN4	6.15049	0.00139851	NA	6.2601	0.00487506	NA	6.52827	0.0324794	0.019	7.15937	0.0896346	0.072
YDL021W	GPM2	5.05645	-0.0111874	NA	4.99489	0.0204702	NA	4.82573	0.16432	0.091	4.97139	0.222119	0.149
YDL022W	NA	NA	NA	NA	NA	NA	NA	7.47372	0.00370941	0	8.01065	0.0190616	0.013
YDL025C	RTK1	6.16503	0.0478481	NA	6.04644	0.0986854	0.022	6.07109	0.182481	0.106	6.2187	0.20456	0.143
YDL027C		5.18404	-0.000109325	NA	5.16314	0.0547604	0.009	5.09009	0.0482599	NA	5.168	0.0785153	0.04
YDL028C	NA	NA	NA	NA	5.05158	0.0690527	0.028	5.21278	0.201592	0.144	5.48165	0.336329	0.277
YDL029W	ARP2	6.60886	0.0245211	NA	6.65006	0.131863	0.047	6.67811	0.358244	0.267	6.65445	0.55854	0.489
YDL031W	DBP10	6.72441	0.0125013	NA	6.65034	0.0406179	0.013	6.66685	0.165481	0.118	6.81276	0.312628	0.258
YDL036C	PUS9	4.25295	0.134223	NA	4.0521	0.0572358	NA	3.31839	0.074901	NA	3.21057	0.050836	NA
YDL039C	NA	NA	NA	NA	NA	NA	NA	3.2411	0.0801411	0.021	3.75167	0.177957	0.105
YDL042C	SIR2	4.24393	-0.0253115	NA	4.15731	-0.00316677	NA	3.81344	0.00424315	NA	3.9376	-0.0292584	NA
YDL043C	PRP11	4.95071	0.00349076	NA	4.58799	-0.00427174	NA	3.99548	0.0585005	NA	4.17356	0.00529382	NA
YDL051W	LHP1	6.96187	0.0187044	NA	7.01826	0.0763419	0.022	7.02741	0.140223	0.08	6.89021	0.256265	0.194
YDL052C	SLC1	7.29841	0.00893475	NA	7.22295	0.04201	0.02	6.97914	0.13944	0.101	6.68244	0.229038	0.178
YDL053C	PBP4	6.18064	0.00039323	NA	6.112	0.022779	0.007	6.0686	0.0644842	0.041	6.02193	0.127604	0.092
YDL055C	PSA1	9.17163	-0.00715362	NA	9.21913	0.0294068	NA	9.26917	0.0434532	NA	9.16018	0.0843485	0.038
YDL061C	RPS29B	9.24816	0.00678342	NA	9.33068	0.0199481	0.009	9.40233	0.05605	0.04	9.33383	0.110701	0.09
YDL063C	SYO1	6.2279	0.00375497	NA	6.12726	-0.000631428	NA	5.62575	0.0383076	NA	5.41188	0.0303923	NA
YDL064W	UBC9	6.68033	0.0194258	NA	6.7569	0.0792425	0.02	6.90805	0.435543	0.349	6.99144	0.767561	0.705
YDL066W	IDP1	9.46396	0.00178459	NA	9.42548	0.0224357	NA	9.51941	0.0222263	NA	9.49215	0.0140627	NA
YDL070W	BDF2	7.01196	0.033144	NA	6.76879	0.184003	0.09	6.48014	0.333238	0.246	6.73267	0.404448	0.337
YDL072C	YET3	7.16641	0.0079174	NA	7.19676	0.0956825	0.052	7.04795	0.4009	0.32	6.98582	0.702363	0.636
YDL073W		5.51446	-0.0246315	NA	5.52662	0.0803085	0.007	5.38717	0.300325	0.195	5.42947	0.380167	0.287
YDL075W	RPL31A	9.55456	0.0113013	NA	9.61852	0.0167659	0.004	9.71638	0.0261179	0.012	9.72473	0.046301	0.032
YDL076C	RXT3	5.32377	0.0304569	NA	5.21132	0.0193881	NA	5.05746	0.0825514	0.027	5.04596	0.0934587	0.041
YDL077C	VAM6	5.35589	0.0409335	NA	5.22108	0.0304307	NA	5.10146	0.0715393	0.027	5.02703	0.0714455	0.025
YDL081C	RPP1A	11.0488	7.0108e-05	NA	11.119	0.00205196	0.001	11.1638	0.0118808	0.009	11.1089	0.028072	0.024
YDL082W	RPL13A	8.57068	0.0418033	0.012	8.60733	0.0399057	0.013	8.62101	0.0581962	0.03	8.56271	0.108476	0.083
YDL083C	RPS16B	11.686	0.000138487	NA	11.6818	0.00789131	0.005	11.6638	0.0313158	0.025	11.5097	0.0689426	0.059
YDL084W	SUB2	8.36063	-0.0030015	NA	8.44119	0.0499542	0.027	8.57114	0.26221	0.207	8.69164	0.586849	0.524
YDL085C-A		6.01127	0.0417109	NA	6.04133	0.137344	0.045	6.1021	0.173135	0.088	5.87046	0.190099	0.113
YDL086W		7.71755	-0.00576619	NA	7.66088	0.00531393	NA	7.51116	0.0190669	NA	7.07838	0.0265034	0.005
YDL088C	ASM4	5.8456	0.0323421	NA	5.88222	0.0704204	0.026	5.99617	0.0669388	0.027	6.20509	0.0577092	0.022
YDL090C	RAM1	5.19634	-0.00452187	NA	5.00825	0.0129222	NA	4.49297	0.047158	NA	4.0272	0.0571148	NA
YDL095W	PMT1	8.27659	-2.9899e-05	NA	8.21945	0.00241594	NA	8.19202	0.0131128	NA	7.68375	0.0786829	0.053
YDL102W	POL3	6.84922	0.0086986	NA	6.85354	0.0171551	NA	6.49488	0.0746435	0.04	6.20152	0.0894621	0.05
YDL103C	QRI1	5.62128	0.00593119	NA	5.58951	0.0519646	0.009	5.33843	0.188973	0.12	5.22513	0.219149	0.148
YDL106C	PHO2	5.54126	0.0428689	NA	5.43329	0.106485	0.032	5.12942	0.152592	0.081	5.13	0.120093	0.055
YDL111C	RRP42	7.34782	0.0113233	NA	7.2859	0.0326082	0.01	6.91271	0.0806985	0.048	6.67205	0.101038	0.065
YDL112W	TRM3	6.89567	-0.00120492	NA	6.88363	0.00941556	NA	6.67035	3.92097e-05	NA	6.53732	0.00701629	NA
YDL113C	ATG20	5.11521	0.00559556	NA	5.08663	0.0113198	NA	5.04836	0.0539671	0.025	5.23839	0.102226	0.061
YDL116W	NUP84	6.8093	-0.00618393	NA	6.65069	0.0130649	NA	6.1523	0.0160903	NA	5.99491	0.0797706	0.039
YDL117W	CYK3	5.35291	0.000836862	NA	5.26491	0.017451	NA	5.38911	0.105736	0.067	5.56489	0.165148	0.122
YDL119C		4.64607	-0.027429	NA	4.51457	0.020385	NA	4.27547	0.105667	0.037	4.26801	0.145554	0.067
YDL120W	YFH1	6.90067	0.0246392	NA	6.76361	0.0322536	NA	6.51519	0.12485	0.055	6.29003	0.156898	0.092
YDL121C		6.71247	0.017897	NA	6.6818	0.0165149	NA	6.33665	0.0255525	NA	5.73084	0.0239115	NA
YDL126C	CDC48	8.71628	-0.000804693	NA	8.71761	0.016566	0.009	8.76758	0.11604	0.093	8.64043	0.334747	0.29
YDL128W	VCX1	8.18697	0.00707249	NA	8.17969	0.0120027	NA	8.00756	0.00788584	NA	7.89724	0.0166893	0.003
YDL131W	LYS21	10.1946	0.00348899	NA	10.1058	0.0204431	0.013	9.88377	0.0673014	0.053	9.54182	0.13087	0.11
YDL133C-A	RPL41B	10.2809	-0.0007033	NA	10.3634	-0.00111953	NA	10.5181	-0.0017315	NA	10.6292	-0.00224189	0
YDL135C	RDI1	7.41207	0.00180438	NA	7.31104	0.0150254	NA	7.0308	-0.00632326	NA	6.38491	0.030462	NA
YDL136W	RPL35B	8.66094	0.00655607	NA	8.67412	0.0139108	NA	8.63663	0.019413	0.003	8.4596	0.0384784	0.022
YDL140C	RPO21	6.67928	0.00991239	NA	6.57845	0.0262314	0.003	6.4718	0.0628569	0.034	6.46416	0.0928293	0.06
YDL141W	BPL1	4.92554	0.0172899	NA	4.94595	0.0542048	NA	4.68264	0.103738	0.002	4.60247	0.147485	0.057
YDL142C	CRD1	5.29454	0.0663808	NA	5.28402	0.170307	0.076	4.94851	0.240105	0.148	4.8402	0.33176	0.242
YDL143W	CCT4	7.79879	-0.000387077	NA	7.76253	0.0165929	0.004	7.72943	0.160488	0.124	7.76133	0.334999	0.285
YDL145C	COP1	8.20255	0.0170958	0.001	8.18918	0.026577	0.013	8.2423	0.0491168	0.034	8.19258	0.106969	0.087
YDL146W	LDB17	4.63469	0.0453213	NA	4.48015	0.20719	0.068	4.58905	0.466689	0.341	5.07978	0.563763	0.466
YDL147W	RPN5	7.44799	0.00137029	NA	7.35518	0.0536518	0.028	7.17767	0.114485	0.08	7.13191	0.269193	0.221
YDL148C	NOP14	6.72072	0.0431021	NA	6.53246	0.000367743	NA	6.21634	0.0146583	NA	6.12359	-0.0300791	NA
YDL154W	MSH5	2.01132	-0.0912308	NA	1.95945	-0.00147417	NA	1.81864	0.114946	NA	1.68965	-0.133102	NA
YDL155W	CLB3	5.45038	-0.0335212	NA	5.04328	-0.017336	NA	4.55266	0.0935085	NA	4.27607	-0.0726309	NA
YDL159W	STE7	4.46478	0.0233825	NA	4.38808	0.0315515	NA	4.55723	0.0927183	0.048	4.68516	0.1754	0.118
YDL161W	ENT1	5.47636	0.0529415	NA	5.25019	0.143911	0.054	5.20376	0.463351	0.344	5.3531	0.603454	0.509
YDL165W	CDC36	7.06835	-0.000784404	NA	7.02719	0.0225958	NA	6.7024	0.0903871	0.045	6.39982	0.091527	0.045
YDL167C	NRP1	6.96004	0.0265068	NA	6.84821	0.127194	0.078	6.65078	0.388704	0.32	6.60112	0.491526	0.428
YDL168W	SFA1	6.71074	0.0212383	NA	6.70827	0.0947542	0.019	6.74483	0.22933	0.148	6.75768	0.360323	0.294
YDL175C	AIR2	4.62089	0.00567296	NA	4.21481	0.039895	NA	3.79387	0.0885768	0.012	3.91673	0.0533487	NA
YDL176W		6.00059	0.00792035	NA	5.82002	0.0275671	0.001	5.32027	0.0514461	0.017	5.38195	0.0387113	0.007
YDL179W	PCL9	5.5846	0.117086	0.026	5.26573	0.381639	0.234	4.93283	0.47402	0.344	4.94506	0.514057	0.403
YDL180W		5.568	0.0218253	NA	5.49765	0.188926	0.076	5.47278	0.400888	0.294	5.94078	0.482273	0.405
YDL181W	INH1	5.42159	0.0243358	NA	5.52457	0.0474564	0.017	5.71028	0.160645	0.113	5.93429	0.325451	0.269
YDL182W	LYS20	11.5067	-8.85588e-05	NA	11.4739	0.00145996	0	11.4666	0.0105518	0.008	11.3118	0.029868	0.025
YDL183C		6.6044	0.0574852	0.001	6.50919	0.095582	0.043	6.51655	0.122256	0.076	6.75736	0.13029	0.093
YDL184C	RPL41A	10.7867	-0.000215692	NA	10.7878	0.000290564	NA	10.8543	0.00297858	0.001	10.9956	0.00627319	0.004
YDL185W	VMA1	9.63138	0.00388822	NA	9.62196	0.00709436	NA	9.49814	0.0302087	0.02	9.36574	0.0788119	0.064
YDL188C	PPH22	5.9539	0.00818879	NA	6.02465	0.0953943	0.014	6.07699	0.182848	0.099	6.34668	0.377917	0.304
YDL189W	RBS1	6.53274	0.00312542	NA	6.52458	0.0424981	0.018	6.49035	0.138802	0.099	6.68232	0.230499	0.186
YDL190C	UFD2	6.03158	0.00993034	NA	5.97604	0.011267	NA	5.51527	0.0578518	0.024	5.23278	0.0378155	NA
YDL191W	RPL35A	9.32892	-0.00135489	NA	9.34607	0.00756981	NA	9.39828	0.0203953	0.009	9.40147	0.0398243	0.027
YDL192W	ARF1	10.5631	0.0397054	NA	10.5093	0.0731666	0.018	10.4448	0.112481	0.058	10.1223	0.203291	0.157
YDL194W	SNF3	3.85477	0.046431	NA	3.91677	0.00229674	NA	3.51426	0.0972825	NA	3.45716	0.0628145	NA
YDL197C	ASF2	5.435	0.0450372	NA	5.35454	0.150516	0.052	5.48019	0.137471	0.055	5.6934	0.105048	0.041
YDL198C	GGC1	8.07233	0.00476628	NA	7.98695	0.0359012	0.01	7.65773	0.081404	0.048	7.06096	0.143516	0.1
YDL202W	MRPL11	6.40194	-0.0142716	NA	6.27933	0.00407437	NA	5.83493	0.0425916	NA	5.70863	0.0497286	NA
YDL203C	ACK1	4.67231	-0.023515	NA	4.51504	0.0246953	NA	4.20688	0.102817	0.013	4.10233	0.162951	0.06
YDL205C	HEM3	6.45119	0.000831771	NA	6.47487	0.013201	NA	6.25056	0.0122878	NA	6.1052	0.0197801	NA
YDL207W	GLE1	4.57714	6.9968e-05	NA	4.51926	0.0936918	0.029	4.38642	0.186586	0.106	4.47154	0.269031	0.184
YDL208W	NHP2	9.2338	-0.00184334	NA	9.21554	0.00819586	0.003	9.24834	0.0702906	0.055	9.19153	0.155834	0.131
YDL211C		4.49715	0.100831	NA	4.40213	0.102032	NA	4.0833	0.0680618	NA	3.99981	0.101942	NA
YDL215C	GDH2	5.79531	0.0257555	NA	5.78726	0.0438391	NA	5.8681	0.0723283	0.032	6.2302	0.0422376	0.001
YDL217C	TIM22	4.88026	-0.0833748	NA	4.54736	0.0145457	NA	3.79128	0.159309	0.029	3.73607	0.134644	NA
YDL219W	DTD1	7.25763	0.00365171	NA	7.22112	0.0307694	NA	7.14891	0.131628	0.06	6.83636	0.269742	0.202
YDL224C	WHI4	6.88378	0.0442208	NA	6.89844	0.102678	0.052	6.70956	0.121403	0.077	6.56112	0.116564	0.078
YDL225W	SHS1	6.72063	0.0112232	NA	6.59515	0.0640439	0.021	6.40661	0.240083	0.172	6.47194	0.31433	0.253
YDL226C	GCS1	7.3636	0.0282668	NA	7.31741	0.0115211	NA	7.00773	0.0209167	NA	6.57222	0.0567246	0.013
YDL229W	SSB1	10.9498	-0.000218879	NA	11.0376	-0.000158325	NA	11.1273	0.00205519	0.001	11.1541	0.0119015	0.009
YDL230W	PTP1	4.5321	0.0241132	NA	4.40031	0.0684872	NA	4.14221	0.308109	0.186	4.12955	0.536589	0.41
YDL231C	BRE4	4.25409	-0.0226946	NA	4.29042	0.000969813	NA	4.0009	0.0787512	NA	4.06189	0.207555	0.102
YDL234C	GYP7	4.75599	0.00549364	NA	4.53431	0.0416253	NA	4.07148	0.201865	0.069	3.91963	0.247416	0.107
YDL236W	NA	NA	NA	NA	7.25114	0.00363128	NA	7.40939	0.0327748	0.023	7.64256	0.0804813	0.065
YDL237W	AIM6	8.06717	0.00643468	NA	8.06066	0.0567192	0.012	8.07046	0.151174	0.101	7.82653	0.408411	0.351
YDL239C	ADY3	2.86545	0.0428969	NA	2.71492	0.201877	0.053	2.48906	0.465487	0.276	2.62178	0.593839	0.421
YDL240W	LRG1	4.9616	-0.0011947	NA	4.77878	0.0395524	NA	4.27572	-0.0938929	NA	4.1563	-0.134092	-0.012
YDL243C	AAD4	3.28258	-0.0498397	NA	3.30733	0.226088	0.048	3.43557	0.510018	0.321	3.70511	0.605434	0.45
YDR001C	NTH1	6.31705	-0.00622308	NA	6.30674	0.00922775	NA	6.12082	0.00772079	NA	6.01347	0.108967	0.07
YDR002W	YRB1	10.2207	0.000178982	NA	10.2073	0.00114998	0	10.223	0.00916718	0.006	10.2727	0.0272281	0.022
YDR004W	RAD57	5.2062	0.0187858	NA	5.11804	0.0188455	NA	4.92816	0.0280476	NA	5.06161	0.0571929	0.014
YDR007W	TRP1	5.85563	0.0124878	NA	5.81023	0.0333454	NA	5.51264	0.0362659	NA	4.91984	0.0962879	0.031
YDR011W	SNQ2	8.11988	0.00506863	NA	8.11837	0.00699449	NA	7.89363	0.00539368	NA	8.03105	0.0104353	0.004
YDR016C	DAD1	6.23955	-0.00901884	NA	6.08545	-0.0101482	NA	5.73319	0.0220972	NA	5.64182	0.0572967	NA
YDR019C	GCV1	8.58486	0.0105834	NA	8.48263	0.0153605	NA	8.04094	-0.0312122	NA	7.79067	-0.0174343	NA
YDR025W	RPS11A	9.86661	0.000761648	NA	9.95705	0.00951103	0.003	10.0754	0.0385469	0.028	10.0523	0.0658969	0.054
YDR026C	NSI1	5.65171	-0.00877841	NA	5.36053	0.0772831	NA	5.18937	0.226751	0.12	5.30514	0.333841	0.238
YDR028C	REG1	8.26795	0.00113031	NA	8.12834	0.00343809	NA	7.83115	0.00753711	0.001	7.55149	0.007713	NA
YDR030C	RAD28	3.5243	0.0706468	NA	3.16924	0.174914	NA	2.46996	0.118791	NA	2.432	0.207725	NA
YDR031W	MIX14	4.29988	0.0164282	NA	4.17377	0.0123038	NA	3.5386	-0.0501885	NA	3.24799	-0.120776	-0.006
YDR032C	PST2	8.71167	-0.00373493	NA	8.76737	0.00569675	NA	8.81904	0.0172418	0	8.88265	0.0232423	0.009
YDR033W	MRH1	7.30093	-0.0229066	NA	7.32702	-0.00682802	NA	7.48617	0.0271854	NA	7.32634	0.0423426	0.017
YDR034C	LYS14	7.06765	-0.0251104	NA	6.85125	0.0123131	NA	6.47315	-0.00491798	NA	6.32566	-0.0153144	NA
YDR034C-C/YDR034C-D		5.31999	0.0658163	NA	5.30168	0.0941853	NA	5.37478	0.0506085	NA	5.44779	0.0867724	0.008
YDR034W-B		1.81443	0.0293554	NA	1.90099	-0.156958	NA	1.49567	-0.0717424	NA	1.17045	-0.107495	NA
YDR035W	ARO3	7.31113	0.0166789	NA	7.3192	0.0802913	0.013	7.21783	0.0353275	NA	7.05562	0.15261	0.093
YDR039C	ENA2	5.47403	0.0569325	NA	5.47346	0.067255	NA	5.27586	0.0627112	NA	5.16241	0.100458	0.015
YDR045C	RPC11	7.60108	0.0224275	NA	7.61821	0.15382	0.088	7.64685	0.423317	0.341	7.73447	0.487108	0.421
YDR046C	BAP3	8.20847	0.0302293	0.001	8.19296	0.120168	0.073	8.16784	0.311727	0.245	8.16567	0.343581	0.288
YDR047W	HEM12	6.50872	-2.55871e-05	NA	6.51034	0.0471244	0.02	6.45491	0.21785	0.163	6.55321	0.339842	0.282
YDR050C	TPI1	11.7658	0.000143291	NA	11.8663	0.000454364	0	11.9569	0.00218039	0.001	11.9532	0.00645867	0.005
YDR055W	PST1	6.85637	0.0076861	NA	6.76386	0.0284087	0.014	6.33902	0.106226	0.072	6.30996	0.114247	0.079
YDR066C	RTR2	4.37716	-0.0242468	NA	4.07815	-0.0233912	NA	3.5592	0.0165366	NA	3.13027	-0.0608207	NA
YDR068W	DOS2	6.68363	0.0357787	NA	6.51541	0.0746406	0.022	6.35829	0.217014	0.145	6.2421	0.342356	0.265
YDR069C	DOA4	5.08835	0.0420854	NA	5.11463	0.0487647	NA	5.0505	0.0597356	0.015	5.08648	0.100162	0.063
YDR075W	PPH3	4.82431	-0.00305222	NA	4.73311	0.0912886	0.033	4.59516	0.287276	0.194	4.55887	0.332265	0.242
YDR077W	SED1	10.4748	-0.000729351	NA	10.5405	0.00129031	NA	10.5951	0.00287483	0.001	10.7657	0.0036414	0.002
YDR079C-A	TFB5	6.78098	0.00902419	NA	6.70809	0.0175108	NA	6.50139	0.0241759	0.005	6.02123	0.017512	NA
YDR079W	PET100	7.56093	0.0399183	NA	7.32449	0.0832732	0.018	6.93164	0.194824	0.123	6.88532	0.22488	0.164
YDR080W	VPS41	5.49397	0.00841009	NA	5.171	0.00343109	NA	4.4842	-0.0410265	NA	4.27815	-0.0918682	NA
YDR081C	PDC2	5.75409	0.020121	NA	5.69467	0.107829	0.035	5.30074	0.166601	0.085	5.12637	0.135481	0.059
YDR084C	TVP23	5.88897	0.041514	NA	5.87946	0.0244848	NA	5.65503	0.0805366	NA	5.30454	0.0977518	0.021
YDR086C	SSS1	9.36716	0.0268099	NA	9.33155	0.0366997	0.008	9.4006	0.0289073	NA	9.29671	0.0191286	NA
YDR089W		6.71646	-0.00471426	NA	6.60101	0.127908	0.054	6.13508	0.243135	0.157	6.05438	0.290615	0.21
YDR091C	RLI1	7.11888	0.0190641	NA	7.14304	0.01615	NA	7.26181	0.0185574	0.004	7.45279	0.024585	0.012
YDR092W	UBC13	5.64119	-0.00220216	NA	5.68961	0.0157342	NA	5.58943	0.150416	0.1	5.35394	0.380405	0.299
YDR093W/YDR094W	DNF2	7.38442	2.80956e-05	NA	7.30218	0.0227579	0.004	7.11739	0.0969557	0.066	6.61042	0.191455	0.144
YDR096W	GIS1	4.19791	-0.013759	NA	4.23008	0.141547	0.012	4.0593	0.416869	0.262	4.36043	0.4761	0.347
YDR097C	MSH6	5.96071	0.00919716	NA	5.9451	0.0464504	0.02	5.76228	0.184685	0.131	5.68854	0.375436	0.305
YDR098C	GRX3	7.3462	0.0147953	NA	7.32681	0.0570567	0.019	7.11369	0.141793	0.092	6.85137	0.298836	0.238
YDR098C-A/YDR098C-B		8.15803	0.0528346	NA	8.13714	0.0221966	NA	8.26425	0.0151231	NA	8.39784	0.0382175	NA
YDR099W	BMH2	8.27296	0.00560364	NA	8.30583	0.0413079	0.012	8.26234	0.10415	0.067	8.13653	0.219465	0.175
YDR100W	TVP15	6.76026	0.0417469	NA	6.70547	0.105675	0.029	6.49058	0.353663	0.264	6.4444	0.570106	0.494
YDR103W	STE5	6.13139	0.021909	NA	6.02561	0.0232314	NA	5.89797	0.0035914	NA	6.0091	0.0516022	NA
YDR104C	SPO71	5.13908	0.0152043	NA	5.00093	0.0912844	NA	4.67525	0.142809	0.036	4.5023	0.152844	0.049
YDR105C	TMS1	7.20364	0.00402727	NA	7.11925	0.0093382	NA	7.03822	0.0503925	0.032	6.94764	0.0691686	0.048
YDR107C	TMN2	5.06893	0.00287442	NA	5.00044	0.0855224	NA	4.88278	0.276404	0.164	4.64492	0.415091	0.3
YDR111C	ALT2	4.22957	0.0145217	NA	3.96929	0.0260418	NA	3.50607	-0.0416282	NA	3.46771	-0.0766628	NA
YDR115W		6.80948	0.0734163	NA	6.72867	0.162927	0.07	6.36914	0.336661	0.245	6.08721	0.351292	0.272
YDR116C	MRPL1	5.23614	0.00383479	NA	5.24606	0.106295	0.055	5.32511	0.316577	0.241	5.62793	0.435947	0.366
YDR117C	TMA64	5.07773	0.0104671	NA	5.04616	0.0936197	0.005	4.57628	0.133953	0.036	4.23666	0.21583	0.089
YDR118W/YDR118W-A	APC4	4.51887	0.123654	NA	4.42717	0.229042	0.085	3.99338	0.338264	0.2	3.91885	0.301213	0.177
YDR120C	TRM1	7.23969	0.018781	NA	7.33398	0.0667411	0.039	7.44432	0.25712	0.201	7.53974	0.379879	0.324
YDR127W	ARO1	8.61654	0.0965349	0.021	8.61077	0.136542	0.055	8.5149	0.144446	0.074	8.13308	0.282765	0.221
YDR128W	MTC5	6.28527	0.022715	NA	6.128	0.0623812	NA	5.91796	0.0887991	0.014	5.79533	0.119537	0.047
YDR129C	SAC6	8.38693	0.00187968	NA	8.37314	0.00379641	NA	8.25928	0.0174895	0.01	8.02087	0.0470582	0.034
YDR130C	FIN1	4.52399	-0.0251216	NA	4.17084	0.00488128	NA	3.46142	0.0890108	NA	3.24703	0.153329	0.053
YDR132C		4.03852	0.00169462	NA	3.68439	0.0199081	NA	3.12873	0.0616984	NA	3.3339	-0.0148129	NA
YDR133C/YDR134C		11.7581	0.0109174	0.003	11.7583	0.0153249	0.008	11.5599	0.0200769	0.012	12.006	0.0276617	0.021
YDR140W	MTQ2	5.14512	0.016871	NA	5.04469	-0.0213044	NA	4.55927	-0.0221824	NA	4.25784	-0.0406531	NA
YDR141C	DOP1	6.62527	-0.0282558	NA	6.46265	0.0180322	NA	5.9355	0.00217258	NA	5.65901	0.0223928	NA
YDR142C	PEX7	4.86242	0.0358709	NA	4.70434	0.000113681	NA	4.48806	0.0635206	NA	4.48779	0.0344467	NA
YDR144C	MKC7	7.04811	0.00187575	NA	7.00735	0.0484738	0.011	6.8067	0.255747	0.19	6.59156	0.471895	0.401
YDR145W	TAF12	6.12559	0.0317638	NA	6.20576	0.158361	0.066	6.32763	0.311622	0.224	6.79843	0.350096	0.283
YDR146C	SWI5	6.1531	0.0149359	NA	6.07411	0.0308688	NA	6.23937	0.0310302	NA	6.41838	0.0379426	0.007
YDR147W	EKI1	6.0253	0.0385626	NA	5.92206	0.186754	0.111	5.67316	0.464431	0.367	5.57989	0.584839	0.499
YDR148C	KGD2	7.41034	0.0153018	NA	7.42032	0.068645	NA	7.36883	0.161264	0.087	7.32002	0.306314	0.238
YDR151C	CTH1	5.38778	0.103545	NA	5.47144	0.124991	0.028	5.45314	0.253151	0.15	5.58965	0.311354	0.224
YDR152W	GIR2	7.28764	0.00505806	NA	7.25594	0.0190178	0.006	7.27753	0.0538641	0.036	7.1937	0.159695	0.127
YDR153C	ENT5	5.53305	0.0315725	NA	5.34808	0.0848598	0.027	5.43862	0.154015	0.09	5.78396	0.230171	0.167
YDR161W		6.62243	0.0292218	NA	6.53441	0.11526	0.053	6.3037	0.359855	0.272	6.14232	0.552739	0.47
YDR163W	CWC15	5.61377	0.0305661	NA	5.43142	0.0357373	NA	5.45893	0.168615	0.077	5.58375	0.143489	0.069
YDR164C	SEC1	5.14699	0.0139656	NA	4.98303	0.0356712	NA	4.76697	0.0882551	0.034	4.55096	0.197604	0.109
YDR165W	TRM82	6.82061	0.0237903	NA	6.76229	0.0286998	NA	6.55095	0.0342384	0.001	6.40893	0.0205712	NA
YDR168W	CDC37	7.04988	0.0211678	NA	7.04769	0.0661693	0.025	6.95481	0.171067	0.117	6.92424	0.295193	0.236
YDR169C	STB3	5.88595	0.0599036	NA	5.72436	0.0694285	NA	5.36855	0.115248	0.043	5.33184	0.132791	0.064
YDR172W	SUP35	7.95522	0.0062375	NA	7.9349	0.0348114	0.005	8.04211	0.0507532	0.024	8.16848	0.0628057	0.04
YDR174W	HMO1	6.999	0.0166831	NA	7.00397	0.0424198	0.016	6.99088	0.183421	0.142	6.95725	0.423803	0.366
YDR175C	RSM24	6.72703	0.0109263	NA	6.6274	0.151734	0.084	6.45199	0.439418	0.352	6.48424	0.593416	0.521
YDR179C	NA	NA	NA	NA	3.97764	0.0659968	0.013	4.11642	0.171349	0.1	3.97075	0.217235	0.132
YDR181C	SAS4	3.62656	0.078662	NA	3.17926	0.1479	NA	3.03676	0.0965131	NA	2.8893	0.147236	NA
YDR182W-A		1.71284	0.19564	NA	2.37912	0.295318	0.075	2.82711	0.267687	0.102	3.12208	0.290457	0.139
YDR183C-A/YDR184C	ATC1	4.67824	0.00469637	NA	4.61328	0.0747628	0.02	4.57223	0.0913295	0.038	4.72917	0.138315	0.08
YDR183W	PLP1	4.99315	-0.0410656	NA	4.9042	0.160844	0.061	4.86918	0.553016	0.429	4.81121	0.723609	0.628
YDR185C	UPS3	3.77018	0.0761314	NA	3.48153	0.0765076	NA	2.93348	0.190201	0.012	2.87425	0.0689659	NA
YDR188W	CCT6	7.17843	0.00297685	NA	7.17883	0.021251	NA	7.11326	0.0239739	NA	7.04194	0.0397009	0.013
YDR190C	RVB1	7.38104	0.0316793	NA	7.3566	0.0592444	0.012	7.28771	0.11802	0.065	7.33091	0.0812751	0.041
YDR195W	NA	NA	NA	NA	NA	NA	NA	5.94961	0.0174787	0.007	6.0817	0.0256484	0.014
YDR196C	CAB5	6.43487	0.00995114	NA	6.39994	0.0493274	0.015	6.19859	0.0868318	0.047	6.22095	0.173953	0.125
YDR197W	CBS2	4.39456	0.0663547	NA	4.45104	0.335706	0.167	4.11636	0.669941	0.516	4.10498	0.704119	0.578
YDR198C	RKM2	5.33108	0.0456038	NA	5.04097	0.225005	0.092	4.77229	0.374477	0.244	4.7534	0.40372	0.288
YDR201W	SPC19	4.53011	-0.00721846	NA	4.28994	-0.0339009	NA	3.78938	-0.00872006	NA	3.19535	-0.0709869	NA
YDR210C-C/YDR210C-D		8.14996	0.0466883	NA	8.13295	0.0529955	NA	8.26059	0.0203412	NA	8.40358	0.0489438	NA
YDR210W		6.39908	0.0101169	NA	6.36307	0.0123428	NA	6.16161	-0.0703059	NA	5.87994	-0.0777253	NA
YDR211W	GCD6	6.2204	-0.00152282	NA	6.25773	0.00404774	NA	6.20221	0.0492552	0.029	6.29718	0.0913315	0.065
YDR212W	TCP1	7.09347	0.00530697	NA	7.06731	0.00596465	NA	7.02251	-0.0003353	NA	6.87032	0.00273323	NA
YDR213W	UPC2	2.51079	-0.0166574	NA	2.39242	-0.109503	NA	2.14146	-0.0922888	NA	2.26006	-0.0927973	NA
YDR214W	AHA1	8.65061	0.0093514	NA	8.48408	0.00433159	NA	8.10293	-0.0259285	NA	7.71376	-0.0213892	NA
YDR217C	RAD9	6.90197	0.0108569	NA	6.80123	0.0311005	0.014	6.50782	0.123689	0.087	6.52481	0.18417	0.143
YDR221W	GTB1	4.02244	0.035177	NA	3.87943	-0.00441188	NA	3.52786	-0.0421747	NA	2.61146	-0.176738	NA
YDR226W	ADK1	8.92162	0.00598193	NA	8.96104	0.020462	0.008	9.02798	0.0534956	0.037	8.88123	0.123581	0.101
YDR227W	SIR4	4.69973	-0.00316636	NA	4.65349	0.0138936	NA	4.92227	0.138195	0.065	5.55904	0.171769	0.111
YDR228C	PCF11	5.53181	0.0025117	NA	5.54976	0.0744849	0.032	5.63476	0.214799	0.154	5.71809	0.244648	0.19
YDR231C	COX20	5.44046	0.105687	0.005	5.31009	0.154115	0.049	5.06947	0.157047	0.061	4.7153	0.305617	0.175
YDR232W	HEM1	5.59846	-0.00664976	NA	5.68364	0.181206	0.077	5.65702	0.618168	0.511	5.8678	0.778885	0.703
YDR233C	RTN1	9.98181	-0.00122134	NA	10.0038	0.0244393	0.017	9.97553	0.167629	0.134	9.9154	0.371112	0.32
YDR235W	PRP42	5.71989	0.0173558	NA	5.59602	0.0439368	0.008	5.37422	0.103862	0.057	5.41753	0.188372	0.13
YDR237W	MRPL7	5.64579	0.0372044	NA	5.65909	0.142139	0.067	5.4252	0.38647	0.286	5.27199	0.627166	0.533
YDR238C	SEC26	7.99079	0.0525407	NA	7.9736	0.0576822	0.003	7.78772	0.118743	0.062	7.46512	0.201932	0.144
YDR242W	AMD2	3.40637	-0.0657443	NA	3.32457	-0.0060457	NA	2.8587	-0.108743	NA	2.51338	0.0123249	NA
YDR244W	PEX5	4.89332	0.0850092	NA	4.79718	0.170072	0.066	4.549	0.25632	0.155	4.60863	0.350503	0.254
YDR246W	TRS23	5.75779	0.00625906	NA	5.4717	0.0390046	NA	5.2154	0.0431842	NA	5.2544	0.0223148	NA
YDR249C		4.3789	0.0362672	NA	4.24171	0.106107	0.013	3.66634	0.188393	0.063	3.69961	0.199157	0.074
YDR259C	YAP6	2.70057	0.0697993	NA	2.63503	0.200003	0.004	2.57399	0.514489	0.29	2.92402	0.577181	0.394
YDR260C	SWM1	5.47228	0.0165994	NA	5.25397	0.0320718	NA	4.79415	0.0581752	NA	4.58336	0.0248799	NA
YDR261C-C/YDR261C-D		8.1333	0.0428047	NA	8.11973	0.0331223	NA	8.23846	0.00392138	NA	8.37422	0.0332166	NA
YDR263C	DIN7	3.93483	0.0611022	NA	4.07039	0.158546	0.026	3.89696	0.204181	0.072	3.91214	0.209271	0.086
YDR264C	AKR1	6.72057	0.00969672	NA	6.61372	-0.00162748	NA	6.14166	0.0192665	0.002	5.7756	0.00367224	NA
YDR267C	CIA1	4.8226	0.00951035	NA	4.63024	0.104813	0.005	4.01519	0.241744	0.1	3.55163	0.338644	0.158
YDR272W	GLO2	6.81347	0.0257742	NA	6.69462	-0.00281797	NA	6.22023	0.00697228	NA	5.74391	0.0243603	NA
YDR273W	DON1	4.02106	0.0219864	NA	4.23951	0.205315	0.061	4.29744	0.331142	0.187	4.59185	0.321105	0.206
YDR276C	PMP3	9.05963	-0.000143898	NA	9.0053	0.008624	NA	8.90927	-0.0151247	NA	8.43613	0.014482	NA
YDR277C	MTH1	5.68727	0.0779738	0.012	5.39963	0.0771498	0.017	4.88801	0.128422	0.05	4.44241	0.0647827	NA
YDR280W	RRP45	6.4733	0.0138311	NA	6.22258	0.0183217	NA	5.64841	0.0532634	0.018	5.4172	0.0707629	0.028
YDR281C	PHM6	2.47872	0.0940194	NA	2.3635	0.281898	0.053	1.91621	0.202488	NA	2.23628	0.240254	0.051
YDR282C		4.69066	0.12037	0.002	4.53768	0.172811	0.05	4.12419	0.210082	0.078	4.12382	0.236217	0.101
YDR283C	GCN2	6.88946	0.000137203	NA	6.82029	0.0297139	0.015	6.49739	0.144419	0.105	6.18857	0.243377	0.189
YDR284C	DPP1	6.2762	-0.0014711	NA	6.24891	0.0164803	NA	6.20913	0.0898509	0.061	5.98484	0.17037	0.125
YDR288W	NSE3	5.29277	0.00280445	NA	5.24398	0.0209435	NA	5.09959	0.0547457	0.023	5.12316	0.0584802	0.024
YDR289C	RTT103	5.51943	0.044531	NA	5.26181	0.167049	0.057	4.92174	0.309826	0.191	4.86899	0.354498	0.238
YDR291W	HRQ1	3.95077	-0.0053589	NA	3.93379	0.0750358	NA	3.52715	0.0406874	NA	3.21718	0.109349	NA
YDR292C	SRP101	6.16704	0.00419472	NA	6.05911	0.0201662	NA	5.68318	0.065166	0.002	5.28277	0.0424938	NA
YDR293C	SSD1	6.71463	-0.00191902	NA	6.73721	0.0278208	NA	6.69244	-0.0355198	NA	6.79498	-0.102694	-0.041
YDR295C	HDA2	5.67345	0.00355787	NA	5.52859	0.0308564	NA	5.41336	0.0533835	0.019	5.5456	0.0749048	0.039
YDR296W	MHR1	6.37137	0.0575511	NA	6.21611	0.0765223	0.003	5.9408	0.0918796	0.019	5.67036	0.173255	0.092
YDR298C	ATP5	7.93606	0.00270154	NA	7.93064	0.0110423	0.004	7.87152	0.0450465	0.032	8.03073	0.0642036	0.05
YDR299W	BFR2	8.26379	0.00231462	NA	7.99166	0.0551184	0.032	7.57565	0.151126	0.111	7.54522	0.209961	0.168
YDR300C	PRO1	6.29053	0.00517832	NA	6.22083	0.0234969	NA	6.02821	0.0885205	0.051	6.00306	0.0778949	0.043
YDR301W	CFT1	6.28542	0.00820839	NA	6.21105	0.0121548	NA	6.00417	-0.00119823	NA	5.90014	0.0180164	NA
YDR302W	GPI11	5.12275	0.0644588	0.004	5.275	0.198377	0.111	5.19171	0.622612	0.514	5.07394	0.790505	0.707
YDR303C	RSC3	6.38235	0.00165204	NA	6.41801	0.0183937	0.006	6.39574	0.10364	0.075	6.69587	0.113222	0.088
YDR305C	HNT2	5.73697	-0.00328754	NA	5.7704	0.0425767	0.009	5.55984	0.176878	0.116	5.44657	0.253527	0.184
YDR306C		3.99669	0.102655	NA	3.4555	0.0344126	NA	3.03419	0.0763378	NA	2.88888	0.0664478	NA
YDR309C	GIC2	6.92969	0.0135358	NA	6.87193	-0.018268	NA	6.50317	-0.0467422	NA	6.58204	-0.0640454	-0.02
YDR310C	SUM1	6.57191	0.0205822	NA	6.45586	-0.0143798	NA	6.40879	-0.0315758	NA	6.48256	-0.114555	-0.056
YDR312W	SSF2	6.65403	-0.000992902	NA	6.60984	0.0903917	0.027	6.70462	0.20825	0.147	6.96889	0.228681	0.183
YDR316W-A/YDR316W-B		9.24188	0.0853405	0.026	9.19075	0.0831425	0.026	9.38857	0.0725907	0.02	9.53068	0.0706094	0.029
YDR317W	HIM1	1.86883	0.019492	NA	1.8807	0.158882	NA	2.62315	0.293099	0.088	3.09835	0.349847	0.159
YDR321W	ASP1	7.9264	0.000288959	NA	7.93607	0.0245162	0.009	7.9346	0.0915118	0.065	7.73378	0.194688	0.158
YDR322C-A	TIM11	6.95638	0.0171914	NA	6.97783	0.0244025	0.002	6.97887	0.0167046	NA	6.87871	0.0608661	0.035
YDR322W	MRPL35	5.70058	-0.00286484	NA	5.6897	0.0146677	NA	5.59052	0.0282197	0.008	5.4625	0.0328703	0.009
YDR325W	YCG1	5.23147	0.0341346	NA	5.00075	0.185888	0.073	4.6068	0.383776	0.25	4.3369	0.488117	0.353
YDR326C	YSP2	5.74097	0.0196378	NA	5.75009	0.0180216	NA	5.76115	0.0314591	NA	5.90041	0.0480626	0.012
YDR328C	NA	NA	NA	NA	8.72328	0.00135608	NA	8.76139	0.00985187	0.006	8.81635	0.0201934	0.015
YDR330W	UBX5	5.7626	0.0334382	NA	5.56418	0.121966	0.041	5.43909	0.184685	0.109	5.60738	0.249233	0.19
YDR333C	RQC1	7.47275	0.00799214	NA	7.42349	0.0397737	0.019	7.02109	0.0930433	0.062	7.00009	0.13486	0.101
YDR335W	MSN5	6.2077	0.0141813	NA	6.11209	0.0384674	NA	5.90717	0.102242	0.047	5.75055	0.163943	0.101
YDR338C		4.7195	0.00978407	NA	4.67719	0.100335	0.015	4.6066	0.149672	0.059	4.66881	0.104163	0.024
YDR339C	FCF1	5.79261	0.0305937	NA	5.76903	0.105613	0.036	5.45613	0.235425	0.146	5.26678	0.308596	0.217
YDR341C	NA	NA	NA	NA	NA	NA	NA	11.2787	0.000624172	0	11.1403	0.00353675	0.002
YDR345C	HXT3	8.99569	6.49747e-07	NA	9.09356	0.000963468	NA	9.19798	0.00112653	NA	8.92967	0.00727079	0.004
YDR346C	SVF1	8.9953	0.00706985	NA	9.03692	0.0188538	0.002	9.04648	0.0291566	0.014	9.05159	0.0288927	0.015
YDR348C	PAL1	5.72257	0.00635255	NA	5.59088	0.00803153	NA	5.36878	0.0377205	NA	5.1262	0.0502099	NA
YDR349C	YPS7	6.39163	0.0619265	NA	6.35388	0.074048	NA	6.24565	0.188759	0.103	6.23465	0.166471	0.091
YDR352W	YPQ2	4.99525	-0.0545228	NA	4.83674	0.0141431	NA	4.17911	-0.00382143	NA	3.68384	-0.0536139	NA
YDR353W	TRR1	9.239	0.0133951	NA	9.18269	0.0360145	0.014	9.01178	0.1336	0.099	8.81491	0.233196	0.194
YDR356W	SPC110	5.6226	-0.0122692	NA	5.47723	0.00227267	NA	5.05383	0.00530873	NA	5.34492	0.0267363	NA
YDR359C	EAF1	4.9325	0.0131691	NA	4.68227	0.0722008	NA	4.37428	0.0799707	NA	4.35779	0.093273	NA
YDR361C	BCP1	7.49145	0.0294728	NA	7.44601	0.0948785	0.038	7.29154	0.157816	0.104	7.17067	0.181406	0.139
YDR362C	TFC6	4.86969	0.0260598	NA	4.74227	0.125807	0.029	4.43317	0.243217	0.125	4.14502	0.180952	0.069
YDR363W-A	SEM1	7.44603	0.107634	0.026	7.37688	0.0879738	0.019	7.24739	0.0525312	NA	6.65187	0.180162	0.104
YDR365W-A/YDR365W-B		9.25849	0.0660736	0.004	9.27814	0.0504703	NA	9.42828	0.0215017	NA	9.57379	0.0371525	NA
YDR367W	KEI1	6.28709	-0.00147771	NA	6.29131	0.0640164	0.03	6.25557	0.200158	0.149	6.17477	0.47681	0.411
YDR372C	VPS74	7.09834	0.0167325	NA	7.11349	0.0286472	NA	6.94626	0.0828555	0.037	6.90417	0.0159739	NA
YDR374W-A	WIP1	5.41618	0.0494176	NA	5.28154	0.0149581	NA	4.78045	-0.0394969	NA	4.27899	0.0239464	NA
YDR377W	ATP17	6.47421	0.0402493	NA	6.42661	0.0541382	NA	6.13158	-0.000687684	NA	5.70304	-0.110876	-0.04
YDR378C	LSM6	8.14985	0.0344219	NA	8.13435	0.0616864	0.025	7.92811	0.02811	NA	7.59638	0.0490323	0.015
YDR381C-A		4.46404	0.0143395	NA	4.30213	0.0778843	0.015	3.91435	0.131048	0.05	3.75283	0.337105	0.205
YDR381W	YRA1	7.29339	0.057182	NA	7.46445	0.242115	0.158	7.76726	0.490846	0.409	7.90697	0.612334	0.551
YDR384C	ATO3	8.08061	0.00689482	NA	8.01337	0.0266087	NA	7.65833	0.0732586	0.041	7.34782	0.0987319	0.063
YDR385W	EFT2	9.96507	0.00978475	NA	10.0036	0.015138	NA	10.122	-0.0108941	NA	10.1814	-0.00682888	NA
YDR389W	SAC7	5.86832	0.0248955	NA	5.6743	0.0375627	NA	4.96488	0.0370166	NA	5.0353	0.0780734	NA
YDR390C	UBA2	5.99266	0.0274531	NA	5.94543	0.0494888	0.006	5.69018	0.212746	0.14	5.48215	0.243196	0.169
YDR391C		4.87255	-0.00335937	NA	4.69382	-0.00446495	NA	4.32882	0.0258783	NA	4.10463	0.195265	0.093
YDR392W	SPT3	5.50789	0.0131242	NA	5.28464	0.111494	0.017	5.03283	0.0816136	NA	4.88066	0.112583	0.019
YDR397C	NCB2	6.76816	0.0263776	NA	6.67959	0.057611	NA	6.49488	0.069708	0.012	6.14426	0.0403617	NA
YDR398W	UTP5	6.8788	0.000586214	NA	6.80759	0.0111656	0.003	6.86448	0.0517275	0.035	7.00388	0.0543472	0.038
YDR399W	HPT1	8.82437	0.00161864	NA	8.7579	0.00312786	NA	8.37611	0.0105573	0.005	8.08179	0.0129787	0.005
YDR403W	DIT1	1.72136	-0.0461935	NA	1.98887	0.0058602	NA	2.84535	0.175312	NA	3.19822	0.231679	0.06
YDR404C	RPB7	6.53356	-0.00546894	NA	6.3399	0.00264046	NA	5.84729	0.0340494	NA	5.67744	0.0536991	0.004
YDR407C	NA	NA	NA	NA	6.07177	0.0122405	0.001	6.01937	0.118401	0.086	6.08057	0.220308	0.177
YDR408C	ADE8	7.40949	0.0547765	NA	7.33869	0.0727892	NA	7.18865	0.235807	0.148	6.76372	0.35857	0.282
YDR409W	SIZ1	5.46682	0.0324404	NA	5.41612	0.0912894	0	5.26896	0.125246	0.037	5.21401	0.142705	0.059
YDR410C	STE14	8.03284	0.00346251	NA	7.91208	0.0152548	NA	7.43435	0.0283438	0.003	7.04221	0.0628887	0.031
YDR411C	DFM1	6.67843	0.00145923	NA	6.68383	0.0441856	0.022	6.46512	0.210781	0.159	6.17419	0.43489	0.364
YDR412W	RRP17	6.46143	0.000691253	NA	6.34845	0.0103539	NA	6.24051	0.033729	0.016	6.16765	0.0846776	0.056
YDR415C		4.37459	-0.0344903	NA	4.10537	-0.0167408	NA	3.54636	0.0190224	NA	3.25231	0.0823955	NA
YDR418W	RPL12B	10.2394	0.000476864	NA	10.2329	-0.00113475	NA	10.2674	-0.00742	-0.003	10.1476	-0.00894476	-0.005
YDR419W	RAD30	5.20366	0.0342173	NA	5.02371	0.0908081	NA	4.67241	0.166841	0.056	4.67412	0.265173	0.156
YDR421W	ARO80	4.51659	0.078698	NA	4.43551	0.211448	0.066	4.26726	0.336745	0.188	4.42854	0.287037	0.166
YDR422C	SIP1	5.67413	0.00148329	NA	5.56901	0.0813673	0.032	5.23474	0.102835	0.05	5.13557	0.132146	0.071
YDR423C	CAD1	5.25778	0.0198312	NA	5.01701	0.00831549	NA	4.55279	0.00863919	NA	4.31666	0.0236499	NA
YDR428C	BNA7	5.22562	0.0158572	NA	5.17863	0.0551855	NA	4.99649	0.052243	NA	4.88117	-0.00208065	NA
YDR432W/YDR433W	NPL3	10.0984	-0.0206536	NA	10.0575	-0.0501663	NA	10.0201	-0.134412	-0.077	9.75312	-0.177153	-0.13
YDR439W	LRS4	4.60839	0.0428755	NA	4.4234	0.171081	0.039	4.05794	0.281904	0.136	4.00267	0.265354	0.128
YDR441C	APT2	5.72185	0.0414726	NA	5.62769	0.0774625	NA	5.27035	0.0156528	NA	5.18596	0.0243404	NA
YDR447C	RPS17B	10.3206	0.00769779	NA	10.3704	0.0312721	0.007	10.4676	0.0794525	0.049	10.4644	0.142105	0.111
YDR448W	ADA2	5.43444	0.0987084	NA	5.50075	0.0515371	NA	5.55825	-0.0163563	NA	5.55785	-0.0120464	NA
YDR449C	UTP6	4.96005	0.0220599	NA	4.69757	0.0421477	NA	4.30123	0.0710625	NA	4.19963	0.0444325	NA
YDR450W	RPS18A	10.8862	0.00109161	NA	10.9182	0.0137472	0.01	11.0163	0.0699572	0.058	10.9893	0.106392	0.093
YDR452W	PPN1	7.54048	0.0436015	NA	7.49426	0.0480681	NA	7.30127	0.0667288	0.008	7.04265	0.0561423	NA
YDR456W	NHX1	6.98963	0.00195663	NA	7.0305	0.0220701	0.007	6.9005	0.081631	0.056	6.8996	0.141234	0.11
YDR457W	TOM1	7.68117	-0.00123077	NA	7.64679	0.0114012	NA	7.44942	0.0465693	0.026	7.15422	0.108054	0.078
YDR458C	HEH2	4.10457	0.0911529	NA	4.09777	0.120218	0.015	4.106	0.172218	0.067	4.20126	0.20074	0.098
YDR459C	PFA5	6.15077	0.0753986	NA	6.02998	0.153693	0.064	5.75274	0.182263	0.098	5.65822	0.231322	0.151
YDR460W	TFB3	4.19305	0.070494	NA	3.91219	0.282264	0.125	3.25621	0.37744	0.194	3.20518	0.394953	0.204
YDR461W	MFA1	9.97302	0.0043146	NA	10.0444	0.00674784	0.001	10.1163	0.0110514	0.005	10.0127	0.0319707	0.024
YDR463W	NA	NA	NA	NA	NA	NA	NA	6.90276	0.0238282	0.014	7.0242	0.054963	0.041
YDR464W	SPP41	5.34409	0.000626068	NA	5.23314	0.0228394	NA	5.31622	0.133568	0.088	5.44227	0.259697	0.203
YDR466W	PKH3	5.83905	0.0221231	NA	5.54455	0.121467	0.028	5.17044	0.141277	0.049	5.05971	0.168185	0.075
YDR469W	SDC1	5.70393	0.0763321	NA	5.52886	0.0559039	NA	5.03673	0.154132	0.047	4.61999	0.305654	0.18
YDR471W	RPL27B	9.94581	0.00257954	NA	9.96991	0.0376736	0.026	9.97948	0.154699	0.123	9.76395	0.32511	0.281
YDR472W	TRS31	5.36669	0.0101219	NA	5.20133	0.0542269	NA	4.54901	0.102681	0.023	4.33236	0.183319	0.078
YDR473C	PRP3	3.85669	-0.0255942	NA	3.4187	-0.00141821	NA	3.10955	0.248532	0.071	3.034	0.114401	NA
YDR478W	SNM1	5.72716	-0.00271077	NA	5.2383	-0.00386242	NA	4.62411	0.0169872	NA	4.32661	0.0046409	NA
YDR481C	PHO8	5.6401	0.00685772	NA	5.65974	0.0502621	0.017	5.77606	0.187336	0.135	5.77377	0.36827	0.304
YDR483W	KRE2	9.08915	-0.00107819	NA	9.10822	0.0122264	0.006	9.15424	0.0703463	0.055	9.20824	0.170868	0.144
YDR484W	VPS52	5.43535	-0.00881437	NA	5.29239	0.0462644	NA	5.12152	0.178754	0.09	5.31978	0.178934	0.101
YDR485C	VPS72	4.73281	-0.0037165	NA	4.58552	0.0789314	0.025	4.21257	0.25955	0.16	4.19842	0.299728	0.198
YDR486C	VPS60	5.49627	0.0175805	NA	5.37488	0.0335089	NA	5.06144	-0.0437576	NA	4.88899	-0.00436741	NA
YDR490C	PKH1	6.40894	0.0934237	0.005	6.15839	0.0658529	NA	5.56964	0.136659	0.046	5.28911	0.165731	0.068
YDR493W	MZM1	4.46565	-0.0230482	NA	4.29918	0.0646057	NA	3.92877	0.283624	0.148	3.97082	0.444329	0.303
YDR494W	RSM28	5.2362	-0.000439093	NA	5.2064	0.0712646	0.012	4.94966	0.208032	0.124	5.01815	0.217439	0.141
YDR495C	VPS3	5.30141	0.0301729	NA	5.20116	0.0842445	NA	5.10426	0.212205	0.106	5.43381	0.276197	0.185
YDR496C	PUF6	6.69283	0.0226006	NA	6.68413	0.133722	0.074	6.57852	0.360303	0.278	6.56872	0.445529	0.374
YDR497C	ITR1	9.763	0.00842716	NA	9.82811	0.0437324	0.026	9.79082	0.116856	0.088	9.72232	0.15806	0.13
YDR500C	RPL37B	8.81927	0.00975194	NA	8.90801	0.00301283	NA	8.93572	0.0280278	0.011	8.85545	0.0411908	0.024
YDR502C	SAM2	8.426	0.017208	NA	8.51214	0.0216468	0.004	8.47455	0.00226155	NA	8.4472	-0.00250399	NA
YDR507C	GIN4	6.21838	0.0127644	NA	6.06235	0.103747	0.051	5.92803	0.300836	0.223	6.12797	0.429754	0.358
YDR508C	GNP1	8.57545	0.00245979	NA	8.56491	0.0155895	0.008	8.65631	0.0427749	0.032	8.74871	0.0662275	0.054
YDR510W	SMT3	8.65613	0.00270142	NA	8.61377	0.00387591	NA	8.58704	0.00455968	NA	8.22891	0.00930862	NA
YDR515W	SLF1	4.10755	-0.00963519	NA	4.27377	0.209583	0.091	4.5028	0.432534	0.309	5.11993	0.601717	0.505
YDR516C	NA	NA	NA	NA	5.34803	0.0211762	0.003	5.35734	0.112975	0.07	5.85476	0.243525	0.196
YDR517W	GRH1	5.81021	0.0368546	NA	5.71105	0.0321203	NA	5.36059	0.0835071	0.006	4.81103	0.0599469	NA
YDR524C	AGE1	5.9231	0.00284627	NA	5.72332	-0.00478966	NA	5.44025	-0.0394125	NA	5.36705	-0.0590344	NA
YDR524C-B		12.0947	0.000260992	NA	12.1605	0.00630367	NA	12.3172	0.00551576	NA	12.225	0.0471908	0.033
YDR525W-A	SNA2	4.91756	-0.0198445	NA	4.79727	-0.043275	NA	4.41762	-0.069046	NA	4.25167	-0.0997022	-0.019
YDR528W	HLR1	6.77687	0.00177592	NA	6.70667	0.0319311	0.015	6.69804	0.0995921	0.07	6.98309	0.181336	0.147
YDR529C	QCR7	8.57184	0.041611	NA	8.56843	0.0771315	0.018	8.753	0.0724732	0.021	8.76964	0.200453	0.15
YDR530C	APA2	5.46504	0.0272398	NA	5.32109	0.0162969	NA	5.31431	0.0396096	NA	5.19187	0.0526727	NA
YDR533C	HSP31	7.7992	0.0235362	NA	7.72204	0.0310644	NA	7.63993	0.076897	0.042	7.40791	0.181809	0.138
YDR538W	PAD1	5.2248	-0.0158285	NA	5.09722	-0.0453158	NA	4.58824	-0.0176559	NA	4.07033	-0.0496148	NA
YDR539W	FDC1	6.56653	0.00677757	NA	6.55416	0.0514725	NA	6.17299	0.161796	0.091	5.8551	0.247474	0.168
YEL001C	IRC22	7.79327	0.00271793	NA	7.85278	0.00433829	NA	7.89698	0.0172256	0.007	7.71816	0.0479643	0.033
YEL002C	WBP1	7.23787	0.0214366	NA	7.31551	0.0755559	0.002	7.49101	0.174036	0.098	7.60616	0.300696	0.235
YEL006W	YEA6	5.79269	0.0136303	NA	5.61045	0.0115644	NA	5.27259	0.0541445	0.01	5.14616	0.0607925	0.019
YEL007W	MIT1	7.35422	0.065097	NA	7.287	0.170806	0.08	7.11888	0.347023	0.263	7.19008	0.461345	0.39
YEL013W	VAC8	4.72843	0.028126	NA	4.41045	0.0496187	NA	3.87141	0.0197142	NA	3.38631	0.0786117	NA
YEL015W	EDC3	7.32126	0.00151329	NA	7.0962	0.078076	0.023	6.59289	0.193037	0.122	6.371	0.233364	0.164
YEL016C	NPP2	5.52169	-0.0375613	NA	5.38273	-0.0167283	NA	4.95657	0.0243445	NA	4.69863	0.0274768	NA
YEL023C	NA	NA	NA	NA	NA	NA	NA	3.28737	0.273447	0.162	3.52557	0.583497	0.474
YEL027W	VMA3	10.8386	0.00885522	NA	10.8863	0.0120607	0.003	10.9976	0.00382054	NA	11.0561	0.000865788	NA
YEL029C	BUD16	5.45974	-0.0221939	NA	5.29219	0.0532701	NA	4.82818	0.105006	0.003	4.59449	-0.00679563	NA
YEL031W	NA	NA	NA	NA	NA	NA	NA	8.39345	0.00507386	0.002	8.31354	0.0306498	0.022
YEL032W	MCM3	5.63987	0.0417256	NA	5.60996	0.119159	0.025	5.41069	0.182465	0.085	5.35287	0.224096	0.135
YEL038W	UTR4	5.75459	-0.0240747	NA	5.768	-0.00846952	NA	5.58157	-0.0160145	NA	5.25014	0.0126913	NA
YEL042W	GDA1	7.41883	0.00777226	NA	7.41242	0.0180725	NA	7.30904	0.0919386	0.058	6.98011	0.205936	0.159
YEL050C	RML2	6.05462	0.024478	NA	5.92117	0.0136639	NA	5.69626	0.0700202	0.017	5.48148	0.115072	0.067
YEL054C	RPL12A	9.8426	0.0321609	NA	9.81568	0.0240283	NA	9.84605	0.0217342	NA	9.61405	0.0234351	NA
YEL055C	POL5	6.63474	0.0461907	NA	6.47606	0.0423139	NA	6.16003	0.060718	NA	5.8547	0.118667	0.045
YEL056W	HAT2	6.48951	0.000631364	NA	6.29442	0.0208759	NA	5.71377	0.0302591	NA	5.35023	0.0291407	NA
YEL058W	PCM1	8.29166	-0.00174802	NA	8.24412	0.00398504	NA	8.01377	0.0516691	0.033	7.48253	0.130824	0.099
YEL060C	PRB1	5.40163	-0.0105377	NA	5.39137	0.0235513	NA	5.2653	0.0392945	0.01	5.57891	0.0378763	0.01
YEL061C	CIN8	4.56003	0.0438044	NA	4.25215	0.143856	0.017	3.95987	0.288285	0.149	4.01084	0.325573	0.205
YEL064C	AVT2	3.4158	0.0258242	NA	3.34216	0.0551352	NA	3.18688	0.249502	0.087	3.04166	0.217562	0.061
YEL065W	SIT1	6.24404	0.00293008	NA	6.15775	0.03575	0.016	6.00105	0.126068	0.084	6.15035	0.210659	0.164
YEL071W	DLD3	9.47838	0.00165182	NA	9.5069	0.0385179	0.015	9.49705	0.171165	0.138	9.88116	0.320959	0.285
YEL072W	RMD6	2.8439	-0.00672014	NA	2.86439	-0.0182992	NA	2.94556	0.125096	NA	3.0508	0.144381	NA
YER001W	MNN1	6.44735	0.0277131	NA	6.39428	0.119048	0.035	6.09254	0.324651	0.239	6.33228	0.402527	0.335
YER002W	NOP16	5.86905	0.016443	NA	5.82733	0.199802	0.122	5.75969	0.551626	0.45	6.03867	0.652415	0.578
YER003C	PMI40	7.54218	0.0201351	NA	7.60703	0.062503	0.014	7.70867	0.190725	0.128	7.56916	0.353699	0.293
YER006W	NUG1	7.58875	0.00223147	NA	7.59139	0.0205736	0.011	7.51888	0.145244	0.114	7.39283	0.243452	0.204
YER007C-A	TMA20	7.84739	0.013309	NA	7.74456	0.00906272	NA	7.47272	0.0848567	0.026	6.99026	0.107929	0.05
YER007W	PAC2	4.5566	7.70922e-05	NA	4.32457	0.0153004	NA	4.21322	0.086221	NA	4.43358	0.0528375	NA
YER008C	NA	NA	NA	NA	NA	NA	NA	5.68196	0.0493038	0.028	5.83202	0.0975333	0.068
YER012W	PRE1	6.84496	0.00204025	NA	6.85167	0.00175727	NA	6.73637	0.0372035	0.019	6.72753	0.0743929	0.051
YER020W	GPA2	4.98031	0.0791084	NA	4.83272	0.0894309	NA	4.35903	0.101786	NA	4.28542	0.121071	NA
YER021W	RPN3	6.72543	0.00257187	NA	6.83761	0.0278142	0.012	6.98407	0.0846358	0.061	7.36607	0.141784	0.115
YER023W	PRO3	8.54258	-0.000165119	NA	8.49845	0.0428313	0.014	8.66437	0.0688636	0.036	8.52124	0.0928917	0.063
YER026C	CHO1	8.76246	-0.00103178	NA	8.71468	0.0256783	0.01	8.44834	0.0835557	0.06	7.99151	0.138841	0.109
YER027C	GAL83	7.24566	0.0193806	NA	7.09663	0.132374	0.053	6.70395	0.244837	0.161	6.41165	0.304749	0.221
YER031C	YPT31	8.53326	-0.00373474	NA	8.48354	0.0816368	0.015	8.40108	0.197401	0.124	8.28226	0.365788	0.303
YER032W	FIR1	4.93237	0.0159368	NA	4.78073	0.023177	NA	4.36432	0.0723001	NA	4.13626	0.0373182	NA
YER033C	ZRG8	4.08822	-0.0403799	NA	3.78482	0.092531	NA	3.39338	0.0890718	NA	3.05199	-0.0440021	NA
YER035W	EDC2	7.26708	0.0169298	NA	6.92086	0.0351066	NA	6.41865	0.115333	0.061	6.36324	0.144634	0.088
YER036C	ARB1	8.89081	-0.000570913	NA	8.93414	0.00353839	NA	9.05356	0.0359879	0.027	9.21746	0.103793	0.087
YER037W	NA	NA	NA	NA	NA	NA	NA	4.39732	0.0598329	0.02	4.75174	0.0979294	0.055
YER042W	MXR1	5.48947	0.0195159	NA	5.573	0.0765365	NA	5.62049	0.135536	0.058	5.77713	0.273595	0.201
YER047C	SAP1	3.70841	0.0286223	NA	3.50082	0.0549321	NA	3.0939	0.165236	NA	3.25732	0.289773	0.116
YER048W-A	ISD11	6.79574	0.0411879	NA	6.67141	0.0819397	0.009	6.22001	0.016006	NA	5.84993	0.138343	0.064
YER049W	TPA1	6.26113	-0.00163405	NA	6.27769	0.0467741	0.021	6.25288	0.259142	0.199	6.2218	0.47563	0.406
YER050C	RSM18	5.90616	0.00979111	NA	5.83361	0.0492646	0.02	5.59405	0.148303	0.101	5.66497	0.204683	0.153
YER056C-A	RPL34A	11.317	4.59679e-05	NA	11.234	0.000892598	0	11.0539	0.00400412	0.002	10.8169	0.0103634	0.008
YER057C	HMF1	8.69602	0.0021393	NA	8.6485	0.00771872	NA	8.68889	0.00328812	NA	8.57751	0.00270299	NA
YER061C	CEM1	4.51951	0.00593205	NA	4.11419	-0.044822	NA	3.38675	-0.00158257	NA	2.98099	-0.0420267	NA
YER068W	MOT2	5.49043	4.01309e-05	NA	5.36688	0.070984	0.028	5.19844	0.191702	0.126	5.2279	0.246056	0.179
YER070W	RNR1	7.31831	-0.000809187	NA	7.32938	0.013525	NA	7.14557	0.00955958	NA	7.03891	0.0188528	0.005
YER071C	TDA2	6.72597	0.00219688	NA	6.69396	0.0128948	NA	6.49301	0.00566757	NA	6.48515	0.0301741	NA
YER072W	VTC1	8.63137	-0.000182934	NA	8.61509	0.00929125	0.004	8.52774	0.033753	0.024	8.42244	0.0674912	0.054
YER073W	ALD5	8.59782	0.0231003	NA	8.4974	0.0380471	NA	8.44456	-0.0115403	NA	8.47543	-0.0479959	-0.01
YER074W	RPS24A	9.40001	0.00206115	NA	9.50165	0.00736554	0.002	9.55569	0.0186047	0.011	9.61341	0.0194698	0.013
YER074W-A	YOS1	6.47959	0.0509102	NA	6.40551	0.046999	NA	6.25782	0.0968821	0.033	6.09749	0.128563	0.065
YER075C	PTP3	5.19172	0.0407144	NA	5.11599	0.230646	0.113	4.92274	0.442693	0.318	4.84848	0.510558	0.399
YER076C		3.45981	-0.00168711	NA	3.20972	-0.00229549	NA	2.88572	0.15657	NA	2.61623	0.201241	NA
YER077C		3.70276	0.0109716	NA	3.7443	0.184282	0.053	3.65926	0.336916	0.193	3.58867	0.468311	0.32
YER079W		4.60885	0.0192592	NA	4.4648	0.0960306	NA	4.23079	0.201239	0.079	4.40582	0.283348	0.175
YER080W	AIM9	6.82383	-0.00189449	NA	6.73782	0.00588156	NA	6.48175	0.00175558	NA	6.13053	0.0259613	0.006
YER082C	UTP7	5.36471	0.0277474	NA	5.47086	0.0673348	0.021	5.42631	0.112271	0.063	5.37103	0.22969	0.167
YER083C	GET2	6.33981	-0.0104349	NA	6.22026	-0.00677481	NA	5.89086	0.03728	NA	5.58494	0.0506828	NA
YER087W	AIM10	3.98622	0.0765243	NA	3.82368	0.12289	NA	3.76998	0.139139	NA	3.97016	0.12402	NA
YER090W	TRP2	9.14333	-0.00241584	NA	9.09854	0.053798	0.033	9.022	0.292263	0.235	8.9115	0.580204	0.517
YER091C	MET6	8.97686	0.00612595	NA	9.02918	0.0119669	NA	9.09616	0.00868843	NA	9.21132	0.0346934	0.019
YER092W	IES5	5.93627	0.0939018	0.004	5.70481	0.113282	0.027	5.18012	0.131452	0.042	4.71111	0.162312	0.061
YER093C	TSC11	4.62957	0.0230208	NA	4.50801	0.0843621	0.011	4.21551	0.204272	0.102	3.98809	0.333133	0.199
YER094C	PUP3	8.28056	0.00718867	NA	8.15487	0.0159701	0.006	7.75531	0.0397257	0.024	7.46053	0.0597385	0.039
YER096W	SHC1	2.55757	0.0300933	NA	2.67518	0.0397808	NA	2.70828	0.281326	0.14	2.82588	0.434544	0.284
YER100W	UBC6	6.7767	0.0105604	NA	6.72933	0.0222902	0.007	6.5402	0.0556168	0.033	6.57776	0.0353529	0.017
YER102W	RPS8B	10.442	0.0278351	NA	10.4807	0.0364043	NA	10.4848	0.00497292	NA	10.3888	0.00791422	NA
YER105C	NUP157	7.28337	-0.000467294	NA	7.11157	0.0318658	NA	6.55748	0.0783163	0.013	6.13305	0.0748188	NA
YER107C	GLE2	6.21205	-0.0022884	NA	6.13088	0.0499981	0.025	6.07847	0.266353	0.204	6.23368	0.479405	0.412
YER109C	FLO8	4.85675	0.110185	NA	4.6142	0.208096	0.071	4.4512	0.240117	0.113	4.73867	0.28892	0.182
YER110C	KAP123	8.05049	0.00264359	NA	8.03439	0.00970512	NA	8.069	0.0113673	NA	7.87782	0.0105796	NA
YER111C	NA	NA	NA	NA	3.81419	0.0660388	0.014	3.85894	0.332056	0.223	3.90381	0.478204	0.373
YER114C	BOI2	6.7134	0.0422481	NA	6.44185	0.119859	0.044	5.92434	0.226767	0.136	5.52289	0.224801	0.133
YER118C	SHO1	6.437	-0.0104124	NA	6.38434	0.0649843	0.014	6.06883	0.207544	0.133	5.67257	0.328355	0.241
YER120W	SCS2	8.27134	0.0232278	NA	8.30744	0.0861786	0.022	8.26308	0.231803	0.159	7.93797	0.454441	0.39
YER122C	GLO3	8.34712	0.0537991	NA	8.28337	0.0750924	0.014	8.11609	0.0835733	0.027	7.91587	0.0984418	0.049
YER125W	RSP5	6.58282	0.0104825	NA	6.55561	0.010434	NA	6.5999	0.0148873	0	6.75752	0.0243008	0.013
YER126C	NSA2	6.44833	-0.0276856	NA	6.36181	0.0122491	NA	5.91394	0.165822	0.103	5.77835	0.352103	0.272
YER127W	LCP5	5.59553	0.0117583	NA	5.59029	0.130567	0.066	5.41175	0.370282	0.276	5.44199	0.527471	0.44
YER128W	VFA1	5.94672	0.00159297	NA	5.87973	0.0234299	NA	5.55063	0.0706846	0.036	5.45861	0.122212	0.075
YER131W	RPS26B	9.33975	-0.000335671	NA	9.40093	0.00539564	0.002	9.38439	0.0306167	0.023	9.39978	0.0799461	0.067
YER134C		5.74547	0.0375827	NA	5.61398	0.0249981	NA	5.07975	0.048062	NA	4.51065	0.0862475	0.022
YER136W	GDI1	7.36989	0.0103296	NA	7.42226	0.0256076	NA	7.48652	0.0265222	NA	7.8919	0.0236974	NA
YER137C-A/YER138C		9.46028	0.085661	0.021	9.45207	0.065074	0.003	9.66615	0.0346594	NA	9.78646	0.0472774	NA
YER138W-A		6.63374	-0.0349437	NA	6.53354	-0.0631367	NA	6.41395	-0.1596	-0.081	6.14689	-0.306624	-0.226
YER142C	MAG1	3.9065	0.0565666	NA	3.79385	-0.0311336	NA	3.37105	-0.0272589	NA	3.42445	0.0416961	NA
YER143W	DDI1	5.83284	0.0264808	NA	5.58657	0.0710822	0.016	5.12749	0.153715	0.077	5.10541	0.172592	0.096
YER145C	FTR1	5.94489	0.0149987	NA	6.01208	-0.00857594	NA	6.05716	-0.00128306	NA	6.17902	-0.00365409	NA
YER147C	SCC4	6.13121	0.0184816	NA	5.98381	-0.00873839	NA	5.7833	-0.0100874	NA	5.57276	-0.0157199	NA
YER159C-A/YER160C		6.03241	0.0080746	NA	6.05845	0.00202343	NA	6.24587	0.0130441	NA	6.2887	-0.0245084	NA
YER164W	CHD1	5.51124	0.0455995	NA	5.63011	0.245231	0.144	5.7442	0.522092	0.418	5.70582	0.629636	0.545
YER165W	PAB1	10.6999	0.0100102	NA	10.6768	0.0162635	NA	10.766	-0.00122622	NA	10.7265	0.00607543	NA
YER166W	DNF1	7.30982	0.0334978	NA	7.28183	0.0553591	0.013	7.10321	0.142862	0.089	6.77211	0.191792	0.136
YER168C	CCA1	5.1208	-0.00240829	NA	5.027	0.108854	0.034	4.9494	0.245107	0.154	4.95091	0.379701	0.285
YER171W	RAD3	6.23786	0.0137826	NA	6.12411	0.0247965	NA	5.79479	0.0338625	0.006	5.44673	0.0999571	0.051
YER175C	TMT1	6.58575	0.0107388	NA	6.26282	-0.0111804	NA	5.63444	-0.0327717	NA	4.90179	0.00833551	NA
YER176W	ECM32	7.84757	-0.0024083	NA	7.67037	0.0112018	NA	7.32938	0.0838187	0.059	7.16278	0.160409	0.124
YER177W	BMH1	10.7547	-0.0262954	NA	10.7957	-0.0186112	NA	10.9787	-0.0255715	NA	10.9831	0.0030377	NA
YER178W	PDA1	9.9026	0.038395	0.011	9.93047	0.0391419	0.013	9.91821	-0.00251995	NA	9.96559	-0.0214775	NA
YER183C	NA	NA	NA	NA	NA	NA	NA	5.74545	0.0245274	0.011	5.84788	0.0771835	0.052
YER186C		5.839	0.0207023	NA	5.72273	0.0366639	NA	5.51568	0.0352633	NA	5.25181	0.0486774	NA
YFL002W-A/YFL002W-B		5.92287	0.056912	NA	5.87745	0.0316174	NA	5.94989	-0.00973877	NA	6.07663	0.0638638	NA
YFL004W	VTC2	7.36495	0.0104903	NA	7.34468	0.0684363	0.001	7.23403	0.149594	0.08	6.87783	0.314328	0.244
YFL009W	NA	NA	NA	NA	NA	NA	NA	5.93689	0.0301637	0.015	6.15421	0.0602103	0.04
YFL010C	WWM1	9.45876	0.00020896	NA	9.44854	0.000779317	NA	9.39996	0.00195809	0	9.32481	0.00277383	0
YFL013C	IES1	4.84119	0.0461238	NA	4.59916	0.0846433	NA	4.11016	0.108664	NA	4.24213	0.10475	NA
YFL014W	HSP12	7.23225	0.00612644	NA	7.17653	0.0158103	NA	7.01935	-0.0174387	NA	7.06046	-0.0116614	NA
YFL017C	GNA1	7.88759	0.00495195	NA	7.86875	0.0342673	0.007	7.61012	0.111252	0.07	7.17613	0.203255	0.149
YFL026W	STE2	9.27608	0.0370097	NA	9.20769	0.08891	0.029	8.96944	0.171795	0.108	8.89955	0.215331	0.162
YFL033C	RIM15	4.74591	0.00965118	NA	4.78638	0.0616488	NA	5.09767	0.183557	0.12	5.62119	0.250737	0.195
YFL034C-A	RPL22B	8.68163	0.00172478	NA	8.65351	0.00362619	0	8.47585	0.00736826	0.003	7.98971	0.0109775	0.004
YFL034C-B	MOB2	5.22349	0.031011	NA	5.47361	0.0665404	0.009	6.0481	0.149246	0.094	5.93903	0.165593	0.115
YFL034W	NA	NA	NA	NA	NA	NA	NA	4.51244	0.0853338	0.044	4.64312	0.213473	0.153
YFL037W	TUB2	7.93062	0.0111345	NA	7.97769	0.0179398	NA	8.12716	0.0521546	0.032	8.14603	0.14505	0.118
YFL038C	YPT1	9.79777	0.00116859	NA	9.78218	0.0064737	0.003	9.82034	0.0289363	0.022	9.41855	0.0887249	0.074
YFL039C	ACT1	10.985	-0.00097872	NA	11.0123	0.0363843	0.005	11.1266	0.0927595	0.054	11.1286	0.198941	0.159
YFL041W-A		2.80697	0.115813	NA	2.85831	0.0423682	NA	2.90817	0.301303	0.123	3.20222	0.337879	0.178
YFL044C	OTU1	3.57006	-0.119172	NA	3.48027	-0.0899924	NA	3.37587	-0.11665	NA	3.00803	-0.262754	-0.087
YFL047W	RGD2	6.83307	0.00271037	NA	6.80767	0.0154014	NA	6.82243	0.0631152	0.024	6.88597	0.15147	0.107
YFL049W	SWP82	6.38612	0.00500732	NA	6.34659	0.0671673	0.039	6.01101	0.177387	0.127	5.86581	0.24141	0.183
YFL057C	AAD16	4.41518	0.0478906	NA	4.26072	0.380573	0.212	4.34717	0.664756	0.519	4.56978	0.73427	0.624
YFR001W	LOC1	6.93703	-0.00142671	NA	6.83711	0.011107	NA	6.74942	0.0849636	0.059	6.63859	0.135848	0.103
YFR004W	RPN11	6.37134	0.00413968	NA	6.36964	0.00895712	0	6.38332	0.0878735	0.061	6.63996	0.149455	0.119
YFR009W/YFR009W-A	GCN20	7.67585	-0.00579413	NA	7.61782	0.0333681	0.007	7.32371	0.109931	0.071	6.98252	0.145991	0.104
YFR013W	IOC3	5.59495	0.0262518	NA	5.44967	0.0654325	0.027	5.11912	0.255134	0.174	4.77237	0.337783	0.239
YFR014C	CMK1	5.17071	0.0023798	NA	5.14453	0.00907329	NA	4.88822	0.0687886	0.028	4.72258	0.0665184	0.022
YFR016C		6.345	0.0329632	0.003	6.0968	0.0101893	NA	5.85748	0.0215872	NA	5.27552	0.0490686	0.006
YFR020W		3.039	-0.0256899	NA	2.9183	-0.169063	-0.003	2.79479	-0.206957	-0.052	2.78713	-0.194939	-0.045
YFR021W	ATG18	5.11617	0.0146667	NA	4.89864	0.0178457	NA	4.48048	-0.00292362	NA	4.15825	0.0658132	NA
YFR024C-A	LSB3	6.88246	0.00329645	NA	6.99899	0.0746517	0.001	6.97754	0.136768	0.062	7.04873	0.332666	0.261
YFR031C	SMC2	5.20949	0.0130543	NA	4.9595	0.0585176	0.021	4.91033	0.155176	0.098	4.99998	0.228269	0.165
YFR031C-A	RPL2A	11.1677	0.0106798	NA	11.1808	0.0247424	NA	11.1827	0.0113211	NA	10.8537	0.077695	0.028
YFR037C	RSC8	8.48484	0.0266713	NA	8.44136	0.0162126	NA	8.37161	-0.079695	-0.012	8.42641	0.00877364	NA
YFR040W	SAP155	5.61039	0.0306259	NA	5.7336	0.157664	0.076	6.0641	0.315534	0.23	6.19841	0.44583	0.364
YFR045W		4.48124	0.0322539	NA	4.16158	0.0824822	0.014	3.83204	0.170127	0.076	3.77396	0.194136	0.089
YFR046C	CNN1	3.75304	0.100015	NA	3.72208	-0.0050147	NA	3.47962	0.148532	0.024	3.308	0.160864	0.027
YFR050C	PRE4	7.56969	0.0315066	NA	7.54682	0.0456927	0.011	7.57564	0.0788652	0.046	7.90973	0.0975679	0.071
YFR052C-A/YFR053C	HXK1	7.66577	0.000554364	NA	7.60263	0.00603161	0	7.58679	0.0281541	0.018	7.52008	0.114764	0.09
YFR052W	RPN12	7.3667	0.0576424	NA	7.30819	0.187031	0.092	7.04068	0.296742	0.207	6.73936	0.382415	0.305
YGL001C	ERG26	6.61694	0.0675558	NA	6.60705	0.155202	0.067	6.60806	0.320419	0.232	6.52492	0.481573	0.408
YGL003C	CDH1	5.84882	0.0662371	NA	5.61855	0.220758	0.109	5.2408	0.265441	0.165	5.07098	0.297332	0.203
YGL004C	RPN14	3.98825	0.104836	NA	3.81222	0.0409987	NA	3.09601	0.201228	0.029	2.92094	0.123847	NA
YGL006W	PMC1	5.55243	0.0732816	NA	5.43079	0.115624	0.022	5.39144	0.206054	0.11	5.16118	0.327661	0.226
YGL011C	SCL1	8.81764	0.0205051	NA	8.77184	0.05821	0.012	8.61027	0.187375	0.125	8.62592	0.267361	0.211
YGL013C	PDR1	6.35164	0.00829046	NA	6.28931	0.0364063	NA	6.05729	0.03454	NA	5.83147	0.0412774	NA
YGL014W	PUF4	7.11322	-0.00045632	NA	7.1552	0.0103315	0.002	7.17982	0.0451462	0.031	7.26249	0.125532	0.102
YGL016W	KAP122	6.46821	0.0105005	NA	6.44492	0.00454145	NA	6.46794	0.00395984	NA	6.25467	-0.00837336	NA
YGL017W	ATE1	5.07052	0.000321186	NA	5.02747	0.0855054	0.034	4.69599	0.363676	0.26	4.63914	0.483055	0.379
YGL018C	JAC1	5.56797	0.020517	NA	5.37418	0.0313962	NA	4.82175	0.070952	NA	4.68522	0.045288	NA
YGL021W	ALK1	5.08811	0.0876768	NA	4.98792	0.157883	0.046	5.24692	0.245266	0.143	5.48857	0.299265	0.218
YGL022W	STT3	7.95725	0.0857358	0.012	8.02412	0.0916562	0.021	8.07998	0.144811	0.074	7.78407	0.305063	0.238
YGL028C	SCW11	7.51315	0.0132739	0.001	7.39009	0.0160421	0.007	7.27081	0.0185965	0.01	7.08194	0.022211	0.015
YGL030W	RPL30	11.1107	0.00257795	NA	11.1485	0.0094399	0.004	11.1991	0.0239092	0.017	11.1325	0.0417873	0.033
YGL031C	RPL24A	9.32833	0.0382725	NA	9.37585	0.0840839	0.02	9.47723	0.302914	0.226	9.46238	0.494419	0.428
YGL032C	AGA2	8.19723	0.00320482	NA	8.21191	0.00646523	NA	8.12024	0.0103721	0	7.80089	0.0187898	0.007
YGL038C	OCH1	7.4682	0.0676157	0.011	7.2862	0.126982	0.069	6.80576	0.121167	0.07	6.68084	0.148937	0.104
YGL043W	DST1	4.95179	-0.0319814	NA	4.68477	0.0161342	NA	4.46752	0.0236969	NA	4.2351	0.00892448	NA
YGL044C	RNA15	5.14179	0.086294	NA	5.08335	0.230879	0.103	4.98119	0.233422	0.124	4.70983	0.302461	0.198
YGL045W	RIM8	4.92742	0.0393483	NA	4.74353	0.139957	0.052	4.61728	0.164459	0.084	4.47747	0.220082	0.127
YGL047W	ALG13	5.78015	0.00556508	NA	5.51064	0.00132735	NA	5.00254	0.0381857	NA	4.42818	0.0764541	NA
YGL048C	RPT6	7.79275	0.00210306	NA	7.76229	0.0103288	0.004	7.75144	0.0429219	0.031	7.71085	0.138431	0.113
YGL054C	ERV14	7.25967	0.0184281	NA	7.26311	0.0168189	0.002	7.1393	-0.000675117	NA	7.08286	-0.00630662	NA
YGL055W	OLE1	9.12109	0.0115425	NA	9.10592	0.0477968	0.011	8.81954	0.178744	0.123	8.61155	0.195579	0.15
YGL059W	PKP2	5.78882	0.03378	NA	5.46455	0.0190465	NA	5.00277	0.0490815	NA	4.88776	0.0254241	NA
YGL060W	YBP2	4.46385	-0.00715015	NA	4.18805	0.0476089	NA	3.79701	0.0448178	NA	3.37382	-0.0913608	NA
YGL061C	DUO1	5.2468	0.0203485	NA	5.16777	0.0905752	0.026	4.83519	0.145801	0.069	4.65591	0.211419	0.117
YGL062W	PYC1	8.12819	-0.00704495	NA	8.17685	0.0697355	0.002	8.22602	0.17675	0.106	8.44992	0.298716	0.243
YGL065C	ALG2	6.31181	0.00260425	NA	6.11001	0.0213634	NA	5.78779	0.0501984	0.02	5.59586	0.0757464	0.037
YGL066W	SGF73	6.16197	0.021661	NA	5.94468	0.1578	0.061	5.78439	0.247278	0.155	5.62097	0.291369	0.211
YGL067W	NPY1	6.64962	0.0017519	NA	6.64849	0.0219396	0.008	6.61829	0.181229	0.137	6.46112	0.33726	0.28
YGL068W	MNP1	7.12856	0.0556633	NA	7.09722	0.120285	0.051	6.87036	0.129203	0.067	6.53607	0.203853	0.143
YGL070C	RPB9	5.41126	0.0483846	NA	5.28986	0.107754	0.013	4.93083	0.171065	0.069	4.75958	0.243975	0.144
YGL073W	HSF1	6.84966	0.00313585	NA	6.74755	0.0191251	0.003	6.73391	0.0711567	0.047	6.70986	0.129452	0.098
YGL076C	RPL7A	10.8461	-0.000180206	NA	10.8786	0.00166551	0	11.0753	0.0159592	0.012	11.224	0.02719	0.023
YGL077C	HNM1	7.90493	0.00466738	NA	7.94143	0.0400792	0.023	7.75219	0.173783	0.135	7.67483	0.277431	0.232
YGL084C	GUP1	6.40855	0.0247289	NA	6.34957	0.0803329	0.034	6.10148	0.213076	0.146	5.85475	0.326044	0.252
YGL092W	NUP145	6.76396	-0.0182412	NA	6.72366	0.0541053	NA	6.52746	0.084679	0.011	6.28197	0.103571	0.036
YGL095C	VPS45	4.93755	0.0258875	NA	4.92783	0.0833643	NA	4.96653	0.146971	0.045	4.90574	0.158508	0.064
YGL098W	USE1	3.3051	-0.0122308	NA	2.99422	-0.116054	NA	2.86051	-0.0348011	NA	3.36866	-0.054661	NA
YGL100W	NA	NA	NA	NA	6.95849	0.0195039	0.009	7.11123	0.103189	0.078	6.92449	0.193769	0.159
YGL103W	RPL28	11.3071	-0.000124612	NA	11.3567	0.00189153	0	11.4993	0.0024248	0	11.5267	0.0028136	0.001
YGL106W	MLC1	5.57734	0.0315074	NA	5.6566	0.09647	0.02	5.79469	0.188663	0.114	5.94126	0.283899	0.225
YGL111W	NSA1	5.49196	0.0112905	NA	5.43637	0.038959	NA	5.32404	0.0862335	0.041	5.24013	0.187975	0.125
YGL114W		5.26824	0.00621285	NA	5.28547	0.0777687	0.013	5.44506	0.115418	0.05	5.52321	0.0960904	0.04
YGL116W	CDC20	6.0086	0.0803615	0.002	6.07313	0.0262916	NA	6.21869	-0.13696	-0.062	6.19449	-0.209294	-0.135
YGL117W		7.5912	0.0168282	NA	7.28002	0.0709521	0.026	6.61196	0.131105	0.074	6.21889	0.134562	0.073
YGL119W	COQ8	4.66371	0.0163534	NA	4.68726	0.202936	0.107	4.48786	0.507759	0.384	4.49532	0.623913	0.521
YGL120C	PRP43	6.76482	0.00138032	NA	6.84368	0.00859458	NA	6.79736	0.0677606	0.045	6.66259	0.137316	0.105
YGL122C	NAB2	7.43239	-0.00343156	NA	7.00478	0.0160116	NA	6.27393	0.0514168	0.018	6.26763	0.100319	0.058
YGL123W	RPS2	10.8212	-0.000437061	NA	10.8528	0.000441745	NA	10.9775	0.00766964	0.005	10.9996	0.0206213	0.017
YGL124C	MON1	3.30046	0.0572655	NA	3.46176	0.18335	0.049	3.40764	0.496584	0.332	3.53384	0.609725	0.471
YGL129C	RSM23	6.1177	0.0252567	NA	6.07818	0.0271001	NA	5.79579	0.00791336	NA	5.78368	0.0711876	0.029
YGL130W	CEG1	5.9882	0.0473704	NA	5.9936	0.0842264	0.02	5.51892	0.275507	0.18	5.31077	0.416035	0.313
YGL134W	PCL10	4.75979	0.0066826	NA	4.60549	0.0131549	NA	4.94848	0.0299005	NA	4.9604	0.0809964	0.041
YGL137W	SEC27	8.58888	0.0408621	NA	8.50023	0.0440643	NA	8.34091	0.0699009	0.023	7.96299	0.125976	0.085
YGL139W	FLC3	5.70917	0.0234543	NA	5.81101	0.0531723	NA	5.69876	0.0819899	0.031	5.78267	0.102745	0.058
YGL142C	GPI10	5.13356	0.0336644	NA	5.11096	0.149934	0.069	4.94602	0.406887	0.298	4.99234	0.50095	0.405
YGL143C	MRF1	4.0521	0.117468	NA	3.8838	0.0909382	NA	3.15838	-0.00218757	NA	2.72328	-0.00181429	NA
YGL144C	ROG1	4.6105	-0.00412127	NA	4.60583	0.0840818	0.028	4.45493	0.171853	0.1	4.65702	0.169147	0.107
YGL145W	TIP20	5.98815	0.039347	NA	5.91573	0.146858	0.064	5.89289	0.215894	0.142	5.82731	0.18641	0.124
YGL147C	RPL9A	10.6616	2.79887e-06	NA	10.7426	0.00147976	0	10.8764	0.00639877	0.004	10.8197	0.0118192	0.009
YGL148W	ARO2	8.87246	0.00031682	NA	8.84764	0.00956147	0.001	9.02086	0.0350115	0.023	8.98754	0.0917891	0.074
YGL151W	NUT1	7.16982	0.00371456	NA	7.18191	0.010835	0	6.94162	0.0401667	0.024	6.85327	0.0508409	0.032
YGL155W	CDC43	5.01393	0.0163393	NA	4.71101	0.0244721	NA	4.2739	-0.0241019	NA	3.69996	0.0204227	NA
YGL159W		5.25057	0.054689	NA	5.12743	0.0613395	NA	4.38926	-0.00558387	NA	4.09815	0.00455065	NA
YGL163C	RAD54	5.93541	0.0446999	NA	5.81095	0.0937568	0.026	5.62809	0.291366	0.214	5.79141	0.321783	0.257
YGL167C	NA	NA	NA	NA	NA	NA	NA	7.90583	0.0133999	0.008	7.93385	0.0432632	0.032
YGL171W	ROK1	5.7009	0.017603	NA	5.47465	0.020475	NA	4.88738	0.0220073	NA	4.65725	0.076624	0.009
YGL173C	XRN1	8.57456	0.0194239	NA	8.4628	0.0349636	NA	8.31069	0.0683271	0.02	7.96555	0.103568	0.056
YGL174W	BUD13	4.4808	0.00332095	NA	4.28358	0.027174	NA	4.14485	0.029296	NA	4.16171	0.0786705	0.01
YGL176C		4.75031	0.0535831	NA	4.7132	0.201874	0.108	4.49296	0.542865	0.418	4.63071	0.611268	0.513
YGL179C	NA	NA	NA	NA	4.02869	0.0667414	0.015	4.38297	0.132825	0.077	4.43293	0.268615	0.195
YGL185C		3.5099	0.071711	NA	3.43086	0.135769	0.022	3.05203	0.163781	0.042	2.68252	0.357722	0.157
YGL186C	TPN1	7.86525	0.00124779	NA	7.83708	0.00909121	0.003	7.51385	0.0282846	0.018	7.22537	0.0453824	0.029
YGL189C	RPS26A	11.5986	0.000455979	NA	11.5779	0.0028627	0.001	11.7202	0.00483343	0.003	11.5434	0.0129607	0.01
YGL190C	CDC55	5.14924	0.0453278	NA	4.88001	0.0566882	NA	4.77854	0.0596747	NA	4.8497	0.10835	NA
YGL191W	COX13	6.74499	0.0356542	NA	6.78967	0.0715685	0.006	6.85831	0.113453	0.051	6.71997	0.228478	0.173
YGL194C	HOS2	4.06736	0.0146101	NA	4.09038	0.0349089	NA	3.83029	0.18932	0.101	3.61972	0.376879	0.25
YGL196W	DSD1	6.0227	0.00685034	NA	6.06745	0.0883728	0.022	6.08443	0.258173	0.174	6.11869	0.331525	0.256
YGL197W	MDS3	4.28337	0.0157821	NA	3.83134	0.0738862	NA	3.3235	-0.0310933	NA	3.10317	-0.16747	NA
YGL198W	YIP4	6.99331	0.0123746	NA	6.80673	0.0431823	0.012	6.37125	0.106374	0.063	5.96819	0.0516339	0.011
YGL200C	EMP24	10.4842	0.00034877	NA	10.456	0.00403615	0.001	10.3811	0.018835	0.014	10.0494	0.0472243	0.038
YGL201C	MCM6	5.53725	0.0425512	NA	5.38794	0.127928	0.031	5.07738	0.225263	0.117	5.10382	0.284955	0.187
YGL202W	ARO8	9.61022	-0.000817811	NA	9.61652	-0.00073871	NA	9.62202	0.00323098	0.001	9.59375	0.00544307	0.003
YGL203C	KEX1	5.45672	0.00694415	NA	5.47551	0.163854	0.083	5.32269	0.41239	0.311	5.19942	0.642444	0.549
YGL207W	SPT16	8.36027	0.010131	NA	8.26469	0.102	0.048	8.07753	0.379787	0.298	7.8695	0.599295	0.534
YGL210W	YPT32	5.73999	0.00911576	NA	5.79874	0.0971985	0.048	5.94874	0.210053	0.151	6.0774	0.31011	0.251
YGL213C	SKI8	6.24164	0.00366989	NA	6.22453	0.0937873	0.018	5.81134	0.250936	0.155	5.54009	0.32483	0.23
YGL219C	MDM34	6.48254	0.00423454	NA	6.39955	0.0133317	0.002	6.45052	0.0814006	0.057	6.57611	0.152298	0.121
YGL225W	VRG4	10.0339	0.00599871	NA	10.0607	0.0153862	0.003	9.86511	0.0544771	0.037	9.45268	0.100141	0.079
YGL226C-A	OST5	8.61888	0.000345641	NA	8.63175	0.0023006	NA	8.50248	0.0120398	NA	8.34654	0.0242917	0.011
YGL227W	VID30	5.1078	-0.0345573	NA	5.02848	0.0650919	NA	4.92277	0.091997	NA	4.97519	0.126665	0.046
YGL228W	NA	NA	NA	NA	NA	NA	NA	6.01529	0.054644	0.033	6.38962	0.168165	0.135
YGL229C	SAP4	4.03889	-0.0326428	NA	3.97069	0.0261398	NA	3.74877	0.0846716	NA	3.41204	0.261959	0.108
YGL231C	EMC4	6.92093	0.00252123	NA	6.9219	0.0030256	NA	6.86776	0.0310517	0.011	6.52135	0.0574982	0.031
YGL232W	NA	NA	NA	NA	NA	NA	NA	6.53676	0.02899	0.017	6.67878	0.114718	0.09
YGL237C	HAP2	4.61764	0.120908	NA	4.45583	0.348447	0.172	4.31574	0.504229	0.351	4.28937	0.543875	0.411
YGL238W	CSE1	8.89846	0.00271287	NA	8.86501	0.0227943	0.014	8.68732	0.162457	0.132	8.70084	0.334488	0.292
YGL242C		4.98588	0.0192717	NA	4.9301	0.0707206	NA	4.96449	0.217085	0.121	4.85497	0.365892	0.264
YGL245W	GUS1	8.50641	0.000409469	NA	8.49642	0.00177867	NA	8.65394	0.00709458	0.003	8.7147	0.0246728	0.018
YGL247W	BRR6	6.60497	-0.00796631	NA	6.45664	-0.0315819	NA	6.05935	-0.0308685	NA	5.90041	-0.0185562	NA
YGL250W	RMR1	4.1892	0.0186073	NA	3.9846	0.0455384	NA	3.52934	0.0139932	NA	3.00932	0.151361	NA
YGL252C	RTG2	5.72342	0.00530622	NA	5.58621	0.0621257	0.025	5.4145	0.21947	0.153	5.4867	0.320614	0.25
YGL253W	HXK2	10.8512	0.0111834	0.002	10.8876	0.0108859	0.003	10.9885	0.00876898	NA	11.1744	0.0151122	0.008
YGL256W	ADH4	4.64969	0.0322372	NA	4.69849	0.0868616	NA	4.88038	0.141306	0.06	5.23404	0.1688	0.099
YGL257C	MNT2	5.48974	0.0303301	NA	5.44698	0.0174152	NA	5.30148	0.0602095	0.013	4.97261	0.113996	0.051
YGR004W	PEX31	4.93404	0.0151001	NA	4.82476	0.0618443	NA	4.71536	0.173494	0.089	4.60871	0.195001	0.103
YGR009C	SEC9	5.27126	0.0325371	NA	5.12351	0.0387358	NA	4.72907	0.0567278	NA	4.61184	0.0822488	0.026
YGR010W/YGR011W	NMA2	5.67457	0.00864253	NA	5.46096	0.00783624	NA	5.12668	0.0622482	NA	4.86726	0.0755404	NA
YGR012W		6.14552	0.00513908	NA	6.07047	0.0705427	0.022	5.57201	0.134943	0.071	5.24492	0.229265	0.143
YGR014W	MSB2	7.18043	0.0065353	NA	7.16442	0.0335801	0.006	7.03969	0.0641104	0.033	7.05152	0.0638886	0.036
YGR015C		5.13556	0.0242505	NA	5.00223	0.0374317	NA	4.78797	0.0817144	0.018	4.68106	0.114843	0.044
YGR019W	UGA1	5.41337	0.00662476	NA	5.32479	0.03454	NA	5.27559	0.024239	NA	5.0924	0.0910012	0.038
YGR020C	VMA7	9.51459	0.000651838	NA	9.50653	0.00137714	NA	9.50419	0.00147108	NA	9.48149	0.00135841	NA
YGR026W		7.83252	0.00666962	NA	7.78214	0.0318632	0.005	7.78406	0.0942293	0.06	7.6841	0.226598	0.181
YGR027C	RPS25A	10.8334	-0.000419465	NA	10.9024	0.00128417	0	11.0666	0.0122069	0.009	11.2201	0.0266684	0.022
YGR027W-A/YGR027W-B		9.92195	0.100727	0.026	9.89363	0.101405	0.028	10.1285	0.0705631	NA	10.2487	0.0900651	0.037
YGR028W	MSP1	4.70692	-0.000196038	NA	4.65251	0.0387398	NA	4.34539	0.085602	0.013	4.34664	0.195461	0.103
YGR029W	ERV1	6.56182	0.0347991	NA	6.45288	0.0499179	NA	6.35044	0.248803	0.169	6.06135	0.484561	0.399
YGR034W	RPL26B	10.1782	-0.00114629	NA	10.213	0.0288102	0.021	10.2981	0.213923	0.178	10.303	0.431361	0.384
YGR037C	ACB1	8.96086	0.00155342	NA	8.94034	0.0125338	NA	9.02114	-0.00640509	NA	8.68314	0.0408723	0.02
YGR038C-A/YGR038C-B		8.16019	0.0450067	NA	8.14868	0.0166977	NA	8.29301	0.00451436	NA	8.41296	0.0315442	NA
YGR038W	ORM1	6.76364	0.0360896	NA	6.67461	0.0680406	0.021	6.33692	0.121373	0.073	6.12151	0.131744	0.085
YGR041W	BUD9	6.54777	0.0038867	NA	6.27736	0.0274969	NA	5.73986	0.0237063	NA	5.38606	0.0267588	NA
YGR042W		5.33234	0.103206	NA	5.67758	0.28271	0.164	6.05834	0.363797	0.264	6.168	0.383998	0.306
YGR048W	NA	NA	NA	NA	NA	NA	NA	6.19465	0.0478691	0.029	6.44184	0.130401	0.101
YGR049W	SCM4	5.02214	0.00141939	NA	4.94112	0.0767474	NA	4.57329	0.219543	0.118	4.39943	0.251201	0.148
YGR050C		3.16816	0.10834	NA	3.05977	0.0355901	NA	2.77885	0.0180624	NA	2.44444	0.161311	NA
YGR054W		8.02392	-0.00105643	NA	7.94989	0.026264	NA	7.68263	0.0553507	0.023	7.64661	0.10287	0.072
YGR055W	MUP1	7.79523	0.00351692	NA	7.73634	0.00760291	NA	7.72911	0.0149324	0.007	7.88699	0.0117988	0.005
YGR059W	SPR3	1.00549	-0.212816	NA	1.4389	-0.532721	-0.171	2.02949	-0.663637	-0.366	2.69198	-0.660255	-0.406
YGR060W	ERG25	9.16009	0.00572656	NA	9.18527	0.0447363	NA	9.32191	0.00617697	NA	9.35933	0.0935617	0.047
YGR061C	ADE6	10.2596	-0.000885335	NA	10.2848	0.00729164	0.004	10.202	0.0472564	0.037	10.0472	0.168187	0.143
YGR062C	COX18	4.44178	0.0313122	NA	4.36262	0.0801931	NA	4.37615	0.258886	0.149	4.53621	0.337852	0.238
YGR063C	SPT4	5.8599	-0.0171139	NA	5.79113	-0.0158509	NA	5.58149	-0.0490666	NA	5.53955	-0.0347054	NA
YGR082W	TOM20	7.20053	0.00142808	NA	7.12586	0.0181202	0.008	6.90618	0.0746763	0.051	6.70321	0.190973	0.15
YGR083C	GCD2	5.81328	-0.00417123	NA	5.94472	0.075108	0.038	6.25995	0.247907	0.19	6.5341	0.281168	0.232
YGR085C	RPL11B	9.5442	0.0026229	NA	9.50526	0.00571741	0.001	9.45774	0.00855725	0.003	9.0335	0.0151823	0.008
YGR086C	PIL1	10.1601	0.0347387	NA	10.0927	0.0464614	NA	10.0307	0.0104761	NA	9.94754	0.0291166	NA
YGR091W	PRP31	4.85178	0.0934799	NA	4.63167	0.110089	NA	4.20791	0.259148	0.122	4.26975	0.237538	0.117
YGR092W	DBF2	5.42868	0.077948	NA	5.41416	0.298256	0.176	5.3695	0.566762	0.451	5.59546	0.699145	0.614
YGR094W	NA	NA	NA	NA	8.80299	0.000690208	NA	8.94599	0.0168174	0.012	9.02352	0.0678947	0.057
YGR095C	RRP46	6.6223	0.0136405	NA	6.44601	0.141942	0.068	6.14842	0.39296	0.294	6.17148	0.49862	0.414
YGR097W	ASK10	7.0454	0.0601793	0.005	6.93947	0.146539	0.075	6.50605	0.337597	0.252	6.37115	0.398989	0.321
YGR098C	ESP1	5.23823	0.0373804	NA	5.07147	0.0517422	NA	4.76855	0.0900428	NA	4.58734	0.103159	NA
YGR101W	PCP1	5.99719	0.0606817	NA	6.11917	0.190536	0.086	5.99011	0.243834	0.151	5.92266	0.299078	0.22
YGR104C	SRB5	4.66093	0.169717	0.022	4.50512	0.259159	0.097	4.2005	0.321346	0.169	3.94493	0.328285	0.177
YGR106C	VOA1	7.57027	0.00459685	NA	7.6167	0.0240778	0.011	7.65975	0.0702595	0.05	7.67021	0.127396	0.102
YGR110W	CLD1	3.33777	0.053577	NA	3.17746	0.268059	0.069	2.73477	0.169916	NA	2.49516	0.464037	0.247
YGR112W	SHY1	4.70079	0.0895604	NA	4.46386	0.0446678	NA	4.19155	0.0267262	NA	4.12966	0.0765285	NA
YGR113W	DAM1	5.23922	0.0928308	NA	5.04655	0.131502	0.036	5.0206	0.101883	0.011	5.18	0.148152	0.074
YGR116W	SPT6	8.81646	0.0287777	NA	8.8165	0.101091	0.039	8.76679	0.201897	0.145	8.58229	0.292267	0.245
YGR118W	RPS23A	10.2221	0.00902587	NA	10.2806	0.123002	0.08	10.4335	0.375541	0.304	10.382	0.604682	0.545
YGR124W	ASN2	9.52863	0.0209654	NA	9.58936	0.0496946	0.003	9.74186	0.121507	0.07	9.71046	0.315411	0.262
YGR125W		6.98188	0.00199698	NA	6.83779	0.0155774	0.003	6.51624	0.0385857	0.02	6.30535	0.0439224	0.021
YGR128C	UTP8	9.0749	0.0120952	NA	9.04562	0.0423459	0.02	8.93083	0.0966772	0.067	8.7926	0.131219	0.101
YGR129W	SYF2	3.38159	0.0976205	NA	2.84498	-0.00886665	NA	2.2599	-0.0562918	NA	1.72845	-0.265595	-0.016
YGR130C		7.5374	-6.70707e-05	NA	7.33797	0.00293723	NA	7.21698	0.0124829	0.004	7.36771	0.0144259	0.006
YGR132C	PHB1	7.16362	0.0259265	NA	7.20864	0.0783051	0.024	7.08452	0.123819	0.074	7.34203	0.176644	0.137
YGR133W	PEX4	4.22321	0.105634	NA	4.18672	0.177009	0.039	4.0264	0.136805	0.009	3.75187	0.224288	0.085
YGR134W	CAF130	5.14082	0.0177407	NA	4.9851	0.0995903	0.02	4.63326	0.0907059	0.002	4.54119	0.13861	0.063
YGR141W	VPS62	5.12466	-0.0276953	NA	4.80342	0.0128622	NA	4.30402	0.0336787	NA	3.7941	0.125597	NA
YGR145W	ENP2	4.98324	0.0799428	NA	5.05498	0.157464	0.045	5.02374	0.48132	0.356	5.32215	0.618495	0.524
YGR146C	ECL1	5.40021	-0.00912331	NA	5.35643	0.0612942	0.022	5.50775	0.196863	0.139	6.11279	0.338929	0.281
YGR148C	RPL24B	9.82372	0.0233076	NA	9.8666	0.0401625	NA	9.94377	-0.00196666	NA	9.87539	0.0663893	0.017
YGR149W		4.80923	0.00227163	NA	4.67454	0.102997	NA	4.29788	0.0978303	NA	4.02949	0.157398	0.033
YGR150C	NA	NA	NA	NA	6.09129	0.0137299	0.003	5.99927	0.0584653	0.036	5.9702	0.119089	0.085
YGR154C	GTO1	3.78652	0.0388005	NA	3.4265	0.102514	NA	3.25698	0.0631246	NA	2.90982	0.00425778	NA
YGR155W	CYS4	9.30493	0.00299162	NA	9.29905	0.0110893	NA	9.39971	0.0111985	NA	9.5047	0.010976	NA
YGR159C	NSR1	7.9267	0.000261514	NA	7.98934	0.00533056	0.001	8.02485	0.0245291	0.017	7.94835	0.0703487	0.056
YGR161C	RTS3	4.42156	0.0546312	NA	4.37096	0.167399	0.068	4.45649	0.224418	0.142	5.14007	0.226561	0.159
YGR161C-C/YGR161C-D		9.11616	0.00268615	NA	9.09732	0.00359718	NA	9.25907	0.00295183	NA	9.38158	0.000161662	NA
YGR161W-A/YGR161W-B		5.47918	0.0336931	NA	5.4858	0.0113565	NA	5.49093	0.0413898	NA	5.59544	0.0474579	NA
YGR161W-C		4.75524	-0.0206248	NA	4.46387	-0.00717994	NA	4.05577	0.0329506	NA	3.74061	0.00904597	NA
YGR162W	TIF4631	5.05065	-0.000564805	NA	4.81703	0.0338082	NA	4.70731	0.0410701	NA	4.62964	0.151135	0.079
YGR171C	MSM1	4.40254	-0.000791117	NA	4.35148	0.0544512	NA	4.05386	-0.00197671	NA	4.06757	0.040036	NA
YGR173W	RBG2	7.10709	0.0258616	NA	7.01084	0.096726	0.022	6.71468	0.257641	0.178	6.52691	0.341429	0.277
YGR177C	ATF2	4.00008	-0.0052393	NA	3.92161	0.0270083	NA	3.98648	-0.0081375	NA	4.21222	0.0113738	NA
YGR178C	PBP1	7.69531	0.0446176	NA	7.72327	0.0220835	NA	7.70543	0.0418407	NA	7.85359	0.103101	0.066
YGR180C	NA	NA	NA	NA	NA	NA	NA	9.20523	0.00487981	0.002	9.33015	0.0162098	0.012
YGR181W	TIM13	6.6035	0.0214286	NA	6.68451	0.0302469	NA	6.7347	0.0407633	NA	6.77505	0.0584189	0.024
YGR185C	TYS1	9.14756	0.000744367	NA	9.18714	0.000178402	NA	9.19781	0.000599558	NA	9.06285	0.00375363	0.001
YGR186W	TFG1	5.6762	0.00111107	NA	5.49015	0.0666017	NA	5.29784	0.319417	0.217	5.4382	0.461304	0.369
YGR187C	HGH1	6.40657	0.148357	0.046	6.37599	0.259844	0.154	6.38761	0.465701	0.372	6.34767	0.612472	0.538
YGR191W	HIP1	7.31528	0.0264331	NA	7.18146	0.0610992	NA	6.732	0.0286949	NA	6.45067	0.0489625	NA
YGR192C	TDH3	13.7937	0.000218776	NA	13.8289	0.000580929	0	13.916	0.00118158	0	13.9906	0.00281294	0.002
YGR193C	PDX1	6.09222	0.0487532	NA	6.01972	0.0680669	0.006	5.92911	0.328179	0.245	5.96953	0.485534	0.412
YGR194C	XKS1	5.53667	-0.0264043	NA	5.42751	0.026093	NA	5.16334	0.12469	0.048	5.15126	0.233058	0.148
YGR198W	YPP1	5.58086	0.0030735	NA	5.50245	0.107348	0.045	5.27702	0.280483	0.192	5.16833	0.338451	0.251
YGR199W	PMT6	6.1102	0.0107892	NA	6.0074	0.0582576	NA	5.51373	0.14351	0.049	5.09864	0.215717	0.105
YGR200C	ELP2	7.99149	0.00531343	NA	7.94315	0.0156636	NA	7.46158	0.0237488	0.006	7.19652	0.0383581	0.017
YGR201C		5.94462	0.00965735	NA	6.05929	0.0124145	NA	6.50373	0.0494864	0.03	6.84625	0.0715982	0.052
YGR205W	TDA10	5.39017	0.0715092	NA	5.46306	0.0755312	NA	5.34426	0.175699	0.081	5.53259	0.23894	0.156
YGR210C		6.8426	-0.00571961	NA	6.77594	0.0282278	NA	6.6256	0.157615	0.106	6.28397	0.321544	0.254
YGR211W	NA	NA	NA	NA	8.09958	0.00424609	0.001	7.91059	0.0221611	0.015	8.09325	0.0460776	0.035
YGR214W	RPS0A	10.5981	0.000906841	NA	10.6531	0.00934409	0.006	10.6489	0.0390555	0.031	10.6362	0.0771981	0.065
YGR216C	GPI1	5.30537	0.0018429	NA	5.15357	0.0588287	0.017	4.78039	0.102954	0.05	4.74412	0.168392	0.1
YGR220C	MRPL9	6.57225	0.0120562	NA	6.4856	0.0225424	NA	6.08382	0.0396638	0.01	5.83584	0.0687767	0.029
YGR227W	DIE2	5.35446	0.0838087	NA	5.23491	0.336666	0.189	5.16975	0.541764	0.418	5.15844	0.629083	0.53
YGR229C	SMI1	4.91756	-0.00656457	NA	5.00699	0.0530555	0.017	5.16844	0.279184	0.206	5.30073	0.494223	0.42
YGR231C	PHB2	7.48396	0.0308504	NA	7.40748	0.0539325	0.012	7.37388	0.0624062	0.023	7.51061	0.092082	0.059
YGR232W	NAS6	6.53977	-0.000757643	NA	6.53424	0.00573035	NA	6.58645	0.0276036	0.015	6.36148	0.0719871	0.048
YGR234W	YHB1	9.54011	0.00851549	0.002	9.59063	0.00792106	0.002	9.63796	0.00848996	0.003	9.62424	0.00917305	0.004
YGR235C	MIC26	5.97209	0.0163468	NA	5.82239	0.053863	0.016	5.33707	0.219298	0.143	5.08877	0.24125	0.158
YGR243W	MPC3	4.28624	0.128006	NA	4.2657	0.185895	0.047	4.25164	0.0879479	NA	4.23098	0.136709	0.017
YGR244C	LSC2	6.59962	-0.00624327	NA	6.61658	0.0470605	0.024	6.75438	0.342325	0.271	6.87735	0.57662	0.508
YGR245C	SDA1	7.39672	0.0536709	NA	7.27372	0.0728106	0.012	7.01752	0.210922	0.143	6.60939	0.333691	0.262
YGR247W	CPD1	3.23244	-0.000583183	NA	3.51884	0.071261	NA	3.30757	0.175575	0.019	3.03038	0.340576	0.175
YGR253C	PUP2	8.02225	-0.00220729	NA	7.90165	0.00803965	NA	7.66076	-0.00247323	NA	7.36172	0.021115	0.002
YGR254W	ENO1	10.1699	0.000498125	NA	10.1729	0.00070164	NA	10.0949	0.0146051	0.01	10.1932	0.0548729	0.046
YGR255C	COQ6	6.50863	-0.0409664	NA	6.35473	0.000608477	NA	6.21002	0.109911	0.039	5.84313	0.256974	0.171
YGR260W	NA	NA	NA	NA	NA	NA	NA	6.50405	0.0251231	0.014	6.70264	0.0530246	0.037
YGR262C	BUD32	5.72635	-0.00102319	NA	5.78952	0.0375525	0.013	5.86981	0.158224	0.113	6.04556	0.238598	0.192
YGR264C	MES1	8.0124	0.0211366	NA	7.99822	0.0563648	NA	8.10201	0.13196	0.066	8.14022	0.252626	0.199
YGR266W		5.76443	-0.0260151	NA	5.63777	-0.0136276	NA	5.15935	-0.0208906	NA	4.80812	-0.0302422	NA
YGR267C	FOL2	8.3031	0.00917809	NA	8.23347	0.00948144	NA	7.88918	0.0139344	NA	7.32817	0.0419026	0.017
YGR268C	HUA1	4.173	-0.0277638	NA	3.98819	-0.0508701	NA	3.28873	0.180838	0.017	2.94382	0.0103467	NA
YGR271C-A	EFG1	5.54666	0.00603504	NA	5.47243	0.0318103	0.007	5.46603	0.167629	0.12	5.35235	0.285673	0.225
YGR275W	RTT102	5.98481	-0.0132422	NA	5.88677	0.0668984	0.01	5.82124	0.242342	0.16	5.69934	0.300451	0.221
YGR278W	CWC22	6.15827	0.0214911	NA	5.96237	0.0310408	NA	5.90714	0.0475401	NA	5.98336	0.0337241	NA
YGR279C	SCW4	9.6258	-0.0152863	NA	9.63709	0.00998477	NA	9.68369	0.00590509	NA	9.67203	-0.0325989	-0.004
YGR280C	PXR1	6.18131	0.0174141	NA	5.99915	0.065738	0.026	5.86111	0.111424	0.068	5.74182	0.126675	0.08
YGR281W	YOR1	6.3734	0.0214931	NA	6.2481	0.0239829	NA	5.88944	0.0138496	NA	5.80297	0.0452703	NA
YGR282C	BGL2	9.93934	-0.00591842	NA	9.96094	0.0396576	NA	10.0158	0.0770693	0.032	9.94253	0.157407	0.117
YGR283C	NA	NA	NA	NA	5.08633	0.0365985	0.01	4.87729	0.10557	0.061	5.04287	0.169742	0.115
YGR294W	NA	NA	NA	NA	NA	NA	NA	2.1875	0.13746	NA	2.53097	0.422049	0.262
YGR295C	COS6	6.62578	-0.00387432	NA	6.57141	0.0112883	NA	6.48776	0.0598772	0.035	5.9586	0.177084	0.126
YHL001W	RPL14B	9.04548	0.00300192	NA	9.06063	0.0179272	0.007	8.93995	0.0628051	0.046	8.7027	0.0720251	0.055
YHL003C	LAG1	7.10753	0.011617	NA	7.09419	0.0374506	NA	7.07166	0.0154838	NA	7.00798	0.0110407	NA
YHL004W	MRP4	6.211	0.00546836	NA	6.09969	0.0257664	0.007	5.99667	0.0721043	0.044	6.06398	0.142727	0.103
YHL008C		4.74909	0.10572	NA	4.74748	0.273635	0.131	4.91581	0.411014	0.288	4.98399	0.482387	0.379
YHL010C	ETP1	3.98523	0.0749759	NA	3.77456	0.0346876	NA	3.27583	0.163673	NA	3.32351	0.146331	NA
YHL011C	PRS3	7.44699	-0.00253184	NA	7.3447	0.00301763	NA	6.89942	-0.0386349	NA	6.39906	-0.027483	NA
YHL014C	YLF2	3.5531	-0.114315	NA	3.32327	0.0426198	NA	2.93077	-0.0330061	NA	3.01827	0.064616	NA
YHL017W		6.69463	0.025913	NA	6.6593	0.0975302	0.02	6.45008	0.161812	0.082	6.3808	0.129497	0.062
YHL021C	NA	NA	NA	NA	NA	NA	NA	5.4933	0.0934632	0.059	5.60026	0.134105	0.095
YHL023C	NA	NA	NA	NA	NA	NA	NA	4.84797	0.0680634	0.035	4.86418	0.139269	0.09
YHL027W	RIM101	6.54667	0.0135417	NA	6.3386	0.0192982	NA	5.84966	0.0280233	NA	5.63684	0.0356718	NA
YHL029C	OCA5	5.81263	0.0563683	NA	5.70135	0.13224	0.061	5.45203	0.218906	0.14	5.49116	0.193972	0.125
YHL030W	ECM29	6.97534	0.00049583	NA	6.84751	0.0171617	0.006	6.6458	0.063771	0.042	6.75534	0.163192	0.129
YHL033C	RPL8A	10.2549	-0.00360121	NA	10.1809	-0.0654689	NA	10.058	-0.15697	-0.086	9.58925	-0.256762	-0.197
YHL034C	SBP1	8.07381	-0.00538528	NA	8.0079	0.00286946	NA	8.18993	0.0497302	0.036	8.50227	0.208518	0.179
YHL035C	VMR1	4.78981	0.0916045	NA	4.69002	0.163777	0.044	4.44641	0.201187	0.087	4.44763	0.22925	0.125
YHL038C	CBP2	4.66682	0.0128429	NA	4.58957	0.0773677	0.031	4.57718	0.13539	0.083	4.3892	0.244272	0.169
YHL047C	ARN2	3.57483	0.0885012	NA	3.4737	0.0641998	NA	3.12559	0.16421	NA	3.17104	0.18281	0.022
YHL048W	COS8	5.94627	0.0301084	NA	5.86676	0.0375264	NA	5.50413	0.0786802	0.007	4.9316	0.274783	0.16
YHR001W	OSH7	5.61035	0.0490488	NA	5.46814	0.151032	0.045	5.24491	0.36239	0.246	5.07742	0.423617	0.32
YHR001W-A	QCR10	6.02704	0.00946197	NA	5.89311	-0.00239435	NA	5.56529	-0.0225189	NA	5.39456	-0.0313163	NA
YHR003C	TCD1	5.72972	0.000781982	NA	5.52553	0.0660282	NA	5.12809	0.112055	0.016	4.76618	0.168753	0.063
YHR005C-A	TIM10	8.23401	0.00784632	NA	8.15088	0.0239603	0.005	8.05268	0.0689723	0.043	7.70387	0.15112	0.116
YHR007C	ERG11	9.38622	-0.0282368	NA	9.43399	-0.0238251	NA	9.53326	-0.1137	-0.045	9.5914	-0.0939041	-0.04
YHR010W	RPL27A	9.79717	1.68652e-05	NA	9.87554	2.35399e-05	NA	9.99073	0.00604629	0.004	9.99007	0.023824	0.019
YHR011W	DIA4	4.33878	0.0647275	NA	4.05913	0.384307	0.192	3.69442	0.441993	0.269	3.60294	0.431235	0.267
YHR012W	VPS29	7.44603	0.0321288	NA	7.46004	0.0674142	0.02	7.3655	0.113121	0.069	7.1958	0.180064	0.145
YHR013C	ARD1	7.00851	0.0106384	NA	6.9857	0.0434186	0.019	6.81995	0.161962	0.118	6.44236	0.282421	0.225
YHR015W	MIP6	2.6311	0.0377999	NA	2.45826	-0.0111962	NA	1.8794	-0.0790248	NA	1.86751	-0.144127	NA
YHR016C	YSC84	7.00039	0.0273091	NA	6.88326	0.0825056	0.03	6.63634	0.342781	0.266	6.39843	0.571841	0.497
YHR018C	ARG4	9.68726	0.00137957	NA	9.61866	0.00141123	NA	9.27931	0.00731671	0.004	9.17058	0.00504878	0.002
YHR021C	RPS27B	10.6534	0.00069637	NA	10.766	0.00195005	0	10.9287	0.00715257	0.005	10.94	0.0182022	0.015
YHR023W	MYO1	6.14358	0.0428579	NA	5.94875	0.0602388	0.009	5.49376	0.0782183	0.02	5.40496	0.101679	0.04
YHR024C	MAS2	5.95572	0.049367	NA	5.89321	0.0745847	NA	5.74204	0.0987186	0.019	5.71007	0.243526	0.163
YHR026W	VMA16	8.14437	-0.0135956	NA	8.23266	0.0470865	NA	8.30838	0.148806	0.077	8.4567	0.275926	0.214
YHR028C	DAP2	7.15318	0.0038504	NA	7.21139	0.00627279	NA	7.30546	0.0228818	0.014	7.31922	0.0675228	0.052
YHR029C	YHI9	6.14519	0.000701861	NA	6.19839	0.00763486	NA	6.34285	0.0255859	0.01	6.29807	0.0529952	0.032
YHR030C	SLT2	6.72468	0.041182	NA	6.64301	0.127083	0.044	6.25308	0.22137	0.138	6.09072	0.30559	0.225
YHR031C	RRM3	4.78937	0.0775373	NA	4.74548	0.209187	0.075	4.31273	0.476132	0.327	4.19089	0.434117	0.292
YHR033W		4.89697	-0.040328	NA	4.98065	0.164087	0.052	4.81838	0.177963	0.076	4.72503	0.290578	0.183
YHR034C	PIH1	3.46284	0.034182	NA	3.45522	0.011995	NA	3.40666	0.0818346	NA	3.14528	0.0318484	NA
YHR037W	PUT2	6.10807	0.0475425	NA	6.04108	0.0637604	0.003	6.02631	0.016413	NA	6.17732	0.0522209	NA
YHR039C	MSC7	6.57336	0.00800461	NA	6.61702	-0.00530195	NA	6.65348	0.0283047	NA	6.73774	0.0398528	0.002
YHR039C-A	VMA10	7.11249	0.00395877	NA	7.08602	0.0110663	0.001	7.21235	0.0979189	0.074	7.25063	0.287336	0.244
YHR042W	NCP1	7.92673	0.0358325	NA	7.89858	0.0721631	0	7.93633	0.120033	0.05	7.64114	0.159495	0.099
YHR045W		4.37936	0.0432179	NA	4.33261	-0.0237388	NA	3.8854	0.0817695	NA	3.827	0.0927052	NA
YHR046C	INM1	5.86925	-0.00357578	NA	5.86921	0.0236751	NA	5.69098	0.0736244	NA	5.60471	0.0755777	NA
YHR047C	AAP1	6.78108	0.0246619	NA	6.75947	0.127617	0.067	6.68861	0.307827	0.232	6.53966	0.528247	0.456
YHR049W	FSH1	8.21635	-0.000554095	NA	8.20887	0.00415859	NA	8.23284	0.0260004	0.018	8.14222	0.107155	0.089
YHR051W	COX6	6.07447	0.0174178	NA	6.07442	0.0468373	NA	5.68715	0.0233142	NA	5.22971	0.0712191	NA
YHR052W	CIC1	7.02296	-0.000195669	NA	7.07985	0.0412665	0.023	6.99837	0.275189	0.219	7.23383	0.453944	0.394
YHR061C	GIC1	3.7193	-0.103712	NA	3.6424	-0.138173	NA	3.34428	-0.257105	-0.092	3.43183	-0.131157	NA
YHR062C	RPP1	5.77165	0.00194293	NA	5.58379	0.0392308	0.013	5.46287	0.135911	0.089	5.66709	0.221341	0.169
YHR064C	SSZ1	9.49506	-0.000659735	NA	9.50389	0.0021805	NA	9.59479	0.0143931	0.01	9.63648	0.0343375	0.027
YHR065C	RRP3	4.5155	0.00794531	NA	4.5461	0.0682732	0.02	4.53745	0.327807	0.234	4.48702	0.526015	0.428
YHR066W	SSF1	7.45314	0.0191423	NA	7.27279	0.0214465	0.004	6.81212	0.0204852	NA	6.53172	0.0283669	0.01
YHR068W	DYS1	7.90145	0.0257271	NA	7.98891	0.0607668	0.006	8.0665	0.147924	0.085	7.89594	0.254575	0.195
YHR070W	TRM5	4.06397	0.00479981	NA	3.76273	-0.0382816	NA	3.21558	-0.0834122	NA	2.88777	-0.206639	NA
YHR071W	PCL5	7.38257	-0.00209451	NA	7.29324	0.00216768	NA	7.2772	0.00139416	NA	7.02999	0.0143795	NA
YHR072W	ERG7	7.20451	0.00894567	NA	7.18315	0.0089232	NA	7.07818	-0.00429227	NA	7.13833	0.006765	NA
YHR073W/YHR073W-A	OSH3	6.38172	0.0247922	NA	6.28829	0.0276007	NA	6.08256	0.0273048	NA	5.97595	0.0365202	NA
YHR077C	NMD2	5.99385	0.045108	NA	5.71243	0.0806226	NA	5.21207	0.0752271	NA	4.99259	0.136186	0.038
YHR078W		7.40623	0.000826875	NA	7.29733	-0.000524561	NA	6.88253	0.00524977	NA	6.51059	0.0153685	NA
YHR079C	IRE1	6.59684	-0.00217491	NA	6.52923	0.0165946	NA	6.4614	0.011624	NA	6.42157	0.0103597	NA
YHR080C		4.87302	-0.00333858	NA	4.71608	0.0819226	0.027	4.77459	0.265158	0.18	4.88557	0.527813	0.439
YHR081W	LRP1	6.52576	0.0152847	NA	6.53486	0.116879	0.037	6.65743	0.230945	0.147	6.73064	0.338932	0.266
YHR082C	KSP1	6.18323	0.0220347	NA	6.08711	0.163082	0.085	6.02408	0.351303	0.263	6.21019	0.533327	0.453
YHR083W	SAM35	8.0907	0.0185848	NA	8.04605	0.036928	0.009	7.88062	0.0816298	0.047	7.47197	0.180594	0.136
YHR084W	STE12	5.76079	0.0275053	NA	5.80804	0.0402087	NA	5.78607	-0.00862856	NA	5.82432	-0.0354457	NA
YHR085W	IPI1	5.63613	0.0237123	NA	5.43423	0.0414625	NA	5.12331	0.077914	NA	5.17508	0.00836128	NA
YHR086W	NAM8	3.45757	0.0864835	NA	3.28517	0.0568439	NA	2.65315	0.0434413	NA	2.54758	-0.178415	NA
YHR088W	RPF1	6.51666	0.0383818	NA	6.46195	0.224457	0.129	6.32249	0.475886	0.381	6.31812	0.569747	0.496
YHR089C	GAR1	9.00624	-0.0262105	NA	9.08422	-0.0416739	NA	9.30021	-0.115674	-0.057	9.08966	-0.0362699	NA
YHR092C	HXT4	3.87025	-0.00842604	NA	4.08291	0.108284	NA	4.91783	0.239913	0.115	5.03679	0.226216	0.121
YHR094C	HXT1	8.43293	0.00739067	0.001	8.35402	0.0267197	0.017	8.10391	0.0452522	0.032	7.78744	0.055985	0.039
YHR099W	TRA1	5.70493	0.00137957	NA	5.63604	0.0193408	0.001	5.43392	0.108547	0.067	5.1463	0.259278	0.184
YHR100C	GEP4	5.19035	0.00301461	NA	5.13481	0.00284866	NA	4.93708	0.0219124	NA	4.54969	-0.0133027	NA
YHR106W	NA	NA	NA	NA	5.05098	0.0154875	NA	4.95438	0.140548	0.086	4.96917	0.271658	0.203
YHR108W	GGA2	9.43101	0.00335176	NA	9.36021	0.00554016	NA	9.1308	0.00222716	NA	8.8861	0.00587622	NA
YHR112C		5.50153	-0.00600207	NA	5.44041	0.00221158	NA	5.07693	-0.0118213	NA	4.62539	-0.0120385	NA
YHR113W	APE4	6.38007	0.0079377	NA	6.39635	0.0320363	NA	6.32543	0.184862	0.123	6.31666	0.303172	0.238
YHR117W	TOM71	6.10177	0.0488105	NA	6.04767	0.00554875	NA	5.93807	0.0631236	0.008	5.5497	0.100599	0.038
YHR122W	CIA2	5.35364	0.0533204	NA	5.30805	0.12548	0.033	4.9503	0.166117	0.069	4.60071	0.208141	0.102
YHR127W		5.41158	-0.0178824	NA	5.16768	0.0427887	NA	4.8394	0.0870164	NA	4.66868	0.127838	0.031
YHR128W	FUR1	7.13225	0.0164558	NA	7.07696	-0.00772535	NA	6.71272	-0.0713407	-0.012	6.27453	-0.075552	-0.015
YHR132W-A	IGO2	4.77988	0.0296654	NA	4.85851	0.0667644	NA	4.74536	0.280243	0.172	4.54101	0.369778	0.26
YHR133C	NSG1	6.96867	0.010059	NA	7.19648	0.034044	0.014	7.39958	0.0490965	0.03	7.44043	0.0559247	0.04
YHR141C	RPL42B	8.86748	-0.000160571	NA	8.87704	0.0108505	0.005	8.96928	0.0605954	0.048	8.89333	0.0963724	0.08
YHR142W	CHS7	7.15861	0.00945155	NA	7.1434	0.0254036	0.008	6.78362	0.0747059	0.047	6.39408	0.13405	0.09
YHR143W	DSE2	7.92073	0.026083	NA	7.93337	0.0408862	NA	7.97626	0.0786253	0.04	7.90053	0.08992	0.057
YHR143W-A	RPC10	7.59023	0.00657125	NA	7.68279	0.0309725	0.003	7.6976	0.0676667	0.036	7.62277	0.156951	0.118
YHR144C	DCD1	4.7277	0.0219961	NA	4.64733	0.133672	0.038	4.57709	0.42223	0.292	4.60828	0.535752	0.42
YHR147C	MRPL6	5.43718	0.00742716	NA	5.24553	0.0155272	NA	4.83457	0.114474	0.058	4.70835	0.184787	0.109
YHR150W	PEX28	4.13156	-0.0435099	NA	3.91837	0.0652101	NA	3.81077	0.2244	0.086	4.1357	0.248651	0.129
YHR151C	MTC6	4.00518	0.0415683	NA	4.02403	0.0668687	0.011	3.86784	0.20562	0.115	4.08214	0.267807	0.176
YHR155W	YSP1	4.74013	0.00210139	NA	4.73178	0.0285325	NA	4.74541	0.107784	0.047	4.87258	0.336628	0.252
YHR163W	SOL3	7.8089	-0.000638659	NA	7.79757	0.00457407	0	7.82312	0.0105252	0.005	7.68625	0.0206199	0.012
YHR164C	DNA2	5.60853	0.00587829	NA	5.51295	0.0754046	0.021	5.21093	0.16897	0.096	5.11513	0.334868	0.244
YHR167W	THP2	5.71596	0.039578	NA	5.54402	0.110098	0.042	5.0674	0.177398	0.094	4.87493	0.170899	0.081
YHR169W	DBP8	5.22718	0.0714164	NA	5.18037	0.128948	0.04	4.75163	0.38731	0.259	4.56031	0.398296	0.276
YHR175W-A		1.23501	0.00714311	NA	2.46069	0.0558552	NA	3.97946	0.0522779	NA	4.93872	0.0821656	NA
YHR176W	FMO1	3.45337	-0.0290548	NA	3.31205	0.0562765	NA	3.35689	0.0764878	NA	4.15633	-0.0118728	NA
YHR178W	STB5	4.17885	0.0452565	NA	4.04288	0.134364	0.012	3.84142	0.164952	0.042	3.79781	0.0152626	NA
YHR182W		5.58306	0.00971862	NA	5.43775	0.0285721	NA	5.10572	0.136348	0.077	4.62072	0.204509	0.114
YHR191C	CTF8	6.45665	0.0217997	NA	6.27338	0.124932	0.04	5.62222	0.205423	0.106	5.2317	0.167224	0.061
YHR192W	LNP1	5.38013	-0.00798828	NA	5.26391	0.0393796	NA	4.90493	0.176992	0.097	4.91922	0.348055	0.253
YHR193C	NA	NA	NA	NA	9.45051	0.000762838	NA	9.50675	0.00548273	0.003	9.51542	0.0233945	0.018
YHR196W	UTP9	6.57282	0.0104874	NA	6.45582	0.0384056	0.009	6.18465	0.148866	0.098	6.06396	0.218471	0.162
YHR200W	RPN10	6.9713	0.012732	NA	6.90782	0.0274259	0.011	6.57012	0.0665458	0.042	6.14621	0.107509	0.068
YHR201C	PPX1	7.74087	-0.00652849	NA	7.6838	-0.00622162	NA	7.36434	-0.00427565	NA	7.0988	-0.013076	NA
YHR202W		3.28067	-0.0331656	NA	3.13389	-0.025767	NA	3.05564	0.181817	0.039	2.98954	0.201979	0.064
YHR203C	RPS4B	9.59228	0.0219722	NA	9.64356	0.0260234	NA	9.78372	0.00752051	NA	9.77343	0.00588	NA
YHR205W	SCH9	4.83716	0.0452262	NA	4.70154	0.144296	0.027	4.76882	0.190323	0.079	4.99659	0.1723	0.081
YHR208W	BAT1	9.58735	0.0120026	NA	9.63676	0.0211482	NA	9.45026	-0.0389661	NA	9.05083	-0.0273843	NA
YHR209W	CRG1	3.4788	-0.0152691	NA	3.85428	0.0422865	NA	4.72633	0.128863	0.063	5.17117	0.124858	0.068
YHR210C		2.65692	-0.0691782	NA	2.22841	-0.138925	NA	2.11307	0.0927502	NA	1.43333	-0.210816	NA
YHR214C-B/YHR214C-C		9.46613	0.0820787	0.021	9.45914	0.113888	0.049	9.63572	0.144106	0.084	9.78888	0.202467	0.155
YHR216W	IMD2	6.79007	0.0225858	NA	6.84183	0.0364	NA	7.03224	0.129711	0.088	7.43824	0.228082	0.189
YIL001W		3.5573	0.0143911	NA	3.38222	0.053814	NA	2.54816	0.0757059	NA	2.70077	0.0672303	NA
YIL002C	INP51	5.19953	0.00732045	NA	5.24786	0.0486827	NA	5.14027	0.106997	0.021	5.15443	0.252617	0.16
YIL004C	BET1	6.81554	0.0291146	NA	6.71247	0.0588913	NA	6.26871	0.0591731	NA	5.89489	0.10927	0.028
YIL005W	EPS1	6.48359	0.00796066	NA	6.41446	0.0502697	NA	6.26234	0.0870666	0.024	6.04856	0.128093	0.068
YIL007C	NAS2	3.58966	0.071087	NA	3.60614	0.0704654	NA	3.27916	0.0541452	NA	3.21312	0.0604202	NA
YIL008W	URM1	8.2802	0.000947634	NA	8.23169	0.00228398	NA	8.07239	0.00448639	0	7.91992	0.0104681	0.004
YIL009C-A	EST3	6.30368	0.0447757	NA	6.10695	0.0430128	NA	5.60636	0.0644862	NA	5.25715	0.13883	0.047
YIL010W	DOT5	6.62391	-0.000886494	NA	6.63939	0.00901354	NA	6.56765	0.0368982	NA	6.28324	0.0552084	NA
YIL014C-A		3.52755	0.0132799	NA	3.5986	-0.0371246	NA	3.54033	0.00106773	NA	3.29437	0.0496039	NA
YIL014W	MNT3	6.71449	-0.00579367	NA	6.55795	-0.00489224	NA	6.05776	0.00611756	NA	5.81431	-0.00887236	NA
YIL017C	VID28	4.96834	0.0207756	NA	4.94857	0.210426	0.081	4.63818	0.377124	0.245	4.82878	0.48557	0.38
YIL018W	RPL2B	9.88717	0.00348004	NA	9.99151	0.00530927	0.001	10.1256	0.0108425	0.006	10.16	0.0189979	0.013
YIL021W	RPB3	5.83213	0.0035619	NA	5.75877	0.00954642	NA	5.34438	0.0441975	0.011	4.98963	0.0669713	0.021
YIL035C	CKA1	7.17513	0.108737	0.023	7.14617	0.176913	0.085	6.96387	0.255202	0.173	6.84432	0.310557	0.24
YIL036W	CST6	5.34505	0.100293	NA	5.30399	0.31211	0.171	5.15361	0.616939	0.494	5.176	0.737495	0.641
YIL038C	NOT3	5.84294	0.0178987	NA	5.86916	0.150911	0.089	6.01574	0.427114	0.342	6.17909	0.581279	0.509
YIL039W	TED1	6.50008	0.0172879	NA	6.46941	0.0541725	0.019	6.60533	0.161985	0.113	6.42344	0.328414	0.267
YIL041W	GVP36	7.63364	0.00985025	NA	7.66094	0.0162776	NA	7.75368	0.0106303	NA	7.64838	0.0425343	0.01
YIL048W	NEO1	4.75377	0.00965681	NA	4.68367	0.0444938	NA	4.16883	0.103478	0.027	4.25601	0.0921601	0.016
YIL051C	MMF1	10.0327	0.00010198	NA	10.01	0.000924316	NA	9.96441	0.00449562	0.001	9.68828	0.0179075	0.013
YIL052C	RPL34B	10.6754	0.0998742	0.027	10.6947	0.0944052	0.026	10.7641	0.117843	0.052	10.6973	0.153398	0.101
YIL053W	GPP1	10.62	0.0133907	NA	10.6334	0.0163079	0.002	10.5055	0.00976663	NA	10.356	0.0383388	0.026
YIL056W	VHR1	6.28073	-0.0293473	NA	6.20899	0.0417883	NA	6.29806	0.0112139	NA	6.50673	-0.00107279	NA
YIL062C	ARC15	7.69281	0.0345575	NA	7.65265	0.0695229	0.006	7.41613	0.0485133	NA	7.09209	0.132298	0.072
YIL064W	EFM4	6.49094	0.00825154	NA	6.33583	0.020713	NA	6.1225	0.0542878	NA	5.47371	0.0253531	NA
YIL068C	SEC6	5.49323	0.120462	0.013	5.33512	0.22199	0.097	5.02576	0.292506	0.172	4.89581	0.362197	0.24
YIL071C	PCI8	3.5015	0.0487463	NA	3.20659	0.0841924	NA	2.81184	0.000212017	NA	2.5055	-0.109084	NA
YIL075C	RPN2	8.76895	0.00428423	NA	8.6985	0.0443826	0.024	8.62147	0.170937	0.13	8.78115	0.313246	0.265
YIL076W	SEC28	8.33014	0.00380248	NA	8.28743	0.0259311	0.007	8.13106	0.0727344	0.047	7.8164	0.154876	0.12
YIL077C		4.44026	0.0109262	NA	4.24582	0.258871	0.117	4.0935	0.392105	0.257	4.10419	0.587945	0.461
YIL078W	THS1	9.22053	-0.000536371	NA	9.21264	0.00253119	0	9.34626	0.0277031	0.021	9.58318	0.0668016	0.055
YIL083C	CAB2	5.70831	0.0290357	NA	5.70966	0.0939059	0.025	5.44863	0.0695209	0	5.2653	0.0259602	NA
YIL090W	ICE2	6.43827	0.0282595	NA	6.49967	0.0448298	0.017	6.74556	0.0917081	0.06	6.993	0.143861	0.111
YIL094C	LYS12	10.2319	0.0184481	NA	10.1941	0.0408366	NA	10.0216	0.124185	0.061	9.57572	0.169063	0.114
YIL096C	BMT5	5.86753	0.00124761	NA	5.87358	0.0807807	NA	5.51535	0.222311	0.124	5.23392	0.354988	0.25
YIL097W	FYV10	4.52887	-0.00322172	NA	4.22877	0.130002	0.014	3.96384	0.0797366	NA	3.91703	0.104567	NA
YIL104C	SHQ1	4.73046	-0.00384964	NA	4.56734	0.0937078	0.028	4.43116	0.252101	0.154	4.22929	0.354536	0.239
YIL105C	SLM1	5.87246	0.0919773	NA	5.69022	0.121088	0.027	5.44869	0.171427	0.076	5.34064	0.068331	NA
YIL107C	PFK26	4.60046	0.0187931	NA	4.77244	0.00855515	NA	4.86938	0.046047	NA	5.14111	0.0742861	0.025
YIL108W		5.86138	0.000991661	NA	5.77086	0.0306664	0.002	5.76267	0.183343	0.13	5.76902	0.357745	0.291
YIL109C	SEC24	5.85331	-0.0182388	NA	5.8705	0.0472592	NA	5.7753	0.0780683	NA	5.53257	0.0864267	0.011
YIL110W	HPM1	5.37493	0.012175	NA	5.31501	0.024533	NA	4.91216	0.0507791	NA	4.95454	0.0302432	NA
YIL111W	COX5B	7.89807	0.0260113	NA	7.78066	0.026976	NA	7.70634	-0.0216582	NA	7.26488	0.0152696	NA
YIL112W	HOS4	4.83564	0.0930547	NA	4.66839	0.191047	0.062	3.99311	0.315342	0.158	3.93226	0.450804	0.308
YIL114C	POR2	5.68289	-0.053019	NA	5.68533	0.0851262	0.013	5.73625	0.187987	0.105	5.7092	0.362096	0.277
YIL115C	NUP159	5.9905	0.0169631	NA	5.86965	0.112845	0.054	5.79016	0.409891	0.317	5.70005	0.64277	0.559
YIL119C	RPI1	5.74238	-0.0075872	NA	5.41155	-0.0393595	NA	4.9182	-0.037494	NA	4.7961	-0.0153312	NA
YIL121W	QDR2	6.63673	0.00462719	NA	6.49326	0.00281113	NA	6.18183	0.0369322	0.013	5.67635	0.0702799	0.032
YIL125W	KGD1	6.03492	0.0062242	NA	6.04638	0.0243536	NA	6.0887	0.0189608	NA	6.27078	0.0545413	0.01
YIL127C	RRT14	6.53018	0.00684305	NA	6.35225	0.0319739	NA	5.82251	0.0644188	0.017	5.30097	0.0976074	0.03
YIL128W	MET18	5.64062	-0.0030153	NA	5.5404	0.0117697	NA	5.2856	0.0977407	0.056	5.19448	0.139547	0.086
YIL129C	TAO3	5.9665	0.022268	NA	5.92016	0.103247	0.05	5.62245	0.246537	0.174	5.22812	0.408597	0.313
YIL135C	VHS2	5.65649	0.00361525	NA	5.64496	0.014284	NA	6.08681	0.0861337	0.06	6.18719	0.105341	0.079
YIL136W	OM45	4.16278	0.0821863	NA	3.92986	0.215661	0.069	3.85896	0.504209	0.342	3.88242	0.630487	0.494
YIL137C	TMA108	5.99593	0.00532526	NA	5.91111	0.040186	0.003	5.7035	0.114154	0.064	5.50608	0.170165	0.109
YIL143C	SSL2	4.77001	0.0107365	NA	4.8796	0.0288157	NA	4.83372	0.0409521	NA	5.14405	0.0272111	NA
YIL144W	NDC80	4.93397	-0.00328504	NA	4.77622	0.0758418	NA	4.85514	0.0937169	0.02	4.85719	0.117899	0.051
YIL146C	ATG32	4.42947	-0.00974759	NA	4.4443	0.0164115	NA	4.51555	0.0390637	NA	4.85689	0.128187	0.043
YIL147C	SLN1	7.31461	0.035422	NA	7.32425	0.0737976	0.027	7.06796	0.118043	0.075	6.87115	0.100302	0.062
YIL148W	RPL40A	10.9197	0.000399383	NA	10.9086	0.00137467	0	10.9903	0.00304976	0.001	10.9167	0.00563916	0.004
YIL154C	IMP2'	5.10722	-0.0218162	NA	4.79926	-0.0254114	NA	4.40676	-0.0102775	NA	3.99427	0.0200582	NA
YIL156W	UBP7	6.39157	0.0314032	NA	6.303	0.162183	0.074	6.04751	0.301648	0.221	6.01031	0.385502	0.316
YIR004W	DJP1	5.38803	-0.00158706	NA	5.32253	0.0454427	NA	5.23821	0.046061	NA	5.17781	0.0499471	NA
YIR005W	IST3	4.70834	-0.0238908	NA	4.48146	-0.00798747	NA	4.6861	0.0409612	NA	4.92203	0.0251314	NA
YIR006C	PAN1	6.38677	-0.0010648	NA	6.30631	0.0427662	0.016	6.09041	0.148468	0.102	5.9944	0.310746	0.247
YIR007W		4.02179	-0.00451905	NA	4.02935	0.0669721	0.002	3.73029	0.179521	0.084	3.37431	0.334331	0.185
YIR008C	PRI1	5.27354	0.0265912	NA	5.16552	0.106271	0.046	4.7984	0.20288	0.116	4.45391	0.275017	0.169
YIR017C	MET28	3.7254	0.0762246	NA	3.53841	0.0660216	NA	3.383	0.195247	0.053	3.55833	0.270863	0.143
YIR023W	DAL81	5.03231	0.0694118	NA	4.94129	0.149044	0.035	4.85573	0.217193	0.105	4.77737	0.293649	0.182
YIR024C	INA22	3.78019	0.103626	NA	3.62627	0.131742	0.004	3.29826	0.23841	0.087	3.29272	0.299049	0.137
YIR026C	YVH1	6.74021	0.0113147	NA	6.68615	0.062844	0.024	6.48701	0.195173	0.136	6.05871	0.326563	0.255
YIR034C	LYS1	10.2589	0.00388085	NA	10.1934	0.0310177	0.021	10.0741	0.134714	0.106	10.1799	0.168142	0.142
YIR036C	IRC24	6.50244	-0.00956057	NA	6.41769	-0.0205487	NA	6.28376	-0.0373598	-0.011	5.75583	-0.0374495	-0.008
YJL001W	PRE3	8.01072	0.0408132	NA	7.94622	0.0735299	0.02	7.72382	0.16105	0.1	7.27181	0.278929	0.216
YJL002C	NA	NA	NA	NA	NA	NA	NA	9.50571	0.00325213	0.001	9.67471	0.00580285	0.004
YJL003W	COX16	4.29053	0.0477472	NA	4.13954	0.0945106	NA	3.87876	0.213052	0.078	3.53589	0.152813	NA
YJL005W	CYR1	7.79714	0.0178961	NA	7.79818	0.136889	0.065	7.76661	0.302092	0.224	7.88321	0.429326	0.364
YJL008C	CCT8	7.52396	0.0743006	0.009	7.56901	0.124706	0.057	7.64742	0.32437	0.248	7.9153	0.535952	0.477
YJL010C	NOP9	6.16402	0.0369389	NA	6.09316	0.173146	0.098	5.82141	0.383014	0.29	5.68005	0.589843	0.505
YJL011C	RPC17	5.27512	-0.00438227	NA	5.14414	0.00377056	NA	4.67116	0.155362	0.067	4.48687	0.161856	0.067
YJL012C	VTC4	7.1293	0.00114634	NA	7.16376	0.00976775	NA	7.11609	0.0578104	0.039	7.03503	0.102137	0.077
YJL013C	MAD3	4.43294	-0.0253047	NA	4.38042	0.0998535	NA	4.24521	0.254264	0.125	4.10819	0.161401	0.049
YJL014W	CCT3	6.51	0.0210269	NA	6.48811	0.176047	0.087	6.48778	0.41697	0.326	6.41149	0.62232	0.549
YJL020C	BBC1	6.29529	0.0084641	NA	6.24962	0.0343525	0.014	6.0942	0.0915323	0.06	5.79642	0.14486	0.1
YJL023C	NA	NA	NA	NA	3.27346	0.103118	0.021	3.28008	0.255672	0.14	3.63193	0.397725	0.286
YJL024C	APS3	7.06345	0.0301424	NA	6.9441	0.121285	0.044	6.49705	0.255212	0.167	6.09231	0.367012	0.273
YJL026W	NA	NA	NA	NA	7.99792	0.00186882	NA	8.0559	0.0193834	0.013	8.1788	0.0731771	0.06
YJL031C	BET4	4.94754	0.0122829	NA	4.93519	0.0349414	NA	4.94238	0.2258	0.148	4.96816	0.282661	0.204
YJL034W	KAR2	9.01723	0.00693544	NA	9.04336	0.0126421	NA	9.00953	0.035275	0.019	9.29079	0.0990499	0.083
YJL039C	NUP192	8.61394	0.000239585	NA	8.62061	0.0222143	0.005	8.29404	0.0337621	0.018	8.21637	0.0377477	0.023
YJL044C	GYP6	7.45573	-0.002894	NA	7.33903	0.0551772	0.02	7.13067	0.177913	0.125	7.03901	0.22464	0.174
YJL046W	AIM22	5.99415	-0.0124751	NA	5.66462	0.0296646	NA	5.12231	-0.0210706	NA	4.79953	-0.0945453	NA
YJL048C	UBX6	5.36112	-0.00232333	NA	5.42169	0.149737	0.075	5.3081	0.273447	0.194	5.28706	0.325808	0.247
YJL050W	NA	NA	NA	NA	NA	NA	NA	8.34365	0.0103676	0.006	8.50196	0.0402554	0.031
YJL051W	IRC8	4.88386	-0.0655109	NA	4.78642	0.0613455	NA	4.30323	0.131513	0.009	4.37872	0.0180689	NA
YJL054W	TIM54	6.28844	0.0564512	NA	6.17534	0.168118	0.076	6.00876	0.370945	0.271	5.99212	0.571731	0.491
YJL061W	NUP82	5.92681	0.0113711	NA	5.54819	0.0239436	NA	4.83011	-0.0561172	NA	4.56149	0.042101	NA
YJL062W	LAS21	7.36506	0.000558752	NA	7.35702	0.00674621	0	7.06331	0.0293651	0.017	6.77323	0.0336074	0.018
YJL071W	ARG2	5.30319	0.0528645	NA	5.24555	0.0399343	NA	5.20853	0.0569554	NA	5.15336	0.0617454	0.004
YJL072C	PSF2	4.57929	0.0151454	NA	4.23743	-0.000257471	NA	3.60203	-0.0307523	NA	3.09413	-0.0186036	NA
YJL076W	NET1	6.22252	0.0438422	NA	6.11597	0.132923	0.043	5.91967	0.467284	0.358	6.09558	0.682796	0.605
YJL080C	SCP160	8.79217	-0.00133638	NA	8.79472	-0.000766986	NA	8.7807	0.00749731	0.003	8.91845	0.0239701	0.018
YJL081C	ARP4	5.92461	0.105877	0.011	5.83929	0.192803	0.086	5.53261	0.261571	0.159	5.17329	0.381933	0.261
YJL082W	IML2	5.48695	0.0106212	NA	5.34078	0.0164573	NA	5.12926	0.0532042	NA	5.02567	0.0605279	NA
YJL088W	ARG3	9.15511	0.00161985	NA	9.04526	0.00735064	0.004	8.58633	0.0508809	0.039	8.33739	0.0803722	0.062
YJL091C	GWT1	6.1372	0.016435	NA	5.93817	0.0164039	NA	5.3971	0.107466	0.021	5.04394	0.0872681	NA
YJL092W	SRS2	6.67904	-0.00141605	NA	6.46323	0.010314	NA	6.05014	0.0732561	0.038	5.93328	0.0842551	0.043
YJL093C	TOK1	5.5594	0.0435508	NA	5.51321	0.190498	0.089	5.088	0.242063	0.142	4.87968	0.247906	0.146
YJL101C	GSH1	5.95822	0.036082	NA	5.81905	0.0302571	NA	5.49387	0.127867	0.037	5.33092	0.135371	0.045
YJL107C/YJL108C	PRM10	3.11066	0.0891818	NA	3.19124	0.241316	0.053	3.17924	0.422734	0.243	3.66508	0.377768	0.227
YJL109C	UTP10	8.96383	0.000487271	NA	8.92733	0.00383781	0	8.68672	0.0113871	0.006	8.48774	0.0135461	0.007
YJL110C	GZF3	5.62165	0.00835999	NA	5.61871	0.073141	0.033	5.80572	0.19749	0.143	6.0271	0.230448	0.182
YJL111W	CCT7	8.03786	0.0308941	NA	8.03556	0.0349065	NA	7.89778	0.129806	0.08	7.85459	0.420804	0.365
YJL112W	NA	NA	NA	NA	5.42997	0.0199466	0.004	5.44413	0.071896	0.043	5.70821	0.111818	0.076
YJL115W	ASF1	4.92382	0.0739729	NA	4.73165	-0.0120141	NA	4.75334	0.0743134	NA	4.95014	0.134802	0.05
YJL121C	RPE1	7.81115	-0.00426294	NA	7.86016	0.00763456	NA	7.91322	0.0277333	0.009	7.69872	0.0647093	0.043
YJL123C	MTC1	7.24268	0.0165444	NA	7.09781	0.109693	0.031	7.02995	0.304609	0.221	7.09328	0.3977	0.331
YJL124C	LSM1	6.99173	0.00218414	NA	7.03648	0.0628718	0.019	7.08676	0.273963	0.203	7.06811	0.451578	0.385
YJL127C-B		6.48852	0.029428	NA	6.3337	0.0280338	NA	5.95867	-0.00278234	NA	5.5733	0.00989098	NA
YJL128C	PBS2	5.75426	0.0587797	NA	5.58738	0.150095	0.052	5.26738	0.161725	0.069	5.14923	0.207814	0.114
YJL131C	AIM23	3.69008	0.0153099	NA	3.65492	0.0926664	NA	3.39581	0.258457	0.101	3.53346	0.328415	0.179
YJL133W	NA	NA	NA	NA	NA	NA	NA	5.49863	0.0464059	0.026	5.52727	0.109838	0.077
YJL134W/YJL135W	LCB3	6.20103	-0.00022063	NA	6.13347	0.035138	0.005	5.87631	0.107884	0.063	5.68072	0.113255	0.061
YJL136C	RPS21B	10.7422	0.0187989	NA	10.7596	0.0174934	NA	10.7146	-0.0379737	NA	10.4781	-0.0706407	-0.038
YJL138C	TIF2	8.91018	0.0239439	0.005	8.99387	0.0223681	0.005	9.21979	0.0186065	NA	9.15647	0.0131387	NA
YJL141C/YJL142C	IRC9/YAK1	5.36258	0.0113558	NA	5.34017	0.0610933	0.025	5.12748	0.0725721	0.033	5.13676	0.171343	0.107
YJL143W	TIM17	7.9841	0.0109048	NA	7.92245	0.0793932	0.014	7.6583	0.176167	0.106	7.37146	0.269306	0.208
YJL146W	IDS2	4.97774	0.0192213	NA	4.85053	0.0440124	NA	4.50107	0.0292854	NA	4.76736	0.0594318	NA
YJL147C		4.06545	0.0275174	NA	3.80825	-0.0147869	NA	3.57486	0.0919067	NA	3.20095	0.0901321	NA
YJL148W	RPA34	6.71659	0.0335377	NA	6.52805	0.0408417	NA	6.09949	0.0303912	NA	5.76609	-0.0128811	NA
YJL151C	SNA3	8.40344	0.00457972	NA	8.2755	0.00522502	NA	7.97466	5.23448e-05	NA	7.315	0.0139602	0.002
YJL154C	VPS35	6.96218	0.0224579	NA	6.80382	0.0553938	0.006	6.39905	0.106332	0.047	6.18579	0.177054	0.112
YJL155C	FBP26	4.96043	0.0090737	NA	4.83268	0.0226401	NA	4.80026	0.0953982	0.049	5.03175	0.102203	0.057
YJL158C	CIS3	10.0845	0.00201756	NA	10.1061	0.05111	NA	10.0273	0.187702	0.13	9.68641	0.395559	0.339
YJL163C		3.84226	-0.0159751	NA	3.67545	0.0548387	NA	3.24113	0.224158	0.071	3.08958	0.108254	NA
YJL164C	TPK1	5.36614	0.0758537	NA	5.20875	0.11147	0.023	4.93151	0.16646	0.072	4.60245	0.19149	0.086
YJL165C	HAL5	5.84544	0.029615	NA	5.84084	0.143495	0.083	5.84085	0.374883	0.292	6.22743	0.458374	0.391
YJL166W	QCR8	7.37128	0.000759176	NA	7.33608	0.0119851	0.002	7.20889	0.0476955	0.031	7.25329	0.111855	0.088
YJL167W	ERG20	10.0034	0.000114608	NA	10.0236	0.00084579	NA	10.1147	0.0208198	0.016	10.1672	0.0760543	0.065
YJL168C	SET2	5.44522	0.0101626	NA	5.25838	0.0276627	NA	5.0011	-0.00828331	NA	4.90956	0.0242528	NA
YJL171C		8.65171	-0.00380181	NA	8.60613	-0.000423292	NA	8.39777	-0.0137915	NA	8.16318	-0.0201621	NA
YJL172W	CPS1	6.4068	-0.0132528	NA	6.42695	0.0557813	NA	6.5699	0.0984391	0.035	6.49552	0.134918	0.08
YJL173C	RFA3	6.91764	0.0358047	NA	6.94733	0.120079	0.056	6.82644	0.23173	0.162	6.2474	0.363222	0.283
YJL174W	KRE9	9.06604	0.0214862	NA	8.98366	0.0898602	0.025	8.67961	0.245677	0.173	8.58787	0.320859	0.261
YJL176C	SWI3	4.6572	0.0777434	NA	4.71626	0.108372	0.026	4.54192	0.404611	0.291	4.59941	0.565177	0.465
YJL177W	RPL17B	10.1791	0.00371563	NA	10.2043	0.0352395	0.02	10.2195	0.131695	0.103	10.0318	0.192629	0.164
YJL183W	MNN11	6.80227	0.00612899	NA	6.8078	0.0104095	0	6.5663	0.0342235	0.018	6.23295	0.0458203	0.023
YJL187C	SWE1	4.77784	-0.0220923	NA	4.74374	0.0997218	0.001	4.43151	0.347767	0.213	4.33164	0.379666	0.254
YJL189W	RPL39	8.51233	-0.0016182	NA	8.68596	-0.00034783	NA	8.87643	0.016156	0.011	8.92373	0.0403613	0.032
YJL190C	RPS22A	10.9594	0.000348696	NA	10.9632	0.00191134	0	10.9505	0.00619046	0.004	10.8553	0.0117514	0.009
YJL191W	RPS14B	8.93174	0.00628104	NA	8.95446	0.00772622	NA	8.93555	0.000296225	NA	8.35741	0.0171493	0.007
YJL193W		5.49231	-0.0161836	NA	5.65242	0.0474486	0.005	5.81558	0.0703932	0.032	5.94813	0.0454139	0.009
YJL197W	UBP12	5.47986	-0.00448767	NA	5.38545	-0.00450511	NA	5.24417	0.0852423	0.043	5.24083	0.202175	0.14
YJL200C	ACO2	10.1821	-0.000147257	NA	10.189	0.0102072	0.006	10.0903	0.0835447	0.066	10.1209	0.178213	0.152
YJL201W	ECM25	6.73631	0.0176436	NA	6.72459	0.229054	0.131	6.61076	0.445182	0.352	6.60507	0.597753	0.524
YJL207C	LAA1	7.36775	0.0454809	0.013	7.34527	0.0402307	0.013	7.08853	-0.000500521	NA	7.103	-0.0123527	NA
YJL208C	NUC1	5.95235	0.0798805	NA	5.88454	0.135333	0.047	5.51904	0.1753	0.089	5.30328	0.130015	0.051
YJL212C	OPT1	4.12253	-0.0212958	NA	4.01241	0.0375284	NA	3.37602	-0.0561113	NA	3.03445	-0.0866986	NA
YJL213W		4.7729	0.0356186	NA	4.50832	0.111263	0.001	4.19851	0.108508	NA	4.11405	0.212751	0.108
YJL217W	REE1	7.58332	0.00127222	NA	7.55842	-0.00098292	NA	7.56689	0.00494911	NA	7.37648	0.00624355	NA
YJL221C	NA	NA	NA	NA	NA	NA	NA	1.55396	0.278913	0.098	1.42448	0.486168	0.273
YJL225C		5.9157	0.0660486	NA	5.86746	0.0714559	NA	5.69055	0.122874	0.042	5.75866	0.219704	0.143
YJR001W	AVT1	6.64766	0.0214005	NA	6.57174	0.0201316	NA	6.3393	0.0659413	0.029	5.85192	0.108114	0.057
YJR002W	MPP10	6.22285	0.015466	NA	6.10888	0.028427	NA	5.78709	0.0505473	0.017	5.49056	0.0484288	0.014
YJR003C		5.678	0.00331941	NA	5.4861	0.0560335	0.019	5.06151	0.0806709	0.036	4.99909	0.0993784	0.044
YJR004C	SAG1	3.70723	0.00950451	NA	3.51902	0.0553459	NA	3.26236	0.033862	NA	3.41347	0.0699916	NA
YJR005W	APL1	5.70763	0.0784316	NA	5.55587	0.172939	0.068	5.24465	0.23478	0.129	5.20689	0.274965	0.178
YJR006W	POL31	6.31279	-0.000322034	NA	6.23641	0.0167909	NA	5.91906	0.142073	0.093	5.69097	0.218435	0.156
YJR008W	MHO1	4.42736	-0.0104288	NA	4.42441	0.0980705	NA	4.54095	0.389784	0.254	4.69593	0.347072	0.236
YJR010C-A	SPC1	5.58907	0.0112726	NA	5.54826	-0.00716067	NA	5.14949	-0.0566503	-0.004	4.7704	-0.038451	NA
YJR011C		5.24949	0.0878542	NA	5.04565	0.0834909	NA	4.53038	0.227108	0.104	4.37804	0.156133	0.044
YJR014W	TMA22	7.33403	0.0880786	0.008	7.15569	0.0876652	0.014	6.9437	0.118994	0.046	6.4347	0.142216	0.07
YJR015W		6.73326	-0.0150817	NA	6.85772	0.0750793	0.005	6.7482	0.153751	0.083	6.61205	0.187534	0.125
YJR016C	ILV3	9.10772	0.0071352	NA	9.18041	0.016375	NA	9.2472	-0.0172648	NA	9.26889	-0.0113801	NA
YJR025C	BNA1	7.71892	0.0480016	NA	7.58146	0.0525586	NA	7.57137	0.0512351	NA	7.26635	0.100865	0.052
YJR028W/YJR029W		9.88218	0.10467	0.027	9.85747	0.102364	0.029	10.0877	0.0723553	0.004	10.2141	0.0907007	0.038
YJR031C	GEA1	6.68774	-0.0044384	NA	6.50459	0.00853154	NA	6.03198	0.0179874	NA	5.61063	0.0224413	NA
YJR034W	PET191	4.29818	0.03464	NA	4.23965	0.0894164	NA	3.7567	0.170697	0.032	3.72969	0.320612	0.177
YJR036C	HUL4	4.01924	0.00408118	NA	3.86785	0.0485904	NA	3.72493	0.159414	0.075	3.77709	0.2377	0.137
YJR040W	GEF1	6.46516	-0.00312098	NA	6.42396	0.0151191	NA	6.10105	0.0680571	0.04	5.8739	0.131537	0.088
YJR042W	NUP85	6.45963	0.027095	NA	6.51683	-0.00645345	NA	6.39918	-0.00630339	NA	6.39595	0.0161947	NA
YJR045C	SSC1	10.144	0.0104832	NA	10.1027	0.0081555	NA	10.1905	0.0212256	NA	10.3802	0.0347167	0.018
YJR049C	UTR1	5.5163	-0.00963087	NA	5.33076	0.0391694	NA	5.06524	0.083597	NA	4.69381	0.028328	NA
YJR051W	OSM1	6.95391	0.00779457	NA	6.79232	0.0140403	NA	6.37293	0.0230857	0.004	5.79711	0.060425	0.024
YJR054W	KCH1	6.09552	-0.00545697	NA	5.87457	0.0667692	0.002	5.28109	0.0601534	NA	5.08849	0.151407	0.062
YJR058C	APS2	7.69232	0.00313338	NA	7.57423	0.00261808	NA	7.17841	0.00969355	NA	6.81933	0.0244568	0.008
YJR059W	PTK2	5.91049	0.0154309	NA	5.8147	0.129227	0.047	5.83358	0.185166	0.109	6.25549	0.231071	0.173
YJR063W	RPA12	7.19326	-0.000852551	NA	7.2275	0.0014696	NA	7.0827	0.0156749	0.004	6.98741	0.0613585	0.041
YJR064W	CCT5	7.28866	0.00686385	NA	7.41793	0.0805244	0.047	7.55285	0.361848	0.288	7.79113	0.50874	0.444
YJR065C	ARP3	8.37971	0.00420695	NA	8.35304	0.0146532	0.007	8.38332	0.0594972	0.045	8.22168	0.144861	0.119
YJR072C	NPA3	6.55309	0.0117519	NA	6.39968	0.0756976	0.03	6.33462	0.148659	0.095	6.19443	0.215038	0.155
YJR075W	HOC1	8.15038	0.0248891	NA	8.17277	0.0499804	NA	8.16017	0.104831	0.053	8.02651	0.101253	0.058
YJR077C	MIR1	7.59424	-0.0318791	NA	7.64615	0.0465684	NA	7.68355	0.127964	0.057	7.68114	0.275352	0.211
YJR082C	EAF6	5.69136	-0.000200128	NA	5.74934	0.034617	0.002	5.65017	0.0745669	0.036	5.55263	0.0887186	0.047
YJR088C	EMC2	7.56558	0.0218521	NA	7.53386	0.0760626	0.019	7.39218	0.151786	0.094	7.08688	0.161512	0.113
YJR089W	BIR1	5.43982	0.00603085	NA	5.2789	0.105209	0.05	4.9103	0.365928	0.265	4.86687	0.595824	0.499
YJR090C	GRR1	5.7618	0.0162319	NA	5.61731	0.107532	0.055	5.20744	0.30221	0.213	5.02462	0.414182	0.317
YJR098C		3.33747	-0.0244297	NA	3.29672	0.0245689	NA	3.15121	0.133354	NA	3.11517	0.347343	0.175
YJR099W	YUH1	6.04527	0.0355705	NA	5.93626	0.0480486	NA	5.68031	0.000504206	NA	5.04075	0.0677925	NA
YJR101W	RSM26	6.87769	0.0292608	NA	6.80127	0.0356785	NA	6.53544	0.040561	0.003	6.5437	0.0384496	0.007
YJR109C	CPA2	9.45923	-0.000451673	NA	9.47242	0.000912407	NA	9.35578	0.00936535	0.006	9.14883	0.0467498	0.037
YJR122W	IBA57	5.51832	-0.00806721	NA	5.37894	0.0332524	0.007	5.27407	0.311358	0.23	5.62585	0.523701	0.449
YJR124C		5.81285	-0.0258326	NA	5.72896	0.0350516	NA	5.53322	0.111553	0.036	5.39201	0.25146	0.184
YJR127C	RSF2	6.01348	-0.00594768	NA	5.89167	0.0191214	NA	5.62479	0.0403149	0.013	5.57311	0.137874	0.09
YJR131W	MNS1	4.97521	0.0336923	NA	4.82746	-0.00509613	NA	4.61617	0.0160602	NA	3.85922	0.0540699	NA
YJR132W	NMD5	6.58345	0.0455109	NA	6.36996	0.070029	NA	5.7925	0.184633	0.094	5.49284	0.146972	0.054
YJR134C	NA	NA	NA	NA	NA	NA	NA	5.65733	0.0495922	0.027	5.82169	0.119993	0.086
YJR135W-A	TIM8	6.1591	0.0234902	NA	6.14407	0.00960006	NA	6.12532	0.0626811	0.004	5.69532	0.145379	0.076
YJR137C	NA	NA	NA	NA	4.61655	0.0227987	NA	4.66239	0.163279	0.106	5.02925	0.334453	0.27
YJR142W		5.83671	0.012463	NA	5.76841	0.0644825	0.015	5.61935	0.180804	0.112	5.55111	0.202873	0.137
YJR143C	PMT4	8.40911	-0.00021904	NA	8.46071	0.000755496	NA	8.49236	0.0173568	0.008	8.58107	0.0295829	0.02
YJR144W	MGM101	6.53542	-0.00438809	NA	6.49029	0.0189121	NA	6.36452	0.098558	0.064	6.34211	0.236896	0.185
YJR145C	RPS4A	10.7654	0.00534378	NA	10.7975	0.0356565	0.02	10.8808	0.131733	0.103	10.8383	0.209246	0.179
YJR146W/YJR147W	HMS2	5.81434	0.0172739	NA	5.68234	0.0480239	NA	5.27915	0.0403557	NA	4.95408	0.0814296	0.019
YJR148W	BAT2	8.61697	-0.00391624	NA	8.58369	-0.00145922	NA	8.41581	-0.0017356	NA	7.94419	-0.00774439	NA
YJR149W		3.65574	-0.0139381	NA	3.6293	-0.0566984	NA	3.60885	-0.233397	-0.085	3.52654	-0.21915	-0.077
YJR155W	AAD10	4.93005	-0.021841	NA	4.8497	0.08872	NA	4.91404	0.401547	0.272	4.97168	0.446805	0.335
YKL002W	DID4	7.04673	0.0411391	NA	7.02597	0.150199	0.062	6.98234	0.286318	0.198	6.8442	0.425979	0.353
YKL003C	MRP17	7.06096	-0.00663544	NA	6.96791	0.0409239	0.016	6.65434	0.197072	0.147	6.54906	0.2505	0.2
YKL004W	NA	NA	NA	NA	7.6237	0.00457127	0	7.69711	0.0184176	0.011	7.80826	0.0630391	0.05
YKL005C	BYE1	7.55697	0.0101774	NA	7.55837	0.0335424	0.012	7.41728	0.0785647	0.054	7.39082	0.175566	0.144
YKL006C-A	SFT1	6.80622	0.0266638	NA	6.77762	0.0912324	0.022	6.51526	0.214433	0.133	6.55608	0.288231	0.216
YKL008C	LAC1	6.92645	-0.00287874	NA	6.81859	0.0711358	0.008	6.55148	0.197537	0.12	6.05638	0.22542	0.143
YKL009W	NA	NA	NA	NA	NA	NA	NA	7.23372	0.026304	0.017	7.24513	0.070511	0.054
YKL011C	CCE1	4.51068	0.0243276	NA	4.38394	0.0580709	NA	4.36506	0.112837	0.042	4.39064	0.195217	0.111
YKL014C	URB1	7.14368	-0.000838191	NA	7.12535	0.0031935	NA	6.93625	0.044638	0.029	6.79179	0.0594264	0.041
YKL015W	PUT3	6.24986	-0.00354244	NA	6.12763	0.00374265	NA	5.68607	0.032083	NA	5.62912	0.0701487	0.025
YKL018C-A		6.72801	0.0604954	NA	6.6668	0.0634756	NA	6.55924	0.0591634	NA	6.30924	0.0584331	NA
YKL023W		4.2487	-0.0426277	NA	4.05022	-0.0202693	NA	3.63431	-0.0755061	NA	3.15027	-0.108544	NA
YKL025C	PAN3	6.60078	0.0091422	NA	6.52749	0.0325992	0.01	6.24689	0.0454026	0.021	6.16697	0.0523718	0.024
YKL026C	GPX1	3.91283	0.106893	0.002	4.01126	0.0718763	NA	3.95446	0.260298	0.147	4.07546	0.339061	0.23
YKL028W	TFA1	5.76367	0.0203906	NA	5.6532	0.0455269	0.006	5.46177	0.0475771	0.008	5.50984	0.0271737	NA
YKL029C	MAE1	7.13465	0.00196505	NA	7.2291	0.0130949	NA	7.1823	0.00748612	NA	7.24593	0.0372605	NA
YKL032C	IXR1	5.88603	-0.00468745	NA	5.74092	-0.00440554	NA	5.40188	0.0241676	NA	5.34765	0.00544468	NA
YKL033W-A		7.15908	0.0101418	NA	7.20557	0.0500736	0.018	7.20782	0.131592	0.089	7.29484	0.202714	0.159
YKL035W	UGP1	8.72219	-0.000262344	NA	8.68865	0.00412764	0.001	8.67565	0.0342585	0.026	8.69034	0.102161	0.086
YKL039W	PTM1	6.36266	0.0479482	NA	6.4374	0.115934	0.034	6.59622	0.142104	0.068	6.91109	0.151083	0.088
YKL041W	VPS24	5.22461	-0.0198418	NA	5.06095	0.0708163	NA	4.57235	0.0759973	NA	4.27458	0.0569258	NA
YKL046C	DCW1	7.46664	-0.000927389	NA	7.47134	0.0106514	NA	7.44909	0.0150055	NA	7.30607	0.0386051	0.02
YKL047W	ANR2	6.49899	0.0145868	NA	6.33068	0.0908588	0.033	5.87649	0.301119	0.211	5.84944	0.373926	0.289
YKL052C	ASK1	6.36287	0.00267595	NA	6.26848	0.0237419	0.004	6.22819	0.100332	0.067	6.24526	0.159776	0.119
YKL056C	TMA19	11.4834	0.0168513	NA	11.4797	0.0357689	NA	11.5561	0.058416	0.014	11.4267	0.0616431	0.026
YKL057C	NUP120	6.53262	0.0013675	NA	6.45939	0.0146397	NA	6.3627	0.0315081	0.013	6.40705	0.0447958	0.024
YKL058W	TOA2	6.99643	0.0051108	NA	6.90324	0.0686807	0.013	6.43156	0.0893356	0.03	6.00932	0.0660647	NA
YKL060C	FBA1	12.9354	-9.84589e-06	NA	12.9838	7.4088e-05	NA	13.1324	0.000677308	0	13.2405	0.00236653	0.001
YKL061W	BLI1	5.31102	-0.0180285	NA	5.279	0.0427245	NA	5.11642	0.0741296	0.011	4.8798	0.0981947	0.037
YKL063C		7.50954	0.00446209	NA	7.26307	0.024967	0.008	6.74794	0.0323655	0.012	6.53409	0.059823	0.029
YKL064W	MNR2	5.08246	0.0294424	NA	4.93599	0.0777057	NA	4.72566	0.123679	0.022	4.62423	0.210072	0.106
YKL065C	YET1	8.68699	0.0308133	0.001	8.72542	0.0580266	0.029	8.578	0.180227	0.145	8.39439	0.374411	0.327
YKL065W-A		2.46714	0.0207334	NA	2.35226	0.210004	NA	2.46368	0.269845	0.065	2.97788	0.250327	0.08
YKL068W-A		6.47215	0.0382334	NA	6.24731	0.197183	0.092	6.07499	0.307442	0.209	6.02233	0.320195	0.238
YKL069W		5.82025	0.0491216	NA	5.58026	0.0136001	NA	5.35766	0.0270332	NA	4.62013	0.0505409	NA
YKL073W	NA	NA	NA	NA	NA	NA	NA	5.44649	0.0719275	0.043	5.54196	0.21997	0.169
YKL075C/YKL076C	PSY1	4.47745	0.0424609	NA	4.09242	-0.0598525	NA	3.68367	-0.0263021	NA	3.52172	0.0401463	NA
YKL077W		7.33595	0.0222439	NA	7.40631	0.0837569	0.017	7.23875	0.207592	0.131	7.07053	0.337314	0.264
YKL081W	TEF4	9.78606	0.0242227	NA	9.88067	0.0285195	NA	10.1396	0.0077744	NA	10.2869	0.00400586	NA
YKL085W	MDH1	7.20435	-0.0303812	NA	7.12418	-0.0229391	NA	6.70585	0.00350175	NA	6.74101	-0.029757	NA
YKL089W	MIF2	3.64715	-0.0106155	NA	3.17357	0.0901604	NA	2.95704	-0.00362738	NA	2.4567	0.0598707	NA
YKL092C	BUD2	5.27829	0.0269222	NA	5.08131	0.0534813	NA	4.87444	0.216866	0.125	4.77227	0.278295	0.183
YKL093W	MBR1	2.46732	0.0708193	NA	2.89847	0.286798	0.063	3.28212	0.371086	0.181	3.79062	0.443515	0.276
YKL096W-A	CWP2	13.0378	0.00848811	0.004	13.0892	0.00680785	0.002	13.0456	-0.00482739	NA	13.0465	-0.00887657	-0.004
YKL098W	MTC2	4.92014	0.0161986	NA	4.79305	0.0677515	0.008	4.604	0.115203	0.046	4.36617	0.276926	0.17
YKL100C		7.0686	0.0124019	NA	7.12139	0.0222563	NA	6.99703	0.0659004	0.04	6.83201	0.146226	0.111
YKL103C	APE1	5.81899	0.0114476	NA	5.78142	-0.0218597	NA	5.51122	-0.0421613	NA	5.20691	-0.0693863	NA
YKL106W	AAT1	5.75391	0.00281213	NA	5.79751	0.0123978	NA	5.82869	0.0913049	0.043	5.87197	0.269496	0.205
YKL108W	SLD2	5.08067	0.0338976	NA	4.84981	0.124648	0.02	4.98848	0.397136	0.276	5.4403	0.561572	0.477
YKL115C/YKL116C	PRR1	5.83473	0.0769031	NA	5.85156	0.256493	0.146	5.82256	0.330882	0.235	5.91756	0.358138	0.279
YKL117W	SBA1	7.84364	0.076905	0.002	7.9292	0.0760766	0.004	8.03637	0.117098	0.048	8.27256	0.190382	0.129
YKL120W	OAC1	8.50253	0.0048714	NA	8.42576	0.050149	0.031	8.23479	0.112394	0.084	8.2538	0.140553	0.113
YKL122C	SRP21	6.50089	0.00209465	NA	6.45792	0.0371266	0.009	6.35923	0.14332	0.097	6.3181	0.209357	0.159
YKL125W	RRN3	5.52542	0.023626	NA	5.50206	0.0923301	0.045	5.19053	0.267368	0.187	5.16681	0.273173	0.199
YKL126W	YPK1	6.07204	0.000700682	NA	6.04941	0.018224	0.003	5.9955	0.123363	0.086	5.93093	0.272918	0.218
YKL128C	PMU1	7.14784	0.0294192	NA	7.05052	0.11742	0.039	6.64542	0.263362	0.178	6.13748	0.384298	0.288
YKL130C	SHE2	6.58478	0.0110685	NA	6.45389	0.0303358	0.013	6.05544	0.123253	0.083	5.77141	0.193932	0.137
YKL132C	RMA1	4.65691	0.0621349	NA	4.48254	0.0934861	NA	4.25833	0.157252	0.039	4.17171	0.284495	0.157
YKL133C		3.17111	0.0423689	NA	2.92698	0.18073	0.041	2.91486	0.344788	0.185	2.69231	0.458317	0.275
YKL135C	APL2	6.2906	0.036792	NA	6.31925	0.170699	0.075	6.29429	0.356332	0.267	6.38302	0.437412	0.366
YKL140W	TGL1	6.05469	0.00193009	NA	5.98881	0.00523655	NA	5.72477	0.020142	NA	5.6256	0.0402191	0.011
YKL142W	MRP8	5.90324	0.00763162	NA	5.9239	0.113093	0.062	6.02629	0.328946	0.257	6.2607	0.512762	0.446
YKL144C	RPC25	5.02447	-0.00645237	NA	4.96915	-0.00350609	NA	4.39478	0.0430026	NA	3.87926	0.0463306	NA
YKL145W/YKL145W-A	RPT1	7.31689	0.0300438	NA	7.21888	0.0885656	0.017	7.01114	0.153483	0.081	6.64603	0.19882	0.134
YKL150W	MCR1	6.54519	0.0728588	NA	6.57124	0.0385483	NA	6.56666	0.110565	0.044	6.60297	0.235664	0.171
YKL152C	GPM1	12.6575	8.77293e-05	NA	12.6887	0.000549068	0	12.8634	0.00274695	0.002	12.9763	0.0100281	0.008
YKL155C	RSM22	4.78914	-0.00905294	NA	4.7496	0.000844842	NA	4.85457	0.0723418	0.031	5.29157	0.187241	0.137
YKL156W	RPS27A	9.61063	0.0233911	NA	9.70312	0.0208005	NA	9.76813	0.0098703	NA	9.44811	0.019403	NA
YKL157W	APE2	7.18046	0.0143082	NA	7.12559	0.0358803	0.012	7.14943	0.0963736	0.063	7.0345	0.177772	0.137
YKL159C	RCN1	3.96207	0.0115943	NA	3.73044	0.111284	NA	3.15956	0.0799522	NA	2.68422	0.0207901	NA
YKL164C	PIR1	8.31983	0.0460134	NA	8.29241	0.119375	0.054	8.18294	0.102207	0.046	8.13545	0.117058	0.069
YKL165C	MCD4	6.51218	0.00537698	NA	6.44912	0.054927	NA	6.17727	0.112095	0.038	5.806	0.0829032	NA
YKL167C	MRP49	6.23867	0.0214073	NA	6.1586	0.138378	0.053	5.8755	0.297391	0.2	5.89222	0.367628	0.282
YKL168C	KKQ8	5.29639	0.0672779	NA	5.05974	0.0868276	NA	4.54443	0.183662	0.068	4.55052	0.0910298	NA
YKL172W	NA	NA	NA	NA	NA	NA	NA	7.11914	0.039284	0.026	7.09233	0.119397	0.094
YKL173W	SNU114	5.96705	0.0425864	NA	5.91773	0.178903	0.076	5.85608	0.302505	0.202	5.78923	0.450205	0.364
YKL175W	ZRT3	6.16845	0.0316234	NA	6.19835	0.0317372	NA	6.31643	0.13564	0.066	6.37437	0.189459	0.123
YKL176C	LST4	5.98238	0.0332743	NA	5.96813	0.0713231	NA	5.69125	0.152116	0.07	5.45035	0.173967	0.097
YKL179C	COY1	5.90685	-0.00915549	NA	5.6409	0.155242	0.052	5.39455	0.289735	0.18	5.20186	0.428188	0.321
YKL180W	RPL17A	9.84214	0.16118	0.077	9.87889	0.182088	0.093	9.923	0.109412	0.041	9.81284	0.168364	0.111
YKL181W	PRS1	8.72753	-9.57268e-05	NA	8.72666	0.0132487	0.007	8.74889	0.0593616	0.046	8.70104	0.0936221	0.077
YKL182W	FAS1	10.0423	0.00135836	NA	10.0454	0.0318101	0.009	9.96479	0.0864133	0.056	9.81396	0.163431	0.13
YKL185W	ASH1	7.04585	0.0441766	NA	6.9937	0.0529424	0.014	6.90509	0.00979266	NA	6.92702	0.0394957	0.004
YKL188C	PXA2	2.73035	0.0547709	NA	2.75452	0.135511	NA	2.43375	0.264743	0.082	2.73274	0.42095	0.241
YKL189W	HYM1	5.15402	0.00226571	NA	4.99011	0.0688448	0.02	4.54361	0.139499	0.069	4.46037	0.146991	0.068
YKL190W	CNB1	7.13656	-0.00165606	NA	7.17212	0.0119971	NA	7.17745	0.0126739	NA	7.12201	0.0369594	0.019
YKL195W	MIA40	5.84555	-0.00717795	NA	5.78928	0.0106826	NA	5.66259	0.0703495	0.033	5.80167	0.17406	0.124
YKL197C	PEX1	4.02632	0.0277675	NA	3.82849	0.0956703	NA	3.29709	0.0454134	NA	2.68361	0.0918359	NA
YKL203C	TOR2	5.69768	0.0173093	NA	5.63152	0.189955	0.108	5.38806	0.43856	0.336	5.18255	0.532885	0.438
YKL204W	EAP1	5.39855	0.0270852	NA	5.29676	0.128794	0.069	5.16438	0.331984	0.246	5.14227	0.515105	0.429
YKL205W	LOS1	5.90865	0.0215845	NA	5.96171	0.165918	0.08	5.65774	0.458069	0.351	5.65714	0.594713	0.508
YKL209C	STE6	6.52775	0.00498389	NA	6.58662	0.0478904	NA	6.54656	0.158087	0.099	6.70496	0.200088	0.148
YKL211C	TRP3	8.04953	0.00201535	NA	8.12814	0.00476144	NA	7.8891	0.0267517	0.016	7.86715	0.0561176	0.041
YKL212W	SAC1	6.93796	0.00716548	NA	6.98723	0.00940117	NA	6.95064	0.000745545	NA	6.93552	0.0154288	0.002
YKL214C	YRA2	5.13198	0.036474	NA	5.07631	0.0712553	NA	5.27762	0.108848	0.037	4.9774	0.26834	0.172
YKL215C	OXP1	4.44443	-0.0240977	NA	4.45548	0.0874763	NA	4.48192	0.105318	NA	4.3394	0.153327	0.057
YKL218C	SRY1	6.31855	0.035724	NA	6.13485	0.0220935	NA	5.69136	0.0377616	NA	4.95179	0.136029	0.009
YKL219W	COS9	5.87878	-0.0264628	NA	5.8301	0.0608157	NA	5.34482	0.285936	0.175	4.94611	0.549644	0.425
YKL220C	FRE2	3.17717	0.0732611	NA	3.02657	-0.0711083	NA	2.62061	-0.00545197	NA	2.75921	0.0383395	NA
YKR001C	VPS1	8.02009	0.0122586	NA	7.98923	0.0533891	0.02	7.9133	0.162968	0.113	7.75798	0.288824	0.236
YKR003W	OSH6	6.10482	0.0190988	NA	5.95701	0.00472789	NA	5.62538	0.0151605	NA	5.23743	0.0557544	NA
YKR008W	RSC4	6.59073	-0.00981985	NA	6.60859	0.0907132	0.055	6.72191	0.50725	0.418	6.92753	0.725136	0.657
YKR010C	TOF2	5.49914	-0.00480336	NA	5.17224	0.0780836	NA	4.73414	0.0899274	NA	4.5355	0.158845	0.045
YKR011C		6.01016	0.0213028	NA	5.97557	0.094622	0.045	5.75317	0.248548	0.173	6.28645	0.4439	0.374
YKR013W	PRY2	6.94819	0.0223293	NA	6.94716	0.163227	0.073	6.65202	0.454498	0.358	6.57718	0.581441	0.509
YKR014C	YPT52	8.17689	-0.00232433	NA	8.26623	0.014769	0.003	8.3144	0.0255162	0.014	8.4983	0.0592213	0.046
YKR016W	MIC60	6.55606	0.00879826	NA	6.45985	0.0471342	0.012	6.25237	0.0684916	0.034	6.26841	0.0945357	0.067
YKR017C	HEL1	3.10022	0.00643171	NA	3.07321	0.179964	NA	3.04796	0.574637	0.381	3.37067	0.665978	0.519
YKR018C		7.60796	-0.038229	-0.003	7.49209	-0.00602671	NA	7.40165	0.0583692	0.02	6.94097	0.121778	0.077
YKR019C	IRS4	3.7719	0.0317833	NA	3.66083	0.0471905	NA	3.39689	0.00853655	NA	3.31387	0.0946941	NA
YKR020W	VPS51	5.28639	0.0400039	NA	5.15214	0.0615545	0.011	4.8247	0.100806	0.037	4.5686	0.244391	0.147
YKR024C	DBP7	4.97092	0.020651	NA	4.75182	0.0555221	NA	4.51218	0.207821	0.102	4.5192	0.196931	0.1
YKR028W	SAP190	6.00062	0.000694983	NA	5.89236	0.0936046	0.042	5.97213	0.29939	0.223	6.01443	0.426142	0.352
YKR036C	CAF4	5.03678	0.0649747	NA	4.89534	0.0527773	NA	4.47377	0.0928602	NA	4.05486	-0.0866119	NA
YKR042W	UTH1	9.59289	0.00518218	NA	9.65696	0.00656041	NA	9.85734	0.00612207	NA	10.1637	0.0117097	0.001
YKR043C	SHB17	7.6574	0.0522613	NA	7.71507	0.0632496	NA	7.74017	0.0034968	NA	7.42901	0.071521	0.016
YKR050W	TRK2	4.16037	-0.0301518	NA	4.01742	0.0128976	NA	3.72972	0.0698546	NA	3.45491	0.211016	0.068
YKR053C	YSR3	3.90746	-0.00793107	NA	4.01758	-0.0311435	NA	4.28748	0.0767797	0.009	4.28482	0.12309	0.049
YKR059W	TIF1	9.34784	0.0140549	NA	9.40755	0.0421178	0.012	9.6037	0.0849597	0.051	9.69967	0.176696	0.138
YKR061W	KTR2	4.1389	0.0411034	NA	4.20307	0.0728917	NA	3.86951	0.205127	0.091	3.84582	0.298639	0.172
YKR062W	TFA2	5.80604	0.0168275	NA	5.5951	0.0312382	NA	5.05151	0.0217574	NA	4.6421	0.125173	0.007
YKR063C	LAS1	5.10598	0.0295721	NA	4.85561	0.0311477	NA	4.13837	0.0670896	NA	4.04379	0.136973	NA
YKR064W	OAF3	5.77361	0.0315662	NA	5.65368	0.035845	NA	5.29676	0.0787037	NA	5.28851	0.0135129	NA
YKR067W	GPT2	5.73349	0.01935	NA	5.65013	0.0421106	NA	5.65121	0.0373782	NA	5.69689	0.0605676	0.024
YKR070W		6.35805	0.0259169	NA	6.28321	0.0305725	NA	6.227	0.000631871	NA	5.90411	0.0449343	NA
YKR071C	DRE2	6.7435	0.0195159	NA	6.7797	0.0415215	0.007	6.73764	0.0696636	0.033	6.8505	0.11503	0.081
YKR072C	SIS2	5.97434	0.0833883	NA	5.78967	0.273584	0.151	5.57764	0.51189	0.397	5.45086	0.58417	0.49
YKR076W	ECM4	4.26342	0.0212085	NA	4.18809	0.0324555	NA	4.06345	0.201344	0.082	3.65795	0.200869	0.067
YKR079C	TRZ1	5.30979	0.030157	NA	5.16798	0.0625327	NA	4.69008	0.0253393	NA	4.65494	0.112045	0.036
YKR080W	MTD1	8.98478	-0.00848982	NA	8.92056	0.00928839	NA	8.49513	0.0456669	NA	8.30613	0.0570667	0.019
YKR082W	NUP133	6.04675	0.00175973	NA	6.10507	0.00741867	NA	6.06034	0.0478423	0.028	5.99926	0.073342	0.047
YKR083C	NA	NA	NA	NA	3.87035	0.0577664	0.012	3.86846	0.203718	0.122	3.81077	0.30751	0.205
YKR086W	PRP16	5.67706	0.0475118	NA	5.52196	0.0867761	0.015	5.01102	0.125648	0.042	4.98659	0.0821755	NA
YKR090W	PXL1	5.35838	0.0324525	NA	5.14112	0.040182	NA	4.81369	0.0657239	0.019	4.49247	0.0561902	NA
YKR092C	SRP40	6.94223	0.00345014	NA	6.95719	0.0152186	NA	7.05451	0.0309317	0.01	7.18093	0.043721	0.026
YKR093W	PTR2	7.19426	-0.0105351	NA	7.21629	0.00123	NA	7.13497	-0.00504797	NA	6.70224	-0.00505393	NA
YKR094C	RPL40B	10.6007	-0.000744134	NA	10.6334	0.0118362	0.008	10.7202	0.0591791	0.047	10.7541	0.146849	0.125
YKR096W	ESL2	6.59556	0.000973024	NA	6.60389	0.00348605	NA	6.66861	0.0354746	0.021	6.79392	0.0611797	0.043
YKR098C	UBP11	4.03417	0.093839	NA	4.06805	0.174098	0.04	3.89929	0.329119	0.181	3.88	0.38144	0.242
YKR100C	SKG1	4.99085	0.00835301	NA	4.78985	-0.0951456	NA	4.25379	-0.0322639	NA	4.0636	0.015893	NA
YLL001W	DNM1	6.18983	0.0288988	NA	6.14787	0.0702429	0.018	5.71881	0.12084	0.069	5.65318	0.125355	0.08
YLL007C		4.56052	0.0413637	NA	4.36209	0.0984021	NA	3.97332	0.130986	0.021	3.80667	0.20076	0.073
YLL010C	PSR1	6.18763	0.0432677	NA	6.13375	0.12986	0.04	6.03591	0.216135	0.124	6.02591	0.282505	0.201
YLL011W	SOF1	4.00983	0.00137096	NA	3.89008	0.0746443	0.011	3.8519	0.180272	0.096	3.81201	0.293225	0.189
YLL013C	PUF3	5.75364	-0.0580116	NA	5.47362	-0.0230445	NA	5.27841	0.0697048	NA	5.26565	0.0939992	0.01
YLL014W	EMC6	6.13668	-0.00369352	NA	6.071	0.0476505	NA	5.87877	-0.0227944	NA	5.53179	-0.0173447	NA
YLL015W	BPT1	7.05852	0.00467616	NA	7.01083	0.00849902	NA	6.81453	0.0653311	0.042	6.57132	0.128086	0.093
YLL018C	DPS1	8.62398	0.000128756	NA	8.60483	0.00562818	NA	8.6213	0.0268162	0.014	8.56811	0.0429898	0.029
YLL019C/YLL020C	KNS1	4.1375	0.0102472	NA	4.23687	0.094656	0.028	4.32183	0.241459	0.158	4.71141	0.340888	0.267
YLL021W	SPA2	5.26955	-0.00393854	NA	5.30794	0.0448798	0.013	5.31352	0.161842	0.107	5.57234	0.30853	0.248
YLL024C	SSA2	11.0951	-0.00106104	NA	11.1505	0.00996679	0.007	11.0485	0.0769585	0.062	11.1973	0.256586	0.223
YLL025W	PAU17	3.25916	-0.0412246	NA	3.36257	0.035317	NA	3.28847	0.00530809	NA	3.33763	0.0937128	NA
YLL026W	HSP104	6.03017	0.00614986	NA	6.01197	0.0129977	NA	6.03367	0.0542916	0.031	6.86913	0.0855485	0.066
YLL028W	TPO1	7.11219	0.047103	NA	7.02511	0.0216467	NA	7.04165	-0.0603554	NA	7.44578	-0.113707	-0.059
YLL032C		5.5317	0.046014	NA	5.23813	0.0534058	NA	4.63706	0.0792854	NA	4.50881	0.0405676	NA
YLL039C	UBI4	6.27955	0.0333718	NA	6.18921	0.0386132	NA	6.2341	0.0354592	NA	6.82564	0.0389933	NA
YLL041C	SDH2	5.69735	0.0297356	NA	5.64821	0.0426124	NA	5.74982	0.0453749	NA	5.95761	0.0583836	0.016
YLL045C	RPL8B	10.6384	-0.000567484	NA	10.6791	0.000636699	NA	10.8547	0.0105413	0.007	10.9549	0.0176868	0.014
YLL048C	YBT1	5.81992	0.0160532	NA	5.92274	0.0430137	NA	5.99562	0.14853	0.079	6.06984	0.319056	0.243
YLL050C	NA	NA	NA	NA	9.17364	0.000183204	NA	9.34267	0.00352044	0.001	9.52585	0.00870999	0.006
YLL058W		4.52128	0.0212658	NA	4.51697	0.0821426	NA	4.43236	0.111637	0.028	4.53224	0.139766	0.056
YLL061W	MMP1	2.40275	0.0634044	NA	1.83671	-0.0964009	NA	1.65157	0.0221064	NA	1.27662	0.277574	NA
YLL063C	AYT1	3.45569	0.06578	NA	3.40567	0.173464	0.015	3.36673	0.32776	0.161	3.6909	0.406164	0.263
YLR001C		6.07728	-0.00440723	NA	5.86997	0.0204258	NA	5.49497	0.0649721	0.02	5.25889	0.051961	NA
YLR002C	NOC3	7.43056	0.0101294	NA	7.38488	0.088522	0.036	7.32245	0.220229	0.155	7.34907	0.313355	0.253
YLR003C	CMS1	6.55167	-0.00134728	NA	6.44076	0.0393401	0.018	6.07044	0.194237	0.142	6.01876	0.390774	0.324
YLR006C	SSK1	4.02432	0.107602	0.004	3.94682	0.271048	0.122	3.83242	0.318199	0.186	3.84472	0.366113	0.241
YLR007W	NSE1	4.70429	0.0212918	NA	4.59702	0.0487973	0.006	4.32934	0.100913	0.045	4.11263	0.136842	0.063
YLR008C	PAM18	6.68433	0.0130419	NA	6.59264	0.0512004	NA	6.29285	0.0941887	0.02	6.10635	0.156121	0.083
YLR010C	TEN1	3.65698	0.0115758	NA	3.254	0.178393	0.006	3.0582	0.259122	0.086	3.08932	0.246356	0.084
YLR011W	LOT6	5.04081	0.0186968	NA	4.85788	0.0435975	NA	4.38726	-0.0389247	NA	4.23563	-0.0158596	NA
YLR015W	BRE2	4.32923	0.0554864	NA	4.05757	0.136724	0.009	3.47458	0.0864271	NA	3.34068	0.105435	NA
YLR016C	PML1	4.56969	0.0177114	NA	4.33204	0.121315	0.009	3.89743	0.0857087	NA	3.7981	0.182353	0.049
YLR019W	PSR2	5.37699	0.0253356	NA	5.43631	0.0333998	NA	5.37279	0.067033	0.015	5.67678	0.0828691	0.038
YLR024C	UBR2	3.84287	-0.00671143	NA	3.52559	0.107235	NA	3.34075	0.3302	0.155	3.18832	0.392255	0.216
YLR025W	SNF7	6.57267	0.138653	0.039	6.45886	0.137138	0.05	6.39624	0.081031	0.011	6.37048	0.100421	0.037
YLR026C	SED5	5.01505	0.0143638	NA	4.9299	0.12724	0.02	4.58781	0.225063	0.105	4.64453	0.196103	0.086
YLR029C	RPL15A	10.1095	4.607e-05	NA	10.0898	0.00435103	0.002	10.128	0.0396397	0.032	9.98541	0.094632	0.08
YLR034C	SMF3	6.53419	0.00325193	NA	6.35273	-0.00730769	NA	5.96947	0.0207999	NA	5.83212	-0.0108843	NA
YLR035C	MLH2	4.27361	-0.0852387	NA	3.97031	-0.0118439	NA	3.59455	0.0653179	NA	3.51398	0.0680113	NA
YLR035C-A		9.22113	0.0873819	0.027	9.18147	0.0792295	0.024	9.37618	0.0711901	0.019	9.51256	0.0711045	0.03
YLR036C		4.29303	0.0511344	NA	4.09213	0.0809388	NA	3.42284	0.0773771	NA	3.05496	0.19149	0.016
YLR038C	COX12	6.68846	0.0125975	NA	6.68697	0.0475265	NA	6.69352	0.140259	0.077	6.61712	0.236491	0.182
YLR043C	TRX1	8.95157	0.00373433	NA	9.00075	0.00595921	0.001	9.04951	0.012269	0.006	9.21038	0.0264413	0.019
YLR045C	STU2	5.85905	0.0312734	NA	5.52489	0.0272443	NA	5.04014	0.0721501	NA	4.5865	0.0791877	NA
YLR046C		6.07657	0.0058614	NA	5.96244	0.157576	0.084	5.83958	0.412602	0.317	5.95112	0.597049	0.517
YLR048W	RPS0B	9.63218	0.00584325	NA	9.69597	0.0450615	0.03	9.75397	0.217725	0.174	9.67658	0.39308	0.34
YLR050C		5.23009	-0.00243367	NA	5.20291	0.00708972	NA	5.35286	0.101443	0.063	5.23721	0.168816	0.117
YLR056W	ERG3	6.7799	0.0135303	NA	6.78142	0.0152645	NA	6.64925	0.00874788	NA	6.30756	-0.0171557	NA
YLR058C	SHM2	10.6662	0.0472702	0.016	10.6834	0.0435199	0.014	10.7729	0.047871	0.017	10.7361	0.0791813	0.056
YLR059C	REX2	6.87932	0.0105272	NA	6.69765	0.00833685	NA	6.24381	-0.0532479	NA	5.76275	-0.0263877	NA
YLR060W	FRS1	7.67989	0.00316253	NA	7.73378	0.0234563	0.008	7.85995	0.142946	0.108	8.05234	0.321415	0.272
YLR065C	ENV10	5.99061	0.0969807	0.026	5.99295	0.101477	0.043	5.82219	0.0654248	0.008	5.47157	0.0524666	NA
YLR074C	BUD20	7.57546	0.0220802	NA	7.49079	0.0819765	0.011	7.25065	0.120013	0.049	7.14126	0.187873	0.121
YLR075W	RPL10	11.9358	3.50592e-05	NA	11.9995	0.000271504	NA	11.8941	0.00190289	0.001	11.7358	0.00674518	0.005
YLR077W	FMP25	5.55499	-0.00535098	NA	5.60117	0.00897485	NA	6.34864	0.0195553	0.007	6.55112	0.0326629	0.018
YLR079W	SIC1	6.04247	0.00619878	NA	5.98853	0.0172432	NA	6.01746	-0.0345204	NA	6.13673	-0.0954225	-0.033
YLR083C	EMP70	8.2342	0.00684488	NA	8.26213	0.042829	0.019	8.25806	0.136699	0.1	8.21111	0.207765	0.169
YLR086W	SMC4	5.79035	-0.00051854	NA	5.48462	0.0170703	NA	5.11181	-0.00122119	NA	4.9665	-0.0118574	NA
YLR087C	CSF1	5.51363	0.0092072	NA	5.48872	0.0448514	NA	5.13297	-0.000424123	NA	4.65959	0.107197	NA
YLR089C	ALT1	8.52207	0.0251028	NA	8.44251	0.0780955	0.031	8.15858	0.140774	0.089	7.89565	0.200624	0.15
YLR093C	NYV1	7.64067	0.0327097	NA	7.63572	0.07146	0.022	7.38187	0.0995052	0.053	7.35563	0.141822	0.103
YLR096W	KIN2	5.41289	-0.00106669	NA	5.29942	0.0580221	0.018	5.27637	0.290166	0.211	5.44959	0.363086	0.291
YLR100W	ERG27	5.76598	0.00559778	NA	5.76198	0.0177464	NA	5.71595	0.076884	0.043	5.51892	0.126128	0.08
YLR108C		5.84418	0.000734439	NA	5.77473	0.0124578	NA	5.68194	0.0280259	NA	5.61802	0.0789143	0.038
YLR109W	AHP1	12.6164	-0.000109197	NA	12.6273	0.000153196	NA	12.6765	0.00309501	0.002	12.4017	0.0313807	0.027
YLR110C	CCW12	13.0396	5.07604e-05	NA	13.0686	0.000315935	0	13.1358	0.00128112	0	13.0172	0.00238077	0.001
YLR112W		6.83081	0.0337699	NA	6.73677	-0.0432007	NA	6.60042	-0.14611	-0.081	6.42013	-0.212053	-0.156
YLR113W	HOG1	8.41243	0.00121942	NA	8.38702	0.00361661	0	8.10771	0.0201433	0.013	7.81394	0.0713206	0.054
YLR114C	AVL9	6.60558	-0.0282859	NA	6.44084	-0.0555856	NA	6.13955	-0.0108922	NA	5.77605	0.0342889	NA
YLR116W	MSL5	4.5904	0.0631488	NA	4.43758	-0.00194616	NA	4.06588	0.0566979	NA	4.00316	-0.00764804	NA
YLR117C	CLF1	5.50738	-0.00490083	NA	5.35687	0.0550159	NA	5.13422	0.134266	0.061	5.2216	0.238249	0.16
YLR118C		7.09011	0.0172689	NA	7.04988	-0.00266471	NA	6.9898	0.00713961	NA	6.59586	-0.0179943	NA
YLR119W	SRN2	5.03072	0.00453522	NA	4.85675	0.0417875	NA	4.58131	0.225354	0.114	4.52384	0.231248	0.126
YLR120C	YPS1	5.95562	0.0143671	NA	5.76229	0.0366066	NA	5.52157	0.0435597	NA	5.45088	0.0271371	NA
YLR126C		4.55094	0.125802	NA	4.47031	0.143853	0.023	4.40952	0.241921	0.115	4.26056	0.354432	0.232
YLR129W	DIP2	6.28577	-0.00169954	NA	6.14027	0.00437677	NA	6.06677	0.10198	0.066	5.90235	0.200934	0.148
YLR130C	ZRT2	8.94113	-0.00243672	NA	8.81398	0.0739122	0.034	8.37666	0.287299	0.226	8.21866	0.34651	0.292
YLR132C	USB1	4.75229	0.0389886	NA	4.1768	0.106182	NA	3.81947	0.0667238	NA	3.51848	0.0537144	NA
YLR133W	CKI1	4.25607	0.0388001	NA	3.98757	-0.00655395	NA	3.29548	-0.0386011	NA	2.73593	-0.0586876	NA
YLR137W	RKM5	4.18861	0.0277794	NA	4.07717	0.0648926	NA	3.87947	0.0953917	0.022	3.77421	0.221416	0.112
YLR143W	DPH6	6.49426	0.0130608	NA	6.18015	0.109432	0.032	5.58301	0.120602	0.039	5.34667	0.167036	0.078
YLR144C	ACF2	4.87151	-0.0157469	NA	4.71681	0.0721711	NA	4.18958	0.14102	0.029	3.93598	0.15285	0.024
YLR150W	STM1	10.4828	0.0136481	NA	10.5112	0.0460449	NA	10.6215	0.0512269	NA	10.7691	0.0767127	0.034
YLR151C	PCD1	3.3919	0.0316302	NA	3.38331	0.081085	NA	3.45779	0.136938	0.021	3.92326	0.201526	0.101
YLR152C		5.4254	0.0591225	NA	5.5257	0.253925	0.13	5.5411	0.499405	0.383	5.77092	0.543291	0.453
YLR153C	ACS2	9.81698	0.00660258	NA	9.78819	0.00918355	0	9.77894	0.0205171	0.011	9.6766	0.0489235	0.037
YLR154C	RNH203	6.02168	0.0100566	NA	5.87755	0.02405	0.003	5.4586	0.0765645	0.039	5.17592	0.155345	0.092
YLR155C	ASP3-1	7.6389	0.0206013	NA	7.5659	0.0221142	NA	7.54466	0.00487721	NA	7.33756	0.0109685	NA
YLR157C	ASP3-2	7.64114	-0.00114161	NA	7.59641	0.0296569	NA	7.54389	-0.0066409	NA	7.3105	-0.0210083	NA
YLR157C-A/YLR157C-B		9.43764	0.0851518	0.02	9.4122	0.0857969	0.022	9.63176	0.0402576	NA	9.75605	0.0408013	NA
YLR158C	ASP3-3	7.6335	0.00807071	NA	7.61682	0.0248605	NA	7.59638	-0.00569953	NA	7.39179	-0.0194002	NA
YLR160C	ASP3-4	7.60341	-0.00439364	NA	7.56834	0.0280578	NA	7.55975	-0.00895132	NA	7.32476	-0.0118001	NA
YLR162W-A	RRT15	3.38521	0.0948663	NA	2.96972	0.256231	0.05	2.2675	0.321605	0.092	2.43938	0.229988	0.012
YLR167W	RPS31	12.2212	0.000364731	NA	12.2838	0.00199889	0	12.256	0.00511738	0.003	12.1153	0.0129965	0.01
YLR170C	APS1	8.0364	-0.00425212	NA	7.79001	-0.0223927	NA	7.28332	-0.128956	-0.085	7.17562	-0.225106	-0.174
YLR174W	IDP2	3.7841	0.0163854	NA	3.82099	0.132173	0.037	3.72172	0.404796	0.27	3.89245	0.558419	0.439
YLR175W	CBF5	8.1143	0.0333116	0.004	8.0569	0.137794	0.092	8.11162	0.354156	0.288	8.23136	0.49385	0.437
YLR177W		5.25798	0.00212429	NA	5.26555	0.0187003	NA	5.28521	0.151448	0.1	5.51887	0.296611	0.238
YLR178C	TFS1	5.73505	0.00316645	NA	5.78656	0.0141977	NA	5.96723	0.0807747	0.054	6.0541	0.156316	0.121
YLR180W	SAM1	9.30052	0.00607436	NA	9.35341	0.0133636	NA	9.32005	-0.00428659	NA	9.07348	-0.00161262	NA
YLR182W	SWI6	6.23859	0.018096	0.002	6.02961	0.0363754	0.015	5.854	0.0935297	0.06	5.9255	0.17966	0.135
YLR185W	RPL37A	11.187	0.00309566	NA	11.2013	0.014093	0.008	11.2539	0.0423719	0.032	11.1257	0.0980173	0.082
YLR186W	EMG1	7.71598	-0.00284237	NA	7.61251	0.0162396	0.004	7.35548	0.0726555	0.05	7.18887	0.11863	0.09
YLR188W	MDL1	6.15752	0.0705731	NA	6.12045	0.0846795	0.005	5.90768	0.0350874	NA	5.58868	0.130771	0.051
YLR189C	ATG26	4.68621	0.0732567	NA	4.74196	0.0535235	NA	4.62742	0.0386953	NA	4.50906	0.186855	0.09
YLR191W	PEX13	5.36698	0.00979263	NA	5.18725	0.0829665	0.009	4.79552	0.225085	0.118	4.56352	0.262188	0.147
YLR192C	HCR1	8.41762	0.000289998	NA	8.37375	0.0159004	0.001	8.25519	0.113107	0.083	8.13163	0.244503	0.203
YLR195C	NMT1	6.03216	0.0205809	NA	5.89571	0.0744679	NA	5.64318	0.151316	0.066	5.06245	0.295271	0.181
YLR196W	PWP1	5.83791	-0.0112843	NA	5.83262	0.0865859	0.027	5.88138	0.359078	0.272	5.98966	0.523458	0.45
YLR200W	YKE2	7.08005	0.0454392	NA	7.06352	0.0332518	NA	6.97765	0.0308008	NA	6.55972	0.118741	0.07
YLR201C/YLR202C	COQ9	6.68909	0.00124304	NA	6.72417	0.00363945	NA	6.88849	0.0217577	0.012	7.27737	0.0338063	0.024
YLR205C	HMX1	1.95259	-0.142828	NA	2.17367	0.099576	NA	2.64819	0.331559	0.134	2.88131	0.54301	0.345
YLR206W	ENT2	5.54814	0.00629559	NA	5.59474	0.0216552	0.004	5.43788	0.157416	0.108	5.61435	0.263612	0.208
YLR208W	SEC13	7.83859	0.0314897	NA	7.82946	0.127027	0.072	7.83416	0.421831	0.346	7.73214	0.681555	0.624
YLR209C	PNP1	6.51823	0.00906036	NA	6.45554	0.0939487	0.026	6.243	0.242688	0.157	5.92447	0.421662	0.334
YLR214W	FRE1	6.55026	-0.0046185	NA	6.58643	0.00867069	NA	6.55238	0.0693875	0.047	6.55978	0.121983	0.093
YLR219W	MSC3	5.4236	0.0301743	NA	5.24846	0.056275	0.001	4.68834	0.163814	0.076	4.68651	0.225141	0.129
YLR222C	UTP13	7.67974	0.00743161	NA	7.59821	0.0512762	0.02	7.33483	0.238386	0.182	7.33547	0.329893	0.277
YLR227C	ADY4	3.11988	-0.0184233	NA	2.94558	-0.00850652	NA	2.68701	-0.0744601	NA	2.79471	0.0861641	NA
YLR227W-A/YLR227W-B		9.25444	0.0655556	0.004	9.27411	0.0492646	NA	9.42589	0.0209189	NA	9.56048	0.037283	NA
YLR231C	BNA5	6.00167	0.0486089	NA	6.03665	0.104059	0.033	5.89022	0.253271	0.166	5.68536	0.423732	0.334
YLR239C	LIP2	5.74297	0.00597024	NA	5.71546	0.0406922	0.007	5.5974	0.0866601	0.044	5.72879	0.104734	0.063
YLR240W	VPS34	4.24391	-0.00884764	NA	3.98333	0.0630114	NA	3.52455	0.0413344	NA	3.46953	0.0427369	NA
YLR241W	CSC1	6.27162	-0.0134958	NA	6.18652	0.0303206	NA	5.9799	0.0413433	NA	5.75449	0.108951	0.048
YLR243W	GPN3	6.198	0.00418748	NA	6.08068	0.079413	NA	5.87437	0.125947	0.045	5.73757	0.158096	0.08
YLR244C	MAP1	8.19012	0.0112332	NA	8.17055	0.0573287	0.036	8.21683	0.156171	0.121	8.17459	0.292158	0.247
YLR248W	NA	NA	NA	NA	NA	NA	NA	7.0122	0.0193943	0.01	7.28061	0.0811239	0.064
YLR249W	YEF3	11.0869	-0.000248213	NA	11.1404	0.0003422	NA	11.102	0.0149535	0.011	11.1785	0.0538489	0.045
YLR251W/YLR252W	SYM1	4.60656	0.0203289	NA	4.68569	0.161951	0.066	4.55859	0.380813	0.263	4.95419	0.47187	0.377
YLR253W	NA	NA	NA	NA	7.64303	-0.000421247	NA	7.59595	0.0130332	0.006	7.66884	0.0274409	0.018
YLR254C	NDL1	4.84205	0.000114104	NA	4.71168	0.0498812	0.009	4.53575	0.156494	0.088	4.60449	0.211472	0.136
YLR257W		6.71981	0.00809693	NA	6.74637	0.0231744	0.006	6.54116	0.025895	0.009	6.36294	0.057966	0.031
YLR259C	HSP60	9.04321	0.0186181	NA	9.06108	0.0404491	NA	9.10045	0.0870271	0.032	8.94301	0.266788	0.209
YLR260W	LCB5	4.7492	0.0132197	NA	4.78276	0.0749388	0.015	4.77325	0.0726891	0.018	5.19927	0.0966685	0.048
YLR261C/YLR262C	VPS63/YPT6	5.68438	0.0344201	NA	5.49514	0.109957	0.033	4.9936	0.064027	NA	4.87312	0.152742	0.08
YLR262C-A	TMA7	7.27935	0.0049721	NA	7.24511	0.0465516	0.02	7.26189	0.116616	0.08	7.2768	0.107835	0.076
YLR266C	PDR8	5.1346	0.00114034	NA	4.88151	-0.0106735	NA	4.44349	0.0329545	NA	4.14819	0.0293197	NA
YLR268W	SEC22	6.78137	0.000958212	NA	6.71063	0.0625065	0.028	6.52694	0.230763	0.17	6.0997	0.54974	0.469
YLR274W	MCM5	5.21722	0.0133643	NA	5.18674	0.0705649	0.02	4.84248	0.112078	0.053	4.98343	0.110212	0.055
YLR277C	YSH1	6.04925	0.00669678	NA	5.94144	0.0492028	0.006	5.69606	0.0759554	0.027	5.72883	0.0859392	0.039
YLR278C		4.52701	0.075064	NA	4.50815	0.140266	0.022	4.36824	0.310114	0.18	4.3734	0.381928	0.275
YLR284C	ECI1	3.78135	-0.00313288	NA	3.94588	0.0209186	NA	4.73372	0.15275	0.094	4.91842	0.190718	0.135
YLR285C-A		2.22106	0.0997552	NA	3.06769	0.21452	0.039	3.93592	0.281349	0.129	4.32923	0.276933	0.148
YLR285W	NNT1	7.01857	-0.0127415	NA	6.98984	0.0123813	NA	6.6776	-0.00953662	NA	6.11753	0.0398189	NA
YLR287C		6.17508	0.0321473	NA	5.99051	0.0703619	0.018	5.42654	0.0836949	0.029	5.22818	0.111155	0.058
YLR290C		5.18644	0.0029966	NA	5.06578	0.0703175	NA	5.0356	0.283217	0.184	5.08902	0.492245	0.397
YLR291C	GCD7	6.93778	0.0284004	NA	6.98607	0.0566011	NA	6.96896	0.15067	0.081	7.35724	0.216444	0.16
YLR293C	GSP1	10.6125	-0.00538127	NA	10.6349	0.0478221	0.018	10.6588	0.177668	0.13	10.6585	0.367072	0.315
YLR300W	EXG1	9.26527	0.00607538	NA	9.28689	0.028075	0.013	9.08269	0.0860937	0.062	8.94133	0.118032	0.093
YLR301W	HRI1	8.6448	-0.0026163	NA	8.62987	-0.00134011	NA	8.58195	-0.00296486	NA	8.45971	-0.0016912	NA
YLR304C	ACO1	9.71448	-0.00537513	NA	9.72605	0.0231044	NA	9.71019	0.0570576	NA	9.90396	0.172836	0.122
YLR305C	STT4	6.36384	0.0257593	NA	6.34831	0.0988778	0.019	6.14273	0.106048	0.029	6.11279	0.259074	0.183
YLR306W	UBC12	4.53274	0.139664	0.006	4.40239	0.125189	0.008	3.88193	0.223296	0.079	3.52215	0.213247	0.052
YLR309C	IMH1	5.13285	0.0133798	NA	5.04056	0.0914886	NA	4.94818	0.192292	0.09	4.79517	0.248063	0.137
YLR312W-A	MRPL15	6.63885	0.0245754	NA	6.61993	0.0332142	NA	6.41937	0.0478341	NA	6.53991	0.0232332	NA
YLR317W		3.97406	0.00150143	NA	3.78504	0.0436582	NA	3.59979	0.0567533	NA	3.66754	0.00322416	NA
YLR318W	NA	NA	NA	NA	3.41596	0.0793251	0.017	3.53577	0.256619	0.161	3.63277	0.271896	0.185
YLR324W	PEX30	4.27509	0.0489619	NA	4.12355	0.0651739	NA	3.92642	0.0612596	NA	3.86844	0.152461	0.031
YLR325C	RPL38	11.0165	0.0420521	0.015	11.0031	0.0649427	0.038	11.051	0.0608401	0.034	11.0062	0.0759153	0.054
YLR329W	NA	NA	NA	NA	NA	NA	NA	2.30223	-0.0126429	NA	2.5494	0.106841	NA
YLR330W	CHS5	6.58018	-0.000280283	NA	6.51412	0.0661191	0.033	6.65254	0.202909	0.151	6.73364	0.348017	0.288
YLR333C	RPS25B	9.94715	0.0185418	NA	9.98535	0.0259258	NA	10.0744	0.0234025	NA	10.0191	0.0617709	0.04
YLR340W	RPP0	10.9511	-0.000319049	NA	11.0986	0.00130003	0	11.3264	0.0130889	0.01	11.3261	0.0353312	0.03
YLR343W	GAS2	2.2117	0.0444964	NA	2.47969	0.10468	NA	2.96957	0.0821628	NA	3.22161	0.192669	0.072
YLR344W	RPL26A	10.7522	0.0232381	NA	10.7002	0.0449453	0.01	10.5317	0.0616409	0.024	10.2195	0.154288	0.115
YLR345W		5.98762	0.0211615	NA	6.08297	0.034524	0.004	6.10569	0.0419484	0.013	6.22469	0.0520412	0.024
YLR347C	KAP95	5.75825	-0.0585393	NA	5.53154	-0.0526907	NA	4.8579	-0.027437	NA	4.48133	-0.0587181	NA
YLR352W		5.00566	0.000545875	NA	4.89011	0.0849198	NA	4.62735	0.0394967	NA	4.41923	0.0684332	NA
YLR353W	BUD8	5.44914	-0.0109787	NA	5.40711	0.00540045	NA	5.25863	0.0620189	0.015	5.20722	0.0649466	0.02
YLR355C	ILV5	11.4241	0.0119561	NA	11.3879	0.0415033	0.025	11.1875	0.093106	0.069	10.9698	0.101652	0.081
YLR356W	ATG33	5.49197	-0.0226768	NA	5.47931	0.00206429	NA	5.22379	-0.010145	NA	4.97954	0.00593464	NA
YLR362W	STE11	3.47776	-0.0150965	NA	3.34159	0.0525419	NA	3.39157	0.318474	0.169	3.42628	0.380627	0.238
YLR364W	GRX8	4.15675	-0.0207368	NA	4.20126	0.00852901	NA	4.34284	-0.00229996	NA	4.47575	-0.0114357	NA
YLR367W	RPS22B	8.80567	0.00135282	NA	8.85741	0.0122906	0.005	8.90509	0.0801088	0.062	8.79037	0.182847	0.154
YLR368W	MDM30	5.10398	0.0405903	NA	4.95668	0.0608223	NA	4.5802	0.164953	0.078	4.57426	0.221739	0.127
YLR371W	ROM2	6.81279	0.029392	NA	6.85195	0.0808105	0.039	6.77717	0.100614	0.061	6.82053	0.129901	0.095
YLR372W	ELO3	9.07241	0.0258749	NA	9.08662	0.0777337	0.014	8.93872	0.157176	0.09	8.606	0.231471	0.173
YLR373C	VID22	4.6148	0.00608594	NA	4.47144	0.101008	0.013	4.42297	0.169055	0.072	4.48449	0.214176	0.116
YLR378C	SEC61	8.70267	0.00107754	NA	8.72956	0.00392772	NA	8.79324	-0.0223645	-0.008	8.82583	-0.0182842	-0.006
YLR380W	CSR1	6.94825	-0.0042584	NA	6.96209	0.0158203	NA	6.70824	0.00586693	NA	6.42013	0.0576168	NA
YLR382C	NAM2	4.4454	0.00242144	NA	4.31014	0.178624	0.045	4.31173	0.317115	0.174	4.42467	0.37699	0.257
YLR384C	IKI3	7.59754	8.71136e-05	NA	7.58552	0.0122797	NA	7.47036	0.0354767	0.018	7.32629	0.0663381	0.045
YLR388W	RPS29A	9.57945	-0.000593757	NA	9.624	0.00136919	NA	9.65675	0.00407726	0.002	9.66093	0.00813285	0.005
YLR390W-A	CCW14	8.31403	0.00647953	NA	8.38445	0.0213158	NA	8.41369	0.0380251	NA	8.40017	0.0896978	0.043
YLR392C	ART10	4.35241	0.0322488	NA	4.41281	0.238107	0.095	4.39529	0.32312	0.193	4.4962	0.478199	0.36
YLR395C	COX8	7.59499	0.0102626	NA	7.6485	0.0214901	NA	7.57329	0.0288135	0.007	7.44859	0.0188556	NA
YLR396C	VPS33	5.69495	0.0427874	NA	5.44943	0.0764224	NA	4.8488	0.187867	0.081	4.81754	0.150683	0.054
YLR398C	SKI2	6.35586	0.0103441	NA	6.20453	0.0165401	NA	5.87085	0.0475049	NA	5.69151	0.0519715	NA
YLR399C	BDF1	6.63005	0.0309672	NA	6.5055	0.0236547	NA	6.47136	0.0352681	NA	6.48871	0.0235941	NA
YLR404W	FLD1	4.29649	0.0226388	NA	3.98843	0.00937834	NA	3.36947	-0.0080471	NA	2.97208	-0.0477766	NA
YLR406C	RPL31B	10.2695	0.0240662	NA	10.2802	0.0276561	0.005	10.279	0.00188307	NA	9.89718	0.0184763	NA
YLR410W	VIP1	6.49974	-0.00477393	NA	6.43686	0.0710165	0.038	6.38515	0.304545	0.238	6.42489	0.363243	0.302
YLR410W-A/YLR410W-B		5.42762	0.066879	NA	5.43192	0.00541592	NA	5.45344	0.0452741	NA	5.56723	0.0735277	NA
YLR411W	NA	NA	NA	NA	1.89994	0.18593	0.017	2.18346	0.209912	0.075	2.43761	0.236911	0.107
YLR412W	BER1	5.34769	0.0531179	NA	5.16656	0.0668875	NA	4.7445	0.0435062	NA	4.32622	0.0442535	NA
YLR417W	VPS36	4.99757	0.0422356	NA	4.78422	0.0750931	NA	4.54129	-0.00110113	NA	4.59585	-0.00932402	NA
YLR418C	CDC73	5.95799	-0.00567983	NA	5.80531	0.00757659	NA	5.312	0.0330646	NA	5.17894	0.0161256	NA
YLR419W		5.27946	-0.00115018	NA	5.16959	0.0124154	NA	4.74679	-0.0352918	NA	4.73533	0.00673493	NA
YLR422W		5.8821	0.00140606	NA	5.83486	0.067199	0.012	5.33384	0.0913423	0.027	5.25115	0.121819	0.053
YLR429W	CRN1	8.64415	0.00924963	NA	8.54274	0.0416944	0.025	8.31802	0.198788	0.159	8.04713	0.549655	0.489
YLR432W	IMD3	10.1427	0.000861963	NA	10.1893	0.00264074	NA	10.0947	0.0134584	0.002	9.74316	0.043465	0.03
YLR435W	TSR2	6.35697	0.00603228	NA	6.35549	0.0213701	0.005	6.30796	0.0776775	0.051	6.27401	0.117585	0.085
YLR436C	ECM30	5.99608	0.0309146	NA	6.0256	0.0734784	0.036	6.09373	0.167476	0.117	6.09102	0.292573	0.236
YLR438C-A	LSM3	7.26819	0.0256322	NA	7.21207	0.0249715	NA	7.14635	-0.0236883	NA	6.89356	-0.056785	NA
YLR438W	CAR2	3.67486	-0.0246184	NA	3.53968	-0.0461878	NA	3.37987	-0.0157578	NA	2.96103	0.116572	NA
YLR440C	SEC39	5.89108	0.0194894	NA	5.79932	0.0503004	NA	5.47619	0.0655062	NA	5.23079	0.128607	0.053
YLR441C	RPS1A	9.84409	0.0446523	0.013	9.89865	0.0502383	0.02	10.0002	0.0434997	0.016	10.0529	0.0994895	0.077
YLR442C	SIR3	5.59543	-0.0115879	NA	5.46425	0.037372	NA	5.10067	0.168669	0.1	4.95614	0.193427	0.119
YLR446W		4.53215	0.00826255	NA	4.37979	0.0206034	NA	3.79575	0.0519811	NA	3.69418	0.0247286	NA
YLR448W	RPL6B	9.99256	0.0175738	NA	10.0046	0.0245123	NA	10.0503	0.00644107	NA	9.95349	-0.016109	NA
YLR449W	FPR4	6.23372	-0.00223117	NA	6.23686	0.00993213	NA	6.36524	0.105859	0.075	6.72275	0.20943	0.172
YLR451W	LEU3	5.05424	0.021924	NA	4.85134	0.135363	0.054	4.47727	0.407524	0.28	4.2972	0.439508	0.315
YLR452C	SST2	7.34023	0.00211197	NA	7.0324	-0.0163221	NA	6.44157	0.00170021	NA	6.23834	-0.0117297	NA
YLR456W		4.80931	0.0393015	NA	4.62576	0.0329287	NA	4.50148	0.0400607	NA	4.34706	0.0399062	NA
YLR459W	GAB1	6.81521	0.00232291	NA	6.70054	0.0272776	NA	6.21635	0.0381557	NA	5.97881	0.0499569	NA
YLR466C-B		3.67338	0.0454695	NA	3.5421	0.119891	NA	3.57776	0.118068	NA	3.79454	0.166549	0.041
YML001W	YPT7	7.09794	-0.000913041	NA	7.06229	0.00930622	NA	6.82579	0.0342752	0.017	6.56546	0.0694712	0.043
YML002W		4.08179	0.113643	NA	4.21435	0.210517	0.064	4.1022	0.35678	0.213	4.23536	0.370796	0.249
YML004C	GLO1	8.01519	0.0146279	NA	8.08602	0.0316455	0.015	8.06765	0.143425	0.109	7.99664	0.314899	0.266
YML006C	GIS4	4.9583	-0.00503189	NA	4.95241	0.093265	0.038	4.9734	0.235984	0.162	5.11542	0.349284	0.276
YML007W	YAP1	7.15342	0.00275995	NA	7.18214	0.0195429	0.009	7.24222	0.0859521	0.063	7.63847	0.161267	0.134
YML009C	MRPL39	7.7649	0.0118309	NA	7.79702	0.139424	0.055	7.85697	0.331421	0.247	8.14267	0.441777	0.377
YML009W-B/YML010W	SPT5	5.23496	0.0338568	NA	5.13418	0.121293	0.034	5.17801	0.381069	0.275	5.26062	0.576439	0.487
YML015C	TAF11	4.73588	-0.0475332	NA	4.71572	-0.033401	NA	4.85038	-0.0553832	NA	5.21575	-0.0578937	NA
YML016C	PPZ1	4.8857	0.0495425	NA	5.10436	0.19769	0.082	5.48216	0.463543	0.346	5.79978	0.61145	0.518
YML017W	PSP2	7.38507	0.0263105	NA	7.24763	0.0387023	NA	6.83468	0.179051	0.114	6.60129	0.33933	0.266
YML018C		6.15312	0.131772	0.027	6.15598	0.158276	0.062	6.17275	0.0354715	NA	6.27203	-0.0917986	-0.028
YML022W	APT1	8.25172	-0.00156183	NA	8.24514	0.00989934	NA	8.09617	0.022046	NA	7.70937	0.0393437	NA
YML023C	NSE5	5.57117	0.00217276	NA	5.58257	0.00841146	NA	5.30461	0.110477	0.052	5.40338	0.258153	0.185
YML024W	RPS17A	11.3611	-0.00355595	NA	11.433	0.0280499	NA	11.5098	0.0578256	0.009	11.5517	0.158669	0.115
YML026C	RPS18B	10.2313	0.0298886	0.01	10.3087	0.0474856	0.028	10.4253	0.0792889	0.058	10.3713	0.174557	0.15
YML027W	YOX1	5.15414	0.0512828	NA	4.97517	0.146408	0.066	4.57737	0.244308	0.146	4.53654	0.372898	0.259
YML032C	RAD52	5.82325	0.0418241	NA	5.86063	0.0876156	0.032	5.80884	0.122042	0.071	5.83574	0.0888968	0.044
YML035C	AMD1	7.36204	0.0377771	NA	7.23139	0.0720369	0.01	6.74494	0.0868801	0.023	6.46663	0.1614	0.094
YML036W	CGI121	6.77914	-0.0186375	NA	6.66053	-0.00862088	NA	6.0544	-0.000649396	NA	5.62918	0.0105938	NA
YML039W/YML040W		9.31053	0.00505787	NA	9.29398	0.0118844	0.002	9.50008	0.00166681	NA	9.62283	0.0047483	NA
YML043C	RRN11	4.30455	-0.00748683	NA	4.24439	-0.0141391	NA	4.26239	-0.0371291	NA	4.31584	-0.040232	-0.008
YML045W/YML045W-A		9.3819	0.0832723	0.015	9.35757	0.0796927	0.015	9.52571	0.0773791	0.013	9.65225	0.0565001	0.004
YML048W	GSF2	7.59567	0.00143005	NA	7.53287	-0.00215953	NA	7.3361	0.00310247	NA	6.95278	0.00159048	NA
YML055W	SPC2	6.06016	-0.00965789	NA	6.02483	0.00859309	NA	5.89895	0.0812122	0.048	5.72191	0.202277	0.146
YML056C	IMD4	10.8639	-0.000113624	NA	10.9188	0.000321698	NA	10.9029	0.00384224	0.002	10.8769	0.0107474	0.008
YML057W	CMP2	6.9162	0.00985045	NA	6.87699	0.0317151	0.012	6.63099	0.113366	0.078	6.68716	0.168821	0.13
YML059C	NTE1	6.06488	0.0250556	NA	6.05675	0.050472	NA	6.14314	0.154273	0.097	6.39472	0.203501	0.156
YML060W	OGG1	5.31404	0.0114348	NA	5.19811	-0.0110734	NA	5.17481	0.0293215	NA	5.08765	0.0598448	0.025
YML063W	RPS1B	11.4513	6.54825e-05	NA	11.5452	0.000226415	NA	11.6025	0.00108223	0	11.555	0.00253949	0.001
YML064C	TEM1	6.69255	0.0275065	NA	6.45792	0.0508004	0.014	6.11014	0.0795418	0.038	5.95092	0.0886652	0.044
YML071C	COG8	6.13546	0.000915535	NA	5.81582	0.0299642	0.005	5.54921	0.037405	0.01	5.2935	0.0986791	0.05
YML073C	NA	NA	NA	NA	NA	NA	NA	10.3869	0.0012099	0	10.3744	0.00439917	0.003
YML074C	NA	NA	NA	NA	7.54611	0.00106117	NA	7.60119	0.0105714	0.005	7.77529	0.0286852	0.019
YML076C	WAR1	5.75486	0.0604405	NA	5.7387	0.133479	0.045	5.70309	0.0851267	0.013	5.60243	0.195927	0.117
YML078W	CPR3	8.13017	0.00410286	NA	8.04965	0.011822	0.003	8.04007	0.036931	0.025	7.91653	0.0592959	0.044
YML085C	TUB1	7.48335	0.00175257	NA	7.53151	-0.000201816	NA	7.65361	-0.00836067	NA	7.58266	-0.0183493	NA
YML086C	NA	NA	NA	NA	NA	NA	NA	5.63656	0.0465205	0.026	5.77183	0.13029	0.096
YML088W	UFO1	4.61778	0.00515231	NA	4.37486	0.107278	0.034	4.37708	0.2907	0.191	4.57272	0.45088	0.354
YML093W	UTP14	5.9688	0.0160481	NA	5.88296	0.129344	0.038	5.96183	0.245244	0.156	6.16601	0.281549	0.207
YML096W		5.19464	0.0571168	NA	4.99318	0.0857226	NA	4.5906	0.0418869	NA	4.1793	-0.00401919	NA
YML099C	ARG81	5.13551	0.0638792	NA	5.02667	0.164152	0.054	4.73363	0.392128	0.263	4.847	0.451981	0.344
YML103C	NUP188	7.23572	0.00103867	NA	7.21517	0.0174676	0.005	7.20606	0.0928659	0.068	7.08413	0.192099	0.155
YML106W	URA5	9.37264	0.00175905	NA	9.3586	0.00623764	NA	9.06736	-0.0929361	-0.046	8.66373	-0.127364	-0.084
YML107C	PML39	3.99882	0.0843225	NA	3.69176	0.0584241	NA	3.19818	-0.0335258	NA	3.4112	0.0628712	NA
YML109W	ZDS2	4.51098	-0.00776329	NA	4.27705	0.0771499	0.015	3.86326	0.277265	0.158	4.20774	0.259305	0.166
YML110C	COQ5	8.00329	3.58557e-05	NA	8.03605	0.0132021	NA	8.01898	-0.00110576	NA	7.90733	0.00218226	NA
YML111W	BUL2	5.1151	-0.00887971	NA	5.05666	0.0817627	0.028	4.86737	0.306703	0.211	4.97822	0.345736	0.264
YML115C	VAN1	7.89661	0.0553633	NA	7.95497	0.11304	0.039	7.90693	0.246795	0.176	7.54418	0.245674	0.188
YML116W	ATR1	6.25453	0.0269126	NA	6.22615	0.149097	0.075	6.01524	0.347018	0.257	5.93349	0.459863	0.378
YML116W-A/YML117W	NAB6	6.7614	0.0171889	NA	6.6696	0.0904152	0.027	6.54276	0.26576	0.184	6.46916	0.3705	0.295
YML121W	GTR1	6.67137	0.00730907	NA	6.60953	0.0646063	0.034	6.42661	0.211619	0.157	6.47809	0.241946	0.193
YML129C	COX14	6.80797	-0.00422555	NA	6.62487	0.0830782	0.025	6.39049	0.255886	0.175	6.09521	0.305278	0.227
YML130C	ERO1	6.93609	0.00208676	NA	6.93078	0.0175475	0.005	7.0441	0.144558	0.11	7.76454	0.245295	0.207
YML131W		4.50124	0.0834815	NA	4.4777	0.137241	0.028	4.4285	0.170921	0.068	4.41767	0.310952	0.2
YML132W	COS3	6.34341	0.00163286	NA	6.3641	0.0162666	0.004	6.26571	0.0479779	0.029	5.86322	0.125115	0.086
YMR001C	CDC5	6.67928	0.0248524	NA	6.51489	0.095988	0.052	6.16881	0.167762	0.113	6.10271	0.230126	0.172
YMR004W	MVP1	4.48815	0.0108228	NA	4.46234	0.00739398	NA	4.5271	0.0330904	NA	5.00878	0.112313	0.071
YMR005W	TAF4	6.21829	0.00317872	NA	6.10921	0.0469934	0.02	5.88744	0.14812	0.102	5.88142	0.234498	0.179
YMR008C	PLB1	7.45811	0.0157797	NA	7.40492	0.024009	NA	7.13265	0.0157808	NA	6.60709	0.0774449	0.012
YMR010W		5.86385	0.0171356	NA	5.63761	0.0678456	0.012	5.11838	0.0871578	0.022	4.66542	0.180864	0.08
YMR011W	HXT2	5.94446	-0.00367472	NA	5.98849	0.0147321	NA	6.04953	0.0686627	0.038	5.70629	0.17587	0.124
YMR012W	CLU1	7.86766	0.0168072	NA	7.78096	0.0246629	0.006	7.805	0.0403085	0.019	7.86775	0.105609	0.083
YMR013C/YMR013C-A	SEC59	5.34889	0.0387269	NA	5.12492	0.0593016	NA	4.67082	0.0270249	NA	4.46734	0.00308291	NA
YMR014W	BUD22	6.05564	0.000825951	NA	5.94246	0.10741	0.062	5.73637	0.584723	0.487	5.97428	0.732311	0.66
YMR019W	STB4	5.06579	0.0726657	NA	4.98828	0.102773	0.021	4.58019	0.203746	0.098	4.50098	0.263981	0.156
YMR022W	UBC7	6.59968	-0.0020375	NA	6.49361	0.0366773	0.015	6.23229	0.0879612	0.055	6.02419	0.139228	0.095
YMR029C	FAR8	5.22615	-0.0103976	NA	5.20698	-0.00249688	NA	4.9934	0.0421753	0.004	4.66437	0.0481983	NA
YMR031C	EIS1	5.12983	-0.00246058	NA	5.07444	0.0567815	0.018	5.13517	0.116637	0.07	5.58662	0.273888	0.214
YMR033W	ARP9	6.81878	0.0300924	NA	6.80187	0.0987834	0.038	6.69775	0.220096	0.149	6.61854	0.296074	0.232
YMR035W	IMP2	4.31964	0.103514	NA	4.22272	0.022665	NA	3.9728	-0.0285511	NA	4.00879	-0.0487615	NA
YMR038C	CCS1	8.01069	0.0856366	0.012	7.89101	0.0585291	NA	7.62539	0.0226481	NA	6.95112	0.0646929	NA
YMR043W	MCM1	6.85413	0.0250684	NA	6.87784	0.200837	0.11	7.01195	0.334849	0.258	7.30102	0.365616	0.306
YMR044W	IOC4	5.27807	0.0073419	NA	5.22301	0.0095877	NA	5.09012	-0.003458	NA	4.80352	-0.017727	-0.004
YMR045C/YMR046C		9.36904	0.0746554	0.013	9.37158	0.0655469	0.006	9.54397	0.0743661	0.019	9.62543	0.0660634	0.021
YMR049C	ERB1	7.29538	0.0371247	NA	7.19295	0.131287	0.057	7.18989	0.298068	0.218	7.10641	0.402544	0.334
YMR050C/YMR051C		9.22724	0.0831957	0.026	9.19136	0.0890451	0.032	9.394	0.0667693	0.015	9.53298	0.0710527	0.03
YMR054W	STV1	6.65999	0.0119548	NA	6.55403	0.0241191	NA	6.18379	0.000345634	NA	5.8476	-0.00608421	NA
YMR061W	NA	NA	NA	NA	5.97273	0.0109127	NA	6.28423	0.0576387	0.039	6.50809	0.108452	0.086
YMR062C	ARG7	7.91362	0.00256545	NA	7.87013	0.0523023	0.031	7.76961	0.309966	0.253	7.692	0.540068	0.479
YMR064W	AEP1	5.46627	0.0270932	NA	5.34816	0.109	0.016	5.11819	0.154873	0.057	5.28444	0.0993323	0.02
YMR066W	SOV1	4.54443	-0.0140245	NA	4.52092	0.0965903	0.031	4.68007	0.228752	0.148	4.95612	0.296297	0.219
YMR067C	UBX4	5.64407	0.0456029	NA	5.54652	0.222134	0.102	5.63359	0.365757	0.258	6.01126	0.441345	0.358
YMR070W	MOT3	6.26231	0.0813177	NA	6.27812	0.254921	0.147	6.4143	0.274873	0.187	6.60572	0.291874	0.222
YMR073C	IRC21	6.39114	0.0422831	NA	6.2257	0.0312984	NA	5.72822	0.0279939	NA	5.29184	0.0386674	NA
YMR077C	VPS20	6.6559	0.00257577	NA	6.63013	0.0600908	0.033	6.54562	0.175797	0.131	6.49918	0.260954	0.212
YMR079W	SEC14	8.19317	0.0264084	NA	8.2518	0.0852401	0.033	8.32615	0.12911	0.083	8.31998	0.172708	0.135
YMR083W	ADH3	10.5338	0.00283216	NA	10.5269	0.00440743	NA	10.5134	0.0141201	0.008	10.33	0.0325648	0.024
YMR085W		3.06873	0.00312669	NA	3.02387	-0.051292	NA	3.6394	-0.0733553	NA	4.08707	-0.0902101	NA
YMR086W	SEG1	5.14295	0.0161726	NA	4.84588	0.055389	NA	4.37323	0.0449916	NA	4.13396	0.0298246	NA
YMR088C	VBA1	6.34223	-0.00852111	NA	6.33477	-0.00906931	NA	6.2018	0.011555	NA	5.8258	0.0719009	0.038
YMR091C	NPL6	5.5713	0.0269454	NA	5.43225	0.10463	0.036	5.0345	0.157069	0.078	4.86732	0.259545	0.164
YMR095C	SNO1	7.59528	-0.0047579	NA	7.46185	-0.0196796	NA	7.11105	-0.0684544	-0.026	6.69202	-0.043364	NA
YMR096W	SNZ1	11.2916	0.0070841	NA	11.2158	0.0427193	NA	11.0497	0.132064	0.069	10.6447	0.253624	0.197
YMR098C	ATP25	5.29623	0.0216601	NA	5.14595	0.0423544	NA	4.89838	0.078709	NA	4.59164	0.145351	0.051
YMR099C		6.8413	0.00972156	NA	6.81112	0.0281536	NA	6.78663	0.0495097	NA	6.56263	0.0991312	0.036
YMR103C		4.7951	-0.0336072	NA	4.86958	-0.0427853	NA	5.06234	-0.0314127	NA	5.39019	-0.00179938	NA
YMR105C	PGM2	7.69421	0.000906242	NA	7.55773	0.00662554	0	7.21783	0.0371292	0.023	7.25442	0.0503281	0.033
YMR108W	ILV2	9.33397	-0.000709541	NA	9.34958	0.00305191	0	9.50861	0.0223899	0.017	9.82997	0.0519072	0.043
YMR109W	MYO5	6.5754	-0.00168174	NA	6.56449	0.00761949	NA	6.46074	0.00950386	NA	6.46655	0.0195149	0.007
YMR110C	HFD1	5.64152	0.0519836	NA	5.51518	0.0857821	NA	5.30724	0.130668	0.039	5.16278	0.126757	0.041
YMR111C		4.75582	-0.0167357	NA	4.54373	0.0739929	NA	4.25393	0.0566861	NA	4.21851	0.236476	0.122
YMR115W	MGR3	5.02771	0.00283441	NA	4.79405	0.0536348	NA	4.46263	0.104497	0.031	4.55154	0.196573	0.109
YMR116C	ASC1	11.436	-0.000702357	NA	11.4093	0.0310806	0.007	11.2529	0.119998	0.083	11.0929	0.219039	0.178
YMR120C	ADE17	9.52965	-0.000329521	NA	9.5827	0.00265915	0	9.60866	0.0056962	0.003	9.45448	0.0104165	0.007
YMR121C	RPL15B	6.93264	0.00244374	NA	6.85845	0.00706121	NA	6.45152	0.0330461	0.016	6.20256	0.0768321	0.046
YMR123W	PKR1	7.30366	-0.00489538	NA	7.2003	-0.00233976	NA	6.93862	0.0145654	NA	6.64186	0.0664562	0.041
YMR126C	DLT1	6.00032	0.00127368	NA	6.07316	0.0311444	0.014	6.10237	0.218673	0.168	6.01525	0.36302	0.3
YMR128W	ECM16	5.59792	0.0148178	NA	5.48719	0.0669506	0.021	5.2351	0.413605	0.311	5.30879	0.623914	0.535
YMR129W	POM152	5.80069	0.00549032	NA	5.74482	0.0280475	NA	5.37714	0.0102766	NA	5.0827	0.0324662	NA
YMR130W		5.66568	-0.00407909	NA	5.65176	0.0362187	NA	5.36103	-0.00477511	NA	5.31111	0.0346901	NA
YMR131C	RRB1	8.3664	0.00286169	NA	8.35743	0.0643414	0.021	8.13389	0.136908	0.086	7.89797	0.220686	0.168
YMR135C	GID8	5.37322	0.0458619	NA	5.32321	0.0280036	NA	5.15052	0.0242824	NA	5.04791	0.0397424	NA
YMR137C	PSO2	4.36063	0.0123702	NA	4.37803	0.0294467	NA	4.35792	0.126021	0.069	4.3908	0.243464	0.165
YMR139W	RIM11	4.86018	-0.0346576	NA	4.79707	0.0855268	0.002	4.46589	0.132385	0.039	4.37878	0.293673	0.18
YMR143W	RPS16A	10.9852	6.79825e-05	NA	10.9873	0.00296513	0.001	11.0443	0.0160295	0.012	10.9953	0.0329852	0.028
YMR144W		4.11427	0.0688865	NA	3.847	0.249218	0.085	3.65196	0.238914	0.098	3.37454	0.26501	0.109
YMR145C	NDE1	7.00641	0.0198916	NA	7.05214	0.147819	0.069	6.91106	0.316693	0.235	6.76097	0.505843	0.437
YMR152W	YIM1	6.09117	0.00135151	NA	6.09239	0.00894548	NA	6.16228	0.0415377	0.021	6.30817	0.089042	0.062
YMR153W	NUP53	5.92177	0.0533216	NA	5.70834	0.0394661	NA	5.21	0.076949	NA	4.81304	0.0365393	NA
YMR155W		4.50805	0.0127215	NA	4.48145	0.0521788	NA	4.11774	0.0749919	0.003	3.90616	0.102516	0.013
YMR157C	AIM36	4.59698	0.0635276	NA	4.2762	0.0149227	NA	3.98894	0.020475	NA	3.69728	0.133369	NA
YMR161W	HLJ1	7.87429	0.00615471	NA	7.83844	0.0111885	NA	7.54978	0.000362703	NA	7.4762	0.00936018	NA
YMR162C	DNF3	5.75875	0.0876821	NA	5.62608	0.189902	0.078	5.0981	0.414874	0.29	5.05451	0.504852	0.393
YMR163C	INP2	3.204	-0.0378507	NA	3.25494	-0.0222635	NA	3.20668	0.228855	0.082	3.26667	0.375803	0.217
YMR170C	ALD2	5.49801	0.0647268	NA	5.50575	0.0512318	NA	5.32202	0.164534	0.07	5.15049	0.236855	0.148
YMR173W/YMR173W-A	DDR48	10.0059	0.0112451	NA	9.94592	0.013909	NA	9.85101	0.0612977	0.024	9.6962	0.10343	0.067
YMR178W		7.81612	0.0278775	NA	7.75309	0.101706	0.045	7.45082	0.186446	0.132	7.05778	0.258876	0.203
YMR180C	CTL1	2.95322	0.0262518	NA	3.03003	0.1164	NA	2.93102	0.247436	0.073	3.28216	0.247502	0.095
YMR181C		5.85667	0.00970946	NA	5.69528	0.0271832	NA	5.20058	-0.0291997	NA	5.17307	-0.0201915	NA
YMR183C	SSO2	7.84492	0.00586296	NA	7.83489	0.0405908	NA	7.9295	0.0665006	0.028	8.09469	0.144066	0.112
YMR185W	RTP1	5.32932	0.0015207	NA	5.38536	0.0149091	NA	5.45356	0.0449464	0.02	5.58699	0.0622989	0.035
YMR186W	HSC82	9.53009	-0.00376007	0	9.5279	0.0043969	0	9.72034	0.0872484	0.067	10.0612	0.339476	0.29
YMR189W	GCV2	10.6575	0.0237901	NA	10.6412	0.0307029	0.008	10.485	0.0479665	0.023	10.2838	0.0909104	0.071
YMR190C	SGS1	5.30594	0.027279	NA	5.09478	0.122917	0.034	4.79692	0.198075	0.105	4.62291	0.182128	0.087
YMR191W	SPG5	4.76552	-0.0100435	NA	4.88077	-0.00717843	NA	4.78137	-0.00927036	NA	4.64954	0.0292102	NA
YMR192W	GYL1	4.51514	0.0336008	NA	4.46861	0.0964905	0.018	4.19399	0.144624	0.053	4.30648	0.121111	0.042
YMR194C-B	CMC4	6.26336	-0.034286	NA	6.09135	-0.0476334	NA	5.79421	-0.0954458	-0.023	5.39666	-0.158383	-0.073
YMR194W	RPL36A	10.9539	-0.000103997	NA	11.0321	0.00101112	0	11.046	0.00602405	0.004	10.5597	0.0259653	0.021
YMR195W	ICY1	8.25261	0.00136677	NA	7.80057	0.0093362	0.002	7.20237	0.0269671	0.013	7.03211	0.0511297	0.029
YMR197C	VTI1	6.40861	0.00580221	NA	5.96993	0.0218093	NA	5.35207	0.0157343	NA	5.10201	0.0153568	NA
YMR198W	CIK1	4.37346	0.0476214	NA	3.84801	0.0501313	NA	3.13312	0.121648	NA	2.9081	0.164938	NA
YMR199W	CLN1	6.04692	0.00210154	NA	5.96476	0.0396856	0.017	5.93363	0.121721	0.085	5.8865	0.128753	0.092
YMR200W	ROT1	7.26082	0.00969357	NA	7.07779	-0.0146813	NA	6.61365	-0.0376913	NA	6.40142	-0.0536223	NA
YMR201C	RAD14	4.0942	0.0534953	NA	3.86858	0.0789263	NA	3.64147	0.364669	0.195	3.45306	0.178204	NA
YMR203W	TOM40	7.8024	0.0203307	NA	7.86128	0.101463	0.036	7.90408	0.294271	0.219	7.86867	0.484563	0.424
YMR204C	INP1	3.41211	0.0897195	NA	3.06375	0.143107	NA	2.85869	0.0966807	NA	3.08055	0.262572	0.116
YMR205C	PFK2	10.0657	0.0251535	NA	9.99567	0.0562215	0.011	9.80286	0.0985257	0.052	9.62124	0.27631	0.229
YMR209C		6.51732	0.0120004	NA	6.59622	0.0674601	0.009	6.3995	0.092918	0.036	6.15952	0.110671	0.057
YMR212C	EFR3	9.29115	0.00172078	NA	9.18414	0.00874493	0	8.73017	0.0246642	0.013	8.38428	0.0299907	0.017
YMR214W	SCJ1	6.36624	0.0214997	NA	6.16517	0.0729901	0.022	5.74212	0.13124	0.068	5.32045	0.23917	0.148
YMR215W	GAS3	7.08606	0.017306	NA	7.14788	0.0320427	NA	7.1678	0.0958977	0.056	7.03492	0.151187	0.109
YMR216C	SKY1	5.6235	0.0215229	NA	5.35673	0.0454767	NA	4.93487	0.0713176	NA	4.75657	0.0842571	NA
YMR217W	GUA1	8.42025	-0.00102921	NA	8.54679	0.0154746	0.007	8.73129	0.0896542	0.07	8.84317	0.22109	0.188
YMR218C	TRS130	5.88409	-0.0238533	NA	5.94498	0.0127942	NA	5.75913	0.0274545	NA	5.75548	0.0342412	0.01
YMR220W	ERG8	7.50062	0.0107136	NA	7.46315	0.151216	0.071	7.37631	0.389856	0.302	7.15962	0.57694	0.509
YMR221C		7.01734	0.0231444	NA	7.03813	0.0463144	NA	7.03584	0.110653	0.048	6.87631	0.191607	0.13
YMR224C	MRE11	3.8857	-0.00918334	NA	3.54066	-0.000495455	NA	3.1913	0.0999037	NA	3.27348	0.106805	NA
YMR228W	MTF1	5.43357	0.0120941	NA	5.30786	0.0435926	0.014	4.8745	0.194334	0.123	4.7866	0.245438	0.165
YMR229C	RRP5	8.49676	-0.00066644	NA	8.47264	0.0347441	0.022	8.34676	0.182076	0.149	8.20242	0.448816	0.399
YMR233W	TRI1	4.39509	0.0298143	NA	4.13374	0.00864072	NA	3.88128	0.0487958	NA	4.03637	0.0164681	NA
YMR235C	RNA1	8.09144	0.00794879	NA	8.07052	0.0147972	0.005	8.04267	0.0298375	0.018	7.8238	0.0978619	0.076
YMR236W	TAF9	8.79904	0.00149639	NA	8.65918	0.0198997	NA	8.15652	0.0511641	0.027	7.83175	0.0834113	0.055
YMR237W	BCH1	6.90811	0.00528185	NA	6.8246	0.0433701	0.018	6.63574	0.159581	0.115	6.17406	0.372309	0.303
YMR241W	YHM2	8.85491	0.0132223	NA	8.88504	0.0304924	0.008	8.88067	0.0971617	0.067	8.62865	0.245843	0.203
YMR242C	RPL20A	10.804	0.000706774	NA	10.8626	0.0056675	0.003	10.9107	0.0408484	0.032	10.7846	0.0827911	0.07
YMR244C-A	COA6	5.92518	-0.00188628	NA	5.79099	0.00414056	NA	5.31149	0.0687836	NA	5.17104	0.0395675	NA
YMR246W	FAA4	8.57016	0.0147408	NA	8.54992	0.0378216	0.012	8.42661	0.0556749	0.031	8.39724	0.0899742	0.068
YMR250W	GAD1	5.90336	0.00814018	NA	5.73762	0.033386	NA	5.31498	0.179027	0.106	5.12714	0.412811	0.311
YMR251W-A	HOR7	10.2919	-0.00367743	NA	10.3445	-0.0013755	NA	10.3092	-0.053113	NA	10.241	-0.0410112	NA
YMR255W	GFD1	6.43028	0.05327	NA	6.25977	0.216568	0.118	6.00338	0.484393	0.379	6.02091	0.572829	0.49
YMR256C	COX7	7.34657	0.0159803	NA	7.30365	-0.00149678	NA	7.06454	-0.00088742	NA	6.80509	0.00291024	NA
YMR257C	PET111	4.74532	0.00111042	NA	4.60053	0.124457	0.012	4.30698	0.231497	0.107	4.32708	0.291988	0.164
YMR259C	TRM732	5.58256	-0.00922781	NA	5.72198	0.0196166	NA	5.9755	0.112038	0.065	6.21066	0.144494	0.1
YMR260C	TIF11	10.5329	-0.000290181	NA	10.5742	0.000642021	NA	10.6116	0.00359054	0.002	10.5599	0.0108379	0.008
YMR262W		5.29367	0.0604825	NA	5.14857	0.111663	0.018	4.8053	0.230241	0.129	4.70767	0.170308	0.079
YMR263W	SAP30	5.08831	0.0117649	NA	4.91374	0.119666	0.029	4.77812	0.273063	0.164	4.6093	0.360704	0.246
YMR265C		3.91284	-0.0180335	NA	3.61876	0.0111373	NA	3.17946	0.0549152	NA	3.00164	0.070324	NA
YMR267W	PPA2	5.03718	0.0112873	NA	4.90226	0.0395877	NA	4.70194	0.120676	0.047	4.29485	0.210914	0.106
YMR269W	TMA23	4.68721	0.0176537	NA	4.43105	0.116219	0.045	4.38283	0.277336	0.183	4.66832	0.365043	0.278
YMR270C	RRN9	3.79092	0.0215402	NA	3.80636	0.0850645	0.005	3.67259	0.240708	0.127	3.87816	0.395492	0.276
YMR274C	NA	NA	NA	NA	NA	NA	NA	5.02106	0.0616458	0.035	5.10273	0.143762	0.102
YMR277W	FCP1	5.86096	-0.0185702	NA	5.82018	-0.00407144	NA	5.99731	0.00472042	NA	6.34568	-0.0130952	NA
YMR282C	AEP2	5.54523	0.0255601	NA	5.60174	0.133232	0.036	5.68923	0.258147	0.161	5.78574	0.308136	0.229
YMR284W	NA	NA	NA	NA	5.02179	0.0464083	0.017	4.70648	0.105641	0.059	4.6195	0.189863	0.121
YMR285C	NGL2	6.6569	-0.000588211	NA	6.6507	0.0209662	0.009	6.45074	0.122073	0.089	6.54205	0.191992	0.154
YMR286W	MRPL33	5.14564	-0.00515138	NA	5.07752	0.0486441	NA	5.02612	0.29412	0.193	5.14862	0.449603	0.355
YMR287C	DSS1	4.70746	-0.0188716	NA	4.50011	0.151293	0.06	4.61257	0.336768	0.233	4.67655	0.528275	0.429
YMR290C	HAS1	7.17317	-0.00380664	NA	7.14096	0.00879486	NA	7.20554	0.0129386	NA	7.25727	0.0427819	0.023
YMR291W	TDA1	6.06813	0.00545735	NA	5.91953	-0.00324236	NA	5.69553	-0.00285711	NA	5.41059	-0.0334064	NA
YMR300C	ADE4	8.3417	0.00489208	NA	8.33527	0.148012	0.064	8.23529	0.358299	0.271	8.0355	0.409808	0.344
YMR301C	NA	NA	NA	NA	NA	NA	NA	5.66803	0.0552918	0.033	5.82328	0.128349	0.095
YMR302C	YME2	6.81276	0.00957652	NA	6.65993	0.0513119	0.014	6.33218	0.106327	0.06	6.28361	0.112011	0.067
YMR304C-A/YMR305C	NA	NA	NA	NA	NA	NA	NA	3.70905	-0.0432949	NA	4.18818	-0.00250635	NA
YMR304W	UBP15	7.74032	0.0176223	NA	7.68446	0.0921022	0.023	7.4143	0.240959	0.161	7.16592	0.297851	0.226
YMR307W	GAS1	10.3268	0.0114622	NA	10.3736	0.0198035	0.004	10.48	0.0106228	NA	10.3857	0.01781	0.004
YMR308C	PSE1	8.09662	0.0030178	NA	8.0895	0.0518393	0.03	7.90721	0.170493	0.13	7.88009	0.26249	0.219
YMR309C	NIP1	8.24537	0.0132203	NA	8.33717	0.0325956	0.013	8.41691	0.0490107	0.03	8.68666	0.0548467	0.04
YMR314W	PRE5	7.32943	0.0219109	NA	7.28843	0.0425254	0.013	7.09646	0.0879021	0.052	6.66458	0.209471	0.156
YMR316W	DIA1	4.68772	-0.0150314	NA	4.44677	0.0175204	NA	4.07798	-0.0041947	NA	3.93931	0.0932867	NA
YMR319C	FET4	6.28435	0.0110556	NA	6.36767	0.0569765	0.025	6.30249	0.0950451	0.063	6.39289	0.120904	0.089
YNL002C	RLP7	8.554	0.00177121	NA	8.44622	0.0252848	0.015	8.31396	0.0795599	0.061	8.30009	0.118465	0.097
YNL003C	PET8	4.32176	0.00206288	NA	3.98672	0.0113623	NA	3.73876	0.0949755	NA	3.52386	0.0897788	NA
YNL004W	HRB1	6.9812	0.00100888	NA	6.81975	0.0562651	0.034	6.63703	0.22233	0.172	6.67264	0.368274	0.311
YNL005C	MRP7	6.06513	0.032919	NA	5.91676	0.0937004	0.019	5.647	0.134818	0.057	5.30121	0.170322	0.084
YNL006W	LST8	6.12268	0.0261374	NA	5.8445	0.113095	0.026	5.3365	0.108388	0.016	5.06986	0.0390323	NA
YNL008C	ASI3	6.87967	-0.00137834	NA	6.9523	0.0145557	0.005	6.89587	0.0432872	0.028	7.23117	0.106457	0.085
YNL016W	PUB1	6.92857	0.0149286	NA	6.92312	-0.00946155	NA	7.01107	-0.0380406	NA	6.76838	-0.030301	NA
YNL021W	HDA1	3.758	0.0940484	NA	3.46587	0.0452075	NA	2.94043	0.10985	NA	2.8196	0.0271635	NA
YNL022C	RCM1	5.18304	0.0736409	NA	4.98838	0.161925	0.053	4.66393	0.231733	0.116	4.55107	0.319934	0.204
YNL023C	FAP1	4.38493	0.0858298	NA	4.28285	0.132781	0.013	3.93028	0.18912	0.058	3.43139	0.306156	0.13
YNL026W	SAM50	4.98787	0.0219434	NA	4.98211	0.105289	0.028	4.59551	0.271077	0.161	4.25524	0.471859	0.339
YNL027W	CRZ1	4.90572	0.00586906	NA	4.9708	0.0301062	NA	4.986	0.153146	0.098	5.24638	0.206147	0.154
YNL031C	HHT2	11.1403	0.00706447	0.001	11.145	0.00841359	0.003	11.1467	0.00625156	0.001	11.099	0.00798087	0.004
YNL032W	SIW14	3.59957	-0.00878966	NA	3.27492	0.130521	NA	2.68943	-0.00172612	NA	2.56716	0.237788	0.037
YNL036W	NCE103	10.1068	0.0281138	NA	10.0609	0.0939374	0.024	9.89263	0.203031	0.122	9.79221	0.265746	0.18
YNL037C	IDH1	7.79102	0.0157623	NA	7.8453	0.0392269	0.015	7.91066	0.126621	0.094	8.1143	0.243294	0.206
YNL040W		6.1036	-0.016437	NA	6.05345	0.00750732	NA	5.81435	-0.051174	NA	5.38674	-0.0178336	NA
YNL042W	BOP3	6.35112	0.0173504	NA	6.05766	0.0603193	0.023	5.79424	0.161239	0.105	5.71479	0.174586	0.116
YNL044W	YIP3	7.40016	0.0247725	NA	7.41329	0.0273857	NA	7.26021	0.0463903	0.002	7.03748	0.0617951	0.025
YNL045W	LAP2	7.08323	0.0175063	NA	7.10074	0.095079	0.02	6.96748	0.178859	0.099	6.61681	0.28914	0.215
YNL049C	SFB2	7.08989	-0.000934759	NA	7.0028	0.0180352	NA	6.68499	0.0865457	0.04	6.48809	0.092569	0.048
YNL050C	NA	NA	NA	NA	4.18709	0.040898	NA	4.44653	0.121275	0.07	4.8088	0.267632	0.206
YNL051W	COG5	5.36016	-0.0450084	NA	5.22951	0.170055	0.07	4.89663	0.408052	0.286	4.83902	0.606273	0.499
YNL052W	COX5A	6.55326	0.0151421	NA	6.57301	0.00903048	NA	6.38501	0.00104865	NA	6.36472	0.0107976	NA
YNL053W	MSG5	5.08378	0.00716479	NA	4.96819	0.039288	NA	4.76092	0.160301	0.094	4.74435	0.231546	0.152
YNL055C	POR1	10.0411	0.0110726	NA	10.0267	0.0201562	NA	9.92194	-0.0222026	NA	9.74466	-0.0791168	-0.032
YNL056W	OCA2	6.55964	0.029965	NA	6.50635	0.0356964	NA	6.1357	0.0713356	0.009	5.8532	0.0606639	NA
YNL059C	ARP5	4.93376	-0.0320243	NA	4.99105	0.18298	0.066	5.21837	0.548641	0.418	5.48062	0.599914	0.503
YNL061W	NOP2	5.32362	-0.000436498	NA	5.33056	0.0208099	NA	5.46197	0.149088	0.102	5.58468	0.284994	0.227
YNL062C	GCD10	5.55476	0.0695882	NA	5.49661	0.0684891	NA	4.99513	0.0850836	NA	4.57497	0.110872	0.01
YNL063W	MTQ1	4.66637	-0.00497589	NA	4.49916	0.0324704	NA	4.08892	0.150217	0.067	4.12872	0.268	0.163
YNL064C	YDJ1	8.85465	0.0146496	NA	8.84456	0.101177	0.064	8.83413	0.332402	0.27	8.90352	0.647322	0.591
YNL065W	AQR1	4.06341	-0.0141981	NA	4.04048	0.0620617	0.006	4.14149	0.135671	0.071	4.12509	0.159898	0.091
YNL066W	SUN4	8.32719	0.00745078	NA	8.22996	0.0017384	NA	7.85371	-0.0170744	NA	7.58616	0.0150685	NA
YNL067W	RPL9B	9.67548	0.0219797	NA	9.69755	0.0436506	NA	9.68303	0.00743662	NA	9.13575	0.126436	0.077
YNL069C	RPL16B	10.6437	-8.51284e-05	NA	10.6998	0.0172173	0.012	10.7469	0.0852745	0.068	10.7684	0.149752	0.128
YNL071W	LAT1	8.65183	0.0425034	NA	8.62537	0.0263322	NA	8.5442	-0.0190381	NA	8.4109	-0.025918	NA
YNL074C	MLF3	5.99824	0.0589632	NA	5.90337	0.0714989	NA	5.43661	0.116178	0.032	5.14534	0.125802	0.038
YNL075W	IMP4	5.70207	0.00314001	NA	5.65271	0.0498984	0.021	5.46179	0.134824	0.091	5.38111	0.224	0.166
YNL076W	MKS1	5.07002	0.0198668	NA	5.00205	0.0420356	0.002	4.71405	0.0539838	0.011	4.61507	0.0892645	0.035
YNL077W	APJ1	3.58193	0.0313089	NA	3.56435	0.12038	0.027	3.7426	0.169485	0.085	3.89191	0.260211	0.165
YNL078W	NIS1	7.34854	0.116745	0.029	7.10243	0.321305	0.212	6.68746	0.483306	0.384	6.65922	0.507721	0.428
YNL079C	TPM1	8.74383	0.00321392	NA	8.60786	0.00461463	NA	8.66965	0.00821606	0.003	8.63333	0.0132156	0.007
YNL083W	SAL1	5.01444	0.114012	0.002	4.94078	0.175929	0.067	4.73962	0.275839	0.174	4.85963	0.313556	0.233
YNL084C	END3	5.74977	0.0247016	NA	5.70982	0.142348	0.074	5.60652	0.437719	0.341	5.52512	0.681486	0.595
YNL086W	SNN1	4.98177	0.0144921	NA	4.7706	-0.00650469	NA	4.78415	-0.0218229	NA	4.92901	-0.0109422	NA
YNL088W	TOP2	6.04912	0.0384036	NA	5.91615	0.0959281	0.023	5.64174	0.191604	0.104	5.40364	0.198324	0.114
YNL090W	RHO2	6.23187	0.0236299	NA	6.21247	0.0962481	0.017	5.95924	0.240677	0.153	5.74203	0.273313	0.197
YNL091W	NST1	7.03101	0.0115914	NA	6.86595	0.05351	0.026	6.63494	0.145434	0.104	6.38828	0.287687	0.228
YNL092W		3.67753	-0.0399466	NA	3.43542	0.102963	NA	3.166	0.0654176	NA	2.94846	-0.0557694	NA
YNL094W	APP1	7.28542	0.0206791	NA	7.16534	0.0620723	NA	6.83266	0.161992	0.091	6.63492	0.174133	0.109
YNL095C		3.7638	0.11025	NA	3.56829	0.133012	NA	3.11462	0.0919147	NA	2.72252	0.077847	NA
YNL096C	RPS7B	9.50535	0.0155577	NA	9.55605	0.0140629	NA	9.53617	-0.00375603	NA	9.32977	-0.000480442	NA
YNL098C	RAS2	7.98272	0.00620812	NA	7.95827	-0.00187677	NA	7.92208	-0.0183462	NA	7.93214	0.0912895	0.038
YNL099C	OCA1	5.85799	0.00136066	NA	5.73733	0.0128594	NA	5.392	-0.00668393	NA	5.15704	0.0907641	0.03
YNL101W	AVT4	6.15704	0.0165518	NA	6.08918	0.0661079	0.018	5.92511	0.0950409	0.045	5.89863	0.137142	0.084
YNL104C	LEU4	10.6713	0.000689761	NA	10.6408	0.00469566	0.002	10.5082	0.0322721	0.026	10.3507	0.0958116	0.082
YNL106C	INP52	4.26481	0.0980458	NA	4.14098	0.0859393	NA	3.76691	0.221901	0.073	3.746	0.204815	0.059
YNL111C	CYB5	5.47681	0.0425641	NA	5.47784	0.036629	NA	5.47029	0.042102	0.007	5.36086	0.0501141	0.019
YNL115C		5.33892	0.0342934	NA	5.38735	0.00356917	NA	5.23403	-0.0127241	NA	5.12867	0.0666593	0.018
YNL119W	NCS2	5.0953	-0.0113601	NA	4.98124	0.0470691	NA	4.59071	0.108462	NA	4.46806	0.124836	0.01
YNL121C	TOM70	7.24873	0.0256001	NA	7.30475	0.0759311	0.011	7.33337	0.115252	0.051	7.53411	0.231405	0.175
YNL122C		5.97611	0.0130783	NA	5.75272	0.13667	0.04	5.38137	0.345064	0.23	5.48612	0.406961	0.305
YNL123W	NMA111	7.30228	-0.00130635	NA	7.33027	0.0166995	0.007	7.38912	0.0973555	0.075	7.56714	0.185076	0.156
YNL126W	SPC98	5.30249	0.0114856	NA	5.2714	0.0771903	0.025	4.90231	0.11979	0.057	4.58717	0.193721	0.105
YNL127W	FAR11	7.4261	0.039326	NA	7.28115	0.0497844	0.014	6.89997	0.0419097	0.004	6.70908	0.0604337	0.028
YNL128W	TEP1	1.83676	0.0595492	NA	1.87358	0.0948072	NA	2.16921	0.0940669	NA	2.23538	-0.1066	NA
YNL129W	NRK1	6.22226	0.0108214	NA	6.10625	0.00389497	NA	5.61006	-0.0218846	NA	5.42055	0.0413411	NA
YNL130C	CPT1	8.52271	-0.000353634	NA	8.47918	0.0464951	0.012	8.27293	0.0810512	0.042	7.96763	0.235197	0.188
YNL131W	TOM22	7.91384	0.012813	NA	7.94869	0.0383524	NA	7.93988	0.0439131	0.01	7.98611	0.0939702	0.066
YNL132W	KRE33	6.69248	0.00967975	NA	6.65671	0.0194808	NA	6.71716	0.0828921	0.053	6.90417	0.141356	0.109
YNL135C	FPR1	11.444	0.0301081	NA	11.4644	0.0248069	NA	11.4872	-0.00112478	NA	11.4973	-0.00800015	NA
YNL136W	EAF7	5.84355	-0.00114677	NA	5.62207	0.0318763	NA	5.33478	0.207064	0.134	5.55003	0.244806	0.178
YNL137C	NAM9	6.07911	0.0944492	NA	5.96297	0.125799	0.034	5.58964	0.282832	0.181	5.60231	0.346376	0.261
YNL138W	SRV2	6.98628	0.0418497	NA	6.95539	0.07606	0.018	6.94711	0.135441	0.078	6.85635	0.19164	0.139
YNL138W-A	YSF3	6.00703	0.0209749	NA	5.85604	0.0153316	NA	5.51947	0.0656817	NA	5.04701	0.0804591	NA
YNL139C/YNL140C	THO2	5.56246	-0.0350381	NA	5.271	-0.00332393	NA	4.63072	0.0383197	NA	4.20019	0.100374	NA
YNL145W	MFA2	12.3934	0.000319804	NA	12.3215	0.00420055	0.002	12.0463	0.0158494	0.012	12.2649	0.0225558	0.019
YNL151C	RPC31	7.14533	-0.0192603	NA	7.06392	0.00167924	NA	6.60215	0.0299227	NA	6.23762	0.043859	0.008
YNL152W	INN1	5.00071	0.0172157	NA	4.81332	0.0191547	NA	4.52665	0.0282623	NA	4.46554	0.0207646	NA
YNL153C	GIM3	7.63597	0.00847922	NA	7.60793	0.11594	0.068	7.47043	0.248658	0.187	7.22944	0.331342	0.272
YNL156C	NSG2	6.04735	-0.012406	NA	5.88203	0.0789059	NA	5.72357	0.251714	0.156	5.62751	0.351832	0.263
YNL157W	IGO1	6.71464	0.0211317	NA	6.59306	0.104939	0.065	6.41051	0.326509	0.26	6.50604	0.437056	0.376
YNL161W	CBK1	6.55524	0.0498543	NA	6.32613	0.168472	0.077	5.98976	0.263559	0.182	5.83611	0.304956	0.236
YNL162W	RPL42A	7.99566	0.000143895	NA	8.05416	0.00787293	0.003	8.1385	0.0483403	0.036	8.15083	0.123802	0.102
YNL163C	RIA1	4.85799	0.0360012	NA	4.9727	0.147608	0.056	4.97854	0.432674	0.324	5.16172	0.584097	0.499
YNL164C	IBD2	6.64229	0.00118803	NA	6.41613	0.00676062	NA	5.76466	0.0512551	NA	5.95028	0.0529895	NA
YNL165W		4.0748	0.0635438	NA	3.914	-0.00144907	NA	3.54298	0.100907	NA	3.33987	0.0604728	NA
[truncated: 525 more rows]
