# Supplementary material for: Genetic and pharmacological evidence for kinetic competition between alternative poly(A) sites in yeast
Source: eLife. 2021 Jul 7;10:e65331. doi: 10.7554/eLife.65331 (PMC8263057; doi:10.7554/eLife.65331)
Supplement: Figure 4—source data 2. — The full list of proteins found using DIA mass spectrometry on untreated cells and cells treated with cordycepin for 40 min. Proteins with fold changes that have significant q-values are indicated. [file elife-65331-fig4-data2.xlsx]

## Sheet: All proteomics data
Comparison (group1/group2)	Group	ProteinGroups	AVG Log2 Ratio	Absolute AVG Log2 Ratio	Qvalue	# of Ratios	AVG Log2 Ratio	Absolute AVG Log2 Ratio	UniProtIds	Genes	ProteinDescriptions	ProteinNames	# Unique Total Peptides	% Change	Ratio	Condition Numerator	Condition Denominator
40 min / 0 min	A5Z2X5	A5Z2X5	-0.0620298	0.0620298	0.796736	10	0.0169313	0.0169313	A5Z2X5	YPR010C-A	UPF0495 protein YPR010C-A	YP010_YEAST	2	-4.20846	0.957915	40 min	0 min
40 min / 0 min	D6VTK4	D6VTK4	-0.59288	0.59288	6.32415e-05	25	-0.663134	0.663134	D6VTK4	STE2	Pheromone alpha factor receptor	STE2_YEAST	5	-33.6982	0.663018	40 min	0 min
40 min / 0 min	O13297	O13297	-0.0827871	0.0827871	0.590289	55	0.300341	0.300341	O13297	CET1	mRNA-capping enzyme subunit beta	CET1_YEAST	9	-5.57683	0.944232	40 min	0 min
40 min / 0 min	O13329	O13329	0.100865	0.100865	0.772591	5	0.0362348	0.0362348	O13329	FOB1	DNA replication fork-blocking protein FOB1	FOB1_YEAST	1	7.24161	1.07242	40 min	0 min
40 min / 0 min	O13516	O13516	-0.345316	0.345316	0.538512	5	-0.340935	0.340935	O13516	RPS9A	40S ribosomal protein S9-A	RS9A_YEAST	1	-21.2865	0.787135	40 min	0 min
40 min / 0 min	O13525	O13525	-0.0227783	0.0227783	0.754841	5	-0.0294541	0.0294541	O13525	COQ4	Ubiquinone biosynthesis protein COQ4, mitochondrial	COQ4_YEAST	1	-1.56647	0.984335	40 min	0 min
40 min / 0 min	O13535	O13535	0.465245	0.465245	0.740334	10	-0.326191	0.326191	O13535	TY1B-H	Transposon Ty1-H Gag-Pol polyprotein	YH11B_YEAST	2	38.0552	1.38055	40 min	0 min
40 min / 0 min	O13539	O13539	-0.019817	0.019817	0.783165	10	0.0137111	0.0137111	O13539	THP2	THO complex subunit THP2	THP2_YEAST	2	-1.36422	0.986358	40 min	0 min
40 min / 0 min	O13547	O13547	-0.0325093	0.0325093	0.691828	20	0.103049	0.103049	O13547	CCW14	Covalently-linked cell wall protein 14	CCW14_YEAST	3	-2.22818	0.977718	40 min	0 min
40 min / 0 min	O13563	O13563	-0.364725	0.364725	0.0875386	20	-0.354903	0.354903	O13563	RPN13	26S proteasome regulatory subunit RPN13	RPN13_YEAST	4	-22.3383	0.776617	40 min	0 min
40 min / 0 min	O13585	O13585	0.0673416	0.0673416	0.627826	20	-0.164133	0.164133	O13585	YPR089W	Dilute domain-containing protein YPR089W	YP089_YEAST	4	4.77842	1.04778	40 min	0 min
40 min / 0 min	O14455	O14455	0.0484424	0.0484424	0.754513	20	0.0506085	0.0506085	O14455	RPL36B	60S ribosomal protein L36-B	RL36B_YEAST	2	3.41478	1.03415	40 min	0 min
40 min / 0 min	O14467	O14467	-0.154247	0.154247	0.625724	65	-0.0947703	0.0947703	O14467	MBF1	Multiprotein-bridging factor 1	MBF1_YEAST	10	-10.1399	0.898601	40 min	0 min
40 min / 0 min	O14468	O14468	-1.4244	1.4244	0.59284	5	-0.803919	0.803919	O14468	YOR304C-A	Uncharacterized protein YOR304C-A	YO304_YEAST	1	-62.7425	0.372575	40 min	0 min
40 min / 0 min	O43137	O43137	-0.224002	0.224002	0.582479	35	-0.44098	0.44098	O43137	YBR085C-A	Uncharacterized protein YBR085C-A	YB085_YEAST	6	-14.3813	0.856187	40 min	0 min
40 min / 0 min	O60200	O60200	-0.174333	0.174333	0.650931	25	-0.152569	0.152569	O60200	MDM35	Mitochondrial distribution and morphology protein 35	MDM35_YEAST	4	-11.3823	0.886177	40 min	0 min
40 min / 0 min	O74302;P0CX57;P0CX58;P47099	O74302;P0CX57;P0CX58;P47099	0.575985	0.575985	0.0629056	15	0.831968	0.831968	O74302;P0CX57;P0CX58;P47099	TY1A-DR4;TY1A-A;TY1A-PR1;TY1A-JR2	Transposon Ty1-DR4 Gag polyprotein;Transposon Ty1-A Gag polyprotein;Transposon Ty1-PR1 Gag polyprotein;Transposon Ty1-JR2 Gag polyprotein	YD13A_YEAST;YA11A_YEAST;YP12A_YEAST;YJ12A_YEAST	2	49.0695	1.4907	40 min	0 min
40 min / 0 min	O74700	O74700	-0.206143	0.206143	0.381485	15	-0.418196	0.418196	O74700	TIM9	Mitochondrial import inner membrane translocase subunit TIM9	TIM9_YEAST	3	-13.3149	0.866851	40 min	0 min
40 min / 0 min	O75012	O75012	-0.14738	0.14738	0.731312	5	-0.136643	0.136643	O75012	MRP10	37S ribosomal protein MRP10, mitochondrial	MRP10_YEAST	1	-9.71113	0.902889	40 min	0 min
40 min / 0 min	P00044	P00044	0.0809032	0.0809032	0.633747	20	0.140375	0.140375	P00044	CYC1	Cytochrome c iso-1	CYC1_YEAST	3	5.768	1.05768	40 min	0 min
40 min / 0 min	P00127	P00127	0.597119	0.597119	0.506437	10	2.66341	2.66341	P00127	QCR6	Cytochrome b-c1 complex subunit 6	QCR6_YEAST	1	51.2692	1.51269	40 min	0 min
40 min / 0 min	P00128	P00128	0.0601726	0.0601726	0.581749	30	0.0655666	0.0655666	P00128	QCR7	Cytochrome b-c1 complex subunit 7	QCR7_YEAST	6	4.25905	1.04259	40 min	0 min
40 min / 0 min	P00163;P03873;P03879;Q9ZZW7	P00163;P03873;P03879;Q9ZZW7	0.292862	0.292862	0.623945	10	0.665827	0.665827	P00163;P03873;P03879;Q9ZZW7	COB;BI2;BI4;BI3	Cytochrome b;Cytochrome b mRNA maturase bI2;Intron-encoded RNA maturase bI4;Cytochrome b mRNA maturase bI3	CYB_YEAST;MBI2_YEAST;MBI4_YEAST;MBI3_YEAST	2	22.5068	1.22507	40 min	0 min
40 min / 0 min	P00330	P00330	0.0714404	0.0714404	0.647127	180	0.0742244	0.0742244	P00330	ADH1	Alcohol dehydrogenase 1	ADH1_YEAST	24	5.07652	1.05077	40 min	0 min
40 min / 0 min	P00358	P00358	0.0955259	0.0955259	0.787171	40	0.0107323	0.0107323	P00358	TDH2	Glyceraldehyde-3-phosphate dehydrogenase 2	G3P2_YEAST	5	6.84548	1.06845	40 min	0 min
40 min / 0 min	P00359	P00359	0.0667609	0.0667609	0.521177	225	0.0922253	0.0922253	P00359	TDH3	Glyceraldehyde-3-phosphate dehydrogenase 3	G3P3_YEAST	24	4.73625	1.04736	40 min	0 min
40 min / 0 min	P00360	P00360	0.151332	0.151332	0.371954	140	0.142548	0.142548	P00360	TDH1	Glyceraldehyde-3-phosphate dehydrogenase 1	G3P1_YEAST	18	11.0594	1.11059	40 min	0 min
40 min / 0 min	P00401	P00401	0.0398459	0.0398459	0.717174	5	0.041776	0.041776	P00401	COX1	Cytochrome c oxidase subunit 1	COX1_YEAST	1	2.8004	1.028	40 min	0 min
40 min / 0 min	P00410	P00410	0.132889	0.132889	0.37055	30	0.40235	0.40235	P00410	COX2	Cytochrome c oxidase subunit 2	COX2_YEAST	5	9.64869	1.09649	40 min	0 min
40 min / 0 min	P00424	P00424	-0.284338	0.284338	0.508378	5	-0.289077	0.289077	P00424	COX5A	Cytochrome c oxidase polypeptide 5A, mitochondrial	COX5A_YEAST	2	-17.8882	0.821118	40 min	0 min
40 min / 0 min	P00425	P00425	-0.151737	0.151737	0.224768	25	-0.155835	0.155835	P00425	COX5B	Cytochrome c oxidase polypeptide 5B, mitochondrial	COX5B_YEAST	5	-9.98338	0.900166	40 min	0 min
40 min / 0 min	P00427	P00427	-0.0239512	0.0239512	0.734644	40	-0.0216925	0.0216925	P00427	COX6	Cytochrome c oxidase subunit 6, mitochondrial	COX6_YEAST	7	-1.64647	0.983535	40 min	0 min
40 min / 0 min	P00431	P00431	-0.0712248	0.0712248	0.674441	100	-0.0561583	0.0561583	P00431	CCP1	Cytochrome c peroxidase, mitochondrial	CCPR_YEAST	15	-4.81704	0.95183	40 min	0 min
40 min / 0 min	P00445	P00445	-0.0365669	0.0365669	0.730682	90	0.0399434	0.0399434	P00445	SOD1	Superoxide dismutase [Cu-Zn]	SODC_YEAST	13	-2.50277	0.974972	40 min	0 min
40 min / 0 min	P00447	P00447	-0.000378651	0.000378651	0.72361	45	-0.0314746	0.0314746	P00447	SOD2	Superoxide dismutase [Mn], mitochondrial	SODM_YEAST	7	-0.0262427	0.999738	40 min	0 min
40 min / 0 min	P00498	P00498	-0.0928372	0.0928372	0.683462	140	-0.0483595	0.0483595	P00498	HIS1	ATP phosphoribosyltransferase	HIS1_YEAST	18	-6.23231	0.937677	40 min	0 min
40 min / 0 min	P00546	P00546	-0.0497664	0.0497664	0.597491	50	-0.0738696	0.0738696	P00546	CDC28	Cyclin-dependent kinase 1	CDK1_YEAST	9	-3.39072	0.966093	40 min	0 min
40 min / 0 min	P00549	P00549	0.120559	0.120559	0.477382	470	0.108827	0.108827	P00549	CDC19	Pyruvate kinase 1	KPYK1_YEAST	53	8.71562	1.08716	40 min	0 min
40 min / 0 min	P00560	P00560	0.120856	0.120856	2.5184e-05	314	0.381264	0.381264	P00560	PGK1	Phosphoglycerate kinase	PGK_YEAST	41	8.73799	1.08738	40 min	0 min
40 min / 0 min	P00572	P00572	-0.0875833	0.0875833	0.572764	10	-0.140246	0.140246	P00572	CDC8	Thymidylate kinase	KTHY_YEAST	2	-5.89021	0.941098	40 min	0 min
40 min / 0 min	P00724	P00724	-0.00313747	0.00313747	0.558394	40	-0.0742026	0.0742026	P00724	SUC2	Invertase 2	INV2_YEAST	8	-0.217237	0.997828	40 min	0 min
40 min / 0 min	P00729	P00729	-0.0699652	0.0699652	0.701271	25	0.108423	0.108423	P00729	PRC1	Carboxypeptidase Y	CBPY_YEAST	5	-4.7339	0.952661	40 min	0 min
40 min / 0 min	P00812	P00812	-0.118478	0.118478	0.448551	70	-0.174337	0.174337	P00812	CAR1	Arginase	ARGI_YEAST	10	-7.88412	0.921159	40 min	0 min
40 min / 0 min	P00815	P00815	-0.0530821	0.0530821	0.476414	360	-0.122683	0.122683	P00815	HIS4	Histidine biosynthesis trifunctional protein	HIS2_YEAST	47	-3.61251	0.963875	40 min	0 min
40 min / 0 min	P00817	P00817	0.0942135	0.0942135	0.349321	180	0.248994	0.248994	P00817	IPP1	Inorganic pyrophosphatase	IPYR_YEAST	24	6.74833	1.06748	40 min	0 min
40 min / 0 min	P00830	P00830	0.128881	0.128881	0.380721	170	0.23536	0.23536	P00830	ATP2	ATP synthase subunit beta, mitochondrial	ATPB_YEAST	23	9.34453	1.09345	40 min	0 min
40 min / 0 min	P00890	P00890	0.150174	0.150174	0.000126353	120	0.213553	0.213553	P00890	CIT1	Citrate synthase, mitochondrial	CISY1_YEAST	19	10.9703	1.1097	40 min	0 min
40 min / 0 min	P00899	P00899	-0.00146116	0.00146116	0.788453	180	0.00237913	0.00237913	P00899	TRP2	Anthranilate synthase component 1	TRPE_YEAST	25	-0.101229	0.998988	40 min	0 min
40 min / 0 min	P00912	P00912	-0.107335	0.107335	0.589261	10	-0.152295	0.152295	P00912	TRP1	N-(5'-phosphoribosyl)anthranilate isomerase	TRPF_YEAST	2	-7.16987	0.928301	40 min	0 min
40 min / 0 min	P00924	P00924	0.124795	0.124795	0.0261745	245	0.220922	0.220922	P00924	ENO1	Enolase 1	ENO1_YEAST	29	9.03531	1.09035	40 min	0 min
40 min / 0 min	P00925	P00925	0.169412	0.169412	0.0380158	295	0.266341	0.266341	P00925	ENO2	Enolase 2	ENO2_YEAST	23	12.46	1.1246	40 min	0 min
40 min / 0 min	P00927	P00927	-0.0246733	0.0246733	0.558404	205	-0.0668121	0.0668121	P00927	ILV1	Threonine dehydratase, mitochondrial	THDH_YEAST	30	-1.69568	0.983043	40 min	0 min
40 min / 0 min	P00931	P00931	-0.0176109	0.0176109	0.448551	275	0.158483	0.158483	P00931	TRP5	Tryptophan synthase	TRP_YEAST	41	-1.21327	0.987867	40 min	0 min
40 min / 0 min	P00937	P00937	-0.128678	0.128678	0.708021	147	0.0403853	0.0403853	P00937	TRP3	Multifunctional tryptophan biosynthesis protein	TRPG_YEAST	22	-8.5331	0.914669	40 min	0 min
40 min / 0 min	P00942	P00942	0.0579695	0.0579695	0.618277	115	0.08504	0.08504	P00942	TPI1	Triosephosphate isomerase	TPIS_YEAST	18	4.09996	1.041	40 min	0 min
40 min / 0 min	P00950	P00950	0.126882	0.126882	0.704293	135	0.0787473	0.0787473	P00950	GPM1	Phosphoglycerate mutase 1	PMG1_YEAST	19	9.19312	1.09193	40 min	0 min
40 min / 0 min	P00958	P00958	0.0613397	0.0613397	0.663764	240	0.0564407	0.0564407	P00958	MES1	Methionine--tRNA ligase, cytoplasmic	SYMC_YEAST	37	4.34342	1.04343	40 min	0 min
40 min / 0 min	P01097	P01097	0.173042	0.173042	0.473526	10	0.364746	0.364746	P01097	INH1	ATPase inhibitor, mitochondrial	ATIF_YEAST	2	12.7433	1.12743	40 min	0 min
40 min / 0 min	P01098	P01098	-0.570224	0.570224	0.579099	10	-1.59471	1.59471	P01098	STF1	ATPase-stabilizing factor 9 kDa, mitochondrial	STF1_YEAST	2	-32.6488	0.673512	40 min	0 min
40 min / 0 min	P01119	P01119	-0.0346048	0.0346048	0.715319	40	-0.117666	0.117666	P01119	RAS1	Ras-like protein 1	RAS1_YEAST	7	-2.37008	0.976299	40 min	0 min
40 min / 0 min	P01120	P01120	-0.0426028	0.0426028	0.331942	70	-0.188218	0.188218	P01120	RAS2	Ras-like protein 2	RAS2_YEAST	10	-2.90983	0.970902	40 min	0 min
40 min / 0 min	P01123	P01123	-0.00977788	0.00977788	0.642571	50	-0.0567425	0.0567425	P01123	YPT1	GTP-binding protein YPT1	YPT1_YEAST	8	-0.67546	0.993245	40 min	0 min
40 min / 0 min	P02293;P02294	P02293;P02294	0.0942856	0.0942856	0.5055	40	-0.66849	0.66849	P02293;P02294	HTB1;HTB2	Histone H2B.1;Histone H2B.2	H2B1_YEAST;H2B2_YEAST	5	6.75366	1.06754	40 min	0 min
40 min / 0 min	P02309	P02309	-0.073491	0.073491	0.645935	70	-0.127822	0.127822	P02309	HHF1	Histone H4	H4_YEAST	11	-4.96644	0.950336	40 min	0 min
40 min / 0 min	P02381	P02381	0.0264173	0.0264173	0.765318	5	0.0293138	0.0293138	P02381	VAR1	Ribosomal protein VAR1, mitochondrial	RMAR_YEAST	2	1.84797	1.01848	40 min	0 min
40 min / 0 min	P02400	P02400	-0.154452	0.154452	0.684995	50	-0.0971343	0.0971343	P02400	RPP2B	60S acidic ribosomal protein P2-beta	RLA4_YEAST	7	-10.1526	0.898474	40 min	0 min
40 min / 0 min	P02406	P02406	0.0789036	0.0789036	0.529915	80	0.368351	0.368351	P02406	RPL28	60S ribosomal protein L28	RL28_YEAST	11	5.62151	1.05622	40 min	0 min
40 min / 0 min	P02407;P14127	P02407;P14127	0.105594	0.105594	0.594615	80	0.0702051	0.0702051	P02407;P14127	RPS17A;RPS17B	40S ribosomal protein S17-A;40S ribosomal protein S17-B	RS17A_YEAST;RS17B_YEAST	9	7.59377	1.07594	40 min	0 min
40 min / 0 min	P02557	P02557	0.168751	0.168751	0.643346	115	0.0501058	0.0501058	P02557	TUB2	Tubulin beta chain	TBB_YEAST	16	12.4085	1.12408	40 min	0 min
40 min / 0 min	P02829	P02829	0.118718	0.118718	0.331942	50	0.218668	0.218668	P02829	HSP82	ATP-dependent molecular chaperone HSP82	HSP82_YEAST	7	8.57694	1.08577	40 min	0 min
40 min / 0 min	P02992	P02992	0.0204028	0.0204028	0.387147	115	0.36412	0.36412	P02992	TUF1	Elongation factor Tu, mitochondrial	EFTU_YEAST	15	1.42426	1.01424	40 min	0 min
40 min / 0 min	P02994	P02994	0.0929147	0.0929147	0.0516838	315	0.191608	0.191608	P02994	TEF1	Elongation factor 1-alpha	EF1A_YEAST	36	6.65228	1.06652	40 min	0 min
40 min / 0 min	P03874	P03874	-0.133745	0.133745	0.706491	5	-0.115283	0.115283	P03874	CBP2	Cytochrome B pre-mRNA-processing protein 2	CBP2_YEAST	1	-8.85379	0.911462	40 min	0 min
40 min / 0 min	P03965	P03965	-0.0571483	0.0571483	0.354571	485	-0.0658233	0.0658233	P03965	CPA2	Carbamoyl-phosphate synthase arginine-specific large chain	CARB_YEAST	64	-3.88378	0.961162	40 min	0 min
40 min / 0 min	P04037	P04037	-0.165752	0.165752	0.642167	45	-0.0775388	0.0775388	P04037	COX4	Cytochrome c oxidase subunit 4, mitochondrial	COX4_YEAST	6	-10.8536	0.891464	40 min	0 min
40 min / 0 min	P04046	P04046	0.0450905	0.0450905	0.537638	210	0.0692456	0.0692456	P04046	ADE4	Amidophosphoribosyltransferase	PUR1_YEAST	26	3.17479	1.03175	40 min	0 min
40 min / 0 min	P04050	P04050	0.160212	0.160212	0.202632	290	0.162533	0.162533	P04050	RPO21	DNA-directed RNA polymerase II subunit RPB1	RPB1_YEAST	47	11.7452	1.11745	40 min	0 min
40 min / 0 min	P04051	P04051	0.0835768	0.0835768	0.0971056	140	0.284327	0.284327	P04051	RPO31	DNA-directed RNA polymerase III subunit RPC1	RPC1_YEAST	27	5.96419	1.05964	40 min	0 min
40 min / 0 min	P04076	P04076	-0.146139	0.146139	0.657551	205	0.0842966	0.0842966	P04076	ARG4	Argininosuccinate lyase	ARLY_YEAST	27	-9.63343	0.903666	40 min	0 min
40 min / 0 min	P04147	P04147	0.0530465	0.0530465	0.500885	235	0.0989717	0.0989717	P04147	PAB1	Polyadenylate-binding protein, cytoplasmic and nuclear	PABP_YEAST	36	3.74534	1.03745	40 min	0 min
40 min / 0 min	P04161	P04161	-0.138711	0.138711	0.716789	55	0.0902591	0.0902591	P04161	ADE8	Phosphoribosylglycinamide formyltransferase	PUR3_YEAST	8	-9.16697	0.90833	40 min	0 min
40 min / 0 min	P04449	P04449	0.178561	0.178561	0.554975	95	0.135468	0.135468	P04449	RPL24A	60S ribosomal protein L24-A	RL24A_YEAST	13	13.1754	1.13175	40 min	0 min
40 min / 0 min	P04456	P04456	-0.0237356	0.0237356	0.585414	90	0.11624	0.11624	P04456	RPL25	60S ribosomal protein L25	RL25_YEAST	11	-1.63177	0.983682	40 min	0 min
40 min / 0 min	P04650	P04650	0.16182	0.16182	0.518501	20	0.144834	0.144834	P04650	RPL39	60S ribosomal protein L39	RL39_YEAST	3	11.8698	1.1187	40 min	0 min
40 min / 0 min	P04710	P04710	0.136695	0.136695	0.65449	20	-0.323772	0.323772	P04710	AAC1	ADP,ATP carrier protein 1	ADT1_YEAST	3	9.93835	1.09938	40 min	0 min
40 min / 0 min	P04786	P04786	0.00483823	0.00483823	0.733909	75	0.0424232	0.0424232	P04786	TOP1	DNA topoisomerase 1	TOP1_YEAST	14	0.335923	1.00336	40 min	0 min
40 min / 0 min	P04801	P04801	0.034272	0.034272	0.678335	275	0.0313857	0.0313857	P04801	THS1	Threonine--tRNA ligase, cytoplasmic	SYTC_YEAST	39	2.404	1.02404	40 min	0 min
40 min / 0 min	P04802	P04802	-0.00143079	0.00143079	0.590518	265	-0.0558443	0.0558443	P04802	DPS1	Aspartate--tRNA ligase, cytoplasmic	SYDC_YEAST	41	-0.0991256	0.999009	40 min	0 min
40 min / 0 min	P04803	P04803	-0.110069	0.110069	0.742096	20	-0.066145	0.066145	P04803	MSW1	Tryptophan--tRNA ligase, mitochondrial	SYWM_YEAST	4	-7.34562	0.926544	40 min	0 min
40 min / 0 min	P04806	P04806	0.116319	0.116319	0.448551	110	0.24544	0.24544	P04806	HXK1	Hexokinase-1	HXKA_YEAST	18	8.39658	1.08397	40 min	0 min
40 min / 0 min	P04807	P04807	0.0527952	0.0527952	0.629863	245	0.0399544	0.0399544	P04807	HXK2	Hexokinase-2	HXKB_YEAST	25	3.72727	1.03727	40 min	0 min
40 min / 0 min	P04817	P04817	0.0754414	0.0754414	0.754101	25	-0.0312468	0.0312468	P04817	CAN1	Arginine permease	CAN1_YEAST	5	5.36833	1.05368	40 min	0 min
40 min / 0 min	P04819	P04819	0.139942	0.139942	0.618277	10	0.117867	0.117867	P04819	CDC9	DNA ligase 1	DNLI1_YEAST	2	10.1861	1.10186	40 min	0 min
40 min / 0 min	P04821	P04821	0.165786	0.165786	0.535423	15	0.522575	0.522575	P04821	CDC25	Cell division control protein 25	CDC25_YEAST	3	12.1777	1.12178	40 min	0 min
40 min / 0 min	P04840	P04840	-0.00352008	0.00352008	0.473526	125	-0.116435	0.116435	P04840	POR1	Mitochondrial outer membrane protein porin 1	VDAC1_YEAST	21	-0.243696	0.997563	40 min	0 min
40 min / 0 min	P04911;P04912	P04911;P04912	0.0197208	0.0197208	0.686071	15	0.0368737	0.0368737	P04911;P04912	HTA1;HTA2	Histone H2A.1;Histone H2A.2	H2A1_YEAST;H2A2_YEAST	3	1.37633	1.01376	40 min	0 min
40 min / 0 min	P05030	P05030	0.0582068	0.0582068	0.25233	325	0.127674	0.127674	P05030	PMA1	Plasma membrane ATPase 1	PMA1_YEAST	36	4.11708	1.04117	40 min	0 min
40 min / 0 min	P05150	P05150	-0.195049	0.195049	0.61376	115	-0.0677685	0.0677685	P05150	ARG3	Ornithine carbamoyltransferase	OTC_YEAST	15	-12.6457	0.873543	40 min	0 min
40 min / 0 min	P05317	P05317	0.0417929	0.0417929	0.731086	90	-0.0658515	0.0658515	P05317	RPP0	60S acidic ribosomal protein P0	RLA0_YEAST	12	2.93923	1.02939	40 min	0 min
40 min / 0 min	P05318	P05318	-0.187565	0.187565	0.517418	10	-0.177161	0.177161	P05318	RPP1A	60S acidic ribosomal protein P1-alpha	RLA1_YEAST	2	-12.1914	0.878086	40 min	0 min
40 min / 0 min	P05319	P05319	0.00316047	0.00316047	0.756677	30	-0.0147388	0.0147388	P05319	RPP2A	60S acidic ribosomal protein P2-alpha	RLA2_YEAST	6	0.219307	1.00219	40 min	0 min
40 min / 0 min	P05373	P05373	-0.0456337	0.0456337	0.585078	55	-0.0821888	0.0821888	P05373	HEM2	Delta-aminolevulinic acid dehydratase	HEM2_YEAST	8	-3.11359	0.968864	40 min	0 min
40 min / 0 min	P05374	P05374	-0.057264	0.057264	0.680582	140	-0.0976908	0.0976908	P05374	CHO2	Phosphatidylethanolamine N-methyltransferase	CHO2_YEAST	25	-3.89149	0.961085	40 min	0 min
40 min / 0 min	P05375	P05375	0.0959482	0.0959482	0.741916	15	-0.139072	0.139072	P05375	OPI3	Phosphatidyl-N-methylethanolamine N-methyltransferase	PEM2_YEAST	3	6.87676	1.06877	40 min	0 min
40 min / 0 min	P05453	P05453	0.159299	0.159299	0.588824	165	0.042346	0.042346	P05453	SUP35	Eukaryotic peptide chain release factor GTP-binding subunit	ERF3_YEAST	22	11.6744	1.11674	40 min	0 min
40 min / 0 min	P05626	P05626	0.0937001	0.0937001	0.783611	80	-0.0259033	0.0259033	P05626	ATP4	ATP synthase subunit 4, mitochondrial	ATPF_YEAST	13	6.71035	1.0671	40 min	0 min
40 min / 0 min	P05694	P05694	0.223313	0.223313	6.32415e-05	425	0.229421	0.229421	P05694	MET6	5-methyltetrahydropteroyltriglutamate--homocysteine methyltransferase	METE_YEAST	54	16.7412	1.16741	40 min	0 min
40 min / 0 min	P05737	P05737	0.0659172	0.0659172	0.678035	120	0.0726385	0.0726385	P05737	RPL7A	60S ribosomal protein L7-A	RL7A_YEAST	18	4.67502	1.04675	40 min	0 min
40 min / 0 min	P05738	P05738	0.0917019	0.0917019	0.637188	82	0.15293	0.15293	P05738	RPL9A	60S ribosomal protein L9-A	RL9A_YEAST	12	6.56266	1.06563	40 min	0 min
40 min / 0 min	P05739	P05739	0.0112897	0.0112897	0.582073	50	0.112767	0.112767	P05739	RPL6B	60S ribosomal protein L6-B	RL6B_YEAST	8	0.78561	1.00786	40 min	0 min
40 min / 0 min	P05740	P05740	-0.0115877	0.0115877	0.72361	85	-0.0816808	0.0816808	P05740	RPL17A	60S ribosomal protein L17-A	RL17A_YEAST	10	-0.79998	0.992	40 min	0 min
40 min / 0 min	P05743	P05743	0.053325	0.053325	0.599576	110	0.0591649	0.0591649	P05743	RPL26A	60S ribosomal protein L26-A	RL26A_YEAST	15	3.76536	1.03765	40 min	0 min
40 min / 0 min	P05744	P05744	-0.082457	0.082457	0.682877	40	0.0641312	0.0641312	P05744	RPL33A	60S ribosomal protein L33-A	RL33A_YEAST	7	-5.55522	0.944448	40 min	0 min
40 min / 0 min	P05745	P05745	0.161638	0.161638	0.529083	65	0.124893	0.124893	P05745	RPL36A	60S ribosomal protein L36-A	RL36A_YEAST	7	11.8556	1.11856	40 min	0 min
40 min / 0 min	P05747	P05747	0.222095	0.222095	0.616793	5	0.276329	0.276329	P05747	RPL29	60S ribosomal protein L29	RL29_YEAST	1	16.6426	1.16643	40 min	0 min
40 min / 0 min	P05748	P05748	0.0163583	0.0163583	0.519869	70	0.0898077	0.0898077	P05748	RPL15A	60S ribosomal protein L15-A	RL15A_YEAST	11	1.14032	1.0114	40 min	0 min
40 min / 0 min	P05749	P05749	0.10256	0.10256	0.559445	20	0.211642	0.211642	P05749	RPL22A	60S ribosomal protein L22-A	RL22A_YEAST	4	7.36772	1.07368	40 min	0 min
40 min / 0 min	P05750	P05750	-0.0876247	0.0876247	0.578723	145	-0.114798	0.114798	P05750	RPS3	40S ribosomal protein S3	RS3_YEAST	20	-5.89291	0.941071	40 min	0 min
40 min / 0 min	P05755	P05755	0.0660905	0.0660905	0.684687	104	0.0959007	0.0959007	P05755	RPS9B	40S ribosomal protein S9-B	RS9B_YEAST	17	4.6876	1.04688	40 min	0 min
40 min / 0 min	P05756	P05756	0.0724633	0.0724633	0.588889	65	0.132964	0.132964	P05756	RPS13	40S ribosomal protein S13	RS13_YEAST	10	5.15105	1.05151	40 min	0 min
40 min / 0 min	P05759	P05759	-0.037923	0.037923	0.538212	40	0.172813	0.172813	P05759	RPS31	Ubiquitin-40S ribosomal protein S31	RS27A_YEAST	5	-2.59437	0.974056	40 min	0 min
40 min / 0 min	P05986	P05986	0.128531	0.128531	0.60084	10	0.15011	0.15011	P05986	TPK3	cAMP-dependent protein kinase type 3	KAPC_YEAST	2	9.31799	1.09318	40 min	0 min
40 min / 0 min	P06100	P06100	-0.109626	0.109626	0.616383	10	-0.113313	0.113313	P06100	CDC36	General negative regulator of transcription subunit 2	NOT2_YEAST	2	-7.31717	0.926828	40 min	0 min
40 min / 0 min	P06101	P06101	-0.169095	0.169095	0.699799	100	-0.0451442	0.0451442	P06101	CDC37	Hsp90 co-chaperone Cdc37	CDC37_YEAST	18	-11.0599	0.889401	40 min	0 min
40 min / 0 min	P06102	P06102	0.0491666	0.0491666	0.608475	80	0.0551084	0.0551084	P06102	NOT3	General negative regulator of transcription subunit 3	NOT3_YEAST	16	3.46671	1.03467	40 min	0 min
40 min / 0 min	P06103	P06103	0.0454801	0.0454801	0.490621	225	0.107108	0.107108	P06103	PRT1	Eukaryotic translation initiation factor 3 subunit B	EIF3B_YEAST	35	3.20266	1.03203	40 min	0 min
40 min / 0 min	P06104	P06104	0.0356174	0.0356174	0.753926	10	0.20135	0.20135	P06104	RAD6	Ubiquitin-conjugating enzyme E2 2	UBC2_YEAST	1	2.49954	1.025	40 min	0 min
40 min / 0 min	P06105	P06105	0.150365	0.150365	0.0282669	445	0.181059	0.181059	P06105	SCP160	Protein SCP160	SC160_YEAST	68	10.985	1.10985	40 min	0 min
40 min / 0 min	P06115	P06115	-0.114038	0.114038	0.624797	10	-0.170555	0.170555	P06115	CTT1	Catalase T	CATT_YEAST	2	-7.60019	0.923998	40 min	0 min
40 min / 0 min	P06168	P06168	0.0600709	0.0600709	0.724854	234	0.0357992	0.0357992	P06168	ILV5	Ketol-acid reductoisomerase, mitochondrial	ILV5_YEAST	27	4.2517	1.04252	40 min	0 min
40 min / 0 min	P06169	P06169	0.0431051	0.0431051	0.715182	313	-0.04534	0.04534	P06169	PDC1	Pyruvate decarboxylase isozyme 1	PDC1_YEAST	33	3.0329	1.03033	40 min	0 min
40 min / 0 min	P06174	P06174	0.0366935	0.0366935	0.588889	15	0.159403	0.159403	P06174	HEM4	Uroporphyrinogen-III synthase	HEM4_YEAST	3	2.57602	1.02576	40 min	0 min
40 min / 0 min	P06182	P06182	0.506758	0.506758	0.617755	15	0.584216	0.584216	P06182	CYC3	Cytochrome c heme lyase	CCHL_YEAST	2	42.0854	1.42085	40 min	0 min
40 min / 0 min	P06197	P06197	-0.0526908	0.0526908	0.61376	25	0.191585	0.191585	P06197	PIS1	CDP-diacylglycerol--inositol 3-phosphatidyltransferase	PIS_YEAST	5	-3.58636	0.964136	40 min	0 min
40 min / 0 min	P06208	P06208	0.0193962	0.0193962	0.708164	255	0.0254668	0.0254668	P06208	LEU4	2-isopropylmalate synthase	LEU1_YEAST	38	1.35352	1.01354	40 min	0 min
40 min / 0 min	P06242	P06242	0.390293	0.390293	0.586606	10	0.529031	0.529031	P06242	KIN28	Serine/threonine-protein kinase KIN28	KIN28_YEAST	2	31.0659	1.31066	40 min	0 min
40 min / 0 min	P06244	P06244	0.0268101	0.0268101	0.585673	20	-0.212343	0.212343	P06244	TPK1	cAMP-dependent protein kinase type 1	KAPA_YEAST	4	1.87571	1.01876	40 min	0 min
40 min / 0 min	P06245	P06245	1.02113	1.02113	0.423513	15	1.23095	1.23095	P06245	TPK2	cAMP-dependent protein kinase type 2	KAPB_YEAST	3	102.951	2.02951	40 min	0 min
40 min / 0 min	P06634	P06634	-0.00496967	0.00496967	0.328686	255	-0.219115	0.219115	P06634	DED1	ATP-dependent RNA helicase DED1	DED1_YEAST	30	-0.343879	0.996561	40 min	0 min
40 min / 0 min	P06700	P06700	0.170533	0.170533	0.610718	20	0.261417	0.261417	P06700	SIR2	NAD-dependent histone deacetylase SIR2	SIR2_YEAST	3	12.5474	1.12547	40 min	0 min
40 min / 0 min	P06701	P06701	0.0350796	0.0350796	0.662424	10	-0.203103	0.203103	P06701	SIR3	Regulatory protein SIR3	SIR3_YEAST	2	2.46133	1.02461	40 min	0 min
40 min / 0 min	P06704	P06704	-0.0825387	0.0825387	0.689091	25	0.123853	0.123853	P06704	CDC31	Cell division control protein 31	CDC31_YEAST	3	-5.56056	0.944394	40 min	0 min
40 min / 0 min	P06738	P06738	0.0735392	0.0735392	0.565358	35	0.115513	0.115513	P06738	GPH1	Glycogen phosphorylase	PHSG_YEAST	7	5.2295	1.0523	40 min	0 min
40 min / 0 min	P06773	P06773	0.0229926	0.0229926	0.796288	10	0.00674496	0.00674496	P06773	DCD1	Deoxycytidylate deaminase	DCTD_YEAST	2	1.6065	1.01606	40 min	0 min
40 min / 0 min	P06775	P06775	-0.969293	0.969293	0.0174245	20	-1.02284	1.02284	P06775	HIP1	Histidine permease	HIP1_YEAST	4	-48.9244	0.510756	40 min	0 min
40 min / 0 min	P06776	P06776	0.183664	0.183664	0.497897	15	0.319753	0.319753	P06776	PDE2	3',5'-cyclic-nucleotide phosphodiesterase 2	PDE2_YEAST	3	13.5765	1.13576	40 min	0 min
40 min / 0 min	P06777	P06777	0.0984534	0.0984534	0.689586	5	0.109183	0.109183	P06777	RAD1	DNA repair protein RAD1	RAD1_YEAST	1	7.06251	1.07063	40 min	0 min
40 min / 0 min	P06780	P06780	-0.0121317	0.0121317	0.752401	35	0.0203337	0.0203337	P06780	RHO1	GTP-binding protein RHO1	RHO1_YEAST	7	-0.837382	0.991626	40 min	0 min
40 min / 0 min	P06781	P06781	-0.0492768	0.0492768	0.727765	25	-0.0326247	0.0326247	P06781	RHO2	GTP-binding protein RHO2	RHO2_YEAST	5	-3.35793	0.966421	40 min	0 min
40 min / 0 min	P06782	P06782	0.0425565	0.0425565	0.718213	85	0.0543913	0.0543913	P06782	SNF1	Carbon catabolite-derepressing protein kinase	SNF1_YEAST	13	2.99373	1.02994	40 min	0 min
40 min / 0 min	P06784	P06784	-0.0812379	0.0812379	0.741996	10	0.15281	0.15281	P06784	STE7	Serine/threonine-protein kinase STE7	STE7_YEAST	2	-5.47538	0.945246	40 min	0 min
40 min / 0 min	P06785	P06785	-0.0958167	0.0958167	0.585673	60	-0.194309	0.194309	P06785	CDC21	Thymidylate synthase	TYSY_YEAST	9	-6.42576	0.935742	40 min	0 min
40 min / 0 min	P06786	P06786	0.0658081	0.0658081	0.588824	155	0.0809275	0.0809275	P06786	TOP2	DNA topoisomerase 2	TOP2_YEAST	29	4.6671	1.04667	40 min	0 min
40 min / 0 min	P06787	P06787	-0.0964694	0.0964694	0.367907	45	-0.155319	0.155319	P06787	CMD1	Calmodulin	CALM_YEAST	6	-6.46808	0.935319	40 min	0 min
40 min / 0 min	P06839	P06839	-0.0668722	0.0668722	0.393316	20	-0.122574	0.122574	P06839	RAD3	DNA repair helicase RAD3	RAD3_YEAST	4	-4.52944	0.954706	40 min	0 min
40 min / 0 min	P07143	P07143	0.0142989	0.0142989	0.782212	25	-0.0104337	0.0104337	P07143	CYT1	Cytochrome c1, heme protein, mitochondrial	CY1_YEAST	4	0.996051	1.00996	40 min	0 min
40 min / 0 min	P07149	P07149	0.140774	0.140774	0.0196404	745	0.141679	0.141679	P07149	FAS1	Fatty acid synthase subunit beta	FAS1_YEAST	104	10.2496	1.1025	40 min	0 min
40 min / 0 min	P07170	P07170	0.0124226	0.0124226	0.721548	170	0.0370627	0.0370627	P07170	ADK1	Adenylate kinase	KAD2_YEAST	17	0.864784	1.00865	40 min	0 min
40 min / 0 min	P07172	P07172	-0.0821548	0.0821548	0.327366	85	-0.15171	0.15171	P07172	HIS5	Histidinol-phosphate aminotransferase	HIS8_YEAST	12	-5.53544	0.944646	40 min	0 min
40 min / 0 min	P07213	P07213	0.0946584	0.0946584	0.477382	165	0.0983118	0.0983118	P07213	TOM70	Mitochondrial import receptor subunit TOM70	TOM70_YEAST	26	6.78125	1.06781	40 min	0 min
40 min / 0 min	P07236	P07236	-0.00996936	0.00996936	0.610449	20	0.130339	0.130339	P07236	MST1	Threonine--tRNA ligase, mitochondrial	SYTM_YEAST	4	-0.688641	0.993114	40 min	0 min
40 min / 0 min	P07244	P07244	0.0740083	0.0740083	0.541177	270	0.0774278	0.0774278	P07244	ADE5,7	Bifunctional purine biosynthetic protein ADE5,7	PUR2_YEAST	37	5.26372	1.05264	40 min	0 min
40 min / 0 min	P07245	P07245	0.0462266	0.0462266	0.431727	325	0.0640718	0.0640718	P07245	ADE3	C-1-tetrahydrofolate synthase, cytoplasmic	C1TC_YEAST	51	3.25607	1.03256	40 min	0 min
40 min / 0 min	P07246	P07246	0.0101595	0.0101595	0.654988	95	0.0591982	0.0591982	P07246	ADH3	Alcohol dehydrogenase 3, mitochondrial	ADH3_YEAST	14	0.706691	1.00707	40 min	0 min
40 min / 0 min	P07250	P07250	0.0130982	0.0130982	0.785683	10	-0.0136186	0.0136186	P07250	ARG82	Inositol polyphosphate multikinase	IPMK_YEAST	2	0.912035	1.00912	40 min	0 min
40 min / 0 min	P07251	P07251	0.122304	0.122304	0.205794	175	0.317685	0.317685	P07251	ATP1	ATP synthase subunit alpha, mitochondrial	ATPA_YEAST	24	8.8472	1.08847	40 min	0 min
40 min / 0 min	P07253	P07253	0.323065	0.323065	0.790742	25	-0.0208259	0.0208259	P07253	CBP6	Cytochrome B pre-mRNA-processing protein 6	CBP6_YEAST	5	25.0985	1.25099	40 min	0 min
40 min / 0 min	P07255	P07255	-0.0127952	0.0127952	0.791629	20	-0.00722694	0.00722694	P07255	COX9	Cytochrome c oxidase subunit 7A	COX9_YEAST	4	-0.882975	0.99117	40 min	0 min
40 min / 0 min	P07256	P07256	0.0924793	0.0924793	0.105024	100	0.133376	0.133376	P07256	COR1	Cytochrome b-c1 complex subunit 1, mitochondrial	QCR1_YEAST	17	6.62009	1.0662	40 min	0 min
40 min / 0 min	P07257	P07257	0.00144555	0.00144555	0.61376	170	0.0586778	0.0586778	P07257	QCR2	Cytochrome b-c1 complex subunit 2, mitochondrial	QCR2_YEAST	26	0.100248	1.001	40 min	0 min
40 min / 0 min	P07258	P07258	-0.160457	0.160457	0.0761507	130	-0.22359	0.22359	P07258	CPA1	Carbamoyl-phosphate synthase arginine-specific small chain	CARA_YEAST	19	-10.5259	0.894741	40 min	0 min
40 min / 0 min	P07259	P07259	0.0184926	0.0184926	0.14031	630	0.129134	0.129134	P07259	URA2	Protein URA2	PYR1_YEAST	101	1.29006	1.0129	40 min	0 min
40 min / 0 min	P07260	P07260	0.13119	0.13119	0.501447	105	0.212744	0.212744	P07260	CDC33	Eukaryotic translation initiation factor 4E	IF4E_YEAST	16	9.51969	1.0952	40 min	0 min
40 min / 0 min	P07261	P07261	0.138257	0.138257	0.765115	5	0.115752	0.115752	P07261	GCR1	Glycolytic genes transcriptional activator GCR1	GCR1_YEAST	2	10.0575	1.10057	40 min	0 min
40 min / 0 min	P07262	P07262	0.169392	0.169392	0.00317051	205	0.150311	0.150311	P07262	GDH1	NADP-specific glutamate dehydrogenase 1	DHE4_YEAST	29	12.4584	1.12458	40 min	0 min
40 min / 0 min	P07263	P07263	0.0305756	0.0305756	0.623796	225	0.0796314	0.0796314	P07263	HTS1	Histidine--tRNA ligase, mitochondrial	SYH_YEAST	32	2.14195	1.02142	40 min	0 min
40 min / 0 min	P07264	P07264	-0.0232016	0.0232016	0.451099	395	-0.092361	0.092361	P07264	LEU1	3-isopropylmalate dehydratase	LEUC_YEAST	46	-1.59535	0.984046	40 min	0 min
40 min / 0 min	P07266	P07266	0.224118	0.224118	0.631449	5	0.285714	0.285714	P07266	MRS1	Mitochondrial RNA-splicing protein MRS1	MRS1_YEAST	1	16.8063	1.16806	40 min	0 min
40 min / 0 min	P07267	P07267	-0.00258818	0.00258818	0.57798	90	0.0706618	0.0706618	P07267	PEP4	Saccharopepsin	CARP_YEAST	15	-0.179238	0.998208	40 min	0 min
40 min / 0 min	P07269	P07269	0.028537	0.028537	0.796581	10	-0.0433657	0.0433657	P07269	PHO2	Regulatory protein PHO2	PHO2_YEAST	2	1.99773	1.01998	40 min	0 min
40 min / 0 min	P07270	P07270	0.298587	0.298587	0.639917	5	0.26185	0.26185	P07270	PHO4	Phosphate system positive regulatory protein PHO4	PHO4_YEAST	1	22.9939	1.22994	40 min	0 min
40 min / 0 min	P07273	P07273	-0.120953	0.120953	0.763037	55	-0.059632	0.059632	P07273	DST1	Transcription elongation factor S-II	TFS2_YEAST	11	-8.04201	0.91958	40 min	0 min
40 min / 0 min	P07274	P07274	-0.0600823	0.0600823	0.475345	20	-0.526069	0.526069	P07274	PFY1	Profilin	PROF_YEAST	3	-4.07906	0.959209	40 min	0 min
40 min / 0 min	P07275	P07275	0.0716608	0.0716608	0.755635	80	0.0152166	0.0152166	P07275	PUT2	Delta-1-pyrroline-5-carboxylate dehydrogenase, mitochondrial	PUT2_YEAST	15	5.09258	1.05093	40 min	0 min
40 min / 0 min	P07277	P07277	-0.0185728	0.0185728	0.670966	40	0.0530396	0.0530396	P07277	ERG12	Mevalonate kinase	KIME_YEAST	7	-1.27912	0.987209	40 min	0 min
40 min / 0 min	P07278	P07278	0.0128643	0.0128643	0.786693	105	-0.00595725	0.00595725	P07278	BCY1	cAMP-dependent protein kinase regulatory subunit	KAPR_YEAST	18	0.895672	1.00896	40 min	0 min
40 min / 0 min	P07280;P07281	P07280;P07281	0.0482619	0.0482619	0.591435	70	0.0630841	0.0630841	P07280;P07281	RPS19A;RPS19B	40S ribosomal protein S19-A;40S ribosomal protein S19-B	RS19A_YEAST;RS19B_YEAST	10	3.40184	1.03402	40 min	0 min
40 min / 0 min	P07283	P07283	0.0233087	0.0233087	0.745575	110	0.0135929	0.0135929	P07283	SEC53	Phosphomannomutase	PMM_YEAST	18	1.62876	1.01629	40 min	0 min
40 min / 0 min	P07284	P07284	0.0329505	0.0329505	0.134491	255	0.142654	0.142654	P07284	SES1	Serine--tRNA ligase, cytoplasmic	SYSC_YEAST	38	2.31024	1.0231	40 min	0 min
40 min / 0 min	P07285	P07285	-0.134779	0.134779	0.742194	80	-0.0403787	0.0403787	P07285	TRP4	Anthranilate phosphoribosyltransferase	TRPD_YEAST	12	-8.91906	0.910809	40 min	0 min
40 min / 0 min	P07342	P07342	-0.00139977	0.00139977	0.502644	245	0.133008	0.133008	P07342	ILV2	Acetolactate synthase catalytic subunit, mitochondrial	ILVB_YEAST	31	-0.0969774	0.99903	40 min	0 min
40 min / 0 min	P07347	P07347	-0.093244	0.093244	0.604903	55	-0.0923693	0.0923693	P07347	ARD1	N-terminal acetyltransferase A complex catalytic subunit ARD1	ARD1_YEAST	10	-6.25874	0.937413	40 min	0 min
40 min / 0 min	P07560	P07560	0.00544298	0.00544298	0.569247	50	0.457333	0.457333	P07560	SEC4	Ras-related protein SEC4	SEC4_YEAST	10	0.377991	1.00378	40 min	0 min
40 min / 0 min	P07702	P07702	-0.0556822	0.0556822	0.788141	530	-0.00262369	0.00262369	P07702	LYS2	L-aminoadipate-semialdehyde dehydrogenase	LYS2_YEAST	82	-3.78607	0.962139	40 min	0 min
40 min / 0 min	P07703	P07703	-0.0384647	0.0384647	0.570279	70	0.14344	0.14344	P07703	RPC40	DNA-directed RNA polymerases I and III subunit RPAC1	RPAC1_YEAST	9	-2.63094	0.973691	40 min	0 min
40 min / 0 min	P07806	P07806	0.0901844	0.0901844	0.55047	400	0.0833476	0.0833476	P07806	VAS1	Valine--tRNA ligase, mitochondrial	SYV_YEAST	59	6.45062	1.06451	40 min	0 min
40 min / 0 min	P07807	P07807	0.00901463	0.00901463	0.678035	10	0.0993407	0.0993407	P07807	DFR1	Dihydrofolate reductase	DYR_YEAST	2	0.626803	1.00627	40 min	0 min
40 min / 0 min	P07834	P07834	0.104012	0.104012	0.542846	15	0.55127	0.55127	P07834	CDC4	Cell division control protein 4	CDC4_YEAST	3	7.47584	1.07476	40 min	0 min
40 min / 0 min	P07884	P07884	-0.0669196	0.0669196	0.793693	5	-0.0589304	0.0589304	P07884	MOD5	tRNA dimethylallyltransferase, mitochondrial	MOD5_YEAST	1	-4.53258	0.954674	40 min	0 min
40 min / 0 min	P07991	P07991	-0.107414	0.107414	0.555823	100	-0.0700732	0.0700732	P07991	CAR2	Ornithine aminotransferase	OAT_YEAST	15	-7.17496	0.92825	40 min	0 min
40 min / 0 min	P08004	P08004	-0.04185	0.04185	0.620607	40	0.165391	0.165391	P08004	CHS1	Chitin synthase 1	CHS1_YEAST	8	-2.85915	0.971409	40 min	0 min
40 min / 0 min	P08018	P08018	0.00769218	0.00769218	0.769149	30	-0.0246114	0.0246114	P08018	PBS2	MAP kinase kinase PBS2	PBS2_YEAST	5	0.534605	1.00535	40 min	0 min
40 min / 0 min	P08067	P08067	0.169617	0.169617	0.60107	35	0.153136	0.153136	P08067	RIP1	Cytochrome b-c1 complex subunit Rieske, mitochondrial	UCRI_YEAST	7	12.476	1.12476	40 min	0 min
40 min / 0 min	P08153	P08153	-0.575459	0.575459	0.774996	10	-0.0766905	0.0766905	P08153	SWI5	Transcriptional factor SWI5	SWI5_YEAST	2	-32.8927	0.671073	40 min	0 min
40 min / 0 min	P08417	P08417	0.0802341	0.0802341	0.568572	145	0.115161	0.115161	P08417	FUM1	Fumarate hydratase, mitochondrial	FUMH_YEAST	22	5.71896	1.05719	40 min	0 min
40 min / 0 min	P08425	P08425	-0.0308351	0.0308351	0.752875	5	0.136939	0.136939	P08425	MSF1	Phenylalanine--tRNA ligase, mitochondrial	SYFM_YEAST	1	-2.11465	0.978854	40 min	0 min
40 min / 0 min	P08432	P08432	-0.198116	0.198116	0.737059	20	-0.137082	0.137082	P08432	SPE1	Ornithine decarboxylase	DCOR_YEAST	4	-12.8312	0.871688	40 min	0 min
40 min / 0 min	P08456	P08456	-0.154068	0.154068	0.547105	35	0.296502	0.296502	P08456	CHO1	CDP-diacylglycerol--serine O-phosphatidyltransferase	PSS_YEAST	4	-10.1287	0.898713	40 min	0 min
40 min / 0 min	P08466	P08466	-0.131582	0.131582	0.129999	30	-0.173927	0.173927	P08466	NUC1	Mitochondrial nuclease	NUC1_YEAST	6	-8.71702	0.91283	40 min	0 min
40 min / 0 min	P08518	P08518	0.175214	0.175214	0.0159805	255	0.440783	0.440783	P08518	RPB2	DNA-directed RNA polymerase II subunit RPB2	RPB2_YEAST	35	12.9132	1.12913	40 min	0 min
40 min / 0 min	P08524	P08524	0.0566361	0.0566361	0.595441	110	0.148192	0.148192	P08524	ERG20	Farnesyl pyrophosphate synthase	FPPS_YEAST	18	4.00379	1.04004	40 min	0 min
40 min / 0 min	P08525	P08525	-0.204568	0.204568	0.640695	10	-0.205936	0.205936	P08525	QCR8	Cytochrome b-c1 complex subunit 8	QCR8_YEAST	2	-13.2201	0.867799	40 min	0 min
40 min / 0 min	P08539	P08539	-0.120868	0.120868	0.517418	45	-0.13841	0.13841	P08539	GPA1	Guanine nucleotide-binding protein alpha-1 subunit	GPA1_YEAST	9	-8.03657	0.919634	40 min	0 min
40 min / 0 min	P08566	P08566	-0.00730636	0.00730636	0.732647	585	0.0135675	0.0135675	P08566	ARO1	Pentafunctional AROM polypeptide	ARO1_YEAST	87	-0.505158	0.994948	40 min	0 min
40 min / 0 min	P08678	P08678	0.0409421	0.0409421	0.551309	45	0.184237	0.184237	P08678	CYR1	Adenylate cyclase	CYAA_YEAST	9	2.87854	1.02879	40 min	0 min
40 min / 0 min	P08679	P08679	-0.10772	0.10772	0.55261	120	-0.252732	0.252732	P08679	CIT2	Citrate synthase, peroxisomal	CISY2_YEAST	19	-7.19465	0.928054	40 min	0 min
40 min / 0 min	P08964	P08964	-0.064591	0.064591	0.648571	65	0.0546573	0.0546573	P08964	MYO1	Myosin-1	MYO1_YEAST	13	-4.37836	0.956216	40 min	0 min
40 min / 0 min	P09032	P09032	-0.0708737	0.0708737	0.651516	55	-0.15168	0.15168	P09032	GCD1	Translation initiation factor eIF-2B subunit gamma	EI2BG_YEAST	10	-4.79388	0.952061	40 min	0 min
40 min / 0 min	P09064	P09064	0.11051	0.11051	0.787458	130	-0.00951793	0.00951793	P09064	SUI3	Eukaryotic translation initiation factor 2 subunit beta	IF2B_YEAST	21	7.96096	1.07961	40 min	0 min
40 min / 0 min	P09232	P09232	0.0394165	0.0394165	0.354473	50	0.219564	0.219564	P09232	PRB1	Cerevisin	PRTB_YEAST	9	2.76981	1.0277	40 min	0 min
40 min / 0 min	P09436	P09436	0.103192	0.103192	0.511142	478	0.0902625	0.0902625	P09436	ILS1	Isoleucine--tRNA ligase, cytoplasmic	SYIC_YEAST	66	7.41472	1.07415	40 min	0 min
40 min / 0 min	P09440	P09440	0.148832	0.148832	0.611898	150	0.102647	0.102647	P09440	MIS1	C-1-tetrahydrofolate synthase, mitochondrial	C1TM_YEAST	29	10.8671	1.10867	40 min	0 min
40 min / 0 min	P09457	P09457	0.134641	0.134641	0.107891	85	0.193004	0.193004	P09457	ATP5	ATP synthase subunit 5, mitochondrial	ATPO_YEAST	12	9.78199	1.09782	40 min	0 min
40 min / 0 min	P09547	P09547	0.361808	0.361808	0.0898438	15	0.355929	0.355929	P09547	SWI1	SWI/SNF chromatin-remodeling complex subunit SWI1	SWI1_YEAST	3	28.5035	1.28503	40 min	0 min
40 min / 0 min	P09620	P09620	-0.0959253	0.0959253	0.581749	40	-0.113636	0.113636	P09620	KEX1	Pheromone-processing carboxypeptidase KEX1	KEX1_YEAST	9	-6.43281	0.935672	40 min	0 min
40 min / 0 min	P09624	P09624	-0.0344018	0.0344018	0.568973	175	0.127698	0.127698	P09624	LPD1	Dihydrolipoyl dehydrogenase, mitochondrial	DLDH_YEAST	26	-2.35634	0.976437	40 min	0 min
40 min / 0 min	P09733	P09733	0.0943203	0.0943203	0.784667	110	0.0124557	0.0124557	P09733	TUB1	Tubulin alpha-1 chain	TBA1_YEAST	15	6.75623	1.06756	40 min	0 min
40 min / 0 min	P09734	P09734	0.0906744	0.0906744	0.799879	45	0.000834755	0.000834755	P09734	TUB3	Tubulin alpha-3 chain	TBA3_YEAST	8	6.48678	1.06487	40 min	0 min
40 min / 0 min	P09880	P09880	-0.157756	0.157756	0.743953	45	0.0302026	0.0302026	P09880	TRL1	tRNA ligase	TRNL_YEAST	9	-10.3582	0.896418	40 min	0 min
40 min / 0 min	P09938	P09938	0.0414741	0.0414741	0.526868	130	0.115848	0.115848	P09938	RNR2	Ribonucleoside-diphosphate reductase small chain 1	RIR2_YEAST	19	2.91649	1.02916	40 min	0 min
40 min / 0 min	P09950	P09950	-0.0478276	0.0478276	0.756384	70	-0.016401	0.016401	P09950	HEM1	5-aminolevulinate synthase, mitochondrial	HEM1_YEAST	12	-3.26081	0.967392	40 min	0 min
40 min / 0 min	P09959	P09959	-0.130071	0.130071	0.565646	10	-0.135989	0.135989	P09959	SWI6	Regulatory protein SWI6	SWI6_YEAST	2	-8.62134	0.913787	40 min	0 min
40 min / 0 min	P0C074	P0C074	-0.146536	0.146536	0.663695	5	-0.132776	0.132776	P0C074	YSF3	RDS3 complex subunit 10	YSF3_YEAST	1	-9.65827	0.903417	40 min	0 min
40 min / 0 min	P0C0T4;Q3E792	P0C0T4;Q3E792	0.0125337	0.0125337	0.758417	45	-0.0396289	0.0396289	P0C0T4;Q3E792	RPS25B;RPS25A	40S ribosomal protein S25-B;40S ribosomal protein S25-A	RS25B_YEAST;RS25A_YEAST	6	0.872552	1.00873	40 min	0 min
40 min / 0 min	P0C0V8	P0C0V8	0.0336959	0.0336959	0.696722	49	-0.210162	0.210162	P0C0V8	RPS21A	40S ribosomal protein S21-A	RS21A_YEAST	7	2.36311	1.02363	40 min	0 min
40 min / 0 min	P0C0W1	P0C0W1	0.121983	0.121983	0.582891	70	0.145012	0.145012	P0C0W1	RPS22A	40S ribosomal protein S22-A	RS22A_YEAST	10	8.82299	1.08823	40 min	0 min
40 min / 0 min	P0C0W9;Q3E757	P0C0W9;Q3E757	0.042628	0.042628	0.596666	60	0.0741938	0.0741938	P0C0W9;Q3E757	RPL11A;RPL11B	60S ribosomal protein L11-A;60S ribosomal protein L11-B	RL11A_YEAST;RL11B_YEAST	10	2.99884	1.02999	40 min	0 min
40 min / 0 min	P0C0X0;Q3E7X9	P0C0X0;Q3E7X9	0.0717388	0.0717388	0.716782	40	0.0991195	0.0991195	P0C0X0;Q3E7X9	RPS28B;RPS28A	40S ribosomal protein S28-B;40S ribosomal protein S28-A	RS28B_YEAST;RS28A_YEAST	3	5.09826	1.05098	40 min	0 min
40 min / 0 min	P0C2H6;P0C2H7	P0C2H6;P0C2H7	0.0447528	0.0447528	0.305059	65	0.212971	0.212971	P0C2H6;P0C2H7	RPL27A;RPL27B	60S ribosomal protein L27-A;60S ribosomal protein L27-B	RL27A_YEAST;RL27B_YEAST	9	3.15064	1.03151	40 min	0 min
40 min / 0 min	P0C2H8	P0C2H8	0.0536922	0.0536922	0.563607	75	0.0958772	0.0958772	P0C2H8	RPL31A	60S ribosomal protein L31-A	RL31A_YEAST	11	3.79178	1.03792	40 min	0 min
40 min / 0 min	P0C2H9	P0C2H9	-0.0398818	0.0398818	0.551236	10	-0.561354	0.561354	P0C2H9	RPL31B	60S ribosomal protein L31-B	RL31B_YEAST	1	-2.72654	0.972735	40 min	0 min
40 min / 0 min	P0C2I6	P0C2I6	0.475069	0.475069	0.522723	5	0.427003	0.427003	P0C2I6	TY1B-LR3	Transposon Ty1-LR3 Gag-Pol polyprotein	YL13B_YEAST	1	38.9985	1.38999	40 min	0 min
40 min / 0 min	P0C5N3	P0C5N3	-0.326375	0.326375	0.625644	5	-0.426616	0.426616	P0C5N3	YGL041W-A	Uncharacterized protein YGL041W-A, mitochondrial	YG41A_YEAST	1	-20.2462	0.797538	40 min	0 min
40 min / 0 min	P0CH08;P0CH09	P0CH08;P0CH09	0.200635	0.200635	0.607382	65	-0.278088	0.278088	P0CH08;P0CH09	RPL40A;RPL40B	Ubiquitin-60S ribosomal protein L40	RL401_YEAST;RL402_YEAST	9	14.9204	1.1492	40 min	0 min
40 min / 0 min	P0CS90	P0CS90	0.0827044	0.0827044	0.720531	265	0.035135	0.035135	P0CS90	SSC1	Heat shock protein SSC1, mitochondrial	HSP77_YEAST	36	5.90013	1.059	40 min	0 min
40 min / 0 min	P0CT04	P0CT04	0.190202	0.190202	0.594615	20	0.17601	0.17601	P0CT04	PBI2	Protease B inhibitor 2	IPB2_YEAST	3	14.0924	1.14092	40 min	0 min
40 min / 0 min	P0CX12;P0CX13;P40587;P43542;P53344;P53822	P0CX12;P0CX13;P40587;P43542;P53344;P53822	-0.175811	0.175811	0.699799	10	-0.116841	0.116841	P0CX12;P0CX13;P40587;P43542;P53344;P53822	COS2;COS3;YIR043C;COS4;COS6;COS1	Protein COS2;Protein COS3;Putative uncharacterized protein YIR043C;Protein COS4;Protein COS6;Protein COS1	COS2_YEAST;COS3_YEAST;YIW3_YEAST;COS4_YEAST;COS6_YEAST;COS1_YEAST	2	-11.473	0.88527	40 min	0 min
40 min / 0 min	P0CX23;P0CX24	P0CX23;P0CX24	-0.0106827	0.0106827	0.793074	95	0.00816996	0.00816996	P0CX23;P0CX24	RPL20A;RPL20B	60S ribosomal protein L20-A;60S ribosomal protein L20-B	RL20A_YEAST;RL20B_YEAST	13	-0.737733	0.992623	40 min	0 min
40 min / 0 min	P0CX25;P0CX26	P0CX25;P0CX26	-0.0532811	0.0532811	0.594486	65	0.0762606	0.0762606	P0CX25;P0CX26	RPL43A;RPL43B	60S ribosomal protein L43-A;60S ribosomal protein L43-B	RL43A_YEAST;RL43B_YEAST	9	-3.6258	0.963742	40 min	0 min
40 min / 0 min	P0CX27;P0CX28	P0CX27;P0CX28	0.0721952	0.0721952	0.393806	25	0.189752	0.189752	P0CX27;P0CX28	RPL42A;RPL42B	60S ribosomal protein L42-A;60S ribosomal protein L42-B	RL44A_YEAST;RL44B_YEAST	5	5.13152	1.05132	40 min	0 min
40 min / 0 min	P0CX29;P0CX30	P0CX29;P0CX30	0.0845914	0.0845914	0.797761	30	0.00255414	0.00255414	P0CX29;P0CX30	RPS23A;RPS23B	40S ribosomal protein S23-A;40S ribosomal protein S23-B	RS23A_YEAST;RS23B_YEAST	6	6.03874	1.06039	40 min	0 min
40 min / 0 min	P0CX31;P0CX32	P0CX31;P0CX32	0.145358	0.145358	0.0967537	85	0.21418	0.21418	P0CX31;P0CX32	RPS24A;RPS24B	40S ribosomal protein S24-A;40S ribosomal protein S24-B	RS24A_YEAST;RS24B_YEAST	13	10.6005	1.10601	40 min	0 min
40 min / 0 min	P0CX33;P0CX34	P0CX33;P0CX34	0.0143149	0.0143149	0.75787	15	0.0202914	0.0202914	P0CX33;P0CX34	RPS30A;RPS30B	40S ribosomal protein S30-A;40S ribosomal protein S30-B	RS30A_YEAST;RS30B_YEAST	3	0.997172	1.00997	40 min	0 min
40 min / 0 min	P0CX35;P0CX36	P0CX35;P0CX36	0.136409	0.136409	0.129999	170	0.242987	0.242987	P0CX35;P0CX36	RPS4A;RPS4B	40S ribosomal protein S4-A;40S ribosomal protein S4-B	RS4A_YEAST;RS4B_YEAST	24	9.91661	1.09917	40 min	0 min
40 min / 0 min	P0CX37;P0CX38	P0CX37;P0CX38	0.0343555	0.0343555	0.494422	140	0.201485	0.201485	P0CX37;P0CX38	RPS6A;RPS6B	40S ribosomal protein S6-A;40S ribosomal protein S6-B	RS6A_YEAST;RS6B_YEAST	19	2.40992	1.0241	40 min	0 min
40 min / 0 min	P0CX39;P0CX40	P0CX39;P0CX40	-0.0325042	0.0325042	0.481106	95	-0.400362	0.400362	P0CX39;P0CX40	RPS8A;RPS8B	40S ribosomal protein S8-A;40S ribosomal protein S8-B	RS8A_YEAST;RS8B_YEAST	12	-2.22783	0.977722	40 min	0 min
40 min / 0 min	P0CX41;P0CX42	P0CX41;P0CX42	0.0557597	0.0557597	0.755493	100	-0.0174179	0.0174179	P0CX41;P0CX42	RPL23A;RPL23B	60S ribosomal protein L23-A;60S ribosomal protein L23-B	RL23A_YEAST;RL23B_YEAST	8	3.94063	1.03941	40 min	0 min
40 min / 0 min	P0CX43;P0CX44	P0CX43;P0CX44	-0.00698066	0.00698066	0.700232	130	-0.0403021	0.0403021	P0CX43;P0CX44	RPL1A;RPL1B	60S ribosomal protein L1-A;60S ribosomal protein L1-B	RL1A_YEAST;RL1B_YEAST	15	-0.482694	0.995173	40 min	0 min
40 min / 0 min	P0CX45;P0CX46	P0CX45;P0CX46	0.16405	0.16405	0.694661	115	-0.12626	0.12626	P0CX45;P0CX46	RPL2A;RPL2B	60S ribosomal protein L2-A;60S ribosomal protein L2-B	RL2A_YEAST;RL2B_YEAST	14	12.0428	1.12043	40 min	0 min
40 min / 0 min	P0CX47;P0CX48	P0CX47;P0CX48	0.0672204	0.0672204	0.524445	75	0.0983357	0.0983357	P0CX47;P0CX48	RPS11A;RPS11B	40S ribosomal protein S11-A;40S ribosomal protein S11-B	RS11A_YEAST;RS11B_YEAST	11	4.76962	1.0477	40 min	0 min
40 min / 0 min	P0CX49;P0CX50	P0CX49;P0CX50	0.0183313	0.0183313	0.780594	65	0.00857851	0.00857851	P0CX49;P0CX50	RPL18A;RPL18B	60S ribosomal protein L18-A;60S ribosomal protein L18-B	RL18A_YEAST;RL18B_YEAST	10	1.27873	1.01279	40 min	0 min
40 min / 0 min	P0CX51;P0CX52	P0CX51;P0CX52	-0.00412853	0.00412853	0.637068	90	-0.121057	0.121057	P0CX51;P0CX52	RPS16A;RPS16B	40S ribosomal protein S16-A;40S ribosomal protein S16-B	RS16A_YEAST;RS16B_YEAST	15	-0.285759	0.997142	40 min	0 min
40 min / 0 min	P0CX53;P0CX54	P0CX53;P0CX54	0.0877422	0.0877422	0.643588	70	0.110426	0.110426	P0CX53;P0CX54	RPL12A;RPL12B	60S ribosomal protein L12-A;60S ribosomal protein L12-B	RL12A_YEAST;RL12B_YEAST	10	6.27057	1.06271	40 min	0 min
40 min / 0 min	P0CX55;P0CX56	P0CX55;P0CX56	0.0512428	0.0512428	0.73258	110	0.0507831	0.0507831	P0CX55;P0CX56	RPS18A;RPS18B	40S ribosomal protein S18-A;40S ribosomal protein S18-B	RS18A_YEAST;RS18B_YEAST	15	3.61572	1.03616	40 min	0 min
40 min / 0 min	P0CX80;P0CX81	P0CX80;P0CX81	-0.302897	0.302897	0.689822	5	-0.356841	0.356841	P0CX80;P0CX81	CUP1-1;CUP1-2	Copper metallothionein 1-1;Copper metallothionein 1-2	MTCU1_YEAST;MTCU2_YEAST	1	-18.9377	0.810623	40 min	0 min
40 min / 0 min	P0CX82;P0CX83	P0CX82;P0CX83	0.00839878	0.00839878	0.574158	85	0.101973	0.101973	P0CX82;P0CX83	RPL19A;RPL19B	60S ribosomal protein L19-A;60S ribosomal protein L19-B	RL19A_YEAST;RL19B_YEAST	14	0.583857	1.00584	40 min	0 min
40 min / 0 min	P0CX84;P0CX85	P0CX84;P0CX85	-0.0243839	0.0243839	0.291065	90	0.159684	0.159684	P0CX84;P0CX85	RPL35A;RPL35B	60S ribosomal protein L35-A;60S ribosomal protein L35-B	RL35A_YEAST;RL35B_YEAST	12	-1.67596	0.98324	40 min	0 min
40 min / 0 min	P0CY11	P0CY11	0.0360053	0.0360053	0.767183	5	0.0551429	0.0551429	P0CY11	HMRA1	Silenced mating-type protein A1	HMRA1_YEAST	1	2.5271	1.02527	40 min	0 min
40 min / 0 min	P10080	P10080	0.0778893	0.0778893	0.745766	85	-0.0153526	0.0153526	P10080	SBP1	Single-stranded nucleic acid-binding protein	SSBP1_YEAST	11	5.54727	1.05547	40 min	0 min
40 min / 0 min	P10081	P10081	0.0313812	0.0313812	0.638437	210	0.0958242	0.0958242	P10081	TIF1	ATP-dependent RNA helicase eIF4A	IF4A_YEAST	27	2.19901	1.02199	40 min	0 min
40 min / 0 min	P10363	P10363	-0.0886268	0.0886268	0.800979	20	-0.000318096	0.000318096	P10363	PRI1	DNA primase small subunit	PRI1_YEAST	4	-5.95826	0.940417	40 min	0 min
40 min / 0 min	P10507	P10507	-0.0724294	0.0724294	0.556333	60	-0.179706	0.179706	P10507	MAS1	Mitochondrial-processing peptidase subunit beta	MPPB_YEAST	11	-4.89649	0.951035	40 min	0 min
40 min / 0 min	P10591	P10591	0.0309737	0.0309737	0.606967	130	0.162573	0.162573	P10591	SSA1	Heat shock protein SSA1	HSP71_YEAST	16	2.17014	1.0217	40 min	0 min
40 min / 0 min	P10592	P10592	0.0643945	0.0643945	0.434254	375	0.180601	0.180601	P10592	SSA2	Heat shock protein SSA2	HSP72_YEAST	47	4.5646	1.04565	40 min	0 min
40 min / 0 min	P10614	P10614	0.118325	0.118325	0.331942	50	0.155743	0.155743	P10614	ERG11	Lanosterol 14-alpha demethylase	CP51_YEAST	10	8.54739	1.08547	40 min	0 min
40 min / 0 min	P10622	P10622	-0.0246108	0.0246108	0.650837	10	-0.663708	0.663708	P10622	RPP1B	60S acidic ribosomal protein P1-beta	RLA3_YEAST	1	-1.69142	0.983086	40 min	0 min
40 min / 0 min	P10659	P10659	0.0635991	0.0635991	0.606313	170	0.0912545	0.0912545	P10659	SAM1	S-adenosylmethionine synthase 1	METK1_YEAST	24	4.50697	1.04507	40 min	0 min
40 min / 0 min	P10662	P10662	0.021221	0.021221	0.709281	35	-0.0211155	0.0211155	P10662	MRP1	37S ribosomal protein MRP1, mitochondrial	RT01_YEAST	7	1.4818	1.01482	40 min	0 min
40 min / 0 min	P10664	P10664	-0.0134056	0.0134056	0.664196	170	-0.0418875	0.0418875	P10664	RPL4A	60S ribosomal protein L4-A	RL4A_YEAST	23	-0.924901	0.990751	40 min	0 min
40 min / 0 min	P10823	P10823	0.127649	0.127649	0.55047	10	0.139174	0.139174	P10823	GPA2	Guanine nucleotide-binding protein alpha-2 subunit	GPA2_YEAST	2	9.25116	1.09251	40 min	0 min
40 min / 0 min	P10834	P10834	-0.248174	0.248174	0.617492	30	-0.118726	0.118726	P10834	PET54	Protein PET54	PET54_YEAST	6	-15.8038	0.841962	40 min	0 min
40 min / 0 min	P10849	P10849	-0.130197	0.130197	0.462823	15	-0.189165	0.189165	P10849	MTF2	Mitochondrial transcription factor 2	MTF2_YEAST	4	-8.62935	0.913707	40 min	0 min
40 min / 0 min	P10862	P10862	-0.140473	0.140473	0.695285	5	-0.128307	0.128307	P10862	RAD18	Postreplication repair E3 ubiquitin-protein ligase RAD18	RAD18_YEAST	1	-9.27784	0.907222	40 min	0 min
40 min / 0 min	P10869	P10869	-0.0116704	0.0116704	0.581749	125	-0.0626258	0.0626258	P10869	HOM3	Aspartokinase	AK_YEAST	20	-0.80567	0.991943	40 min	0 min
40 min / 0 min	P10962	P10962	0.0877393	0.0877393	0.462382	15	0.303061	0.303061	P10962	MAK16	Protein MAK16	MAK16_YEAST	3	6.27036	1.0627	40 min	0 min
40 min / 0 min	P10964	P10964	0.118156	0.118156	0.475954	275	0.0958861	0.0958861	P10964	RPA190	DNA-directed RNA polymerase I subunit RPA190	RPA1_YEAST	50	8.53469	1.08535	40 min	0 min
40 min / 0 min	P11075	P11075	0.153828	0.153828	0.472384	200	0.190918	0.190918	P11075	SEC7	Protein transport protein SEC7	SEC7_YEAST	38	11.2517	1.11252	40 min	0 min
40 min / 0 min	P11076	P11076	-0.0483534	0.0483534	0.73819	15	0.0497044	0.0497044	P11076	ARF1	ADP-ribosylation factor 1	ARF1_YEAST	3	-3.29606	0.967039	40 min	0 min
40 min / 0 min	P11154	P11154	0.0604513	0.0604513	0.324134	90	0.346038	0.346038	P11154	PYC1	Pyruvate carboxylase 1	PYC1_YEAST	12	4.27919	1.04279	40 min	0 min
40 min / 0 min	P11353	P11353	-0.0453318	0.0453318	0.760527	50	0.0142763	0.0142763	P11353	HEM13	Oxygen-dependent coproporphyrinogen-III oxidase	HEM6_YEAST	10	-3.09331	0.969067	40 min	0 min
40 min / 0 min	P11412	P11412	-0.0313577	0.0313577	0.623317	140	0.0484653	0.0484653	P11412	ZWF1	Glucose-6-phosphate 1-dehydrogenase	G6PD_YEAST	22	-2.1501	0.978499	40 min	0 min
40 min / 0 min	P11433	P11433	-0.0083605	0.0083605	0.748631	25	-0.047833	0.047833	P11433	CDC24	Cell division control protein 24	CDC24_YEAST	5	-0.57783	0.994222	40 min	0 min
40 min / 0 min	P11484	P11484	0.106053	0.106053	0.670966	285	0.061193	0.061193	P11484	SSB1	Heat shock protein SSB1	HSP75_YEAST	40	7.62798	1.07628	40 min	0 min
40 min / 0 min	P11491	P11491	-0.0319305	0.0319305	0.7331	65	-0.0626951	0.0626951	P11491	PHO8	Repressible alkaline phosphatase	PPB_YEAST	11	-2.18894	0.978111	40 min	0 min
40 min / 0 min	P11632	P11632	-0.08752	0.08752	0.690106	45	0.155432	0.155432	P11632	NHP6A	Non-histone chromosomal protein 6A	NHP6A_YEAST	6	-5.88608	0.941139	40 min	0 min
40 min / 0 min	P11633	P11633	0.0152351	0.0152351	0.625571	30	0.143354	0.143354	P11633	NHP6B	Non-histone chromosomal protein 6B	NHP6B_YEAST	4	1.06161	1.01062	40 min	0 min
40 min / 0 min	P11655	P11655	0.0481758	0.0481758	0.645176	25	0.0625487	0.0625487	P11655	SEC12	Guanine nucleotide-exchange factor SEC12	SEC12_YEAST	5	3.39567	1.03396	40 min	0 min
40 min / 0 min	P11709	P11709	0.198569	0.198569	0.741082	10	0.138123	0.138123	P11709	BIK1	Nuclear fusion protein BIK1	BIK1_YEAST	2	14.7559	1.14756	40 min	0 min
40 min / 0 min	P11745	P11745	-0.0147787	0.0147787	0.644608	130	0.0433373	0.0433373	P11745	RNA1	Ran GTPase-activating protein 1	RNA1_YEAST	22	-1.01915	0.989808	40 min	0 min
40 min / 0 min	P11746	P11746	0.156743	0.156743	0.554298	5	0.15132	0.15132	P11746	MCM1	Pheromone receptor transcription factor	MCM1_YEAST	1	11.4768	1.11477	40 min	0 min
40 min / 0 min	P11792	P11792	0.0423464	0.0423464	0.519654	40	0.293209	0.293209	P11792	SCH9	Serine/threonine-protein kinase SCH9	SCH9_YEAST	8	2.97873	1.02979	40 min	0 min
40 min / 0 min	P11914	P11914	-0.0126073	0.0126073	0.784036	105	-0.00832449	0.00832449	P11914	MAS2	Mitochondrial-processing peptidase subunit alpha	MPPA_YEAST	16	-0.870066	0.991299	40 min	0 min
40 min / 0 min	P11938	P11938	-0.0209239	0.0209239	0.792688	70	0.00318968	0.00318968	P11938	RAP1	DNA-binding protein RAP1	RAP1_YEAST	12	-1.43987	0.985601	40 min	0 min
40 min / 0 min	P11972	P11972	-0.104104	0.104104	0.408584	55	-0.223779	0.223779	P11972	SST2	Protein SST2	SST2_YEAST	11	-6.96176	0.930382	40 min	0 min
40 min / 0 min	P11978	P11978	0.10428	0.10428	0.623035	20	0.135903	0.135903	P11978	SIR4	Regulatory protein SIR4	SIR4_YEAST	4	7.49577	1.07496	40 min	0 min
40 min / 0 min	P11986	P11986	0.485297	0.485297	0.532683	15	0.531586	0.531586	P11986	INO1	Inositol-3-phosphate synthase	INO1_YEAST	3	39.9874	1.39987	40 min	0 min
40 min / 0 min	P12383	P12383	0.00678121	0.00678121	0.716473	30	-0.148031	0.148031	P12383	PDR1	Transcription factor PDR1	PDR1_YEAST	5	0.471144	1.00471	40 min	0 min
40 min / 0 min	P12385	P12385	0.0258365	0.0258365	0.673813	155	0.0317966	0.0317966	P12385	SUP45	Eukaryotic peptide chain release factor subunit 1	ERF1_YEAST	27	1.80698	1.01807	40 min	0 min
40 min / 0 min	P12611	P12611	-0.00479846	0.00479846	0.648392	40	0.0573169	0.0573169	P12611	WHI2	Growth regulation protein	WHI2_YEAST	7	-0.332052	0.996679	40 min	0 min
40 min / 0 min	P12612	P12612	-0.0300904	0.0300904	0.771795	110	0.0124943	0.0124943	P12612	TCP1	T-complex protein 1 subunit alpha	TCPA_YEAST	21	-2.06411	0.979359	40 min	0 min
40 min / 0 min	P12630	P12630	0.0210402	0.0210402	0.587122	40	0.143418	0.143418	P12630	BAR1	Barrierpepsin	BAR1_YEAST	6	1.46908	1.01469	40 min	0 min
40 min / 0 min	P12683	P12683	0.00993087	0.00993087	0.595535	50	-0.126638	0.126638	P12683	HMG1	3-hydroxy-3-methylglutaryl-coenzyme A reductase 1	HMDH1_YEAST	10	0.69073	1.00691	40 min	0 min
40 min / 0 min	P12684	P12684	-0.0122844	0.0122844	0.589329	55	-0.15202	0.15202	P12684	HMG2	3-hydroxy-3-methylglutaryl-coenzyme A reductase 2	HMDH2_YEAST	11	-0.847875	0.991521	40 min	0 min
40 min / 0 min	P12686	P12686	-0.154225	0.154225	0.585673	10	-0.154142	0.154142	P12686	MRP13	37S ribosomal protein MRP13, mitochondrial	RT13_YEAST	2	-10.1385	0.898615	40 min	0 min
40 min / 0 min	P12687	P12687	0.0879467	0.0879467	0.670168	40	0.167821	0.167821	P12687	MRP7	54S ribosomal protein L2, mitochondrial	RM02_YEAST	8	6.28564	1.06286	40 min	0 min
40 min / 0 min	P12688	P12688	0.0391796	0.0391796	0.763391	95	-0.0186413	0.0186413	P12688	YPK1	Serine/threonine-protein kinase YPK1	YPK1_YEAST	16	2.75294	1.02753	40 min	0 min
40 min / 0 min	P12695	P12695	0.0334991	0.0334991	0.617492	85	0.0644957	0.0644957	P12695	LAT1	Dihydrolipoyllysine-residue acetyltransferase component of pyruvate dehydrogenase complex, mitochondrial	ODP2_YEAST	13	2.34915	1.02349	40 min	0 min
40 min / 0 min	P12709	P12709	0.0572081	0.0572081	0.473526	210	0.0944987	0.0944987	P12709	PGI1	Glucose-6-phosphate isomerase	G6PI_YEAST	25	4.04503	1.04045	40 min	0 min
40 min / 0 min	P12753	P12753	-0.177052	0.177052	0.441486	40	-0.345491	0.345491	P12753	RAD50	DNA repair protein RAD50	RAD50_YEAST	8	-11.5491	0.884509	40 min	0 min
40 min / 0 min	P12754	P12754	0.121476	0.121476	0.788742	40	0.0134275	0.0134275	P12754	GCD2	Translation initiation factor eIF-2B subunit delta	EI2BD_YEAST	7	8.78476	1.08785	40 min	0 min
40 min / 0 min	P12866	P12866	0.0106621	0.0106621	0.783759	5	0.0127629	0.0127629	P12866	STE6	Alpha-factor-transporting ATPase	STE6_YEAST	1	0.741778	1.00742	40 min	0 min
40 min / 0 min	P12868	P12868	-0.259031	0.259031	0.524684	20	-0.596587	0.596587	P12868	PEP5	E3 ubiquitin-protein ligase PEP5	PEP5_YEAST	4	-16.4351	0.835649	40 min	0 min
40 min / 0 min	P12887	P12887	0.0897247	0.0897247	0.756495	15	0.051234	0.051234	P12887	UNG1	Uracil-DNA glycosylase	UNG_YEAST	3	6.41671	1.06417	40 min	0 min
40 min / 0 min	P12904	P12904	-0.123735	0.123735	0.769438	55	0.0232264	0.0232264	P12904	SNF4	5'-AMP-activated protein kinase subunit gamma	AAKG_YEAST	10	-8.21917	0.917808	40 min	0 min
40 min / 0 min	P12945	P12945	-0.04309	0.04309	0.754841	200	-0.0245702	0.0245702	P12945	NAT1	N-terminal acetyltransferase A complex subunit NAT1	NAT1_YEAST	32	-2.94261	0.970574	40 min	0 min
40 min / 0 min	P12954	P12954	0.133453	0.133453	0.72211	5	0.122243	0.122243	P12954	SRS2	ATP-dependent DNA helicase SRS2	SRS2_YEAST	1	9.69156	1.09692	40 min	0 min
40 min / 0 min	P12962	P12962	-0.129969	0.129969	0.529431	15	-0.460229	0.460229	P12962	CAF20	Cap-associated protein CAF20	CAF20_YEAST	3	-8.61486	0.913851	40 min	0 min
40 min / 0 min	P13099	P13099	0.350526	0.350526	0.523114	5	0.35321	0.35321	P13099	TOP3	DNA topoisomerase 3	TOP3_YEAST	1	27.5026	1.27503	40 min	0 min
40 min / 0 min	P13185	P13185	-0.121805	0.121805	0.792625	25	-0.00853813	0.00853813	P13185	KIN1	Serine/threonine protein kinase KIN1	KIN1_YEAST	5	-8.09629	0.919037	40 min	0 min
40 min / 0 min	P13186	P13186	0.116974	0.116974	0.677033	30	0.109329	0.109329	P13186	KIN2	Serine/threonine-protein kinase KIN2	KIN2_YEAST	5	8.44577	1.08446	40 min	0 min
40 min / 0 min	P13188	P13188	0.0666813	0.0666813	0.381485	300	0.134195	0.134195	P13188	GLN4	Glutamine--tRNA ligase	SYQ_YEAST	47	4.73048	1.0473	40 min	0 min
40 min / 0 min	P13259	P13259	0.0627475	0.0627475	0.529083	50	0.089769	0.089769	P13259	PCT1	Choline-phosphate cytidylyltransferase	PCY1_YEAST	10	4.4453	1.04445	40 min	0 min
40 min / 0 min	P13298	P13298	-0.047512	0.047512	0.6968	70	0.0683094	0.0683094	P13298	URA5	Orotate phosphoribosyltransferase 1	PYRE_YEAST	12	-3.23964	0.967604	40 min	0 min
40 min / 0 min	P13382	P13382	0.029997	0.029997	0.611772	60	0.0580238	0.0580238	P13382	POL1	DNA polymerase alpha catalytic subunit A	DPOA_YEAST	12	2.101	1.02101	40 min	0 min
40 min / 0 min	P13393	P13393	0.0945297	0.0945297	0.50317	25	0.15923	0.15923	P13393	SPT15	TATA-box-binding protein	TBP_YEAST	5	6.77173	1.06772	40 min	0 min
40 min / 0 min	P13434	P13434	-0.0296452	0.0296452	0.731999	5	-0.0363388	0.0363388	P13434	HAP3	Transcriptional activator HAP3	HAP3_YEAST	1	-2.03388	0.979661	40 min	0 min
40 min / 0 min	P13483	P13483	0.109687	0.109687	0.620659	5	0.126024	0.126024	P13483	DAT1	Oligo(A)/oligo(T)-binding protein	DATI_YEAST	1	7.89938	1.07899	40 min	0 min
40 min / 0 min	P13517	P13517	-0.161474	0.161474	0.477485	45	-0.127396	0.127396	P13517	CAP2	F-actin-capping protein subunit beta	CAPZB_YEAST	9	-10.5889	0.894111	40 min	0 min
40 min / 0 min	P13574	P13574	0.0830192	0.0830192	0.551309	5	0.0788426	0.0788426	P13574	STE12	Protein STE12	STE12_YEAST	1	5.92324	1.05923	40 min	0 min
40 min / 0 min	P13586	P13586	0.0592683	0.0592683	0.640509	105	-0.146857	0.146857	P13586	PMR1	Calcium-transporting ATPase 1	ATC1_YEAST	18	4.19372	1.04194	40 min	0 min
40 min / 0 min	P13587;Q01896;Q12691	P13587;Q01896;Q12691	-0.109828	0.109828	0.631657	65	-0.12063	0.12063	P13587;Q01896;Q12691	ENA1;ENA2;ENA5	Sodium transport ATPase 1;Sodium transport ATPase 2;Sodium transport ATPase 5	ATN1_YEAST;ATN2_YEAST;ATN5_YEAST	13	-7.33013	0.926699	40 min	0 min
40 min / 0 min	P13663	P13663	-0.0576029	0.0576029	0.418342	170	0.245315	0.245315	P13663	HOM2	Aspartate-semialdehyde dehydrogenase	DHAS_YEAST	23	-3.91407	0.960859	40 min	0 min
40 min / 0 min	P13712	P13712	-0.079393	0.079393	0.610737	15	-0.317949	0.317949	P13712	MSI1	Chromatin assembly factor 1 subunit p50	MSI1_YEAST	3	-5.35442	0.946456	40 min	0 min
40 min / 0 min	P13856	P13856	0.0203057	0.0203057	0.764033	20	0.0141155	0.0141155	P13856	RSR1	Ras-related protein RSR1	RSR1_YEAST	4	1.41744	1.01417	40 min	0 min
40 min / 0 min	P14020	P14020	0.0673464	0.0673464	0.796432	140	-0.00435676	0.00435676	P14020	DPM1	Dolichol-phosphate mannosyltransferase	DPM1_YEAST	15	4.77877	1.04779	40 min	0 min
40 min / 0 min	P14063	P14063	-0.0404904	0.0404904	0.674441	5	-0.033389	0.033389	P14063	MRPL31	54S ribosomal protein L31, mitochondrial	RM31_YEAST	1	-2.76756	0.972324	40 min	0 min
40 min / 0 min	P14065	P14065	0.0422034	0.0422034	0.585012	55	-0.086186	0.086186	P14065	GCY1	Glycerol 2-dehydrogenase (NADP(+))	GCY1_YEAST	10	2.96852	1.02969	40 min	0 min
40 min / 0 min	P14120	P14120	-0.167027	0.167027	0.62738	65	0.308301	0.308301	P14120	RPL30	60S ribosomal protein L30	RL30_YEAST	8	-10.9324	0.890676	40 min	0 min
40 min / 0 min	P14126	P14126	0.180113	0.180113	0.582619	255	0.0613559	0.0613559	P14126	RPL3	60S ribosomal protein L3	RL3_YEAST	29	13.2973	1.13297	40 min	0 min
40 min / 0 min	P14164	P14164	0.0311309	0.0311309	0.585012	60	0.217223	0.217223	P14164	ABF1	ARS-binding factor 1	ABF1_YEAST	11	2.18128	1.02181	40 min	0 min
40 min / 0 min	P14180	P14180	-0.00882802	0.00882802	0.776337	10	-0.0180534	0.0180534	P14180	CHS2	Chitin synthase 2	CHS2_YEAST	2	-0.610043	0.9939	40 min	0 min
40 min / 0 min	P14306	P14306	-0.12074	0.12074	0.545195	20	-0.126624	0.126624	P14306	TFS1	Carboxypeptidase Y inhibitor	CPYI_YEAST	4	-8.02843	0.919716	40 min	0 min
40 min / 0 min	P14540	P14540	0.154904	0.154904	0.604903	240	0.0863934	0.0863934	P14540	FBA1	Fructose-bisphosphate aldolase	ALF_YEAST	28	11.3347	1.11335	40 min	0 min
40 min / 0 min	P14680	P14680	0.531407	0.531407	0.737285	30	0.0981802	0.0981802	P14680	YAK1	Dual specificity protein kinase YAK1	YAK1_YEAST	6	44.5338	1.44534	40 min	0 min
40 min / 0 min	P14682	P14682	0.239405	0.239405	0.61306	35	-0.386219	0.386219	P14682	CDC34	Ubiquitin-conjugating enzyme E2-34 kDa	UBC3_YEAST	4	18.0506	1.18051	40 min	0 min
40 min / 0 min	P14693	P14693	-0.195317	0.195317	0.684995	20	-0.158785	0.158785	P14693	SAM35	Sorting assembly machinery 35 kDa subunit	SAM35_YEAST	4	-12.6619	0.873381	40 min	0 min
40 min / 0 min	P14736	P14736	-0.0571063	0.0571063	0.715879	10	-0.201034	0.201034	P14736	RAD4	DNA repair protein RAD4	RAD4_YEAST	2	-3.88099	0.96119	40 min	0 min
40 min / 0 min	P14741	P14741	-0.0657951	0.0657951	0.703813	40	0.0897837	0.0897837	P14741	GCN3	Translation initiation factor eIF-2B subunit alpha	EI2BA_YEAST	7	-4.45813	0.955419	40 min	0 min
40 min / 0 min	P14742	P14742	0.0357736	0.0357736	0.459569	170	0.182959	0.182959	P14742	GFA1	Glutamine--fructose-6-phosphate aminotransferase [isomerizing]	GFA1_YEAST	27	2.51063	1.02511	40 min	0 min
40 min / 0 min	P14743	P14743	-0.0967759	0.0967759	0.45557	45	-0.387679	0.387679	P14743	NMT1	Glycylpeptide N-tetradecanoyltransferase	NMT_YEAST	10	-6.48795	0.93512	40 min	0 min
40 min / 0 min	P14747	P14747	-0.0413545	0.0413545	0.631214	40	-0.0632703	0.0632703	P14747	CMP2	Serine/threonine-protein phosphatase 2B catalytic subunit A2	PP2B2_YEAST	8	-2.82578	0.971742	40 min	0 min
40 min / 0 min	P14772	P14772	-0.102987	0.102987	0.65541	45	-0.161567	0.161567	P14772	BPT1	Bile pigment transporter 1	BPT1_YEAST	9	-6.88971	0.931103	40 min	0 min
40 min / 0 min	P14832	P14832	0.120129	0.120129	0.209417	85	0.232057	0.232057	P14832	CPR1	Peptidyl-prolyl cis-trans isomerase	CYPH_YEAST	11	8.68319	1.08683	40 min	0 min
40 min / 0 min	P14843	P14843	-0.0158084	0.0158084	0.726338	125	-0.058308	0.058308	P14843	ARO3	Phospho-2-dehydro-3-deoxyheptonate aldolase, phenylalanine-inhibited	AROF_YEAST	16	-1.08977	0.989102	40 min	0 min
40 min / 0 min	P14904	P14904	-0.105527	0.105527	0.462382	70	-0.103031	0.103031	P14904	APE1	Vacuolar aminopeptidase 1	AMPL_YEAST	13	-7.05347	0.929465	40 min	0 min
40 min / 0 min	P14906	P14906	0.123576	0.123576	0.331942	135	0.264577	0.264577	P14906	SEC63	Protein translocation protein SEC63	SEC63_YEAST	23	8.9432	1.08943	40 min	0 min
40 min / 0 min	P14907	P14907	0.0390106	0.0390106	0.393806	155	0.188283	0.188283	P14907	NSP1	Nucleoporin NSP1	NSP1_YEAST	23	2.7409	1.02741	40 min	0 min
40 min / 0 min	P14908	P14908	0.1007	0.1007	0.797626	10	0.00875374	0.00875374	P14908	MTF1	Mitochondrial transcription factor 1	MTF1_YEAST	2	7.22938	1.07229	40 min	0 min
40 min / 0 min	P14922	P14922	0.136403	0.136403	0.643588	95	0.0968879	0.0968879	P14922	CYC8	General transcriptional corepressor CYC8	CYC8_YEAST	17	9.91611	1.09916	40 min	0 min
40 min / 0 min	P15019	P15019	0.0994632	0.0994632	0.769149	175	0.0124498	0.0124498	P15019	TAL1	Transaldolase	TAL1_YEAST	25	7.13748	1.07137	40 min	0 min
40 min / 0 min	P15108	P15108	0.13259	0.13259	0.550572	360	0.149067	0.149067	P15108	HSC82	ATP-dependent molecular chaperone HSC82	HSC82_YEAST	49	9.62603	1.09626	40 min	0 min
40 min / 0 min	P15179	P15179	0.0303542	0.0303542	0.664995	10	0.288522	0.288522	P15179	MSD1	Aspartate--tRNA ligase, mitochondrial	SYDM_YEAST	2	2.12628	1.02126	40 min	0 min
40 min / 0 min	P15180	P15180	0.0642301	0.0642301	0.392282	320	-0.0966589	0.0966589	P15180	KRS1	Lysine--tRNA ligase, cytoplasmic	SYKC_YEAST	40	4.55269	1.04553	40 min	0 min
40 min / 0 min	P15274	P15274	-0.0563931	0.0563931	0.424549	75	-0.177708	0.177708	P15274	AMD1	AMP deaminase	AMPD_YEAST	16	-3.83346	0.961665	40 min	0 min
40 min / 0 min	P15303	P15303	0.0225293	0.0225293	0.74377	140	0.0164049	0.0164049	P15303	SEC23	Protein transport protein SEC23	SEC23_YEAST	22	1.57387	1.01574	40 min	0 min
40 min / 0 min	P15367	P15367	0.00927407	0.00927407	0.643754	25	-0.106609	0.106609	P15367	SEC11	Signal peptidase complex catalytic subunit SEC11	SEC11_YEAST	4	0.6449	1.00645	40 min	0 min
40 min / 0 min	P15424	P15424	0.158987	0.158987	0.471494	95	0.190893	0.190893	P15424	MSS116	ATP-dependent RNA helicase MSS116, mitochondrial	MS116_YEAST	18	11.6503	1.1165	40 min	0 min
40 min / 0 min	P15436	P15436	-0.0454787	0.0454787	0.510277	45	0.238142	0.238142	P15436	POL3	DNA polymerase delta catalytic subunit	DPOD_YEAST	8	-3.10317	0.968968	40 min	0 min
40 min / 0 min	P15442	P15442	-0.283621	0.283621	0.598318	20	-0.34417	0.34417	P15442	GCN2	Serine/threonine-protein kinase GCN2	GCN2_YEAST	4	-17.8474	0.821526	40 min	0 min
40 min / 0 min	P15454	P15454	0.0771376	0.0771376	0.619049	105	-0.0843396	0.0843396	P15454	GUK1	Guanylate kinase	KGUA_YEAST	15	5.4923	1.05492	40 min	0 min
40 min / 0 min	P15496	P15496	-0.145788	0.145788	0.737034	60	-0.0866682	0.0866682	P15496	IDI1	Isopentenyl-diphosphate Delta-isomerase	IDI1_YEAST	9	-9.61146	0.903885	40 min	0 min
40 min / 0 min	P15565	P15565	0.115601	0.115601	0.377892	120	0.152097	0.152097	P15565	TRM1	tRNA (guanine(26)-N(2))-dimethyltransferase, mitochondrial	TRM1_YEAST	20	8.34264	1.08343	40 min	0 min
40 min / 0 min	P15624	P15624	0.150198	0.150198	0.582073	200	0.133002	0.133002	P15624	FRS1	Phenylalanine--tRNA ligase beta subunit	SYFB_YEAST	32	10.9722	1.10972	40 min	0 min
40 min / 0 min	P15625	P15625	-0.00356075	0.00356075	0.656538	190	0.0524541	0.0524541	P15625	FRS2	Phenylalanine--tRNA ligase alpha subunit	SYFA_YEAST	24	-0.246508	0.997535	40 min	0 min
40 min / 0 min	P15646	P15646	0.127112	0.127112	0.55967	150	0.154597	0.154597	P15646	NOP1	rRNA 2'-O-methyltransferase fibrillarin	FBRL_YEAST	18	9.21052	1.09211	40 min	0 min
40 min / 0 min	P15700	P15700	0.0681967	0.0681967	0.624056	65	-0.101894	0.101894	P15700	URA6	Uridylate kinase	KCY_YEAST	10	4.84054	1.04841	40 min	0 min
40 min / 0 min	P15703	P15703	-0.0301094	0.0301094	0.689667	65	0.0305636	0.0305636	P15703	BGL2	Glucan 1,3-beta-glucosidase	BGL2_YEAST	9	-2.0654	0.979346	40 min	0 min
40 min / 0 min	P15705	P15705	-0.0730006	0.0730006	0.651984	225	-0.0615299	0.0615299	P15705	STI1	Heat shock protein STI1	STI1_YEAST	36	-4.93413	0.950659	40 min	0 min
40 min / 0 min	P15731	P15731	-0.0768192	0.0768192	0.64698	20	-0.0538712	0.0538712	P15731	UBC4	Ubiquitin-conjugating enzyme E2 4	UBC4_YEAST	4	-5.18542	0.948146	40 min	0 min
40 min / 0 min	P15790	P15790	-0.183852	0.183852	0.401609	30	-0.255739	0.255739	P15790	CKA1	Casein kinase II subunit alpha	CSK21_YEAST	6	-11.9651	0.880349	40 min	0 min
40 min / 0 min	P15801	P15801	-0.0230931	0.0230931	0.692242	10	-0.141681	0.141681	P15801	MIP1	DNA polymerase gamma	DPOG_YEAST	2	-1.58795	0.984121	40 min	0 min
40 min / 0 min	P15873	P15873	-0.0798384	0.0798384	0.651139	90	0.180576	0.180576	P15873	POL30	Proliferating cell nuclear antigen	PCNA_YEAST	13	-5.38364	0.946164	40 min	0 min
40 min / 0 min	P15891	P15891	0.0443484	0.0443484	0.65387	150	-0.0668303	0.0668303	P15891	ABP1	Actin-binding protein	ABP1_YEAST	26	3.12173	1.03122	40 min	0 min
40 min / 0 min	P15992	P15992	-0.135993	0.135993	0.548078	25	-0.117439	0.117439	P15992	HSP26	Heat shock protein 26	HSP26_YEAST	5	-8.99568	0.910043	40 min	0 min
40 min / 0 min	P16120	P16120	-0.0719331	0.0719331	0.532433	235	-0.0564586	0.0564586	P16120	THR4	Threonine synthase	THRC_YEAST	34	-4.86376	0.951362	40 min	0 min
40 min / 0 min	P16140	P16140	0.0837443	0.0837443	0.585673	265	0.106668	0.106668	P16140	VMA2	V-type proton ATPase subunit B	VATB_YEAST	34	5.9765	1.05976	40 min	0 min
40 min / 0 min	P16370	P16370	-0.163152	0.163152	0.753482	30	0.0368036	0.0368036	P16370	RPB3	DNA-directed RNA polymerase II subunit RPB3	RPB3_YEAST	5	-10.6928	0.893072	40 min	0 min
40 min / 0 min	P16387	P16387	0.0910975	0.0910975	0.586939	210	0.10998	0.10998	P16387	PDA1	Pyruvate dehydrogenase E1 component subunit alpha, mitochondrial	ODPA_YEAST	28	6.51802	1.06518	40 min	0 min
40 min / 0 min	P16451	P16451	0.0189055	0.0189055	0.735191	95	-0.0440216	0.0440216	P16451	PDX1	Pyruvate dehydrogenase complex protein X component, mitochondrial	ODPX_YEAST	12	1.31905	1.01319	40 min	0 min
40 min / 0 min	P16467	P16467	-0.10864	0.10864	0.741809	15	-0.0472004	0.0472004	P16467	PDC5	Pyruvate decarboxylase isozyme 2	PDC5_YEAST	3	-7.25383	0.927462	40 min	0 min
40 min / 0 min	P16474	P16474	0.00748468	0.00748468	0.671191	239	-0.0481251	0.0481251	P16474	KAR2	78 kDa glucose-regulated protein homolog	GRP78_YEAST	36	0.520146	1.0052	40 min	0 min
40 min / 0 min	P16521	P16521	0.136585	0.136585	0.0287663	600	0.231016	0.231016	P16521	YEF3	Elongation factor 3A	EF3A_YEAST	63	9.92997	1.0993	40 min	0 min
40 min / 0 min	P16522	P16522	-0.775781	0.775781	0.524445	5	-0.7718	0.7718	P16522	CDC23	Anaphase-promoting complex subunit CDC23	CDC23_YEAST	1	-41.5928	0.584072	40 min	0 min
40 min / 0 min	P16547	P16547	-0.0120736	0.0120736	0.422974	45	-0.298181	0.298181	P16547	OM45	Mitochondrial outer membrane protein OM45	OM45_YEAST	9	-0.833389	0.991666	40 min	0 min
40 min / 0 min	P16550	P16550	0.106323	0.106323	0.658507	125	0.03837	0.03837	P16550	APA1	Protein APA1	APA1_YEAST	16	7.64812	1.07648	40 min	0 min
40 min / 0 min	P16603	P16603	0.149671	0.149671	0.78291	130	0.0104316	0.0104316	P16603	NCP1	NADPH--cytochrome P450 reductase	NCPR_YEAST	22	10.9317	1.10932	40 min	0 min
40 min / 0 min	P16622	P16622	-0.0751107	0.0751107	0.576649	75	0.289852	0.289852	P16622	HEM15	Ferrochelatase, mitochondrial	HEMH_YEAST	13	-5.07307	0.949269	40 min	0 min
40 min / 0 min	P16639	P16639	-0.0130949	0.0130949	0.734117	20	-0.0829514	0.0829514	P16639	ATE1	Arginyl-tRNA--protein transferase 1	ATE1_YEAST	4	-0.903561	0.990964	40 min	0 min
40 min / 0 min	P16649	P16649	0.142643	0.142643	0.325531	140	0.137184	0.137184	P16649	TUP1	General transcriptional corepressor TUP1	TUP1_YEAST	23	10.3926	1.10393	40 min	0 min
40 min / 0 min	P16661	P16661	-0.4309	0.4309	0.448211	5	-0.421365	0.421365	P16661	ALG1	Chitobiosyldiphosphodolichol beta-mannosyltransferase	ALG1_YEAST	1	-25.8201	0.741799	40 min	0 min
40 min / 0 min	P16664	P16664	-0.00311655	0.00311655	0.790742	5	0.00947997	0.00947997	P16664	RGP1	Guanine nucleotide exchange factor subunit RGP1	RGP1_YEAST	1	-0.21579	0.997842	40 min	0 min
40 min / 0 min	P16861	P16861	0.0961597	0.0961597	0.202162	340	0.102064	0.102064	P16861	PFK1	ATP-dependent 6-phosphofructokinase subunit alpha	PFKA1_YEAST	47	6.89243	1.06892	40 min	0 min
40 min / 0 min	P16862	P16862	0.0269814	0.0269814	0.734012	285	0.013868	0.013868	P16862	PFK2	ATP-dependent 6-phosphofructokinase subunit beta	PFKA2_YEAST	40	1.8878	1.01888	40 min	0 min
40 min / 0 min	P16892	P16892	0.0235997	0.0235997	0.789764	20	0.0157155	0.0157155	P16892	FUS3	Mitogen-activated protein kinase FUS3	FUS3_YEAST	4	1.64926	1.01649	40 min	0 min
40 min / 0 min	P16965	P16965	-0.0937182	0.0937182	0.55047	10	0.441239	0.441239	P16965	STF2	ATPase-stabilizing factor 15 kDa protein	STF2_YEAST	2	-6.28955	0.937104	40 min	0 min
40 min / 0 min	P17064	P17064	-0.144373	0.144373	0.60789	50	-0.340224	0.340224	P17064	FCY2	Purine-cytosine permease FCY2	FCY2_YEAST	8	-9.52277	0.904772	40 min	0 min
40 min / 0 min	P17065	P17065	-0.0113598	0.0113598	0.651429	15	-0.185313	0.185313	P17065	SEC2	Rab guanine nucleotide exchange factor SEC2	SEC2_YEAST	3	-0.784307	0.992157	40 min	0 min
40 min / 0 min	P17076	P17076	-0.0417132	0.0417132	0.613658	45	0.272046	0.272046	P17076	RPL8A	60S ribosomal protein L8-A	RL8A_YEAST	4	-2.84994	0.971501	40 min	0 min
40 min / 0 min	P17106	P17106	-0.208156	0.208156	0.756433	55	-0.023007	0.023007	P17106	CBF1	Centromere-binding protein 1	CBF1_YEAST	10	-13.4357	0.865643	40 min	0 min
40 min / 0 min	P17121	P17121	-0.277128	0.277128	0.600528	5	-0.428729	0.428729	P17121	SAC7	GTPase-activating protein SAC7	SAC7_YEAST	1	-17.4768	0.825232	40 min	0 min
40 min / 0 min	P17255	P17255	0.0977465	0.0977465	0.284472	480	0.10208	0.10208	P17255	VMA1	V-type proton ATPase catalytic subunit A	VATA_YEAST	68	7.01007	1.0701	40 min	0 min
40 min / 0 min	P17423	P17423	-0.0547307	0.0547307	0.552805	105	-0.158959	0.158959	P17423	THR1	Homoserine kinase	KHSE_YEAST	14	-3.72259	0.962774	40 min	0 min
40 min / 0 min	P17442	P17442	0.062404	0.062404	0.707927	40	-0.0916689	0.0916689	P17442	PHO81	Phosphate system positive regulatory protein PHO81	PHO81_YEAST	8	4.42043	1.0442	40 min	0 min
40 min / 0 min	P17505	P17505	0.106239	0.106239	0.646312	125	0.101454	0.101454	P17505	MDH1	Malate dehydrogenase, mitochondrial	MDHM_YEAST	18	7.64188	1.07642	40 min	0 min
40 min / 0 min	P17536	P17536	-0.183651	0.183651	0.647128	155	0.0582743	0.0582743	P17536	TPM1	Tropomyosin-1	TPM1_YEAST	24	-11.9528	0.880472	40 min	0 min
40 min / 0 min	P17555	P17555	-0.0728308	0.0728308	0.589691	105	-0.119369	0.119369	P17555	SRV2	Adenylyl cyclase-associated protein	CAP_YEAST	16	-4.92294	0.950771	40 min	0 min
40 min / 0 min	P17558	P17558	0.105592	0.105592	0.675051	25	0.0362886	0.0362886	P17558	PET123	37S ribosomal protein PET123, mitochondrial	RTPT_YEAST	5	7.59359	1.07594	40 min	0 min
40 min / 0 min	P17629	P17629	-0.102876	0.102876	0.511142	25	-0.344325	0.344325	P17629	HPR1	THO complex subunit HPR1	HPR1_YEAST	5	-6.88253	0.931175	40 min	0 min
40 min / 0 min	P17649	P17649	-0.176904	0.176904	0.799837	120	0.00104447	0.00104447	P17649	UGA1	4-aminobutyrate aminotransferase	GABAT_YEAST	20	-11.5401	0.884599	40 min	0 min
40 min / 0 min	P17695	P17695	-0.0872301	0.0872301	0.591229	50	0.44465	0.44465	P17695	GRX2	Glutaredoxin-2, mitochondrial	GLRX2_YEAST	7	-5.86717	0.941328	40 min	0 min
40 min / 0 min	P17709	P17709	-0.0300976	0.0300976	0.786331	125	0.00462602	0.00462602	P17709	GLK1	Glucokinase-1	HXKG_YEAST	19	-2.06459	0.979354	40 min	0 min
40 min / 0 min	P17883	P17883	-0.0754979	0.0754979	0.55047	105	-0.0837245	0.0837245	P17883	SKI3	Superkiller protein 3	SKI3_YEAST	21	-5.09854	0.949015	40 min	0 min
40 min / 0 min	P17891	P17891	-0.143168	0.143168	0.792478	75	0.0133759	0.0133759	P17891	CLC1	Clathrin light chain	CLC1_YEAST	13	-9.44715	0.905529	40 min	0 min
40 min / 0 min	P17898	P17898	0.0600079	0.0600079	0.719716	5	0.0654825	0.0654825	P17898	CPT1	Cholinephosphotransferase 1	CPT1_YEAST	1	4.24715	1.04247	40 min	0 min
40 min / 0 min	P17967	P17967	0.0675396	0.0675396	0.801039	210	3.86236e-05	3.86236e-05	P17967	PDI1	Protein disulfide-isomerase	PDI_YEAST	28	4.7928	1.04793	40 min	0 min
40 min / 0 min	P18238	P18238	0.022983	0.022983	0.779126	5	0.0338972	0.0338972	P18238	AAC3	ADP,ATP carrier protein 3	ADT3_YEAST	1	1.60582	1.01606	40 min	0 min
40 min / 0 min	P18239	P18239	0.0689054	0.0689054	0.120403	120	0.134328	0.134328	P18239	PET9	ADP,ATP carrier protein 2	ADT2_YEAST	17	4.89205	1.04892	40 min	0 min
40 min / 0 min	P18409	P18409	-0.428424	0.428424	0.398649	10	-0.401229	0.401229	P18409	MDM10	Mitochondrial distribution and morphology protein 10	MDM10_YEAST	2	-25.6927	0.743073	40 min	0 min
40 min / 0 min	P18414	P18414	0.284786	0.284786	0.652462	5	0.90043	0.90043	P18414	ERD2	ER lumen protein-retaining receptor	ERD2_YEAST	1	21.823	1.21823	40 min	0 min
40 min / 0 min	P18480	P18480	0.131886	0.131886	0.756433	15	-0.0434517	0.0434517	P18480	SNF5	SWI/SNF chromatin-remodeling complex subunit SNF5	SNF5_YEAST	3	9.57254	1.09573	40 min	0 min
40 min / 0 min	P18494	P18494	0.0865129	0.0865129	0.62955	15	0.33387	0.33387	P18494	GLN3	Nitrogen regulatory protein GLN3	GLN3_YEAST	3	6.18007	1.0618	40 min	0 min
40 min / 0 min	P18496	P18496	-0.0366013	0.0366013	0.512535	20	-0.595037	0.595037	P18496	ATP10	Mitochondrial ATPase complex subunit ATP10	ATP10_YEAST	4	-2.5051	0.974949	40 min	0 min
40 min / 0 min	P18544	P18544	-0.0863235	0.0863235	0.692241	145	-0.0623445	0.0623445	P18544	ARG8	Acetylornithine aminotransferase, mitochondrial	ARGD_YEAST	20	-5.808	0.94192	40 min	0 min
40 min / 0 min	P18562	P18562	-0.113161	0.113161	0.799473	60	-0.000566269	0.000566269	P18562	FUR1	Uracil phosphoribosyltransferase	UPP_YEAST	10	-7.54398	0.92456	40 min	0 min
40 min / 0 min	P18759	P18759	0.0179268	0.0179268	0.747723	130	-0.0301678	0.0301678	P18759	SEC18	Vesicular-fusion protein SEC18	SEC18_YEAST	22	1.25034	1.0125	40 min	0 min
40 min / 0 min	P18851	P18851	0.0099221	0.0099221	0.659835	30	-0.0863761	0.0863761	P18851	STE4	Guanine nucleotide-binding protein subunit beta	GBB_YEAST	5	0.690118	1.0069	40 min	0 min
40 min / 0 min	P18852	P18852	-0.187862	0.187862	0.610718	5	-0.202688	0.202688	P18852	STE18	Guanine nucleotide-binding protein subunit gamma	GBG_YEAST	1	-12.2094	0.877906	40 min	0 min
40 min / 0 min	P18898	P18898	-0.106754	0.106754	0.587813	5	-0.115657	0.115657	P18898	CDC43	Geranylgeranyl transferase type-1 subunit beta	PGTB1_YEAST	1	-7.13249	0.928675	40 min	0 min
40 min / 0 min	P18899	P18899	-0.0152015	0.0152015	0.515966	50	-0.548209	0.548209	P18899	DDR48	Stress protein DDR48	DDR48_YEAST	8	-1.04816	0.989518	40 min	0 min
40 min / 0 min	P18900	P18900	0.161201	0.161201	0.453908	45	0.095631	0.095631	P18900	COQ1	Hexaprenyl pyrophosphate synthase, mitochondrial	COQ1_YEAST	9	11.8218	1.11822	40 min	0 min
40 min / 0 min	P18962	P18962	0.0829148	0.0829148	0.77939	75	-0.0153988	0.0153988	P18962	DAP2	Dipeptidyl aminopeptidase B	DAP2_YEAST	14	5.91557	1.05916	40 min	0 min
40 min / 0 min	P18963	P18963	0.0968415	0.0968415	0.683208	25	-0.206827	0.206827	P18963	IRA1	Inhibitory regulator protein IRA1	IRA1_YEAST	5	6.94296	1.06943	40 min	0 min
40 min / 0 min	P19073	P19073	-0.113959	0.113959	0.664877	35	-0.0653014	0.0653014	P19073	CDC42	Cell division control protein 42	CDC42_YEAST	6	-7.59512	0.924049	40 min	0 min
40 min / 0 min	P19097	P19097	0.272074	0.272074	0.617857	800	0.034195	0.034195	P19097	FAS2	Fatty acid synthase subunit alpha	FAS2_YEAST	106	20.7542	1.20754	40 min	0 min
40 min / 0 min	P19145	P19145	0.312821	0.312821	0.045801	35	0.563019	0.563019	P19145	GAP1	General amino-acid permease GAP1	GAP1_YEAST	7	24.2134	1.24213	40 min	0 min
40 min / 0 min	P19146	P19146	0.0586006	0.0586006	0.403165	65	-0.24388	0.24388	P19146	ARF2	ADP-ribosylation factor 2	ARF2_YEAST	9	4.14551	1.04146	40 min	0 min
40 min / 0 min	P19158	P19158	-0.0786757	0.0786757	0.499546	35	0.662385	0.662385	P19158	IRA2	Inhibitory regulator protein IRA2	IRA2_YEAST	7	-5.30735	0.946926	40 min	0 min
40 min / 0 min	P19262	P19262	0.0104862	0.0104862	0.696512	55	-0.0323247	0.0323247	P19262	KGD2	Dihydrolipoyllysine-residue succinyltransferase component of 2-oxoglutarate dehydrogenase complex, mitochondrial	ODO2_YEAST	8	0.729496	1.00729	40 min	0 min
40 min / 0 min	P19263	P19263	0.227761	0.227761	0.517418	20	0.153638	0.153638	P19263	RGR1	Mediator of RNA polymerase II transcription subunit 14	MED14_YEAST	4	17.1016	1.17102	40 min	0 min
40 min / 0 min	P19358	P19358	0.0942488	0.0942488	0.0826144	100	0.273409	0.273409	P19358	SAM2	S-adenosylmethionine synthase 2	METK2_YEAST	14	6.75094	1.06751	40 min	0 min
40 min / 0 min	P19414	P19414	0.0580387	0.0580387	0.374872	400	0.111129	0.111129	P19414	ACO1	Aconitate hydratase, mitochondrial	ACON_YEAST	47	4.10495	1.04105	40 min	0 min
40 min / 0 min	P19454	P19454	-0.0445925	0.0445925	0.61835	55	0.0984967	0.0984967	P19454	CKA2	Casein kinase II subunit alpha'	CSK22_YEAST	10	-3.04364	0.969564	40 min	0 min
40 min / 0 min	P19516	P19516	0.00259197	0.00259197	0.792478	5	0.00730858	0.00730858	P19516	COX11	Cytochrome c oxidase assembly protein COX11, mitochondrial	COX11_YEAST	1	0.179823	1.0018	40 min	0 min
40 min / 0 min	P19524	P19524	0.111858	0.111858	0.595822	270	0.0567596	0.0567596	P19524	MYO2	Myosin-2	MYO2_YEAST	51	8.06193	1.08062	40 min	0 min
40 min / 0 min	P19658	P19658	-0.0111067	0.0111067	0.616879	20	-0.112339	0.112339	P19658	EXO70	Exocyst complex component EXO70	EXO70_YEAST	4	-0.766905	0.992331	40 min	0 min
40 min / 0 min	P19659	P19659	0.241854	0.241854	0.41655	20	0.4573	0.4573	P19659	GAL11	Mediator of RNA polymerase II transcription subunit 15	MED15_YEAST	4	18.2511	1.18251	40 min	0 min
40 min / 0 min	P19735	P19735	0.765907	0.765907	0.6561	20	0.190721	0.190721	P19735	PRP6	Pre-mRNA-splicing factor 6	PRP6_YEAST	4	70.0438	1.70044	40 min	0 min
40 min / 0 min	P19736	P19736	0.111699	0.111699	0.750907	5	0.123025	0.123025	P19736	PRP9	Pre-mRNA-splicing factor PRP9	PRP9_YEAST	1	8.05002	1.0805	40 min	0 min
40 min / 0 min	P19807	P19807	0.0486892	0.0486892	0.541852	30	0.249578	0.249578	P19807	HNM1	Choline transport protein	HNM1_YEAST	6	3.43247	1.03432	40 min	0 min
40 min / 0 min	P19812	P19812	-0.00521048	0.00521048	0.647806	75	0.119225	0.119225	P19812	UBR1	E3 ubiquitin-protein ligase UBR1	UBR1_YEAST	14	-0.360512	0.996395	40 min	0 min
40 min / 0 min	P19880	P19880	0.217806	0.217806	0.12171	35	0.267885	0.267885	P19880	YAP1	AP-1-like transcription factor YAP1	YAP1_YEAST	7	16.2963	1.16296	40 min	0 min
40 min / 0 min	P19881	P19881	-0.0394767	0.0394767	0.587401	65	-0.0986319	0.0986319	P19881	PHO13	4-nitrophenylphosphatase	PNPP_YEAST	11	-2.69922	0.973008	40 min	0 min
40 min / 0 min	P19882	P19882	0.0653714	0.0653714	0.629991	255	0.0390229	0.0390229	P19882	HSP60	Heat shock protein 60, mitochondrial	HSP60_YEAST	36	4.63543	1.04635	40 min	0 min
40 min / 0 min	P19955	P19955	0.0552284	0.0552284	0.631088	20	0.235633	0.235633	P19955	YMR31	37S ribosomal protein YMR-31, mitochondrial	RT31_YEAST	3	3.90236	1.03902	40 min	0 min
40 min / 0 min	P20049	P20049	-0.0364057	0.0364057	0.690693	50	0.117174	0.117174	P20049	TYR1	Prephenate dehydrogenase [NADP(+)]	TYR1_YEAST	8	-2.49188	0.975081	40 min	0 min
40 min / 0 min	P20051	P20051	-0.0405277	0.0405277	0.61376	80	0.155353	0.155353	P20051	URA4	Dihydroorotase	PYRC_YEAST	11	-2.77007	0.972299	40 min	0 min
40 min / 0 min	P20053	P20053	-0.12292	0.12292	0.776255	20	-0.0229343	0.0229343	P20053	PRP4	U4/U6 small nuclear ribonucleoprotein PRP4	PRP4_YEAST	4	-8.16729	0.918327	40 min	0 min
40 min / 0 min	P20081	P20081	0.0131247	0.0131247	0.655975	40	0.12024	0.12024	P20081	FPR1	FK506-binding protein 1	FKBP_YEAST	6	0.913883	1.00914	40 min	0 min
40 min / 0 min	P20084	P20084	0.081746	0.081746	0.608223	20	0.133469	0.133469	P20084	MRPL33	54S ribosomal protein L33, mitochondrial	RM33_YEAST	3	5.8298	1.0583	40 min	0 min
40 min / 0 min	P20095	P20095	0.0178987	0.0178987	0.67048	10	-0.283147	0.283147	P20095	PRP2	Pre-mRNA-splicing factor ATP-dependent RNA helicase-like protein PRP2	PRP2_YEAST	2	1.24837	1.01248	40 min	0 min
40 min / 0 min	P20107	P20107	-0.0266735	0.0266735	0.717008	25	-0.0827265	0.0827265	P20107	ZRC1	Zinc/cadmium resistance protein	ZRC1_YEAST	4	-1.83188	0.981681	40 min	0 min
40 min / 0 min	P20424	P20424	-0.0391921	0.0391921	0.726794	55	-0.06575	0.06575	P20424	SRP54	Signal recognition particle subunit SRP54	SRP54_YEAST	11	-2.68002	0.9732	40 min	0 min
40 min / 0 min	P20433	P20433	-0.1278	0.1278	0.61376	35	-0.113492	0.113492	P20433	RPB4	DNA-directed RNA polymerase II subunit RPB4	RPB4_YEAST	6	-8.47739	0.915226	40 min	0 min
40 min / 0 min	P20434	P20434	-0.0663493	0.0663493	0.659902	25	-0.0911975	0.0911975	P20434	RPB5	DNA-directed RNA polymerases I, II, and III subunit RPABC1	RPAB1_YEAST	4	-4.49483	0.955052	40 min	0 min
40 min / 0 min	P20435	P20435	-0.269847	0.269847	0.55047	10	-0.247567	0.247567	P20435	RPO26	DNA-directed RNA polymerases I, II, and III subunit RPABC2	RPAB2_YEAST	3	-17.0592	0.829408	40 min	0 min
40 min / 0 min	P20436	P20436	-0.0987083	0.0987083	0.731312	35	-0.049632	0.049632	P20436	RPB8	DNA-directed RNA polymerases I, II, and III subunit RPABC3	RPAB3_YEAST	5	-6.61312	0.933869	40 min	0 min
40 min / 0 min	P20447	P20447	0.0109769	0.0109769	0.681395	115	-0.072001	0.072001	P20447	DBP3	ATP-dependent RNA helicase DBP3	DBP3_YEAST	17	0.763764	1.00764	40 min	0 min
40 min / 0 min	P20448	P20448	0.150702	0.150702	0.666837	40	0.0578528	0.0578528	P20448	HCA4	ATP-dependent RNA helicase HCA4	DBP4_YEAST	8	11.011	1.11011	40 min	0 min
40 min / 0 min	P20449	P20449	0.00804906	0.00804906	0.661362	130	-0.068115	0.068115	P20449	DBP5	ATP-dependent RNA helicase DBP5	DBP5_YEAST	20	0.559478	1.00559	40 min	0 min
40 min / 0 min	P20457	P20457	0.0354878	0.0354878	0.552621	30	0.271393	0.271393	P20457	PRI2	DNA primase large subunit	PRI2_YEAST	5	2.49033	1.0249	40 min	0 min
40 min / 0 min	P20459	P20459	0.0677182	0.0677182	0.569659	100	-0.06328	0.06328	P20459	SUI2	Eukaryotic translation initiation factor 2 subunit alpha	IF2A_YEAST	16	4.80578	1.04806	40 min	0 min
40 min / 0 min	P20484	P20484	-0.0466217	0.0466217	0.623945	35	0.0619617	0.0619617	P20484	MAK11	Protein MAK11	MAK11_YEAST	6	-3.17991	0.968201	40 min	0 min
40 min / 0 min	P20485	P20485	0.133481	0.133481	0.774987	75	0.0273206	0.0273206	P20485	CKI1	Choline kinase	KICH_YEAST	14	9.69372	1.09694	40 min	0 min
40 min / 0 min	P20486	P20486	-0.14754	0.14754	0.598318	25	-0.0837471	0.0837471	P20486	CKS1	Cyclin-dependent kinases regulatory subunit	CKS1_YEAST	5	-9.72112	0.902789	40 min	0 min
40 min / 0 min	P20604	P20604	0.0665492	0.0665492	0.464951	50	0.259134	0.259134	P20604	SIT4	Serine/threonine-protein phosphatase PP1-1	PP11_YEAST	7	4.72088	1.04721	40 min	0 min
40 min / 0 min	P20606	P20606	-0.0376251	0.0376251	0.743216	75	-0.0169634	0.0169634	P20606	SAR1	Small COPII coat GTPase SAR1	SAR1_YEAST	12	-2.57426	0.974257	40 min	0 min
40 min / 0 min	P20676	P20676	-0.131834	0.131834	0.792217	50	-0.00413575	0.00413575	P20676	NUP1	Nucleoporin NUP1	NUP1_YEAST	10	-8.73297	0.91267	40 min	0 min
40 min / 0 min	P20967	P20967	0.147572	0.147572	0.0822989	160	0.21146	0.21146	P20967	KGD1	2-oxoglutarate dehydrogenase, mitochondrial	ODO1_YEAST	27	10.7703	1.1077	40 min	0 min
40 min / 0 min	P21147	P21147	0.0926832	0.0926832	0.54475	90	0.249002	0.249002	P21147	OLE1	Acyl-CoA desaturase 1	ACO1_YEAST	12	6.63516	1.06635	40 min	0 min
40 min / 0 min	P21182	P21182	-0.047713	0.047713	0.661297	35	0.0846877	0.0846877	P21182	SPE2	S-adenosylmethionine decarboxylase proenzyme	DCAM_YEAST	6	-3.25312	0.967469	40 min	0 min
40 min / 0 min	P21242	P21242	-0.0148293	0.0148293	0.497897	65	0.432898	0.432898	P21242	PRE10	Probable proteasome subunit alpha type-7	PSA7_YEAST	11	-1.02262	0.989774	40 min	0 min
40 min / 0 min	P21243	P21243	-0.000453964	0.000453964	0.568221	115	-0.0600113	0.0600113	P21243	SCL1	Proteasome subunit alpha type-1	PSA1_YEAST	18	-0.0314615	0.999685	40 min	0 min
40 min / 0 min	P21264	P21264	-0.0215261	0.0215261	0.725743	220	-0.0414326	0.0414326	P21264	ADE2	Phosphoribosylaminoimidazole carboxylase	PUR6_YEAST	30	-1.481	0.98519	40 min	0 min
40 min / 0 min	P21269	P21269	0.0203785	0.0203785	0.591511	50	0.17324	0.17324	P21269	CCA1	CCA tRNA nucleotidyltransferase, mitochondrial	CCA1_YEAST	9	1.42255	1.01423	40 min	0 min
40 min / 0 min	P21304	P21304	0.163376	0.163376	0.402405	95	0.1415	0.1415	P21304	PWP1	Periodic tryptophan protein 1	PWP1_YEAST	17	11.9904	1.1199	40 min	0 min
40 min / 0 min	P21306	P21306	-0.101523	0.101523	0.581749	20	-0.0959011	0.0959011	P21306	ATP15	ATP synthase subunit epsilon, mitochondrial	ATP5E_YEAST	4	-6.79516	0.932048	40 min	0 min
40 min / 0 min	P21339	P21339	-0.0287442	0.0287442	0.738202	15	-0.0938281	0.0938281	P21339	MSB1	Morphogenesis-related protein MSB1	MSB1_YEAST	3	-1.97268	0.980273	40 min	0 min
40 min / 0 min	P21373	P21373	-0.298176	0.298176	0.244485	25	-0.46794	0.46794	P21373	UTR1	NAD(+) kinase	UTR1_YEAST	5	-18.672	0.81328	40 min	0 min
40 min / 0 min	P21375	P21375	-0.00368369	0.00368369	0.769388	50	-0.0223826	0.0223826	P21375	OSM1	Fumarate reductase 2	OSM1_YEAST	9	-0.255009	0.99745	40 min	0 min
40 min / 0 min	P21524	P21524	-0.0660127	0.0660127	0.753587	160	0.0381366	0.0381366	P21524	RNR1	Ribonucleoside-diphosphate reductase large chain 1	RIR1_YEAST	26	-4.47255	0.955275	40 min	0 min
40 min / 0 min	P21538	P21538	-0.0471909	0.0471909	0.762404	70	0.0219271	0.0219271	P21538	REB1	DNA-binding protein REB1	REB1_YEAST	14	-3.21811	0.967819	40 min	0 min
40 min / 0 min	P21560	P21560	-0.185312	0.185312	0.436744	35	-0.232856	0.232856	P21560	CBP3	Protein CBP3, mitochondrial	CBP3_YEAST	7	-12.0541	0.879459	40 min	0 min
40 min / 0 min	P21576	P21576	0.0250795	0.0250795	0.721083	205	0.0420058	0.0420058	P21576	VPS1	Vacuolar protein sorting-associated protein 1	VPS1_YEAST	32	1.75358	1.01754	40 min	0 min
40 min / 0 min	P21734	P21734	-0.00929316	0.00929316	0.6554	50	-0.0933541	0.0933541	P21734	UBC1	Ubiquitin-conjugating enzyme E2 1	UBC1_YEAST	9	-0.642082	0.993579	40 min	0 min
40 min / 0 min	P21771	P21771	-0.0932496	0.0932496	0.668258	25	-0.214901	0.214901	P21771	MRPS28	37S ribosomal protein S28, mitochondrial	RT28_YEAST	5	-6.25911	0.937409	40 min	0 min
40 min / 0 min	P21801	P21801	-0.0221403	0.0221403	0.627924	45	0.219622	0.219622	P21801	SDH2	Succinate dehydrogenase [ubiquinone] iron-sulfur subunit, mitochondrial	SDHB_YEAST	8	-1.52293	0.984771	40 min	0 min
40 min / 0 min	P21825	P21825	-0.0502836	0.0502836	0.782469	35	-0.00815418	0.00815418	P21825	SEC62	Translocation protein SEC62	SEC62_YEAST	7	-3.42535	0.965746	40 min	0 min
40 min / 0 min	P21827	P21827	0.0153095	0.0153095	0.74377	75	-0.0343526	0.0343526	P21827	SRM1	Guanine nucleotide exchange factor SRM1	RCC1_YEAST	12	1.06682	1.01067	40 min	0 min
40 min / 0 min	P21951	P21951	-0.0539422	0.0539422	0.627892	65	-0.133568	0.133568	P21951	POL2	DNA polymerase epsilon catalytic subunit A	DPOE_YEAST	11	-3.66995	0.9633	40 min	0 min
40 min / 0 min	P21954	P21954	0.00826327	0.00826327	0.539143	235	0.0828094	0.0828094	P21954	IDP1	Isocitrate dehydrogenase [NADP], mitochondrial	IDHP_YEAST	28	0.57441	1.00574	40 min	0 min
40 min / 0 min	P21957	P21957	0.0515579	0.0515579	0.768552	20	-0.045484	0.045484	P21957	OPI1	Transcriptional repressor OPI1	OPI1_YEAST	4	3.63835	1.03638	40 min	0 min
40 min / 0 min	P21965	P21965	0.10172	0.10172	0.555823	115	0.0932978	0.0932978	P21965	MCK1	Protein kinase MCK1	MCK1_YEAST	16	7.3052	1.07305	40 min	0 min
40 min / 0 min	P22007	P22007	0.408452	0.408452	0.560707	10	0.255795	0.255795	P22007	RAM1	Protein farnesyltransferase subunit beta	FNTB_YEAST	2	32.7261	1.32726	40 min	0 min
40 min / 0 min	P22023	P22023	0.181246	0.181246	0.617857	70	0.157059	0.157059	P22023	KRE5	Killer toxin-resistance protein 5	KRE5_YEAST	15	13.3863	1.13386	40 min	0 min
40 min / 0 min	P22082	P22082	0.298246	0.298246	0.0629056	55	0.418873	0.418873	P22082	SNF2	Transcription regulatory protein SNF2	SNF2_YEAST	10	22.9648	1.22965	40 min	0 min
40 min / 0 min	P22108	P22108	-0.375529	0.375529	0.533217	15	-0.659624	0.659624	P22108	APA2	Diadenosine 5',5'''-P1,P4-tetraphosphate phosphorylase 2	APA2_YEAST	3	-22.9177	0.770823	40 min	0 min
40 min / 0 min	P22133	P22133	-0.141502	0.141502	0.36665	20	-0.156948	0.156948	P22133	MDH2	Malate dehydrogenase, cytoplasmic	MDHC_YEAST	4	-9.3425	0.906575	40 min	0 min
40 min / 0 min	P22134	P22134	0.140355	0.140355	0.772045	20	-0.0512115	0.0512115	P22134	MAG1	DNA-3-methyladenine glycosylase	MAG_YEAST	5	10.2176	1.10218	40 min	0 min
40 min / 0 min	P22135	P22135	0.320256	0.320256	0.740334	15	0.110463	0.110463	P22135	ATP12	Protein ATP12, mitochondrial	ATP12_YEAST	4	24.8552	1.24855	40 min	0 min
40 min / 0 min	P22136	P22136	0.668007	0.668007	0.549753	10	0.761499	0.761499	P22136	AEP2	ATPase expression protein 2, mitochondrial	AEP2_YEAST	2	58.8877	1.58888	40 min	0 min
40 min / 0 min	P22137	P22137	0.0705385	0.0705385	0.486863	405	0.0834205	0.0834205	P22137	CHC1	Clathrin heavy chain	CLH_YEAST	67	5.01086	1.05011	40 min	0 min
40 min / 0 min	P22138	P22138	0.0241297	0.0241297	0.546189	275	-0.13627	0.13627	P22138	RPA135	DNA-directed RNA polymerase I subunit RPA135	RPA2_YEAST	41	1.68661	1.01687	40 min	0 min
40 min / 0 min	P22139	P22139	0.155793	0.155793	0.534323	10	0.156402	0.156402	P22139	RPB10	DNA-directed RNA polymerases I, II, and III subunit RPABC5	RPAB5_YEAST	1	11.4034	1.11403	40 min	0 min
40 min / 0 min	P22140	P22140	0.0505422	0.0505422	0.745506	15	0.0536258	0.0536258	P22140	EPT1	Choline/ethanolaminephosphotransferase 1	EPT1_YEAST	2	3.56541	1.03565	40 min	0 min
40 min / 0 min	P22141	P22141	0.00899504	0.00899504	0.577976	50	0.0899295	0.0899295	P22141	PRE1	Proteasome subunit beta type-4	PSB4_YEAST	8	0.625436	1.00625	40 min	0 min
40 min / 0 min	P22146	P22146	0.0927818	0.0927818	0.733495	80	0.085498	0.085498	P22146	GAS1	1,3-beta-glucanosyltransferase GAS1	GAS1_YEAST	11	6.64245	1.06642	40 min	0 min
40 min / 0 min	P22147	P22147	0.0355234	0.0355234	0.324469	265	0.14995	0.14995	P22147	XRN1	5'-3' exoribonuclease 1	XRN1_YEAST	43	2.49286	1.02493	40 min	0 min
40 min / 0 min	P22202	P22202	-0.211109	0.211109	0.73688	15	-0.10327	0.10327	P22202	SSA4	Heat shock protein SSA4	HSP74_YEAST	4	-13.6127	0.863873	40 min	0 min
40 min / 0 min	P22203	P22203	0.0923212	0.0923212	0.563715	135	-0.0796408	0.0796408	P22203	VMA4	V-type proton ATPase subunit E	VATE_YEAST	16	6.60841	1.06608	40 min	0 min
40 min / 0 min	P22204	P22204	-0.0420202	0.0420202	0.7754	40	-0.0208213	0.0208213	P22204	DBF2	Cell cycle protein kinase DBF2	DBF2_YEAST	8	-2.87061	0.971294	40 min	0 min
40 min / 0 min	P22209	P22209	-5.63354	5.63354	0.595603	10	-1.60343	1.60343	P22209	KIN3	Serine/threonine-protein kinase KIN3	KIN3_YEAST	2	-97.9856	0.0201435	40 min	0 min
40 min / 0 min	P22211	P22211	-0.00235928	0.00235928	0.581749	45	0.146459	0.146459	P22211	NPR1	Nitrogen permease reactivator protein	NPR1_YEAST	8	-0.163399	0.998366	40 min	0 min
40 min / 0 min	P22213	P22213	-0.172542	0.172542	0.481106	75	-0.131089	0.131089	P22213	SLY1	Protein SLY1	SLY1_YEAST	16	-11.2722	0.887278	40 min	0 min
40 min / 0 min	P22214	P22214	-0.00551323	0.00551323	0.60718	25	-0.282937	0.282937	P22214	SEC22	Protein transport protein SEC22	SEC22_YEAST	5	-0.381419	0.996186	40 min	0 min
40 min / 0 min	P22215	P22215	-0.220697	0.220697	0.585012	10	1.78347	1.78347	P22215	SLY41	Uncharacterized transporter SLY41	SLY41_YEAST	1	-14.1849	0.858151	40 min	0 min
40 min / 0 min	P22216	P22216	0.14604	0.14604	0.549753	10	0.164655	0.164655	P22216	RAD53	Serine/threonine-protein kinase RAD53	RAD53_YEAST	2	10.6528	1.10653	40 min	0 min
40 min / 0 min	P22217	P22217	-0.128335	0.128335	0.547105	45	-0.163508	0.163508	P22217	TRX1	Thioredoxin-1	TRX1_YEAST	6	-8.51134	0.914887	40 min	0 min
40 min / 0 min	P22219	P22219	0.297843	0.297843	0.794318	10	-0.0350287	0.0350287	P22219	VPS15	Serine/threonine-protein kinase VPS15	VPS15_YEAST	2	22.9305	1.22931	40 min	0 min
40 min / 0 min	P22224	P22224	0.0119212	0.0119212	0.587813	30	-0.094046	0.094046	P22224	SEC15	Exocyst complex component SEC15	SEC15_YEAST	6	0.829741	1.0083	40 min	0 min
40 min / 0 min	P22276	P22276	0.025116	0.025116	0.800935	80	0.000253137	0.000253137	P22276	RET1	DNA-directed RNA polymerase III subunit RPC2	RPC2_YEAST	16	1.75615	1.01756	40 min	0 min
40 min / 0 min	P22336	P22336	-0.0426574	0.0426574	0.579251	70	0.235259	0.235259	P22336	RFA1	Replication factor A protein 1	RFA1_YEAST	13	-2.9135	0.970865	40 min	0 min
40 min / 0 min	P22353	P22353	-0.263295	0.263295	0.473526	10	-0.287244	0.287244	P22353	MRPL8	54S ribosomal protein L8, mitochondrial	RM08_YEAST	2	-16.6817	0.833183	40 min	0 min
40 min / 0 min	P22354	P22354	-0.0802979	0.0802979	0.629786	10	-0.0848353	0.0848353	P22354	MRPL20	54S ribosomal protein L20, mitochondrial	RM20_YEAST	2	-5.41377	0.945862	40 min	0 min
40 min / 0 min	P22434	P22434	-0.0539632	0.0539632	0.730682	10	0.106313	0.106313	P22434	PDE1	3',5'-cyclic-nucleotide phosphodiesterase 1	PDE1_YEAST	2	-3.67135	0.963286	40 min	0 min
40 min / 0 min	P22438	P22438	-0.0734602	0.0734602	0.731376	5	-0.0764227	0.0764227	P22438	MSM1	Methionine--tRNA ligase, mitochondrial	SYMM_YEAST	1	-4.96441	0.950356	40 min	0 min
40 min / 0 min	P22470	P22470	0.0325325	0.0325325	0.637521	20	-0.115807	0.115807	P22470	SAN1	Protein SAN1	SAN1_YEAST	5	2.2806	1.02281	40 min	0 min
40 min / 0 min	P22515	P22515	0.156348	0.156348	0.580002	315	0.0805367	0.0805367	P22515	UBA1	Ubiquitin-activating enzyme E1 1	UBA1_YEAST	45	11.4462	1.11446	40 min	0 min
40 min / 0 min	P22517	P22517	-0.0126672	0.0126672	0.641974	30	-0.0640457	0.0640457	P22517	CMK2	Calcium/calmodulin-dependent protein kinase II	KCC2_YEAST	6	-0.874179	0.991258	40 min	0 min
40 min / 0 min	P22543	P22543	-1.1698	1.1698	0.357311	10	-1.40725	1.40725	P22543	VPS34	Phosphatidylinositol 3-kinase VPS34	VPS34_YEAST	2	-55.5518	0.444482	40 min	0 min
40 min / 0 min	P22579	P22579	0.0760122	0.0760122	0.74812	70	-0.029588	0.029588	P22579	SIN3	Transcriptional regulatory protein SIN3	SIN3_YEAST	14	5.41004	1.0541	40 min	0 min
40 min / 0 min	P22696	P22696	-0.0814359	0.0814359	0.529083	50	-0.285089	0.285089	P22696	ESS1	Peptidyl-prolyl cis-trans isomerase ESS1	ESS1_YEAST	7	-5.48835	0.945117	40 min	0 min
40 min / 0 min	P22768	P22768	-0.0397243	0.0397243	0.749057	245	-0.0173047	0.0173047	P22768	ARG1	Argininosuccinate synthase	ASSY_YEAST	30	-2.71591	0.972841	40 min	0 min
40 min / 0 min	P22803	P22803	-0.102515	0.102515	0.0722581	55	-0.20857	0.20857	P22803	TRX2	Thioredoxin-2	TRX2_YEAST	7	-6.85921	0.931408	40 min	0 min
40 min / 0 min	P22804	P22804	-0.199752	0.199752	0.547637	15	-0.23877	0.23877	P22804	BET1	Protein transport protein BET1	BET1_YEAST	3	-12.93	0.8707	40 min	0 min
40 min / 0 min	P22855	P22855	-0.414549	0.414549	0.714417	15	-0.160662	0.160662	P22855	AMS1	Alpha-mannosidase	MAN1_YEAST	3	-24.9746	0.750254	40 min	0 min
40 min / 0 min	P22936	P22936	-0.022888	0.022888	0.576706	65	0.35396	0.35396	P22936	APN1	DNA-(apurinic or apyrimidinic site) lyase 1	APN1_YEAST	11	-1.57396	0.98426	40 min	0 min
40 min / 0 min	P22943	P22943	0.194517	0.194517	0.435184	40	0.262891	0.262891	P22943	HSP12	12 kDa heat shock protein	HSP12_YEAST	7	14.4341	1.14434	40 min	0 min
40 min / 0 min	P23180	P23180	-0.122953	0.122953	0.572718	40	-0.0921928	0.0921928	P23180	AIM17	Probable oxidoreductase AIM17	AIM17_YEAST	7	-8.16937	0.918306	40 min	0 min
40 min / 0 min	P23201	P23201	0.0519923	0.0519923	0.591494	120	0.140507	0.140507	P23201	SPA2	Protein SPA2	SPA2_YEAST	24	3.66956	1.0367	40 min	0 min
40 min / 0 min	P23202	P23202	0.000647276	0.000647276	0.723637	45	-0.105675	0.105675	P23202	URE2	Transcriptional regulator URE2	URE2_YEAST	7	0.0448759	1.00045	40 min	0 min
40 min / 0 min	P23248	P23248	0.044564	0.044564	0.62571	40	0.0486502	0.0486502	P23248	RPS1B	40S ribosomal protein S1-B	RS3A2_YEAST	7	3.13714	1.03137	40 min	0 min
40 min / 0 min	P23250	P23250	-0.150013	0.150013	0.596172	5	-0.16041	0.16041	P23250	RPI1	Negative RAS protein regulator protein	RPI1_YEAST	1	-9.87579	0.901242	40 min	0 min
40 min / 0 min	P23254	P23254	0.240357	0.240357	0.0211109	230	0.173615	0.173615	P23254	TKL1	Transketolase 1	TKT1_YEAST	31	18.1285	1.18128	40 min	0 min
40 min / 0 min	P23255	P23255	0.0118103	0.0118103	0.652247	30	0.170919	0.170919	P23255	TAF2	Transcription initiation factor TFIID subunit 2	TAF2_YEAST	6	0.821988	1.00822	40 min	0 min
40 min / 0 min	P23285	P23285	0.0449854	0.0449854	0.631449	15	0.114091	0.114091	P23285	CPR2	Peptidyl-prolyl cis-trans isomerase B	CYPB_YEAST	3	3.16728	1.03167	40 min	0 min
40 min / 0 min	P23287	P23287	-0.0962492	0.0962492	0.582891	50	-0.172445	0.172445	P23287	CNA1	Serine/threonine-protein phosphatase 2B catalytic subunit A1	PP2B1_YEAST	9	-6.45381	0.935462	40 min	0 min
40 min / 0 min	P23291	P23291	0.0887184	0.0887184	0.772794	85	-0.010815	0.010815	P23291	YCK1	Casein kinase I homolog 1	KC11_YEAST	12	6.34251	1.06343	40 min	0 min
40 min / 0 min	P23292	P23292	-0.0062777	0.0062777	0.698439	65	0.050415	0.050415	P23292	YCK2	Casein kinase I homolog 2	KC12_YEAST	11	-0.434192	0.995658	40 min	0 min
40 min / 0 min	P23293	P23293	-0.314966	0.314966	0.518543	25	-0.502136	0.502136	P23293	SGV1	Serine/threonine-protein kinase BUR1	BUR1_YEAST	4	-19.613	0.80387	40 min	0 min
40 min / 0 min	P23301	P23301	0.300873	0.300873	0.756433	90	0.0231195	0.0231195	P23301	HYP2	Eukaryotic translation initiation factor 5A-1	IF5A1_YEAST	10	23.1889	1.23189	40 min	0 min
40 min / 0 min	P23337	P23337	0.016453	0.016453	0.723372	15	0.068617	0.068617	P23337	GSY1	Glycogen [starch] synthase isoform 1	GYS1_YEAST	3	1.14696	1.01147	40 min	0 min
40 min / 0 min	P23369	P23369	0.0328451	0.0328451	0.715424	10	0.0885048	0.0885048	P23369	MRPL25	54S ribosomal protein L25, mitochondrial	RM25_YEAST	2	2.30277	1.02303	40 min	0 min
40 min / 0 min	P23394	P23394	0.0497943	0.0497943	0.742013	20	0.0485072	0.0485072	P23394	PRP28	Pre-mRNA-splicing ATP-dependent RNA helicase PRP28	PRP28_YEAST	4	3.51174	1.03512	40 min	0 min
40 min / 0 min	P23503	P23503	0.09089	0.09089	0.654687	30	-0.0621229	0.0621229	P23503	NAR1	Cytosolic Fe-S cluster assembly factor NAR1	NAR1_YEAST	6	6.5027	1.06503	40 min	0 min
40 min / 0 min	P23542	P23542	-0.116759	0.116759	0.662808	190	-0.0457816	0.0457816	P23542	AAT2	Aspartate aminotransferase, cytoplasmic	AATC_YEAST	25	-7.77429	0.922257	40 min	0 min
40 min / 0 min	P23585	P23585	-1.53543	1.53543	0.544637	15	-0.602202	0.602202	P23585	HXT2	High-affinity glucose transporter HXT2	HXT2_YEAST	3	-65.5025	0.344975	40 min	0 min
40 min / 0 min	P23594	P23594	-0.207839	0.207839	0.474957	10	-0.201596	0.201596	P23594	PPH21	Serine/threonine-protein phosphatase PP2A-1 catalytic subunit	PP2A1_YEAST	2	-13.4167	0.865833	40 min	0 min
40 min / 0 min	P23595	P23595	-0.0667224	0.0667224	0.511084	60	-0.15769	0.15769	P23595	PPH22	Serine/threonine-protein phosphatase PP2A-2 catalytic subunit	PP2A2_YEAST	10	-4.51953	0.954805	40 min	0 min
40 min / 0 min	P23615	P23615	0.0529313	0.0529313	0.542846	235	0.0886648	0.0886648	P23615	SPT6	Transcription elongation factor SPT6	SPT6_YEAST	41	3.73705	1.03737	40 min	0 min
40 min / 0 min	P23638	P23638	-0.134185	0.134185	0.591238	60	0.216325	0.216325	P23638	PRE9	Proteasome subunit alpha type-3	PSA3_YEAST	10	-8.88154	0.911185	40 min	0 min
40 min / 0 min	P23639	P23639	-0.0255922	0.0255922	0.671114	55	-0.0830301	0.0830301	P23639	PRE8	Proteasome subunit alpha type-2	PSA2_YEAST	10	-1.75828	0.982417	40 min	0 min
40 min / 0 min	P23641	P23641	0.0622533	0.0622533	0.772045	80	0.00884662	0.00884662	P23641	MIR1	Mitochondrial phosphate carrier protein	MPCP_YEAST	14	4.40952	1.0441	40 min	0 min
40 min / 0 min	P23642	P23642	-0.0308233	0.0308233	0.669921	55	0.0958673	0.0958673	P23642	VAN1	Mannan polymerase I complex VAN1 subunit	VAN1_YEAST	9	-2.11385	0.978862	40 min	0 min
40 min / 0 min	P23644	P23644	-0.0458195	0.0458195	0.625644	45	-0.0496968	0.0496968	P23644	TOM40	Mitochondrial import receptor subunit TOM40	TOM40_YEAST	8	-3.12606	0.968739	40 min	0 min
40 min / 0 min	P23724	P23724	-0.0470651	0.0470651	0.408584	50	-0.144531	0.144531	P23724	PRE7	Proteasome subunit beta type-6	PSB6_YEAST	9	-3.20966	0.967903	40 min	0 min
40 min / 0 min	P23776	P23776	-0.0833559	0.0833559	0.286199	75	-0.129826	0.129826	P23776	EXG1	Glucan 1,3-beta-glucosidase I/II	EXG1_YEAST	11	-5.61404	0.94386	40 min	0 min
40 min / 0 min	P23796	P23796	-0.49892	0.49892	0.628577	5	-0.729042	0.729042	P23796	RIT1	tRNA A64-2'-O-ribosylphosphate transferase	RIT1_YEAST	1	-29.2364	0.707636	40 min	0 min
40 min / 0 min	P23833	P23833	-0.156384	0.156384	0.562024	10	-0.199103	0.199103	P23833	SCO1	Protein SCO1, mitochondrial	SCO1_YEAST	2	-10.2729	0.897271	40 min	0 min
40 min / 0 min	P23900	P23900	0.0977176	0.0977176	0.77458	10	0.0369268	0.0369268	P23900	FPS1	Glycerol uptake/efflux facilitator protein	FPS1_YEAST	2	7.00792	1.07008	40 min	0 min
40 min / 0 min	P23968	P23968	-1.48949	1.48949	0.608475	5	-0.7277	0.7277	P23968	VMA16	V-type proton ATPase subunit c''	VATO_YEAST	1	-64.3861	0.356139	40 min	0 min
40 min / 0 min	P24000	P24000	0.108553	0.108553	0.6618	20	0.0736637	0.0736637	P24000	RPL24B	60S ribosomal protein L24-B	RL24B_YEAST	2	7.8146	1.07815	40 min	0 min
40 min / 0 min	P24004	P24004	0.695134	0.695134	0.755493	20	-0.0851843	0.0851843	P24004	PEX1	Peroxisomal ATPase PEX1	PEX1_YEAST	4	61.9035	1.61903	40 min	0 min
40 min / 0 min	P24031	P24031	0.0234965	0.0234965	0.725743	30	0.030294	0.030294	P24031	PHO3	Constitutive acid phosphatase	PPA3_YEAST	6	1.64199	1.01642	40 min	0 min
40 min / 0 min	P24276	P24276	0.0929256	0.0929256	0.201215	150	0.197442	0.197442	P24276	SSD1	Protein SSD1	SSD1_YEAST	26	6.65308	1.06653	40 min	0 min
40 min / 0 min	P24279	P24279	-0.0117111	0.0117111	0.797124	105	0.00318218	0.00318218	P24279	MCM3	DNA replication licensing factor MCM3	MCM3_YEAST	21	-0.808468	0.991915	40 min	0 min
40 min / 0 min	P24280	P24280	0.0357398	0.0357398	0.671316	150	0.0547182	0.0547182	P24280	SEC14	SEC14 cytosolic factor	SEC14_YEAST	21	2.50823	1.02508	40 min	0 min
40 min / 0 min	P24384	P24384	-0.0272744	0.0272744	0.748678	5	-0.0683084	0.0683084	P24384	PRP22	Pre-mRNA-splicing factor ATP-dependent RNA helicase PRP22	PRP22_YEAST	1	-1.87276	0.981272	40 min	0 min
40 min / 0 min	P24482	P24482	0.0597404	0.0597404	0.794655	15	0.00446718	0.00446718	P24482	DPB2	DNA polymerase epsilon subunit B	DPB2_YEAST	3	4.22782	1.04228	40 min	0 min
40 min / 0 min	P24521	P24521	-0.0903879	0.0903879	0.764446	60	0.0328973	0.0328973	P24521	ERG8	Phosphomevalonate kinase	ERG8_YEAST	11	-6.07298	0.93927	40 min	0 min
40 min / 0 min	P24583	P24583	-0.113846	0.113846	0.694683	50	-0.077107	0.077107	P24583	PKC1	Protein kinase C-like 1	KPC1_YEAST	8	-7.5879	0.924121	40 min	0 min
40 min / 0 min	P24783	P24783	0.309728	0.309728	0.105024	190	0.205168	0.205168	P24783	DBP2	ATP-dependent RNA helicase DBP2	DBP2_YEAST	26	23.9474	1.23947	40 min	0 min
40 min / 0 min	P24784	P24784	-0.488443	0.488443	0.57188	5	-0.709563	0.709563	P24784	DBP1	ATP-dependent RNA helicase DBP1	DBP1_YEAST	1	-28.7206	0.712794	40 min	0 min
40 min / 0 min	P25037	P25037	-0.0781635	0.0781635	0.367907	60	-0.441813	0.441813	P25037	UBP1	Ubiquitin carboxyl-terminal hydrolase 1	UBP1_YEAST	10	-5.27373	0.947263	40 min	0 min
40 min / 0 min	P25039	P25039	0.0515278	0.0515278	0.658794	45	0.136043	0.136043	P25039	MEF1	Elongation factor G, mitochondrial	EFGM_YEAST	9	3.63619	1.03636	40 min	0 min
40 min / 0 min	P25040	P25040	0.0127027	0.0127027	0.551309	70	0.145631	0.145631	P25040	TSR4	20S rRNA accumulation protein 4	TSR4_YEAST	11	0.884373	1.00884	40 min	0 min
40 min / 0 min	P25043	P25043	-0.145595	0.145595	0.1818	35	-0.288972	0.288972	P25043	PUP1	Proteasome subunit beta type-2	PSB2_YEAST	7	-9.59936	0.904006	40 min	0 min
40 min / 0 min	P25044	P25044	-0.125085	0.125085	0.586606	10	-0.137156	0.137156	P25044	PTP1	Tyrosine-protein phosphatase 1	PTP1_YEAST	2	-8.30502	0.91695	40 min	0 min
40 min / 0 min	P25045	P25045	0.0422716	0.0422716	0.715789	60	0.104768	0.104768	P25045	LCB1	Serine palmitoyltransferase 1	LCB1_YEAST	10	2.97339	1.02973	40 min	0 min
40 min / 0 min	P25046	P25046	-0.648656	0.648656	0.285697	5	-0.659639	0.659639	P25046	ROX3	Mediator of RNA polymerase II transcription subunit 19	MED19_YEAST	1	-36.2126	0.637874	40 min	0 min
40 min / 0 min	P25087	P25087	0.0358195	0.0358195	0.77458	180	-0.0135921	0.0135921	P25087	ERG6	Sterol 24-C-methyltransferase	ERG6_YEAST	21	2.5139	1.02514	40 min	0 min
40 min / 0 min	P25270	P25270	0.00490898	0.00490898	0.701996	15	-0.197407	0.197407	P25270	MRM1	rRNA methyltransferase 1, mitochondrial	MRM1_YEAST	3	0.340844	1.00341	40 min	0 min
40 min / 0 min	P25293	P25293	0.0685598	0.0685598	0.774996	90	-0.0109654	0.0109654	P25293	NAP1	Nucleosome assembly protein	NAP1_YEAST	12	4.86693	1.04867	40 min	0 min
40 min / 0 min	P25294	P25294	-0.089281	0.089281	0.775056	120	-0.0314311	0.0314311	P25294	SIS1	Protein SIS1	SIS1_YEAST	19	-6.00089	0.939991	40 min	0 min
40 min / 0 min	P25296	P25296	-0.135526	0.135526	0.572014	25	0.508614	0.508614	P25296	CNB1	Calcineurin subunit B	CANB_YEAST	5	-8.96621	0.910338	40 min	0 min
40 min / 0 min	P25298	P25298	-0.0669155	0.0669155	0.570516	45	0.196449	0.196449	P25298	RNA14	mRNA 3'-end-processing protein RNA14	RNA14_YEAST	9	-4.53231	0.954677	40 min	0 min
40 min / 0 min	P25299	P25299	-0.113431	0.113431	0.792478	25	-0.00691305	0.00691305	P25299	RNA15	mRNA 3'-end-processing protein RNA15	RNA15_YEAST	5	-7.56129	0.924387	40 min	0 min
40 min / 0 min	P25302	P25302	1.23975	1.23975	0.381485	15	1.18939	1.18939	P25302	SWI4	Regulatory protein SWI4	SWI4_YEAST	3	136.157	2.36157	40 min	0 min
40 min / 0 min	P25303	P25303	-0.0504118	0.0504118	0.600192	50	-0.0791121	0.0791121	P25303	SCJ1	DnaJ-related protein SCJ1	SCJ1_YEAST	10	-3.43393	0.965661	40 min	0 min
40 min / 0 min	P25332	P25332	-0.119355	0.119355	0.536604	25	-0.308879	0.308879	P25332	RBK1	Probable ribokinase	RBSK_YEAST	4	-7.94006	0.920599	40 min	0 min
40 min / 0 min	P25333	P25333	-0.605157	0.605157	0.587122	10	-0.698077	0.698077	P25333	SAT4	Serine/threonine-protein kinase HAL4/SAT4	HAL4_YEAST	2	-34.26	0.6574	40 min	0 min
40 min / 0 min	P25334	P25334	-0.69244	0.69244	0.00899652	10	-0.708349	0.708349	P25334	CPR4	Peptidyl-prolyl cis-trans isomerase CPR4	CYPR_YEAST	2	-38.1193	0.618807	40 min	0 min
40 min / 0 min	P25336	P25336	0.388816	0.388816	0.68959	10	0.225206	0.225206	P25336	MSH3	DNA mismatch repair protein MSH3	MSH3_YEAST	2	30.9318	1.30932	40 min	0 min
40 min / 0 min	P25339	P25339	0.151727	0.151727	0.583057	35	0.414147	0.414147	P25339	PUF4	Pumilio homology domain family member 4	PUF4_YEAST	7	11.0899	1.1109	40 min	0 min
40 min / 0 min	P25340	P25340	0.091759	0.091759	0.796083	55	0.00553599	0.00553599	P25340	ERG4	Delta(24(24(1)))-sterol reductase	ERG4_YEAST	9	6.56687	1.06567	40 min	0 min
40 min / 0 min	P25342	P25342	-0.179222	0.179222	0.55967	40	-0.523318	0.523318	P25342	CDC10	Cell division control protein 10	CDC10_YEAST	7	-11.6821	0.883179	40 min	0 min
40 min / 0 min	P25343	P25343	0.00988384	0.00988384	0.569247	60	-0.0506313	0.0506313	P25343	RVS161	Reduced viability upon starvation protein 161	RV161_YEAST	11	0.687448	1.00687	40 min	0 min
40 min / 0 min	P25344	P25344	-0.182752	0.182752	0.585673	20	-0.249151	0.249151	P25344	STE50	Protein STE50	STE50_YEAST	4	-11.8979	0.881021	40 min	0 min
40 min / 0 min	P25345	P25345	-0.112826	0.112826	0.6218	10	-0.120955	0.120955	P25345	SLM5	Asparagine--tRNA ligase, mitochondrial	SYNM_YEAST	2	-7.52253	0.924775	40 min	0 min
40 min / 0 min	P25349	P25349	-0.0656838	0.0656838	0.764732	60	-0.0619065	0.0619065	P25349	YCP4	Flavoprotein-like protein YCP4	YCP4_YEAST	9	-4.45077	0.955492	40 min	0 min
40 min / 0 min	P25351	P25351	-0.345593	0.345593	0.645146	10	-0.447066	0.447066	P25351	YCR023C	Uncharacterized membrane protein YCR023C	YCR3_YEAST	2	-21.3015	0.786985	40 min	0 min
40 min / 0 min	P25353	P25353	-0.43857	0.43857	0.538071	10	-0.695489	0.695489	P25353	NPP1	Ectonucleotide pyrophosphatase/phosphodiesterase 1	NPP1_YEAST	2	-26.2134	0.737866	40 min	0 min
40 min / 0 min	P25355	P25355	-0.0222511	0.0222511	0.586606	30	-0.213325	0.213325	P25355	CTR86	Copper transport protein 86	CTR86_YEAST	6	-1.5305	0.984695	40 min	0 min
40 min / 0 min	P25357	P25357	0.156048	0.156048	0.792153	25	0.0390599	0.0390599	P25357	SNT1	Probable DNA-binding protein SNT1	SNT1_YEAST	5	11.423	1.11423	40 min	0 min
40 min / 0 min	P25358	P25358	-0.0229229	0.0229229	0.708018	5	-0.0222428	0.0222428	P25358	ELO2	Elongation of fatty acids protein 2	ELO2_YEAST	1	-1.57634	0.984237	40 min	0 min
40 min / 0 min	P25359	P25359	-0.0465328	0.0465328	0.521177	30	-0.0887459	0.0887459	P25359	RRP43	Exosome complex component RRP43	RRP43_YEAST	6	-3.17395	0.968261	40 min	0 min
40 min / 0 min	P25360	P25360	-0.971865	0.971865	0.517418	20	-0.495432	0.495432	P25360	PHO87	Inorganic phosphate transporter PHO87	PHO87_YEAST	3	-49.0153	0.509847	40 min	0 min
40 min / 0 min	P25361	P25361	-0.135478	0.135478	0.638437	10	-0.183639	0.183639	P25361	YCR043C	Uncharacterized protein YCR043C	YCT3_YEAST	2	-8.9632	0.910368	40 min	0 min
40 min / 0 min	P25365	P25365	0.669756	0.669756	0.706549	10	0.532669	0.532669	P25365	SED4	Putative guanine nucleotide-exchange factor SED4	SED4_YEAST	2	59.0804	1.5908	40 min	0 min
40 min / 0 min	P25366	P25366	-0.0387387	0.0387387	0.755493	10	-0.0364518	0.0364518	P25366	OCA4	Protein OCA4	OCA4_YEAST	2	-2.64943	0.973506	40 min	0 min
40 min / 0 min	P25367	P25367	-0.0977375	0.0977375	0.711293	45	-0.0944395	0.0944395	P25367	RNQ1	[PIN+] prion protein RNQ1	RNQ1_YEAST	5	-6.55027	0.934497	40 min	0 min
40 min / 0 min	P25368	P25368	0.100915	0.100915	0.511632	25	0.130316	0.130316	P25368	RRP7	Ribosomal RNA-processing protein 7	RRP7_YEAST	6	7.24533	1.07245	40 min	0 min
40 min / 0 min	P25369	P25369	-0.0256814	0.0256814	0.551309	25	0.417685	0.417685	P25369	LSB5	LAS seventeen-binding protein 5	LSB5_YEAST	5	-1.76435	0.982357	40 min	0 min
40 min / 0 min	P25371	P25371	-0.0360878	0.0360878	0.731441	55	-0.0560858	0.0560858	P25371	ADP1	Probable ATP-dependent permease	ADP1_YEAST	10	-2.47039	0.975296	40 min	0 min
40 min / 0 min	P25372	P25372	0.0812398	0.0812398	0.528333	25	1.37771	1.37771	P25372	TRX3	Thioredoxin-3, mitochondrial	TRX3_YEAST	4	5.79268	1.05793	40 min	0 min
40 min / 0 min	P25373	P25373	-0.0484344	0.0484344	0.420238	55	-0.103112	0.103112	P25373	GRX1	Glutaredoxin-1	GLRX1_YEAST	8	-3.30149	0.966985	40 min	0 min
40 min / 0 min	P25374	P25374	0.000343677	0.000343677	0.756388	65	0.049887	0.049887	P25374	NFS1	Cysteine desulfurase, mitochondrial	NFS1_YEAST	11	0.0238247	1.00024	40 min	0 min
40 min / 0 min	P25375	P25375	-0.106247	0.106247	0.537638	130	-0.147198	0.147198	P25375	PRD1	Saccharolysin	PRTD_YEAST	22	-7.09983	0.929002	40 min	0 min
40 min / 0 min	P25376	P25376	0.158534	0.158534	0.283723	65	0.245459	0.245459	P25376	AGP1	General amino acid permease AGP1	AGP1_YEAST	10	11.6152	1.11615	40 min	0 min
40 min / 0 min	P25378	P25378	-0.139901	0.139901	0.702229	5	-0.173191	0.173191	P25378	RHB1	Rheb-like protein RHB1	RHEB_YEAST	1	-9.24184	0.907582	40 min	0 min
40 min / 0 min	P25382	P25382	0.106864	0.106864	0.420073	35	0.238268	0.238268	P25382	RSA4	Ribosome assembly protein 4	NLE1_YEAST	7	7.68847	1.07688	40 min	0 min
40 min / 0 min	P25383	P25383	-0.0367622	0.0367622	0.796581	5	-0.0186568	0.0186568	P25383	TY2A-C	Transposon Ty2-C Gag polyprotein	YC21A_YEAST	1	-2.51597	0.97484	40 min	0 min
40 min / 0 min	P25384	P25384	0.344167	0.344167	0.52581	55	0.431293	0.431293	P25384	TY2B-C	Transposon Ty2-C Gag-Pol polyprotein	YC21B_YEAST	10	26.9418	1.26942	40 min	0 min
40 min / 0 min	P25385	P25385	0.0974206	0.0974206	0.690242	40	-0.0559215	0.0559215	P25385	BOS1	Protein transport protein BOS1	BOS1_YEAST	7	6.98589	1.06986	40 min	0 min
40 min / 0 min	P25386	P25386	0.136048	0.136048	0.710931	125	0.0381594	0.0381594	P25386	USO1	Intracellular protein transport protein USO1	USO1_YEAST	24	9.88905	1.09889	40 min	0 min
40 min / 0 min	P25441	P25441	0.00652891	0.00652891	0.691231	25	-0.0440721	0.0440721	P25441	RPC53	DNA-directed RNA polymerase III subunit RPC4	RPC4_YEAST	4	0.453575	1.00454	40 min	0 min
40 min / 0 min	P25443	P25443	0.0535709	0.0535709	0.693059	95	0.0676869	0.0676869	P25443	RPS2	40S ribosomal protein S2	RS2_YEAST	13	3.78305	1.03783	40 min	0 min
40 min / 0 min	P25451	P25451	-0.120439	0.120439	0.476876	30	-0.427969	0.427969	P25451	PUP3	Proteasome subunit beta type-3	PSB3_YEAST	5	-8.00924	0.919908	40 min	0 min
40 min / 0 min	P25454	P25454	0.559122	0.559122	0.660749	10	0.399856	0.399856	P25454	RAD51	DNA repair protein RAD51	RAD51_YEAST	2	47.3372	1.47337	40 min	0 min
40 min / 0 min	P25491	P25491	0.0474373	0.0474373	0.546189	185	0.0891971	0.0891971	P25491	YDJ1	Mitochondrial protein import protein MAS5	MAS5_YEAST	22	3.34276	1.03343	40 min	0 min
40 min / 0 min	P25515	P25515	0.140187	0.140187	0.59573	5	0.16143	0.16143	P25515	VMA3	V-type proton ATPase subunit c	VATL1_YEAST	1	10.2048	1.10205	40 min	0 min
40 min / 0 min	P25554	P25554	0.00777651	0.00777651	0.771875	10	-0.0386215	0.0386215	P25554	SGF29	SAGA-associated factor 29	SGF29_YEAST	3	0.540482	1.0054	40 min	0 min
40 min / 0 min	P25555	P25555	0.016155	0.016155	0.702828	95	-0.0525069	0.0525069	P25555	GBP2	Single-strand telomeric DNA-binding protein GBP2	GBP2_YEAST	15	1.12608	1.01126	40 min	0 min
40 min / 0 min	P25558	P25558	0.0513478	0.0513478	0.651139	45	0.170236	0.170236	P25558	BUD3	Bud site selection protein 3	BUD3_YEAST	9	3.62325	1.03623	40 min	0 min
40 min / 0 min	P25559	P25559	-0.0280847	0.0280847	0.662808	15	-0.0602718	0.0602718	P25559	DCC1	Sister chromatid cohesion protein DCC1	DCC1_YEAST	3	-1.92786	0.980721	40 min	0 min
40 min / 0 min	P25560	P25560	-0.047447	0.047447	0.625644	20	0.0938565	0.0938565	P25560	RER1	Protein RER1	RER1_YEAST	3	-3.23528	0.967647	40 min	0 min
40 min / 0 min	P25566	P25566	-0.0990134	0.0990134	0.77238	20	0.0291668	0.0291668	P25566	MXR2	Peptide methionine sulfoxide reductase 2	MXR2_YEAST	4	-6.63287	0.933671	40 min	0 min
40 min / 0 min	P25567	P25567	0.0150986	0.0150986	0.515426	60	0.139112	0.139112	P25567	SRO9	RNA-binding protein SRO9	SRO9_YEAST	10	1.05205	1.01052	40 min	0 min
40 min / 0 min	P25569	P25569	-0.066812	0.066812	0.646492	10	-0.183103	0.183103	P25569	GID7	Glucose-induced degradation protein 7	GID7_YEAST	2	-4.52545	0.954745	40 min	0 min
40 min / 0 min	P25572	P25572	0.222256	0.222256	0.633722	5	0.312603	0.312603	P25572	YCL042W	Putative uncharacterized protein YCL042W	YCE2_YEAST	1	16.6557	1.16656	40 min	0 min
40 min / 0 min	P25573	P25573	0.012753	0.012753	0.720531	25	0.0562833	0.0562833	P25573	MGR1	Mitochondrial inner membrane i-AAA protease supercomplex subunit MGR1	MGR1_YEAST	5	0.887892	1.00888	40 min	0 min
40 min / 0 min	P25574	P25574	0.0852469	0.0852469	0.554298	80	0.110332	0.110332	P25574	EMC1	ER membrane protein complex subunit 1	EMC1_YEAST	12	6.08693	1.06087	40 min	0 min
40 min / 0 min	P25576	P25576	-0.11086	0.11086	0.631214	10	-0.117268	0.117268	P25576	POF1	Nicotinamide mononucleotide adenylyltransferase	POF1_YEAST	2	-7.39641	0.926036	40 min	0 min
40 min / 0 min	P25578	P25578	0.0876	0.0876	0.780725	5	-0.0650693	0.0650693	P25578	PGS1	CDP-diacylglycerol--glycerol-3-phosphate 3-phosphatidyltransferase	PGPS1_YEAST	1	6.2601	1.0626	40 min	0 min
40 min / 0 min	P25580	P25580	-0.0743682	0.0743682	0.778902	25	0.0341989	0.0341989	P25580	PBN1	Protein PBN1	PBN1_YEAST	6	-5.0242	0.949758	40 min	0 min
40 min / 0 min	P25582	P25582	0.139084	0.139084	0.636058	70	0.188236	0.188236	P25582	SPB1	27S pre-rRNA (guanosine(2922)-2'-O)-methyltransferase	SPB1_YEAST	12	10.1205	1.10121	40 min	0 min
40 min / 0 min	P25586	P25586	-0.159631	0.159631	0.582766	60	0.15441	0.15441	P25586	KRR1	KRR1 small subunit processome component	KRR1_YEAST	11	-10.4746	0.895254	40 min	0 min
40 min / 0 min	P25604	P25604	0.0230164	0.0230164	0.771524	10	0.0195493	0.0195493	P25604	STP22	Suppressor protein STP22 of temperature-sensitive alpha-factor receptor and arginine permease	STP22_YEAST	2	1.60817	1.01608	40 min	0 min
40 min / 0 min	P25605	P25605	-0.0377976	0.0377976	0.595069	105	0.220493	0.220493	P25605	ILV6	Acetolactate synthase small subunit, mitochondrial	ILV6_YEAST	13	-2.58591	0.974141	40 min	0 min
40 min / 0 min	P25617	P25617	-0.0298059	0.0298059	0.684995	30	0.0892238	0.0892238	P25617	YCR016W	Uncharacterized protein YCR016W	YCQ6_YEAST	6	-2.04479	0.979552	40 min	0 min
40 min / 0 min	P25618	P25618	-0.0563343	0.0563343	0.516843	20	-0.596425	0.596425	P25618	CWH43	Protein CWH43	CWH43_YEAST	4	-3.82954	0.961705	40 min	0 min
40 min / 0 min	P25623	P25623	-0.0130073	0.0130073	0.614992	115	-0.0525347	0.0525347	P25623	SYP1	Suppressor of yeast profilin deletion	SYP1_YEAST	22	-0.897545	0.991025	40 min	0 min
40 min / 0 min	P25626	P25626	-0.0344929	0.0344929	0.750764	35	0.0253012	0.0253012	P25626	IMG1	54S ribosomal protein IMG1, mitochondrial	IMG1_YEAST	7	-2.36251	0.976375	40 min	0 min
40 min / 0 min	P25627	P25627	0.0380844	0.0380844	0.730682	15	0.0665103	0.0665103	P25627	BUD23	18S rRNA (guanine(1575)-N(7))-methyltransferase	BUD23_YEAST	3	2.67496	1.02675	40 min	0 min
40 min / 0 min	P25628	P25628	0.174209	0.174209	0.596315	5	0.167737	0.167737	P25628	ARE1	Sterol O-acyltransferase 1	ARE1_YEAST	1	12.8345	1.12835	40 min	0 min
40 min / 0 min	P25631	P25631	-0.104109	0.104109	0.78857	50	-0.00666402	0.00666402	P25631	YCR051W	Ankyrin repeat-containing protein YCR051W	YCU1_YEAST	9	-6.96207	0.930379	40 min	0 min
40 min / 0 min	P25632	P25632	0.248593	0.248593	0.626314	40	0.163309	0.163309	P25632	RSC6	Chromatin structure-remodeling complex protein RSC6	RSC6_YEAST	7	18.8048	1.18805	40 min	0 min
40 min / 0 min	P25635	P25635	0.0612344	0.0612344	0.54475	55	0.120444	0.120444	P25635	PWP2	Periodic tryptophan protein 2	PWP2_YEAST	11	4.33581	1.04336	40 min	0 min
40 min / 0 min	P25638	P25638	-0.305711	0.305711	0.775502	25	0.0916217	0.0916217	P25638	TAH1	TPR repeat-containing protein associated with Hsp90	TAH1_YEAST	3	-19.0956	0.809044	40 min	0 min
40 min / 0 min	P25639	P25639	0.0689061	0.0689061	0.754551	5	0.0599542	0.0599542	P25639	YCR061W	Uncharacterized membrane protein YCR061W	YCV1_YEAST	1	4.8921	1.04892	40 min	0 min
40 min / 0 min	P25642	P25642	-0.0287714	0.0287714	0.715297	15	-0.0436128	0.0436128	P25642	IMG2	54S ribosomal protein IMG2, mitochondrial	IMG2_YEAST	3	-1.97453	0.980255	40 min	0 min
40 min / 0 min	P25644	P25644	0.0640753	0.0640753	0.448551	50	0.10917	0.10917	P25644	PAT1	DNA topoisomerase 2-associated protein PAT1	PAT1_YEAST	10	4.54146	1.04541	40 min	0 min
40 min / 0 min	P25651	P25651	-0.235676	0.235676	0.448551	10	-0.240747	0.240747	P25651	CSM1	Monopolin complex subunit CSM1	CSM1_YEAST	2	-15.0713	0.849287	40 min	0 min
40 min / 0 min	P25654	P25654	-0.0748221	0.0748221	0.724307	25	-0.0408322	0.0408322	P25654	YCR090C	UPF0587 protein YCR090C	YCY0_YEAST	4	-5.05408	0.949459	40 min	0 min
40 min / 0 min	P25655	P25655	0.0921509	0.0921509	0.626947	130	0.0462847	0.0462847	P25655	CDC39	General negative regulator of transcription subunit 1	NOT1_YEAST	26	6.59582	1.06596	40 min	0 min
40 min / 0 min	P25656	P25656	-0.451879	0.451879	0.625724	5	-0.673817	0.673817	P25656	CDC50	Cell division control protein 50	CDC50_YEAST	1	-26.891	0.73109	40 min	0 min
40 min / 0 min	P25659	P25659	-0.2012	0.2012	0.614257	5	-0.212285	0.212285	P25659	FUB1	Silencing boundary-establishment protein FUB1	FUB1_YEAST	1	-13.0173	0.869827	40 min	0 min
40 min / 0 min	P25694	P25694	0.0636974	0.0636974	0.765529	330	-0.0145033	0.0145033	P25694	CDC48	Cell division control protein 48	CDC48_YEAST	40	4.51409	1.04514	40 min	0 min
40 min / 0 min	P25719	P25719	-0.0723425	0.0723425	0.672553	35	-0.0407011	0.0407011	P25719	CPR3	Peptidyl-prolyl cis-trans isomerase C, mitochondrial	CYPC_YEAST	6	-4.89076	0.951092	40 min	0 min
40 min / 0 min	P25808	P25808	0.016891	0.016891	0.64675	30	-0.070267	0.070267	P25808	SPB4	ATP-dependent rRNA helicase SPB4	SPB4_YEAST	6	1.17767	1.01178	40 min	0 min
40 min / 0 min	P25846	P25846	0.0502095	0.0502095	0.797203	5	-0.011728	0.011728	P25846	MSH1	DNA mismatch repair protein MSH1, mitochondrial	MSH1_YEAST	1	3.54153	1.03542	40 min	0 min
40 min / 0 min	P25847	P25847	0.0846484	0.0846484	0.759676	60	0.0286651	0.0286651	P25847	MSH2	DNA mismatch repair protein MSH2	MSH2_YEAST	12	6.04293	1.06043	40 min	0 min
40 min / 0 min	P26263	P26263	0.0948561	0.0948561	0.787354	5	0.0301763	0.0301763	P26263	PDC6	Pyruvate decarboxylase isozyme 3	PDC6_YEAST	1	6.79588	1.06796	40 min	0 min
40 min / 0 min	P26321	P26321	0.0262826	0.0262826	0.780555	75	0.013199	0.013199	P26321	RPL5	60S ribosomal protein L5	RL5_YEAST	13	1.83847	1.01838	40 min	0 min
40 min / 0 min	P26370	P26370	-0.322115	0.322115	0.551309	5	-0.308018	0.308018	P26370	UGA3	Transcriptional activator protein UGA3	UGA3_YEAST	1	-20.0104	0.799896	40 min	0 min
40 min / 0 min	P26570	P26570	0.0709301	0.0709301	0.584912	25	0.557841	0.557841	P26570	PPZ1	Serine/threonine-protein phosphatase PP-Z1	PPZ1_YEAST	4	5.03936	1.05039	40 min	0 min
40 min / 0 min	P26637	P26637	0.130668	0.130668	0.426552	350	0.126203	0.126203	P26637	CDC60	Leucine--tRNA ligase, cytoplasmic	SYLC_YEAST	54	9.48006	1.0948	40 min	0 min
40 min / 0 min	P26754	P26754	-0.182943	0.182943	0.448551	20	-0.255776	0.255776	P26754	RFA2	Replication factor A protein 2	RFA2_YEAST	5	-11.9096	0.880904	40 min	0 min
40 min / 0 min	P26755	P26755	-0.20042	0.20042	0.642357	15	-0.938302	0.938302	P26755	RFA3	Replication factor A protein 3	RFA3_YEAST	3	-12.9703	0.870297	40 min	0 min
40 min / 0 min	P26783	P26783	0.04151	0.04151	0.559908	125	0.229436	0.229436	P26783	RPS5	40S ribosomal protein S5	RS5_YEAST	15	2.91904	1.02919	40 min	0 min
40 min / 0 min	P26784	P26784	0.032922	0.032922	0.677033	75	0.0585447	0.0585447	P26784	RPL16A	60S ribosomal protein L16-A	RL16A_YEAST	10	2.30822	1.02308	40 min	0 min
40 min / 0 min	P26785	P26785	0.0043223	0.0043223	0.556333	90	0.245278	0.245278	P26785	RPL16B	60S ribosomal protein L16-B	RL16B_YEAST	16	0.300048	1.003	40 min	0 min
40 min / 0 min	P26786	P26786	0.166934	0.166934	0.651429	50	0.37203	0.37203	P26786	RPS7A	40S ribosomal protein S7-A	RS7A_YEAST	7	12.267	1.12267	40 min	0 min
40 min / 0 min	P26793	P26793	0.194198	0.194198	0.517418	65	0.354185	0.354185	P26793	RAD27	Flap endonuclease 1	FEN1_YEAST	10	14.4088	1.14409	40 min	0 min
40 min / 0 min	P27351	P27351	-0.137833	0.137833	0.725092	25	0.0927042	0.0927042	P27351	APL1	AP-2 complex subunit beta	AP2B_YEAST	5	-9.11164	0.908884	40 min	0 min
40 min / 0 min	P27466	P27466	0.268233	0.268233	0.701566	20	0.0962164	0.0962164	P27466	CMK1	Calcium/calmodulin-dependent protein kinase I	KCC1_YEAST	4	20.4332	1.20433	40 min	0 min
40 min / 0 min	P27472	P27472	-0.0235196	0.0235196	0.712118	70	-0.0183306	0.0183306	P27472	GSY2	Glycogen [starch] synthase isoform 2	GYS2_YEAST	14	-1.61704	0.98383	40 min	0 min
40 min / 0 min	P27476	P27476	0.0316083	0.0316083	0.60802	160	0.0723861	0.0723861	P27476	NSR1	Nuclear localization sequence-binding protein	NSR1_YEAST	21	2.2151	1.02215	40 min	0 min
40 min / 0 min	P27514	P27514	0.0524549	0.0524549	0.591435	35	0.205126	0.205126	P27514	PHO91	Low-affinity phosphate transporter PHO91	PHO91_YEAST	6	3.7028	1.03703	40 min	0 min
40 min / 0 min	P27515	P27515	-0.108554	0.108554	0.723314	10	-0.132831	0.132831	P27515	URK1	Uridine kinase	URK1_YEAST	2	-7.2483	0.927517	40 min	0 min
40 min / 0 min	P27614	P27614	-0.0603147	0.0603147	0.457999	90	0.14427	0.14427	P27614	CPS1	Carboxypeptidase S	CBPS_YEAST	16	-4.09451	0.959055	40 min	0 min
40 min / 0 min	P27616	P27616	-0.0936969	0.0936969	0.373928	140	-0.187273	0.187273	P27616	ADE1	Phosphoribosylaminoimidazole-succinocarboxamide synthase	PUR7_YEAST	22	-6.28817	0.937118	40 min	0 min
40 min / 0 min	P27637	P27637	-0.115445	0.115445	0.48929	20	-0.269063	0.269063	P27637	BUD14	Bud site selection protein 14	BUD14_YEAST	4	-7.69027	0.923097	40 min	0 min
40 min / 0 min	P27680	P27680	0.0801851	0.0801851	0.733465	15	0.115933	0.115933	P27680	COQ3	Ubiquinone biosynthesis O-methyltransferase, mitochondrial	COQ3_YEAST	3	5.71537	1.05715	40 min	0 min
40 min / 0 min	P27692	P27692	0.0353033	0.0353033	0.448551	155	-0.0887307	0.0887307	P27692	SPT5	Transcription elongation factor SPT5	SPT5_YEAST	28	2.47722	1.02477	40 min	0 min
40 min / 0 min	P27697	P27697	0.0429168	0.0429168	0.692241	20	-0.139135	0.139135	P27697	COQ8	Atypical kinase COQ8, mitochondrial	COQ8_YEAST	4	3.01946	1.03019	40 min	0 min
40 min / 0 min	P27705	P27705	0.234471	0.234471	0.534289	10	0.170258	0.170258	P27705	MIG1	Regulatory protein MIG1	MIG1_YEAST	2	17.6475	1.17648	40 min	0 min
40 min / 0 min	P27801	P27801	-2.15192	2.15192	0.603323	10	-0.753265	0.753265	P27801	PEP3	Vacuolar membrane protein PEP3	PEP3_YEAST	2	-77.4987	0.225013	40 min	0 min
40 min / 0 min	P27809	P27809	0.15383	0.15383	0.631449	60	-0.125604	0.125604	P27809	KRE2	Glycolipid 2-alpha-mannosyltransferase	KRE2_YEAST	8	11.2519	1.11252	40 min	0 min
40 min / 0 min	P27810	P27810	0.162386	0.162386	0.0685547	70	0.184122	0.184122	P27810	KTR1	Alpha-1,2 mannosyltransferase KTR1	KTR1_YEAST	13	11.9137	1.11914	40 min	0 min
40 min / 0 min	P27825	P27825	0.31265	0.31265	0.653599	5	0.453161	0.453161	P27825	CNE1	Calnexin homolog	CALX_YEAST	1	24.1987	1.24199	40 min	0 min
40 min / 0 min	P27882	P27882	-0.00203231	0.00203231	0.340403	35	-0.241316	0.241316	P27882	ERV1	Mitochondrial FAD-linked sulfhydryl oxidase ERV1	ERV1_YEAST	7	-0.14077	0.998592	40 min	0 min
40 min / 0 min	P27929	P27929	0.0685246	0.0685246	0.64155	55	0.0440189	0.0440189	P27929	NAM9	37S ribosomal protein NAM9, mitochondrial	NAM9_YEAST	10	4.86437	1.04864	40 min	0 min
40 min / 0 min	P27999	P27999	-0.0997299	0.0997299	0.567702	25	-0.116757	0.116757	P27999	RPB9	DNA-directed RNA polymerase II subunit RPB9	RPB9_YEAST	5	-6.67923	0.933208	40 min	0 min
40 min / 0 min	P28000	P28000	-0.0265469	0.0265469	0.636821	45	-0.0789637	0.0789637	P28000	RPC19	DNA-directed RNA polymerases I and III subunit RPAC2	RPAC2_YEAST	6	-1.82327	0.981767	40 min	0 min
40 min / 0 min	P28005	P28005	-0.503323	0.503323	0.506437	5	-0.545265	0.545265	P28005	POP5	Ribonuclease P/MRP protein subunit POP5	POP5_YEAST	1	-29.452	0.70548	40 min	0 min
40 min / 0 min	P28007	P28007	0.0138048	0.0138048	0.800652	25	-0.000272093	0.000272093	P28007	GAR1	H/ACA ribonucleoprotein complex subunit 1	GAR1_YEAST	4	0.961467	1.00961	40 min	0 min
40 min / 0 min	P28239	P28239	-0.0631605	0.0631605	0.567024	20	-0.125788	0.125788	P28239	PPA2	Inorganic pyrophosphatase, mitochondrial	IPYR2_YEAST	4	-4.28351	0.957165	40 min	0 min
40 min / 0 min	P28241	P28241	-0.0273978	0.0273978	0.651429	55	-0.061334	0.061334	P28241	IDH2	Isocitrate dehydrogenase [NAD] subunit 2, mitochondrial	IDH2_YEAST	11	-1.88115	0.981188	40 min	0 min
40 min / 0 min	P28263	P28263	0.3926	0.3926	0.563715	5	0.498821	0.498821	P28263	UBC8	Ubiquitin-conjugating enzyme E2-24 kDa	UBC8_YEAST	1	31.2757	1.31276	40 min	0 min
40 min / 0 min	P28272	P28272	-0.0304084	0.0304084	0.656538	65	0.0556653	0.0556653	P28272	URA1	Dihydroorotate dehydrogenase (fumarate)	PYRD_YEAST	10	-2.08569	0.979143	40 min	0 min
40 min / 0 min	P28273	P28273	0.0679326	0.0679326	0.696472	100	0.0355352	0.0355352	P28273	OXP1	5-oxoprolinase	OPLA_YEAST	20	4.82135	1.04821	40 min	0 min
40 min / 0 min	P28274	P28274	0.083809	0.083809	0.572764	195	0.114932	0.114932	P28274	URA7	CTP synthase 1	URA7_YEAST	30	5.98125	1.05981	40 min	0 min
40 min / 0 min	P28319	P28319	-0.0226835	0.0226835	0.740811	40	0.121312	0.121312	P28319	CWP1	Cell wall protein CWP1	CWP1_YEAST	7	-1.56	0.9844	40 min	0 min
40 min / 0 min	P28320	P28320	-0.145829	0.145829	0.669211	10	-0.182065	0.182065	P28320	YJU2	Protein CWC16	CWC16_YEAST	2	-9.61402	0.90386	40 min	0 min
40 min / 0 min	P28321	P28321	-0.169564	0.169564	0.486864	50	-0.203638	0.203638	P28321	YJU3	Monoglyceride lipase	MGLL_YEAST	8	-11.0889	0.889111	40 min	0 min
40 min / 0 min	P28495	P28495	-0.0906481	0.0906481	0.583379	55	0.298809	0.298809	P28495	CAP1	F-actin-capping protein subunit alpha	CAPZA_YEAST	11	-6.08992	0.939101	40 min	0 min
40 min / 0 min	P28496	P28496	-0.00630926	0.00630926	0.793461	5	0.0180726	0.0180726	P28496	LAC1	Sphingosine N-acyltransferase LAC1	LAC1_YEAST	1	-0.43637	0.995636	40 min	0 min
40 min / 0 min	P28625	P28625	-0.0217349	0.0217349	0.755234	45	-0.0289354	0.0289354	P28625	YIM1	Protein YIM1	YIM1_YEAST	6	-1.49526	0.985047	40 min	0 min
40 min / 0 min	P28707	P28707	0.0130741	0.0130741	0.722893	35	0.119287	0.119287	P28707	SBA1	Co-chaperone protein SBA1	SBA1_YEAST	5	0.910348	1.0091	40 min	0 min
40 min / 0 min	P28708	P28708	0.120513	0.120513	0.686182	5	0.11127	0.11127	P28708	PRR1	Serine/threonine-protein kinase PRR1	PRR1_YEAST	1	8.71217	1.08712	40 min	0 min
40 min / 0 min	P28737	P28737	-0.210825	0.210825	0.622355	15	-0.418571	0.418571	P28737	MSP1	Protein MSP1	MSP1_YEAST	3	-13.5957	0.864043	40 min	0 min
40 min / 0 min	P28777	P28777	-0.0149148	0.0149148	0.630824	150	0.0765594	0.0765594	P28777	ARO2	Chorismate synthase	AROC_YEAST	20	-1.02849	0.989715	40 min	0 min
40 min / 0 min	P28778	P28778	-0.0399692	0.0399692	0.651139	10	-0.191609	0.191609	P28778	MRP17	37S ribosomal protein MRP17, mitochondrial	RT06_YEAST	2	-2.73243	0.972676	40 min	0 min
40 min / 0 min	P28789	P28789	-0.0854479	0.0854479	0.59132	55	0.24595	0.24595	P28789	HEM3	Porphobilinogen deaminase	HEM3_YEAST	10	-5.75081	0.942492	40 min	0 min
40 min / 0 min	P28791	P28791	-0.461742	0.461742	0.667864	5	-0.645211	0.645211	P28791	SEC20	Protein transport protein SEC20	SEC20_YEAST	1	-27.3891	0.726109	40 min	0 min
40 min / 0 min	P28795	P28795	-0.0368444	0.0368444	0.574158	10	-0.3933	0.3933	P28795	PEX3	Peroxisomal biogenesis factor 3	PEX3_YEAST	2	-2.52152	0.974785	40 min	0 min
40 min / 0 min	P28817	P28817	0.186199	0.186199	0.589796	20	0.182141	0.182141	P28817	EHD3	3-hydroxyisobutyryl-CoA hydrolase, mitochondrial	HIBCH_YEAST	4	13.7762	1.13776	40 min	0 min
40 min / 0 min	P28834	P28834	0.0154415	0.0154415	0.789954	100	0.0064647	0.0064647	P28834	IDH1	Isocitrate dehydrogenase [NAD] subunit 1, mitochondrial	IDH1_YEAST	17	1.07607	1.01076	40 min	0 min
40 min / 0 min	P29029	P29029	0.0928857	0.0928857	0.771079	10	0.0209589	0.0209589	P29029	CTS1	Endochitinase	CHIT_YEAST	2	6.65013	1.0665	40 min	0 min
40 min / 0 min	P29055	P29055	-0.0147763	0.0147763	0.563256	40	-0.287971	0.287971	P29055	SUA7	Transcription initiation factor IIB	TF2B_YEAST	7	-1.01899	0.98981	40 min	0 min
40 min / 0 min	P29056	P29056	0.321716	0.321716	0.551309	10	0.283576	0.283576	P29056	BRF1	Transcription factor IIIB 70 kDa subunit	TF3B_YEAST	2	24.9816	1.24982	40 min	0 min
40 min / 0 min	P29295	P29295	0.0816319	0.0816319	0.463457	40	0.228244	0.228244	P29295	HRR25	Casein kinase I homolog HRR25	HRR25_YEAST	7	5.82143	1.05821	40 min	0 min
40 min / 0 min	P29311	P29311	-0.0734896	0.0734896	0.709011	155	0.0780239	0.0780239	P29311	BMH1	Protein BMH1	BMH1_YEAST	19	-4.96635	0.950337	40 min	0 min
40 min / 0 min	P29366	P29366	-0.0667425	0.0667425	0.758538	15	0.0240499	0.0240499	P29366	BEM1	Bud emergence protein 1	BEM1_YEAST	3	-4.52086	0.954791	40 min	0 min
40 min / 0 min	P29453	P29453	0.0932461	0.0932461	0.441486	210	0.281656	0.281656	P29453	RPL8B	60S ribosomal protein L8-B	RL8B_YEAST	26	6.67678	1.06677	40 min	0 min
40 min / 0 min	P29465	P29465	0.00794976	0.00794976	0.73027	20	-0.0472953	0.0472953	P29465	CHS3	Chitin synthase 3	CHS3_YEAST	4	0.552557	1.00553	40 min	0 min
40 min / 0 min	P29468	P29468	-0.0318543	0.0318543	0.585012	30	-0.109597	0.109597	P29468	PAP1	Poly(A) polymerase	PAP_YEAST	6	-2.18377	0.978162	40 min	0 min
40 min / 0 min	P29469	P29469	-0.119053	0.119053	0.608497	65	0.186784	0.186784	P29469	MCM2	DNA replication licensing factor MCM2	MCM2_YEAST	12	-7.92084	0.920792	40 min	0 min
40 min / 0 min	P29478	P29478	-0.00321181	0.00321181	0.606629	40	-0.0599578	0.0599578	P29478	SEC65	Signal recognition particle subunit SEC65	SEC65_YEAST	8	-0.222378	0.997776	40 min	0 min
40 min / 0 min	P29496	P29496	0.0306527	0.0306527	0.63787	50	0.0981789	0.0981789	P29496	MCM5	Minichromosome maintenance protein 5	MCM5_YEAST	10	2.14742	1.02147	40 min	0 min
40 min / 0 min	P29509	P29509	0.0271299	0.0271299	0.794755	105	-0.00220515	0.00220515	P29509	TRR1	Thioredoxin reductase 1	TRXB1_YEAST	14	1.8983	1.01898	40 min	0 min
40 min / 0 min	P29539	P29539	0.420111	0.420111	0.563774	10	0.498522	0.498522	P29539	RIF1	Telomere length regulator protein RIF1	RIF1_YEAST	2	33.803	1.33803	40 min	0 min
40 min / 0 min	P29547	P29547	0.0220646	0.0220646	0.578481	100	-0.172829	0.172829	P29547	CAM1	Elongation factor 1-gamma 1	EF1G1_YEAST	14	1.54116	1.01541	40 min	0 min
40 min / 0 min	P29703	P29703	0.0493923	0.0493923	0.572014	45	0.108042	0.108042	P29703	RAM2	Protein farnesyltransferase/geranylgeranyltransferase type-1 subunit alpha	FNTA_YEAST	9	3.48289	1.03483	40 min	0 min
40 min / 0 min	P29704	P29704	0.0125821	0.0125821	0.582609	80	0.237837	0.237837	P29704	ERG9	Squalene synthase	FDFT_YEAST	12	0.875941	1.00876	40 min	0 min
40 min / 0 min	P29952	P29952	0.0306791	0.0306791	0.488473	145	0.158545	0.158545	P29952	PMI40	Mannose-6-phosphate isomerase	MPI_YEAST	21	2.14928	1.02149	40 min	0 min
40 min / 0 min	P30605	P30605	0.327943	0.327943	0.0111605	55	0.413454	0.413454	P30605	ITR1	Myo-inositol transporter 1	ITR1_YEAST	7	25.5222	1.25522	40 min	0 min
40 min / 0 min	P30619	P30619	-0.0467766	0.0467766	0.73819	50	-0.0438015	0.0438015	P30619	SEC1	Protein transport protein SEC1	SEC1_YEAST	10	-3.19031	0.968097	40 min	0 min
40 min / 0 min	P30624	P30624	0.0980456	0.0980456	0.722294	175	0.0510652	0.0510652	P30624	FAA1	Long-chain-fatty-acid--CoA ligase 1	LCF1_YEAST	25	7.03225	1.07032	40 min	0 min
40 min / 0 min	P30656	P30656	-0.169824	0.169824	0.694105	40	-0.063846	0.063846	P30656	PRE2	Proteasome subunit beta type-5	PSB5_YEAST	7	-11.1049	0.888951	40 min	0 min
40 min / 0 min	P30657	P30657	0.0449438	0.0449438	0.727764	30	0.0214752	0.0214752	P30657	PRE4	Proteasome subunit beta type-7	PSB7_YEAST	4	3.1643	1.03164	40 min	0 min
40 min / 0 min	P30665	P30665	0.0203314	0.0203314	0.588925	55	-0.163255	0.163255	P30665	MCM4	DNA replication licensing factor MCM4	MCM4_YEAST	11	1.41924	1.01419	40 min	0 min
40 min / 0 min	P30771	P30771	0.0925602	0.0925602	0.624797	90	0.0566388	0.0566388	P30771	NAM7	ATP-dependent helicase NAM7	NAM7_YEAST	18	6.62607	1.06626	40 min	0 min
40 min / 0 min	P30822	P30822	0.0658339	0.0658339	0.472979	145	0.116432	0.116432	P30822	CRM1	Exportin-1	XPO1_YEAST	26	4.66898	1.04669	40 min	0 min
40 min / 0 min	P30902	P30902	-0.12104	0.12104	0.500885	60	-0.110822	0.110822	P30902	ATP7	ATP synthase subunit d, mitochondrial	ATP7_YEAST	11	-8.04756	0.919524	40 min	0 min
40 min / 0 min	P31109	P31109	-0.109353	0.109353	0.556333	15	-0.451143	0.451143	P31109	SNC1	Synaptobrevin homolog 1	SNC1_YEAST	3	-7.29964	0.927004	40 min	0 min
40 min / 0 min	P31115	P31115	0.0275461	0.0275461	0.787341	5	0.0140475	0.0140475	P31115	DEG1	tRNA pseudouridine(38/39) synthase	PUS3_YEAST	1	1.92769	1.01928	40 min	0 min
40 min / 0 min	P31116	P31116	0.0280802	0.0280802	0.517418	125	0.0667918	0.0667918	P31116	HOM6	Homoserine dehydrogenase	DHOM_YEAST	20	1.96544	1.01965	40 min	0 min
40 min / 0 min	P31334	P31334	0.371333	0.371333	0.55947	20	0.906741	0.906741	P31334	MRPL9	54S ribosomal protein L9, mitochondrial	RM09_YEAST	4	29.3548	1.29355	40 min	0 min
40 min / 0 min	P31373	P31373	0.0182889	0.0182889	0.434254	85	0.107546	0.107546	P31373	CYS3	Cystathionine gamma-lyase	CYS3_YEAST	15	1.27576	1.01276	40 min	0 min
40 min / 0 min	P31374	P31374	0.102794	0.102794	0.65987	35	-0.349718	0.349718	P31374	PSK1	Serine/threonine-protein kinase PSK1	PSK1_YEAST	6	7.38513	1.07385	40 min	0 min
40 min / 0 min	P31377	P31377	0.0185498	0.0185498	0.792887	5	-0.00943925	0.00943925	P31377	SYN8	Syntaxin-8	STX8_YEAST	1	1.29408	1.01294	40 min	0 min
40 min / 0 min	P31378	P31378	-0.116713	0.116713	0.575182	5	-0.119696	0.119696	P31378	NTG1	Endonuclease III homolog 1	NTH1_YEAST	1	-7.77134	0.922287	40 min	0 min
40 min / 0 min	P31380	P31380	0.167117	0.167117	0.138033	50	0.284554	0.284554	P31380	FUN30	ATP-dependent helicase FUN30	FUN30_YEAST	10	12.2813	1.12281	40 min	0 min
40 min / 0 min	P31381	P31381	0.0447173	0.0447173	0.687522	5	0.0637622	0.0637622	P31381	FUN26	Nucleoside transporter FUN26	FUN26_YEAST	1	3.1481	1.03148	40 min	0 min
40 min / 0 min	P31382	P31382	0.0540021	0.0540021	0.507128	105	0.135714	0.135714	P31382	PMT2	Dolichyl-phosphate-mannose--protein mannosyltransferase 2	PMT2_YEAST	17	3.81408	1.03814	40 min	0 min
40 min / 0 min	P31383	P31383	0.0149813	0.0149813	0.561774	90	-0.170516	0.170516	P31383	TPD3	Protein phosphatase PP2A regulatory subunit A	2AAA_YEAST	16	1.04384	1.01044	40 min	0 min
40 min / 0 min	P31384	P31384	-0.0869349	0.0869349	0.791649	90	-0.0103899	0.0103899	P31384	CCR4	Glucose-repressible alcohol dehydrogenase transcriptional effector	CCR4_YEAST	15	-5.8479	0.941521	40 min	0 min
40 min / 0 min	P31385	P31385	0.0520213	0.0520213	0.766892	25	0.0443803	0.0443803	P31385	DEP1	Transcriptional regulatory protein DEP1	DEP1_YEAST	4	3.67164	1.03672	40 min	0 min
40 min / 0 min	P31412	P31412	0.0714524	0.0714524	0.709526	120	0.0455502	0.0455502	P31412	VMA5	V-type proton ATPase subunit C	VATC_YEAST	19	5.0774	1.05077	40 min	0 min
40 min / 0 min	P31539	P31539	0.134588	0.134588	0.26172	225	0.206754	0.206754	P31539	HSP104	Heat shock protein 104	HS104_YEAST	38	9.77789	1.09778	40 min	0 min
40 min / 0 min	P31688	P31688	0.0250582	0.0250582	0.589994	120	0.0654076	0.0654076	P31688	TPS2	Trehalose-phosphatase	TPS2_YEAST	22	1.75208	1.01752	40 min	0 min
40 min / 0 min	P31755	P31755	-0.148436	0.148436	0.521177	15	-0.33081	0.33081	P31755	OCH1	Initiation-specific alpha-1,6-mannosyltransferase	OCH1_YEAST	3	-9.77717	0.902228	40 min	0 min
40 min / 0 min	P31787	P31787	-0.0909417	0.0909417	0.574883	60	-0.0709517	0.0709517	P31787	ACB1	Acyl-CoA-binding protein	ACBP_YEAST	9	-6.10903	0.93891	40 min	0 min
40 min / 0 min	P32047	P32047	-0.204532	0.204532	0.314852	40	-0.485041	0.485041	P32047	MLF3	Protein MLF3	MLF3_YEAST	8	-13.218	0.86782	40 min	0 min
40 min / 0 min	P32048	P32048	0.327564	0.327564	0.631214	10	0.530349	0.530349	P32048	MSK1	Lysine--tRNA ligase, mitochondrial	SYKM_YEAST	2	25.4893	1.25489	40 min	0 min
40 min / 0 min	P32074	P32074	0.0511453	0.0511453	0.767183	165	0.00914129	0.00914129	P32074	SEC21	Coatomer subunit gamma	COPG_YEAST	29	3.60871	1.03609	40 min	0 min
40 min / 0 min	P32178	P32178	-0.115775	0.115775	0.701566	65	-0.0451709	0.0451709	P32178	ARO7	Chorismate mutase	CHMU_YEAST	12	-7.71138	0.922886	40 min	0 min
40 min / 0 min	P32179	P32179	-0.168695	0.168695	0.6452	90	-0.0419565	0.0419565	P32179	MET22	3'(2'),5'-bisphosphate nucleotidase	MET22_YEAST	16	-11.0353	0.889647	40 min	0 min
40 min / 0 min	P32191	P32191	0.153947	0.153947	0.517418	60	0.392042	0.392042	P32191	GUT2	Glycerol-3-phosphate dehydrogenase, mitochondrial	GPDM_YEAST	12	11.2609	1.11261	40 min	0 min
40 min / 0 min	P32259	P32259	-0.0875069	0.0875069	0.595261	25	-0.153695	0.153695	P32259	SIN4	Mediator of RNA polymerase II transcription subunit 16	MED16_YEAST	5	-5.88523	0.941148	40 min	0 min
40 min / 0 min	P32263	P32263	0.0236923	0.0236923	0.747723	55	0.030107	0.030107	P32263	PRO3	Pyrroline-5-carboxylate reductase	P5CR_YEAST	9	1.65578	1.01656	40 min	0 min
40 min / 0 min	P32264	P32264	0.108003	0.108003	0.749454	90	0.0247712	0.0247712	P32264	PRO1	Glutamate 5-kinase	PROB_YEAST	16	7.77356	1.07774	40 min	0 min
40 min / 0 min	P32266	P32266	0.125923	0.125923	0.730367	40	-0.0551723	0.0551723	P32266	MGM1	Dynamin-like GTPase MGM1, mitochondrial	MGM1_YEAST	7	9.12058	1.09121	40 min	0 min
40 min / 0 min	P32288	P32288	0.131672	0.131672	0.403165	120	0.24073	0.24073	P32288	GLN1	Glutamine synthetase	GLNA_YEAST	16	9.55624	1.09556	40 min	0 min
40 min / 0 min	P32316	P32316	0.0897808	0.0897808	0.574291	70	0.254042	0.254042	P32316	ACH1	Acetyl-CoA hydrolase	ACH1_YEAST	13	6.42085	1.06421	40 min	0 min
40 min / 0 min	P32317	P32317	0.0132377	0.0132377	0.786802	40	0.022147	0.022147	P32317	AFG1	Protein AFG1	AFG1_YEAST	8	0.921787	1.00922	40 min	0 min
40 min / 0 min	P32319	P32319	0.0190722	0.0190722	0.586456	170	0.0599205	0.0599205	P32319	PEP1	Vacuolar protein sorting/targeting protein VPS10	VPS10_YEAST	32	1.33076	1.01331	40 min	0 min
40 min / 0 min	P32324	P32324	0.139008	0.139008	0.0174245	495	0.146903	0.146903	P32324	EFT1	Elongation factor 2	EF2_YEAST	57	10.1148	1.10115	40 min	0 min
40 min / 0 min	P32327	P32327	0.132688	0.132688	0.757717	345	-0.0157878	0.0157878	P32327	PYC2	Pyruvate carboxylase 2	PYC2_YEAST	49	9.63343	1.09633	40 min	0 min
40 min / 0 min	P32328	P32328	-0.330084	0.330084	0.507128	10	-0.265446	0.265446	P32328	DBF20	Serine/threonine-protein kinase DBF20	DBF20_YEAST	2	-20.451	0.79549	40 min	0 min
40 min / 0 min	P32329	P32329	-0.288265	0.288265	0.676863	10	-0.302594	0.302594	P32329	YPS1	Aspartic proteinase 3	YPS1_YEAST	2	-18.1114	0.818886	40 min	0 min
40 min / 0 min	P32331	P32331	-0.0445175	0.0445175	0.382806	40	-0.184454	0.184454	P32331	YMC1	Carrier protein YMC1, mitochondrial	YMC1_YEAST	8	-3.0386	0.969614	40 min	0 min
40 min / 0 min	P32332	P32332	-0.0878997	0.0878997	0.0749159	70	-0.246175	0.246175	P32332	OAC1	Mitochondrial oxaloacetate transport protein	OAC1_YEAST	13	-5.91085	0.940892	40 min	0 min
40 min / 0 min	P32333	P32333	-0.0112325	0.0112325	0.73819	55	0.0670546	0.0670546	P32333	MOT1	TATA-binding protein-associated factor MOT1	MOT1_YEAST	11	-0.775552	0.992244	40 min	0 min
40 min / 0 min	P32335	P32335	0.0629125	0.0629125	0.233574	70	0.509284	0.509284	P32335	MSS51	Protein MSS51, mitochondrial	MSS51_YEAST	13	4.45724	1.04457	40 min	0 min
40 min / 0 min	P32336	P32336	-0.155273	0.155273	0.681915	5	-0.205529	0.205529	P32336	NUD1	Protein NUD1	NUD1_YEAST	1	-10.2038	0.897962	40 min	0 min
40 min / 0 min	P32337	P32337	0.155588	0.155588	0.771875	90	0.0101714	0.0101714	P32337	PSE1	Importin subunit beta-3	IMB3_YEAST	17	11.3875	1.11388	40 min	0 min
40 min / 0 min	P32338	P32338	-0.338795	0.338795	0.772045	10	-0.0599416	0.0599416	P32338	RME1	Zinc finger protein RME1	RME1_YEAST	2	-20.9299	0.790701	40 min	0 min
40 min / 0 min	P32340	P32340	0.165901	0.165901	0.637761	45	0.0890126	0.0890126	P32340	NDI1	Rotenone-insensitive NADH-ubiquinone oxidoreductase, mitochondrial	NDI1_YEAST	8	12.1866	1.12187	40 min	0 min
40 min / 0 min	P32341	P32341	-0.0517175	0.0517175	0.736844	5	-0.084964	0.084964	P32341	VPH2	Vacuolar ATPase assembly integral membrane protein VPH2	VPH2_YEAST	1	-3.52129	0.964787	40 min	0 min
40 min / 0 min	P32342	P32342	0.0943225	0.0943225	0.600904	10	0.0864869	0.0864869	P32342	SRP21	Signal recognition particle subunit SRP21	SRP21_YEAST	2	6.7564	1.06756	40 min	0 min
40 min / 0 min	P32345	P32345	0.187956	0.187956	0.481061	20	0.342367	0.342367	P32345	PPH3	Serine/threonine-protein phosphatase 4 catalytic subunit	PP4C_YEAST	4	13.9149	1.13915	40 min	0 min
40 min / 0 min	P32347	P32347	-0.0444854	0.0444854	0.600437	40	0.131903	0.131903	P32347	HEM12	Uroporphyrinogen decarboxylase	DCUP_YEAST	7	-3.03644	0.969636	40 min	0 min
40 min / 0 min	P32349	P32349	-0.0623446	0.0623446	0.55047	55	-0.146053	0.146053	P32349	RPC82	DNA-directed RNA polymerase III subunit RPC3	RPC3_YEAST	10	-4.22936	0.957706	40 min	0 min
40 min / 0 min	P32351	P32351	-0.097944	0.097944	0.763498	25	0.157064	0.157064	P32351	IMP2'	Sugar utilization regulatory protein IMP2	IMPX_YEAST	4	-6.56364	0.934364	40 min	0 min
40 min / 0 min	P32352	P32352	0.0149671	0.0149671	0.796813	30	0.00271931	0.00271931	P32352	ERG2	C-8 sterol isomerase	ERG2_YEAST	4	1.04284	1.01043	40 min	0 min
40 min / 0 min	P32353	P32353	-0.0466692	0.0466692	0.633024	20	-0.301645	0.301645	P32353	ERG3	C-5 sterol desaturase	ERG3_YEAST	3	-3.1831	0.968169	40 min	0 min
40 min / 0 min	P32356	P32356	-0.052352	0.052352	0.635928	100	-0.0386697	0.0386697	P32356	NTH1	Neutral trehalase	TREA_YEAST	19	-3.56371	0.964363	40 min	0 min
40 min / 0 min	P32361	P32361	-0.117376	0.117376	0.701465	15	-0.217553	0.217553	P32361	IRE1	Serine/threonine-protein kinase/endoribonuclease IRE1	IRE1_YEAST	3	-7.81371	0.921863	40 min	0 min
40 min / 0 min	P32364	P32364	-0.0158842	0.0158842	0.664877	40	0.195113	0.195113	P32364	SMY1	Kinesin-related protein SMY1	SMY1_YEAST	8	-1.09497	0.98905	40 min	0 min
40 min / 0 min	P32366	P32366	-0.0272936	0.0272936	0.670805	60	0.050751	0.050751	P32366	VMA6	V-type proton ATPase subunit d	VA0D_YEAST	9	-1.87407	0.981259	40 min	0 min
40 min / 0 min	P32367	P32367	0.353409	0.353409	0.657717	25	0.136683	0.136683	P32367	TFC1	Transcription factor tau 95 kDa subunit	TFC1_YEAST	5	27.7576	1.27758	40 min	0 min
40 min / 0 min	P32368	P32368	-0.00488863	0.00488863	0.122115	165	0.160682	0.160682	P32368	SAC1	Phosphoinositide phosphatase SAC1	SAC1_YEAST	25	-0.338281	0.996617	40 min	0 min
40 min / 0 min	P32377	P32377	-0.116891	0.116891	0.569247	65	-0.0688198	0.0688198	P32377	MVD1	Diphosphomevalonate decarboxylase	MVD1_YEAST	12	-7.78269	0.922173	40 min	0 min
40 min / 0 min	P32378	P32378	0.208668	0.208668	0.681134	15	0.144325	0.144325	P32378	COQ2	4-hydroxybenzoate polyprenyltransferase, mitochondrial	COQ2_YEAST	3	15.562	1.15562	40 min	0 min
40 min / 0 min	P32379	P32379	-0.171209	0.171209	0.502644	80	-0.269219	0.269219	P32379	PUP2	Proteasome subunit alpha type-5	PSA5_YEAST	13	-11.1902	0.888098	40 min	0 min
40 min / 0 min	P32380	P32380	-0.0291867	0.0291867	0.503453	35	-0.314389	0.314389	P32380	SPC110	Spindle pole body component 110	SP110_YEAST	7	-2.00274	0.979973	40 min	0 min
40 min / 0 min	P32381	P32381	0.0647131	0.0647131	0.448813	90	-0.201117	0.201117	P32381	ARP2	Actin-related protein 2	ARP2_YEAST	14	4.58769	1.04588	40 min	0 min
40 min / 0 min	P32386	P32386	0.0337456	0.0337456	0.648524	200	-0.0251299	0.0251299	P32386	YBT1	ATP-dependent bile acid permease	YBT1_YEAST	38	2.36664	1.02367	40 min	0 min
40 min / 0 min	P32387	P32387	-0.114412	0.114412	0.585414	15	-0.347705	0.347705	P32387	MRP20	54S ribosomal protein L41, mitochondrial	RM41_YEAST	3	-7.62412	0.923759	40 min	0 min
40 min / 0 min	P32388	P32388	0.253326	0.253326	0.681114	15	0.421163	0.421163	P32388	MRP49	54S ribosomal protein MRP49, mitochondrial	RM49_YEAST	2	19.1952	1.19195	40 min	0 min
40 min / 0 min	P32389	P32389	-0.0584468	0.0584468	0.729929	10	-0.0761722	0.0761722	P32389	MET4	Transcriptional activator of sulfur metabolism MET4	MET4_YEAST	2	-3.97026	0.960297	40 min	0 min
40 min / 0 min	P32419	P32419	0.0265901	0.0265901	0.70747	110	0.0648592	0.0648592	P32419	MDH3	Malate dehydrogenase, peroxisomal	MDHP_YEAST	17	1.86017	1.0186	40 min	0 min
40 min / 0 min	P32432	P32432	-0.236604	0.236604	0.582073	5	-0.227679	0.227679	P32432	SFP1	Transcription factor SFP1	SFP1_YEAST	1	-15.1259	0.848741	40 min	0 min
40 min / 0 min	P32445	P32445	-0.0436851	0.0436851	0.596315	30	-0.0912031	0.0912031	P32445	RIM1	Single-stranded DNA-binding protein RIM1, mitochondrial	RIM1_YEAST	5	-2.98263	0.970174	40 min	0 min
40 min / 0 min	P32447	P32447	-0.16212	0.16212	0.59568	30	-0.140033	0.140033	P32447	ASF1	Histone chaperone ASF1	ASF1_YEAST	6	-10.6289	0.893711	40 min	0 min
40 min / 0 min	P32449	P32449	-0.020194	0.020194	0.779839	150	0.0162892	0.0162892	P32449	ARO4	Phospho-2-dehydro-3-deoxyheptonate aldolase, tyrosine-inhibited	AROG_YEAST	19	-1.38999	0.9861	40 min	0 min
40 min / 0 min	P32451	P32451	0.308341	0.308341	0.73027	40	-0.102685	0.102685	P32451	BIO2	Biotin synthase, mitochondrial	BIOB_YEAST	6	23.8283	1.23828	40 min	0 min
40 min / 0 min	P32452	P32452	0.0377797	0.0377797	0.754551	40	-0.0832327	0.0832327	P32452	PHA2	Putative prephenate dehydratase	PHA2_YEAST	8	2.65328	1.02653	40 min	0 min
40 min / 0 min	P32453	P32453	0.0288926	0.0288926	0.700272	20	0.0346132	0.0346132	P32453	ATP11	Protein ATP11, mitochondrial	ATP11_YEAST	5	2.02287	1.02023	40 min	0 min
40 min / 0 min	P32454	P32454	0.0674178	0.0674178	0.563715	265	0.0451926	0.0451926	P32454	APE2	Aminopeptidase 2, mitochondrial	APE2_YEAST	41	4.78395	1.04784	40 min	0 min
40 min / 0 min	P32457	P32457	0.0136627	0.0136627	0.719382	130	0.0231334	0.0231334	P32457	CDC3	Cell division control protein 3	CDC3_YEAST	22	0.951525	1.00952	40 min	0 min
40 min / 0 min	P32458	P32458	0.0792576	0.0792576	0.499546	55	0.233222	0.233222	P32458	CDC11	Cell division control protein 11	CDC11_YEAST	9	5.64742	1.05647	40 min	0 min
40 min / 0 min	P32461	P32461	0.0325761	0.0325761	0.563715	30	0.299119	0.299119	P32461	DPH2	Diphthamide biosynthesis protein 2	DPH2_YEAST	5	2.28369	1.02284	40 min	0 min
40 min / 0 min	P32462	P32462	-0.120356	0.120356	0.725743	20	-0.0486488	0.0486488	P32462	ERG24	Delta(14)-sterol reductase	ERG24_YEAST	4	-8.00396	0.91996	40 min	0 min
40 min / 0 min	P32463	P32463	-0.189067	0.189067	0.779036	25	-0.0160751	0.0160751	P32463	ACP1	Acyl carrier protein, mitochondrial	ACPM_YEAST	3	-12.2827	0.877173	40 min	0 min
40 min / 0 min	P32464	P32464	0.614566	0.614566	0.617492	10	0.45459	0.45459	P32464	HYM1	Protein HYM1	HYM1_YEAST	2	53.1097	1.5311	40 min	0 min
40 min / 0 min	P32465	P32465	-0.131537	0.131537	0.784605	60	-0.0170124	0.0170124	P32465	HXT1	Low-affinity glucose transporter HXT1	HXT1_YEAST	9	-8.71413	0.912859	40 min	0 min
40 min / 0 min	P32466	P32466	-0.0198117	0.0198117	0.779365	50	-0.0169659	0.0169659	P32466	HXT3	Low-affinity glucose transporter HXT3	HXT3_YEAST	9	-1.36386	0.986361	40 min	0 min
40 min / 0 min	P32468	P32468	-0.0443909	0.0443909	0.665382	100	0.0626817	0.0626817	P32468	CDC12	Cell division control protein 12	CDC12_YEAST	16	-3.03009	0.969699	40 min	0 min
40 min / 0 min	P32469	P32469	-0.0809597	0.0809597	0.661497	20	0.224163	0.224163	P32469	DPH5	Diphthine methyl ester synthase	DPH5_YEAST	4	-5.45715	0.945429	40 min	0 min
40 min / 0 min	P32471	P32471	0.0757463	0.0757463	0.667864	70	-0.184431	0.184431	P32471	EFB1	Elongation factor 1-beta	EF1B_YEAST	10	5.39061	1.05391	40 min	0 min
40 min / 0 min	P32472	P32472	-0.052954	0.052954	0.509876	45	-0.249504	0.249504	P32472	FPR2	Peptidyl-prolyl cis-trans isomerase FPR2	FKBP2_YEAST	7	-3.60395	0.963961	40 min	0 min
40 min / 0 min	P32473	P32473	0.0561616	0.0561616	0.350013	75	0.146715	0.146715	P32473	PDB1	Pyruvate dehydrogenase E1 component subunit beta, mitochondrial	ODPB_YEAST	13	3.96959	1.0397	40 min	0 min
40 min / 0 min	P32474	P32474	-0.102759	0.102759	0.790011	35	-0.00507681	0.00507681	P32474	EUG1	Protein disulfide-isomerase EUG1	EUG1_YEAST	7	-6.87495	0.931251	40 min	0 min
40 min / 0 min	P32476	P32476	0.17746	0.17746	0.341075	90	0.20598	0.20598	P32476	ERG1	Squalene monooxygenase	ERG1_YEAST	13	13.0891	1.13089	40 min	0 min
40 min / 0 min	P32477	P32477	-0.110135	0.110135	0.535949	50	-0.112938	0.112938	P32477	GSH1	Glutamate--cysteine ligase	GSH1_YEAST	10	-7.34986	0.926501	40 min	0 min
40 min / 0 min	P32478	P32478	0.0130354	0.0130354	0.551302	30	-0.150531	0.150531	P32478	HSP150	Cell wall mannoprotein HSP150	HS150_YEAST	5	0.90764	1.00908	40 min	0 min
40 min / 0 min	P32480	P32480	0.504861	0.504861	0.62857	10	0.568959	0.568959	P32480	HIR2	Protein HIR2	HIR2_YEAST	2	41.8987	1.41899	40 min	0 min
40 min / 0 min	P32481	P32481	0.0885125	0.0885125	0.599421	150	0.0963179	0.0963179	P32481	GCD11	Eukaryotic translation initiation factor 2 subunit gamma	IF2G_YEAST	23	6.32733	1.06327	40 min	0 min
40 min / 0 min	P32485	P32485	0.100403	0.100403	0.796736	90	-0.00587795	0.00587795	P32485	HOG1	Mitogen-activated protein kinase HOG1	HOG1_YEAST	13	7.20731	1.07207	40 min	0 min
40 min / 0 min	P32486	P32486	-0.0979159	0.0979159	0.625571	80	-0.0400077	0.0400077	P32486	KRE6	Beta-glucan synthesis-associated protein KRE6	KRE6_YEAST	14	-6.56182	0.934382	40 min	0 min
40 min / 0 min	P32487	P32487	-0.28085	0.28085	0.12171	25	-0.260299	0.260299	P32487	LYP1	Lysine-specific permease	LYP1_YEAST	5	-17.6894	0.823106	40 min	0 min
40 min / 0 min	P32491	P32491	0.0689136	0.0689136	0.688622	10	0.33354	0.33354	P32491	MKK2	MAP kinase kinase MKK2/SSP33	MKK2_YEAST	2	4.89265	1.04893	40 min	0 min
40 min / 0 min	P32492	P32492	-0.0610027	0.0610027	0.595881	55	0.149237	0.149237	P32492	MYO4	Myosin-4	MYO4_YEAST	11	-4.14024	0.958598	40 min	0 min
40 min / 0 min	P32494	P32494	0.133322	0.133322	0.514886	20	0.256596	0.256596	P32494	NGG1	Chromatin-remodeling complexes subunit NGG1	NGG1_YEAST	4	9.6816	1.09682	40 min	0 min
40 min / 0 min	P32495	P32495	0.20139	0.20139	0.254469	50	0.388178	0.388178	P32495	NHP2	H/ACA ribonucleoprotein complex subunit 2	NHP2_YEAST	6	14.9805	1.14981	40 min	0 min
40 min / 0 min	P32496	P32496	-0.0317587	0.0317587	0.625296	95	-0.0836497	0.0836497	P32496	RPN12	26S proteasome regulatory subunit RPN12	RPN12_YEAST	15	-2.17729	0.978227	40 min	0 min
40 min / 0 min	P32497	P32497	0.100515	0.100515	0.0722581	190	0.185578	0.185578	P32497	NIP1	Eukaryotic translation initiation factor 3 subunit C	EIF3C_YEAST	30	7.21561	1.07216	40 min	0 min
40 min / 0 min	P32499	P32499	-0.0369838	0.0369838	0.556976	140	-0.133696	0.133696	P32499	NUP2	Nucleoporin NUP2	NUP2_YEAST	25	-2.53094	0.974691	40 min	0 min
40 min / 0 min	P32500	P32500	0.0180555	0.0180555	0.771795	25	-0.0146205	0.0146205	P32500	NDC1	Nucleoporin NDC1	NDC1_YEAST	5	1.25938	1.01259	40 min	0 min
40 min / 0 min	P32501	P32501	0.0239642	0.0239642	0.61306	75	0.0479167	0.0479167	P32501	GCD6	Translation initiation factor eIF-2B subunit epsilon	EI2BE_YEAST	14	1.67494	1.01675	40 min	0 min
40 min / 0 min	P32502	P32502	-0.00398239	0.00398239	0.799691	35	-0.000924817	0.000924817	P32502	GCD7	Translation initiation factor eIF-2B subunit beta	EI2BB_YEAST	7	-0.275657	0.997243	40 min	0 min
40 min / 0 min	P32504	P32504	-0.144588	0.144588	0.631214	10	-0.219959	0.219959	P32504	CBF2	Centromere DNA-binding protein complex CBF3 subunit A	CBF3A_YEAST	2	-9.53626	0.904637	40 min	0 min
40 min / 0 min	P32505	P32505	-0.0406936	0.0406936	0.552273	40	-0.114738	0.114738	P32505	NAB2	Nuclear polyadenylated RNA-binding protein NAB2	NAB2_YEAST	7	-2.78126	0.972187	40 min	0 min
40 min / 0 min	P32521	P32521	0.108315	0.108315	0.790217	155	-0.00971079	0.00971079	P32521	PAN1	Actin cytoskeleton-regulatory complex protein PAN1	PAN1_YEAST	26	7.79688	1.07797	40 min	0 min
40 min / 0 min	P32523	P32523	-0.0218181	0.0218181	0.742133	50	-0.0318184	0.0318184	P32523	PRP19	Pre-mRNA-processing factor 19	PRP19_YEAST	10	-1.50093	0.984991	40 min	0 min
40 min / 0 min	P32524	P32524	-0.440813	0.440813	0.546189	5	-0.540163	0.540163	P32524	PRP21	Pre-mRNA-splicing factor PRP21	PRP21_YEAST	1	-26.3281	0.736719	40 min	0 min
40 min / 0 min	P32525	P32525	0.223542	0.223542	0.517418	20	0.286693	0.286693	P32525	ECM25	Protein ECM25	ECM25_YEAST	4	16.7597	1.1676	40 min	0 min
40 min / 0 min	P32527	P32527	-0.0309051	0.0309051	0.724962	140	-0.0509327	0.0509327	P32527	ZUO1	Zuotin	ZUO1_YEAST	23	-2.1194	0.978806	40 min	0 min
40 min / 0 min	P32528	P32528	0.0214332	0.0214332	0.563715	100	0.154087	0.154087	P32528	DUR1,2	Urea amidolyase	DUR1_YEAST	19	1.49673	1.01497	40 min	0 min
40 min / 0 min	P32529	P32529	-0.138491	0.138491	0.562417	10	-0.119017	0.119017	P32529	RPA12	DNA-directed RNA polymerase I subunit RPA12	RPA12_YEAST	2	-9.15312	0.908469	40 min	0 min
40 min / 0 min	P32558	P32558	0.0466441	0.0466441	0.216943	215	0.163918	0.163918	P32558	SPT16	FACT complex subunit SPT16	SPT16_YEAST	39	3.28595	1.03286	40 min	0 min
40 min / 0 min	P32561	P32561	-0.117444	0.117444	0.62327	40	-0.181859	0.181859	P32561	RPD3	Histone deacetylase RPD3	RPD3_YEAST	7	-7.81805	0.921819	40 min	0 min
40 min / 0 min	P32563	P32563	0.0910602	0.0910602	0.758952	145	-0.0296802	0.0296802	P32563	VPH1	V-type proton ATPase subunit a, vacuolar isoform	VPH1_YEAST	23	6.51527	1.06515	40 min	0 min
40 min / 0 min	P32564	P32564	-0.288746	0.288746	0.508378	5	-0.290856	0.290856	P32564	SCM4	Protein SCM4	SCM4_YEAST	1	-18.1387	0.818613	40 min	0 min
40 min / 0 min	P32565	P32565	0.165563	0.165563	0.451099	190	0.173606	0.173606	P32565	RPN2	26S proteasome regulatory subunit RPN2	RPN2_YEAST	34	12.1604	1.1216	40 min	0 min
40 min / 0 min	P32566	P32566	0.0389852	0.0389852	0.756738	55	-0.0700867	0.0700867	P32566	SMI1	Cell wall assembly regulator SMI1	SMI1_YEAST	10	2.73909	1.02739	40 min	0 min
40 min / 0 min	P32567	P32567	0.064387	0.064387	0.576553	20	0.23299	0.23299	P32567	PAH1	Phosphatidic acid phosphohydrolase 1	PAH1_YEAST	4	4.56405	1.04564	40 min	0 min
40 min / 0 min	P32568	P32568	-0.117087	0.117087	0.546434	100	-0.196928	0.196928	P32568	SNQ2	Protein SNQ2	SNQ2_YEAST	20	-7.79525	0.922047	40 min	0 min
40 min / 0 min	P32570	P32570	-0.109048	0.109048	0.547105	10	-0.146571	0.146571	P32570	SRB6	Mediator of RNA polymerase II transcription subunit 22	MED22_YEAST	2	-7.28001	0.9272	40 min	0 min
40 min / 0 min	P32578	P32578	-0.185285	0.185285	0.754551	10	-0.110967	0.110967	P32578	SIP1	SNF1 protein kinase subunit beta-1	SIP1_YEAST	2	-12.0525	0.879475	40 min	0 min
40 min / 0 min	P32579	P32579	-0.159381	0.159381	0.786105	25	-0.00967025	0.00967025	P32579	SUA5	Threonylcarbamoyl-AMP synthase	SUA5_YEAST	5	-10.4591	0.895409	40 min	0 min
40 min / 0 min	P32582	P32582	0.0942976	0.0942976	0.399219	260	0.116185	0.116185	P32582	CYS4	Cystathionine beta-synthase	CBS_YEAST	39	6.75455	1.06755	40 min	0 min
40 min / 0 min	P32583	P32583	0.0205816	0.0205816	0.678518	20	0.0856217	0.0856217	P32583	SRP40	Suppressor protein SRP40	SRP40_YEAST	4	1.43683	1.01437	40 min	0 min
40 min / 0 min	P32585	P32585	0.112515	0.112515	0.606437	5	0.131227	0.131227	P32585	SRB5	Mediator of RNA polymerase II transcription subunit 18	MED18_YEAST	1	8.1111	1.08111	40 min	0 min
40 min / 0 min	P32588	P32588	-0.0533466	0.0533466	0.538687	45	0.37506	0.37506	P32588	PUB1	Nuclear and cytoplasmic polyadenylated RNA-binding protein PUB1	PUB1_YEAST	8	-3.63017	0.963698	40 min	0 min
40 min / 0 min	P32589	P32589	0.093127	0.093127	0.741742	405	0.021351	0.021351	P32589	SSE1	Heat shock protein homolog SSE1	HSP7F_YEAST	48	6.66797	1.06668	40 min	0 min
40 min / 0 min	P32590	P32590	-0.0125315	0.0125315	0.59573	65	-0.103382	0.103382	P32590	SSE2	Heat shock protein homolog SSE2	HSP79_YEAST	13	-0.864858	0.991351	40 min	0 min
40 min / 0 min	P32591	P32591	0.0945918	0.0945918	0.590289	75	0.0628256	0.0628256	P32591	SWI3	SWI/SNF complex subunit SWI3	SWI3_YEAST	15	6.77632	1.06776	40 min	0 min
40 min / 0 min	P32597	P32597	0.145478	0.145478	0.618277	95	0.164469	0.164469	P32597	STH1	Nuclear protein STH1/NPS1	STH1_YEAST	18	10.6097	1.1061	40 min	0 min
40 min / 0 min	P32598	P32598	0.0504354	0.0504354	0.701059	100	-0.042879	0.042879	P32598	GLC7	Serine/threonine-protein phosphatase PP1-2	PP12_YEAST	11	3.55774	1.03558	40 min	0 min
40 min / 0 min	P32599	P32599	0.101906	0.101906	0.787576	165	-0.00792305	0.00792305	P32599	SAC6	Fimbrin	FIMB_YEAST	25	7.31904	1.07319	40 min	0 min
40 min / 0 min	P32600	P32600	0.34609	0.34609	0.52826	20	0.601409	0.601409	P32600	TOR2	Serine/threonine-protein kinase TOR2	TOR2_YEAST	4	27.1111	1.27111	40 min	0 min
40 min / 0 min	P32602	P32602	0.00622278	0.00622278	0.694311	95	0.0356728	0.0356728	P32602	SEC17	Alpha-soluble NSF attachment protein	SEC17_YEAST	16	0.432262	1.00432	40 min	0 min
40 min / 0 min	P32604	P32604	-0.103428	0.103428	0.646312	15	-0.0813964	0.0813964	P32604	FBP26	Fructose-2,6-bisphosphatase	F26_YEAST	3	-6.91816	0.930818	40 min	0 min
40 min / 0 min	P32607	P32607	-0.0224463	0.0224463	0.773718	5	-0.0359657	0.0359657	P32607	RTG1	Retrograde regulation protein 1	RTG1_YEAST	1	-1.54382	0.984562	40 min	0 min
40 min / 0 min	P32608	P32608	0.118256	0.118256	0.595881	105	-0.142038	0.142038	P32608	RTG2	Retrograde regulation protein 2	RTG2_YEAST	21	8.54219	1.08542	40 min	0 min
40 min / 0 min	P32610	P32610	0.0627328	0.0627328	0.604512	25	0.0680056	0.0680056	P32610	VMA8	V-type proton ATPase subunit D	VATD_YEAST	5	4.44423	1.04444	40 min	0 min
40 min / 0 min	P32611	P32611	0.063901	0.063901	0.537638	20	0.137158	0.137158	P32611	RML2	54S ribosomal protein RML2, mitochondrial	RML2_YEAST	4	4.52884	1.04529	40 min	0 min
40 min / 0 min	P32614	P32614	0.0345466	0.0345466	0.733766	190	-0.0312155	0.0312155	P32614	FRD1	Fumarate reductase 1	FRDS_YEAST	28	2.42349	1.02423	40 min	0 min
40 min / 0 min	P32618	P32618	0.0769806	0.0769806	0.563715	10	0.0801318	0.0801318	P32618	YEL043W	Uncharacterized protein YEL043W	YEF3_YEAST	2	5.48081	1.05481	40 min	0 min
40 min / 0 min	P32621	P32621	0.039391	0.039391	0.565646	80	-0.176777	0.176777	P32621	GDA1	Guanosine-diphosphatase	GDA1_YEAST	12	2.76799	1.02768	40 min	0 min
40 min / 0 min	P32623	P32623	-0.0430701	0.0430701	0.610462	30	0.427367	0.427367	P32623	UTR2	Probable glycosidase CRH2	CRH2_YEAST	3	-2.94127	0.970587	40 min	0 min
40 min / 0 min	P32626	P32626	-0.147069	0.147069	0.569659	40	-0.174969	0.174969	P32626	UTR4	Enolase-phosphatase E1	ENOPH_YEAST	8	-9.69167	0.903083	40 min	0 min
40 min / 0 min	P32628	P32628	0.0232089	0.0232089	0.684995	85	0.0781219	0.0781219	P32628	RAD23	UV excision repair protein RAD23	RAD23_YEAST	12	1.62173	1.01622	40 min	0 min
40 min / 0 min	P32629	P32629	0.102842	0.102842	0.758717	40	0.0371025	0.0371025	P32629	ANP1	Mannan polymerase II complex ANP1 subunit	ANP1_YEAST	7	7.38868	1.07389	40 min	0 min
40 min / 0 min	P32639	P32639	-0.0313525	0.0313525	0.778331	50	-0.0314164	0.0314164	P32639	BRR2	Pre-mRNA-splicing helicase BRR2	BRR2_YEAST	10	-2.14975	0.978503	40 min	0 min
40 min / 0 min	P32641	P32641	1.04932	1.04932	0.572948	5	0.853747	0.853747	P32641	RAD24	Checkpoint protein RAD24	RAD24_YEAST	1	106.955	2.06955	40 min	0 min
40 min / 0 min	P32643	P32643	-0.21592	0.21592	0.472243	65	-0.137256	0.137256	P32643	TMT1	Trans-aconitate 3-methyltransferase	TMT1_YEAST	11	-13.9003	0.860997	40 min	0 min
40 min / 0 min	P32644	P32644	0.322057	0.322057	0.578481	10	0.310664	0.310664	P32644	ECM32	Putative ATP-dependent RNA helicase ECM32	ECM32_YEAST	2	25.0111	1.25011	40 min	0 min
40 min / 0 min	P32656	P32656	-0.000461103	0.000461103	0.594773	20	0.345459	0.345459	P32656	GCG1	Glutathione-specific gamma-glutamylcyclotransferase	CHAC_YEAST	3	-0.0319561	0.99968	40 min	0 min
40 min / 0 min	P32657	P32657	0.0527622	0.0527622	0.572764	110	0.164428	0.164428	P32657	CHD1	Chromo domain-containing protein 1	CHD1_YEAST	21	3.7249	1.03725	40 min	0 min
40 min / 0 min	P32660	P32660	-0.00688133	0.00688133	0.567702	85	-0.221292	0.221292	P32660	DNF1	Phospholipid-transporting ATPase DNF1	ATC5_YEAST	14	-0.475841	0.995242	40 min	0 min
40 min / 0 min	P32767	P32767	-0.106487	0.106487	0.611714	25	-0.129935	0.129935	P32767	KAP122	Importin beta-like protein KAP122	KA122_YEAST	5	-7.11531	0.928847	40 min	0 min
40 min / 0 min	P32769	P32769	-0.0571416	0.0571416	0.67053	55	-0.138551	0.138551	P32769	HBS1	Elongation factor 1 alpha-like protein	HBS1_YEAST	11	-3.88334	0.961167	40 min	0 min
40 min / 0 min	P32770	P32770	0.141916	0.141916	0.503453	25	0.167262	0.167262	P32770	NRP1	Asparagine-rich protein	NRP1_YEAST	4	10.3369	1.10337	40 min	0 min
40 min / 0 min	P32771	P32771	0.0498913	0.0498913	0.475345	55	0.13699	0.13699	P32771	SFA1	S-(hydroxymethyl)glutathione dehydrogenase	FADH_YEAST	10	3.51869	1.03519	40 min	0 min
40 min / 0 min	P32773	P32773	-0.157775	0.157775	0.618293	5	-0.135813	0.135813	P32773	TOA1	Transcription initiation factor IIA large subunit	TOA1_YEAST	1	-10.3594	0.896406	40 min	0 min
40 min / 0 min	P32774	P32774	-0.0996477	0.0996477	0.420073	25	-0.294709	0.294709	P32774	TOA2	Transcription initiation factor IIA subunit 2	T2AG_YEAST	4	-6.67391	0.933261	40 min	0 min
40 min / 0 min	P32775	P32775	-0.0153588	0.0153588	0.752825	30	-0.0257176	0.0257176	P32775	GLC3	1,4-alpha-glucan-branching enzyme	GLGB_YEAST	6	-1.05895	0.989411	40 min	0 min
40 min / 0 min	P32776	P32776	0.197545	0.197545	0.562417	20	0.137046	0.137046	P32776	TFB1	RNA polymerase II transcription factor B subunit 1	TFB1_YEAST	4	14.6746	1.14675	40 min	0 min
40 min / 0 min	P32781	P32781	0.160901	0.160901	0.781221	5	0.0948125	0.0948125	P32781	AGA2	A-agglutinin-binding subunit	AGA2_YEAST	1	11.7985	1.11798	40 min	0 min
40 min / 0 min	P32783	P32783	-0.111293	0.111293	0.556546	20	-0.259113	0.259113	P32783	ABD1	mRNA cap guanine-N7 methyltransferase	MCES_YEAST	5	-7.42421	0.925758	40 min	0 min
40 min / 0 min	P32784	P32784	0.286841	0.286841	0.730682	25	0.0858465	0.0858465	P32784	SCT1	Glycerol-3-phosphate O-acyltransferase 1	GPT1_YEAST	5	21.9966	1.21997	40 min	0 min
40 min / 0 min	P32785	P32785	-0.714404	0.714404	0.475345	5	-0.940183	0.940183	P32785	FMT1	Methionyl-tRNA formyltransferase, mitochondrial	FMT_YEAST	1	-39.0543	0.609457	40 min	0 min
40 min / 0 min	P32787	P32787	-0.0317807	0.0317807	0.798715	55	-0.00201077	0.00201077	P32787	MGM101	Mitochondrial genome maintenance protein MGM101	MG101_YEAST	10	-2.17878	0.978212	40 min	0 min
40 min / 0 min	P32790	P32790	0.0451183	0.0451183	0.677033	90	-0.033308	0.033308	P32790	SLA1	Actin cytoskeleton-regulatory complex protein SLA1	SLA1_YEAST	17	3.17678	1.03177	40 min	0 min
40 min / 0 min	P32791	P32791	0.186883	0.186883	0.573486	5	0.266363	0.266363	P32791	FRE1	Ferric/cupric reductase transmembrane component 1	FRE1_YEAST	1	13.8301	1.1383	40 min	0 min
40 min / 0 min	P32793	P32793	0.00125381	0.00125381	0.700387	10	-0.148454	0.148454	P32793	YSC84	Protein YSC84	YSC84_YEAST	2	0.0869451	1.00087	40 min	0 min
40 min / 0 min	P32794	P32794	-0.0454378	0.0454378	0.710931	45	0.203091	0.203091	P32794	AFG2	ATPase family gene 2 protein	AFG2_YEAST	8	-3.10043	0.968996	40 min	0 min
40 min / 0 min	P32795	P32795	-0.037031	0.037031	0.715789	70	-0.0277539	0.0277539	P32795	YME1	Mitochondrial inner membrane i-AAA protease supercomplex subunit YME1	YME1_YEAST	14	-2.53413	0.974659	40 min	0 min
40 min / 0 min	P32798	P32798	-0.079764	0.079764	0.676582	5	-0.0762087	0.0762087	P32798	COT1	Cobalt uptake protein COT1	COT1_YEAST	1	-5.37876	0.946212	40 min	0 min
40 min / 0 min	P32799	P32799	-0.112483	0.112483	0.779023	30	0.0104558	0.0104558	P32799	COX13	Cytochrome c oxidase subunit 6A, mitochondrial	COX13_YEAST	6	-7.50051	0.924995	40 min	0 min
40 min / 0 min	P32802	P32802	0.0387357	0.0387357	0.65482	35	0.0864234	0.0864234	P32802	EMP70	Transmembrane 9 superfamily member 1	TMN1_YEAST	6	2.72133	1.02721	40 min	0 min
40 min / 0 min	P32803	P32803	0.0527158	0.0527158	0.649438	35	0.0683044	0.0683044	P32803	EMP24	Endosomal protein P24B	EMP24_YEAST	5	3.72156	1.03722	40 min	0 min
40 min / 0 min	P32804	P32804	0.971754	0.971754	0.325531	5	0.967368	0.967368	P32804	ZRT1	Zinc-regulated transporter 1	ZRT1_YEAST	1	96.1223	1.96122	40 min	0 min
40 min / 0 min	P32806	P32806	0.164858	0.164858	0.590863	20	-0.211738	0.211738	P32806	GYP6	GTPase-activating protein GYP6	GYP6_YEAST	4	12.1055	1.12106	40 min	0 min
40 min / 0 min	P32807	P32807	-0.195178	0.195178	0.612624	10	-0.265215	0.265215	P32807	YKU70	ATP-dependent DNA helicase II subunit 1	KU70_YEAST	2	-12.6535	0.873465	40 min	0 min
40 min / 0 min	P32829	P32829	0.13607	0.13607	0.646492	10	0.196659	0.196659	P32829	MRE11	Double-strand break repair protein MRE11	MRE11_YEAST	2	9.89077	1.09891	40 min	0 min
40 min / 0 min	P32830	P32830	-0.0372831	0.0372831	0.750469	5	-0.0468997	0.0468997	P32830	TIM12	Mitochondrial import inner membrane translocase subunit TIM12	TIM12_YEAST	1	-2.55116	0.974488	40 min	0 min
40 min / 0 min	P32831	P32831	0.254226	0.254226	0.598607	10	0.140302	0.140302	P32831	NGR1	Negative growth regulatory protein NGR1	NGR1_YEAST	2	19.2696	1.1927	40 min	0 min
40 min / 0 min	P32832	P32832	-0.0158999	0.0158999	0.52857	50	-0.0806941	0.0806941	P32832	NPL6	Chromatin structure-remodeling complex subunit RSC7	RSC7_YEAST	10	-1.09604	0.98904	40 min	0 min
40 min / 0 min	P32835;P32836	P32835;P32836	0.023151	0.023151	0.519654	55	0.100139	0.100139	P32835;P32836	GSP1;GSP2	GTP-binding nuclear protein GSP1/CNR1;GTP-binding nuclear protein GSP2/CNR2	GSP1_YEAST;GSP2_YEAST	10	1.61765	1.01618	40 min	0 min
40 min / 0 min	P32839	P32839	-0.293765	0.293765	0.604903	20	-0.443404	0.443404	P32839	BCS1	Mitochondrial chaperone BCS1	BCS1_YEAST	4	-18.4229	0.815771	40 min	0 min
40 min / 0 min	P32842	P32842	0.159991	0.159991	0.65482	15	0.166016	0.166016	P32842	VMA11	V-type proton ATPase subunit c'	VATL2_YEAST	1	11.728	1.11728	40 min	0 min
40 min / 0 min	P32843	P32843	0.0156339	0.0156339	0.60651	50	0.142504	0.142504	P32843	YME2	Mitochondrial escape protein 2	YME2_YEAST	10	1.08956	1.0109	40 min	0 min
40 min / 0 min	P32849	P32849	0.206702	0.206702	0.606629	20	0.216148	0.216148	P32849	RAD5	DNA repair protein RAD5	RAD5_YEAST	4	15.4047	1.15405	40 min	0 min
40 min / 0 min	P32854	P32854	-0.0304811	0.0304811	0.742194	15	-0.0431156	0.0431156	P32854	PEP12	Syntaxin PEP12	PEP12_YEAST	3	-2.09063	0.979094	40 min	0 min
40 min / 0 min	P32855	P32855	0.114459	0.114459	0.657717	25	0.0896635	0.0896635	P32855	SEC8	Exocyst complex component SEC8	SEC8_YEAST	5	8.25687	1.08257	40 min	0 min
40 min / 0 min	P32857	P32857	0.157866	0.157866	0.762104	45	0.0234967	0.0234967	P32857	PTM1	Membrane protein PTM1	PTM1_YEAST	6	11.5636	1.11564	40 min	0 min
40 min / 0 min	P32860	P32860	-0.246499	0.246499	0.376336	55	-0.175661	0.175661	P32860	NFU1	NifU-like protein, mitochondrial	NFU1_YEAST	9	-15.7061	0.842939	40 min	0 min
40 min / 0 min	P32861	P32861	-0.047336	0.047336	0.562417	135	-0.0822753	0.0822753	P32861	UGP1	UTP--glucose-1-phosphate uridylyltransferase	UGPA1_YEAST	23	-3.22784	0.967722	40 min	0 min
40 min / 0 min	P32864	P32864	0.00874599	0.00874599	0.587813	45	-0.306803	0.306803	P32864	MRS6	Rab proteins geranylgeranyltransferase component A	RAEP_YEAST	9	0.608067	1.00608	40 min	0 min
40 min / 0 min	P32867	P32867	0.002095	0.002095	0.779561	20	0.0420338	0.0420338	P32867	SSO1	Protein SSO1	SSO1_YEAST	3	0.14532	1.00145	40 min	0 min
40 min / 0 min	P32873	P32873	-0.0824578	0.0824578	0.586606	20	-0.195663	0.195663	P32873	BEM3	GTPase-activating protein BEM3	BEM3_YEAST	4	-5.55527	0.944447	40 min	0 min
40 min / 0 min	P32874	P32874	0.0275542	0.0275542	0.774482	5	0.0208027	0.0208027	P32874	HFA1	Acetyl-CoA carboxylase, mitochondrial	HFA1_YEAST	1	1.92827	1.01928	40 min	0 min
40 min / 0 min	P32875	P32875	-0.121063	0.121063	0.545461	50	-0.243082	0.243082	P32875	LIP5	Lipoyl synthase, mitochondrial	LIPA_YEAST	10	-8.04899	0.91951	40 min	0 min
40 min / 0 min	P32891	P32891	-0.0484266	0.0484266	0.601242	160	0.0951202	0.0951202	P32891	DLD1	D-lactate dehydrogenase [cytochrome] 1, mitochondrial	DLD1_YEAST	21	-3.30097	0.96699	40 min	0 min
40 min / 0 min	P32892	P32892	0.0653681	0.0653681	0.739978	85	0.0514993	0.0514993	P32892	DRS1	ATP-dependent RNA helicase DRS1	DRS1_YEAST	16	4.63519	1.04635	40 min	0 min
40 min / 0 min	P32893	P32893	-0.11652	0.11652	0.658794	10	-0.315619	0.315619	P32893	TRS65	Trafficking protein particle complex II-specific subunit 65	TRS65_YEAST	2	-7.75898	0.92241	40 min	0 min
40 min / 0 min	P32895	P32895	0.329097	0.329097	0.672553	80	0.0537886	0.0537886	P32895	PRS1	Ribose-phosphate pyrophosphokinase 1	KPR1_YEAST	12	25.6227	1.25623	40 min	0 min
40 min / 0 min	P32896	P32896	0.0936063	0.0936063	0.658151	40	0.0642724	0.0642724	P32896	PDC2	Protein PDC2	PDC2_YEAST	8	6.70341	1.06703	40 min	0 min
40 min / 0 min	P32897	P32897	0.0173769	0.0173769	0.683534	30	0.0847139	0.0847139	P32897	TIM23	Mitochondrial import inner membrane translocase subunit TIM23	TIM23_YEAST	4	1.21176	1.01212	40 min	0 min
40 min / 0 min	P32898	P32898	0.0530131	0.0530131	0.681134	105	-0.0380283	0.0380283	P32898	CYM1	Mitochondrial presequence protease	CYM1_YEAST	20	3.74294	1.03743	40 min	0 min
40 min / 0 min	P32899	P32899	-0.0372628	0.0372628	0.585012	35	0.143451	0.143451	P32899	IMP3	U3 small nucleolar ribonucleoprotein protein IMP3	IMP3_YEAST	7	-2.54979	0.974502	40 min	0 min
40 min / 0 min	P32900	P32900	-0.111379	0.111379	0.585012	25	-0.316993	0.316993	P32900	SKG6	Protein SKG6	SKG6_YEAST	5	-7.42974	0.925703	40 min	0 min
40 min / 0 min	P32901	P32901	-0.388492	0.388492	0.507151	35	-0.353747	0.353747	P32901	PTR2	Peptide transporter PTR2	PTR2_YEAST	6	-23.6072	0.763928	40 min	0 min
40 min / 0 min	P32902	P32902	-0.14046	0.14046	0.769046	45	0.0217671	0.0217671	P32902	MRP4	37S ribosomal protein MRP4, mitochondrial	RT04_YEAST	9	-9.27704	0.90723	40 min	0 min
40 min / 0 min	P32904	P32904	-0.334152	0.334152	0.402064	10	-0.646297	0.646297	P32904	MRPL6	54S ribosomal protein L6, mitochondrial	RM06_YEAST	2	-20.675	0.79325	40 min	0 min
40 min / 0 min	P32906	P32906	-0.00724923	0.00724923	0.670541	25	0.0655514	0.0655514	P32906	MNS1	Endoplasmic reticulum mannosyl-oligosaccharide 1,2-alpha-mannosidase	MNS1_YEAST	5	-0.501218	0.994988	40 min	0 min
40 min / 0 min	P32908	P32908	0.049885	0.049885	0.622079	65	0.167317	0.167317	P32908	SMC1	Structural maintenance of chromosomes protein 1	SMC1_YEAST	13	3.51824	1.03518	40 min	0 min
40 min / 0 min	P32909	P32909	0.0436181	0.0436181	0.753482	20	0.024103	0.024103	P32909	SMY2	Protein SMY2	SMY2_YEAST	4	3.06955	1.0307	40 min	0 min
40 min / 0 min	P32910	P32910	-0.0466023	0.0466023	0.600528	30	0.473271	0.473271	P32910	RPC34	DNA-directed RNA polymerase III subunit RPC6	RPC6_YEAST	5	-3.17861	0.968214	40 min	0 min
40 min / 0 min	P32911	P32911	-0.0351097	0.0351097	0.717765	100	0.041865	0.041865	P32911	SUI1	Eukaryotic translation initiation factor eIF-1	SUI1_YEAST	11	-2.40425	0.975958	40 min	0 min
40 min / 0 min	P32912	P32912	0.0140791	0.0140791	0.798632	20	-0.00244656	0.00244656	P32912	VAM7	Vacuolar morphogenesis protein 7	VAM7_YEAST	4	0.980666	1.00981	40 min	0 min
40 min / 0 min	P32913	P32913	-0.0905548	0.0905548	0.737034	20	-0.0378958	0.0378958	P32913	VPS17	Vacuolar protein sorting-associated protein 17	VPS17_YEAST	4	-6.08385	0.939162	40 min	0 min
40 min / 0 min	P32914	P32914	-0.045641	0.045641	0.784473	25	0.0194105	0.0194105	P32914	SPT4	Transcription elongation factor SPT4	SPT4_YEAST	3	-3.11407	0.968859	40 min	0 min
40 min / 0 min	P32915	P32915	-0.603829	0.603829	0.607353	45	-0.225052	0.225052	P32915	SEC61	Protein transport protein SEC61	SC61A_YEAST	9	-34.1995	0.658005	40 min	0 min
40 min / 0 min	P32916	P32916	-0.211729	0.211729	0.562417	65	-0.170938	0.170938	P32916	SRP101	Signal recognition particle receptor subunit alpha homolog	SRPR_YEAST	13	-13.6498	0.863502	40 min	0 min
40 min / 0 min	P32939	P32939	-0.0229201	0.0229201	0.625724	50	-0.156441	0.156441	P32939	YPT7	GTP-binding protein YPT7	YPT7_YEAST	8	-1.57615	0.984239	40 min	0 min
40 min / 0 min	P33201	P33201	0.0243653	0.0243653	0.744242	65	0.0189374	0.0189374	P33201	MRT4	Ribosome assembly factor MRT4	MRT4_YEAST	11	1.70322	1.01703	40 min	0 min
40 min / 0 min	P33202	P33202	0.90818	0.90818	0.377892	30	0.855818	0.855818	P33202	UFD4	Ubiquitin fusion degradation protein 4	UFD4_YEAST	6	87.6677	1.87668	40 min	0 min
40 min / 0 min	P33203	P33203	0.00950533	0.00950533	0.667409	15	0.153754	0.153754	P33203	PRP40	Pre-mRNA-processing protein PRP40	PRP40_YEAST	3	0.661035	1.00661	40 min	0 min
40 min / 0 min	P33204	P33204	-0.0927118	0.0927118	0.581749	25	-0.523534	0.523534	P33204	ARC19	Actin-related protein 2/3 complex subunit 4	ARPC4_YEAST	4	-6.22416	0.937758	40 min	0 min
40 min / 0 min	P33296	P33296	-0.222383	0.222383	0.536043	15	-0.266616	0.266616	P33296	UBC6	Ubiquitin-conjugating enzyme E2 6	UBC6_YEAST	4	-14.2852	0.857148	40 min	0 min
40 min / 0 min	P33297	P33297	-0.0117885	0.0117885	0.379073	150	-0.1265	0.1265	P33297	RPT5	26S protease regulatory subunit 6A	PRS6A_YEAST	22	-0.813788	0.991862	40 min	0 min
40 min / 0 min	P33298	P33298	-0.00338835	0.00338835	0.770666	69	-0.0120242	0.0120242	P33298	RPT3	26S protease regulatory subunit 6B homolog	PRS6B_YEAST	11	-0.234587	0.997654	40 min	0 min
40 min / 0 min	P33299	P33299	0.0654969	0.0654969	0.742096	135	0.0289817	0.0289817	P33299	RPT1	26S protease regulatory subunit 7 homolog	PRS7_YEAST	21	4.64453	1.04645	40 min	0 min
40 min / 0 min	P33302	P33302	-0.0160273	0.0160273	0.574438	160	0.0781723	0.0781723	P33302	PDR5	Pleiotropic ABC efflux transporter of multiple drugs	PDR5_YEAST	26	-1.10478	0.988952	40 min	0 min
40 min / 0 min	P33307	P33307	0.146265	0.146265	0.54726	70	0.219993	0.219993	P33307	CSE1	Importin alpha re-exporter	CSE1_YEAST	14	10.67	1.1067	40 min	0 min
40 min / 0 min	P33308	P33308	0.0476539	0.0476539	0.762518	15	-0.0293341	0.0293341	P33308	CSE2	Mediator of RNA polymerase II transcription subunit 9	MED9_YEAST	3	3.35827	1.03358	40 min	0 min
40 min / 0 min	P33309	P33309	-0.201941	0.201941	0.425166	35	-0.157356	0.157356	P33309	DOM34	Protein DOM34	DOM34_YEAST	6	-13.062	0.86938	40 min	0 min
40 min / 0 min	P33311	P33311	-0.105585	0.105585	0.709963	30	-0.0508428	0.0508428	P33311	MDL2	ATP-dependent permease MDL2, mitochondrial	MDL2_YEAST	6	-7.05719	0.929428	40 min	0 min
40 min / 0 min	P33313	P33313	0.0691456	0.0691456	0.587122	70	0.151335	0.151335	P33313	CNS1	Hsp70/Hsp90 co-chaperone CNS1	CNS1_YEAST	14	4.90952	1.0491	40 min	0 min
40 min / 0 min	P33314	P33314	0.031012	0.031012	0.588824	25	0.225018	0.225018	P33314	BUD2	Inhibitory regulator protein BUD2/CLA2	BUD2_YEAST	5	2.17286	1.02173	40 min	0 min
40 min / 0 min	P33317	P33317	-0.0769693	0.0769693	0.481061	20	-0.145829	0.145829	P33317	DUT1	Deoxyuridine 5'-triphosphate nucleotidohydrolase	DUT_YEAST	4	-5.19529	0.948047	40 min	0 min
40 min / 0 min	P33322	P33322	0.12629	0.12629	0.501941	125	0.124655	0.124655	P33322	CBF5	H/ACA ribonucleoprotein complex subunit 4	CBF5_YEAST	19	9.14831	1.09148	40 min	0 min
40 min / 0 min	P33324	P33324	0.00396697	0.00396697	0.732175	20	0.215735	0.215735	P33324	YKL091C	CRAL-TRIO domain-containing protein YKL091C	YKJ1_YEAST	4	0.275348	1.00275	40 min	0 min
40 min / 0 min	P33327	P33327	0.0842485	0.0842485	0.778452	145	-0.0160278	0.0160278	P33327	GDH2	NAD-specific glutamate dehydrogenase	DHE2_YEAST	28	6.01354	1.06014	40 min	0 min
40 min / 0 min	P33328	P33328	-0.0551405	0.0551405	0.507128	15	-0.200625	0.200625	P33328	SNC2	Synaptobrevin homolog 2	SNC2_YEAST	2	-3.74993	0.962501	40 min	0 min
40 min / 0 min	P33329	P33329	-1.06059	1.06059	0.569279	10	-0.998153	0.998153	P33329	PPZ2	Serine/threonine-protein phosphatase PP-Z2	PPZ2_YEAST	2	-52.0566	0.479434	40 min	0 min
40 min / 0 min	P33330	P33330	-0.0103178	0.0103178	0.559931	150	-0.0753769	0.0753769	P33330	SER1	Phosphoserine aminotransferase	SERC_YEAST	18	-0.712627	0.992874	40 min	0 min
40 min / 0 min	P33331	P33331	-0.0447646	0.0447646	0.600592	25	-0.118089	0.118089	P33331	NTF2	Nuclear transport factor 2	NTF2_YEAST	4	-3.0552	0.969448	40 min	0 min
40 min / 0 min	P33332	P33332	-0.0900576	0.0900576	0.746678	35	-0.0312532	0.0312532	P33332	SEC3	Exocyst complex component SEC3	SEC3_YEAST	7	-6.05147	0.939485	40 min	0 min
40 min / 0 min	P33333	P33333	0.00254923	0.00254923	0.551643	80	0.116105	0.116105	P33333	SLC1	Probable 1-acyl-sn-glycerol-3-phosphate acyltransferase	PLSC_YEAST	13	0.176855	1.00177	40 min	0 min
40 min / 0 min	P33334	P33334	0.0805587	0.0805587	0.448551	80	0.138207	0.138207	P33334	PRP8	Pre-mRNA-splicing factor 8	PRP8_YEAST	17	5.74275	1.05743	40 min	0 min
40 min / 0 min	P33336	P33336	0.0142984	0.0142984	0.624056	15	0.350071	0.350071	P33336	SKN1	Beta-glucan synthesis-associated protein SKN1	SKN1_YEAST	3	0.996016	1.00996	40 min	0 min
40 min / 0 min	P33338	P33338	-0.0328454	0.0328454	0.546337	85	-0.331082	0.331082	P33338	SLA2	Protein SLA2	SLA2_YEAST	16	-2.25095	0.977491	40 min	0 min
40 min / 0 min	P33339	P33339	0.65553	0.65553	0.510724	15	1.03071	1.03071	P33339	TFC4	Transcription factor tau 131 kDa subunit	TFC4_YEAST	4	57.5195	1.57519	40 min	0 min
40 min / 0 min	P33399	P33399	-0.0363075	0.0363075	0.788938	75	-0.00418723	0.00418723	P33399	LHP1	La protein homolog	LHP1_YEAST	14	-2.48524	0.975148	40 min	0 min
40 min / 0 min	P33401	P33401	-0.0724882	0.0724882	0.625571	95	0.0812696	0.0812696	P33401	PGM1	Phosphoglucomutase 1	PGM1_YEAST	16	-4.90036	0.950996	40 min	0 min
40 min / 0 min	P33412	P33412	-0.471218	0.471218	0.639055	5	-0.367895	0.367895	P33412	ECT1	Ethanolamine-phosphate cytidylyltransferase	ECT1_YEAST	1	-27.8644	0.721356	40 min	0 min
40 min / 0 min	P33416	P33416	-0.04808	0.04808	0.483639	190	0.178601	0.178601	P33416	HSP78	Heat shock protein 78, mitochondrial	HSP78_YEAST	33	-3.27773	0.967223	40 min	0 min
40 min / 0 min	P33417	P33417	-0.101636	0.101636	0.511632	25	0.63887	0.63887	P33417	IXR1	Intrastrand cross-link recognition protein	IXR1_YEAST	5	-6.80243	0.931976	40 min	0 min
40 min / 0 min	P33418	P33418	0.0211874	0.0211874	0.719382	20	0.0594315	0.0594315	P33418	LOS1	Exportin-T	XPOT_YEAST	4	1.47944	1.01479	40 min	0 min
40 min / 0 min	P33421	P33421	-0.0404294	0.0404294	0.628142	5	-0.042666	0.042666	P33421	SDH3	Succinate dehydrogenase [ubiquinone] cytochrome b subunit, mitochondrial	SDH3_YEAST	1	-2.76345	0.972366	40 min	0 min
40 min / 0 min	P33441	P33441	-0.526318	0.526318	0.72177	25	0.13181	0.13181	P33441	MFT1	THO complex subunit MFT1	MFT1_YEAST	5	-30.5675	0.694325	40 min	0 min
40 min / 0 min	P33442	P33442	0.118495	0.118495	0.676426	195	0.0764384	0.0764384	P33442	RPS1A	40S ribosomal protein S1-A	RS3A1_YEAST	25	8.56018	1.0856	40 min	0 min
40 min / 0 min	P33734	P33734	-0.0189097	0.0189097	0.244485	265	-0.150571	0.150571	P33734	HIS7	Imidazole glycerol phosphate synthase hisHF	HIS5_YEAST	40	-1.30216	0.986978	40 min	0 min
40 min / 0 min	P33748	P33748	-0.0930838	0.0930838	0.604903	10	-0.0961075	0.0961075	P33748	MSN2	Zinc finger protein MSN2	MSN2_YEAST	2	-6.24833	0.937517	40 min	0 min
40 min / 0 min	P33749	P33749	0.016676	0.016676	0.680354	10	0.0884289	0.0884289	P33749	MSN4	Zinc finger protein MSN4	MSN4_YEAST	2	1.1626	1.01163	40 min	0 min
40 min / 0 min	P33750	P33750	-0.0221378	0.0221378	0.731376	75	0.0534374	0.0534374	P33750	SOF1	Protein SOF1	DCA13_YEAST	13	-1.52276	0.984772	40 min	0 min
40 min / 0 min	P33751	P33751	-0.289963	0.289963	0.708018	5	-0.187844	0.187844	P33751	PAD1	Phenylacrylic acid decarboxylase 1, mitochondrial	PAD1_YEAST	1	-18.2077	0.817923	40 min	0 min
40 min / 0 min	P33753	P33753	0.154447	0.154447	0.541177	20	0.105164	0.105164	P33753	TRM2	tRNA (uracil(54)-C(5))-methyltransferase	TRM2_YEAST	4	11.2995	1.113	40 min	0 min
40 min / 0 min	P33754	P33754	0.128165	0.128165	0.759489	25	0.0176572	0.0176572	P33754	SEC66	Translocation protein SEC66	SEC66_YEAST	5	9.29027	1.0929	40 min	0 min
40 min / 0 min	P33755	P33755	-0.0599331	0.0599331	0.507128	45	-0.125603	0.125603	P33755	NPL4	Nuclear protein localization protein 4	NPL4_YEAST	9	-4.06914	0.959309	40 min	0 min
40 min / 0 min	P33759	P33759	-0.12674	0.12674	0.784828	20	0.00686906	0.00686906	P33759	MRPS5	37S ribosomal protein S5, mitochondrial	RT05_YEAST	4	-8.41012	0.915899	40 min	0 min
40 min / 0 min	P33760	P33760	-0.850265	0.850265	0.62327	10	-0.764609	0.764609	P33760	PEX6	Peroxisomal ATPase PEX6	PEX6_YEAST	2	-44.5317	0.554683	40 min	0 min
40 min / 0 min	P33767	P33767	0.0826165	0.0826165	0.606459	65	0.138758	0.138758	P33767	WBP1	Dolichyl-diphosphooligosaccharide--protein glycosyltransferase subunit WBP1	OSTB_YEAST	12	5.89368	1.05894	40 min	0 min
40 min / 0 min	P33775	P33775	0.0306431	0.0306431	0.668402	80	-0.0359806	0.0359806	P33775	PMT1	Dolichyl-phosphate-mannose--protein mannosyltransferase 1	PMT1_YEAST	14	2.14673	1.02147	40 min	0 min
40 min / 0 min	P33891	P33891	0.179844	0.179844	0.59341	15	0.242639	0.242639	P33891	TIP20	Protein transport protein TIP20	TIP20_YEAST	3	13.2761	1.13276	40 min	0 min
40 min / 0 min	P33892	P33892	0.121314	0.121314	0.374872	570	0.102955	0.102955	P33892	GCN1	Translational activator GCN1	GCN1_YEAST	101	8.77248	1.08772	40 min	0 min
40 min / 0 min	P33894	P33894	0.143052	0.143052	0.448551	20	0.383396	0.383396	P33894	STE13	Dipeptidyl aminopeptidase A	STE13_YEAST	4	10.4239	1.10424	40 min	0 min
40 min / 0 min	P33895	P33895	-0.0546118	0.0546118	0.715444	5	-0.0581064	0.0581064	P33895	NUF2	Kinetochore protein NUF2	NUF2_YEAST	1	-3.71465	0.962853	40 min	0 min
40 min / 0 min	P34072	P34072	0.351742	0.351742	0.521177	10	0.301523	0.301523	P34072	MKS1	Negative regulator of RAS-cAMP pathway	MKS1_YEAST	2	27.6101	1.2761	40 min	0 min
40 min / 0 min	P34077	P34077	-0.0779836	0.0779836	0.585414	75	-0.106883	0.106883	P34077	NIC96	Nucleoporin NIC96	NIC96_YEAST	14	-5.26192	0.947381	40 min	0 min
40 min / 0 min	P34078	P34078	0.0311356	0.0311356	0.625724	30	0.0961876	0.0961876	P34078	LTV1	Protein LTV1	LTV1_YEAST	5	2.18161	1.02182	40 min	0 min
40 min / 0 min	P34087	P34087	-0.104137	0.104137	0.617121	15	-0.191513	0.191513	P34087	RPB7	DNA-directed RNA polymerase II subunit RPB7	RPB7_YEAST	3	-6.96384	0.930362	40 min	0 min
40 min / 0 min	P34110	P34110	-0.118635	0.118635	0.69509	25	0.135184	0.135184	P34110	VPS35	Vacuolar protein sorting-associated protein 35	VPS35_YEAST	5	-7.8941	0.921059	40 min	0 min
40 min / 0 min	P34111	P34111	-0.16075	0.16075	0.641974	15	-0.177561	0.177561	P34111	TFC3	Transcription factor tau 138 kDa subunit	TFC3_YEAST	3	-10.544	0.89456	40 min	0 min
40 min / 0 min	P34160	P34160	-0.00344699	0.00344699	0.545401	95	0.188541	0.188541	P34160	STO1	Nuclear cap-binding protein complex subunit 1	NCBP1_YEAST	17	-0.238642	0.997614	40 min	0 min
40 min / 0 min	P34162	P34162	0.0228947	0.0228947	0.772591	30	0.00924636	0.00924636	P34162	SRB2	Mediator of RNA polymerase II transcription subunit 20	MED20_YEAST	6	1.5996	1.016	40 min	0 min
40 min / 0 min	P34163	P34163	-0.0315736	0.0315736	0.799024	45	-0.00241372	0.00241372	P34163	TGL1	Sterol esterase TGL1	TGL1_YEAST	9	-2.16474	0.978353	40 min	0 min
40 min / 0 min	P34164	P34164	0.00588439	0.00588439	0.79101	10	-0.0118559	0.0118559	P34164	SIP2	SNF1 protein kinase subunit beta-2	SIP2_YEAST	2	0.408708	1.00409	40 min	0 min
40 min / 0 min	P34167	P34167	-0.0315142	0.0315142	0.639144	205	-0.0567574	0.0567574	P34167	TIF3	Eukaryotic translation initiation factor 4B	IF4B_YEAST	32	-2.16071	0.978393	40 min	0 min
40 min / 0 min	P34216	P34216	0.0487604	0.0487604	0.708932	195	-0.0232312	0.0232312	P34216	EDE1	EH domain-containing and endocytosis protein 1	EDE1_YEAST	34	3.43758	1.03438	40 min	0 min
40 min / 0 min	P34217	P34217	0.122047	0.122047	0.434254	45	0.384499	0.384499	P34217	PIN4	RNA-binding protein PIN4	PIN4_YEAST	8	8.82776	1.08828	40 min	0 min
40 min / 0 min	P34219	P34219	-1.71611	1.71611	0.651139	5	-0.644878	0.644878	P34219	TOD6	Transcriptional regulatory protein TOD6	TOD6_YEAST	1	-69.5633	0.304367	40 min	0 min
40 min / 0 min	P34220	P34220	-0.204336	0.204336	0.462624	50	-0.252918	0.252918	P34220	YBL055C	Deoxyribonuclease Tat-D	YBF5_YEAST	10	-13.2062	0.867938	40 min	0 min
40 min / 0 min	P34221	P34221	-0.0340196	0.0340196	0.367907	55	-0.215582	0.215582	P34221	PTC3	Protein phosphatase 2C homolog 3	PP2C3_YEAST	9	-2.33047	0.976695	40 min	0 min
40 min / 0 min	P34222	P34222	-0.063087	0.063087	0.519654	20	-0.103868	0.103868	P34222	PTH2	Peptidyl-tRNA hydrolase 2	PTH2_YEAST	4	-4.27863	0.957214	40 min	0 min
40 min / 0 min	P34223	P34223	-0.143026	0.143026	0.796787	80	-0.00478076	0.00478076	P34223	SHP1	UBX domain-containing protein 1	UBX1_YEAST	12	-9.43821	0.905618	40 min	0 min
40 min / 0 min	P34224	P34224	-0.14326	0.14326	0.587813	5	-0.15991	0.15991	P34224	YBL059W	Uncharacterized protein YBL059W	YBF9_YEAST	1	-9.45292	0.905471	40 min	0 min
40 min / 0 min	P34226	P34226	-0.068225	0.068225	0.331942	25	-0.123299	0.123299	P34226	SKT5	Protein SKT5	SKT5_YEAST	5	-4.61892	0.953811	40 min	0 min
40 min / 0 min	P34227	P34227	0.0107678	0.0107678	0.433281	60	0.174998	0.174998	P34227	PRX1	Mitochondrial peroxiredoxin PRX1	PRX1_YEAST	9	0.74916	1.00749	40 min	0 min
40 min / 0 min	P34232	P34232	-0.192974	0.192974	0.600233	5	-0.179469	0.179469	P34232	MTR2	mRNA transport regulator MTR2	MTR2_YEAST	1	-12.5199	0.874801	40 min	0 min
40 min / 0 min	P34234	P34234	0.360685	0.360685	0.783165	5	0.0619947	0.0619947	P34234	LOT5	Protein LOT5	LOT5_YEAST	1	28.4035	1.28404	40 min	0 min
40 min / 0 min	P34237	P34237	-0.0490616	0.0490616	0.517418	55	-0.0800784	0.0800784	P34237	COY1	Protein CASP	CASP_YEAST	11	-3.34351	0.966565	40 min	0 min
40 min / 0 min	P34240	P34240	0.432107	0.432107	0.599421	10	0.783503	0.783503	P34240	ZRT3	Zinc-regulated transporter 3	ZRT3_YEAST	1	34.9203	1.3492	40 min	0 min
40 min / 0 min	P34241	P34241	0.0722645	0.0722645	0.54475	115	0.167068	0.167068	P34241	URB1	Nucleolar pre-ribosomal-associated protein 1	URB1_YEAST	23	5.13656	1.05137	40 min	0 min
40 min / 0 min	P34243	P34243	-0.0396718	0.0396718	0.744885	10	-0.0413106	0.0413106	P34243	HCS1	DNA polymerase alpha-associated DNA helicase A	HCS1_YEAST	2	-2.71237	0.972876	40 min	0 min
40 min / 0 min	P34247	P34247	-0.0780777	0.0780777	0.737607	15	-0.0286897	0.0286897	P34247	UTP11	U3 small nucleolar RNA-associated protein 11	UTP11_YEAST	3	-5.2681	0.947319	40 min	0 min
40 min / 0 min	P34248	P34248	-0.133466	0.133466	0.463457	20	-0.216248	0.216248	P34248	YKL100C	Probable intramembrane protease YKL100C	YKK0_YEAST	4	-8.83613	0.911639	40 min	0 min
40 min / 0 min	P34250	P34250	-0.104778	0.104778	0.618603	5	-0.106392	0.106392	P34250	SEG2	Eisosome protein SEG2	SEG2_YEAST	1	-7.00519	0.929948	40 min	0 min
40 min / 0 min	P34253	P34253	0.0511199	0.0511199	0.617255	30	0.0619364	0.0619364	P34253	KTI12	Protein KTI12	KTI12_YEAST	6	3.60688	1.03607	40 min	0 min
40 min / 0 min	P34730	P34730	-0.0616275	0.0616275	0.600528	25	0.163992	0.163992	P34730	BMH2	Protein BMH2	BMH2_YEAST	4	-4.18174	0.958183	40 min	0 min
40 min / 0 min	P34760	P34760	0.203878	0.203878	0.769438	110	0.0326367	0.0326367	P34760	TSA1	Peroxiredoxin TSA1	TSA1_YEAST	17	15.179	1.15179	40 min	0 min
40 min / 0 min	P34761	P34761	0.0408818	0.0408818	0.621722	20	0.142519	0.142519	P34761	WHI3	Protein WHI3	WHI3_YEAST	4	2.87424	1.02874	40 min	0 min
40 min / 0 min	P34909	P34909	-0.0431227	0.0431227	0.560768	45	-0.147689	0.147689	P34909	MOT2	General negative regulator of transcription subunit 4	NOT4_YEAST	8	-2.94481	0.970552	40 min	0 min
40 min / 0 min	P35056	P35056	0.107075	0.107075	0.581749	20	0.563504	0.563504	P35056	PEX5	Peroxisomal targeting signal receptor	PEX5_YEAST	4	7.70425	1.07704	40 min	0 min
40 min / 0 min	P35127	P35127	-0.138603	0.138603	0.529083	20	-0.205391	0.205391	P35127	YUH1	Ubiquitin carboxyl-terminal hydrolase YUH1	UBL1_YEAST	4	-9.16015	0.908398	40 min	0 min
40 min / 0 min	P35169	P35169	-0.170851	0.170851	0.684995	50	0.0675159	0.0675159	P35169	TOR1	Serine/threonine-protein kinase TOR1	TOR1_YEAST	10	-11.1682	0.888318	40 min	0 min
40 min / 0 min	P35176	P35176	0.0876837	0.0876837	0.635073	70	-0.11751	0.11751	P35176	CPR5	Peptidyl-prolyl cis-trans isomerase D	CYPD_YEAST	6	6.26627	1.06266	40 min	0 min
40 min / 0 min	P35177	P35177	0.0275757	0.0275757	0.563715	20	0.177288	0.177288	P35177	SPT7	Transcriptional activator SPT7	SPT7_YEAST	4	1.92979	1.0193	40 min	0 min
40 min / 0 min	P35178	P35178	0.119602	0.119602	0.560258	50	0.157978	0.157978	P35178	RRP1	Ribosomal RNA-processing protein 1	RRP1_YEAST	8	8.64354	1.08644	40 min	0 min
40 min / 0 min	P35179	P35179	0.10285	0.10285	0.770992	10	0.0127957	0.0127957	P35179	SSS1	Protein transport protein SSS1	SC61G_YEAST	2	7.3893	1.07389	40 min	0 min
40 min / 0 min	P35180	P35180	-0.0606381	0.0606381	0.600904	40	-0.0975794	0.0975794	P35180	TOM20	Mitochondrial import receptor subunit TOM20	TOM20_YEAST	6	-4.116	0.95884	40 min	0 min
40 min / 0 min	P35181	P35181	-0.137977	0.137977	0.517765	15	-0.145684	0.145684	P35181	APS1	AP-1 complex subunit sigma-1	AP1S1_YEAST	3	-9.12075	0.908792	40 min	0 min
40 min / 0 min	P35183	P35183	-0.0243774	0.0243774	0.704783	35	0.097681	0.097681	P35183	AST1	Protein AST1	AST1_YEAST	6	-1.67552	0.983245	40 min	0 min
40 min / 0 min	P35184	P35184	0.112362	0.112362	0.671114	35	0.100664	0.100664	P35184	SQT1	Ribosome assembly protein SQT1	SQT1_YEAST	6	8.09966	1.081	40 min	0 min
40 min / 0 min	P35189	P35189	-0.075915	0.075915	0.591229	40	0.400873	0.400873	P35189	TAF14	Transcription initiation factor TFIID subunit 14	TAF14_YEAST	6	-5.12598	0.94874	40 min	0 min
40 min / 0 min	P35191	P35191	0.212907	0.212907	0.0501102	40	0.337736	0.337736	P35191	MDJ1	DnaJ homolog 1, mitochondrial	MDJ1_YEAST	7	15.9022	1.15902	40 min	0 min
40 min / 0 min	P35193	P35193	0.547869	0.547869	0.645888	20	0.248838	0.248838	P35193	ATG19	Autophagy-related protein 19	ATG19_YEAST	4	46.1925	1.46192	40 min	0 min
40 min / 0 min	P35194	P35194	0.106667	0.106667	0.762329	190	0.0247124	0.0247124	P35194	UTP20	U3 small nucleolar RNA-associated protein 20	UTP20_YEAST	38	7.67376	1.07674	40 min	0 min
40 min / 0 min	P35196	P35196	-0.133241	0.133241	0.618277	10	-0.18919	0.18919	P35196	RER2	Dehydrodolichyl diphosphate syntase complex subunit RER2	RER2_YEAST	2	-8.82191	0.911781	40 min	0 min
40 min / 0 min	P35197	P35197	-0.0498971	0.0498971	0.470865	110	-0.178734	0.178734	P35197	GCS1	ADP-ribosylation factor GTPase-activating protein GCS1	GCS1_YEAST	18	-3.39948	0.966005	40 min	0 min
40 min / 0 min	P35201	P35201	-0.062157	0.062157	0.696512	10	0.128258	0.128258	P35201	MIF2	Protein MIF2	MIF2_YEAST	2	-4.2169	0.957831	40 min	0 min
40 min / 0 min	P35202	P35202	-0.101378	0.101378	0.364096	20	-0.223513	0.223513	P35202	THI80	Thiamine pyrophosphokinase	THI80_YEAST	4	-6.7858	0.932142	40 min	0 min
40 min / 0 min	P35207	P35207	-0.163811	0.163811	0.558517	80	0.330592	0.330592	P35207	SKI2	Antiviral helicase SKI2	SKI2_YEAST	14	-10.7336	0.892664	40 min	0 min
40 min / 0 min	P35688	P35688	-1.42229	1.42229	0.762568	5	-0.14962	0.14962	P35688	LRG1	Rho-GTPase-activating protein LRG1	LRG1_YEAST	1	-62.688	0.37312	40 min	0 min
40 min / 0 min	P35691	P35691	0.0407246	0.0407246	0.579099	60	0.0615168	0.0615168	P35691	TMA19	Translationally-controlled tumor protein homolog	TCTP_YEAST	10	2.86304	1.02863	40 min	0 min
40 min / 0 min	P35718	P35718	-0.0557214	0.0557214	0.692134	5	-0.0633479	0.0633479	P35718	RPC25	DNA-directed RNA polymerase III subunit RPC8	RPC8_YEAST	1	-3.78868	0.962113	40 min	0 min
40 min / 0 min	P35719	P35719	-0.0860136	0.0860136	0.791837	90	0.00526422	0.00526422	P35719	MRP8	Uncharacterized protein MRP8	MRP8_YEAST	15	-5.78776	0.942122	40 min	0 min
40 min / 0 min	P35723	P35723	-0.042714	0.042714	0.603933	25	-0.067606	0.067606	P35723	YET1	Endoplasmic reticulum transmembrane protein 1	YET1_YEAST	5	-2.91731	0.970827	40 min	0 min
40 min / 0 min	P35724	P35724	-0.142439	0.142439	0.394141	10	-0.149518	0.149518	P35724	MNR2	Manganese resistance protein MNR2	MNR2_YEAST	2	-9.40138	0.905986	40 min	0 min
40 min / 0 min	P35725	P35725	-0.00165483	0.00165483	0.742568	5	0.113585	0.113585	P35725	YKL063C	Uncharacterized protein YKL063C	YKG3_YEAST	1	-0.114639	0.998854	40 min	0 min
40 min / 0 min	P35727	P35727	0.069127	0.069127	0.796319	15	0.0063425	0.0063425	P35727	BLI1	Biogenesis of lysosome-related organelles complex 1 subunit BLI1	BLI1_YEAST	3	4.90817	1.04908	40 min	0 min
40 min / 0 min	P35728	P35728	-0.231421	0.231421	0.531981	15	-0.17783	0.17783	P35728	MPE1	Protein MPE1	MPE1_YEAST	3	-14.8205	0.851795	40 min	0 min
40 min / 0 min	P35729	P35729	-0.0558957	0.0558957	0.755656	65	-0.0316364	0.0316364	P35729	NUP120	Nucleoporin NUP120	NU120_YEAST	13	-3.8003	0.961997	40 min	0 min
40 min / 0 min	P35732	P35732	0.115485	0.115485	0.463457	60	0.170626	0.170626	P35732	DEF1	RNA polymerase II degradation factor 1	DEF1_YEAST	10	8.33394	1.08334	40 min	0 min
40 min / 0 min	P35735	P35735	-0.131275	0.131275	0.792625	5	-0.0254388	0.0254388	P35735	SFK1	Protein SFK1	SFK1_YEAST	1	-8.69756	0.913024	40 min	0 min
40 min / 0 min	P35817	P35817	-0.0744118	0.0744118	0.654749	40	-0.161563	0.161563	P35817	BDF1	Bromodomain-containing factor 1	BDF1_YEAST	8	-5.02707	0.949729	40 min	0 min
40 min / 0 min	P35842;P38693	P35842;P38693	0.0788015	0.0788015	0.625644	5	0.0972644	0.0972644	P35842;P38693	PHO11;PHO12	Acid phosphatase PHO11;Acid phosphatase PHO12	PPAB_YEAST;PPAC_YEAST	1	5.61403	1.05614	40 min	0 min
40 min / 0 min	P35844	P35844	-0.0548734	0.0548734	0.643588	120	0.0387198	0.0387198	P35844	KES1	Protein KES1	KES1_YEAST	17	-3.73211	0.962679	40 min	0 min
40 min / 0 min	P35845	P35845	0.104821	0.104821	0.758915	65	0.0184811	0.0184811	P35845	SWH1	Oxysterol-binding protein homolog 1	OSH1_YEAST	13	7.53607	1.07536	40 min	0 min
40 min / 0 min	P35996	P35996	0.901625	0.901625	0.54475	10	0.88906	0.88906	P35996	MRPL38	54S ribosomal protein L38, mitochondrial	RM38_YEAST	2	86.817	1.86817	40 min	0 min
40 min / 0 min	P35997;P38711	P35997;P38711	0.110131	0.110131	0.554298	45	0.111049	0.111049	P35997;P38711	RPS27A;RPS27B	40S ribosomal protein S27-A;40S ribosomal protein S27-B	RS27_YEAST;RS27B_YEAST	5	7.93265	1.07933	40 min	0 min
40 min / 0 min	P35999	P35999	0.00500279	0.00500279	0.703222	25	-0.198202	0.198202	P35999	2001-10-01	Mitochondrial intermediate peptidase	PMIP_YEAST	5	0.347369	1.00347	40 min	0 min
40 min / 0 min	P36000	P36000	0.0532061	0.0532061	0.559072	40	-0.235081	0.235081	P36000	APL2	AP-1 complex subunit beta-1	AP1B1_YEAST	8	3.75681	1.03757	40 min	0 min
40 min / 0 min	P36004	P36004	-0.0714369	0.0714369	0.763347	5	-0.0784202	0.0784202	P36004	KKQ8	Probable serine/threonine-protein kinase KKQ8	KKQ8_YEAST	2	-4.83103	0.95169	40 min	0 min
40 min / 0 min	P36006	P36006	-0.0774602	0.0774602	0.585012	95	0.0954455	0.0954455	P36006	MYO3	Myosin-3	MYO3_YEAST	18	-5.22754	0.947725	40 min	0 min
40 min / 0 min	P36007	P36007	-0.236418	0.236418	0.788435	70	-0.016208	0.016208	P36007	SRY1	Threo-3-hydroxyaspartate ammonia-lyase	SRY1_YEAST	10	-15.115	0.84885	40 min	0 min
40 min / 0 min	P36008	P36008	0.138417	0.138417	0.551309	115	0.139456	0.139456	P36008	TEF4	Elongation factor 1-gamma 2	EF1G2_YEAST	18	10.0696	1.1007	40 min	0 min
40 min / 0 min	P36009	P36009	0.207236	0.207236	0.753496	10	0.0897022	0.0897022	P36009	DHR2	Probable ATP-dependent RNA helicase DHR2	DHR2_YEAST	2	15.4474	1.15447	40 min	0 min
40 min / 0 min	P36010	P36010	-0.0099005	0.0099005	0.586454	70	0.0544204	0.0544204	P36010	YNK1	Nucleoside diphosphate kinase	NDK_YEAST	10	-0.683901	0.993161	40 min	0 min
40 min / 0 min	P36013	P36013	0.0172492	0.0172492	0.55261	235	0.0630824	0.0630824	P36013	MAE1	NAD-dependent malic enzyme, mitochondrial	MAOM_YEAST	33	1.2028	1.01203	40 min	0 min
40 min / 0 min	P36015	P36015	-0.388078	0.388078	0.500343	100	-0.201771	0.201771	P36015	YKT6	Synaptobrevin homolog YKT6	YKT6_YEAST	15	-23.5853	0.764147	40 min	0 min
40 min / 0 min	P36016	P36016	0.0234251	0.0234251	0.778331	110	0.00797979	0.00797979	P36016	LHS1	Heat shock protein 70 homolog LHS1	LHS1_YEAST	20	1.63696	1.01637	40 min	0 min
40 min / 0 min	P36017	P36017	0.00447565	0.00447565	0.623945	35	-0.0569798	0.0569798	P36017	VPS21	Vacuolar protein sorting-associated protein 21	VPS21_YEAST	6	0.31071	1.00311	40 min	0 min
40 min / 0 min	P36018	P36018	0.0121939	0.0121939	0.636553	55	-0.0524045	0.0524045	P36018	YPT52	GTP-binding protein YPT52	YPT52_YEAST	10	0.848799	1.00849	40 min	0 min
40 min / 0 min	P36024	P36024	0.139589	0.139589	0.650931	65	0.0401126	0.0401126	P36024	SIS2	Phosphopantothenoylcysteine decarboxylase subunit SIS2	SIS2_YEAST	13	10.1591	1.10159	40 min	0 min
40 min / 0 min	P36027	P36027	-0.162661	0.162661	0.617857	5	-0.166844	0.166844	P36027	MID2	Cell wall integrity sensor MID2	MID2_YEAST	1	-10.6624	0.893376	40 min	0 min
40 min / 0 min	P36029	P36029	0.0136511	0.0136511	0.476876	25	-0.825991	0.825991	P36029	TPO5	Polyamine transporter TPO5	TPO5_YEAST	5	0.950713	1.00951	40 min	0 min
40 min / 0 min	P36034	P36034	0.121633	0.121633	0.703524	10	0.0934184	0.0934184	P36034	COS9	Protein COS9	COS9_YEAST	2	8.79656	1.08797	40 min	0 min
40 min / 0 min	P36036	P36036	-0.139367	0.139367	0.65672	30	-0.13141	0.13141	P36036	YRA2	RNA annealing protein YRA2	YRA2_YEAST	5	-9.20824	0.907918	40 min	0 min
40 min / 0 min	P36037	P36037	-0.0533571	0.0533571	0.571605	90	-0.119351	0.119351	P36037	DOA1	Protein DOA1	DOA1_YEAST	18	-3.63087	0.963691	40 min	0 min
40 min / 0 min	P36039	P36039	0.118211	0.118211	0.781039	5	0.0607518	0.0607518	P36039	EMC3	ER membrane protein complex subunit 3	EMC3_YEAST	1	8.53882	1.08539	40 min	0 min
40 min / 0 min	P36040	P36040	-0.189863	0.189863	0.575402	20	-0.27556	0.27556	P36040	ADD66	Proteasome assembly chaperone 2	POC2_YEAST	4	-12.3311	0.876689	40 min	0 min
40 min / 0 min	P36041	P36041	0.123803	0.123803	0.725222	60	-0.0340061	0.0340061	P36041	EAP1	Protein EAP1	EAP1_YEAST	11	8.96031	1.0896	40 min	0 min
40 min / 0 min	P36046	P36046	-0.0651558	0.0651558	0.709011	30	-0.0782028	0.0782028	P36046	MIA40	Mitochondrial intermembrane space import and assembly protein 40	MIA40_YEAST	7	-4.41579	0.955842	40 min	0 min
40 min / 0 min	P36047	P36047	0.212982	0.212982	0.574438	60	0.106409	0.106409	P36047	SDS22	Protein phosphatase 1 regulatory subunit SDS22	SDS22_YEAST	12	15.9081	1.15908	40 min	0 min
40 min / 0 min	P36048	P36048	0.0830291	0.0830291	0.718099	40	0.04455	0.04455	P36048	SNU114	Pre-mRNA-splicing factor SNU114	SN114_YEAST	8	5.92397	1.05924	40 min	0 min
40 min / 0 min	P36049	P36049	0.209212	0.209212	0.56441	65	0.127545	0.127545	P36049	EBP2	rRNA-processing protein EBP2	EBP2_YEAST	10	15.6057	1.15606	40 min	0 min
40 min / 0 min	P36051	P36051	-0.0243669	0.0243669	0.768552	25	-0.0145116	0.0145116	P36051	MCD4	GPI ethanolamine phosphate transferase 1	MCD4_YEAST	5	-1.6748	0.983252	40 min	0 min
40 min / 0 min	P36053	P36053	-0.140537	0.140537	0.664814	20	-0.0593343	0.0593343	P36053	ELF1	Transcription elongation factor 1	ELF1_YEAST	3	-9.28188	0.907181	40 min	0 min
40 min / 0 min	P36056	P36056	0.304107	0.304107	0.632159	25	-0.235396	0.235396	P36056	RSM22	37S ribosomal protein S22, mitochondrial	RT22_YEAST	5	23.4654	1.23465	40 min	0 min
40 min / 0 min	P36057	P36057	-0.0835953	0.0835953	0.783611	20	-0.0118858	0.0118858	P36057	SRP102	Signal recognition particle receptor subunit beta	SRPB_YEAST	4	-5.6297	0.943703	40 min	0 min
40 min / 0 min	P36059	P36059	-0.0480827	0.0480827	0.616435	25	0.192743	0.192743	P36059	YKL151C	ATP-dependent (S)-NAD(P)H-hydrate dehydratase	NNRD_YEAST	5	-3.27791	0.967221	40 min	0 min
40 min / 0 min	P36060	P36060	0.0783432	0.0783432	0.586606	100	0.193867	0.193867	P36060	MCR1	NADH-cytochrome b5 reductase 2	MCR1_YEAST	14	5.58049	1.0558	40 min	0 min
40 min / 0 min	P36062	P36062	-0.18347	0.18347	0.692259	10	0.326548	0.326548	P36062	AVT3	Vacuolar amino acid transporter 3	AVT3_YEAST	2	-11.9417	0.880583	40 min	0 min
40 min / 0 min	P36064	P36064	-0.141491	0.141491	0.547105	10	-0.215174	0.215174	P36064	CMC1	COX assembly mitochondrial protein	COXM1_YEAST	2	-9.34182	0.906582	40 min	0 min
40 min / 0 min	P36068	P36068	-0.0462441	0.0462441	0.588824	10	0.3267	0.3267	P36068	SHE2	SWI5-dependent HO expression protein 2	SHE2_YEAST	2	-3.15457	0.968454	40 min	0 min
40 min / 0 min	P36069	P36069	-0.169426	0.169426	0.488477	30	-0.411812	0.411812	P36069	PMU1	Probable phosphomutase PMU1	PMU1_YEAST	6	-11.0803	0.889197	40 min	0 min
40 min / 0 min	P36076	P36076	0.609068	0.609068	0.800818	25	-0.000465931	0.000465931	P36076	CAB3	Coenzyme A biosynthesis protein 3	CAB3_YEAST	5	52.5274	1.52527	40 min	0 min
40 min / 0 min	P36080	P36080	0.0852581	0.0852581	0.562024	20	-0.361709	0.361709	P36080	RRP14	Ribosomal RNA-processing protein 14	RRP14_YEAST	4	6.08775	1.06088	40 min	0 min
40 min / 0 min	P36081	P36081	-0.0804464	0.0804464	0.604903	50	-0.0583803	0.0583803	P36081	YKL077W	Uncharacterized protein YKL077W	YKH7_YEAST	9	-5.4235	0.945765	40 min	0 min
40 min / 0 min	P36084	P36084	0.0747565	0.0747565	0.607784	10	0.09403	0.09403	P36084	MUD2	Splicing factor MUD2	MUD2_YEAST	2	5.31833	1.05318	40 min	0 min
40 min / 0 min	P36088	P36088	-0.263512	0.263512	0.610737	10	-0.132552	0.132552	P36088	YKL069W	Free methionine-R-sulfoxide reductase	FRMSR_YEAST	2	-16.6943	0.833057	40 min	0 min
40 min / 0 min	P36090	P36090	-0.155541	0.155541	0.651943	35	-0.069687	0.069687	P36090	ANR2	Uncharacterized protein ANR2	ANR2_YEAST	8	-10.2204	0.897796	40 min	0 min
40 min / 0 min	P36091	P36091	-0.00409088	0.00409088	0.694729	15	-0.0655488	0.0655488	P36091	DCW1	Mannan endo-1,6-alpha-mannosidase DCW1	DCW1_YEAST	3	-0.283157	0.997168	40 min	0 min
40 min / 0 min	P36094	P36094	0.0981625	0.0981625	0.795047	5	-0.0233655	0.0233655	P36094	SPC42	Spindle pole body component SPC42	SPC42_YEAST	1	7.04093	1.07041	40 min	0 min
40 min / 0 min	P36095	P36095	-0.292197	0.292197	0.669779	20	0.268502	0.268502	P36095	VPS24	Vacuolar protein-sorting-associated protein 24	VPS24_YEAST	3	-18.3342	0.816658	40 min	0 min
40 min / 0 min	P36100	P36100	-0.151939	0.151939	0.797149	20	-0.0123905	0.0123905	P36100	TFA1	Transcription initiation factor IIE subunit alpha	T2EA_YEAST	4	-9.996	0.90004	40 min	0 min
40 min / 0 min	P36101	P36101	-0.234844	0.234844	0.481061	70	-0.283988	0.283988	P36101	TCD2	tRNA threonylcarbamoyladenosine dehydratase 2	TCD2_YEAST	14	-15.0223	0.849777	40 min	0 min
40 min / 0 min	P36102	P36102	-0.0742216	0.0742216	0.567702	15	-0.111494	0.111494	P36102	PAN3	PAB-dependent poly(A)-specific ribonuclease subunit PAN3	PAN3_YEAST	3	-5.01455	0.949854	40 min	0 min
40 min / 0 min	P36103	P36103	-0.605573	0.605573	0.488358	25	-0.65394	0.65394	P36103	YKL023W	Uncharacterized protein YKL023W	YKC3_YEAST	5	-34.279	0.65721	40 min	0 min
40 min / 0 min	P36104	P36104	0.00769407	0.00769407	0.579099	30	0.241217	0.241217	P36104	SWD2	COMPASS component SWD2	SWD2_YEAST	5	0.534737	1.00535	40 min	0 min
40 min / 0 min	P36105	P36105	-0.0398664	0.0398664	0.65482	65	0.0393501	0.0393501	P36105	RPL14A	60S ribosomal protein L14-A	RL14A_YEAST	10	-2.72549	0.972745	40 min	0 min
40 min / 0 min	P36106	P36106	0.18922	0.18922	0.713772	15	0.117049	0.117049	P36106	BYE1	Transcription factor BYE1	BYE1_YEAST	3	14.0147	1.14015	40 min	0 min
40 min / 0 min	P36107	P36107	0.0679702	0.0679702	0.633024	10	0.130586	0.130586	P36107	AUR1	Inositol phosphorylceramide synthase catalytic subunit AUR1	AUR1_YEAST	2	4.82408	1.04824	40 min	0 min
40 min / 0 min	P36108	P36108	0.0518281	0.0518281	0.682478	20	-0.0641758	0.0641758	P36108	DID4	DOA4-independent degradation protein 4	DID4_YEAST	3	3.65776	1.03658	40 min	0 min
40 min / 0 min	P36112	P36112	-0.140379	0.140379	0.624529	65	-0.0915845	0.0915845	P36112	MIC60	MICOS complex subunit MIC60	MIC60_YEAST	11	-9.27194	0.907281	40 min	0 min
40 min / 0 min	P36114	P36114	0.0927236	0.0927236	0.772591	95	0.0260087	0.0260087	P36114	YKR018C	Mitochondrial outer membrane protein YKR018C	YKR18_YEAST	18	6.63814	1.06638	40 min	0 min
40 min / 0 min	P36116	P36116	-0.446193	0.446193	0.709322	10	-0.578799	0.578799	P36116	VPS51	Vacuolar protein sorting-associated protein 51	VPS51_YEAST	2	-26.6023	0.733977	40 min	0 min
40 min / 0 min	P36117	P36117	-0.116566	0.116566	0.700252	10	-0.087271	0.087271	P36117	ALY1	Arrestin-related trafficking adapter 6	ALY1_YEAST	2	-7.76197	0.92238	40 min	0 min
40 min / 0 min	P36119	P36119	-0.121011	0.121011	0.611772	10	-0.10788	0.10788	P36119	YKR023W	Uncharacterized protein YKR023W	YK03_YEAST	2	-8.04569	0.919543	40 min	0 min
40 min / 0 min	P36120	P36120	0.0353112	0.0353112	0.625724	15	0.235393	0.235393	P36120	DBP7	ATP-dependent RNA helicase DBP7	DBP7_YEAST	3	2.47778	1.02478	40 min	0 min
40 min / 0 min	P36121	P36121	-0.106917	0.106917	0.340763	30	-0.253578	0.253578	P36121	RPC37	DNA-directed RNA polymerase III subunit RPC5	RPC5_YEAST	6	-7.14296	0.92857	40 min	0 min
40 min / 0 min	P36123	P36123	0.00131264	0.00131264	0.793858	50	-0.00876283	0.00876283	P36123	SAP190	SIT4-associating protein SAP190	SA190_YEAST	11	0.0910266	1.00091	40 min	0 min
40 min / 0 min	P36124	P36124	0.104059	0.104059	0.562024	15	0.454074	0.454074	P36124	SET3	SET domain-containing protein 3	SET3_YEAST	3	7.47932	1.07479	40 min	0 min
40 min / 0 min	P36126	P36126	0.0569508	0.0569508	0.698526	15	-0.116073	0.116073	P36126	SPO14	Phospholipase D1	SPO14_YEAST	3	4.02648	1.04026	40 min	0 min
40 min / 0 min	P36130	P36130	0.254516	0.254516	0.620712	15	0.247907	0.247907	P36130	CAF4	CCR4-associated factor 4	CAF4_YEAST	3	19.2935	1.19294	40 min	0 min
40 min / 0 min	P36131	P36131	-0.126488	0.126488	0.734117	10	-0.0645053	0.0645053	P36131	SPC34	DASH complex subunit SPC34	SPC34_YEAST	2	-8.3941	0.916059	40 min	0 min
40 min / 0 min	P36132	P36132	-0.0396629	0.0396629	0.676846	25	-0.0614335	0.0614335	P36132	KAE1	tRNA N6-adenosine threonylcarbamoyltransferase	KAE1_YEAST	5	-2.71178	0.972882	40 min	0 min
40 min / 0 min	P36135	P36135	0.194583	0.194583	0.751311	20	0.0444752	0.0444752	P36135	UTH1	Probable secreted beta-glucosidase UTH1	UTH1_YEAST	4	14.4393	1.14439	40 min	0 min
40 min / 0 min	P36136	P36136	-0.0423074	0.0423074	0.691921	70	-0.0653627	0.0653627	P36136	SHB17	Sedoheptulose 1,7-bisphosphatase	SHB17_YEAST	12	-2.88994	0.971101	40 min	0 min
40 min / 0 min	P36139	P36139	-0.10969	0.10969	0.36004	60	-0.328823	0.328823	P36139	PET10	Protein PET10	PET10_YEAST	10	-7.32131	0.926787	40 min	0 min
40 min / 0 min	P36141	P36141	0.0410085	0.0410085	0.565646	20	0.629007	0.629007	P36141	FMP46	Putative redox protein FMP46, mitochondrial	FMP46_YEAST	4	2.88327	1.02883	40 min	0 min
40 min / 0 min	P36144	P36144	-0.221207	0.221207	0.514657	10	-0.218028	0.218028	P36144	UTP30	Ribosome biogenesis protein UTP30	RL1D1_YEAST	2	-14.2152	0.857848	40 min	0 min
40 min / 0 min	P36145	P36145	-0.128438	0.128438	0.551309	40	-0.150289	0.150289	P36145	TFA2	Transcription initiation factor IIE subunit beta	T2EB_YEAST	7	-8.51784	0.914822	40 min	0 min
40 min / 0 min	P36147	P36147	0.506714	0.506714	0.627826	5	0.632442	0.632442	P36147	PAM17	Presequence translocated-associated motor subunit PAM17, mitochondrial	PAM17_YEAST	1	42.081	1.42081	40 min	0 min
40 min / 0 min	P36148	P36148	0.0708775	0.0708775	0.769438	50	0.0278891	0.0278891	P36148	GPT2	Glycerol-3-phosphate O-acyltransferase 2	GPT2_YEAST	10	5.03554	1.05036	40 min	0 min
40 min / 0 min	P36149	P36149	0.0322309	0.0322309	0.600904	15	-0.255251	0.255251	P36149	BET3	Trafficking protein particle complex subunit BET3	BET3_YEAST	3	2.25921	1.02259	40 min	0 min
40 min / 0 min	P36151	P36151	-0.0252632	0.0252632	0.65482	20	-0.0559391	0.0559391	P36151	YKR070W	Uncharacterized protein YKR070W	YK50_YEAST	4	-1.73587	0.982641	40 min	0 min
40 min / 0 min	P36152	P36152	-0.0328952	0.0328952	0.632373	60	0.0897614	0.0897614	P36152	DRE2	Fe-S cluster assembly protein DRE2	DRE2_YEAST	11	-2.25432	0.977457	40 min	0 min
40 min / 0 min	P36154	P36154	-0.0494066	0.0494066	0.756815	30	0.0277522	0.0277522	P36154	AIM29	Altered inheritance rate of mitochondria protein 29	AIM29_YEAST	4	-3.36663	0.966334	40 min	0 min
40 min / 0 min	P36158	P36158	-0.373275	0.373275	0.574438	5	-0.352936	0.352936	P36158	YKR078W	Uncharacterized protein YKR078W	YK58_YEAST	1	-22.7972	0.772028	40 min	0 min
40 min / 0 min	P36160	P36160	0.139643	0.139643	0.705635	25	-0.207099	0.207099	P36160	RPF2	Ribosome biogenesis protein RPF2	RPF2_YEAST	4	10.1632	1.10163	40 min	0 min
40 min / 0 min	P36161	P36161	-0.00569555	0.00569555	0.537638	110	0.179114	0.179114	P36161	NUP133	Nucleoporin NUP133	NU133_YEAST	22	-0.394007	0.99606	40 min	0 min
40 min / 0 min	P36162	P36162	-0.231309	0.231309	0.572014	10	-0.245734	0.245734	P36162	DAD2	DASH complex subunit DAD2	DAD2_YEAST	2	-14.8139	0.851861	40 min	0 min
40 min / 0 min	P36164	P36164	-0.196969	0.196969	0.519654	5	-0.205478	0.205478	P36164	TVP38	Golgi apparatus membrane protein TVP38	TVP38_YEAST	1	-12.7619	0.872381	40 min	0 min
40 min / 0 min	P36165	P36165	-0.0118155	0.0118155	0.610737	30	-0.0737432	0.0737432	P36165	TGL4	Lipase 4	TGL4_YEAST	6	-0.815647	0.991844	40 min	0 min
40 min / 0 min	P36166	P36166	-0.15922	0.15922	0.794755	15	0.0133404	0.0133404	P36166	PXL1	Paxillin-like protein 1	PXL1_YEAST	3	-10.4491	0.895509	40 min	0 min
40 min / 0 min	P36168	P36168	0.31896	0.31896	0.600904	10	0.517865	0.517865	P36168	ESL2	EST/SMG-like protein 1	ESL2_YEAST	2	24.7431	1.24743	40 min	0 min
40 min / 0 min	P36169	P36169	-0.104317	0.104317	0.743618	25	0.0459877	0.0459877	P36169	SKG1	Suppressor of lethality of KEX2 GAS1 double null mutant protein 1	SKG1_YEAST	5	-6.97548	0.930245	40 min	0 min
40 min / 0 min	P36421	P36421	-0.0196152	0.0196152	0.694643	145	0.0772629	0.0772629	P36421	TYS1	Tyrosine--tRNA ligase, cytoplasmic	SYYC_YEAST	22	-1.35042	0.986496	40 min	0 min
40 min / 0 min	P36516	P36516	-0.0577529	0.0577529	0.78135	45	-0.0265637	0.0265637	P36516	MRPL3	54S ribosomal protein L3, mitochondrial	RM03_YEAST	8	-3.92406	0.960759	40 min	0 min
40 min / 0 min	P36517	P36517	0.0354547	0.0354547	0.727605	25	-0.0577755	0.0577755	P36517	MRPL4	54S ribosomal protein L4, mitochondrial	RM04_YEAST	4	2.48798	1.02488	40 min	0 min
40 min / 0 min	P36519	P36519	-0.142101	0.142101	0.550129	15	-0.263444	0.263444	P36519	MRPL7	54S ribosomal protein L7, mitochondrial	RM07_YEAST	3	-9.38016	0.906198	40 min	0 min
40 min / 0 min	P36520	P36520	-0.155079	0.155079	0.506545	10	-0.139867	0.139867	P36520	MRPL10	54S ribosomal protein L10, mitochondrial	RM10_YEAST	2	-10.1917	0.898083	40 min	0 min
40 min / 0 min	P36521	P36521	-0.17364	0.17364	0.55047	10	-0.178243	0.178243	P36521	MRPL11	54S ribosomal protein L11, mitochondrial	RM11_YEAST	2	-11.3397	0.886603	40 min	0 min
40 min / 0 min	P36523	P36523	-0.0331034	0.0331034	0.601415	30	0.16362	0.16362	P36523	MRPL15	54S ribosomal protein L15, mitochondrial	RM15_YEAST	6	-2.26843	0.977316	40 min	0 min
40 min / 0 min	P36525	P36525	-0.0714121	0.0714121	0.677033	20	0.0960337	0.0960337	P36525	MRPL24	54S ribosomal protein L24, mitochondrial	RM24_YEAST	4	-4.8294	0.951706	40 min	0 min
40 min / 0 min	P36526	P36526	-0.0652909	0.0652909	0.753938	15	-0.0384442	0.0384442	P36526	MRPL27	54S ribosomal protein L27, mitochondrial	RM27_YEAST	3	-4.42474	0.955753	40 min	0 min
40 min / 0 min	P36527	P36527	0.0482974	0.0482974	0.747967	5	0.0555648	0.0555648	P36527	MRPL28	54S ribosomal protein L28, mitochondrial	RM28_YEAST	1	3.40439	1.03404	40 min	0 min
40 min / 0 min	P36528	P36528	-0.111077	0.111077	0.636409	15	-0.124823	0.124823	P36528	MRPL17	54S ribosomal protein L17, mitochondrial	RM17_YEAST	3	-7.41032	0.925897	40 min	0 min
40 min / 0 min	P36531	P36531	-0.214839	0.214839	0.694109	10	-0.11176	0.11176	P36531	MRPL36	54S ribosomal protein L36, mitochondrial	RM36_YEAST	2	-13.8358	0.861642	40 min	0 min
40 min / 0 min	P36532	P36532	-0.241661	0.241661	0.60703	5	-0.255833	0.255833	P36532	MRPL37	54S ribosomal protein L37, mitochondrial	RM37_YEAST	1	-15.4229	0.845771	40 min	0 min
40 min / 0 min	P36533	P36533	-0.284654	0.284654	0.341075	5	-0.285593	0.285593	P36533	MRPL39	54S ribosomal protein L39, mitochondrial	RM39_YEAST	1	-17.9062	0.820938	40 min	0 min
40 min / 0 min	P36534	P36534	0.0271093	0.0271093	0.796012	20	-0.00222851	0.00222851	P36534	MRPL40	54S ribosomal protein L40, mitochondrial	RM40_YEAST	4	1.89684	1.01897	40 min	0 min
40 min / 0 min	P36775	P36775	0.0460771	0.0460771	0.721973	115	-0.0700809	0.0700809	P36775	PIM1	Lon protease homolog, mitochondrial	LONM_YEAST	22	3.24537	1.03245	40 min	0 min
40 min / 0 min	P36973	P36973	-0.0125951	0.0125951	0.801039	10	-0.000149705	0.000149705	P36973	APT2	Adenine phosphoribosyltransferase 2	APT2_YEAST	2	-0.869224	0.991308	40 min	0 min
40 min / 0 min	P37012	P37012	-0.0794625	0.0794625	0.568973	105	0.224468	0.224468	P37012	PGM2	Phosphoglucomutase 2	PGM2_YEAST	20	-5.35898	0.94641	40 min	0 min
40 min / 0 min	P37020	P37020	0.30558	0.30558	0.651139	5	0.354231	0.354231	P37020	GEF1	Anion/proton exchange transporter GEF1	GEF1_YEAST	1	23.5915	1.23592	40 min	0 min
40 min / 0 min	P37254	P37254	0.122245	0.122245	0.612351	15	0.911491	0.911491	P37254	ABZ1	Aminodeoxychorismate synthase	PABS_YEAST	3	8.84271	1.08843	40 min	0 min
40 min / 0 min	P37262	P37262	-0.0758195	0.0758195	0.791827	65	-0.00888616	0.00888616	P37262	SOL2	6-phosphogluconolactonase-like protein 2	SOL2_YEAST	13	-5.1197	0.948803	40 min	0 min
40 min / 0 min	P37263	P37263	-0.0919307	0.0919307	0.752825	30	-0.0308665	0.0308665	P37263	YCR087C-A	UPF0743 protein YCR087C-A	YC16_YEAST	6	-6.17338	0.938266	40 min	0 min
40 min / 0 min	P37291	P37291	0.136544	0.136544	0.101415	295	0.116506	0.116506	P37291	SHM2	Serine hydroxymethyltransferase, cytosolic	GLYC_YEAST	35	9.92688	1.09927	40 min	0 min
40 min / 0 min	P37292	P37292	0.149819	0.149819	0.562417	155	0.0925913	0.0925913	P37292	SHM1	Serine hydroxymethyltransferase, mitochondrial	GLYM_YEAST	24	10.943	1.10943	40 min	0 min
40 min / 0 min	P37293	P37293	0.779804	0.779804	0.517418	5	0.99845	0.99845	P37293	NAT2	N-terminal acetyltransferase 2	NAT2_YEAST	1	71.6898	1.7169	40 min	0 min
40 min / 0 min	P37296	P37296	-0.0350956	0.0350956	0.599576	30	0.186111	0.186111	P37296	STV1	V-type proton ATPase subunit a, Golgi isoform	STV1_YEAST	6	-2.40329	0.975967	40 min	0 min
40 min / 0 min	P37297	P37297	-0.0861303	0.0861303	0.618277	75	0.104711	0.104711	P37297	STT4	Phosphatidylinositol 4-kinase STT4	STT4_YEAST	15	-5.79538	0.942046	40 min	0 min
40 min / 0 min	P37298	P37298	-0.255035	0.255035	0.604275	5	-0.48904	0.48904	P37298	SDH4	Succinate dehydrogenase [ubiquinone] cytochrome b small subunit, mitochondrial	DHSD_YEAST	1	-16.2033	0.837967	40 min	0 min
40 min / 0 min	P37299	P37299	0.173275	0.173275	0.797131	10	0.0217729	0.0217729	P37299	QCR10	Cytochrome b-c1 complex subunit 10	QCR10_YEAST	2	12.7616	1.12762	40 min	0 min
40 min / 0 min	P37302	P37302	0.00773201	0.00773201	0.633006	95	-0.0641498	0.0641498	P37302	APE3	Aminopeptidase Y	APE3_YEAST	16	0.537381	1.00537	40 min	0 min
40 min / 0 min	P37303	P37303	-0.175412	0.175412	0.581749	115	-0.0789154	0.0789154	P37303	GLY1	Low specificity L-threonine aldolase	GLY1_YEAST	15	-11.4486	0.885514	40 min	0 min
40 min / 0 min	P37304	P37304	-0.0610266	0.0610266	0.394141	45	-0.144688	0.144688	P37304	PAM1	Protein PAM1	PAM1_YEAST	9	-4.14182	0.958582	40 min	0 min
40 min / 0 min	P37366	P37366	-0.0770489	0.0770489	0.645316	10	-0.101421	0.101421	P37366	CCL1	Cyclin CCL1	CCL1_YEAST	2	-5.20052	0.947995	40 min	0 min
40 min / 0 min	P37370	P37370	-0.0152099	0.0152099	0.608475	20	-0.146114	0.146114	P37370	VRP1	Verprolin	VRP1_YEAST	4	-1.04873	0.989513	40 min	0 min
40 min / 0 min	P37838	P37838	0.151717	0.151717	0.462823	80	0.10531	0.10531	P37838	NOP4	Nucleolar protein 4	NOP4_YEAST	15	11.089	1.11089	40 min	0 min
40 min / 0 min	P37898	P37898	-0.0171947	0.0171947	0.130853	150	-0.161352	0.161352	P37898	AAP1	Alanine/arginine aminopeptidase	AAP1_YEAST	26	-1.18477	0.988152	40 min	0 min
40 min / 0 min	P38009	P38009	0.0166299	0.0166299	0.77818	245	0.00681203	0.00681203	P38009	ADE17	Bifunctional purine biosynthesis protein ADE17	PUR92_YEAST	36	1.15937	1.01159	40 min	0 min
40 min / 0 min	P38011	P38011	-0.0558938	0.0558938	0.63375	115	0.159038	0.159038	P38011	ASC1	Guanine nucleotide-binding protein subunit beta-like protein	GBLP_YEAST	15	-3.80017	0.961998	40 min	0 min
40 min / 0 min	P38013	P38013	-0.108933	0.108933	0.670541	85	-0.0447964	0.0447964	P38013	AHP1	Peroxiredoxin type-2	AHP1_YEAST	13	-7.27267	0.927273	40 min	0 min
40 min / 0 min	P38041	P38041	0.0357831	0.0357831	0.578683	35	0.134828	0.134828	P38041	BOI1	Protein BOB1	BOB1_YEAST	7	2.51131	1.02511	40 min	0 min
40 min / 0 min	P38061	P38061	-0.0661309	0.0661309	0.65236	50	0.0357292	0.0357292	P38061	RPL32	60S ribosomal protein L32	RL32_YEAST	7	-4.48038	0.955196	40 min	0 min
40 min / 0 min	P38063	P38063	-0.0799993	0.0799993	0.705947	50	-0.0641883	0.0641883	P38063	PRS4	Ribose-phosphate pyrophosphokinase 4	KPR4_YEAST	8	-5.39419	0.946058	40 min	0 min
40 min / 0 min	P38064	P38064	0.264236	0.264236	0.545401	15	0.211695	0.211695	P38064	MRPL16	54S ribosomal protein L16, mitochondrial	RM16_YEAST	3	20.1	1.201	40 min	0 min
40 min / 0 min	P38065	P38065	-0.219771	0.219771	0.627924	35	-0.0946555	0.0946555	P38065	APL3	AP-2 complex subunit alpha	AP2A_YEAST	7	-14.1298	0.858702	40 min	0 min
40 min / 0 min	P38066	P38066	0.0593403	0.0593403	0.563715	30	0.216048	0.216048	P38066	RIB1	GTP cyclohydrolase-2	RIB1_YEAST	6	4.19892	1.04199	40 min	0 min
40 min / 0 min	P38067	P38067	-0.339996	0.339996	0.76037	20	-0.0452941	0.0452941	P38067	UGA2	Succinate-semialdehyde dehydrogenase [NADP(+)]	UGA2_YEAST	4	-20.9956	0.790044	40 min	0 min
40 min / 0 min	P38068	P38068	0.314701	0.314701	0.746678	20	-0.068502	0.068502	P38068	GRX7	Monothiol glutaredoxin-7	GLRX7_YEAST	4	24.3754	1.24375	40 min	0 min
40 min / 0 min	P38069	P38069	0.0528426	0.0528426	0.775158	60	-0.00916101	0.00916101	P38069	MNN2	Alpha-1,2-mannosyltransferase MNN2	MNN2_YEAST	12	3.73068	1.03731	40 min	0 min
40 min / 0 min	P38070	P38070	0.312316	0.312316	0.554975	5	0.327632	0.327632	P38070	YPK3	AGC kinase YPK3	YPK3_YEAST	1	24.1699	1.2417	40 min	0 min
40 min / 0 min	P38071	P38071	-0.00967911	0.00967911	0.701844	70	0.0355991	0.0355991	P38071	ETR1	Enoyl-[acyl-carrier protein] reductase [NADPH, B-specific], mitochondrial	ETR1_YEAST	10	-0.668659	0.993313	40 min	0 min
40 min / 0 min	P38072	P38072	-0.136494	0.136494	0.670541	10	-0.165161	0.165161	P38072	SCO2	Protein SCO2, mitochondrial	SCO2_YEAST	2	-9.02725	0.909727	40 min	0 min
40 min / 0 min	P38074	P38074	-0.117965	0.117965	0.708161	35	-0.0937702	0.0937702	P38074	HMT1	Protein arginine N-methyltransferase 1	HMT1_YEAST	6	-7.85137	0.921486	40 min	0 min
40 min / 0 min	P38075	P38075	-0.128008	0.128008	0.439075	95	-0.135112	0.135112	P38075	PDX3	Pyridoxamine 5'-phosphate oxidase	PDX3_YEAST	16	-8.49058	0.915094	40 min	0 min
40 min / 0 min	P38077	P38077	0.0350285	0.0350285	0.270733	85	0.170955	0.170955	P38077	ATP3	ATP synthase subunit gamma, mitochondrial	ATPG_YEAST	14	2.4577	1.02458	40 min	0 min
40 min / 0 min	P38079	P38079	-0.0644617	0.0644617	0.705232	5	-0.068462	0.068462	P38079	YRO2	Protein YRO2	YRO2_YEAST	1	-4.36979	0.956302	40 min	0 min
40 min / 0 min	P38080	P38080	0.00852052	0.00852052	0.602791	50	0.152211	0.152211	P38080	AKL1	Serine/threonine-protein kinase AKL1	AKL1_YEAST	9	0.592345	1.00592	40 min	0 min
40 min / 0 min	P38081	P38081	-0.0203762	0.0203762	0.60789	65	-0.0917731	0.0917731	P38081	YBR056W	Uncharacterized glycosyl hydrolase YBR056W	YBQ6_YEAST	12	-1.40245	0.985976	40 min	0 min
40 min / 0 min	P38084	P38084	-0.136937	0.136937	0.289739	50	-0.344988	0.344988	P38084	BAP2	Leu/Val/Ile amino-acid permease	BAP2_YEAST	10	-9.05518	0.909448	40 min	0 min
40 min / 0 min	P38085	P38085	0.0410468	0.0410468	0.784667	35	0.0113738	0.0113738	P38085	TAT1	Valine/tyrosine/tryptophan amino-acid permease 1	TAT1_YEAST	7	2.88601	1.02886	40 min	0 min
40 min / 0 min	P38086	P38086	0.32591	0.32591	0.639498	35	0.143053	0.143053	P38086	RDH54	DNA repair and recombination protein RDH54	RDH54_YEAST	7	25.3455	1.25346	40 min	0 min
40 min / 0 min	P38087	P38087	-0.193585	0.193585	0.317289	25	-0.27129	0.27129	P38087	YMC2	Carrier protein YMC2, mitochondrial	YMC2_YEAST	5	-12.557	0.87443	40 min	0 min
40 min / 0 min	P38088	P38088	0.217677	0.217677	0.406615	290	0.133159	0.133159	P38088	GRS1	Glycine--tRNA ligase 1, mitochondrial	SYG_YEAST	42	16.286	1.16286	40 min	0 min
40 min / 0 min	P38089	P38089	-0.0885632	0.0885632	0.596135	15	-0.21809	0.21809	P38089	PTC4	Protein phosphatase 2C homolog 4	PP2C4_YEAST	3	-5.95411	0.940459	40 min	0 min
40 min / 0 min	P38090	P38090	0.369853	0.369853	0.571069	5	4.38563	4.38563	P38090	AGP2	General amino acid permease AGP2	AGP2_YEAST	1	29.2221	1.29222	40 min	0 min
40 min / 0 min	P38109	P38109	-0.0720582	0.0720582	0.783165	35	-0.0120447	0.0120447	P38109	YBR139W	Putative serine carboxypeptidase YBR139W	YBY9_YEAST	6	-4.87201	0.95128	40 min	0 min
40 min / 0 min	P38112	P38112	0.0226255	0.0226255	0.752056	80	-0.0253538	0.0253538	P38112	MAK5	ATP-dependent RNA helicase MAK5	MAK5_YEAST	14	1.58064	1.01581	40 min	0 min
40 min / 0 min	P38113	P38113	-0.0383893	0.0383893	0.784036	80	0.0183401	0.0183401	P38113	ADH5	Alcohol dehydrogenase 5	ADH5_YEAST	12	-2.62585	0.973742	40 min	0 min
40 min / 0 min	P38115	P38115	0.0040328	0.0040328	0.720954	125	-0.0537981	0.0537981	P38115	ARA1	D-arabinose dehydrogenase [NAD(P)+] heavy chain	ARA1_YEAST	19	0.279923	1.0028	40 min	0 min
40 min / 0 min	P38116	P38116	-0.103411	0.103411	0.279748	30	-0.10711	0.10711	P38116	ARL1	ADP-ribosylation factor-like protein 1	ARL1_YEAST	6	-6.91705	0.930829	40 min	0 min
40 min / 0 min	P38120	P38120	0.0960826	0.0960826	0.743953	5	0.0851385	0.0851385	P38120	MRPS9	37S ribosomal protein S9, mitochondrial	RT09_YEAST	1	6.88672	1.06887	40 min	0 min
40 min / 0 min	P38121	P38121	0.0986131	0.0986131	0.742905	30	-0.0369772	0.0369772	P38121	POL12	DNA polymerase alpha subunit B	DPOA2_YEAST	6	7.07437	1.07074	40 min	0 min
40 min / 0 min	P38122	P38122	-0.150934	0.150934	0.797626	20	0.00723966	0.00723966	P38122	ECM31	3-methyl-2-oxobutanoate hydroxymethyltransferase	PANB_YEAST	3	-9.93328	0.900667	40 min	0 min
40 min / 0 min	P38127	P38127	-0.0327173	0.0327173	0.590863	15	0.244867	0.244867	P38127	RIM2	Mitochondrial carrier protein RIM2	RIM2_YEAST	3	-2.24227	0.977577	40 min	0 min
40 min / 0 min	P38129	P38129	-0.0216735	0.0216735	0.675265	90	-0.0857452	0.0857452	P38129	TAF5	Transcription initiation factor TFIID subunit 5	TAF5_YEAST	17	-1.49106	0.985089	40 min	0 min
40 min / 0 min	P38130	P38130	-0.0410887	0.0410887	0.754513	70	-0.019894	0.019894	P38130	KTR3	Probable mannosyltransferase KTR3	KTR3_YEAST	11	-2.80787	0.971921	40 min	0 min
40 min / 0 min	P38131	P38131	0.0513301	0.0513301	0.585012	55	0.109047	0.109047	P38131	KTR4	Probable mannosyltransferase KTR4	KTR4_YEAST	11	3.62199	1.03622	40 min	0 min
40 min / 0 min	P38132	P38132	0.139445	0.139445	0.739754	35	-0.0574921	0.0574921	P38132	MCM7	DNA replication licensing factor MCM7	MCM7_YEAST	7	10.1481	1.10148	40 min	0 min
40 min / 0 min	P38137	P38137	0.111813	0.111813	0.796012	60	-0.00353965	0.00353965	P38137	PCS60	Peroxisomal-coenzyme A synthetase	FAT2_YEAST	12	8.05853	1.08059	40 min	0 min
40 min / 0 min	P38138	P38138	-1.17437	1.17437	0.761258	60	-0.0381651	0.0381651	P38138	ROT2	Glucosidase 2 subunit alpha	GLU2A_YEAST	11	-55.6922	0.443078	40 min	0 min
40 min / 0 min	P38139	P38139	-0.108018	0.108018	0.767511	20	0.121448	0.121448	P38139	LDH1	Lipid droplet hydrolase 1	LDH1_YEAST	4	-7.21383	0.927862	40 min	0 min
40 min / 0 min	P38143	P38143	0.0511479	0.0511479	0.674441	65	-0.0635185	0.0635185	P38143	GPX2	Glutathione peroxidase 2	GPX2_YEAST	12	3.60889	1.03609	40 min	0 min
40 min / 0 min	P38144	P38144	-0.00780516	0.00780516	0.552273	150	-0.147926	0.147926	P38144	ISW1	ISWI chromatin-remodeling complex ATPase ISW1	ISW1_YEAST	26	-0.539552	0.994604	40 min	0 min
40 min / 0 min	P38145	P38145	-0.182094	0.182094	0.742096	55	-0.0396767	0.0396767	P38145	RIB5	Riboflavin synthase	RISA_YEAST	8	-11.8577	0.881423	40 min	0 min
40 min / 0 min	P38146	P38146	-0.162549	0.162549	0.373928	15	-0.206429	0.206429	P38146	YPT10	GTP-binding protein YPT10	YPT10_YEAST	3	-10.6555	0.893445	40 min	0 min
40 min / 0 min	P38147	P38147	0.0186949	0.0186949	0.722737	5	-0.0529192	0.0529192	P38147	CHK1	Serine/threonine-protein kinase CHK1	CHK1_YEAST	1	1.30426	1.01304	40 min	0 min
40 min / 0 min	P38149	P38149	0.156341	0.156341	0.780593	10	0.122533	0.122533	P38149	DUG2	Probable di- and tripeptidase DUG2	DUG2_YEAST	2	11.4457	1.11446	40 min	0 min
40 min / 0 min	P38151	P38151	0.188447	0.188447	0.568572	5	0.18408	0.18408	P38151	PBP2	PAB1-binding protein 2	PBP2_YEAST	1	13.9536	1.13954	40 min	0 min
40 min / 0 min	P38152	P38152	-0.0123279	0.0123279	0.607919	65	-0.0841148	0.0841148	P38152	CTP1	Tricarboxylate transport protein	TXTP_YEAST	12	-0.850866	0.991491	40 min	0 min
40 min / 0 min	P38153	P38153	-0.199615	0.199615	0.375032	30	-0.173778	0.173778	P38153	APM3	AP-3 complex subunit mu	AP3M_YEAST	6	-12.9217	0.870783	40 min	0 min
40 min / 0 min	P38162	P38162	-0.186707	0.186707	0.199004	20	-0.24018	0.24018	P38162	MIX23	Mitochondrial intermembrane space cysteine motif-containing protein MIX23	MIX23_YEAST	4	-12.1391	0.878609	40 min	0 min
40 min / 0 min	P38164	P38164	-0.0462603	0.0462603	0.780198	25	0.0102781	0.0102781	P38164	SEA4	SEH-associated protein 4	SEA4_YEAST	5	-3.15566	0.968443	40 min	0 min
40 min / 0 min	P38165	P38165	-0.0668096	0.0668096	0.672267	10	-0.0608382	0.0608382	P38165	RTG3	Retrograde regulation protein 3	RTG3_YEAST	2	-4.5253	0.954747	40 min	0 min
40 min / 0 min	P38166	P38166	-0.144049	0.144049	0.503379	25	-0.26278	0.26278	P38166	SFT2	Protein transport protein SFT2	SFT2_YEAST	4	-9.5024	0.904976	40 min	0 min
40 min / 0 min	P38167	P38167	0.0615141	0.0615141	0.76231	35	-0.0959569	0.0959569	P38167	ECM21	Protein ECM21	ECM21_YEAST	7	4.35604	1.04356	40 min	0 min
40 min / 0 min	P38169	P38169	-0.0225035	0.0225035	0.778902	30	-0.0268672	0.0268672	P38169	BNA4	Kynurenine 3-monooxygenase	KMO_YEAST	6	-1.54772	0.984523	40 min	0 min
40 min / 0 min	P38170	P38170	-0.156828	0.156828	0.616383	15	-0.109067	0.109067	P38170	BRN1	Condensin complex subunit 2	CND2_YEAST	3	-10.3005	0.896995	40 min	0 min
40 min / 0 min	P38172	P38172	-0.0444088	0.0444088	0.774027	5	-0.0732095	0.0732095	P38172	YBL095W	Uncharacterized protein YBL095W, mitochondrial	YBJ5_YEAST	1	-3.03129	0.969687	40 min	0 min
40 min / 0 min	P38174	P38174	0.105994	0.105994	0.699799	130	0.0340271	0.0340271	P38174	MAP2	Methionine aminopeptidase 2	MAP2_YEAST	17	7.62354	1.07624	40 min	0 min
40 min / 0 min	P38177	P38177	0.246397	0.246397	0.751035	15	0.0932919	0.0932919	P38177	YBL086C	Uncharacterized protein YBL086C	YBI6_YEAST	3	18.6241	1.18624	40 min	0 min
40 min / 0 min	P38180	P38180	-0.223553	0.223553	0.646958	5	-0.214843	0.214843	P38180	YBL081W	Uncharacterized protein YBL081W	YBI1_YEAST	1	-14.3546	0.856454	40 min	0 min
40 min / 0 min	P38181	P38181	0.0235372	0.0235372	0.581749	75	0.060009	0.060009	P38181	NUP170	Nucleoporin NUP170	NU170_YEAST	15	1.64485	1.01645	40 min	0 min
40 min / 0 min	P38187	P38187	-0.393273	0.393273	0.54475	25	-0.427025	0.427025	P38187	UBP13	Ubiquitin carboxyl-terminal hydrolase 13	UBP13_YEAST	5	-23.8599	0.761401	40 min	0 min
40 min / 0 min	P38193	P38193	0.00966958	0.00966958	0.724591	20	0.0364829	0.0364829	P38193	PSY4	Serine/threonine-protein phosphatase 4 regulatory subunit 2	PP4R2_YEAST	4	0.672495	1.00672	40 min	0 min
40 min / 0 min	P38196	P38196	-0.387486	0.387486	0.325531	10	-0.409255	0.409255	P38196	FUI1	Uridine permease	FUI1_YEAST	2	-23.5539	0.764461	40 min	0 min
40 min / 0 min	P38197	P38197	0.109363	0.109363	0.602791	75	0.113463	0.113463	P38197	YBL036C	UPF0001 protein YBL036C	YBD6_YEAST	12	7.87521	1.07875	40 min	0 min
40 min / 0 min	P38199	P38199	0.0341989	0.0341989	0.720001	60	0.073583	0.073583	P38199	HEK2	Heterogeneous nuclear rnp K-like protein 2	HEK2_YEAST	9	2.39881	1.02399	40 min	0 min
40 min / 0 min	P38203	P38203	-0.181379	0.181379	0.207569	25	-0.479663	0.479663	P38203	LSM2	U6 snRNA-associated Sm-like protein LSm2	LSM2_YEAST	4	-11.8141	0.881859	40 min	0 min
40 min / 0 min	P38205	P38205	-0.0709233	0.0709233	0.585078	225	-0.0531605	0.0531605	P38205	NCL1	Multisite-specific tRNA:(cytosine-C(5))-methyltransferase	NCL1_YEAST	35	-4.79715	0.952029	40 min	0 min
40 min / 0 min	P38206	P38206	-0.00154768	0.00154768	0.792153	5	0.00662838	0.00662838	P38206	RFT1	Oligosaccharide translocation protein RFT1	RFT1_YEAST	1	-0.107219	0.998928	40 min	0 min
40 min / 0 min	P38208	P38208	0.138295	0.138295	0.638065	5	0.126071	0.126071	P38208	POP8	Ribonucleases P/MRP protein subunit POP8	POP8_YEAST	1	10.0603	1.1006	40 min	0 min
40 min / 0 min	P38212	P38212	0.327415	0.327415	0.771795	5	0.237399	0.237399	P38212	RCR1	Protein RCR1	RCR1_YEAST	1	25.4763	1.25476	40 min	0 min
40 min / 0 min	P38216	P38216	0.361383	0.361383	0.769793	10	-0.227375	0.227375	P38216	YBR016W	Uncharacterized protein YBR016W	YBM6_YEAST	1	28.4657	1.28466	40 min	0 min
40 min / 0 min	P38217	P38217	0.0547746	0.0547746	0.785553	70	-0.0094309	0.0094309	P38217	KAP104	Importin subunit beta-2	IMB2_YEAST	13	3.86968	1.0387	40 min	0 min
40 min / 0 min	P38218	P38218	-0.0537203	0.0537203	0.61835	5	-0.0571293	0.0571293	P38218	POA1	ADP-ribose 1''-phosphate phosphatase	POA1_YEAST	1	-3.65513	0.963449	40 min	0 min
40 min / 0 min	P38219	P38219	0.0814111	0.0814111	0.581812	245	0.074099	0.074099	P38219	OLA1	Obg-like ATPase 1	OLA1_YEAST	34	5.80524	1.05805	40 min	0 min
40 min / 0 min	P38221	P38221	0.144094	0.144094	0.507128	30	0.647215	0.647215	P38221	CDS1	Phosphatidate cytidylyltransferase	CDS1_YEAST	6	10.5037	1.10504	40 min	0 min
40 min / 0 min	P38222	P38222	0.0609492	0.0609492	0.669698	10	0.0692369	0.0692369	P38222	RKM3	Ribosomal lysine N-methyltransferase 3	RKM3_YEAST	2	4.31519	1.04315	40 min	0 min
40 min / 0 min	P38225	P38225	0.0571374	0.0571374	0.743142	40	-0.0538861	0.0538861	P38225	FAT1	Very long-chain fatty acid transport protein	FAT1_YEAST	8	4.03993	1.0404	40 min	0 min
40 min / 0 min	P38226	P38226	-0.139829	0.139829	0.734836	25	-0.0852895	0.0852895	P38226	CST26	Uncharacterized acyltransferase CST26	CST26_YEAST	5	-9.23731	0.907627	40 min	0 min
40 min / 0 min	P38227	P38227	-0.107889	0.107889	0.603313	5	-0.111784	0.111784	P38227	QDR3	Quinidine resistance protein 3	QDR3_YEAST	1	-7.2055	0.927945	40 min	0 min
40 min / 0 min	P38228	P38228	-0.0136182	0.0136182	0.728844	10	-0.0862072	0.0862072	P38228	TCM62	Mitochondrial chaperone TCM62	TCM62_YEAST	2	-0.939498	0.990605	40 min	0 min
40 min / 0 min	P38230	P38230	-0.138997	0.138997	0.339179	45	-0.227779	0.227779	P38230	ZTA1	Probable quinone oxidoreductase	QOR_YEAST	9	-9.18499	0.90815	40 min	0 min
40 min / 0 min	P38234	P38234	-0.098601	0.098601	0.624056	30	-0.0680807	0.0680807	P38234	RFS1	Protein RFS1	RFS1_YEAST	5	-6.60618	0.933938	40 min	0 min
40 min / 0 min	P38235	P38235	-0.153202	0.153202	0.468006	15	-0.203052	0.203052	P38235	YBR053C	Uncharacterized protein YBR053C	YBQ3_YEAST	3	-10.0748	0.899252	40 min	0 min
40 min / 0 min	P38237	P38237	0.00229669	0.00229669	0.509395	50	-0.297237	0.297237	P38237	UBP14	Ubiquitin carboxyl-terminal hydrolase 14	UBP14_YEAST	10	0.159321	1.00159	40 min	0 min
40 min / 0 min	P38238	P38238	-0.144618	0.144618	0.551236	20	-0.250953	0.250953	P38238	TRM7	tRNA (cytidine(32)/guanosine(34)-2'-O)-methyltransferase	TRM7_YEAST	4	-9.53812	0.904619	40 min	0 min
40 min / 0 min	P38239	P38239	-0.362779	0.362779	0.62327	5	-0.312662	0.312662	P38239	YBR062C	Uncharacterized RING finger protein YBR062C	YBR2_YEAST	1	-22.2335	0.777665	40 min	0 min
40 min / 0 min	P38241	P38241	0.112184	0.112184	0.676363	5	0.129917	0.129917	P38241	ECM2	Pre-mRNA-splicing factor SLT11	SLT11_YEAST	1	8.08634	1.08086	40 min	0 min
40 min / 0 min	P38242	P38242	-0.287176	0.287176	0.624056	5	-0.370286	0.370286	P38242	ALG14	UDP-N-acetylglucosamine transferase subunit ALG14	ALG14_YEAST	1	-18.0495	0.819505	40 min	0 min
40 min / 0 min	P38244	P38244	-0.109958	0.109958	0.76891	35	-0.0193934	0.0193934	P38244	PFF1	Vacuolar membrane protease	PFF1_YEAST	7	-7.33852	0.926615	40 min	0 min
40 min / 0 min	P38247	P38247	-0.151013	0.151013	0.574011	15	-0.116983	0.116983	P38247	SLM4	Protein SLM4	SLM4_YEAST	3	-9.93822	0.900618	40 min	0 min
40 min / 0 min	P38248	P38248	0.0607125	0.0607125	0.717768	40	0.0605222	0.0605222	P38248	ECM33	Cell wall protein ECM33	ECM33_YEAST	6	4.29807	1.04298	40 min	0 min
40 min / 0 min	P38249	P38249	0.0518011	0.0518011	0.794655	325	-0.00254742	0.00254742	P38249	RPG1	Eukaryotic translation initiation factor 3 subunit A	EIF3A_YEAST	53	3.65582	1.03656	40 min	0 min
40 min / 0 min	P38250	P38250	0.0641192	0.0641192	0.771984	70	-0.0319477	0.0319477	P38250	IST2	Increased sodium tolerance protein 2	IST2_YEAST	14	4.54465	1.04545	40 min	0 min
40 min / 0 min	P38251	P38251	0.114492	0.114492	0.497585	50	0.366299	0.366299	P38251	RFC5	Replication factor C subunit 5	RFC5_YEAST	9	8.25936	1.08259	40 min	0 min
40 min / 0 min	P38254	P38254	-0.0122984	0.0122984	0.768552	50	0.0213989	0.0213989	P38254	PBY1	Probable tubulin--tyrosine ligase PBY1	TTL_YEAST	10	-0.84884	0.991512	40 min	0 min
40 min / 0 min	P38255	P38255	0.0463457	0.0463457	0.761209	20	-0.0198364	0.0198364	P38255	RXT2	Transcriptional regulatory protein RXT2	RXT2_YEAST	5	3.26459	1.03265	40 min	0 min
40 min / 0 min	P38256	P38256	-0.0763812	0.0763812	0.654393	15	0.100164	0.100164	P38256	YBR096W	Uncharacterized protein YBR096W	YBU6_YEAST	3	-5.15663	0.948434	40 min	0 min
40 min / 0 min	P38260	P38260	-0.211029	0.211029	0.548655	80	-0.159147	0.159147	P38260	FES1	Hsp70 nucleotide exchange factor FES1	FES1_YEAST	13	-13.6079	0.863921	40 min	0 min
40 min / 0 min	P38261	P38261	-0.0774647	0.0774647	0.530427	35	-0.221549	0.221549	P38261	EXO84	Exocyst complex component EXO84	EXO84_YEAST	7	-5.22784	0.947722	40 min	0 min
40 min / 0 min	P38262	P38262	0.0693983	0.0693983	0.551738	20	0.815351	0.815351	P38262	SIF2	SIR4-interacting protein SIF2	SIF2_YEAST	3	4.9279	1.04928	40 min	0 min
40 min / 0 min	P38264	P38264	-0.00283525	0.00283525	0.574011	60	-0.10355	0.10355	P38264	PHO88	Inorganic phosphate transport protein PHO88	PHO88_YEAST	8	-0.196332	0.998037	40 min	0 min
40 min / 0 min	P38266	P38266	-0.0196023	0.0196023	0.790923	5	0.0190633	0.0190633	P38266	AIM3	Altered inheritance of mitochondria protein 3	AIM3_YEAST	1	-1.34954	0.986505	40 min	0 min
40 min / 0 min	P38271	P38271	0.853663	0.853663	0.71782	5	0.165119	0.165119	P38271	OPY1	Protein OPY1	OPY1_YEAST	1	80.7083	1.80708	40 min	0 min
40 min / 0 min	P38272	P38272	0.0457429	0.0457429	0.613978	25	0.158338	0.158338	P38272	SHE3	SWI5-dependent HO expression protein 3	SHE3_YEAST	5	3.22146	1.03221	40 min	0 min
40 min / 0 min	P38273	P38273	-0.190327	0.190327	0.662424	5	-0.527763	0.527763	P38273	CCZ1	Vacuolar fusion protein CCZ1	CCZ1_YEAST	1	-12.3593	0.876407	40 min	0 min
40 min / 0 min	P38274	P38274	0.0764581	0.0764581	0.749502	15	0.0355391	0.0355391	P38274	HSL7	Protein arginine N-methyltransferase HSL7	HSL7_YEAST	4	5.44262	1.05443	40 min	0 min
40 min / 0 min	P38276	P38276	0.024659	0.024659	0.696585	25	-0.0777863	0.0777863	P38276	YBR137W	UPF0303 protein YBR137W	YBY7_YEAST	5	1.72392	1.01724	40 min	0 min
40 min / 0 min	P38281	P38281	0.0932187	0.0932187	0.771651	40	-0.0116255	0.0116255	P38281	APD1	Actin patches distal protein 1	APD1_YEAST	6	6.67475	1.06675	40 min	0 min
40 min / 0 min	P38286	P38286	0.0334873	0.0334873	0.551309	60	0.571598	0.571598	P38286	IFA38	Very-long-chain 3-oxoacyl-CoA reductase	MKAR_YEAST	10	2.34831	1.02348	40 min	0 min
40 min / 0 min	P38288	P38288	0.0713358	0.0713358	0.67053	30	0.109508	0.109508	P38288	TOS1	Protein TOS1	TOS1_YEAST	5	5.06891	1.05069	40 min	0 min
40 min / 0 min	P38295	P38295	0.0263418	0.0263418	0.612746	130	-0.0714244	0.0714244	P38295	EHT1	Medium-chain fatty acid ethyl ester synthase/esterase 2	MCFS2_YEAST	20	1.84265	1.01843	40 min	0 min
40 min / 0 min	P38300	P38300	0.0420375	0.0420375	0.735191	5	0.150265	0.150265	P38300	MBA1	Inner membrane mitoribosome receptor MBA1, mitochondrial	MBA1_YEAST	1	2.95668	1.02957	40 min	0 min
40 min / 0 min	P38302	P38302	-0.177518	0.177518	0.554194	10	-0.287661	0.287661	P38302	NTC20	Pre-mRNA-splicing factor NTC20	NTC20_YEAST	2	-11.5777	0.884223	40 min	0 min
40 min / 0 min	P38304	P38304	-0.137431	0.137431	0.607957	5	-0.131497	0.131497	P38304	MED8	Mediator of RNA polymerase II transcription subunit 8	MED8_YEAST	1	-9.08635	0.909137	40 min	0 min
40 min / 0 min	P38306	P38306	-0.207223	0.207223	0.607374	10	-0.166322	0.166322	P38306	YBR197C	Uncharacterized protein YBR197C	YB47_YEAST	2	-13.3797	0.866203	40 min	0 min
40 min / 0 min	P38310	P38310	-0.225804	0.225804	0.715759	5	-0.222035	0.222035	P38310	FTH1	Iron transporter FTH1	FTH1_YEAST	1	-14.4882	0.855118	40 min	0 min
40 min / 0 min	P38313	P38313	-0.300284	0.300284	0.767183	10	-0.124222	0.124222	P38313	AME1	Central kinetochore subunit AME1	AME1_YEAST	2	-18.7908	0.812092	40 min	0 min
40 min / 0 min	P38314	P38314	-0.00324866	0.00324866	0.764446	35	0.0513265	0.0513265	P38314	SDS24	Protein SDS24	SDS24_YEAST	6	-0.224926	0.997751	40 min	0 min
40 min / 0 min	P38315	P38315	0.654066	0.654066	0.718266	15	0.263018	0.263018	P38315	YBP1	YAP1-binding protein 1	YBP1_YEAST	3	57.3597	1.5736	40 min	0 min
40 min / 0 min	P38321	P38321	0.224429	0.224429	0.788145	20	0.0298492	0.0298492	P38321	YBR225W	Uncharacterized protein YBR225W	YB75_YEAST	5	16.8315	1.16831	40 min	0 min
40 min / 0 min	P38323	P38323	-0.0522075	0.0522075	0.787257	45	0.0171538	0.0171538	P38323	MCX1	Mitochondrial clpX-like chaperone MCX1	MCX1_YEAST	9	-3.55405	0.964459	40 min	0 min
40 min / 0 min	P38325	P38325	-0.0984466	0.0984466	0.588866	5	-0.104315	0.104315	P38325	OM14	Mitochondrial outer membrane protein OM14	OM14_YEAST	1	-6.59619	0.934038	40 min	0 min
40 min / 0 min	P38326	P38326	-0.108126	0.108126	0.661726	5	-0.102434	0.102434	P38326	SWC5	SWR1-complex protein 5	SWC5_YEAST	1	-7.22074	0.927793	40 min	0 min
40 min / 0 min	P38328	P38328	0.0239882	0.0239882	0.717174	45	-0.0369985	0.0369985	P38328	ARC40	Actin-related protein 2/3 complex subunit 1	ARPC1_YEAST	8	1.67663	1.01677	40 min	0 min
40 min / 0 min	P38329	P38329	-0.0880285	0.0880285	0.499546	10	-0.421227	0.421227	P38329	VHC1	Vacuolar cation-chloride cotransporter 1	VHC1_YEAST	2	-5.91925	0.940807	40 min	0 min
40 min / 0 min	P38330	P38330	0.348272	0.348272	0.799063	10	0.00377431	0.00377431	P38330	YBR238C	Protein RMD9-like, mitochondrial	RMD9L_YEAST	2	27.3035	1.27303	40 min	0 min
40 min / 0 min	P38331	P38331	0.273066	0.273066	0.678452	15	0.225815	0.225815	P38331	YBR242W	HD domain-containing protein YBR242W	YB92_YEAST	3	20.8373	1.20837	40 min	0 min
40 min / 0 min	P38332	P38332	-0.00789586	0.00789586	0.776069	15	-0.0275595	0.0275595	P38332	RRT2	Diphthine methyltransferase	DPH7_YEAST	3	-0.545804	0.994542	40 min	0 min
40 min / 0 min	P38333	P38333	0.000442278	0.000442278	0.775503	100	0.0172904	0.0172904	P38333	ENP1	Essential nuclear protein 1	ENP1_YEAST	19	0.030661	1.00031	40 min	0 min
40 min / 0 min	P38334	P38334	-0.0520395	0.0520395	0.780857	5	-0.0247721	0.0247721	P38334	TRS20	Trafficking protein particle complex subunit 20	TRS20_YEAST	1	-3.54282	0.964572	40 min	0 min
40 min / 0 min	P38337	P38337	0.269545	0.269545	0.598607	15	0.472517	0.472517	P38337	SHG1	COMPASS component SHG1	SHG1_YEAST	2	20.5427	1.20543	40 min	0 min
40 min / 0 min	P38339	P38339	-0.230365	0.230365	0.569247	25	-0.293641	0.293641	P38339	RGD1	RHO GTPase-activating protein RGD1	RGD1_YEAST	5	-14.7581	0.852419	40 min	0 min
40 min / 0 min	P38340	P38340	-0.0669303	0.0669303	0.452039	15	-0.0903664	0.0903664	P38340	TAE1	Alpha N-terminal protein methyltransferase 1	NTM1_YEAST	3	-4.53329	0.954667	40 min	0 min
40 min / 0 min	P38341	P38341	-0.119453	0.119453	0.331942	15	-0.1311	0.1311	P38341	MIC12	MICOS complex subunit MIC12	MIC12_YEAST	3	-7.94631	0.920537	40 min	0 min
40 min / 0 min	P38342	P38342	0.0513077	0.0513077	0.617857	20	0.0997376	0.0997376	P38342	TSC10	3-ketodihydrosphingosine reductase TSC10	TSC10_YEAST	4	3.62038	1.0362	40 min	0 min
40 min / 0 min	P38344	P38344	-0.00142551	0.00142551	0.574183	30	0.204139	0.204139	P38344	REI1	Cytoplasmic 60S subunit biogenesis factor REI1	REI1_YEAST	6	-0.0987597	0.999012	40 min	0 min
40 min / 0 min	P38345	P38345	-0.288741	0.288741	0.0629056	20	-0.326447	0.326447	P38345	SDH8	Succinate dehydrogenase assembly factor 4, mitochondrial	SDHF4_YEAST	4	-18.1384	0.818616	40 min	0 min
40 min / 0 min	P38348	P38348	0.0583813	0.0583813	0.795527	20	-0.00298091	0.00298091	P38348	HSM3	DNA mismatch repair protein HSM3	HSM3_YEAST	4	4.12968	1.0413	40 min	0 min
40 min / 0 min	P38349	P38349	-0.105655	0.105655	0.61376	50	0.206261	0.206261	P38349	UBX7	UBX domain-containing protein 7	UBX7_YEAST	8	-7.06169	0.929383	40 min	0 min
40 min / 0 min	P38351	P38351	-0.0535262	0.0535262	0.531647	50	-0.242059	0.242059	P38351	PAF1	RNA polymerase II-associated protein 1	PAF1_YEAST	9	-3.64217	0.963578	40 min	0 min
40 min / 0 min	P38352	P38352	-0.644204	0.644204	0.669974	10	-0.380095	0.380095	P38352	SAF1	SCF-associated factor 1	SAF1_YEAST	2	-36.0154	0.639846	40 min	0 min
40 min / 0 min	P38353	P38353	0.0660195	0.0660195	0.583352	40	0.0906235	0.0906235	P38353	SSH1	Sec sixty-one protein homolog	SSH1_YEAST	7	4.68244	1.04682	40 min	0 min
40 min / 0 min	P38355	P38355	-0.0760228	0.0760228	0.794411	10	-0.00984178	0.00984178	P38355	YBR287W	Uncharacterized transporter YBR287W	YB8B_YEAST	2	-5.13307	0.948669	40 min	0 min
40 min / 0 min	P38426	P38426	-0.0426279	0.0426279	0.672993	115	0.0359839	0.0359839	P38426	TPS3	Trehalose synthase complex regulatory subunit TPS3	TPS3_YEAST	22	-2.91152	0.970885	40 min	0 min
40 min / 0 min	P38427	P38427	-0.0928669	0.0928669	0.729706	110	0.0423973	0.0423973	P38427	TSL1	Trehalose synthase complex regulatory subunit TSL1	TSL1_YEAST	19	-6.23424	0.937658	40 min	0 min
40 min / 0 min	P38428	P38428	-0.0991972	0.0991972	0.688622	25	0.0849055	0.0849055	P38428	CUE1	Coupling of ubiquitin conjugation to ER degradation protein 1	CUE1_YEAST	5	-6.64477	0.933552	40 min	0 min
40 min / 0 min	P38430	P38430	-0.705516	0.705516	0.507128	15	-1.05879	1.05879	P38430	YMR262W	Uncharacterized deoxyribonuclease YMR262W	YM8C_YEAST	2	-38.6777	0.613223	40 min	0 min
40 min / 0 min	P38431	P38431	0.0809541	0.0809541	0.555399	95	0.0829504	0.0829504	P38431	TIF5	Eukaryotic translation initiation factor 5	IF5_YEAST	15	5.77173	1.05772	40 min	0 min
40 min / 0 min	P38439	P38439	-0.0986233	0.0986233	0.792783	25	0.00802295	0.00802295	P38439	LEO1	RNA polymerase-associated protein LEO1	LEO1_YEAST	4	-6.60762	0.933924	40 min	0 min
40 min / 0 min	P38523	P38523	-0.076773	0.076773	0.725394	65	0.0358622	0.0358622	P38523	MGE1	GrpE protein homolog, mitochondrial	GRPE_YEAST	11	-5.18238	0.948176	40 min	0 min
40 min / 0 min	P38555	P38555	-0.0355404	0.0355404	0.771868	65	-0.0115244	0.0115244	P38555	YPT31	GTP-binding protein YPT31/YPT8	YPT31_YEAST	12	-2.43338	0.975666	40 min	0 min
40 min / 0 min	P38604	P38604	0.13223	0.13223	0.500631	15	0.205399	0.205399	P38604	ERG7	Lanosterol synthase	ERG7_YEAST	3	9.59862	1.09599	40 min	0 min
40 min / 0 min	P38615	P38615	0.131181	0.131181	0.787466	15	0.0266664	0.0266664	P38615	RIM11	Serine/threonine-protein kinase RIM11/MSD1	RIM11_YEAST	3	9.519	1.09519	40 min	0 min
40 min / 0 min	P38616	P38616	-0.0175545	0.0175545	0.750764	15	-0.0339278	0.0339278	P38616	YGP1	Protein YGP1	YGP1_YEAST	3	-1.20941	0.987906	40 min	0 min
40 min / 0 min	P38620	P38620	-0.0773826	0.0773826	0.785409	20	-0.0206324	0.0206324	P38620	PRS2	Ribose-phosphate pyrophosphokinase 2	KPR2_YEAST	3	-5.22244	0.947776	40 min	0 min
40 min / 0 min	P38623	P38623	0.183153	0.183153	0.563998	60	0.0688072	0.0688072	P38623	RCK2	Serine/threonine-protein kinase RCK2	RCK2_YEAST	11	13.5362	1.13536	40 min	0 min
40 min / 0 min	P38624	P38624	-0.170756	0.170756	0.331942	65	-0.191631	0.191631	P38624	PRE3	Proteasome subunit beta type-1	PSB1_YEAST	11	-11.1623	0.888377	40 min	0 min
40 min / 0 min	P38625	P38625	0.146538	0.146538	0.00317051	230	0.23396	0.23396	P38625	GUA1	GMP synthase [glutamine-hydrolyzing]	GUAA_YEAST	32	10.691	1.10691	40 min	0 min
40 min / 0 min	P38626	P38626	0.124683	0.124683	0.724962	125	0.0357907	0.0357907	P38626	CBR1	NADH-cytochrome b5 reductase 1	NCB5R_YEAST	17	9.02682	1.09027	40 min	0 min
40 min / 0 min	P38627	P38627	-0.0648675	0.0648675	0.743096	60	0.0249115	0.0249115	P38627	URA8	CTP synthase 2	URA8_YEAST	10	-4.39669	0.956033	40 min	0 min
40 min / 0 min	P38628	P38628	-0.0806655	0.0806655	0.648838	80	-0.0870689	0.0870689	P38628	PCM1	Phosphoacetylglucosamine mutase	AGM1_YEAST	14	-5.43787	0.945621	40 min	0 min
40 min / 0 min	P38629	P38629	-0.089645	0.089645	0.562417	70	-0.0801689	0.0801689	P38629	RFC3	Replication factor C subunit 3	RFC3_YEAST	14	-6.0246	0.939754	40 min	0 min
40 min / 0 min	P38630	P38630	-0.0293716	0.0293716	0.766211	85	-0.0143457	0.0143457	P38630	RFC1	Replication factor C subunit 1	RFC1_YEAST	16	-2.0153	0.979847	40 min	0 min
40 min / 0 min	P38631	P38631	0.096382	0.096382	0.713807	285	-0.0214452	0.0214452	P38631	FKS1	1,3-beta-glucan synthase component FKS1	FKS1_YEAST	43	6.9089	1.06909	40 min	0 min
40 min / 0 min	P38632	P38632	0.291738	0.291738	0.684948	10	0.246288	0.246288	P38632	MMS21	E3 SUMO-protein ligase MMS21	NSE2_YEAST	2	22.4114	1.22411	40 min	0 min
40 min / 0 min	P38635	P38635	-0.169062	0.169062	0.431813	20	-0.133585	0.133585	P38635	HIS2	Histidinol-phosphatase	HIS9_YEAST	4	-11.0579	0.889421	40 min	0 min
40 min / 0 min	P38682	P38682	0.0514093	0.0514093	0.728844	70	-0.0502456	0.0502456	P38682	GLO3	ADP-ribosylation factor GTPase-activating protein GLO3	GLO3_YEAST	11	3.62768	1.03628	40 min	0 min
40 min / 0 min	P38687	P38687	-0.0685504	0.0685504	0.768902	75	0.0333561	0.0333561	P38687	SRP68	Signal recognition particle subunit SRP68	SRP68_YEAST	14	-4.64043	0.953596	40 min	0 min
40 min / 0 min	P38688	P38688	0.0153285	0.0153285	0.610462	90	0.101579	0.101579	P38688	SRP72	Signal recognition particle subunit SRP72	SRP72_YEAST	16	1.06816	1.01068	40 min	0 min
40 min / 0 min	P38689	P38689	-0.0844422	0.0844422	0.676363	55	-0.0557392	0.0557392	P38689	PRS3	Ribose-phosphate pyrophosphokinase 3	KPR3_YEAST	10	-5.68509	0.943149	40 min	0 min
40 min / 0 min	P38691	P38691	0.420206	0.420206	0.508935	20	0.401645	0.401645	P38691	KSP1	Serine/threonine-protein kinase KSP1	KSP1_YEAST	4	33.8119	1.33812	40 min	0 min
40 min / 0 min	P38694	P38694	-0.0297081	0.0297081	0.760143	85	-0.0276997	0.0276997	P38694	MSC7	Putative aldehyde dehydrogenase-like protein YHR039C	MSC7_YEAST	16	-2.03815	0.979619	40 min	0 min
40 min / 0 min	P38697	P38697	0.032446	0.032446	0.587813	180	0.0887436	0.0887436	P38697	IMD2	Inosine-5'-monophosphate dehydrogenase 2	IMDH2_YEAST	22	2.27447	1.02274	40 min	0 min
40 min / 0 min	P38698	P38698	-0.113518	0.113518	0.799387	55	-0.00219009	0.00219009	P38698	PPX1	Exopolyphosphatase	PPX1_YEAST	10	-7.56684	0.924332	40 min	0 min
40 min / 0 min	P38699	P38699	-0.0173979	0.0173979	0.775253	5	-0.01427	0.01427	P38699	STB5	Protein STB5	STB5_YEAST	1	-1.19869	0.988013	40 min	0 min
40 min / 0 min	P38701	P38701	-0.0525456	0.0525456	0.644608	75	0.17629	0.17629	P38701	RPS20	40S ribosomal protein S20	RS20_YEAST	11	-3.57666	0.964233	40 min	0 min
40 min / 0 min	P38703	P38703	1.02431	1.02431	0.55047	10	0.734907	0.734907	P38703	LAG1	Sphingosine N-acyltransferase LAG1	LAG1_YEAST	2	103.399	2.03399	40 min	0 min
40 min / 0 min	P38707	P38707	0.00553211	0.00553211	0.665031	210	-0.0426458	0.0426458	P38707	DED81	Asparagine--tRNA ligase, cytoplasmic	SYNC_YEAST	28	0.384193	1.00384	40 min	0 min
40 min / 0 min	P38708	P38708	-0.0107027	0.0107027	0.771508	280	-0.00895297	0.00895297	P38708	YHR020W	Putative proline--tRNA ligase YHR020W	YHI0_YEAST	37	-0.73911	0.992609	40 min	0 min
40 min / 0 min	P38710	P38710	-0.139219	0.139219	0.664609	50	-0.0479465	0.0479465	P38710	INM1	Inositol monophosphatase 1	INM1_YEAST	9	-9.19896	0.90801	40 min	0 min
40 min / 0 min	P38712	P38712	0.13943	0.13943	0.486863	95	0.151571	0.151571	P38712	RRP3	ATP-dependent rRNA helicase RRP3	RRP3_YEAST	14	10.147	1.10147	40 min	0 min
40 min / 0 min	P38713	P38713	-0.0688111	0.0688111	0.552393	30	-0.341864	0.341864	P38713	OSH3	Oxysterol-binding protein homolog 3	OSH3_YEAST	6	-4.65766	0.953423	40 min	0 min
40 min / 0 min	P38715	P38715	-0.02008	0.02008	0.600528	130	0.0647463	0.0647463	P38715	GRE3	NADPH-dependent aldose reductase GRE3	GRE3_YEAST	21	-1.3822	0.986178	40 min	0 min
40 min / 0 min	P38716	P38716	-0.164595	0.164595	0.56448	15	-0.127348	0.127348	P38716	YHR112C	Uncharacterized trans-sulfuration enzyme YHR112C	YHR2_YEAST	3	-10.7821	0.892179	40 min	0 min
40 min / 0 min	P38719	P38719	-0.0669511	0.0669511	0.603933	15	-0.0905262	0.0905262	P38719	DBP8	ATP-dependent RNA helicase DBP8	DBP8_YEAST	4	-4.53467	0.954653	40 min	0 min
40 min / 0 min	P38720	P38720	0.109871	0.109871	0.591238	265	0.0768325	0.0768325	P38720	GND1	6-phosphogluconate dehydrogenase, decarboxylating 1	6PGD1_YEAST	37	7.91318	1.07913	40 min	0 min
40 min / 0 min	P38732	P38732	-0.0404931	0.0404931	0.620652	55	-0.137974	0.137974	P38732	EFM1	Protein-lysine N-methyltransferase EFM1	EFM1_YEAST	9	-2.76775	0.972323	40 min	0 min
40 min / 0 min	P38736	P38736	0.0447476	0.0447476	0.679327	35	-0.0478143	0.0478143	P38736	GOS1	Golgi SNAP receptor complex member 1	GOSR1_YEAST	7	3.15027	1.0315	40 min	0 min
40 min / 0 min	P38737	P38737	0.157819	0.157819	0.688622	155	-0.0374547	0.0374547	P38737	ECM29	Proteasome component ECM29	ECM29_YEAST	30	11.5599	1.1156	40 min	0 min
40 min / 0 min	P38738	P38738	-0.372176	0.372176	0.630969	10	-0.209777	0.209777	P38738	OCA5	Oxidant-induced cell-cycle arrest protein 5	OCA5_YEAST	2	-22.7384	0.772616	40 min	0 min
40 min / 0 min	P38746	P38746	-0.0483111	0.0483111	0.74377	5	-0.0481882	0.0481882	P38746	YLF2	Obg-like ATPase homolog	YLF2_YEAST	1	-3.29322	0.967068	40 min	0 min
40 min / 0 min	P38747	P38747	-0.212696	0.212696	0.676426	25	-0.148559	0.148559	P38747	OTU2	OTU domain-containing protein 2	OTU2_YEAST	5	-13.7077	0.862923	40 min	0 min
40 min / 0 min	P38749	P38749	-0.366872	0.366872	0.742568	15	-0.293295	0.293295	P38749	YAP3	AP-1-like transcription factor YAP3	YAP3_YEAST	2	-22.4538	0.775462	40 min	0 min
40 min / 0 min	P38753	P38753	-0.0375891	0.0375891	0.721156	30	-0.0252956	0.0252956	P38753	HSE1	Class E vacuolar protein-sorting machinery protein HSE1	HSE1_YEAST	6	-2.57183	0.974282	40 min	0 min
40 min / 0 min	P38754	P38754	-0.144023	0.144023	0.73027	10	-0.0377257	0.0377257	P38754	RPL14B	60S ribosomal protein L14-B	RL14B_YEAST	2	-9.50082	0.904992	40 min	0 min
40 min / 0 min	P38755	P38755	-0.0112463	0.0112463	0.793158	45	0.00401968	0.00401968	P38755	OSH7	Oxysterol-binding protein homolog 7	OSH7_YEAST	9	-0.776505	0.992235	40 min	0 min
40 min / 0 min	P38756	P38756	-0.000133208	0.000133208	0.726794	25	-0.0720918	0.0720918	P38756	TCD1	tRNA threonylcarbamoyladenosine dehydratase 1	TCD1_YEAST	5	-0.00923287	0.999908	40 min	0 min
40 min / 0 min	P38758	P38758	-0.0186275	0.0186275	0.656758	50	-0.0501523	0.0501523	P38758	TDA3	Putative oxidoreductase TDA3	TDA3_YEAST	10	-1.28286	0.987171	40 min	0 min
40 min / 0 min	P38759	P38759	-0.0305176	0.0305176	0.637521	35	0.227526	0.227526	P38759	VPS29	Vacuolar protein sorting-associated protein 29	VPS29_YEAST	6	-2.09311	0.979069	40 min	0 min
40 min / 0 min	P38764	P38764	0.0566572	0.0566572	0.500897	210	0.0833498	0.0833498	P38764	RPN1	26S proteasome regulatory subunit RPN1	RPN1_YEAST	35	4.00531	1.04005	40 min	0 min
40 min / 0 min	P38765	P38765	-0.0383162	0.0383162	0.696361	65	-0.0404161	0.0404161	P38765	YHI9	Uncharacterized isomerase YHI9	YHI9_YEAST	11	-2.62092	0.973791	40 min	0 min
40 min / 0 min	P38766	P38766	0.274998	0.274998	0.649768	5	0.269031	0.269031	P38766	RRM3	ATP-dependent DNA helicase RRM3	RRM3_YEAST	1	20.9993	1.20999	40 min	0 min
40 min / 0 min	P38768	P38768	0.348383	0.348383	0.797393	15	-0.00697535	0.00697535	P38768	PIH1	Protein interacting with Hsp90 1	PIH1_YEAST	3	27.3133	1.27313	40 min	0 min
40 min / 0 min	P38770	P38770	0.0860589	0.0860589	0.733384	10	0.0598232	0.0598232	P38770	BRL1	Nucleus export protein BRL1	BRL1_YEAST	2	6.14665	1.06147	40 min	0 min
40 min / 0 min	P38771	P38771	-0.0369882	0.0369882	0.771551	5	-0.0386088	0.0386088	P38771	RRF1	Ribosome-recycling factor, mitochondrial	RRF1_YEAST	1	-2.53124	0.974688	40 min	0 min
40 min / 0 min	P38773	P38773	-0.0528559	0.0528559	0.745908	30	-0.025198	0.025198	P38773	DOG2	2-deoxyglucose-6-phosphate phosphatase 2	DOG2_YEAST	5	-3.59739	0.964026	40 min	0 min
40 min / 0 min	P38775	P38775	-0.302633	0.302633	0.608368	5	-0.275032	0.275032	P38775	YHR045W	Putative uncharacterized protein YHR045W	YHK5_YEAST	1	-18.9229	0.810771	40 min	0 min
40 min / 0 min	P38777	P38777	0.00694715	0.00694715	0.786802	85	0.00724724	0.00724724	P38777	FSH1	Family of serine hydrolases 1	FSH1_YEAST	10	0.482701	1.00483	40 min	0 min
40 min / 0 min	P38779	P38779	-0.0382545	0.0382545	0.797612	50	-0.00228112	0.00228112	P38779	CIC1	Proteasome-interacting protein CIC1	CIC1_YEAST	8	-2.61676	0.973832	40 min	0 min
40 min / 0 min	P38781	P38781	0.260538	0.260538	0.721973	10	0.249059	0.249059	P38781	RSC30	Chromatin structure-remodeling complex protein RSC30	RSC30_YEAST	2	19.7925	1.19793	40 min	0 min
40 min / 0 min	P38782	P38782	0.120357	0.120357	0.672993	20	0.149348	0.149348	P38782	MED6	Mediator of RNA polymerase II transcription subunit 6	MED6_YEAST	4	8.70039	1.087	40 min	0 min
40 min / 0 min	P38784	P38784	-0.093195	0.093195	0.653278	5	-0.0928333	0.0928333	P38784	VMA22	Vacuolar ATPase assembly protein VMA22	VMA22_YEAST	1	-6.25556	0.937444	40 min	0 min
40 min / 0 min	P38786	P38786	-0.0208307	0.0208307	0.677033	30	-0.107417	0.107417	P38786	RPP1	Ribonuclease P/MRP protein subunit RPP1	RPP1_YEAST	5	-1.4335	0.985665	40 min	0 min
40 min / 0 min	P38787	P38787	-0.117938	0.117938	0.771207	100	0.0228957	0.0228957	P38787	PAN5	2-dehydropantoate 2-reductase	PANE_YEAST	16	-7.84964	0.921504	40 min	0 min
40 min / 0 min	P38788	P38788	0.188323	0.188323	0.138779	170	0.138553	0.138553	P38788	SSZ1	Ribosome-associated complex subunit SSZ1	SSZ1_YEAST	28	13.9438	1.13944	40 min	0 min
40 min / 0 min	P38789	P38789	-0.0369275	0.0369275	0.641879	40	0.276063	0.276063	P38789	SSF1	Ribosome biogenesis protein SSF1	SSF1_YEAST	6	-2.52714	0.974729	40 min	0 min
40 min / 0 min	P38790	P38790	0.566402	0.566402	0.747522	5	0.483457	0.483457	P38790	HTD2	Hydroxyacyl-thioester dehydratase type 2, mitochondrial	HTD2_YEAST	1	48.0826	1.48083	40 min	0 min
40 min / 0 min	P38791	P38791	0.0382861	0.0382861	0.572014	165	-0.140213	0.140213	P38791	DYS1	Deoxyhypusine synthase	DHYS_YEAST	21	2.68932	1.02689	40 min	0 min
40 min / 0 min	P38792	P38792	-0.128196	0.128196	0.742096	35	-0.040742	0.040742	P38792	RRP4	Exosome complex component RRP4	RRP4_YEAST	6	-8.50252	0.914975	40 min	0 min
40 min / 0 min	P38793	P38793	-0.0878678	0.0878678	0.699018	40	-0.0985474	0.0985474	P38793	TRM5	tRNA (guanine(37)-N1)-methyltransferase	TRM5_YEAST	7	-5.90877	0.940912	40 min	0 min
40 min / 0 min	P38795	P38795	-0.0193363	0.0193363	0.736389	95	-0.0480215	0.0480215	P38795	QNS1	Glutamine-dependent NAD(+) synthetase	NADE_YEAST	16	-1.33135	0.986687	40 min	0 min
40 min / 0 min	P38797	P38797	-0.369781	0.369781	0.203899	35	-0.63841	0.63841	P38797	PTC7	Protein phosphatase 2C homolog 7, mitochondrial	PP2C7_YEAST	7	-22.61	0.7739	40 min	0 min
40 min / 0 min	P38798	P38798	-0.250119	0.250119	0.799633	20	0.00323762	0.00323762	P38798	NMD2	Nonsense-mediated mRNA decay protein 2	NMD2_YEAST	4	-15.9173	0.840827	40 min	0 min
40 min / 0 min	P38801	P38801	0.0182648	0.0182648	0.676363	30	0.051949	0.051949	P38801	LRP1	Exosome complex protein LRP1	LRP1_YEAST	5	1.27407	1.01274	40 min	0 min
40 min / 0 min	P38803	P38803	-0.203367	0.203367	0.489364	5	-0.204571	0.204571	P38803	IPI1	Pre-rRNA-processing protein IPI1	IPI1_YEAST	1	-13.1479	0.868521	40 min	0 min
40 min / 0 min	P38804	P38804	-0.0547638	0.0547638	0.60651	10	-0.104886	0.104886	P38804	RTC3	Restriction of telomere capping protein 3	SDO1L_YEAST	2	-3.72479	0.962752	40 min	0 min
40 min / 0 min	P38805	P38805	-0.000161197	0.000161197	0.627094	35	0.0701859	0.0701859	P38805	RPF1	Ribosome production factor 1	RPF1_YEAST	7	-0.0111727	0.999888	40 min	0 min
40 min / 0 min	P38806	P38806	0.158548	0.158548	0.628142	5	0.172648	0.172648	P38806	YNG2	Chromatin modification-related protein YNG2	YNG2_YEAST	1	11.6163	1.11616	40 min	0 min
40 min / 0 min	P38809	P38809	0.0806584	0.0806584	0.671678	35	-0.0785657	0.0785657	P38809	YHR097C	Uncharacterized protein YHR097C	YHP7_YEAST	7	5.75005	1.0575	40 min	0 min
40 min / 0 min	P38810	P38810	0.0460051	0.0460051	0.616895	80	-0.116113	0.116113	P38810	SFB3	SED5-binding protein 3	SFB3_YEAST	16	3.24022	1.0324	40 min	0 min
40 min / 0 min	P38811	P38811	0.0583483	0.0583483	0.728335	105	-0.0633634	0.0633634	P38811	TRA1	Transcription-associated protein 1	TRA1_YEAST	21	4.1273	1.04127	40 min	0 min
40 min / 0 min	P38814	P38814	-0.0266997	0.0266997	0.784667	15	-0.0214518	0.0214518	P38814	SBE22	Protein SBE22	SBE22_YEAST	3	-1.83366	0.981663	40 min	0 min
40 min / 0 min	P38816	P38816	0.0640962	0.0640962	0.710157	5	0.0658308	0.0658308	P38816	TRR2	Thioredoxin reductase 2, mitochondrial	TRXB2_YEAST	1	4.54298	1.04543	40 min	0 min
40 min / 0 min	P38817	P38817	-0.0349218	0.0349218	0.599576	70	-0.100567	0.100567	P38817	GGA2	ADP-ribosylation factor-binding protein GGA2	GGA2_YEAST	11	-2.39153	0.976085	40 min	0 min
40 min / 0 min	P38819	P38819	0.710187	0.710187	0.631449	5	0.632078	0.632078	P38819	ERP5	Protein ERP5	ERP5_YEAST	1	63.6017	1.63602	40 min	0 min
40 min / 0 min	P38820	P38820	-0.174181	0.174181	0.648367	40	0.252256	0.252256	P38820	UBA4	Adenylyltransferase and sulfurtransferase UBA4	UBA4_YEAST	9	-11.3729	0.886271	40 min	0 min
40 min / 0 min	P38821	P38821	-0.00190638	0.00190638	0.792222	55	0.00720432	0.00720432	P38821	APE4	Aspartyl aminopeptidase 4	DNPEP_YEAST	8	-0.132053	0.998679	40 min	0 min
40 min / 0 min	P38822	P38822	-0.0510852	0.0510852	0.589608	45	-0.0785767	0.0785767	P38822	BZZ1	Protein BZZ1	BZZ1_YEAST	9	-3.479	0.96521	40 min	0 min
40 min / 0 min	P38823	P38823	1.22522	1.22522	0.763045	10	-0.162726	0.162726	P38823	DMA1	E3 ubiquitin-protein ligase DMA1	DMA1_YEAST	2	133.791	2.33791	40 min	0 min
40 min / 0 min	P38825	P38825	-0.152086	0.152086	0.55047	40	-0.131516	0.131516	P38825	TOM71	Protein TOM71	TOM71_YEAST	8	-10.0052	0.899948	40 min	0 min
40 min / 0 min	P38828	P38828	-0.0755697	0.0755697	0.649738	45	0.148937	0.148937	P38828	LSM12	Protein LSM12	LSM12_YEAST	8	-5.10327	0.948967	40 min	0 min
40 min / 0 min	P38829	P38829	-0.212636	0.212636	0.278607	20	-0.221887	0.221887	P38829	YHR122W	MIP18 family protein YHR122W	YHS2_YEAST	4	-13.7041	0.862959	40 min	0 min
40 min / 0 min	P38833	P38833	-0.00497232	0.00497232	0.759616	20	-0.0314393	0.0314393	P38833	YHR127W	Uncharacterized protein YHR127W	YHS7_YEAST	4	-0.344062	0.996559	40 min	0 min
40 min / 0 min	P38836	P38836	0.0140924	0.0140924	0.717174	45	0.0418174	0.0418174	P38836	ECM14	Putative metallocarboxypeptidase ECM14	ECM14_YEAST	7	0.981598	1.00982	40 min	0 min
40 min / 0 min	P38837	P38837	0.0999881	0.0999881	0.596315	25	-0.101525	0.101525	P38837	NSG1	Protein NSG1	NSG1_YEAST	5	7.17646	1.07176	40 min	0 min
40 min / 0 min	P38840	P38840	-0.154809	0.154809	0.545623	90	-0.119159	0.119159	P38840	ARO9	Aromatic amino acid aminotransferase 2	ARO9_YEAST	18	-10.1749	0.898251	40 min	0 min
40 min / 0 min	P38841	P38841	-0.0585787	0.0585787	0.687522	5	-0.064501	0.064501	P38841	YHR138C	Uncharacterized protein YHR138C	YHT8_YEAST	1	-3.97904	0.96021	40 min	0 min
40 min / 0 min	P38845	P38845	0.0289033	0.0289033	0.455111	95	0.17254	0.17254	P38845	CRP1	Cruciform DNA-recognizing protein 1	CRP1_YEAST	15	2.02363	1.02024	40 min	0 min
40 min / 0 min	P38850	P38850	0.0283838	0.0283838	0.518243	25	0.420554	0.420554	P38850	RTT107	Regulator of Ty1 transposition protein 107	RT107_YEAST	5	1.98689	1.01987	40 min	0 min
40 min / 0 min	P38853	P38853	-0.0425331	0.0425331	0.565646	95	0.14474	0.14474	P38853	KEL1	Kelch repeat-containing protein 1	KEL1_YEAST	18	-2.90514	0.970949	40 min	0 min
40 min / 0 min	P38854	P38854	-0.0639871	0.0639871	0.666459	10	-0.187009	0.187009	P38854	TDA11	Topoisomerase I damage affected protein 11	TDA11_YEAST	2	-4.33833	0.956617	40 min	0 min
40 min / 0 min	P38856	P38856	-0.0484814	0.0484814	0.718608	15	-0.0303869	0.0303869	P38856	YAP1801	Clathrin coat assembly protein AP180A	AP18A_YEAST	3	-3.30464	0.966954	40 min	0 min
40 min / 0 min	P38858	P38858	-0.0981679	0.0981679	0.78998	95	-0.00822469	0.00822469	P38858	SOL3	6-phosphogluconolactonase 3	SOL3_YEAST	16	-6.57814	0.934219	40 min	0 min
40 min / 0 min	P38859	P38859	0.413006	0.413006	0.554298	10	0.62785	0.62785	P38859	DNA2	DNA replication ATP-dependent helicase/nuclease DNA2	DNA2_YEAST	2	33.1457	1.33146	40 min	0 min
40 min / 0 min	P38861	P38861	0.178487	0.178487	0.607992	90	0.0732588	0.0732588	P38861	NMD3	60S ribosomal export protein NMD3	NMD3_YEAST	15	13.1697	1.1317	40 min	0 min
40 min / 0 min	P38862	P38862	-0.10552	0.10552	0.723869	15	-0.0971528	0.0971528	P38862	ATG7	Ubiquitin-like modifier-activating enzyme ATG7	ATG7_YEAST	3	-7.05303	0.92947	40 min	0 min
40 min / 0 min	P38863	P38863	-0.0808506	0.0808506	0.703777	20	-0.243494	0.243494	P38863	SPC97	Spindle pole body component SPC97	SPC97_YEAST	4	-5.45	0.9455	40 min	0 min
40 min / 0 min	P38869	P38869	-0.00593692	0.00593692	0.787257	15	-0.00865814	0.00865814	P38869	SVP26	Protein SVP26	SVP26_YEAST	3	-0.41067	0.995893	40 min	0 min
40 min / 0 min	P38873	P38873	-0.0216336	0.0216336	0.579099	35	0.103113	0.103113	P38873	KOG1	Target of rapamycin complex 1 subunit KOG1	KOG1_YEAST	7	-1.48834	0.985117	40 min	0 min
40 min / 0 min	P38874	P38874	0.182227	0.182227	0.681134	15	0.135503	0.135503	P38874	IKI1	Elongator complex protein 5	ELP5_YEAST	3	13.4634	1.13463	40 min	0 min
40 min / 0 min	P38875	P38875	0.238769	0.238769	0.475345	50	0.305496	0.305496	P38875	GPI16	GPI transamidase component GPI16	GPI16_YEAST	7	17.9985	1.17999	40 min	0 min
40 min / 0 min	P38877	P38877	-0.319341	0.319341	0.562417	5	-0.321247	0.321247	P38877	CTF8	Chromosome transmission fidelity protein 8	CTF8_YEAST	1	-19.8564	0.801436	40 min	0 min
40 min / 0 min	P38878	P38878	-0.109456	0.109456	0.757722	10	0.11161	0.11161	P38878	LNP1	Protein lunapark	LNP_YEAST	2	-7.30622	0.926938	40 min	0 min
40 min / 0 min	P38879	P38879	0.0233532	0.0233532	0.647806	75	0.078948	0.078948	P38879	EGD2	Nascent polypeptide-associated complex subunit alpha	NACA_YEAST	8	1.63189	1.01632	40 min	0 min
40 min / 0 min	P38881	P38881	-0.209354	0.209354	0.627892	15	0.595545	0.595545	P38881	NVJ1	Nucleus-vacuole junction protein 1	NVJ1_YEAST	3	-13.5076	0.864924	40 min	0 min
40 min / 0 min	P38882	P38882	0.0267268	0.0267268	0.448551	45	0.327167	0.327167	P38882	UTP9	U3 small nucleolar RNA-associated protein 9	UTP9_YEAST	8	1.86983	1.0187	40 min	0 min
40 min / 0 min	P38883	P38883	-0.142686	0.142686	0.448551	70	-0.127247	0.127247	P38883	RIX1	Pre-rRNA-processing protein RIX1	RIX1_YEAST	13	-9.41686	0.905831	40 min	0 min
40 min / 0 min	P38884	P38884	-0.204023	0.204023	0.138202	10	-0.20778	0.20778	P38884	AIM18	Altered inheritance of mitochondria protein 18, mitochondrial	AIM18_YEAST	2	-13.1873	0.868127	40 min	0 min
40 min / 0 min	P38885	P38885	-0.136911	0.136911	0.61975	10	-0.162995	0.162995	P38885	AIM46	Altered inheritance of mitochondria protein 46, mitochondrial	AIM46_YEAST	2	-9.05359	0.909464	40 min	0 min
40 min / 0 min	P38886	P38886	-0.113458	0.113458	0.562417	60	-0.0713325	0.0713325	P38886	RPN10	26S proteasome regulatory subunit RPN10	RPN10_YEAST	9	-7.56299	0.92437	40 min	0 min
40 min / 0 min	P38889	P38889	0.211232	0.211232	0.55775	25	0.257578	0.257578	P38889	SKN7	Transcription factor SKN7	SKN7_YEAST	4	15.7676	1.15768	40 min	0 min
40 min / 0 min	P38890	P38890	-0.0689351	0.0689351	0.55047	35	-0.506629	0.506629	P38890	SET5	Putative protein lysine methyltransferase SET5	SET5_YEAST	7	-4.66586	0.953341	40 min	0 min
40 min / 0 min	P38891	P38891	-0.0292708	0.0292708	0.777618	165	0.018625	0.018625	P38891	BAT1	Branched-chain-amino-acid aminotransferase, mitochondrial	BCA1_YEAST	21	-2.00845	0.979915	40 min	0 min
40 min / 0 min	P38902	P38902	0.0372228	0.0372228	0.760921	35	-0.0184955	0.0184955	P38902	RPB11	DNA-directed RNA polymerase II subunit RPB11	RPB11_YEAST	7	2.61366	1.02614	40 min	0 min
40 min / 0 min	P38903	P38903	0.048496	0.048496	0.698503	35	-0.0491999	0.0491999	P38903	RTS1	Serine/threonine-protein phosphatase 2A 56 kDa regulatory subunit delta isoform	2A5D_YEAST	7	3.41862	1.03419	40 min	0 min
40 min / 0 min	P38910	P38910	-0.0821598	0.0821598	0.702524	40	-0.04011	0.04011	P38910	HSP10	10 kDa heat shock protein, mitochondrial	CH10_YEAST	6	-5.53576	0.944642	40 min	0 min
40 min / 0 min	P38911	P38911	0.00573541	0.00573541	0.798876	50	-0.00104006	0.00104006	P38911	FPR3	FK506-binding nuclear protein	FKBP3_YEAST	8	0.39834	1.00398	40 min	0 min
40 min / 0 min	P38912	P38912	-0.00102103	0.00102103	0.595069	55	-0.0847784	0.0847784	P38912	TIF11	Eukaryotic translation initiation factor 1A	IF1A_YEAST	8	-0.0707477	0.999293	40 min	0 min
40 min / 0 min	P38913	P38913	-0.0572764	0.0572764	0.751311	10	-0.0466176	0.0466176	P38913	FAD1	FAD synthase	FAD1_YEAST	2	-3.89232	0.961077	40 min	0 min
40 min / 0 min	P38915	P38915	0.0391194	0.0391194	0.775631	20	0.0414459	0.0414459	P38915	SPT8	Transcription factor SPT8	SPT8_YEAST	4	2.74865	1.02749	40 min	0 min
40 min / 0 min	P38922	P38922	-0.0441521	0.0441521	0.753482	50	-0.0422485	0.0422485	P38922	HRB1	Protein HRB1	HRB1_YEAST	8	-3.01403	0.96986	40 min	0 min
40 min / 0 min	P38925	P38925	-0.101756	0.101756	0.793439	10	0.0294974	0.0294974	P38925	SMF1	Manganese transporter SMF1	SMF1_YEAST	2	-6.81018	0.931898	40 min	0 min
40 min / 0 min	P38928	P38928	-0.0649501	0.0649501	0.620652	15	-0.0846336	0.0846336	P38928	AXL2	Axial budding pattern protein 2	AXL2_YEAST	3	-4.40216	0.955978	40 min	0 min
40 min / 0 min	P38929	P38929	0.0818431	0.0818431	0.77818	25	0.053988	0.053988	P38929	PMC1	Calcium-transporting ATPase 2	ATC2_YEAST	5	5.83693	1.05837	40 min	0 min
40 min / 0 min	P38930	P38930	-0.0877305	0.0877305	0.769346	25	0.0172581	0.0172581	P38930	CKB2	Casein kinase II subunit beta'	CSK2C_YEAST	5	-5.89982	0.941002	40 min	0 min
40 min / 0 min	P38931	P38931	0.187524	0.187524	0.635073	5	0.179923	0.179923	P38931	SSN2	Mediator of RNA polymerase II transcription subunit 13	SSN2_YEAST	1	13.8808	1.13881	40 min	0 min
40 min / 0 min	P38932	P38932	0.00440416	0.00440416	0.651139	30	0.193041	0.193041	P38932	VPS45	Vacuolar protein sorting-associated protein 45	VPS45_YEAST	5	0.30574	1.00306	40 min	0 min
40 min / 0 min	P38934	P38934	0.124185	0.124185	0.384811	260	0.141273	0.141273	P38934	BFR1	Nuclear segregation protein BFR1	BFR1_YEAST	41	8.98916	1.08989	40 min	0 min
40 min / 0 min	P38958	P38958	-0.0713034	0.0713034	0.729992	5	-0.0638171	0.0638171	P38958	PET100	Protein PET100, mitochondrial	PT100_YEAST	1	-4.82222	0.951778	40 min	0 min
40 min / 0 min	P38959	P38959	-0.0954523	0.0954523	0.742464	15	-0.0948607	0.0948607	P38959	VPS41	Vacuolar protein sorting-associated protein 41	VPS41_YEAST	3	-6.40212	0.935979	40 min	0 min
40 min / 0 min	P38961	P38961	0.033224	0.033224	0.715789	50	0.185596	0.185596	P38961	RRP8	25S rRNA (adenine(645)-N(1))-methyltransferase	RRP8_YEAST	8	2.32964	1.0233	40 min	0 min
40 min / 0 min	P38962	P38962	-0.0300326	0.0300326	0.599324	20	-0.690556	0.690556	P38962	TVP23	Golgi apparatus membrane protein TVP23	TVP23_YEAST	4	-2.06018	0.979398	40 min	0 min
40 min / 0 min	P38966	P38966	-0.0848306	0.0848306	0.779036	25	-0.0315276	0.0315276	P38966	YDR089W	Uncharacterized protein YDR089W	YD089_YEAST	5	-5.71047	0.942895	40 min	0 min
40 min / 0 min	P38968	P38968	0.274085	0.274085	0.507128	200	0.131096	0.131096	P38968	SEC31	Protein transport protein SEC31	SEC31_YEAST	32	20.9227	1.20923	40 min	0 min
40 min / 0 min	P38970	P38970	0.421269	0.421269	0.519654	30	0.248758	0.248758	P38970	HAL5	Serine/threonine-protein kinase HAL5	HAL5_YEAST	6	33.9105	1.3391	40 min	0 min
40 min / 0 min	P38972	P38972	0.120445	0.120445	0.331942	430	0.162679	0.162679	P38972	ADE6	Phosphoribosylformylglycinamidine synthase	PUR4_YEAST	63	8.70703	1.08707	40 min	0 min
40 min / 0 min	P38985	P38985	-0.0834623	0.0834623	0.78529	35	-0.0163439	0.0163439	P38985	SRP14	Signal recognition particle subunit SRP14	SRP14_YEAST	6	-5.62101	0.94379	40 min	0 min
40 min / 0 min	P38986	P38986	-0.0149737	0.0149737	0.790521	60	-0.00926054	0.00926054	P38986	ASP1	L-asparaginase 1	ASPG1_YEAST	9	-1.03253	0.989675	40 min	0 min
40 min / 0 min	P38988	P38988	-0.181477	0.181477	0.562417	120	-0.0635334	0.0635334	P38988	GGC1	Mitochondrial GTP/GDP carrier protein 1	GGC1_YEAST	20	-11.82	0.8818	40 min	0 min
40 min / 0 min	P38989	P38989	-0.148802	0.148802	0.79101	10	0.0147205	0.0147205	P38989	SMC2	Structural maintenance of chromosomes protein 2	SMC2_YEAST	2	-9.80006	0.901999	40 min	0 min
40 min / 0 min	P38993	P38993	-0.219946	0.219946	0.645493	25	-0.0706321	0.0706321	P38993	FET3	Iron transport multicopper oxidase FET3	FET3_YEAST	4	-14.1402	0.858598	40 min	0 min
40 min / 0 min	P38996	P38996	-0.0491891	0.0491891	0.61376	60	-0.149938	0.149938	P38996	NAB3	Nuclear polyadenylated RNA-binding protein 3	NAB3_YEAST	10	-3.35206	0.966479	40 min	0 min
40 min / 0 min	P38998	P38998	-0.084647	0.084647	0.761387	155	-0.0171694	0.0171694	P38998	LYS1	Saccharopine dehydrogenase [NAD(+), L-lysine-forming]	LYS1_YEAST	24	-5.69847	0.943015	40 min	0 min
40 min / 0 min	P38999	P38999	0.015824	0.015824	0.448551	325	-0.0958749	0.0958749	P38999	LYS9	Saccharopine dehydrogenase [NADP(+), L-glutamate-forming]	LYS9_YEAST	38	1.10287	1.01103	40 min	0 min
40 min / 0 min	P39003;P39004	P39003;P39004	0.310075	0.310075	0.481061	5	0.296291	0.296291	P39003;P39004	HXT6;HXT7	High-affinity hexose transporter HXT6	HXT6_YEAST;HXT7_YEAST	1	23.9772	1.23977	40 min	0 min
40 min / 0 min	P39005	P39005	-0.215668	0.215668	0.578481	15	-0.251986	0.251986	P39005	KRE9	Cell wall synthesis protein KRE9	KRE9_YEAST	3	-13.8852	0.861148	40 min	0 min
40 min / 0 min	P39006	P39006	-0.152088	0.152088	0.585414	30	0.547399	0.547399	P39006	PSD1	Phosphatidylserine decarboxylase proenzyme 1, mitochondrial	PSD1_YEAST	5	-10.0053	0.899947	40 min	0 min
40 min / 0 min	P39007	P39007	-0.0186857	0.0186857	0.710264	70	0.0326147	0.0326147	P39007	STT3	Dolichyl-diphosphooligosaccharide--protein glycosyltransferase subunit STT3	STT3_YEAST	14	-1.28684	0.987132	40 min	0 min
40 min / 0 min	P39008	P39008	-0.113845	0.113845	0.550215	15	-0.103305	0.103305	P39008	POP2	Poly(A) ribonuclease POP2	POP2_YEAST	3	-7.58784	0.924122	40 min	0 min
40 min / 0 min	P39009	P39009	0.172233	0.172233	0.545461	20	0.473183	0.473183	P39009	DUN1	DNA damage response protein kinase DUN1	DUN1_YEAST	3	12.6801	1.1268	40 min	0 min
40 min / 0 min	P39010	P39010	-0.135807	0.135807	0.399219	55	-0.149471	0.149471	P39010	AKR1	Palmitoyltransferase AKR1	AKR1_YEAST	10	-8.98396	0.91016	40 min	0 min
40 min / 0 min	P39011	P39011	0.110492	0.110492	0.772683	25	-0.0564477	0.0564477	P39011	BEM4	Bud emergence protein 4	BEM4_YEAST	5	7.9596	1.0796	40 min	0 min
40 min / 0 min	P39012	P39012	-0.0178397	0.0178397	0.723666	15	-0.0320732	0.0320732	P39012	GAA1	GPI transamidase component GAA1	GAA1_YEAST	3	-1.22894	0.987711	40 min	0 min
40 min / 0 min	P39013	P39013	0.026922	0.026922	0.482606	45	0.209258	0.209258	P39013	END3	Actin cytoskeleton-regulatory complex protein END3	END3_YEAST	7	1.88361	1.01884	40 min	0 min
40 min / 0 min	P39015	P39015	-0.0260747	0.0260747	0.554975	130	-0.277284	0.277284	P39015	STM1	Suppressor protein STM1	STM1_YEAST	21	-1.79113	0.982089	40 min	0 min
40 min / 0 min	P39073	P39073	-0.163979	0.163979	0.638437	5	-0.17362	0.17362	P39073	SSN3	Meiotic mRNA stability protein kinase SSN3	SSN3_YEAST	1	-10.744	0.89256	40 min	0 min
40 min / 0 min	P39076	P39076	0.102814	0.102814	0.554137	135	0.0737726	0.0737726	P39076	CCT2	T-complex protein 1 subunit beta	TCPB_YEAST	21	7.38658	1.07387	40 min	0 min
40 min / 0 min	P39077	P39077	0.0285913	0.0285913	0.594486	200	-0.0624475	0.0624475	P39077	CCT3	T-complex protein 1 subunit gamma	TCPG_YEAST	32	2.00157	1.02002	40 min	0 min
40 min / 0 min	P39078	P39078	-0.0530456	0.0530456	0.331942	130	0.0892911	0.0892911	P39078	CCT4	T-complex protein 1 subunit delta	TCPD_YEAST	20	-3.61007	0.963899	40 min	0 min
40 min / 0 min	P39079	P39079	0.0817101	0.0817101	0.529	85	0.113441	0.113441	P39079	CCT6	T-complex protein 1 subunit zeta	TCPZ_YEAST	15	5.82717	1.05827	40 min	0 min
40 min / 0 min	P39081	P39081	-0.00405051	0.00405051	0.769837	30	0.0273178	0.0273178	P39081	PCF11	Protein PCF11	PCF11_YEAST	6	-0.280366	0.997196	40 min	0 min
40 min / 0 min	P39101	P39101	0.0139775	0.0139775	0.570516	75	-0.135626	0.135626	P39101	CAJ1	Protein CAJ1	CAJ1_YEAST	13	0.973557	1.00974	40 min	0 min
40 min / 0 min	P39102	P39102	0.551556	0.551556	0.306992	20	1.60807	1.60807	P39102	XDJ1	DnaJ protein homolog XDJ1	XDJ1_YEAST	4	46.5666	1.46567	40 min	0 min
40 min / 0 min	P39104	P39104	-0.0604225	0.0604225	0.780227	35	-0.0120885	0.0120885	P39104	PIK1	Phosphatidylinositol 4-kinase PIK1	PIK1_YEAST	7	-4.10168	0.958983	40 min	0 min
40 min / 0 min	P39105	P39105	-0.10881	0.10881	0.572017	35	-0.0920399	0.0920399	P39105	PLB1	Lysophospholipase 1	PLB1_YEAST	6	-7.26472	0.927353	40 min	0 min
40 min / 0 min	P39106	P39106	0.0669918	0.0669918	0.758952	45	0.0387027	0.0387027	P39106	MNN1	Alpha-1,3-mannosyltransferase MNN1	MNN1_YEAST	8	4.75302	1.04753	40 min	0 min
40 min / 0 min	P39107	P39107	0.163746	0.163746	0.666444	35	-0.0823716	0.0823716	P39107	MNN9	Mannan polymerase complexes subunit MNN9	MNN9_YEAST	6	12.0192	1.12019	40 min	0 min
40 min / 0 min	P39109	P39109	0.1131	0.1131	0.79767	160	0.00156783	0.00156783	P39109	YCF1	Metal resistance protein YCF1	YCFI_YEAST	29	8.15495	1.08155	40 min	0 min
40 min / 0 min	P39111	P39111	-0.0674123	0.0674123	0.644214	25	-0.291076	0.291076	P39111	VMA7	V-type proton ATPase subunit F	VATF_YEAST	4	-4.56518	0.954348	40 min	0 min
40 min / 0 min	P39515	P39515	-0.259381	0.259381	0.599133	5	-0.244788	0.244788	P39515	TIM17	Mitochondrial import inner membrane translocase subunit TIM17	TIM17_YEAST	1	-16.4554	0.835446	40 min	0 min
40 min / 0 min	P39516	P39516	-0.0677309	0.0677309	0.633747	120	-0.0481659	0.0481659	P39516	RPS14B	40S ribosomal protein S14-B	RS14B_YEAST	14	-4.58625	0.954138	40 min	0 min
40 min / 0 min	P39517	P39517	0.198472	0.198472	0.590854	135	0.162312	0.162312	P39517	DHH1	ATP-dependent RNA helicase DHH1	DHH1_YEAST	20	14.7482	1.14748	40 min	0 min
40 min / 0 min	P39522	P39522	0.0697446	0.0697446	0.261162	350	-0.107242	0.107242	P39522	ILV3	Dihydroxy-acid dehydratase, mitochondrial	ILV3_YEAST	32	4.95309	1.04953	40 min	0 min
40 min / 0 min	P39523	P39523	-0.102897	0.102897	0.754189	15	-0.0274515	0.0274515	P39523	YMR124W	Uncharacterized protein YMR124W	YM11_YEAST	3	-6.8839	0.931161	40 min	0 min
40 min / 0 min	P39524	P39524	-0.21417	0.21417	0.548655	45	-0.0891398	0.0891398	P39524	DRS2	Probable phospholipid-transporting ATPase DRS2	ATC3_YEAST	9	-13.7958	0.862042	40 min	0 min
40 min / 0 min	P39525	P39525	-0.227957	0.227957	0.00590195	50	-0.295133	0.295133	P39525	CEM1	3-oxoacyl-[acyl-carrier-protein] synthase homolog	CEM1_YEAST	10	-14.6157	0.853843	40 min	0 min
40 min / 0 min	P39526	P39526	-0.176348	0.176348	0.551309	20	-0.240814	0.240814	P39526	LAA1	AP-1 accessory protein LAA1	LAA1_YEAST	4	-11.506	0.88494	40 min	0 min
40 min / 0 min	P39531	P39531	0.139605	0.139605	0.600583	15	0.127055	0.127055	P39531	RCY1	Recyclin-1	RCY1_YEAST	3	10.1604	1.1016	40 min	0 min
40 min / 0 min	P39533	P39533	-0.0531219	0.0531219	0.674441	260	-0.0588959	0.0588959	P39533	ACO2	Homocitrate dehydratase, mitochondrial	ACON2_YEAST	36	-3.61517	0.963848	40 min	0 min
40 min / 0 min	P39535	P39535	0.0389227	0.0389227	0.747657	35	-0.0631587	0.0631587	P39535	PHO90	Low-affinity phosphate transporter PHO90	PHO90_YEAST	7	2.73464	1.02735	40 min	0 min
40 min / 0 min	P39538	P39538	-0.0303342	0.0303342	0.63641	20	0.367803	0.367803	P39538	UBP12	Ubiquitin carboxyl-terminal hydrolase 12	UBP12_YEAST	4	-2.08066	0.979193	40 min	0 min
40 min / 0 min	P39540	P39540	-0.00148686	0.00148686	0.792478	10	-0.00421505	0.00421505	P39540	ELO1	Elongation of fatty acids protein 1	ELO1_YEAST	2	-0.103008	0.99897	40 min	0 min
40 min / 0 min	P39543	P39543	-0.0242265	0.0242265	0.78917	10	0.0344468	0.0344468	P39543	SOP4	Protein SOP4	SOP4_YEAST	2	-1.66523	0.983348	40 min	0 min
40 min / 0 min	P39547	P39547	0.0115779	0.0115779	0.765335	5	0.0361735	0.0361735	P39547	UIP3	ULP1-interacting protein 3	UIP3_YEAST	1	0.805751	1.00806	40 min	0 min
40 min / 0 min	P39548	P39548	-0.20242	0.20242	0.545623	10	-0.200505	0.200505	P39548	YAR028W	DUP240 protein YAR028W	YAJ8_YEAST	2	-13.0909	0.869091	40 min	0 min
40 min / 0 min	P39552	P39552	0.0176662	0.0176662	0.756433	5	0.0689309	0.0689309	P39552	MST28	Multicopy suppressor of SEC21 protein 28	MST28_YEAST	1	1.23205	1.01232	40 min	0 min
40 min / 0 min	P39676	P39676	-0.00311178	0.00311178	0.448551	130	0.162574	0.162574	P39676	YHB1	Flavohemoprotein	FHP_YEAST	14	-0.21546	0.997845	40 min	0 min
40 min / 0 min	P39682	P39682	-0.389872	0.389872	0.60084	10	-0.798673	0.798673	P39682	PRP39	Pre-mRNA-processing factor 39	PRP39_YEAST	2	-23.6803	0.763197	40 min	0 min
40 min / 0 min	P39683	P39683	0.139142	0.139142	0.500343	110	-0.143017	0.143017	P39683	NPT1	Nicotinate phosphoribosyltransferase	NPT1_YEAST	17	10.125	1.10125	40 min	0 min
40 min / 0 min	P39685	P39685	-0.0848151	0.0848151	0.780377	105	-0.00538111	0.00538111	P39685	POM152	Nucleoporin POM152	PO152_YEAST	19	-5.70946	0.942905	40 min	0 min
40 min / 0 min	P39692	P39692	-0.0909969	0.0909969	0.77238	30	0.0216501	0.0216501	P39692	MET10	Sulfite reductase [NADPH] flavoprotein component	MET10_YEAST	6	-6.11262	0.938874	40 min	0 min
40 min / 0 min	P39702	P39702	0.158005	0.158005	0.737494	5	0.129732	0.129732	P39702	VPS8	Vacuolar protein sorting-associated protein 8	VPS8_YEAST	1	11.5743	1.11574	40 min	0 min
40 min / 0 min	P39704	P39704	-0.0978181	0.0978181	0.767377	10	-0.0748443	0.0748443	P39704	ERP2	Protein ERP2	ERP2_YEAST	2	-6.55548	0.934445	40 min	0 min
40 min / 0 min	P39705	P39705	-0.145885	0.145885	0.603753	85	-0.228563	0.228563	P39705	NUP60	Nucleoporin NUP60	NUP60_YEAST	15	-9.61751	0.903825	40 min	0 min
40 min / 0 min	P39714	P39714	-0.073523	0.073523	0.738791	115	-0.0581557	0.0581557	P39714	BDH1	(R,R)-butanediol dehydrogenase	BDH1_YEAST	12	-4.96855	0.950315	40 min	0 min
40 min / 0 min	P39715	P39715	0.0682309	0.0682309	0.748613	25	0.0281379	0.0281379	P39715	ECM1	Shuttling pre-60S factor ECM1	ECM1_YEAST	5	4.84303	1.04843	40 min	0 min
40 min / 0 min	P39717	P39717	0.0621556	0.0621556	0.776069	5	-0.0977427	0.0977427	P39717	GPB2	Guanine nucleotide-binding protein subunit beta 2	GPB2_YEAST	1	4.40245	1.04402	40 min	0 min
40 min / 0 min	P39719	P39719	0.0504283	0.0504283	0.760994	15	0.0471796	0.0471796	P39719	FLC2	Flavin carrier protein 2	FLC2_YEAST	3	3.55723	1.03557	40 min	0 min
40 min / 0 min	P39720	P39720	0.0364442	0.0364442	0.741221	5	0.0632964	0.0632964	P39720	OAF1	Oleate-activated transcription factor 1	OAF1_YEAST	1	2.5583	1.02558	40 min	0 min
40 min / 0 min	P39721	P39721	0.366624	0.366624	0.582479	10	0.32181	0.32181	P39721	AIM2	Protein AIM2	AIM2_YEAST	2	28.9332	1.28933	40 min	0 min
40 min / 0 min	P39722	P39722	0.00721984	0.00721984	0.800438	5	0.000918611	0.000918611	P39722	GEM1	Mitochondrial Rho GTPase 1	GEM1_YEAST	1	0.501695	1.00502	40 min	0 min
40 min / 0 min	P39723	P39723	-0.372672	0.372672	0.725935	15	-0.198474	0.198474	P39723	SPC72	Spindle pole component SPC72	SPC72_YEAST	3	-22.7649	0.772351	40 min	0 min
40 min / 0 min	P39724	P39724	0.0797405	0.0797405	0.710931	10	0.127353	0.127353	P39724	AIM1	Altered inheritance of mitochondria protein 1	AIM1_YEAST	2	5.6828	1.05683	40 min	0 min
40 min / 0 min	P39726	P39726	-0.0789671	0.0789671	0.603941	35	0.13852	0.13852	P39726	GCV3	Glycine cleavage system H protein, mitochondrial	GCSH_YEAST	5	-5.32648	0.946735	40 min	0 min
40 min / 0 min	P39727	P39727	-0.0357705	0.0357705	0.651139	25	-0.131581	0.131581	P39727	ERV46	ER-derived vesicles protein ERV46	ERV46_YEAST	5	-2.44894	0.975511	40 min	0 min
40 min / 0 min	P39729	P39729	-0.0430148	0.0430148	0.714696	60	0.0661869	0.0661869	P39729	RBG1	Ribosome-interacting GTPase 1	RBG1_YEAST	12	-2.93755	0.970625	40 min	0 min
40 min / 0 min	P39730	P39730	0.0931819	0.0931819	0.787881	180	0.00466386	0.00466386	P39730	FUN12	Eukaryotic translation initiation factor 5B	IF2P_YEAST	29	6.67203	1.06672	40 min	0 min
40 min / 0 min	P39742	P39742	0.208443	0.208443	0.745114	50	-0.0362643	0.0362643	P39742	SEC72	Translocation protein SEC72	SEC72_YEAST	7	15.544	1.15544	40 min	0 min
40 min / 0 min	P39743	P39743	0.0291692	0.0291692	0.430476	90	-0.237079	0.237079	P39743	RVS167	Reduced viability upon starvation protein 167	RV167_YEAST	14	2.04243	1.02042	40 min	0 min
40 min / 0 min	P39744	P39744	-0.0109072	0.0109072	0.631449	75	0.254162	0.254162	P39744	NOC2	Nucleolar complex protein 2	NOC2_YEAST	13	-0.753182	0.992468	40 min	0 min
40 min / 0 min	P39904	P39904	-0.0489664	0.0489664	0.470865	25	-0.564254	0.564254	P39904	VPS52	Vacuolar protein sorting-associated protein 52	VPS52_YEAST	5	-3.33714	0.966629	40 min	0 min
40 min / 0 min	P39923	P39923	-0.364774	0.364774	0.658482	25	-0.0792871	0.0792871	P39923	NPR2	Nitrogen permease regulator 2	NPR2_YEAST	5	-22.341	0.77659	40 min	0 min
40 min / 0 min	P39925	P39925	0.0721643	0.0721643	0.557757	50	0.132789	0.132789	P39925	AFG3	Mitochondrial respiratory chain complexes assembly protein AFG3	AFG3_YEAST	9	5.12926	1.05129	40 min	0 min
40 min / 0 min	P39926	P39926	-0.0535604	0.0535604	0.625138	65	-0.0970139	0.0970139	P39926	SSO2	Protein SSO2	SSO2_YEAST	10	-3.64445	0.963555	40 min	0 min
40 min / 0 min	P39927	P39927	-0.021384	0.021384	0.563715	20	-0.731771	0.731771	P39927	PTI1	Protein PTI1	PTI1_YEAST	3	-1.4713	0.985287	40 min	0 min
40 min / 0 min	P39929	P39929	-0.30235	0.30235	0.434254	15	-0.42286	0.42286	P39929	SNF7	Vacuolar-sorting protein SNF7	SNF7_YEAST	3	-18.907	0.81093	40 min	0 min
40 min / 0 min	P39931	P39931	-0.19369	0.19369	0.717174	40	0.0750068	0.0750068	P39931	SSP120	Protein SSP120	SS120_YEAST	7	-12.5634	0.874366	40 min	0 min
40 min / 0 min	P39935	P39935	0.217264	0.217264	0.463457	115	0.123043	0.123043	P39935	TIF4631	Eukaryotic initiation factor 4F subunit p150	IF4F1_YEAST	20	16.2527	1.16253	40 min	0 min
40 min / 0 min	P39936	P39936	0.1346	0.1346	0.655975	110	0.0789975	0.0789975	P39936	TIF4632	Eukaryotic initiation factor 4F subunit p130	IF4F2_YEAST	15	9.77883	1.09779	40 min	0 min
40 min / 0 min	P39938;P39939	P39938;P39939	-0.00062964	0.00062964	0.700232	25	0.184989	0.184989	P39938;P39939	RPS26A;RPS26B	40S ribosomal protein S26-A;40S ribosomal protein S26-B	RS26A_YEAST;RS26B_YEAST	3	-0.0436338	0.999564	40 min	0 min
40 min / 0 min	P39940	P39940	0.0101449	0.0101449	0.599795	140	0.0667077	0.0667077	P39940	RSP5	E3 ubiquitin-protein ligase RSP5	RSP5_YEAST	27	0.705671	1.00706	40 min	0 min
40 min / 0 min	P39954	P39954	0.283607	0.283607	0.188598	205	0.194433	0.194433	P39954	SAH1	Adenosylhomocysteinase	SAHH_YEAST	25	21.7235	1.21723	40 min	0 min
40 min / 0 min	P39956	P39956	0.476544	0.476544	0.565646	10	0.653434	0.653434	P39956	RPH1	DNA damage-responsive transcriptional repressor RPH1	RPH1_YEAST	2	39.1407	1.39141	40 min	0 min
40 min / 0 min	P39958	P39958	0.125358	0.125358	0.331942	130	0.182666	0.182666	P39958	GDI1	Rab GDP-dissociation inhibitor	GDI1_YEAST	21	9.07784	1.09078	40 min	0 min
40 min / 0 min	P39960	P39960	-0.0489058	0.0489058	0.697703	175	-0.0375742	0.0375742	P39960	BEM2	GTPase-activating protein BEM2/IPL2	BEM2_YEAST	31	-3.33308	0.966669	40 min	0 min
40 min / 0 min	P39962	P39962	0.0928921	0.0928921	0.684978	25	0.0771695	0.0771695	P39962	YCK3	Casein kinase I homolog 3	KC13_YEAST	4	6.6506	1.06651	40 min	0 min
40 min / 0 min	P39965	P39965	-0.0140122	0.0140122	0.786454	10	0.00858253	0.00858253	P39965	AIM10	Probable proline--tRNA ligase, mitochondrial	SYPM_YEAST	2	-0.966549	0.990335	40 min	0 min
40 min / 0 min	P39966	P39966	-0.10929	0.10929	0.716795	85	-0.0461282	0.0461282	P39966	PTC2	Protein phosphatase 2C homolog 2	PP2C2_YEAST	15	-7.29557	0.927044	40 min	0 min
40 min / 0 min	P39968	P39968	-0.052313	0.052313	0.750469	100	-0.0303864	0.0303864	P39968	VAC8	Vacuolar protein 8	VAC8_YEAST	16	-3.5611	0.964389	40 min	0 min
40 min / 0 min	P39969	P39969	0.149592	0.149592	0.788141	40	0.00964543	0.00964543	P39969	BOI2	Protein BOI2	BOI2_YEAST	8	10.9256	1.10926	40 min	0 min
40 min / 0 min	P39974	P39974	-0.0361063	0.0361063	0.790086	5	-0.0158614	0.0158614	P39974	YEL073C	Uncharacterized protein YEL073C	YEI3_YEAST	1	-2.47164	0.975284	40 min	0 min
40 min / 0 min	P39976	P39976	0.109606	0.109606	0.377892	230	0.156399	0.156399	P39976	DLD3	D-lactate dehydrogenase [cytochrome] 3	DLD3_YEAST	32	7.89336	1.07893	40 min	0 min
40 min / 0 min	P39979	P39979	0.239771	0.239771	0.644495	10	-0.196392	0.196392	P39979	HPA3	D-amino-acid N-acetyltransferase HPA3	HPA3_YEAST	1	18.0805	1.18081	40 min	0 min
40 min / 0 min	P39984	P39984	-0.0992775	0.0992775	0.582863	35	0.592198	0.592198	P39984	HAT2	Histone acetyltransferase type B subunit 2	HAT2_YEAST	7	-6.64997	0.9335	40 min	0 min
40 min / 0 min	P39985	P39985	-0.126692	0.126692	0.582619	70	-0.252581	0.252581	P39985	POL5	DNA polymerase V	DPO5_YEAST	13	-8.40707	0.915929	40 min	0 min
40 min / 0 min	P39986	P39986	0.0160324	0.0160324	0.511632	190	0.0923579	0.0923579	P39986	SPF1	Manganese-transporting ATPase 1	ATC6_YEAST	34	1.11748	1.01117	40 min	0 min
40 min / 0 min	P39990	P39990	-0.160893	0.160893	0.624056	30	-0.0784069	0.0784069	P39990	SNU13	13 kDa ribonucleoprotein-associated protein	SNU13_YEAST	6	-10.5529	0.894471	40 min	0 min
40 min / 0 min	P39993	P39993	-0.0668303	0.0668303	0.758777	90	0.0415304	0.0415304	P39993	GEA2	ARF guanine-nucleotide exchange factor 2	GEA2_YEAST	18	-4.52667	0.954733	40 min	0 min
40 min / 0 min	P39996	P39996	-0.154357	0.154357	0.755285	15	-0.0360189	0.0360189	P39996	GTT3	Glutathione transferase 3	GTT3_YEAST	2	-10.1467	0.898533	40 min	0 min
40 min / 0 min	P39998	P39998	0.00576245	0.00576245	0.688097	30	0.0783909	0.0783909	P39998	EDC3	Enhancer of mRNA-decapping protein 3	EDC3_YEAST	5	0.400221	1.004	40 min	0 min
40 min / 0 min	P40002	P40002	0.144321	0.144321	0.448551	10	0.15328	0.15328	P40002	MIT1	Transcriptional regulator MIT1	MIT1_YEAST	2	10.5211	1.10521	40 min	0 min
40 min / 0 min	P40005	P40005	-0.0489917	0.0489917	0.725743	25	0.177041	0.177041	P40005	GIM4	Prefoldin subunit 2	PFD2_YEAST	5	-3.33883	0.966612	40 min	0 min
40 min / 0 min	P40006	P40006	0.185867	0.185867	0.60727	20	0.300113	0.300113	P40006	IRC22	Increased recombination centers protein 22	IRC22_YEAST	3	13.75	1.1375	40 min	0 min
40 min / 0 min	P40007	P40007	-0.0238643	0.0238643	0.593302	20	0.376076	0.376076	P40007	NOP16	Nucleolar protein 16	NOP16_YEAST	4	-1.64054	0.983595	40 min	0 min
40 min / 0 min	P40008	P40008	0.0381534	0.0381534	0.519654	50	0.591293	0.591293	P40008	FMP52	Protein FMP52, mitochondrial	FMP52_YEAST	8	2.67987	1.0268	40 min	0 min
40 min / 0 min	P40009	P40009	-0.68416	0.68416	0.590403	10	-0.411396	0.411396	P40009	YND1	Golgi apyrase	YND1_YEAST	2	-37.7632	0.622368	40 min	0 min
40 min / 0 min	P40010	P40010	0.0742264	0.0742264	0.72898	125	-0.0490689	0.0490689	P40010	NUG1	Nuclear GTP-binding protein NUG1	NUG1_YEAST	21	5.27963	1.0528	40 min	0 min
40 min / 0 min	P40011	P40011	-0.11472	0.11472	0.528333	10	-0.112024	0.112024	P40011	YER010C	4-hydroxy-4-methyl-2-oxoglutarate aldolase	RRAAH_YEAST	2	-7.64382	0.923562	40 min	0 min
40 min / 0 min	P40012	P40012	0.0334982	0.0334982	0.591435	35	0.211368	0.211368	P40012	HEM14	Protoporphyrinogen oxidase	PPOX_YEAST	7	2.34909	1.02349	40 min	0 min
40 min / 0 min	P40013	P40013	-0.604976	0.604976	0.604903	5	-1.47033	1.47033	P40013	BIM1	Protein BIM1	BIM1_YEAST	1	-34.2518	0.657482	40 min	0 min
40 min / 0 min	P40014	P40014	-0.0857764	0.0857764	0.651139	10	-0.0832972	0.0832972	P40014	SPC25	Kinetochore protein SPC25	SPC25_YEAST	2	-5.77227	0.942277	40 min	0 min
40 min / 0 min	P40015	P40015	-0.0542962	0.0542962	0.729616	15	-0.0378328	0.0378328	P40015	ISC1	Inositol phosphosphingolipids phospholipase C	ISC1_YEAST	3	-3.69358	0.963064	40 min	0 min
40 min / 0 min	P40016	P40016	0.180849	0.180849	0.567702	90	0.0878715	0.0878715	P40016	RPN3	26S proteasome regulatory subunit RPN3	RPN3_YEAST	13	13.355	1.13355	40 min	0 min
40 min / 0 min	P40017	P40017	-0.0611136	0.0611136	0.532561	50	-0.104605	0.104605	P40017	YAT2	Carnitine O-acetyltransferase YAT2	YAT2_YEAST	10	-4.1476	0.958524	40 min	0 min
40 min / 0 min	P40018	P40018	-0.125541	0.125541	0.559445	15	-0.169505	0.169505	P40018	SMB1	Small nuclear ribonucleoprotein-associated protein B	RSMB_YEAST	3	-8.33398	0.91666	40 min	0 min
40 min / 0 min	P40019	P40019	-0.240319	0.240319	0.749002	10	-0.0556806	0.0556806	P40019	CHZ1	Histone H2A.Z-specific chaperone CHZ1	CHZ1_YEAST	1	-15.3442	0.846558	40 min	0 min
40 min / 0 min	P40024	P40024	0.0477286	0.0477286	0.656538	185	0.0594327	0.0594327	P40024	ARB1	ABC transporter ATP-binding protein ARB1	ARB1_YEAST	25	3.36363	1.03364	40 min	0 min
40 min / 0 min	P40029	P40029	0.00295284	0.00295284	0.736137	30	0.168713	0.168713	P40029	MXR1	Peptide methionine sulfoxide reductase	MSRA_YEAST	4	0.204885	1.00205	40 min	0 min
40 min / 0 min	P40030	P40030	0.0141988	0.0141988	0.550572	20	0.705143	0.705143	P40030	ERG28	Ergosterol biosynthetic protein 28	ERG28_YEAST	3	0.989048	1.00989	40 min	0 min
40 min / 0 min	P40032	P40032	0.0568227	0.0568227	0.529083	105	0.0906292	0.0906292	P40032	TPA1	Prolyl 3,4-dihydroxylase TPA1	TPA1_YEAST	18	4.01724	1.04017	40 min	0 min
40 min / 0 min	P40033	P40033	0.0219853	0.0219853	0.676426	10	0.100284	0.100284	P40033	RSM18	37S ribosomal protein RSM18, mitochondrial	RSM18_YEAST	2	1.53557	1.01536	40 min	0 min
40 min / 0 min	P40035	P40035	0.232575	0.232575	0.670541	5	0.22949	0.22949	P40035	PIC2	Mitochondrial phosphate carrier protein 2	PIC2_YEAST	1	17.493	1.17493	40 min	0 min
40 min / 0 min	P40037	P40037	-0.206822	0.206822	0.631051	50	-0.0861966	0.0861966	P40037	HMF1	Protein HMF1	HMF1_YEAST	8	-13.3556	0.866444	40 min	0 min
40 min / 0 min	P40038	P40038	-0.150031	0.150031	0.613315	10	-0.162811	0.162811	P40038	PCL6	PHO85 cyclin-6	PCL6_YEAST	2	-9.87692	0.901231	40 min	0 min
40 min / 0 min	P40040	P40040	-0.124976	0.124976	0.752894	35	-0.0320205	0.0320205	P40040	THO1	Protein THO1	THO1_YEAST	7	-8.2981	0.917019	40 min	0 min
40 min / 0 min	P40045	P40045	-0.227101	0.227101	0.697285	10	-0.100664	0.100664	P40045	TDA2	Topoisomerase I damage affected protein 2	TDA2_YEAST	2	-14.565	0.85435	40 min	0 min
40 min / 0 min	P40047	P40047	-0.0764044	0.0764044	0.373928	145	-0.168072	0.168072	P40047	ALD5	Aldehyde dehydrogenase 5, mitochondrial	ALDH5_YEAST	22	-5.15815	0.948418	40 min	0 min
40 min / 0 min	P40051	P40051	-0.0685745	0.0685745	0.775864	25	0.0265475	0.0265475	P40051	ICP55	Intermediate cleaving peptidase 55	ICP55_YEAST	5	-4.64203	0.95358	40 min	0 min
40 min / 0 min	P40052	P40052	-0.00622298	0.00622298	0.754142	10	-0.0254459	0.0254459	P40052	YER079W	Uncharacterized protein YER079W	YEQ9_YEAST	2	-0.430415	0.995696	40 min	0 min
40 min / 0 min	P40053	P40053	0.0460472	0.0460472	0.688559	120	0.11374	0.11374	P40053	AIM9	Altered inheritance of mitochondria protein 9, mitochondrial	AIM9_YEAST	23	3.24323	1.03243	40 min	0 min
40 min / 0 min	P40054	P40054	-0.000796345	0.000796345	0.559173	55	0.0722038	0.0722038	P40054	SER3	D-3-phosphoglycerate dehydrogenase 1	SERA_YEAST	7	-0.0551832	0.999448	40 min	0 min
40 min / 0 min	P40055	P40055	-0.0677474	0.0677474	0.670141	60	-0.137672	0.137672	P40055	UTP7	U3 small nucleolar RNA-associated protein 7	UTP7_YEAST	10	-4.58734	0.954127	40 min	0 min
40 min / 0 min	P40056	P40056	-0.151197	0.151197	0.517418	20	-0.263554	0.263554	P40056	GET2	Golgi to ER traffic protein 2	GET2_YEAST	4	-9.94971	0.900503	40 min	0 min
40 min / 0 min	P40059	P40059	-0.139291	0.139291	0.386056	25	-0.270223	0.270223	P40059	DOT6	Transcriptional regulatory protein DOT6	DOT6_YEAST	5	-9.20348	0.907965	40 min	0 min
40 min / 0 min	P40060	P40060	-0.434394	0.434394	0.607382	5	-0.733529	0.733529	P40060	IES5	Ino eighty subunit 5	IES5_YEAST	1	-25.9996	0.740004	40 min	0 min
40 min / 0 min	P40061	P40061	-0.0927168	0.0927168	0.784036	5	-0.0326578	0.0326578	P40061	TSC11	Target of rapamycin complex 2 subunit TSC11	TSC11_YEAST	1	-6.22448	0.937755	40 min	0 min
40 min / 0 min	P40064	P40064	-0.0519999	0.0519999	0.787838	105	-0.00637431	0.00637431	P40064	NUP157	Nucleoporin NUP157	NU157_YEAST	21	-3.54017	0.964598	40 min	0 min
40 min / 0 min	P40066	P40066	-0.0836731	0.0836731	0.799837	50	-0.00187399	0.00187399	P40066	GLE2	Nucleoporin GLE2	GLE2_YEAST	8	-5.63479	0.943652	40 min	0 min
40 min / 0 min	P40069	P40069	0.0744539	0.0744539	0.507128	235	0.094544	0.094544	P40069	KAP123	Importin subunit beta-4	IMB4_YEAST	35	5.29624	1.05296	40 min	0 min
40 min / 0 min	P40070	P40070	0.0967941	0.0967941	0.750425	25	0.0528288	0.0528288	P40070	LSM4	U6 snRNA-associated Sm-like protein LSm4	LSM4_YEAST	4	6.93945	1.06939	40 min	0 min
40 min / 0 min	P40071	P40071	-0.0419022	0.0419022	0.625103	10	-0.0948423	0.0948423	P40071	TMN3	Transmembrane 9 superfamily member 3	TMN3_YEAST	2	-2.86266	0.971373	40 min	0 min
40 min / 0 min	P40073	P40073	-0.021616	0.021616	0.788289	5	-0.0122557	0.0122557	P40073	SHO1	High osmolarity signaling protein SHO1	SHO1_YEAST	1	-1.48714	0.985129	40 min	0 min
40 min / 0 min	P40075	P40075	-0.121452	0.121452	0.625644	60	-0.0712348	0.0712348	P40075	SCS2	Vesicle-associated membrane protein-associated protein SCS2	SCS2_YEAST	11	-8.07378	0.919262	40 min	0 min
40 min / 0 min	P40078	P40078	0.037001	0.037001	0.582479	40	-0.187616	0.187616	P40078	NSA2	Ribosome biogenesis protein NSA2	NSA2_YEAST	7	2.59788	1.02598	40 min	0 min
40 min / 0 min	P40079	P40079	0.188469	0.188469	0.450867	40	0.31485	0.31485	P40079	LCP5	U3 small nucleolar ribonucleoprotein protein LCP5	LCP5_YEAST	8	13.9553	1.13955	40 min	0 min
40 min / 0 min	P40080	P40080	0.809128	0.809128	0.521543	5	1.17076	1.17076	P40080	VFA1	VPS4-associated protein 1	VFA1_YEAST	1	75.2152	1.75215	40 min	0 min
40 min / 0 min	P40081	P40081	-0.119769	0.119769	0.548437	50	-0.252075	0.252075	P40081	YER134C	Putative magnesium-dependent phosphatase YER134C	MGDP1_YEAST	8	-7.96653	0.920335	40 min	0 min
40 min / 0 min	P40084	P40084	-0.0147789	0.0147789	0.775631	10	0.0397245	0.0397245	P40084	RTR1	RNA polymerase II subunit B1 CTD phosphatase RTR1	RTR1_YEAST	3	-1.01916	0.989808	40 min	0 min
40 min / 0 min	P40086	P40086	-0.0930681	0.0930681	0.767401	30	-0.055083	0.055083	P40086	COX15	Cytochrome c oxidase assembly protein COX15	COX15_YEAST	6	-6.24731	0.937527	40 min	0 min
40 min / 0 min	P40087	P40087	0.0207431	0.0207431	0.731999	35	-0.0217086	0.0217086	P40087	DDI1	DNA damage-inducible protein 1	DDI1_YEAST	7	1.44819	1.01448	40 min	0 min
40 min / 0 min	P40088	P40088	0.0114212	0.0114212	0.714696	15	-0.058073	0.058073	P40088	FTR1	Plasma membrane iron permease	FTR1_YEAST	3	0.794798	1.00795	40 min	0 min
40 min / 0 min	P40089	P40089	-0.0826893	0.0826893	0.651943	25	-0.102676	0.102676	P40089	LSM5	U6 snRNA-associated Sm-like protein LSm5	LSM5_YEAST	3	-5.57043	0.944296	40 min	0 min
40 min / 0 min	P40091	P40091	-0.0546502	0.0546502	0.520493	25	-0.114562	0.114562	P40091	PEA2	Protein PEA2	PEA2_YEAST	5	-3.71721	0.962828	40 min	0 min
40 min / 0 min	P40093	P40093	0.000700515	0.000700515	0.529083	75	0.118536	0.118536	P40093	YER156C	UPF0160 protein YER156C	YEY6_YEAST	14	0.0485678	1.00049	40 min	0 min
40 min / 0 min	P40094	P40094	-0.111926	0.111926	0.607992	45	-0.173545	0.173545	P40094	COG3	Conserved oligomeric Golgi complex subunit 3	COG3_YEAST	9	-7.46479	0.925352	40 min	0 min
40 min / 0 min	P40096	P40096	0.0150684	0.0150684	0.797203	20	-0.00175203	0.00175203	P40096	BUR6	Negative cofactor 2 complex subunit alpha	NCB1_YEAST	4	1.04994	1.0105	40 min	0 min
40 min / 0 min	P40098	P40098	-0.0213347	0.0213347	0.636058	10	-0.0597353	0.0597353	P40098	FMP10	Uncharacterized mitochondrial membrane protein FMP10	FMP10_YEAST	2	-1.46793	0.985321	40 min	0 min
40 min / 0 min	P40099	P40099	0.326859	0.326859	0.582717	10	0.587906	0.587906	P40099	FAU1	5-formyltetrahydrofolate cyclo-ligase	FTHC_YEAST	2	25.428	1.25428	40 min	0 min
40 min / 0 min	P40106	P40106	0.388577	0.388577	0.783165	45	0.0212653	0.0212653	P40106	GPP2	Glycerol-1-phosphate phosphohydrolase 2	GPP2_YEAST	9	30.9102	1.3091	40 min	0 min
40 min / 0 min	P40150	P40150	0.0353352	0.0353352	0.744014	20	0.0554457	0.0554457	P40150	SSB2	Heat shock protein SSB2	HSP76_YEAST	3	2.47949	1.02479	40 min	0 min
40 min / 0 min	P40154	P40154	-0.100502	0.100502	0.690106	5	-0.0916993	0.0916993	P40154	IES2	Ino eighty subunit 2	IES2_YEAST	1	-6.72919	0.932708	40 min	0 min
40 min / 0 min	P40157	P40157	-0.0300858	0.0300858	0.617255	70	0.0729522	0.0729522	P40157	VID27	Vacuolar import and degradation protein 27	VID27_YEAST	14	-2.06379	0.979362	40 min	0 min
40 min / 0 min	P40159	P40159	0.136603	0.136603	0.681395	30	0.0947041	0.0947041	P40159	YNL208W	Uncharacterized protein YNL208W	YNU8_YEAST	4	9.93138	1.09931	40 min	0 min
40 min / 0 min	P40160	P40160	-0.235093	0.235093	0.587813	70	-0.09755	0.09755	P40160	RIO2	Serine/threonine-protein kinase RIO2	RIO2_YEAST	12	-15.037	0.84963	40 min	0 min
40 min / 0 min	P40161	P40161	-0.0811733	0.0811733	0.25233	40	-0.193106	0.193106	P40161	RTT106	Histone chaperone RTT106	RT106_YEAST	8	-5.47114	0.945289	40 min	0 min
40 min / 0 min	P40164	P40164	-0.109561	0.109561	0.677147	20	-0.136701	0.136701	P40164	PSY2	Serine/threonine-protein phosphatase 4 regulatory subunit 3	PP4R3_YEAST	4	-7.31298	0.92687	40 min	0 min
40 min / 0 min	P40165	P40165	-0.20565	0.20565	0.614206	10	-0.205676	0.205676	P40165	YNL200C	NAD(P)H-hydrate epimerase	NNRE_YEAST	2	-13.2852	0.867148	40 min	0 min
40 min / 0 min	P40185	P40185	-0.109542	0.109542	0.451099	40	-0.132736	0.132736	P40185	MMF1	Protein MMF1, mitochondrial	MMF1_YEAST	6	-7.31177	0.926882	40 min	0 min
40 min / 0 min	P40202	P40202	-0.0282089	0.0282089	0.55047	70	-0.214547	0.214547	P40202	CCS1	Superoxide dismutase 1 copper chaperone	CCS1_YEAST	12	-1.9363	0.980637	40 min	0 min
40 min / 0 min	P40204	P40204	-0.106709	0.106709	0.655975	5	-0.127476	0.127476	P40204	SMX2	Small nuclear ribonucleoprotein G	RUXG_YEAST	1	-7.1296	0.928704	40 min	0 min
40 min / 0 min	P40206	P40206	0.122025	0.122025	0.551309	5	0.125923	0.125923	P40206	JLP2	Protein JLP2	JLP2_YEAST	1	8.82611	1.08826	40 min	0 min
40 min / 0 min	P40208	P40208	0.0158849	0.0158849	0.74377	15	-0.027733	0.027733	P40208	GID8	Glucose-induced degradation protein 8	GID8_YEAST	3	1.10714	1.01107	40 min	0 min
40 min / 0 min	P40210	P40210	0.011664	0.011664	0.668402	20	-0.129437	0.129437	P40210	SIP5	Protein SIP5	SIP5_YEAST	4	0.811763	1.00812	40 min	0 min
40 min / 0 min	P40212	P40212	0.139563	0.139563	0.547637	105	0.157713	0.157713	P40212	RPL13B	60S ribosomal protein L13-B	RL13B_YEAST	14	10.1572	1.10157	40 min	0 min
40 min / 0 min	P40214	P40214	-0.289912	0.289912	0.610445	10	-0.363485	0.363485	P40214	YMR144W	Uncharacterized protein YMR144W	YM22_YEAST	2	-18.2048	0.817952	40 min	0 min
40 min / 0 min	P40215	P40215	-0.00688996	0.00688996	0.647806	65	-0.0556869	0.0556869	P40215	NDE1	External NADH-ubiquinone oxidoreductase 1, mitochondrial	NDH1_YEAST	12	-0.476437	0.995236	40 min	0 min
40 min / 0 min	P40217	P40217	-0.00273599	0.00273599	0.588889	100	0.0660833	0.0660833	P40217	TIF34	Eukaryotic translation initiation factor 3 subunit I	EIF3I_YEAST	19	-0.189465	0.998105	40 min	0 min
40 min / 0 min	P40302	P40302	-0.0670196	0.0670196	0.539143	90	-0.198192	0.198192	P40302	PRE5	Proteasome subunit alpha type-6	PSA6_YEAST	15	-4.5392	0.954608	40 min	0 min
40 min / 0 min	P40303	P40303	-0.0552606	0.0552606	0.552105	40	-0.11652	0.11652	P40303	PRE6	Proteasome subunit alpha type-4	PSA4_YEAST	8	-3.75794	0.962421	40 min	0 min
40 min / 0 min	P40308	P40308	-0.110886	0.110886	0.595261	15	-0.126474	0.126474	P40308	TGL3	Lipase 3	TGL3_YEAST	3	-7.3981	0.926019	40 min	0 min
40 min / 0 min	P40312	P40312	0.0285802	0.0285802	0.618277	10	0.230286	0.230286	P40312	CYB5	Cytochrome b5	CYB5_YEAST	2	2.00078	1.02001	40 min	0 min
40 min / 0 min	P40317	P40317	0.194222	0.194222	0.578133	20	0.316198	0.316198	P40317	SOK1	Protein SOK1	SOK1_YEAST	4	14.4107	1.14411	40 min	0 min
40 min / 0 min	P40318	P40318	-0.0317931	0.0317931	0.765581	75	-0.0388224	0.0388224	P40318	SSM4	ERAD-associated E3 ubiquitin-protein ligase DOA10	DOA10_YEAST	12	-2.17963	0.978204	40 min	0 min
40 min / 0 min	P40319	P40319	-0.126063	0.126063	0.786489	30	-0.0162207	0.0162207	P40319	ELO3	Elongation of fatty acids protein 3	ELO3_YEAST	5	-8.36711	0.916329	40 min	0 min
40 min / 0 min	P40325	P40325	-0.234797	0.234797	0.449477	5	-0.238323	0.238323	P40325	HUA1	Proline-rich protein HUA1	HUA1_YEAST	1	-15.0195	0.849805	40 min	0 min
40 min / 0 min	P40327	P40327	0.0664217	0.0664217	0.65482	95	0.0481753	0.0481753	P40327	RPT2	26S protease regulatory subunit 4 homolog	PRS4_YEAST	15	4.71163	1.04712	40 min	0 min
40 min / 0 min	P40328	P40328	-0.00766982	0.00766982	0.721548	40	0.0905322	0.0905322	P40328	YTA6	Probable 26S protease subunit YTA6	TBP6_YEAST	9	-0.530221	0.994698	40 min	0 min
40 min / 0 min	P40335	P40335	-0.16042	0.16042	0.548655	10	-0.316965	0.316965	P40335	PEP8	Carboxypeptidase Y-deficient protein 8	PEP8_YEAST	2	-10.5236	0.894764	40 min	0 min
40 min / 0 min	P40339	P40339	-0.147019	0.147019	0.685174	50	-0.0730578	0.0730578	P40339	RFC4	Replication factor C subunit 4	RFC4_YEAST	10	-9.68853	0.903115	40 min	0 min
40 min / 0 min	P40340	P40340	0.459799	0.459799	0.532561	45	0.203322	0.203322	P40340	YTA7	Tat-binding homolog 7	TBP7_YEAST	9	37.535	1.37535	40 min	0 min
40 min / 0 min	P40341	P40341	0.0617949	0.0617949	0.644282	65	0.0983097	0.0983097	P40341	YTA12	Mitochondrial respiratory chain complexes assembly protein YTA12	YTA12_YEAST	13	4.37636	1.04376	40 min	0 min
40 min / 0 min	P40343	P40343	0.0146733	0.0146733	0.706819	55	0.166399	0.166399	P40343	VPS27	Vacuolar protein sorting-associated protein 27	VPS27_YEAST	10	1.02226	1.01022	40 min	0 min
40 min / 0 min	P40344	P40344	-0.0387447	0.0387447	0.74812	5	-0.0378311	0.0378311	P40344	ATG3	Autophagy-related protein 3	ATG3_YEAST	1	-2.64984	0.973502	40 min	0 min
40 min / 0 min	P40345	P40345	-0.0582197	0.0582197	0.551309	35	-0.158863	0.158863	P40345	LRO1	Phospholipid:diacylglycerol acyltransferase	PDAT_YEAST	6	-3.95514	0.960449	40 min	0 min
40 min / 0 min	P40347	P40347	-0.00289564	0.00289564	0.690106	25	0.0912707	0.0912707	P40347	LTP1	Low molecular weight phosphotyrosine protein phosphatase	PPAL_YEAST	4	-0.200509	0.997995	40 min	0 min
40 min / 0 min	P40348	P40348	0.0207013	0.0207013	0.797142	75	-0.00332807	0.00332807	P40348	RFC2	Replication factor C subunit 2	RFC2_YEAST	14	1.44525	1.01445	40 min	0 min
40 min / 0 min	P40350	P40350	-0.0514798	0.0514798	0.652017	10	-0.0777673	0.0777673	P40350	ALG5	Dolichyl-phosphate beta-glucosyltransferase	ALG5_YEAST	2	-3.50539	0.964946	40 min	0 min
40 min / 0 min	P40354	P40354	0.0223485	0.0223485	0.726838	30	-0.0654469	0.0654469	P40354	NTA1	Protein N-terminal amidase	NTA1_YEAST	6	1.56114	1.01561	40 min	0 min
40 min / 0 min	P40356	P40356	-0.0517495	0.0517495	0.613978	20	-0.148546	0.148546	P40356	PGD1	Mediator of RNA polymerase II transcription subunit 3	MED3_YEAST	4	-3.52343	0.964766	40 min	0 min
40 min / 0 min	P40357	P40357	-0.12904	0.12904	0.473526	40	-0.137227	0.137227	P40357	SEC9	Protein transport protein SEC9	SEC9_YEAST	8	-8.55605	0.914439	40 min	0 min
40 min / 0 min	P40358	P40358	0.151559	0.151559	0.758417	10	-0.0973174	0.0973174	P40358	JEM1	DnaJ-like chaperone JEM1	JEM1_YEAST	2	11.0769	1.11077	40 min	0 min
40 min / 0 min	P40359	P40359	-0.206485	0.206485	0.529	5	-0.209	0.209	P40359	PSF2	DNA replication complex GINS protein PSF2	PSF2_YEAST	1	-13.3354	0.866646	40 min	0 min
40 min / 0 min	P40361	P40361	-0.0912081	0.0912081	0.688908	5	-0.107877	0.107877	P40361	YJL070C	Inactive deaminase YJL070C	YJH0_YEAST	3	-6.12637	0.938736	40 min	0 min
40 min / 0 min	P40362	P40362	-0.0366626	0.0366626	0.727739	25	0.106359	0.106359	P40362	UTP18	U3 small nucleolar RNA-associated protein 18	UTP18_YEAST	5	-2.50924	0.974908	40 min	0 min
40 min / 0 min	P40363	P40363	0.0309892	0.0309892	0.72105	45	0.0306293	0.0306293	P40363	YJL068C	S-formylglutathione hydrolase	SFGH_YEAST	8	2.17124	1.02171	40 min	0 min
40 min / 0 min	P40364	P40364	-0.173346	0.173346	0.305768	25	-0.432311	0.432311	P40364	MPM1	Mitochondrial peculiar membrane protein 1	MPM1_YEAST	5	-11.3217	0.886783	40 min	0 min
40 min / 0 min	P40366	P40366	-0.266143	0.266143	0.232783	10	-0.345017	0.345017	P40366	DLS1	Protein DLS1	DLS1_YEAST	2	-16.8461	0.831539	40 min	0 min
40 min / 0 min	P40367	P40367	-0.775553	0.775553	0.519654	10	-0.999594	0.999594	P40367	LAS21	GPI ethanolamine phosphate transferase 2	GPI7_YEAST	2	-41.5836	0.584164	40 min	0 min
40 min / 0 min	P40368	P40368	-0.0486329	0.0486329	0.758786	45	0.0467552	0.0467552	P40368	NUP82	Nucleoporin NUP82	NUP82_YEAST	8	-3.31479	0.966852	40 min	0 min
40 min / 0 min	P40395	P40395	0.448875	0.448875	0.653713	5	0.495216	0.495216	P40395	RIC1	Guanine nucleotide exchange factor subunit RIC1	RIC1_YEAST	1	36.4975	1.36498	40 min	0 min
40 min / 0 min	P40413	P40413	0.11177	0.11177	0.481106	135	0.10435	0.10435	P40413	CCT5	T-complex protein 1 subunit epsilon	TCPE_YEAST	18	8.0553	1.08055	40 min	0 min
40 min / 0 min	P40414	P40414	-0.223438	0.223438	0.661362	75	-0.164038	0.164038	P40414	TPM2	Tropomyosin-2	TPM2_YEAST	13	-14.3478	0.856522	40 min	0 min
40 min / 0 min	P40416	P40416	0.27143	0.27143	0.701133	20	0.161314	0.161314	P40416	ATM1	Iron-sulfur clusters transporter ATM1, mitochondrial	ATM1_YEAST	4	20.7003	1.207	40 min	0 min
40 min / 0 min	P40422	P40422	-0.0189789	0.0189789	0.607992	15	-0.316932	0.316932	P40422	RPC10	DNA-directed RNA polymerases I, II, and III subunit RPABC4	RPAB4_YEAST	3	-1.3069	0.986931	40 min	0 min
40 min / 0 min	P40433	P40433	0.254612	0.254612	0.463457	5	0.241465	0.241465	P40433	PFK26	6-phosphofructo-2-kinase 1	6P21_YEAST	1	19.3015	1.19301	40 min	0 min
40 min / 0 min	P40452	P40452	-0.0980284	0.0980284	0.574158	15	-0.0919511	0.0919511	P40452	COA1	Cytochrome c oxidase assembly factor 1	COA1_YEAST	3	-6.56911	0.934309	40 min	0 min
40 min / 0 min	P40453	P40453	0.162911	0.162911	0.757664	20	0.0362334	0.0362334	P40453	UBP7	Ubiquitin carboxyl-terminal hydrolase 7	UBP7_YEAST	4	11.9544	1.11954	40 min	0 min
40 min / 0 min	P40457	P40457	0.175439	0.175439	0.448551	70	0.294374	0.294374	P40457	MLP2	Protein MLP2	MLP2_YEAST	15	12.9308	1.12931	40 min	0 min
40 min / 0 min	P40459	P40459	-0.120097	0.120097	0.511632	30	-0.091028	0.091028	P40459	PAN6	Pantoate--beta-alanine ligase	PANC_YEAST	6	-7.98743	0.920126	40 min	0 min
40 min / 0 min	P40460	P40460	0.00568293	0.00568293	0.792478	15	0.0330005	0.0330005	P40460	NDC80	Kinetochore protein NDC80	NDC80_YEAST	3	0.394687	1.00395	40 min	0 min
40 min / 0 min	P40462	P40462	0.102696	0.102696	0.749137	85	-0.0147549	0.0147549	P40462	TMA108	Protein TMA108	TM108_YEAST	17	7.37779	1.07378	40 min	0 min
40 min / 0 min	P40463	P40463	-0.090971	0.090971	0.770206	10	-0.0272766	0.0272766	P40463	VHS2	Protein VHS2	VHS2_YEAST	2	-6.11094	0.938891	40 min	0 min
40 min / 0 min	P40466	P40466	0.0998847	0.0998847	0.618277	20	-0.28929	0.28929	P40466	FKH1	Fork head protein homolog 1	FKH1_YEAST	4	7.16878	1.07169	40 min	0 min
40 min / 0 min	P40467	P40467	-0.130698	0.130698	0.424549	40	-0.221639	0.221639	P40467	ASG1	Activator of stress genes 1	ASG1_YEAST	8	-8.66108	0.913389	40 min	0 min
40 min / 0 min	P40468	P40468	-0.0382568	0.0382568	0.588962	30	0.294931	0.294931	P40468	TAO3	Cell morphogenesis protein PAG1	TAO3_YEAST	6	-2.61691	0.973831	40 min	0 min
40 min / 0 min	P40469	P40469	-0.216733	0.216733	0.725434	30	0.136116	0.136116	P40469	MET18	DNA repair/transcription protein MET18/MMS19	MET18_YEAST	6	-13.9488	0.860512	40 min	0 min
40 min / 0 min	P40471	P40471	-0.102513	0.102513	0.722294	45	-0.0371485	0.0371485	P40471	AYR1	NADPH-dependent 1-acyldihydroxyacetone phosphate reductase	AYR1_YEAST	9	-6.85906	0.931409	40 min	0 min
40 min / 0 min	P40472	P40472	0.250392	0.250392	0.462382	5	0.23983	0.23983	P40472	SIM1	Probable secreted beta-glucosidase SIM1	SIM1_YEAST	1	18.953	1.18953	40 min	0 min
40 min / 0 min	P40474	P40474	-0.0234418	0.0234418	0.751235	30	0.0461457	0.0461457	P40474	QDR2	Quinidine resistance protein 2	QDR2_YEAST	6	-1.61173	0.983883	40 min	0 min
40 min / 0 min	P40476	P40476	0.41421	0.41421	0.756738	5	-0.135333	0.135333	P40476	PRM5	Pheromone-regulated membrane protein 5	PRM5_YEAST	1	33.2569	1.33257	40 min	0 min
40 min / 0 min	P40477	P40477	0.124238	0.124238	0.55704	120	0.120826	0.120826	P40477	NUP159	Nucleoporin NUP159	NU159_YEAST	23	8.99317	1.08993	40 min	0 min
40 min / 0 min	P40481	P40481	-0.0875852	0.0875852	0.7226	20	-0.059233	0.059233	P40481	HPM1	Histidine protein methyltransferase 1	HPM1_YEAST	4	-5.89033	0.941097	40 min	0 min
40 min / 0 min	P40482	P40482	-0.0572348	0.0572348	0.617857	180	0.0468619	0.0468619	P40482	SEC24	Protein transport protein SEC24	SEC24_YEAST	27	-3.88955	0.961105	40 min	0 min
40 min / 0 min	P40483	P40483	0.144091	0.144091	0.561694	65	0.119076	0.119076	P40483	YIL108W	Putative zinc metalloproteinase YIL108W	YIK8_YEAST	10	10.5035	1.10503	40 min	0 min
40 min / 0 min	P40484	P40484	-0.0768954	0.0768954	0.685874	10	-0.144575	0.144575	P40484	MOB1	DBF2 kinase activator protein MOB1	MOB1_YEAST	2	-5.19043	0.948096	40 min	0 min
40 min / 0 min	P40485	P40485	-0.0566876	0.0566876	0.60802	15	-0.105076	0.105076	P40485	SLM1	Phosphatidylinositol 4,5-bisphosphate-binding protein SLM1	SLM1_YEAST	3	-3.85309	0.961469	40 min	0 min
40 min / 0 min	P40486	P40486	-0.0710755	0.0710755	0.775502	15	-0.0453096	0.0453096	P40486	SHQ1	Protein SHQ1	SHQ1_YEAST	3	-4.80719	0.951928	40 min	0 min
40 min / 0 min	P40487	P40487	0.169731	0.169731	0.620659	25	-0.434756	0.434756	P40487	DPH1	Diphthamide biosynthesis protein 1	DPH1_YEAST	5	12.4849	1.12485	40 min	0 min
40 min / 0 min	P40491	P40491	-0.0182109	0.0182109	0.625724	15	-0.723184	0.723184	P40491	FMC1	ATP synthase assembly factor FMC1, mitochondrial	FMC1_YEAST	3	-1.25435	0.987457	40 min	0 min
40 min / 0 min	P40492	P40492	-0.126041	0.126041	0.748872	5	-0.070973	0.070973	P40492	FYV10	Protein FYV10	FYV10_YEAST	1	-8.36575	0.916343	40 min	0 min
40 min / 0 min	P40493	P40493	-0.165111	0.165111	0.606175	5	-0.158592	0.158592	P40493	BMT5	25S rRNA (uridine(2634)-N(3))-methyltransferase	BMT5_YEAST	1	-10.814	0.89186	40 min	0 min
40 min / 0 min	P40494	P40494	0.561853	0.561853	0.694601	10	-0.377488	0.377488	P40494	PRK1	Actin-regulating kinase PRK1	PRK1_YEAST	2	47.6163	1.47616	40 min	0 min
40 min / 0 min	P40495	P40495	-0.0293641	0.0293641	0.702524	180	-0.0203042	0.0203042	P40495	LYS12	Homoisocitrate dehydrogenase, mitochondrial	LYS12_YEAST	26	-2.01479	0.979852	40 min	0 min
40 min / 0 min	P40496	P40496	-0.0570768	0.0570768	0.604512	30	-0.250226	0.250226	P40496	RSM25	37S ribosomal protein S25, mitochondrial	RT25_YEAST	5	-3.87902	0.96121	40 min	0 min
40 min / 0 min	P40498	P40498	-0.0656725	0.0656725	0.776524	50	-0.0234553	0.0234553	P40498	UTP25	U3 small nucleolar RNA-associated protein 25	UTP25_YEAST	10	-4.45002	0.9555	40 min	0 min
40 min / 0 min	P40499	P40499	0.136898	0.136898	0.681393	10	-0.132123	0.132123	P40499	ICE2	Protein ICE2	ICE2_YEAST	2	9.95381	1.09954	40 min	0 min
40 min / 0 min	P40501	P40501	0.157763	0.157763	0.652247	10	0.165048	0.165048	P40501	AVT7	Vacuolar amino acid transporter 7	AVT7_YEAST	2	11.5556	1.11556	40 min	0 min
40 min / 0 min	P40504	P40504	0.119139	0.119139	0.77939	15	0.050992	0.050992	P40504	KTR7	Probable mannosyltransferase KTR7	KTR7_YEAST	3	8.60866	1.08609	40 min	0 min
40 min / 0 min	P40505	P40505	-0.0667257	0.0667257	0.582479	25	-0.206794	0.206794	P40505	SDS3	Transcriptional regulatory protein SDS3	SDS3_YEAST	5	-4.51975	0.954803	40 min	0 min
40 min / 0 min	P40506	P40506	-0.00699178	0.00699178	0.703945	50	-0.0298663	0.0298663	P40506	CAB2	Phosphopantothenate--cysteine ligase CAB2	PPCS_YEAST	9	-0.483461	0.995165	40 min	0 min
40 min / 0 min	P40507	P40507	0.0278436	0.0278436	0.795371	20	-0.0122897	0.0122897	P40507	AIR1	Protein AIR1	AIR1_YEAST	3	1.94872	1.01949	40 min	0 min
40 min / 0 min	P40509	P40509	-0.0903834	0.0903834	0.761955	45	-0.0175336	0.0175336	P40509	SEC28	Coatomer subunit epsilon	COPE_YEAST	7	-6.07269	0.939273	40 min	0 min
40 min / 0 min	P40510	P40510	0.102507	0.102507	0.625571	110	0.0454826	0.0454826	P40510	SER33	D-3-phosphoglycerate dehydrogenase 2	SER33_YEAST	15	7.36373	1.07364	40 min	0 min
40 min / 0 min	P40513	P40513	-0.0310251	0.0310251	0.672993	25	0.0879334	0.0879334	P40513	MAM33	Mitochondrial acidic protein MAM33	MAM33_YEAST	4	-2.12754	0.978725	40 min	0 min
40 min / 0 min	P40515	P40515	-0.0985737	0.0985737	0.499546	40	-0.104348	0.104348	P40515	FIS1	Mitochondria fission 1 protein	FIS1_YEAST	7	-6.60441	0.933956	40 min	0 min
40 min / 0 min	P40516	P40516	-0.101951	0.101951	0.712443	30	0.0699036	0.0699036	P40516	EFM4	Protein-lysine N-methyltransferase EFM4	EFM4_YEAST	5	-6.82278	0.931772	40 min	0 min
40 min / 0 min	P40517	P40517	-0.111891	0.111891	0.727661	40	-0.0691771	0.0691771	P40517	YRB2	Ran-specific GTPase-activating protein 2	YRB2_YEAST	7	-7.46254	0.925375	40 min	0 min
40 min / 0 min	P40518	P40518	-0.0689442	0.0689442	0.651139	60	0.112269	0.112269	P40518	ARC15	Actin-related protein 2/3 complex subunit 5	ARPC5_YEAST	9	-4.66646	0.953335	40 min	0 min
40 min / 0 min	P40525;P87262	P40525;P87262	-0.0779186	0.0779186	0.67048	20	-0.0619684	0.0619684	P40525;P87262	RPL34B;RPL34A	60S ribosomal protein L34-B;60S ribosomal protein L34-A	RL34B_YEAST;RL34A_YEAST	3	-5.25765	0.947424	40 min	0 min
40 min / 0 min	P40527	P40527	-0.0291975	0.0291975	0.65482	30	-0.0727797	0.0727797	P40527	NEO1	Probable phospholipid-transporting ATPase NEO1	ATC7_YEAST	6	-2.00348	0.979965	40 min	0 min
40 min / 0 min	P40528	P40528	-0.0397944	0.0397944	0.751235	15	-0.171127	0.171127	P40528	SYG1	Protein SYG1	SYG1_YEAST	3	-2.72064	0.972794	40 min	0 min
40 min / 0 min	P40529	P40529	-0.0640779	0.0640779	0.682776	40	0.0452734	0.0452734	P40529	AGE2	ADP-ribosylation factor GTPase-activating protein effector protein 2	AGE2_YEAST	8	-4.34435	0.956556	40 min	0 min
40 min / 0 min	P40531	P40531	-0.0958039	0.0958039	0.754841	85	0.0158923	0.0158923	P40531	GVP36	Protein GVP36	GVP36_YEAST	14	-6.42493	0.935751	40 min	0 min
40 min / 0 min	P40533	P40533	-0.00249136	0.00249136	0.647371	35	0.0546047	0.0546047	P40533	TED1	Protein TED1	TED1_YEAST	6	-0.172539	0.998275	40 min	0 min
40 min / 0 min	P40535	P40535	-0.235033	0.235033	0.621746	20	-0.22894	0.22894	P40535	CST6	ATF/CREB activator 2	ACA2_YEAST	4	-15.0334	0.849666	40 min	0 min
40 min / 0 min	P40540	P40540	-0.211217	0.211217	0.0234464	15	-0.275655	0.275655	P40540	EMC5	ER membrane protein complex subunit 5	EMC5_YEAST	3	-13.6192	0.863808	40 min	0 min
40 min / 0 min	P40541	P40541	0.0708619	0.0708619	0.769438	25	-0.0185139	0.0185139	P40541	IRR1	Cohesin subunit SCC3	SCC3_YEAST	5	5.0344	1.05034	40 min	0 min
40 min / 0 min	P40545	P40545	-0.0843878	0.0843878	0.703813	45	0.0516213	0.0516213	P40545	HIS6	1-(5-phosphoribosyl)-5-[(5-phosphoribosylamino)methylideneamino] imidazole-4-carboxamide isomerase	HIS4_YEAST	7	-5.68153	0.943185	40 min	0 min
40 min / 0 min	P40546	P40546	0.517586	0.517586	0.54475	5	0.671451	0.671451	P40546	FAF1	Protein FAF1	FAF1_YEAST	1	43.1558	1.43156	40 min	0 min
40 min / 0 min	P40548	P40548	-0.0198705	0.0198705	0.749502	25	-0.0187279	0.0187279	P40548	SNL1	HSP70 co-chaperone SNL1	SNL1_YEAST	4	-1.36788	0.986321	40 min	0 min
40 min / 0 min	P40549	P40549	0.0821033	0.0821033	0.752825	20	0.0478246	0.0478246	P40549	MNT3	Alpha-1,3-mannosyltransferase MNT3	MNT3_YEAST	4	5.85602	1.05856	40 min	0 min
40 min / 0 min	P40553	P40553	0.0412307	0.0412307	0.651429	40	0.0469119	0.0469119	P40553	DOT5	Peroxiredoxin DOT5	DOT5_YEAST	8	2.89913	1.02899	40 min	0 min
40 min / 0 min	P40554	P40554	-0.195712	0.195712	0.497897	5	-0.199369	0.199369	P40554	URM1	Ubiquitin-related modifier 1	URM1_YEAST	1	-12.6858	0.873142	40 min	0 min
40 min / 0 min	P40555	P40555	-0.0848816	0.0848816	0.529431	20	-0.129307	0.129307	P40555	NAS2	Probable 26S proteasome regulatory subunit p27	PSMD9_YEAST	4	-5.71381	0.942862	40 min	0 min
40 min / 0 min	P40557	P40557	0.00415808	0.00415808	0.572014	70	-0.135971	0.135971	P40557	EPS1	ER-retained PMA1-suppressing protein 1	EPS1_YEAST	14	0.288632	1.00289	40 min	0 min
40 min / 0 min	P40558	P40558	-0.284441	0.284441	0.374179	10	-0.325983	0.325983	P40558	CFD1	Cytosolic Fe-S cluster assembly factor CFD1	CFD1_YEAST	2	-17.8941	0.821059	40 min	0 min
40 min / 0 min	P40559	P40559	0.156976	0.156976	0.647806	5	0.151846	0.151846	P40559	INP51	Phosphatidylinositol 4,5-bisphosphate 5-phosphatase INP51	INP51_YEAST	1	11.4948	1.11495	40 min	0 min
40 min / 0 min	P40561	P40561	-0.0849295	0.0849295	0.62327	30	-0.0993462	0.0993462	P40561	SGN1	RNA-binding protein SGN1	SGN1_YEAST	6	-5.71694	0.942831	40 min	0 min
40 min / 0 min	P40563	P40563	0.049282	0.049282	0.779767	40	-0.0156055	0.0156055	P40563	AIM21	Altered inheritance of mitochondria protein 21	AIM21_YEAST	7	3.47498	1.03475	40 min	0 min
40 min / 0 min	P40564	P40564	0.0225127	0.0225127	0.778331	45	-0.0672254	0.0672254	P40564	DJP1	DnaJ-like protein 1	DJP1_YEAST	8	1.5727	1.01573	40 min	0 min
40 min / 0 min	P40565	P40565	-1.5258	1.5258	0.562417	10	-0.718427	0.718427	P40565	IST3	U2 snRNP component IST3	IST3_YEAST	2	-65.2713	0.347287	40 min	0 min
40 min / 0 min	P40566	P40566	-0.259504	0.259504	0.547105	5	-0.251939	0.251939	P40566	YIR007W	Uncharacterized glycosyl hydrolase YIR007W	YIS7_YEAST	1	-16.4625	0.835375	40 min	0 min
40 min / 0 min	P40571	P40571	0.132087	0.132087	0.614694	10	0.209516	0.209516	P40571	RPR2	Ribonuclease P protein subunit RPR2	RPR2_YEAST	2	9.5878	1.09588	40 min	0 min
40 min / 0 min	P40579	P40579	0.00500849	0.00500849	0.787576	15	-0.00790334	0.00790334	P40579	YIR035C	Uncharacterized oxidoreductase YIR035C	YIV5_YEAST	3	0.347765	1.00348	40 min	0 min
40 min / 0 min	P40580	P40580	-0.0782079	0.0782079	0.625827	70	0.121332	0.121332	P40580	IRC24	Benzil reductase ((S)-benzoin forming) IRC24	BZRD_YEAST	11	-5.27664	0.947234	40 min	0 min
40 min / 0 min	P40581	P40581	0.0910995	0.0910995	0.741221	25	-0.0162433	0.0162433	P40581	HYR1	Peroxiredoxin HYR1	GPX3_YEAST	5	6.51816	1.06518	40 min	0 min
40 min / 0 min	P40582	P40582	-0.031826	0.031826	0.569247	30	0.3403	0.3403	P40582	GTT1	Glutathione S-transferase 1	GST1_YEAST	5	-2.18185	0.978181	40 min	0 min
40 min / 0 min	P40693	P40693	0.0536647	0.0536647	0.625724	35	0.0566467	0.0566467	P40693	RLP7	Ribosome biogenesis protein RLP7	RLP7_YEAST	7	3.7898	1.0379	40 min	0 min
40 min / 0 min	P40825	P40825	0.118779	0.118779	0.324469	345	0.120827	0.120827	P40825	ALA1	Alanine--tRNA ligase, mitochondrial	SYA_YEAST	52	8.58157	1.08582	40 min	0 min
40 min / 0 min	P40850	P40850	-0.13582	0.13582	0.614694	65	-0.174778	0.174778	P40850	MKT1	Protein MKT1	MKT1_YEAST	11	-8.98478	0.910152	40 min	0 min
40 min / 0 min	P40851	P40851	0.24482	0.24482	0.713291	5	0.238528	0.238528	P40851	AXL1	Putative protease AXL1	AXL1_YEAST	1	18.4945	1.18494	40 min	0 min
40 min / 0 min	P40856	P40856	-0.0884212	0.0884212	0.586412	25	-0.110918	0.110918	P40856	SAP185	SIT4-associating protein SAP185	SA185_YEAST	5	-5.94485	0.940551	40 min	0 min
40 min / 0 min	P40858	P40858	0.0373726	0.0373726	0.72361	5	0.0529391	0.0529391	P40858	MRPL49	54S ribosomal protein L49, mitochondrial	RN49_YEAST	2	2.62431	1.02624	40 min	0 min
40 min / 0 min	P40893	P40893	0.0655375	0.0655375	0.728707	55	0.0235172	0.0235172	P40893	REE1	Regulation of enolase protein 1	REE1_YEAST	8	4.64748	1.04647	40 min	0 min
40 min / 0 min	P40897	P40897	-0.385102	0.385102	0.620659	20	-0.17523	0.17523	P40897	OPT1	Oligopeptide transporter 1	OPT1_YEAST	4	-23.4275	0.765725	40 min	0 min
40 min / 0 min	P40956	P40956	-0.340836	0.340836	0.367907	35	-0.272076	0.272076	P40956	GTS1	Protein GTS1	GTS1_YEAST	6	-21.0416	0.789584	40 min	0 min
40 min / 0 min	P40957	P40957	-0.00366531	0.00366531	0.577976	55	-0.298946	0.298946	P40957	MAD1	Spindle assembly checkpoint component MAD1	MAD1_YEAST	11	-0.253737	0.997463	40 min	0 min
40 min / 0 min	P40958	P40958	-0.0439662	0.0439662	0.54291	20	-0.150225	0.150225	P40958	MAD2	Mitotic spindle checkpoint component MAD2	MAD2_YEAST	4	-3.00154	0.969985	40 min	0 min
40 min / 0 min	P40959	P40959	0.104807	0.104807	0.630923	45	0.120964	0.120964	P40959	MVP1	Sorting nexin MVP1	MVP1_YEAST	9	7.53507	1.07535	40 min	0 min
40 min / 0 min	P40961	P40961	0.0583244	0.0583244	0.707706	45	0.0367727	0.0367727	P40961	PHB1	Prohibitin-1	PHB1_YEAST	8	4.12557	1.04126	40 min	0 min
40 min / 0 min	P40962	P40962	0.22473	0.22473	0.708117	5	0.294534	0.294534	P40962	RTS2	Zinc finger protein RTS2	RTS2_YEAST	1	16.8559	1.16856	40 min	0 min
40 min / 0 min	P40970	P40970	-0.0130547	0.0130547	0.716689	90	0.0995449	0.0995449	P40970	LCB2	Serine palmitoyltransferase 2	LCB2_YEAST	14	-0.900801	0.990992	40 min	0 min
40 min / 0 min	P40986	P40986	0.0272974	0.0272974	0.509395	35	-0.317598	0.317598	P40986	CDC1	Cell division control protein 1	CDC1_YEAST	6	1.91013	1.0191	40 min	0 min
40 min / 0 min	P40987	P40987	-0.0204475	0.0204475	0.672437	10	-0.140184	0.140184	P40987	CIN1	Chromosome instability protein 1	CIN1_YEAST	2	-1.40732	0.985927	40 min	0 min
40 min / 0 min	P40991	P40991	0.0483428	0.0483428	0.517418	115	0.24889	0.24889	P40991	NOP2	25S rRNA (cytosine(2870)-C(5))-methyltransferase	NOP2_YEAST	19	3.40764	1.03408	40 min	0 min
40 min / 0 min	P40994	P40994	-0.29702	0.29702	0.280849	10	-0.38114	0.38114	P40994	ARF3	ADP-ribosylation factor 3	ARF3_YEAST	2	-18.6068	0.813932	40 min	0 min
40 min / 0 min	P41056	P41056	-0.141033	0.141033	0.601351	10	-0.0974374	0.0974374	P41056	RPL33B	60S ribosomal protein L33-B	RL33B_YEAST	2	-9.31302	0.90687	40 min	0 min
40 min / 0 min	P41057	P41057	0.109405	0.109405	0.51679	50	0.178183	0.178183	P41057	RPS29A	40S ribosomal protein S29-A	RS29A_YEAST	8	7.87832	1.07878	40 min	0 min
40 min / 0 min	P41058	P41058	0.0550389	0.0550389	0.529083	30	0.133005	0.133005	P41058	RPS29B	40S ribosomal protein S29-B	RS29B_YEAST	5	3.88871	1.03889	40 min	0 min
40 min / 0 min	P41277	P41277	-0.0650046	0.0650046	0.54475	170	0.0737113	0.0737113	P41277	GPP1	Glycerol-1-phosphate phosphohydrolase 1	GPP1_YEAST	23	-4.40577	0.955942	40 min	0 min
40 min / 0 min	P41318	P41318	0.088341	0.088341	0.709281	10	0.0660375	0.0660375	P41318	LST8	Target of rapamycin complex subunit LST8	LST8_YEAST	2	6.31469	1.06315	40 min	0 min
40 min / 0 min	P41338	P41338	0.00867107	0.00867107	0.576649	130	-0.158769	0.158769	P41338	ERG10	Acetyl-CoA acetyltransferase	THIL_YEAST	18	0.602842	1.00603	40 min	0 min
40 min / 0 min	P41543	P41543	0.103088	0.103088	0.717266	45	-0.0826821	0.0826821	P41543	OST1	Dolichyl-diphosphooligosaccharide--protein glycosyltransferase subunit 1	OST1_YEAST	9	7.40701	1.07407	40 min	0 min
40 min / 0 min	P41696	P41696	-0.144926	0.144926	0.780214	10	-0.0343592	0.0343592	P41696	AZF1	Asparagine-rich zinc finger protein AZF1	AZF1_YEAST	2	-9.5574	0.904426	40 min	0 min
40 min / 0 min	P41697	P41697	0.0912456	0.0912456	0.742096	25	0.0779293	0.0779293	P41697	BUD6	Bud site selection protein 6	BUD6_YEAST	5	6.52895	1.06529	40 min	0 min
40 min / 0 min	P41733	P41733	0.0792707	0.0792707	0.70069	5	0.0782472	0.0782472	P41733	GAB1	GPI transamidase component GAB1	CDC91_YEAST	1	5.64839	1.05648	40 min	0 min
40 min / 0 min	P41734	P41734	-0.153386	0.153386	0.73197	35	-0.072336	0.072336	P41734	IAH1	Isoamyl acetate-hydrolyzing esterase	IAH1_YEAST	7	-10.0862	0.899138	40 min	0 min
40 min / 0 min	P41735	P41735	-0.276651	0.276651	0.638437	10	0.281712	0.281712	P41735	CAT5	5-demethoxyubiquinone hydroxylase, mitochondrial	COQ7_YEAST	2	-17.4495	0.825505	40 min	0 min
40 min / 0 min	P41800	P41800	0.029548	0.029548	0.747769	15	-0.048691	0.048691	P41800	MMM1	Maintenance of mitochondrial morphology protein 1	MMM1_YEAST	3	2.06923	1.02069	40 min	0 min
40 min / 0 min	P41805	P41805	0.0581958	0.0581958	0.430476	170	0.282324	0.282324	P41805	RPL10	60S ribosomal protein L10	RL10_YEAST	23	4.11629	1.04116	40 min	0 min
40 min / 0 min	P41807	P41807	-0.00727901	0.00727901	0.769851	150	-0.0123416	0.0123416	P41807	VMA13	V-type proton ATPase subunit H	VATH_YEAST	23	-0.503272	0.994967	40 min	0 min
40 min / 0 min	P41810	P41810	0.0353678	0.0353678	0.707706	165	-0.0299357	0.0299357	P41810	SEC26	Coatomer subunit beta	COPB_YEAST	27	2.48181	1.02482	40 min	0 min
40 min / 0 min	P41811	P41811	0.0334964	0.0334964	0.784667	135	-0.00434702	0.00434702	P41811	SEC27	Coatomer subunit beta'	COPB2_YEAST	22	2.34896	1.02349	40 min	0 min
40 min / 0 min	P41812	P41812	0.276461	0.276461	0.702524	10	-0.266508	0.266508	P41812	POP1	Ribonucleases P/MRP protein subunit POP1	POP1_YEAST	2	21.122	1.21122	40 min	0 min
40 min / 0 min	P41813	P41813	-0.0822034	0.0822034	0.741996	20	0.0953995	0.0953995	P41813	FKH2	Fork head protein homolog 2	FKH2_YEAST	4	-5.53861	0.944614	40 min	0 min
40 min / 0 min	P41814	P41814	-0.0734784	0.0734784	0.555823	20	-0.114617	0.114617	P41814	GCD10	tRNA (adenine(58)-N(1))-methyltransferase non-catalytic subunit TRM6	TRM6_YEAST	3	-4.96561	0.950344	40 min	0 min
40 min / 0 min	P41815	P41815	0.112355	0.112355	0.520493	25	0.0774331	0.0774331	P41815	BAP3	Valine amino-acid permease	BAP3_YEAST	5	8.09913	1.08099	40 min	0 min
40 min / 0 min	P41818	P41818	-0.0274956	0.0274956	0.631449	30	-0.138269	0.138269	P41818	GLC8	Protein GLC8	GLC8_YEAST	5	-1.8878	0.981122	40 min	0 min
40 min / 0 min	P41819	P41819	-0.0579256	0.0579256	0.781039	65	-0.00956946	0.00956946	P41819	DIM1	Dimethyladenosine transferase	DIM1_YEAST	13	-3.93556	0.960644	40 min	0 min
40 min / 0 min	P41821	P41821	0.140432	0.140432	0.693193	5	0.226359	0.226359	P41821	MID1	Stretch-activated cation channel MID1	MID1_YEAST	1	10.2235	1.10224	40 min	0 min
40 min / 0 min	P41832	P41832	-0.208302	0.208302	0.780227	20	0.0461201	0.0461201	P41832	BNI1	Protein BNI1	BNI1_YEAST	5	-13.4445	0.865555	40 min	0 min
40 min / 0 min	P41834	P41834	0.224571	0.224571	0.611896	15	-0.64702	0.64702	P41834	UFE1	Syntaxin UFE1	UFE1_YEAST	3	16.843	1.16843	40 min	0 min
40 min / 0 min	P41895	P41895	0.180845	0.180845	0.60084	70	0.154281	0.154281	P41895	TFG1	Transcription initiation factor IIF subunit alpha	T2FA_YEAST	11	13.3548	1.13355	40 min	0 min
40 min / 0 min	P41896	P41896	0.080459	0.080459	0.632159	35	-0.160092	0.160092	P41896	TFG2	Transcription initiation factor IIF subunit beta	T2FB_YEAST	7	5.73544	1.05735	40 min	0 min
40 min / 0 min	P41903	P41903	0.00682552	0.00682552	0.61376	10	0.140371	0.140371	P41903	TES1	Peroxisomal acyl-coenzyme A thioester hydrolase 1	PTE1_YEAST	2	0.47423	1.00474	40 min	0 min
40 min / 0 min	P41910	P41910	-0.0216416	0.0216416	0.765581	20	-0.0201926	0.0201926	P41910	MAF1	Repressor of RNA polymerase III transcription MAF1	MAF1_YEAST	4	-1.48889	0.985111	40 min	0 min
40 min / 0 min	P41911	P41911	-0.0778343	0.0778343	0.572283	100	-0.0730784	0.0730784	P41911	GPD2	Glycerol-3-phosphate dehydrogenase [NAD(+)] 2, mitochondrial	GPD2_YEAST	14	-5.25211	0.947479	40 min	0 min
40 min / 0 min	P41920	P41920	-0.00782342	0.00782342	0.5049	50	0.192646	0.192646	P41920	YRB1	Ran-specific GTPase-activating protein 1	YRB1_YEAST	6	-0.54081	0.994592	40 min	0 min
40 min / 0 min	P41921	P41921	0.0428108	0.0428108	0.692505	110	0.0599976	0.0599976	P41921	GLR1	Glutathione reductase	GSHR_YEAST	16	3.01189	1.03012	40 min	0 min
40 min / 0 min	P41930	P41930	-0.284952	0.284952	0.325531	20	-0.205209	0.205209	P41930	SSU1	Sulfite efflux pump SSU1	SSU1_YEAST	4	-17.9231	0.820769	40 min	0 min
40 min / 0 min	P41940	P41940	0.112912	0.112912	0.298286	100	0.156283	0.156283	P41940	PSA1	Mannose-1-phosphate guanyltransferase	MPG1_YEAST	16	8.14087	1.08141	40 min	0 min
40 min / 0 min	P42073	P42073	0.262156	0.262156	0.374179	15	0.357429	0.357429	P42073	REF2	RNA end formation protein 2	REF2_YEAST	3	19.9269	1.19927	40 min	0 min
40 min / 0 min	P42826	P42826	-0.109535	0.109535	0.572764	45	-0.0884091	0.0884091	P42826	XKS1	Xylulose kinase	XKS1_YEAST	9	-7.31135	0.926887	40 min	0 min
40 min / 0 min	P42835	P42835	-0.0641785	0.0641785	0.66089	5	-0.0767234	0.0767234	P42835	EGT2	Protein EGT2	EGT2_YEAST	2	-4.35102	0.95649	40 min	0 min
40 min / 0 min	P42838	P42838	-0.137834	0.137834	0.59568	40	-0.157194	0.157194	P42838	LEM3	Alkylphosphocholine resistance protein LEM3	LEM3_YEAST	8	-9.11174	0.908883	40 min	0 min
40 min / 0 min	P42839	P42839	0.0450915	0.0450915	0.617492	10	0.212824	0.212824	P42839	VNX1	Low affinity vacuolar monovalent cation/H(+) antiporter	VNX1_YEAST	2	3.17486	1.03175	40 min	0 min
40 min / 0 min	P42840	P42840	0.0391225	0.0391225	0.779024	5	0.0393832	0.0393832	P42840	YNL320W	Uncharacterized membrane protein YNL320W	YN60_YEAST	2	2.74887	1.02749	40 min	0 min
40 min / 0 min	P42841	P42841	-0.00331416	0.00331416	0.743807	15	-0.0390891	0.0390891	P42841	PFS2	Polyadenylation factor subunit 2	PFS2_YEAST	3	-0.229456	0.997705	40 min	0 min
40 min / 0 min	P42842	P42842	0.0072777	0.0072777	0.494374	85	0.140693	0.140693	P42842	EMW1	Essential for maintenance of the cell wall protein 1	EMW1_YEAST	17	0.505726	1.00506	40 min	0 min
40 min / 0 min	P42843	P42843	0.0184815	0.0184815	0.676426	25	0.0701911	0.0701911	P42843	SKP2	F-box protein SKP2	SKP2_YEAST	5	1.28928	1.01289	40 min	0 min
40 min / 0 min	P42844	P42844	-0.0963597	0.0963597	0.667409	5	-0.0847129	0.0847129	P42844	ZIM17	Mitochondrial protein import protein ZIM17	ZIM17_YEAST	1	-6.46098	0.93539	40 min	0 min
40 min / 0 min	P42845	P42845	-0.286346	0.286346	0.591435	5	-0.270669	0.270669	P42845	STB1	Protein STB1	STB1_YEAST	1	-18.0024	0.819976	40 min	0 min
40 min / 0 min	P42846	P42846	0.0976161	0.0976161	0.430476	105	0.145077	0.145077	P42846	KRI1	Protein KRI1	KRI1_YEAST	17	7.0004	1.07	40 min	0 min
40 min / 0 min	P42847	P42847	0.0809973	0.0809973	0.61822	15	0.0940895	0.0940895	P42847	MRPS18	37S ribosomal protein S18, mitochondrial	RT18_YEAST	3	5.7749	1.05775	40 min	0 min
40 min / 0 min	P42900	P42900	0.236476	0.236476	0.589973	10	0.330931	0.330931	P42900	SLS1	Sigma-like sequence protein 1, mitochondrial	SLS1_YEAST	2	17.8111	1.17811	40 min	0 min
40 min / 0 min	P42934	P42934	-0.116361	0.116361	0.483784	15	-0.167507	0.167507	P42934	PMT6	Dolichyl-phosphate-mannose--protein mannosyltransferase 6	PMT6_YEAST	3	-7.74883	0.922512	40 min	0 min
40 min / 0 min	P42935	P42935	-0.0712608	0.0712608	0.496714	85	-0.0947696	0.0947696	P42935	ELP2	Elongator complex protein 2	ELP2_YEAST	15	-4.81942	0.951806	40 min	0 min
40 min / 0 min	P42937	P42937	-0.0062673	0.0062673	0.574176	25	-0.0883763	0.0883763	P42937	YCH1	CDC25-like phosphatase YCH1	YCH1_YEAST	4	-0.433474	0.995665	40 min	0 min
40 min / 0 min	P42938	P42938	-0.0302632	0.0302632	0.750911	25	-0.027844	0.027844	P42938	TDA10	Probable ATP-dependent kinase TDA10	TDA10_YEAST	5	-2.07584	0.979242	40 min	0 min
40 min / 0 min	P42940	P42940	-0.116582	0.116582	0.784667	75	0.0112326	0.0112326	P42940	CIR1	Probable electron transfer flavoprotein subunit beta	ETFB_YEAST	14	-7.76298	0.92237	40 min	0 min
40 min / 0 min	P42941	P42941	-0.0828607	0.0828607	0.79239	55	0.00514814	0.00514814	P42941	SER2	Phosphoserine phosphatase	SERB_YEAST	9	-5.58164	0.944184	40 min	0 min
40 min / 0 min	P42942	P42942	0.0809291	0.0809291	0.732333	50	0.0325929	0.0325929	P42942	YGR210C	Uncharacterized GTP-binding protein YGR210C	YG4I_YEAST	10	5.7699	1.0577	40 min	0 min
40 min / 0 min	P42943	P42943	0.0408453	0.0408453	0.341429	145	0.132646	0.132646	P42943	CCT7	T-complex protein 1 subunit eta	TCPH_YEAST	23	2.87164	1.02872	40 min	0 min
40 min / 0 min	P42945	P42945	0.164192	0.164192	0.602791	165	0.0856525	0.0856525	P42945	UTP10	U3 small nucleolar RNA-associated protein 10	UTP10_YEAST	31	12.0538	1.12054	40 min	0 min
40 min / 0 min	P42949	P42949	-0.0670355	0.0670355	0.776069	40	-0.00812305	0.00812305	P42949	PAM16	Mitochondrial import inner membrane translocase subunit TIM16	TIM16_YEAST	7	-4.54025	0.954598	40 min	0 min
40 min / 0 min	P43123	P43123	-0.0221699	0.0221699	0.268562	140	-0.128707	0.128707	P43123	QRI1	UDP-N-acetylglucosamine pyrophosphorylase	UAP1_YEAST	25	-1.52495	0.98475	40 min	0 min
40 min / 0 min	P43132	P43132	-0.0720772	0.0720772	0.420073	30	-0.461505	0.461505	P43132	BRE2	COMPASS component BRE2	BRE2_YEAST	6	-4.87326	0.951267	40 min	0 min
40 min / 0 min	P43321	P43321	0.0999439	0.0999439	0.684524	20	0.161491	0.161491	P43321	SMD3	Small nuclear ribonucleoprotein Sm D3	SMD3_YEAST	3	7.17318	1.07173	40 min	0 min
40 min / 0 min	P43535	P43535	0.0281041	0.0281041	0.699549	160	0.0305863	0.0305863	P43535	GCN20	Protein GCN20	GCN20_YEAST	26	1.96712	1.01967	40 min	0 min
40 min / 0 min	P43554	P43554	-0.0593578	0.0593578	0.618603	10	-0.0701041	0.0701041	P43554	SWP82	SWI/SNF global transcription activator complex subunit SWP82	SWP82_YEAST	2	-4.03088	0.959691	40 min	0 min
40 min / 0 min	P43555	P43555	0.0375236	0.0375236	0.592024	60	0.181225	0.181225	P43555	EMP47	Protein EMP47	EMP47_YEAST	10	2.63506	1.02635	40 min	0 min
40 min / 0 min	P43556	P43556	-0.0448732	0.0448732	0.668042	20	0.0645238	0.0645238	P43556	RGD2	Rho-GTPase-activating protein RGD2	RGD2_YEAST	4	-3.0625	0.969375	40 min	0 min
40 min / 0 min	P43558	P43558	-0.040943	0.040943	0.774892	5	-0.0605987	0.0605987	P43558	OTU1	Ubiquitin thioesterase OTU1	OTU1_YEAST	1	-2.79806	0.972019	40 min	0 min
40 min / 0 min	P43560	P43560	0.238764	0.238764	0.550572	10	0.280652	0.280652	P43560	YFL042C	Uncharacterized protein YFL042C	YFE2_YEAST	2	17.9981	1.17998	40 min	0 min
40 min / 0 min	P43561	P43561	0.121021	0.121021	0.549717	45	0.12842	0.12842	P43561	FET5	Iron transport multicopper oxidase FET5	FET5_YEAST	9	8.75039	1.0875	40 min	0 min
40 min / 0 min	P43563	P43563	-0.224537	0.224537	0.577976	10	-0.586018	0.586018	P43563	MOB2	CBK1 kinase activator protein MOB2	MOB2_YEAST	2	-14.413	0.85587	40 min	0 min
40 min / 0 min	P43565	P43565	0.476752	0.476752	0.56266	5	0.506394	0.506394	P43565	RIM15	Serine/threonine-protein kinase RIM15	RIM15_YEAST	1	39.1607	1.39161	40 min	0 min
40 min / 0 min	P43568	P43568	-0.0970632	0.0970632	0.690637	15	-0.184267	0.184267	P43568	CAK1	Serine/threonine-protein kinase CAK1	CAK1_YEAST	3	-6.50658	0.934934	40 min	0 min
40 min / 0 min	P43569	P43569	-0.0653603	0.0653603	0.545636	50	-0.110682	0.110682	P43569	CAF16	CCR4-associated factor 16	CAF16_YEAST	9	-4.42934	0.955707	40 min	0 min
40 min / 0 min	P43570	P43570	0.011301	0.011301	0.785901	5	0.0131794	0.0131794	P43570	GYP8	GTPase-activating protein GYP8	GYP8_YEAST	1	0.786405	1.00786	40 min	0 min
40 min / 0 min	P43573	P43573	-0.0732839	0.0732839	0.660971	35	-0.0594448	0.0594448	P43573	BUD27	Bud site selection protein 27	BUD27_YEAST	7	-4.95279	0.950472	40 min	0 min
40 min / 0 min	P43574	P43574	0.0860495	0.0860495	0.678035	15	0.0684276	0.0684276	P43574	GAT1	Transcriptional regulatory protein GAT1	GAT1_YEAST	3	6.14597	1.06146	40 min	0 min
40 min / 0 min	P43577	P43577	-0.158041	0.158041	0.562417	35	-0.455818	0.455818	P43577	GNA1	Glucosamine 6-phosphate N-acetyltransferase	GNA1_YEAST	4	-10.3759	0.896241	40 min	0 min
40 min / 0 min	P43579	P43579	-0.177507	0.177507	0.765581	20	0.0599737	0.0599737	P43579	IES1	Ino eighty subunit 1	IES1_YEAST	4	-11.577	0.88423	40 min	0 min
40 min / 0 min	P43582	P43582	-0.155028	0.155028	0.550573	20	-0.522046	0.522046	P43582	WWM1	WW domain-containing protein WWM1	WWM1_YEAST	3	-10.1885	0.898115	40 min	0 min
40 min / 0 min	P43583	P43583	0.0141361	0.0141361	0.690001	100	0.0697212	0.0697212	P43583	BLM10	Proteasome activator BLM10	BLM10_YEAST	21	0.984655	1.00985	40 min	0 min
40 min / 0 min	P43585	P43585	-0.0344	0.0344	0.677033	145	-0.0328112	0.0328112	P43585	VTC2	Vacuolar transporter chaperone 2	VTC2_YEAST	27	-2.35622	0.976438	40 min	0 min
40 min / 0 min	P43586	P43586	0.0563114	0.0563114	0.581374	30	0.0864929	0.0864929	P43586	LOC1	60S ribosomal subunit assembly/export protein LOC1	LOC1_YEAST	5	3.98039	1.0398	40 min	0 min
40 min / 0 min	P43587	P43587	-0.077374	0.077374	0.600904	10	-0.140086	0.140086	P43587	YPI1	Type 1 phosphatases regulator YPI1	YPI1_YEAST	2	-5.22188	0.947781	40 min	0 min
40 min / 0 min	P43588	P43588	0.0847399	0.0847399	0.599403	70	0.0648969	0.0648969	P43588	RPN11	Ubiquitin carboxyl-terminal hydrolase RPN11	RPN11_YEAST	11	6.04965	1.0605	40 min	0 min
40 min / 0 min	P43589	P43589	-0.161346	0.161346	0.672658	20	-0.160113	0.160113	P43589	SAD1	Pre-mRNA-splicing factor SAD1	SAD1_YEAST	3	-10.581	0.89419	40 min	0 min
40 min / 0 min	P43590	P43590	-0.0578358	0.0578358	0.7734	75	-0.0139321	0.0139321	P43590	YFR006W	Uncharacterized peptidase YFR006W	YFH6_YEAST	14	-3.92958	0.960704	40 min	0 min
40 min / 0 min	P43591	P43591	-0.0516096	0.0516096	0.54924	40	0.485253	0.485253	P43591	YFH7	ATP-dependent kinase YFH7	YFH7_YEAST	8	-3.51407	0.964859	40 min	0 min
40 min / 0 min	P43593	P43593	0.0436088	0.0436088	0.633006	135	-0.148011	0.148011	P43593	UBP6	Ubiquitin carboxyl-terminal hydrolase 6	UBP6_YEAST	20	3.06888	1.03069	40 min	0 min
40 min / 0 min	P43594	P43594	-0.0315246	0.0315246	0.765421	15	-0.0153443	0.0153443	P43594	MIC19	MICOS complex subunit MIC19	MIC19_YEAST	3	-2.16142	0.978386	40 min	0 min
40 min / 0 min	P43596	P43596	-0.0648288	0.0648288	0.637521	30	0.202194	0.202194	P43596	IOC3	ISWI one complex protein 3	IOC3_YEAST	6	-4.39413	0.956059	40 min	0 min
40 min / 0 min	P43597	P43597	-0.00847464	0.00847464	0.657957	60	0.178499	0.178499	P43597	YFR016C	Uncharacterized protein YFR016C	YFI6_YEAST	12	-0.585696	0.994143	40 min	0 min
40 min / 0 min	P43599	P43599	0.00670323	0.00670323	0.783413	10	0.0066224	0.0066224	P43599	YFR018C	Uncharacterized protein YFR018C	YFI8_YEAST	2	0.465713	1.00466	40 min	0 min
40 min / 0 min	P43601	P43601	1.57829	1.57829	0.791098	10	0.0402958	0.0402958	P43601	ATG18	Autophagy-related protein 18	ATG18_YEAST	2	198.615	2.98615	40 min	0 min
40 min / 0 min	P43603	P43603	0.0613252	0.0613252	0.574158	70	-0.297846	0.297846	P43603	LSB3	LAS seventeen-binding protein 3	LSB3_YEAST	13	4.34237	1.04342	40 min	0 min
40 min / 0 min	P43609	P43609	-0.00352346	0.00352346	0.771456	100	-0.00982483	0.00982483	P43609	RSC8	Chromatin structure-remodeling complex protein RSC8	RSC8_YEAST	17	-0.24393	0.997561	40 min	0 min
40 min / 0 min	P43610	P43610	0.33406	0.33406	0.605657	5	0.324553	0.324553	P43610	IRC5	Uncharacterized ATP-dependent helicase IRC5	IRC5_YEAST	1	26.0556	1.26056	40 min	0 min
40 min / 0 min	P43611	P43611	0.0493008	0.0493008	0.752212	30	-0.0384324	0.0384324	P43611	OSW7	Outer spore wall protein 7	OSW7_YEAST	6	3.47633	1.03476	40 min	0 min
40 min / 0 min	P43612	P43612	0.0933151	0.0933151	0.497897	30	0.0943103	0.0943103	P43612	SAP155	SIT4-associating protein SAP155	SA155_YEAST	6	6.68187	1.06682	40 min	0 min
40 min / 0 min	P43613	P43613	-0.101906	0.101906	0.203481	30	-0.220368	0.220368	P43613	ERJ5	ER-localized J domain-containing protein 5	ERJ5_YEAST	5	-6.8199	0.931801	40 min	0 min
40 min / 0 min	P43615	P43615	-0.169376	0.169376	0.551738	5	-0.162703	0.162703	P43615	IRC6	Increased recombination centers protein 6	IRC6_YEAST	1	-11.0773	0.889227	40 min	0 min
40 min / 0 min	P43616	P43616	0.0237081	0.0237081	0.745506	155	-0.0168628	0.0168628	P43616	DUG1	Cys-Gly metallodipeptidase DUG1	DUG1_YEAST	22	1.6569	1.01657	40 min	0 min
40 min / 0 min	P43619	P43619	0.0136431	0.0136431	0.573049	45	-0.156752	0.156752	P43619	BNA6	Nicotinate-nucleotide pyrophosphorylase [carboxylating]	NADC_YEAST	6	0.950156	1.0095	40 min	0 min
40 min / 0 min	P43620	P43620	0.0203744	0.0203744	0.624056	25	0.141335	0.141335	P43620	RMD8	Sporulation protein RMD8	RMD8_YEAST	5	1.42227	1.01422	40 min	0 min
40 min / 0 min	P43621	P43621	0.118609	0.118609	0.649618	60	0.16543	0.16543	P43621	RET2	Coatomer subunit delta	COPD_YEAST	10	8.56876	1.08569	40 min	0 min
40 min / 0 min	P43636	P43636	-0.127771	0.127771	0.641974	35	-0.0746959	0.0746959	P43636	ALG2	Alpha-1,3/1,6-mannosyltransferase ALG2	ALG2_YEAST	7	-8.47553	0.915245	40 min	0 min
40 min / 0 min	P43638	P43638	0.150254	0.150254	0.560707	60	0.181332	0.181332	P43638	MHP1	MAP-homologous protein 1	MHP1_YEAST	12	10.9765	1.10976	40 min	0 min
40 min / 0 min	P43639	P43639	-0.173259	0.173259	0.607382	25	-0.336935	0.336935	P43639	CKB1	Casein kinase II subunit beta	CSK2B_YEAST	5	-11.3163	0.886837	40 min	0 min
40 min / 0 min	P43682	P43682	-0.209733	0.209733	0.551309	5	-0.21953	0.21953	P43682	SFT1	Protein transport protein SFT1	SFT1_YEAST	1	-13.5303	0.864697	40 min	0 min
40 min / 0 min	P45818	P45818	-0.118632	0.118632	0.800438	25	-0.00162965	0.00162965	P45818	ROK1	ATP-dependent RNA helicase ROK1	ROK1_YEAST	5	-7.89392	0.921061	40 min	0 min
40 min / 0 min	P45976	P45976	-0.166305	0.166305	0.551236	15	-0.181512	0.181512	P45976	FIP1	Pre-mRNA polyadenylation factor FIP1	FIP1_YEAST	3	-10.8878	0.891122	40 min	0 min
40 min / 0 min	P45978	P45978	-0.0913171	0.0913171	0.448551	35	-0.207845	0.207845	P45978	SCD6	Protein SCD6	SCD6_YEAST	6	-6.13346	0.938665	40 min	0 min
40 min / 0 min	P46151	P46151	-0.414211	0.414211	0.188492	60	-0.387035	0.387035	P46151	MET12	Methylenetetrahydrofolate reductase 1	MTHR1_YEAST	12	-24.957	0.75043	40 min	0 min
40 min / 0 min	P46367	P46367	0.0580242	0.0580242	0.599133	150	0.050115	0.050115	P46367	ALD4	Potassium-activated aldehyde dehydrogenase, mitochondrial	ALDH4_YEAST	24	4.1039	1.04104	40 min	0 min
40 min / 0 min	P46654	P46654	0.154353	0.154353	0.616811	90	0.235311	0.235311	P46654	RPS0B	40S ribosomal protein S0-B	RSSA2_YEAST	10	11.2923	1.11292	40 min	0 min
40 min / 0 min	P46655	P46655	0.128048	0.128048	0.590289	305	0.0838493	0.0838493	P46655	GUS1	Glutamate--tRNA ligase, cytoplasmic	SYEC_YEAST	46	9.28141	1.09281	40 min	0 min
[truncated: 1,514 more rows]

## Sheet: Significant q-value 40 minutes
Gene	AVG Log2 Ratio	Qvalue	neg log10qvalue
STE2	-0.59288	6.32415e-05	4.199
PGK1	0.120856	2.5184e-05	4.59887
CIT1	0.150174	0.000126353	3.89841
ENO1	0.124795	0.0261745	1.58212
ENO2	0.169412	0.0380158	1.42004
MET6	0.223313	6.32415e-05	4.199
SCP160	0.150365	0.0282669	1.54872
HIP1	-0.969293	0.0174245	1.75884
FAS1	0.140774	0.0196404	1.70685
GDH1	0.169392	0.00317051	2.49887
RPB2	0.175214	0.0159805	1.79641
YEF3	0.136585	0.0287663	1.54112
GAP1	0.312821	0.045801	1.33912
TKL1	0.240357	0.0211109	1.67549
CPR4	-0.69244	0.00899652	2.04593
ITR1	0.327943	0.0111605	1.95232
EFT1	0.139008	0.0174245	1.75884
GUA1	0.146538	0.00317051	2.49887
CEM1	-0.227957	0.00590195	2.229
EMC5	-0.211217	0.0234464	1.62992
PDR16	0.107256	0.0380158	1.42004
KRE33	0.26214	0.00317051	2.49887
TRS31	-0.15051	0.0282669	1.54872
TY1B-ML2;TY1B-ER1	0.0623886	6.75242e-20	19.1705
CLU1	0.054172	0.0117287	1.93075
TY1A-DR1;TY1A-GR2	0.567645	0.00728074	2.13782
ECM16	0.374324	0.00317051	2.49887
ARG7	-0.126297	0.00317051	2.49887
DUS3	-0.099664	0.0433468	1.36304
ARO10	-0.232251	0.020472	1.68884
SLF1	0.32683	0.00273957	2.56232
CEX1	0.0841243	0.0294015	1.53163
GLT1	0.0149971	0.0120238	1.91996
RRP12	0.230365	0.0211109	1.67549
ODC2	-0.147057	0.045801	1.33912
HRP1	0.575032	0.0165831	1.78033
