# Supplementary material for: Genetic and pharmacological evidence for kinetic competition between alternative poly(A) sites in yeast
Source: eLife. 2021 Jul 7;10:e65331. doi: 10.7554/eLife.65331 (PMC8263057; doi:10.7554/eLife.65331)
Supplement: Figure 5—source data 1. — IDEOM metabolite list and metadata from HILIC metabolomics study for untreated cells and cells treated with cordycepin for 40 min. [file elife-65331-fig5-data1.xlsx]

## Sheet: Single
PeakID			Individual	Samples
Mass				Intensity
RT
FORMULA			Raw Peaks	12C
Isomers
name
confidence
Map
Pathway
DB
TrypDB
KEGGid#
INCHIkey
Synonyms
SMILES
logD (9)
pos (9)
neg (9)
HBD
HBA
RT%err
Polarity
Charge
Adduct
PPMc
altPPM
Cisotope %error
Related peaks
BP
mzdiff
relation.ship
addfrag
Groups
max intensity
RSD:QC
maxRSD
Detections
codadw
EIC Rel Intensity
Isomeric peaks

## Sheet: Significant
Putative metabolite (Yellow are confirmed metabolites)	Metabolite name used in map	Fold change after 40 minutes cordycepin treatment
alpha,alpha'-Trehalose 6-phosphate	trehalose-6P	4.45258
alpha,alpha-Trehalose	trehalose	3.79636
Glu-Asp-Thr		3.37678
N6-(1,2-Dicarboxyethyl)-AMP	adenylosuccinate	3.28981
Acetyl-CoA	acetyl CoA	3.12962
CTP	CTP	2.66735
dCTP	dCTP	2.4908
Hildgardtene		2.41159
UTP	UTP	2.40102
IMP	IMP	2.2729
Uridine	uridine	2.16629
Ala-Phe-Asn-Arg		2.15587
sn-Glycerol 3-phosphate		2.13729
Pro-Pro-Pro-Tyr		2.10799
3',5'-Cyclic AMP	cAMP	2.09149
Phytosphingosine-1-P		2.07132
Imidazol-5-yl-pyruvate		2.05045
Glycerol		1.99795
(S)-Dihydroorotate	dihydroorotate	1.9973
NADH		1.99584
CDP	CDP	1.99458
dTTP	dTTP	1.99216
D-Sedoheptulose 7-phosphate	sedoheptulose-7P	1.94109
[PC methyl(9:2)]		1.92573
[FA hydroxy(14:0)] 3,11-dihydroxy-tetradecanoic acid		1.87663
3-beta-D-Galactosyl-sn-glycerol		1.82711
3,4-Dihydroxy-2-butanone 4-phosphate		1.81059
Glycerone		1.77409
FA hydroxy(12:0) dodecanoic acid		1.77362
O-Propanoylcarnitine		1.75935
Decanoic acid		1.75922
3-(Methylthio)propionic acid		1.72367
Sinapyl alcohol		1.71598
UDP	UDP	1.70773
dADP	dADP	1.6698
2-Methyl-1-hydroxypropyl-ThPP		1.66483
4-Hydroxyphenylacetate		1.6484
2-Deoxy-D-ribose 5-phosphate	deoxyribose-5P	1.63871
Ala-Ile-Gln-Ile		1.6291
Nicotinate		1.60694
Shikimate 3-phosphate		1.60609
dCDP	dCDP	1.57583
Thr-Pro-Pro		1.55945
N-Formimino-L-aspartate		1.55911
Pentanoate		1.55616
Orotidine 5'-phosphate	orotidine-5P	1.55523
4-Amino-4-deoxychorismate		1.55269
GDP-mannose		1.54241
CDP-glucose	CDP-glucose	1.54006
(1R,4S)-fenchan-2-one		1.52761
Pyridoxine		1.51723
3-Ethylmalate		1.5145
Ile-Lys-Ser		1.51423
L-Histidinal		1.50288
4,8-Dimethyl-1,3E,7-nonatriene		1.4969
4alpha-Methylzymosterol-4-carboxylate		1.48914
3-(4-Hydroxyphenyl)pyruvate		1.46396
Trp-Asn-Gly		1.46115
FA oxo(15:0)		1.46073
Ile-Lys-Val		1.45762
Ile-Pro-Pro-Pro		1.44946
(S)-Malate	malate	1.43935
Lys-Val-His		1.42987
FA (14:2) tetradecadienal		1.42767
Asn-Pro-Pro		1.42251
D-Ribulose 5-phosphate	ribulose-5P	1.40414
NADP+		1.39913
PE(32:0)		1.39439
Ala-Leu-Trp-Gln		1.37549
Pro-Arg		1.37361
2,3-Dimethylmaleate		1.36815
FA oxo(13:0) tridecanoic acid		1.36793
Xylitol		1.36386
PE(30:1)		1.363
4-Aminobenzoate		1.36244
Ile-Arg		1.35147
ADP	ADP	1.35128
Ala-Lys-Val-Pro		1.34836
Arg-Val-Gly-Pro		1.34792
Ile-Arg-Pro		1.3398
Asn-Asp-Pro-Pro		1.33149
Ala-Lys-Gly-Gly		1.32999
Ile-Ala-Ser		1.31934
3-Dehydroquinate		1.31299
Lupinisoflavone G		1.31244
Thr-Ala-Pro		1.29343
UDP-glucose	UDP-glucose	1.29298
(R)-2,3-Dihydroxy-3-methylbutanoate		1.28734
PA(32:1)		1.28322
3-(Pyrazol-1-yl)-L-alanine		1.28034
Ile-His-Lys		1.27523
Ile-Arg-Gly		1.27518
3-(Uracil-1-yl)-L-alanine		1.26545
N-Acetyl-L-glutamate 5-semialdehyde		1.26373
Ser-Tyr		1.25385
Gly-Arg		1.25
C16 Sphinganine-1-phosphate		1.24645
Trp-Ser		1.24018
NAD+		1.24016
Ala-Leu-Ala-Gln		1.23111
Ala-Gly-Arg		1.23013
N-Carbamoylsarcosine		1.22164
Glutathione		1.2059
PE(32:2)		1.19788
L-Aspartate		1.17727
Gly-Gly-Pro		1.16118
Lys-Asn-Gly		1.14992
Gln-Leu-Lys-Tyr		0.874719
Ile-Gly-Ser		0.870128
Dopamine		0.828543
L-erythro-4-Hydroxyglutamate		0.820459
Glu-Glu		0.81227
[PS(16:0)] 1-hexadecanoyl-sn-glycero-3-phosphoserine		0.760209
5-Acetamidopentanoate		0.752607
9-mercaptodethiobiotin		0.748774
Ala-Asp-Gln-Gln		0.746972
N6-(L-1,3-Dicarboxypropyl)-L-lysine		0.737377
[FA dioxo(8:0)] 4,7-dioxo-octanoic acid		0.731743
(S)-2-Acetolactate		0.711853
Ile-Ala-Ser		0.705226
L-Glutamyl 5-phosphate		0.697761
Pantetheine 4'-phosphate		0.629922
[FA trimethyl(13:2)] tridecadienoic acid		0.629028
Xanthine	xanthine	0.61679
FA methyl (7:1)		0.609553
5'-Phosphoribosyl-N-formylglycinamide	FGAR	0.596132

## Sheet: InitialHM
Putative metabolite	cordycepinMC2_00_1	cordycepinMC2_00_2	cordycepinMC2_00_3	cordycepinMC2_00_4	cordycepinMC2_00_5	cordycepinMC2_00_6	cordycepinMC2_05_1	cordycepinMC2_05_2	cordycepinMC2_05_3	cordycepinMC2_05_4	cordycepinMC2_10_1	cordycepinMC2_10_2	cordycepinMC2_10_3	cordycepinMC2_10_4	cordycepinMC2_10_5	cordycepinMC2_10_6	cordycepinMC2_20_1	cordycepinMC2_20_2	cordycepinMC2_20_3	cordycepinMC2_20_4	cordycepinMC2_20_5	cordycepinMC2_20_6	cordycepinMC2_40_1	cordycepinMC2_40_2	cordycepinMC2_40_3	cordycepinMC2_40_4	cordycepinMC2_40_6	QC1	QC2	QC3	QC4	Map	Mass	RT
303.293																																	303.293	0.094671
115.944																																	115.944	3.63798
208.061																																	208.061	3.64429
490.313																																	490.313	3.68785
PG(34:1)																																Lipids: Glycerophospholipids	748.525	3.80403
491.317																																	491.317	3.8125
503.317																																	503.317	3.81273
474.29																																	474.29	3.83363
PE(32:0)																																Lipids: Glycerophospholipids	691.515	3.85085
sodium dodecyl sulfate																																0	266.155	3.85544
PE(30:0)																																Lipids: Glycerophospholipids	663.484	3.85726
2-Dodecylbenzenesulfonic acid																																0	326.192	3.85905
PA(34:1)																																Lipids: Glycerophospholipids	674.488	3.86082
PA(34:2)																																Lipids: Glycerophospholipids	672.473	3.86179
N-Undecylbenzenesulfonic acid																																0	312.176	3.87425
PA(32:2)																																Lipids: Glycerophospholipids	644.442	3.8839
PA(32:1)																																Lipids: Glycerophospholipids	646.457	3.88505
FA hydroxy(26:0)																																Lipids: Fatty Acyls	412.392	3.88518
PS(34:1)																																Lipids: Glycerophospholipids	761.52	3.93195
PS(34:2)																																Lipids: Glycerophospholipids	759.505	3.93506
Docosanoic acid																																Lipids: Fatty Acyls	340.334	3.93638
PI(36:1)																																Lipids: Glycerophospholipids	864.573	3.93751
Cohibin C																																Lipids: Fatty Acyls	576.511	3.93911
PI(34:2)																																Lipids: Glycerophospholipids	834.526	3.95666
PS(32:1)																																Lipids: Glycerophospholipids	733.489	3.96002
PI(34:1)																																Lipids: Glycerophospholipids	836.542	3.96106
L-2-Hydroxyphytanate																																0	328.298	3.96107
PS(32:2)																																Lipids: Glycerophospholipids	731.474	3.96405
FA oxo(18:0)																																Lipids: Fatty Acyls	298.251	3.96413
1,9S,11R,15S-tetrahydroxy-13E-prostaene																																Lipids: Fatty Acyls	342.277	3.96856
FA (20:0)																																Lipids: Fatty Acyls	312.303	3.97244
PS(30:1)																																Lipids: Glycerophospholipids	705.458	3.97694
PI(32:2)																																Lipids: Glycerophospholipids	806.495	3.97954
PI(32:1)																																Lipids: Glycerophospholipids	808.51	3.98063
Cohibin A																																Lipids: Fatty Acyls	548.479	3.98397
[FA hydroxy(22:0)] 13,14-dihydroxy-docosanoic acid																																Lipids: Fatty Acyls	372.324	3.98645
[FA trimethyl(13:2)] tridecadienoic acid																																Lipids: Fatty Acyls	266.188	3.99059
PI(30:0)																																Lipids: Glycerophospholipids	782.494	3.99201
PI(30:1)																																Lipids: Glycerophospholipids	780.478	3.99795
Octadecanoic acid																																Lipids: Fatty Acyls	284.272	4.0008
FA (18:1)																																Lipids: Fatty Acyls	282.256	4.00727
FA (17:0)																																Lipids: Fatty Acyls	270.256	4.01074
PI(28:0)																																Lipids: Glycerophospholipids	754.463	4.02237
115.944																																	115.944	4.03319
PI(28:1)																																Lipids: Glycerophospholipids	752.448	4.03511
FA(16:0)																																Lipids: Fatty Acyls	256.24	4.0447
[FA hydroxy(20:0)] dihydroxy-eicosanoic acid																																Lipids: Fatty Acyls	344.293	4.04535
PI(26:0)																																Lipids: Glycerophospholipids	726.432	4.04812
743.463																																	743.463	4.05681
[PR] bacteriohopane-32,33,34,35-tetrol																																Lipids: Prenols	546.465	4.06413
FA(16:1)																																Lipids: Fatty Acyls	254.225	4.06455
FA methyl(14:0)																																Lipids: Fatty Acyls	242.225	4.06739
[FA dimethyl(13:0)] 2,5-dimethyl-2E-tridecenoic acid																																Lipids: Fatty Acyls	240.209	4.06913
PE(36:2)																																Lipids: Glycerophospholipids	743.547	4.07185
Tetradecanoic acid																																Lipids: Fatty Acyls	228.209	4.07866
295.187																																	295.187	4.08529
[SP hydrox] 4-hydroxysphinganine																																Lipids: Sphingolipids	317.293	4.08795
FA oxo(16:0)																																Lipids: Fatty Acyls	270.22	4.08844
Dehydrophytosphingosine																																Lipids: Sphingolipids	315.278	4.09016
Phytuberin																																0	294.183	4.0969
PE(34:2)																																Lipids: Glycerophospholipids	715.515	4.09708
FA hydroxy(18:1)]																																Lipids: Fatty Acyls	314.246	4.09725
FA hydroxy(18:0)																																Lipids: Fatty Acyls	300.267	4.09967
2,3-Dihydroxycyclopentaneundecanoic acid																																0	286.214	4.10075
2S-Hydroxytetradecanoic acid																																Lipids: Fatty Acyls	244.204	4.10683
PE(30:1)																																Lipids: Glycerophospholipids	661.469	4.10956
N-(2-hydroxypentadecanoyl)-phytosphingosine																																0	557.502	4.12335
FA oxo(15:0)																																Lipids: Fatty Acyls	256.204	4.13152
FA methyl(12:0) dodecanoic acid																																Lipids: Fatty Acyls	214.193	4.1333
N-(2-hydroxyundecanoyl)-phytosphingosine																																0	501.439	4.13463
Phytuberin																																0	294.183	4.13979
4alpha-Methylzymosterol-4-carboxylate																																Lipid Metabolism	442.345	4.14849
FA hydroxy(16:0)																																Lipids: Fatty Acyls	288.23	4.15219
FA hydroxy(16:0)] hexadecanoic acid																																Lipids: Fatty Acyls	272.235	4.16113
FA oxo(13:0) tridecanoic acid																																Lipids: Fatty Acyls	228.173	4.17545
4&alpha;-carboxy-5&alpha;-cholesta-8,24-dien-3&beta;-ol																																0	428.329	4.1803
Dodecanoic acid																																Lipids: Fatty Acyls	200.178	4.18285
Diisononyl phthalate																																0	418.308	4.18412
Stoloniferone G																																Lipids: Sterol lipids	460.318	4.18456
N-(2-hydroxytridecanoyl)-phytosphingosine																																0	529.471	4.18787
359.303																																	359.303	4.19102
270.147																																	270.147	4.19345
[FA oxo(16:2)] cyclopentanehexanoic acid																																Lipids: Fatty Acyls	268.204	4.19843
[FA oxo(14:0)] 3-oxo-tetradecanoic acid																																Lipids: Fatty Acyls	242.188	4.19954
FA(16:1)																																Lipids: Fatty Acyls	254.225	4.20205
FA hydroxy(12:0) dodecanoic acid																																Lipids: Fatty Acyls	216.172	4.20777
FA oxo(19:0)																																Lipids: Fatty Acyls	312.266	4.22058
PE(34:1)																																Lipids: Glycerophospholipids	717.53	4.22256
PE(32:1)																																Lipids: Glycerophospholipids	689.499	4.23272
303.241																																	303.241	4.24848
PE(32:2)																																Lipids: Glycerophospholipids	687.484	4.26225
2-Ethylhexyl phthalate																																0	278.152	4.26429
Pubesenolide																																Lipids: Prenols	458.303	4.26596
[FA (11:0)] undecanoic acid																																Lipids: Fatty Acyls	186.162	4.26805
[FA hydroxy(14:0)] 3,11-dihydroxy-tetradecanoic acid																																Lipids: Fatty Acyls	260.199	4.27139
345.288																																	345.288	4.28525
PS(38:1)																																Lipids: Glycerophospholipids	817.584	4.29958
gamma-Undecalactone																																0	184.146	4.30621
PC(36:2)																																Lipids: Glycerophospholipids	785.594	4.30994
Decanoic acid																																Lipids: Fatty Acyls	172.146	4.31186
Stoloniferone J																																Lipids: Sterol lipids	458.34	4.31272
271.178																																	271.178	4.32579
Tributyl phosphate																																0	266.165	4.32749
237.086																																	237.086	4.33145
254.152																																	254.152	4.33162
PC(34:2)																																Lipids: Glycerophospholipids	757.562	4.34473
149.96																																	149.96	4.34909
(+/-)-5-[(tert-Butylamino)-2'-hydroxypropoxy]-1,2,3,4-tetrahydro-1- naphthol																																0	293.199	4.35319
xi-8-Hydroxyhexadecanedioic acid																																Lipids: Fatty Acyls	302.209	4.35601
13-14-DihydroPGF-1a																																0	358.272	4.35972
PS(36:1)																																Lipids: Glycerophospholipids	789.552	4.36237
FA methyl(18:3)																																Lipids: Fatty Acyls	324.23	4.36638
FA (22:0)																																Lipids: Fatty Acyls	314.319	4.36675
PE(26:0)																																Lipids: Glycerophospholipids	607.422	4.36806
FA hydroxy(10:0)																																Lipids: Fatty Acyls	188.141	4.36993
Cumene																																0	120.094	4.37606
PC(32:2)																																Lipids: Glycerophospholipids	729.531	4.37709
375.298																																	375.298	4.37813
352.202																																	352.202	4.38054
[PS(18:1)] 1-(9Z-octadecenoyl)-sn-glycero-3-phosphoserine																																Lipids: Glycerophospholipids	523.291	4.38355
4-Oxo-13-cis-retinoate																																0	313.181	4.38488
(E)-3,7-Dimethylocta-1,6-diene-3,8-diol																																0	170.131	4.3854
alpha-Methylstyrene																																0	118.078	4.38822
Pentylbenzene																																0	148.125	4.39079
3,5,7-Trimethyl-2E,4E,6E,8E-undecatetraene																																Lipids: Fatty Acyls	190.172	4.39172
210.103																																	210.103	4.3918
Apiole																																0	222.089	4.39361
PC(30:1)																																Lipids: Glycerophospholipids	703.515	4.39363
PC(30:2)																																Lipids: Glycerophospholipids	701.499	4.39854
3-Oxododecanoic acid																																Lipids: Fatty Acyls	214.157	4.40115
FA methyl(15:0) tridecanedioic acid																																Lipids: Fatty Acyls	258.183	4.40996
1-Methyl-1,3-cyclohexadiene																																0	94.0782	4.4105
FA (14:2) tetradecadienal																																Lipids: Fatty Acyls	208.183	4.41892
Lauroyl diethanolamide																																Lipids: Fatty Acyls	287.246	4.42069
(1R,4S)-fenchan-2-one																																Lipids: Prenols	152.12	4.42424
FA (16:2)																																Lipids: Fatty Acyls	252.209	4.42563
4,8-Dimethyl-1,3E,7-nonatriene																																Lipids: Fatty Acyls	150.141	4.42939
FA (8:1) octenal																																Lipids: Fatty Acyls	126.105	4.42974
PC(28:0)																																Lipids: Glycerophospholipids	677.499	4.43063
891.488																																	891.488	4.43411
FA hydroxy(9:0) hydroxy-nonanoic acid																																Lipids: Fatty Acyls	174.126	4.43454
Santene																																Lipids: Prenols	122.109	4.43459
FA methyl(8:0)																																Lipids: Fatty Acyls	158.131	4.43549
[PI(18:0)] 1-octadecanoyl-sn-glycero-3-phospho-(1'-myo-inositol)																																Lipids: Glycerophospholipids	600.328	4.44104
alpha-Irone																																0	206.167	4.44301
[FA (6:0)] hexanal																																Lipids: Fatty Acyls	100.089	4.44408
FA oxo(12:1)																																Lipids: Fatty Acyls	212.141	4.45082
PC(26:0)]																																Lipids: Glycerophospholipids	649.469	4.45638
Bakkenolide A																																0	234.162	4.45885
Acidissiminin epoxide																																Lipids: Prenols	675.485	4.46186
3',4',5'-Trimethoxycinnamyl alcohol acetate																																0	266.116	4.47456
FA methyl (8:1)																																Lipids: Fatty Acyls	156.115	4.47712
N-Hexadecanoylpyrrolidine																																0	309.303	4.4778
[PS(16:0)] 1-hexadecanoyl-sn-glycero-3-phosphoserine																																Lipids: Glycerophospholipids	497.275	4.48233
alpha-Butyl-omega-hydroxypoly(oxyethylene) poly(oxypropylene)																																0	248.199	4.48403
Phenylacetaldehyde																																Amino Acid Metabolism	120.058	4.48534
FA (13:2) tridecadienoic acid																																Lipids: Fatty Acyls	210.162	4.48677
[FA (18:1)] 9Z-octadecenamide																																Lipids: Fatty Acyls	281.272	4.49061
371.34																																	371.34	4.49151
3-Ketosphingosine																																0	297.267	4.49514
Pubescenol																																Lipids: Prenols	474.298	4.4986
225.173																																	225.173	4.49962
1-a-24R-25-TrihydroxyvitaminD2																																Lipids: Sterol lipids	444.324	4.50085
PS(16:1)																																Lipids: Glycerophospholipids	495.26	4.50148
[FA hydroxy(11:1)] undecenoic acid																																Lipids: Fatty Acyls	200.141	4.51026
LysoPE(18:0)																																Lipids: Glycerophospholipids	481.316	4.52182
Stoloniferone G																																Lipids: Sterol lipids	460.319	4.53572
4-Hexyloxyphenol																																0	194.131	4.54002
FA (8:2) octadienal																																Lipids: Fatty Acyls	124.089	4.54633
[PI(16:0)] 1-hexadecanoyl-sn-glycero-3-phospho-(1'-myo-inositol)																																Lipids: Glycerophospholipids	572.296	4.54821
[FA amino(14:0)] 2-amino-tetradecanoic acid																																Lipids: Fatty Acyls	243.22	4.55774
Sphenostylin D																																Lipids: Polyketides	402.168	4.55816
919.52																																	919.52	4.55951
LysoPE(18:1)																																Lipids: Glycerophospholipids	479.301	4.56165
[ST (12:0) homo-seco-cholestatrien-tetrol																																Lipids: Sterol lipids	442.308	4.56434
Dimethyl succinate																																0	146.058	4.5698
[PR] (-)-Asbestinine 2																																Lipids: Prenols	476.314	4.58026
Benzofuran																																0	118.042	4.58046
FA (8:0) octanoic acid																																Lipids: Fatty Acyls	144.115	4.58287
2E-butenoic acid																																Lipids: Fatty Acyls	86.0367	4.58446
2-trans,6-trans-Farnesal																																Biosynthesis of Secondary Metabolites	220.183	4.58479
Dihydroceramide																																Lipids: Sphingolipids	329.293	4.58747
13'-Hydroxy-gama-tocotrienol																																0	426.313	4.59128
417.215																																	417.215	4.59386
5-Hexyltetrahydro-2-oxo-3-furancarboxylic acid																																0	214.121	4.60135
PS(14:0/0:0)																																Lipids: Glycerophospholipids	469.244	4.60767
233.076																																	233.076	4.61346
N-Lauroylglycine																																0	257.199	4.6153
Phenyl acetate																																0	136.052	4.62028
Ergosta-5,7,22,24(28)-tetraen-3beta-ol																																Lipid Metabolism	394.324	4.62253
233.108																																	233.109	4.64061
FA (10:2) Decadienoic acid																																Lipids: Fatty Acyls	168.115	4.64138
[SP] 3-dehydrosphinganine																																Lipids: Sphingolipids	299.283	4.6468
498.276																																	498.276	4.66181
PI(14:0)																																Lipids: Glycerophospholipids	544.265	4.6859
212.072																																	212.072	4.69017
Euparotin acetate																																0	418.163	4.69081
PA(34:6)																																Lipids: Glycerophospholipids	664.409	4.69372
4&alpha;-hydroxymethyl-5&alpha;-cholesta-8,24-dien-3&beta;-ol																																0	414.35	4.69409
1,1-Dimethoxydecane																																Lipid Metabolism	202.193	4.69515
FA (9:2) nonadienal																																Lipids: Fatty Acyls	138.104	4.69585
304.146																																	304.146	4.69752
Stoloniferone F																																Lipids: Sterol lipids	462.335	4.69974
Phenylethyl alcohol																																Amino Acid Metabolism	122.073	4.71779
Castasterone																																Biosynthesis of Secondary Metabolites	464.35	4.71821
Homoarecoline																																0	169.11	4.71853
3beta-Hydroxy-5alpha-cholest-7-ene-4alpha-carboxylate																																0	430.345	4.73332
5-Hydroxy-4-pentenoic acid d-lactone																																0	98.0368	4.73382
Stylisterol B																																0	446.34	4.73504
189.082																																	189.082	4.73841
PS(12:0/0:0)																																Lipids: Glycerophospholipids	441.213	4.73905
LysoPA(16:0)																																Lipids: Glycerophospholipids	410.243	4.74866
S-Propyl 1-propanesulfinothioate																																0	166.048	4.74972
222.104																																	222.104	4.75271
Octadecanamide																																Lipids: Fatty Acyls	283.288	4.75626
FA oxo(10:0)																																Lipids: Fatty Acyls	186.126	4.76095
[ST (3:0)] ergosta-5,7,22E-trien-3beta-ol																																Lipids: Sterol lipids	396.339	4.76112
Undecanoylcholine																																0	271.251	4.76321
N-Undecanoylglycine																																0	243.183	4.76323
Isoleucyl-Phenylalanine																																Peptides	278.163	4.76602
Palmiticamide																																0	255.256	4.76867
[FA hydroxy(11:0)] undecanoic acid																																Lipids: Fatty Acyls	202.157	4.77115
3-(Methylthio)propyl acetate																																0	148.056	4.78938
[FA (10:0/2:0)] Decanedioic acid																																Lipids: Fatty Acyls	202.121	4.79638
250.178																																	250.178	4.80564
FA methyl(6:0)																																Lipids: Fatty Acyls	130.099	4.80806
5-exo-Hydroxy-1,2-campholide																																0	184.11	4.81582
(3R,7R)-1,3,7-Octanetriol																																Lipids: Fatty Acyls	162.126	4.81988
FA methyl(6:1)																																Lipids: Fatty Acyls	128.084	4.82304
PI(12:0/0:0)																																Lipids: Glycerophospholipids	516.234	4.82762
277.153																																	277.153	4.83452
[PR] (+)-Bornane-2,5-dione																																Lipids: Prenols	166.099	4.83971
FA (8:1)																																Lipids: Fatty Acyls	142.099	4.84267
286.133																																	286.133	4.84324
1-Phenyl-1-pentanone																																0	162.104	4.84408
Damascenine																																0	195.089	4.84839
[ST hydrox] 3alpha,7alpha-Dihydroxy-5beta-cholan-24-oic Acid																																Lipids: Sterol lipids	392.293	4.85754
444.281																																	444.282	4.85906
303.277																																	303.277	4.86263
Furfural diethyl acetal																																0	170.094	4.87504
4-Methyl-2-oxopentanoate																																Amino Acid Metabolism	130.063	4.8808
Phenylpyruvate																																Amino Acid Metabolism	164.047	4.89249
Phencyclidine																																0	243.198	4.89515
LysoPC(18:1)																																Lipids: Glycerophospholipids	521.348	4.90696
N-Decanoylglycine																																0	229.168	4.91407
N-(6-Aminohexanoyl)-6-aminohexanoate																																0	244.179	4.92334
PA(18:1(9Z)/0:0)																																Lipids: Glycerophospholipids	436.258	4.93456
215.189																																	215.189	4.94102
1,3,5-trimethoxybenzene																																Biosynthesis of Secondary Metabolites	168.079	4.9498
[LysoPC(14:1)] 1-(9Z-tetradecenoyl)-sn-glycero-3-phosphocholine																																Lipids: Glycerophospholipids	465.286	4.952
N-hexanoyl-D,L-homoserine lactone																																0	199.121	4.95577
FA oxo(9:0) oxo-nonanoic acid																																Lipids: Fatty Acyls	172.11	4.9565
[FA oxo(8:1)] 5-oxo-7-octenoic acid																																Lipids: Fatty Acyls	156.079	4.95996
xi-1-Ethoxy-1-pentyloxyethane																																0	160.146	4.97398
607.378																																	607.378	4.98165
328.309																																	328.309	4.99233
413.182																																	413.182	4.99277
2-Hydroxycyclohexan-1-one																																Xenobiotics Biodegradation and Metabolism	114.068	4.99467
LysoPE(16:0)																																Lipids: Glycerophospholipids	453.286	4.99847
534.302																																	534.302	5.00443
[SP (14:0)] 1-deoxy-tetradecasphinganine																																Lipids: Sphingolipids	229.241	5.00841
Palmitoylglycerone phosphate																																0	408.227	5.00975
2S-Amino-tridecanoic acid																																Lipids: Fatty Acyls	229.204	5.01001
5-Oxo-1,2-campholide																																0	182.094	5.0114
Valyl-Phenylalanine																																Peptides	264.147	5.01203
LysoPC(16:0)																																Lipids: Glycerophospholipids	495.332	5.02473
179.095																																	179.095	5.02661
Phenylpropanoate																																Amino Acid Metabolism	150.068	5.02687
LysoPE(0:0/16:1(9Z))																																Lipids: Glycerophospholipids	451.27	5.02816
methionol																																0	106.045	5.03231
Methionyl-Leucine																																Peptides	262.135	5.03312
Methionyl-Leucine																																Peptides	262.135	5.0355
LysoPC(16:1)																																Lipids: Glycerophospholipids	493.317	5.03916
N-Nonanoylglycine																																0	215.152	5.04195
FA (9:2) nonadienoic acid																																Lipids: Fatty Acyls	154.099	5.04945
181.041																																	181.041	5.06126
488.202																																	488.202	5.06269
Hexanoic acid																																Lipids: Fatty Acyls	116.084	5.06677
4-Nitroanisole																																0	153.043	5.08881
431.273																																	431.273	5.0952
Tryptophyl-Leucine																																Peptides	317.174	5.09559
LysoPE(0:0/14:0)																																Lipids: Glycerophospholipids	425.254	5.09717
[FA hydroxy(9:0)] 2-hydroxy-nonanoic acid																																Lipids: Fatty Acyls	174.125	5.09767
N,N-Dimethylaniline																																0	121.089	5.10543
Ethyl (R)-3-hydroxyhexanoate																																0	160.11	5.11144
Sinapyl alcohol																																Biosynthesis of Secondary Metabolites	210.089	5.11151
N-Acetyl-L-phenylalanine																																Amino Acid Metabolism	207.09	5.11406
Marimastat																																Amino Acid Metabolism	331.211	5.11838
[LysoPC(14:0)] 1-tetradecanoyl-sn-glycero-3-phosphocholine																																Lipids: Glycerophospholipids	467.301	5.1197
N-Heptanoylglycine																																0	187.121	5.12539
Valyl-Leucine																																Peptides	230.163	5.12669
Ethyl (R)-3-hydroxybutanoate																																0	132.079	5.13127
LysoPC(12:0)																																Lipids: Glycerophospholipids	439.269	5.13439
7-oxoheptanoate																																Metabolism of Cofactors and Vitamins	144.079	5.13662
[FA oxo,methyl(4:0)] 2-oxo-4-methylthio-butanoic acid																																Amino Acid Metabolism	148.02	5.13821
228.174																																	228.174	5.13997
340.173																																	340.173	5.1404
ethyl propionate																																Lipids: Fatty Acyls	102.068	5.14147
Hexanoylglycine																																0	173.105	5.14213
Dimethyl adipate																																0	174.089	5.14575
CoA																																Carbohydrate Metabolism	255.705	5.14756
Succinic anhydride																																0	100.016	5.15039
2,2,6,6-Tetramethyl-4-piperidinone																																0	155.131	5.15052
Tyrosyl-Leucine																																Peptides	294.158	5.15071
Phenyllactate																																Amino Acid Metabolism	166.063	5.15109
Hildgardtene																																Lipids: Polyketides	320.141	5.15142
370.222																																	370.222	5.15472
301.188																																	301.188	5.15476
96.6766																																	96.6766	5.15485
trans-Hexadec-2-enoyl-CoA																																Lipid Metabolism	501.665	5.15548
384.237																																	384.237	5.15614
4-Hydroxyphenylacetaldehyde																																Amino Acid Metabolism	136.053	5.15625
Lupinisoflavone G																																Lipids: Polyketides	422.173	5.15741
Nonate																																0	188.105	5.15771
Polypropylene glycol (m w 1,200-3,000)																																0	134.094	5.15844
Valyl-Valine																																Peptides	216.147	5.1588
C16 Sphinganine-1-phosphate																																Lipids: Sphingolipids	353.233	5.16267
Phytosphingosine-1-P																																Lipids: Sphingolipids	397.259	5.16392
LysoPC(10:0)																																Lipids: Glycerophospholipids	411.239	5.16519
255.168																																	255.168	5.16627
[SP (17:0)] heptadecasphinganine																																Lipids: Sphingolipids	287.282	5.16993
1,3-Octadiene																																Lipids: Fatty Acyls	110.11	5.17218
Diethyl tartrate																																0	206.079	5.17345
Octane-1,8-diol																																0	146.131	5.17739
3,4-dichloro-tridecanoic acid																																Lipids: Fatty Acyls	282.115	5.18312
Tyrosyl-Valine																																Peptides	280.142	5.18326
203.08																																	203.08	5.18508
646.398																																	646.398	5.18564
[FA dioxo(8:0)] 4,7-dioxo-octanoic acid																																Lipids: Fatty Acyls	172.074	5.19277
Phenylalanyl-Threonine																																Peptides	266.126	5.19571
Monomethylglutaricacid																																0	146.058	5.19998
386.216																																	386.216	5.20854
N-Butyryl-L-homoserine lactone																																Lipids: Fatty Acyls	171.09	5.22061
181.023																																	181.023	5.2209
2-oxo-6-methylthiohexanoate																																0	176.051	5.23167
N-(3-oxooctanoyl)-L-homoserine																																0	259.142	5.23604
Damascenine																																0	195.09	5.23724
6-Acetamido-2-oxohexanoate																																Amino Acid Metabolism	187.085	5.24109
328.121																																	328.121	5.24487
6-Acetamido-3-oxohexanoate																																0	187.085	5.2489
FA methyl (7:1)																																Lipids: Fatty Acyls	142.099	5.25243
Valerylglycine																																0	159.09	5.25688
Homoarecoline																																0	169.11	5.25965
219.101																																	219.101	5.26089
150.035																																	150.035	5.26117
Alpinumisoflavone dimethyl ether																																Lipids: Polyketides	364.131	5.26599
188.106																																	188.106	5.27283
175.03																																	175.03	5.28479
5-Ethyl-2,4-dimethyloxazole																																0	125.084	5.2871
Alanyl-Isoleucine																																Peptides	202.132	5.29844
194.115																																	194.115	5.30194
Tetraacetylethylenediamine																																0	228.111	5.30517
O-Propanoylcarnitine																																Lipids: Fatty Acyls	217.132	5.30878
Pantetheine																																Metabolism of Cofactors and Vitamins	278.13	5.31112
O-Propanoylcarnitine																																Lipids: Fatty Acyls	217.131	5.3164
S-Acetylphosphopantetheine																																0	400.107	5.32018
Phenylalanyl-Histidine																																Peptides	302.138	5.34142
227.091																																	227.091	5.3551
4-Hydroxyphenylacetate																																Amino Acid Metabolism	152.047	5.36402
formyl 3-hydroxy-butanoate																																Lipids: Fatty Acyls	118.063	5.38342
(3S,5R)-carbapenam																																Biosynthesis of Secondary Metabolites	155.058	5.40771
Phenylalanyl-Glutamine																																Peptides	293.138	5.4149
280.1																																	280.1	5.41937
3-acetyl-3-methyldihydrofuran-2(3H)-one																																Lipids: Fatty Acyls	142.063	5.44418
191.152																																	191.152	5.45342
Pantothenol																																Metabolism of Cofactors and Vitamins	205.132	5.48701
Leucyl-Histidine																																Peptides	268.154	5.50183
119.912																																	119.911	5.50815
Metazachlor																																0	277.099	5.5411
L-Cladinose																																0	176.105	5.56849
3,4-Dehydrothiomorpholine-3-carboxylate																																0	145.02	5.60248
2 -(Butylamido)-4-hydroxybutanoic acid																																0	189.1	5.62061
121.909																																	121.909	5.63709
Trimethyl-2-propenylpyrazine																																0	162.116	5.67348
405.213																																	405.213	5.69059
113.084																																	113.084	5.71104
L-2-Amino-3-methylenehexanoic acid																																Amino Acid Metabolism	143.095	5.72427
Methylthio 2-(propanoyloxy)propanoate																																0	176.051	5.82951
123.906																																	123.906	5.83942
140.095																																	140.095	5.85167
180.019																																	180.019	5.89404
Isobutyrylglycine																																0	145.074	5.95645
2 -(Butylamido)-4-hydroxybutanoic acid																																0	189.1	5.97084
Histidinyl-Methionine																																Peptides	286.11	6.055
113.084																																	113.084	6.05782
388.805																																	388.805	6.05906
O6-Methyl-2'-deoxyguanosine																																0	281.113	6.20475
257.067																																	257.067	6.27532
2-oxo-6-methylthiohexanoate																																0	176.051	6.30436
123.032																																	123.032	6.30604
114.087																																	114.087	6.40274
4-Hydroxyphenylacetaldehyde																																Amino Acid Metabolism	136.052	6.52486
216.043																																	216.043	6.53139
113.084																																	113.084	6.58957
193.879																																	193.879	6.62868
3,3'-Thiobispropanoic acid																																Lipids: Fatty Acyls	178.03	6.63272
4-Hydroxy-2,6-dimethylaniline																																Xenobiotics Biodegradation and Metabolism	137.084	6.63328
Ethyl 2-(methylthio)acetate																																Lipids: Fatty Acyls	134.04	6.7818
2'-O-Methyladenosine																																0	281.112	6.79299
3-Aminobenzenesulfonate																																0	173.015	6.79875
194.061																																	194.061	6.81938
N-hydroxyvaline																																0	133.074	6.98127
113.084																																	113.084	7.01342
4-Hydroxyphenylethanol																																Amino Acid Metabolism	138.068	7.01471
2-Hydroxyethanesulfonate																																Amino Acid Metabolism	125.999	7.03535
Orcinol																																0	124.053	7.08283
Ethyl 1-(propylthio)propyl disulfide																																0	210.056	7.10338
115.944																																	115.944	7.11094
S,S-Dimethyl-beta-propiothetin																																0	134.04	7.12977
methylmethanesulfonate																																0	110.004	7.13682
147.916																																	147.916	7.15628
299.195																																	299.195	7.2013
Scytalone																																0	194.058	7.37435
626.426																																	626.426	7.48022
1-(O-alpha-D-glucopyranosyl)-3-keto-(25R,27R)-octacosanediol																																Lipids: Fatty Acyls	618.472	7.48463
2-trans,4-cis-Decadienoylcarnitine																																0	311.21	7.50193
128.095																																	128.095	7.50594
194.061																																	194.061	7.51768
FA ethyl(6:0)																																Lipids: Fatty Acyls	144.115	7.5325
Arecoline																																0	155.095	7.53411
9-Oxononanoic acid																																Lipids: Fatty Acyls	172.11	7.53689
[FA hydroxy(10:0)] 3-hydroxy-decanoic acid																																Lipids: Fatty Acyls	188.141	7.53879
1-Phenylethylamine																																Amino Acid Metabolism	121.089	7.53932
3-acetamidopropanal																																0	115.063	7.54395
FA oxo(8:0) oxo-octanoic acid																																Lipids: Fatty Acyls	158.094	7.55894
Zinnimidine																																0	261.137	7.56406
N-Decanoylglycine																																0	229.168	7.56896
N-Undecanoylglycine																																0	243.183	7.57599
Traumatic acid																																Lipids: Fatty Acyls	228.137	7.58234
FA hydroxy(6:0)																																Lipids: Fatty Acyls	132.079	7.58826
N-Nonanoylglycine																																0	215.152	7.58889
(1S,3R,4S)-3,4-Dihydroxycyclohexane-1-carboxylate																																0	160.074	7.59018
FA hydroxy(8:0) hydroxy-octanoic acid																																Lipids: Fatty Acyls	160.11	7.59379
Secobarbital																																0	238.132	7.59397
[SP (14:0)] 1-deoxy-tetradecasphinganine																																Lipids: Sphingolipids	229.241	7.5959
5-Hydroxypentanoate																																Lipids: Fatty Acyls	118.063	7.59846
[FA hydroxy(9:0)] 3-hydroxy-nonanoic acid																																Lipids: Fatty Acyls	174.126	7.5988
186.089																																	186.089	7.6004
Ethyladipicacid																																0	174.089	7.6012
Ursodiol																																Lipids: Sterol lipids	392.293	7.60426
Maleamate																																Metabolism of Cofactors and Vitamins	115.027	7.60569
2,3-Dimethylmaleate																																Metabolism of Cofactors and Vitamins	144.042	7.60799
FA oxo(7:0)																																Lipids: Fatty Acyls	144.079	7.60895
Butanoic acid																																Carbohydrate Metabolism	88.0523	7.60971
452.336																																	452.336	7.61492
4-methylthiobutylhydroximate																																0	165.028	7.61558
Pentanoate																																Lipids: Fatty Acyls	102.068	7.61615
1,4-Lactone																																0	86.0366	7.61726
p-Benzenediol																																Amino Acid Metabolism	110.037	7.62026
FA hydroxy(7:0)																																Lipids: Fatty Acyls	146.094	7.6207
Ile-Val																																Peptide(di-)	230.163	7.6219
2-oxobut-3-enanoate																																0	100.016	7.62396
167.116																																	167.116	7.62452
3-Amino-2-oxazolidone																																0	102.043	7.62453
2-Octenedioicacid																																0	172.074	7.63217
150.089																																	150.089	7.63537
Phenylacetic acid																																Amino Acid Metabolism	136.053	7.63655
357.642																																	357.642	7.63898
Deoxyribose																																Carbohydrate Metabolism	134.058	7.64234
(R)-2,3-Dihydroxy-3-methylpentanoate																																Amino Acid Metabolism	148.074	7.64369
PE(18:1)																																Lipids: Glycerophospholipids	479.302	7.64415
Ile-Tyr																																Peptide(di-)	294.158	7.64537
Ala-Leu-Val-Gly																																Peptide(tetra-)	358.222	7.64613
Val-Tyr																																Peptide(di-)	280.142	7.64763
Ile-Ala-Pro																																Peptide(tri-)	299.184	7.64763
2-hydroxy-4-methylthiobutanoate																																0	150.035	7.64851
PI(16:1)																																Lipids: Glycerophospholipids	570.28	7.64887
Ala-Leu-Ala-Ala																																Peptide(tetra-)	344.206	7.64895
4-Hydroxyphenylacetate																																Amino Acid Metabolism	152.047	7.64899
3-(Methylthio)propionic acid																																Amino Acid Metabolism	120.025	7.65048
246.159																																	246.159	7.65056
3-sulfopropanoate																																0	153.994	7.65058
[PI(16:0)] 1-hexadecanoyl-sn-glycero-3-phospho-(1'-myo-inositol)																																Lipids: Glycerophospholipids	572.296	7.65155
Ile-Gly-Val																																Peptide(tri-)	287.185	7.65209
4-Oxocyclohexanecarboxylate																																0	142.063	7.65246
LysoPE(16:1)																																Lipids: Glycerophospholipids	451.27	7.65281
[PI(18:0)] 1-octadecanoyl-sn-glycero-3-phospho-(1'-myo-inositol)																																Lipids: Glycerophospholipids	600.328	7.65406
N-Acetylputrescinium																																0	130.111	7.65549
1-Pyrroline-4-hydroxy-2-carboxylate																																Amino Acid Metabolism	129.043	7.65555
6-Amino-2-oxohexanoate																																Amino Acid Metabolism	145.074	7.65577
PS(16:1(9Z)/0:0)																																Lipids: Glycerophospholipids	495.26	7.6558
Pantetheine																																Metabolism of Cofactors and Vitamins	278.13	7.65611
Phe-Thr																																Peptide(di-)	266.127	7.65684
3,4-dichloro-tridecanoic acid																																Lipids: Fatty Acyls	282.115	7.65762
(S)-ATPA																																0	228.111	7.6582
Sambutoxin																																Lipids: Prenols	453.289	7.6594
IPC(t42:0(OH))																																Lipids: Sphingolipids	925.662	7.65975
N-Formyl-L-methionine																																Amino Acid Metabolism	177.046	7.66048
2-Acetolactate																																Carbohydrate Metabolism	132.042	7.66196
Acanthicifoline																																0	192.09	7.66214
Ile-Pro-Thr																																Peptide(tri-)	329.195	7.66458
Ile-Pro-Ser																																Peptide(tri-)	315.18	7.66547
Val-Val																																Peptide(di-)	216.147	7.66654
LysoPC(16:1(9Z))																																Lipids: Glycerophospholipids	493.317	7.66903
Ile-Ala																																Peptide(di-)	202.132	7.66919
PE(19:0)																																Lipids: Glycerophospholipids	495.332	7.66948
C16 Sphinganine-1-phosphate																																Lipids: Sphingolipids	353.233	7.67092
[PC methyl(9:2)]																																Lipids: Glycerophospholipids	397.259	7.67551
1-Methyladenosine																																0	281.112	7.67643
allylcysteine																																0	161.051	7.67757
PC(18:1)																																Lipids: Glycerophospholipids	521.348	7.67817
4-Nitroaniline																																0	138.043	7.68034
3-Hydroxyhexobarbital																																0	252.111	7.68268
3-nitro-2-pentanol																																0	133.074	7.68277
Hexanoylglycine																																0	173.105	7.68283
5'-Methylthioadenosine																																Amino Acid Metabolism	297.09	7.68455
3-(4-Hydroxyphenyl)pyruvate																																Amino Acid Metabolism	180.042	7.69077
N4-Acetylaminobutanal																																Amino Acid Metabolism	129.079	7.69108
delta1-Piperideine-2-carboxylate																																Amino Acid Metabolism	127.063	7.69124
156.09																																	156.09	7.69367
N-(2-hydroxyhexacosanoyl)-4R-hydroxysphinganine-1-O-[D-mannopyranosyl-alpha1-2-myo-inositol-1-phosphate]																																Lipids: Sphingolipids	1115.74	7.69436
Ile-Pro-Pro																																Peptide(tri-)	325.2	7.69672
Ile-Thr																																Peptide(di-)	232.142	7.69777
S-Acetyldihydrolipoamide																																0	249.086	7.69945
99.032																																	99.032	7.70128
Thymine																																Nucleotide Metabolism	126.043	7.70133
Hexadeceylamin																																0	241.277	7.71086
Pentanamide																																Lipids: Fatty Acyls	101.084	7.71364
Sphinganine																																Lipids: Sphingolipids	301.298	7.71675
Histidinyl-Phenylalanine																																Peptides	302.138	7.71937
L-Cladinose																																0	176.105	7.71959
234.111																																	234.111	7.72434
Nicotinate																																Metabolism of Cofactors and Vitamins	123.032	7.72634
beta-D-Digitalopyranose																																0	178.084	7.73242
HBA																																0	103.063	7.73797
Nicotinamide																																Metabolism of Cofactors and Vitamins	122.048	7.738
L-isoleucyl-L-proline																																0	228.147	7.74351
O-Propanoylcarnitine																																Lipids: Fatty Acyls	217.131	7.74447
2-hydroxy-4-carboxypyrimidine																																0	140.022	7.79613
559.312																																	559.312	7.80607
Acetylcysteine																																Xenobiotics Drugs etc	163.03	7.81162
Thiodiglycol																																0	122.04	7.81693
Hydroxypropionylcarnitine																																0	233.126	7.83365
cis-Acetylacrylate																																Xenobiotics Biodegradation and Metabolism	114.032	7.85315
165.01																																	165.01	7.86116
A-Ketoglutaricacidoxime																																0	161.032	7.879
EPTC																																0	189.119	7.88593
1-Pyrimidinylpiperazine																																0	164.106	7.91385
Hexadecasphinganine																																Lipids: Sphingolipids	273.267	7.92642
Dambonitol																																Carbohydrate Metabolism	208.095	7.94071
Bendiocarb																																0	223.084	7.94667
[SP hydrox] 4-hydroxysphinganine																																Lipids: Sphingolipids	317.293	7.94897
(2R,3R,4R)-2-Amino-4-hydroxy-3-methylpentanoic acid																																Amino Acid Metabolism	147.09	7.95571
His-Leu																																Peptide(di-)	268.153	7.97648
116.095																																	116.095	7.98283
Glycyl-leucine																																Peptide(di-)	188.116	7.99184
Ile-Ala-Ser																																Peptide(tri-)	289.164	7.99717
(2S)-2-{[1-(R)-Carboxyethyl]amino}pentanoate																																0	189.1	8.05146
536.299																																	536.299	8.0582
Pyridoxal																																Metabolism of Cofactors and Vitamins	167.058	8.07151
Cordycepin																																0	251.102	8.08005
Ile-Pro-Ser																																Peptide(tri-)	315.18	8.08652
1-Pyrroline-2-carboxylate																																Amino Acid Metabolism	113.048	8.08718
Pyridoxine																																Metabolism of Cofactors and Vitamins	169.074	8.10034
1,9-Nonanedithiol																																0	192.101	8.11879
L-Histidinal																																Amino Acid Metabolism	139.075	8.12403
190.041																																	190.041	8.12798
Met-Thr																																Peptide(di-)	250.099	8.14026
306.11																																	306.109	8.14593
670.464																																	670.464	8.15329
6-Acetamido-2-oxohexanoate																																Amino Acid Metabolism	187.085	8.16114
Caproylcholine																																0	201.173	8.17464
Metazachlor																																0	277.098	8.17584
L-2-Amino-5-hydroxypentanoic acid																																Amino Acid Metabolism	133.074	8.17706
Ile-Ser																																Peptide(di-)	218.127	8.18775
153.054																																	153.054	8.19844
181.049																																	181.049	8.19914
Octylamine																																0	129.152	8.20024
198.064																																	198.064	8.23531
120.079																																	120.079	8.24379
213.246																																	213.246	8.26312
2-Oxoglutaramate																																Amino Acid Metabolism	145.038	8.26628
N1-Methyl-2-pyridone-5-carboxamide																																Metabolism of Cofactors and Vitamins	152.059	8.26682
2-Pyrrolidinone																																0	85.0527	8.28457
194.069																																	194.069	8.28688
Histidinyl-Valine																																Peptides	254.138	8.32491
8-Oxocoformycin																																0	282.097	8.33199
Phe-Gly																																Peptide(di-)	222.1	8.35796
Ile-Ala-Gly																																Peptide(tri-)	259.153	8.37807
213.075																																	213.075	8.38542
263.137																																	263.137	8.4131
Febrifugine																																0	301.143	8.41697
(R)-2,3-Dihydroxy-3-methylbutanoate																																Amino Acid Metabolism	134.058	8.45122
9-mercaptodethiobiotin																																Metabolism of Cofactors and Vitamins	246.104	8.45258
N4-Acetylcytidine																																0	285.096	8.45394
Thr-Trp																																Peptide(di-)	305.137	8.4549
5-Methylthio-D-ribose																																Amino Acid Metabolism	180.046	8.4598
Pantothenate																																Amino Acid Metabolism	219.111	8.4682
5-Chloro-1,3-dihydro-1-(4-piperidinyl)-2H-benzimidazol-2-one																																0	251.083	8.47307
256.082																																	256.082	8.48281
(Ac)2-L-Lys-D-Ala-D-Ala																																0	372.201	8.50255
112.064																																	112.064	8.50977
Cyclohexane-1,3-dione																																0	112.052	8.51778
Methionyl-Histidine																																Peptides	286.11	8.54532
2-mercaptoglutarate																																0	164.014	8.56014
Leu-Gly-Pro																																Peptide(tri-)	285.169	8.56275
Ile-Gly-Gly																																Peptide(tri-)	245.138	8.56415
Ala-Val-Gly-Pro																																Peptide(tetra-)	342.19	8.56897
Uracil																																Nucleotide Metabolism	112.027	8.57535
Biotin																																Metabolism of Cofactors and Vitamins	244.088	8.57945
S-Acetylphosphopantetheine																																0	400.107	8.59342
Ala-Leu-Gly-Gly																																Peptide(tetra-)	316.175	8.60115
Val-Pro																																Peptide(di-)	214.132	8.60582
205.95																																	205.95	8.60886
L-Glutamate 5-semialdehyde																																Amino Acid Metabolism	131.058	8.60946
488.313																																	488.313	8.62722
3-Hydroxyisoheptanoicacid																																Lipids: Fatty Acyls	146.094	8.64938
215.84																																	215.84	8.66382
N-Acetyl-L-glutamate 5-semialdehyde																																Amino Acid Metabolism	173.069	8.69085
Val-Gly-Pro																																Peptide(tri-)	271.153	8.69173
5,6-Dihydroxy-3-methyl-2-oxo-1,2-dihydroquinoline																																0	191.058	8.70584
Riboflavin																																Metabolism of Cofactors and Vitamins	376.138	8.72302
Nicotinurate																																Metabolism of Cofactors and Vitamins	180.054	8.72992
Tryptophyl-Histidine																																Peptides	341.149	8.7408
Deoxyinosine																																Nucleotide Metabolism	252.086	8.749
Ile-Pro-Pro-Pro																																Peptide(tetra-)	422.253	8.75084
Ile-Gly-Ser																																Peptide(tri-)	275.148	8.79912
181.095																																	181.095	8.82966
Vinylacetylglycine																																0	143.058	8.85629
211.088																																	211.088	8.87002
2-Dehydro-D-xylonate																																0	164.032	8.87797
5-D-(5/6)-5-C-(Hydroxymethyl)-2,6-dihydroxycyclohex-2-en-1-one																																0	158.058	8.88758
(3S,5S)-carbapenam																																Biosynthesis of Secondary Metabolites	155.058	8.8943
&gamma;-glutamyl-L-alaninol																																0	204.111	8.90555
157.971																																	157.971	8.91746
Valyl-Histidine																																Peptides	254.138	8.92658
Met-Ala-Gly																																Peptide(tri-)	277.11	9.01942
Methylimidazole acetaldehyde																																Amino Acid Metabolism	124.064	9.02904
6-Acetamido-3-aminohexanoate																																0	188.116	9.03817
theanine																																0	174.1	9.04533
Ala-Leu-Gly-Ser																																Peptide(tetra-)	346.185	9.05282
N-Acetyl-L-glutamate 5-semialdehyde																																Amino Acid Metabolism	173.069	9.05934
Imidazole-4-methanol																																0	98.048	9.10427
Ile-Ser-Ser																																Peptide(tri-)	305.159	9.10732
227.09																																	227.091	9.11314
Adenosine																																Nucleotide Metabolism	267.097	9.11444
Trp-Ser																																Peptide(di-)	291.122	9.13053
162.072																																	162.072	9.13579
N-Ethylmaleimide																																0	125.048	9.13875
147.973																																	147.973	9.14747
Ile-Ala-Ser																																Peptide(tri-)	289.164	9.16125
Val-Pro-Ser																																Peptide(tri-)	301.164	9.16641
Ala-Val-Asn-Pro																																Peptide(tetra-)	399.211	9.16656
Glycerone																																Lipid Metabolism	90.0316	9.17401
3',5'-Cyclic AMP																																Nucleotide Metabolism	329.053	9.18125
1-(beta-D-Ribofuranosyl)-1,4-dihydronicotinamide																																0	256.106	9.18413
Hydroxyprolyl-Histidine																																Peptides	268.117	9.18788
Potassium 2-(1'-ethoxy) ethoxypropanoate																																0	200.045	9.21612
488.205																																	488.205	9.23178
N-Succinyl-L-glutamate 5-semialdehyde																																Amino Acid Metabolism	231.074	9.24682
N6-Acetyl-N6-hydroxy-L-lysine																																Amino Acid Metabolism	204.111	9.25569
Fasoracetam																																0	196.121	9.2578
Asn-Leu-Met-Val																																Peptide(tetra-)	475.246	9.26963
CAPS																																Medium Component	221.108	9.29105
321.065																																	321.065	9.29614
5-Methylcytidine																																0	257.101	9.29633
L-Glutamate methylester																																0	161.069	9.29799
Glu-Val-Val																																Peptide(tri-)	345.19	9.30103
(S)-1-Pyrroline-5-carboxylate																																Amino Acid Metabolism	113.048	9.31327
548.325																																	548.325	9.3133
[Fv] 4'-O-Methylxanthohumol																																Lipids: Polyketides	368.162	9.36246
673.445																																	673.445	9.3784
Triethanolamine																																0	149.105	9.37927
211.088																																	211.088	9.3969
Dephospho-CoA																																Metabolism of Cofactors and Vitamins	687.149	9.41304
CHAPS																																0	614.397	9.41715
654.353																																	654.353	9.41946
163.03																																	163.03	9.42076
186.112																																	186.112	9.43789
161.015																																	161.015	9.44862
N-Acetyl-L-glutamate 5-semialdehyde																																Amino Acid Metabolism	173.069	9.47406
(S)-5'-Deoxy-5'-(methylsulfinyl)adenosine																																Nucleotide Metabolism	313.084	9.47516
Ile-Asn																																Peptide(di-)	245.138	9.47992
400.28																																	400.28	9.4955
2,3-Diaminosalicylic acid																																0	168.053	9.51715
Adenine																																Nucleotide Metabolism	135.054	9.52399
291.072																																	291.072	9.55735
Psicofuranin																																0	297.107	9.56444
2-Hydroxyadenine																																0	151.049	9.56526
Ala-Thr-Ala-Pro																																Peptide(tetra-)	358.185	9.57275
D-Glucose																																Carbohydrate Metabolism	180.063	9.57899
S-Methyl-1-thio-D-glycerate																																0	136.019	9.5903
Val-Gly-Pro																																Peptide(tri-)	271.153	9.61719
215.955																																	215.955	9.61863
Ala-Ala-Ala																																Peptide(tri-)	231.122	9.61965
199.981																																	199.981	9.62186
5-Methylcytosine																																Nucleotide Metabolism	125.059	9.64214
Jasminine																																0	220.085	9.64599
Lys-Tyr																																Peptide(di-)	309.169	9.65093
Thr-Tyr																																Peptide(di-)	282.122	9.65156
(1S,4S)-4-Hydroxy-3-oxocyclohexane-1-carboxylate																																0	158.058	9.66512
2-Oxosuccinamate																																Amino Acid Metabolism	131.022	9.66892
341.17																																	341.17	9.67579
L-Aspartate 4-semialdehyde																																Amino Acid Metabolism	117.043	9.67988
209.126																																	209.126	9.68094
Orotate																																Nucleotide Metabolism	156.017	9.68283
514.114																																	514.114	9.68811
Creatinine																																Amino Acid Metabolism	113.059	9.70038
3-Methylguanine																																0	165.065	9.7004
145.004																																	145.004	9.71888
N-Methylcalystegine B2																																0	189.1	9.73166
Met-Gly																																Peptide(di-)	206.072	9.7357
alpha-Ribazole																																Metabolism of Cofactors and Vitamins	278.127	9.74032
Pantetheine 4'-phosphate																																Metabolism of Cofactors and Vitamins	358.096	9.75269
3-Dehydroxycarnitine																																Amino Acid Metabolism	145.11	9.76588
400.087																																	400.087	9.76761
Ala-Thr-Ala-Ala																																Peptide(tetra-)	332.17	9.77412
Ile-Ile-Lys																																Peptide(tri-)	372.273	9.78379
(R)-2-Hydroxyglutarate																																Amino Acid Metabolism	148.037	9.79768
4-Hydroxybenzoate																																Metabolism of Cofactors and Vitamins	138.032	9.7989
Ala-Ala-Ala-Pro																																Peptide(tetra-)	328.175	9.80201
Uridine																																Nucleotide Metabolism	244.07	9.81588
2-Deoxy-D-glucose																																0	164.069	9.82194
Glu-Cys-Phe																																Peptide(tri-)	397.131	9.82912
Orotate(Fragment)																																Nucleotide Metabolism	112.027	9.83938
3-Ethylmalate																																Carbohydrate Metabolism	162.053	9.84883
Ala-Gly-Tyr																																Peptide(tri-)	309.132	9.8629
Trp-Asn																																Peptide(di-)	318.133	9.86506
N-Acetyl-L-histidine																																0	197.08	9.87638
5-Oxoproline																																Amino Acid Metabolism	129.043	9.88688
N,N-dihydroxyvaline																																0	149.069	9.89456
4-Aminobenzoate																																Xenobiotics Biodegradation and Metabolism	137.048	9.91692
Val-Pro-Pro																																Peptide(tri-)	311.185	9.92088
Imidazol-5-yl-pyruvate																																Amino Acid Metabolism	154.038	9.9209
Prolyl-Histidine																																Peptides	252.122	9.9288
(S)-farnesyl thiopyrophosphate																																0	398.108	9.93439
Glu-Ile-Pro-Ser																																Peptide(tetra-)	444.222	9.9441
303.037																																	303.037	9.97562
287.063																																	287.063	9.98016
Trp-Gly																																Peptide(di-)	261.111	9.983
D-Glucose oxime																																0	195.075	9.98492
L-Formylkynurenine																																Amino Acid Metabolism	236.08	10.0003
253.104																																	253.104	10.0028
5-6-Dihydrouridine																																0	246.085	10.027
Neuromedin B (1-3)																																0	302.16	10.0393
N-Formyl-L-glutamate																																Amino Acid Metabolism	175.048	10.0527
5-6-Dihydrouridine																																0	246.085	10.056
Hypoxanthine																																Nucleotide Metabolism	136.038	10.0561
2-Benzothiazolesulfonamide																																0	213.987	10.0638
4-Oxoglutaramate																																Amino Acid Metabolism	145.038	10.0649
Ala-Ala-Ala																																Peptide(tri-)	231.122	10.0714
4-methylthiobutanaldoxime																																0	133.056	10.0749
Glu-Thr-Tyr																																Peptide(tri-)	411.165	10.0875
Slaframine																																Biosynthesis of Secondary Metabolites	240.147	10.0993
gamma-Amino-gamma-cyanobutanoate																																Amino Acid Metabolism	128.059	10.1163
Ala-Leu-Asp-Cys																																Peptide(tetra-)	420.168	10.1206
8-Oxodeoxycoformycin																																0	266.101	10.1246
L-Phenylalanine																																Amino Acid Metabolism	165.079	10.1316
Asp-Val-Asp-Ser																																Peptide(tetra-)	434.165	10.1345
Ala-Ala-Ala-Gln																																Peptide(tetra-)	359.181	10.1363
Ile-Arg-Val																																Peptide(tri-)	386.264	10.1558
Phenolphthalin																																0	320.104	10.1795
D-Apiitol																																0	136.074	10.194
Dihydroclavaminic acid																																Biosynthesis of Secondary Metabolites	200.08	10.1984
delta(L-2-Aminoadipyl)-L-cysteinyl-D-valine																																Biosynthesis of Secondary Metabolites	363.146	10.2173
N-Acetylglutamine																																0	188.08	10.2221
(S)-Lactate																																Carbohydrate Metabolism	90.0316	10.2269
Glycerol																																Carbohydrate Metabolism	92.0472	10.2389
612.408																																	612.408	10.264
2-Isopropylmaleate																																Amino Acid Metabolism	158.058	10.2644
Ala-Val-Asp-Pro																																Peptide(tetra-)	400.196	10.2673
213.075																																	213.075	10.2971
2-O-Methylcytosine																																0	125.059	10.3007
N5-Ethyl-L-glutamine																																0	174.1	10.3274
Urocanate																																Amino Acid Metabolism	138.043	10.3592
Aspartyl-Alanine																																Peptides	204.075	10.3698
Pantothenol																																Metabolism of Cofactors and Vitamins	205.132	10.3749
Ile-Ile-Ile-Ile																																Peptide(tetra-)	470.347	10.376
Pro-Pro-Pro-Tyr																																Peptide(tetra-)	472.233	10.3857
211.088																																	211.088	10.4013
(S)-Carnitine																																0	161.105	10.4022
Pyruvate oxime																																0	103.027	10.4084
Ser-Tyr																																Peptide(di-)	268.106	10.4099
Trp-Asn-Gly																																Peptide(tri-)	375.154	10.4474
a Cysteine adduct																																Medium Contaminant	191.025	10.4593
Trp-Asn-Gly																																Peptide(tri-)	375.154	10.4739
225.075																																	225.075	10.4802
D-Glucuronate																																Carbohydrate Metabolism	194.043	10.4909
cis-4-Octenedioicacid																																0	172.074	10.4955
&gamma;-thiomethyl glutamate																																0	193.041	10.5023
N-Acetyl-L-glutamate 5-semialdehyde																																Amino Acid Metabolism	173.069	10.509
Azelaic acid																																Xenobiotics Drugs etc	188.105	10.532
Ile-Lys-Val																																Peptide(tri-)	358.258	10.5389
183.064																																	183.064	10.5402
172.004																																	172.004	10.5474
Asp-Leu-Pro-Pro																																Peptide(tetra-)	440.227	10.5721
Asp-Leu-Thr-Pro																																Peptide(tetra-)	444.222	10.5755
5-Methylcytidine																																0	257.101	10.6054
(S)-Dihydroorotate																																Nucleotide Metabolism	158.033	10.6217
741.506																																	741.506	10.622
4-Imidazolone-5-propanoate																																Amino Acid Metabolism	156.053	10.6221
L-gamma-glutamyl-L-isoleucine																																Peptides	260.137	10.6228
Ala-Gly-Pro-Ser																																Peptide(tetra-)	330.154	10.6398
Phe-Asp																																Peptide(di-)	280.106	10.6402
Norophthalmicacid																																0	275.112	10.6415
5-Hydroxytryptophan																																0	220.085	10.6482
3-Amino-2-piperidone																																0	114.079	10.6545
1-O-Methyl-myo-inositol																																Carbohydrate Metabolism	194.079	10.6575
284.171																																	284.171	10.6664
4-Methyl-5-(2-phosphoethyl)-thiazole																																Metabolism of Cofactors and Vitamins	223.007	10.6764
(6R)-6-(L-Erythro-1,2-Dihydroxypropyl)-5,6,7,8-tetrahydro-4a-hydroxypterin																																0	226.107	10.683
2,5-Dioxopentanoate																																Carbohydrate Metabolism	130.027	10.6833
L-Kynurenine																																Amino Acid Metabolism	208.085	10.7275
allopurinol																																0	136.038	10.7336
Formylanthranilate																																Amino Acid Metabolism	165.043	10.7359
D-Alanyl-D-alanine																																Amino Acid Metabolism	160.085	10.7391
452.336																																	452.336	10.7446
L-Lathyrine																																0	182.08	10.7591
Inosine																																Nucleotide Metabolism	268.081	10.7705
Threoninyl-Aspartate																																Peptides	234.085	10.7717
Ala-Met-Met-His																																Peptide(tetra-)	488.187	10.7993
Glu-Ala-Val																																Peptide(tri-)	317.159	10.8003
Glu-Cys-Met																																Peptide(tri-)	381.103	10.8169
2-(alpha-Hydroxyethyl)thiamine diphosphate																																Carbohydrate Metabolism	468.063	10.8204
3-[4-amino-3-hydroxybutyl]-hydroxy-carbamoyl-propanoate																																0	220.106	10.8278
443.166																																	443.166	10.8314
N5-acetyl-N5-hydroxy-L-ornithine																																0	190.095	10.8317
L-Leucine																																Amino Acid Metabolism	131.095	10.8356
Ile-Cys-Thr																																Peptide(tri-)	335.151	10.8664
2,4-diacetamido-2,4,6-trideoxy-&beta;-L-altropyranose																																0	246.121	10.8699
N-Formimino-L-glutamate																																Amino Acid Metabolism	174.064	10.8725
188.043																																	188.043	10.8783
133.875																																	133.875	10.8929
Glu-Ile-Thr																																Peptide(tri-)	361.185	10.9106
275.721																																	275.721	10.911
Propanoyl phosphate																																Carbohydrate Metabolism	154.003	10.914
Xanthine																																Nucleotide Metabolism	152.033	10.9142
Gln-Pro																																Peptide(di-)	243.122	10.9344
Bicine																																0	163.084	10.9657
FMN																																Energy Metabolism	456.105	10.9683
FAD																																Metabolism of Cofactors and Vitamins	785.157	10.9755
L-2-Amino-3-oxobutanoic acid																																Amino Acid Metabolism	117.043	10.9823
Histidinyl-Threonine																																Peptides	256.117	10.9841
Valclavam																																0	329.159	10.9987
Imidazole-4-acetate																																Amino Acid Metabolism	126.043	11.0103
465.147																																	465.147	11.0141
627.421																																	627.421	11.0148
D-Threonine																																Amino Acid Metabolism	119.058	11.034
Asn-Pro-Pro																																Peptide(tri-)	326.159	11.0349
211.088																																	211.088	11.0389
Ala-Pro																																Peptide(di-)	186.1	11.0542
203.116																																	203.116	11.0596
4-Methylene-L-glutamate																																Carbohydrate Metabolism	159.053	11.0633
Ala-Met-Ala-Asp																																Peptide(tetra-)	406.152	11.068
Ala-Met-Asp-Cys																																Peptide(tetra-)	438.124	11.0776
N-Carboxyethyl-g-aminobutyricacid																																0	175.084	11.0911
213.842																																	213.842	11.0915
108.942																																	108.941	11.0923
L-gamma-glutamyl-L-leucine																																Peptides	260.137	11.0976
O-Acetyl-L-homoserine																																Amino Acid Metabolism	161.069	11.1092
Cytosine																																Nucleotide Metabolism	111.043	11.116
7-Hydroxy-6-methyl-8-ribityl lumazine																																Metabolism of Cofactors and Vitamins	328.102	11.1308
L-gamma-glutamyl-L-isoleucine																																Peptides	260.137	11.1482
Chelilutine																																0	377.125	11.2058
Dihydrozeatin-O-glucoside																																Biosynthesis of Secondary Metabolites	383.18	11.2216
198.05																																	198.05	11.2326
123.08																																	123.08	11.2524
Ala-Asn-Pro-Pro																																Peptide(tetra-)	397.196	11.2611
D-Glycerate																																Carbohydrate Metabolism	106.027	11.27
Ala-Asn-Asp-Gln																																Peptide(tetra-)	446.176	11.2745
N-Hydroxy-L-tyrosine																																Amino Acid Metabolism	197.069	11.278
Dopamine																																Amino Acid Metabolism	153.079	11.2861
Glu-Ala-Met																																Peptide(tri-)	349.131	11.2911
Asp-Gln																																Peptide(di-)	261.096	11.2915
Glu-Cys-Cys																																Peptide(tri-)	353.071	11.2925
129.018																																	129.017	11.2931
243.256																																	243.256	11.3025
Glu-Ile-Ser																																Peptide(tri-)	347.169	11.3065
339.252																																	339.252	11.3107
Glu-Gly-Val																																Peptide(tri-)	303.143	11.3161
380.18																																	380.18	11.3173
Gln-Pro-Ser																																Peptide(tri-)	330.154	11.3247
2-Deoxy-D-ribose 5-phosphate																																Carbohydrate Metabolism	214.025	11.3275
(2S)-2-Isopropylmalate																																Amino Acid Metabolism	176.068	11.3366
N5-formyl-N5-hydroxy-L-ornithine																																0	176.08	11.3882
172.004																																	172.004	11.3882
L-Methionine																																Amino Acid Metabolism	149.051	11.3893
FA (6:1)																																Lipids: Fatty Acyls	114.068	11.3996
L-beta-aspartyl-L-leucine																																Peptides	246.121	11.4044
Ile-Ile-Met																																Peptide(tri-)	375.219	11.4065
Ala-Pro-Ser-Ser																																Peptide(tetra-)	360.164	11.4075
2-Aminobutan-4-olide																																0	101.048	11.4219
Met-Phe-Gly																																Peptide(tri-)	353.141	11.4508
3-Methyleneoxindole																																0	145.053	11.468
L-Tryptophan																																Amino Acid Metabolism	204.09	11.4734
Indole																																Amino Acid Metabolism	117.058	11.4744
Ala-Asn																																Peptide(di-)	203.09	11.4775
Histidinyl-Histidine																																Peptides	292.128	11.48
Lys-Val-Pro																																Peptide(tri-)	342.226	11.4812
Histidinyl-Alanine																																Peptides	226.107	11.4857
Asp-Leu-Lys-Pro																																Peptide(tetra-)	471.27	11.5045
Ala-Pro-Ser																																Peptide(tri-)	273.132	11.5137
966.564																																	966.564	11.5415
Glycyl-Histidine																																Peptides	212.091	11.5526
gamma-Glutamyl-S-(1-propenyl)cysteine sulfoxide																																Peptides	306.089	11.5571
Glu-Met																																Peptide(di-)	278.094	11.605
274.116																																	274.116	11.6141
Orotidine																																0	288.059	11.6288
Cytosine																																Nucleotide Metabolism	111.043	11.6352
Orotate(Fragment)																																Nucleotide Metabolism	112.027	11.651
N-Acetyl-L-citrulline																																Amino Acid Metabolism	217.106	11.6652
N-hydroxy DAP																																0	206.09	11.6714
N-Methylnicotinate																																Metabolism of Cofactors and Vitamins	137.048	11.6776
198.056																																	198.056	11.6891
4-Amino-4-deoxychorismate																																Metabolism of Cofactors and Vitamins	225.064	11.6899
Thr-Pro-Pro																																Peptide(tri-)	313.164	11.6915
Ala-Ala-Ser																																Peptide(tri-)	247.117	11.6991
Convicine																																0	305.086	11.7033
Arginyl-Phenylalanine																																Peptides	321.18	11.7058
d-biotin d-sulfoxide																																0	260.083	11.7081
Kinobscurinone																																Biosynthesis of Polyketides and Nonribosomal Peptides	306.052	11.7153
N-Acetyl-D-glucosamine																																Amino Acid Metabolism	221.09	11.7277
2-acetamidoglucal																																0	203.08	11.7397
Leu-Thr																																Peptide(di-)	232.142	11.7706
Ala-Leu-Asp-Gly																																Peptide(tetra-)	374.18	11.7728
N2-(D-1-Carboxyethyl)-L-arginine																																Amino Acid Metabolism	246.133	11.7746
Glu-Pro-Val																																Peptide(tri-)	343.174	11.7805
Gamma-glutamyl-Histidine																																Peptides	283.128	11.7807
Cytidine																																Nucleotide Metabolism	243.086	11.7967
Pro-His																																Peptide(di-)	252.122	11.8004
[FA trihydroxy(4:0)] 2,3,4-trihydroxy-butanoic acid																																Carbohydrate Metabolism	136.037	11.8028
2'-methoxythiamin pyrophosphate																																0	440.032	11.8049
N-Formimino-L-aspartate																																Amino Acid Metabolism	160.048	11.8068
Ile-Gln																																Peptide(di-)	259.153	11.8231
Hydroxystilbamidine Isethionate																																0	532.13	11.8241
Pseudouridine																																Nucleotide Metabolism	244.07	11.8275
Lys-Phe																																Peptide(di-)	293.174	11.8433
His-Pro-Pro-Pro																																Peptide(tetra-)	446.228	11.8486
Ala-Ala-Asn																																Peptide(tri-)	274.128	11.86
172.109																																	172.109	11.8683
Acetyl-maltose																																0	384.127	11.8797
&alpha;-(2,6-anhydro-3-deoxy-D-arabino-heptulopyranosid)onate 7-phosphonate																																0	258.05	11.8834
401.154																																	401.154	11.8869
Ile-Arg-Gly																																Peptide(tri-)	344.217	11.8883
Asn-Pro-Ser																																Peptide(tri-)	316.138	11.8931
Acetyl-CoA																																Carbohydrate Metabolism	809.126	11.9044
Ala-Asn-Pro-Ser																																Peptide(tetra-)	387.176	11.9052
(S,S)-Np-Histidinylalanine																																Amino Acid Metabolism	242.102	11.9076
172.855																																	172.855	11.9326
5'-methylthioformycin																																0	297.089	11.933
Lys-Ser-Tyr																																Peptide(tri-)	396.201	11.944
Gln-Ser																																Peptide(di-)	233.101	11.9506
Glu-Glu-Met																																Peptide(tri-)	407.136	11.9537
Gly-Gly-Pro																																Peptide(tri-)	229.106	11.9596
Ala-Leu-Lys-Pro																																Peptide(tetra-)	427.279	11.9689
3-Dehydroquinate																																Amino Acid Metabolism	190.048	11.971
Ile-Arg-Thr																																Peptide(tri-)	388.244	11.9749
Glu-Thr																																Peptide(di-)	248.101	11.9851
Trp-Asp																																Peptide(di-)	319.117	11.9879
Ala-Met-Ala-Cys																																Peptide(tetra-)	394.135	11.9946
217.095																																	217.095	11.9946
Imidazole-4-acetaldehyde																																Amino Acid Metabolism	110.048	11.9965
368.127																																	368.127	12.004
532.263																																	532.263	12.0345
N-Formimino-L-glutamate																																Amino Acid Metabolism	174.064	12.0374
Alexine																																0	189.1	12.0375
Arg-Leu-Pro-Pro																																Peptide(tetra-)	481.301	12.0413
4-Methylene-L-glutamine																																Carbohydrate Metabolism	158.069	12.0545
4-Imidazolone-5-acetate																																Amino Acid Metabolism	142.038	12.061
Pyrimidine nucleoside																																0	214.095	12.0774
Ala-Lys-Gly-Tyr																																Peptide(tetra-)	437.228	12.0833
2-Methyl-1-hydroxypropyl-ThPP																																Amino Acid Metabolism	496.095	12.0867
(+)-Adlumine																																0	383.136	12.0923
Asn-Thr-Asp-Gln																																Peptide(tetra-)	476.187	12.0928
Allysine																																Amino Acid Metabolism	145.074	12.1098
316.01																																	316.01	12.111
Guanine																																Nucleotide Metabolism	151.049	12.1142
Ala-Pro-Ser-Ser																																Peptide(tetra-)	360.164	12.1173
Glycylproline																																Peptide(di-)	172.085	12.1185
N-hydroxyisoleucine																																0	147.09	12.1251
N-Formiminoglycine																																Nucleotide Metabolism	102.043	12.1307
L-beta-aspartyl-L-threonine																																Peptides	234.085	12.1429
dAMP																																Nucleotide Metabolism	331.068	12.1512
Cys-Lys-Met-Ser																																Peptide(tetra-)	467.187	12.1515
Ile-Arg-Pro																																Peptide(tri-)	384.249	12.1637
Glutaminyl-Histidine																																Peptides	283.128	12.169
Ala-Asn-Pro																																Peptide(tri-)	300.144	12.1826
2-Dehydro-D-xylonate																																0	164.032	12.185
268.128																																	268.128	12.1858
amiclenomycin																																0	196.121	12.1922
Ala-Gly-Pro																																Peptide(tri-)	243.122	12.1929
D-Erythrose 4-phosphate																																Carbohydrate Metabolism	200.009	12.1996
197.082																																	197.082	12.2045
N-Nitrosoproline																																0	144.054	12.2095
GDP-3,6-dideoxy-D-galactose																																0	573.087	12.2177
A771726																																0	270.062	12.2243
Glycerophosphoglycerol																																0	246.05	12.2278
Val-Gly																																Peptide(di-)	174.1	12.2329
Asn-Asp-Gln-Gln																																Peptide(tetra-)	503.198	12.2333
Glu-Ser-Val																																Peptide(tri-)	333.154	12.2415
Valclavam																																0	329.159	12.2491
211.088																																	211.088	12.2502
Ala-Lys-Val-Pro																																Peptide(tetra-)	413.263	12.2581
Lys-Met-Cys																																Peptide(tri-)	380.155	12.2637
Tetrahydro-2-methyl-3-thiophenethiol																																0	134.023	12.2841
Thr-Asn																																Peptide(di-)	233.101	12.3001
L-Valine																																Amino Acid Metabolism	117.079	12.3224
N5-formyl-N5-hydroxy-L-ornithine																																0	176.079	12.3329
Ala-Leu-Trp-Gln																																Peptide(tetra-)	516.269	12.3407
175.069																																	175.069	12.346
formycin A																																0	269.112	12.349
Ala-Leu-Thr-Ala																																Peptide(tetra-)	374.216	12.3499
Ile-Arg-Gly																																Peptide(tri-)	344.217	12.3504
Linatine																																Amino Acid Metabolism	259.117	12.3512
Ile-Lys-Thr																																Peptide(tri-)	360.237	12.363
Ile-Lys-Pro																																Peptide(tri-)	356.242	12.3682
Valyl-Lysine																																Peptides	245.173	12.3698
Ile-Ile-Val																																Peptide(tri-)	343.247	12.3717
D-erythro-Ascorbate																																0	146.022	12.3733
Glycyl-Serine																																Peptides	162.064	12.3807
369.084																																	369.084	12.3861
Pro-Arg																																Peptide(di-)	271.165	12.3877
Ala-Lys-Ala-Asn																																Peptide(tetra-)	402.222	12.3996
D-Arabinonate																																Carbohydrate Metabolism	166.047	12.4019
Proclavaminic acid																																Biosynthesis of Secondary Metabolites	202.095	12.4076
Ala-Lys-Gly-Gly																																Peptide(tetra-)	331.185	12.4205
Ile-Arg																																Peptide(di-)	287.196	12.4253
Guanosine																																Nucleotide Metabolism	283.092	12.4361
7-Methylguanine																																0	165.065	12.4423
Ala-Ile-Gln-Ile																																Peptide(tetra-)	443.274	12.4516
Ala-Val-Gly-Arg																																Peptide(tetra-)	401.238	12.4612
L-gamma-glutamyl-L-valine																																Peptides	246.122	12.4624
Asp-Lys-Val-Pro																																Peptide(tetra-)	457.254	12.4662
Asn-Gly-Pro-Ser																																Peptide(tetra-)	373.16	12.4676
gamma-L-Glutamyl-L-cysteinyl-beta-alanine																																0	321.1	12.4788
Ala-Gly-Gly																																Peptide(tri-)	203.091	12.4899
Asp-Leu-Met-Asp																																Peptide(tetra-)	492.189	12.4902
N2-Succinyl-L-arginine																																Amino Acid Metabolism	274.128	12.4954
N-Amidino-L-glutamate																																0	189.075	12.5056
Ile-Arg-His																																Peptide(tri-)	424.255	12.5316
Quinate																																Amino Acid Metabolism	192.063	12.532
618.363																																	618.363	12.5382
Ala-Met-Cys-His																																Peptide(tetra-)	460.156	12.5402
515.335																																	515.335	12.5436
Ala-Asp-Gln-Gln																																Peptide(tetra-)	460.192	12.5513
Ile-Lys																																Peptide(di-)	259.19	12.5594
2-Hydroxyethylphosphonate																																Amino Acid Metabolism	126.008	12.5654
N(pi)-Methyl-L-histidine																																Amino Acid Metabolism	169.085	12.5784
Ile-Ala-Thr																																Peptide(tri-)	303.18	12.6158
3-Hydroxy-L-kynurenine																																Amino Acid Metabolism	224.08	12.6364
4-Hydroxy-4-methylglutamate																																Carbohydrate Metabolism	177.064	12.6441
Ala-Asn-Gly																																Peptide(tri-)	260.112	12.6548
N6,N6-Dimethyladenosine																																0	295.127	12.6661
2-Amino-4-hydroxy-6-hydroxymethyl-7,8-dihydropteridine																																Metabolism of Cofactors and Vitamins	195.075	12.684
Ile-Ile-Pro																																Peptide(tri-)	341.232	12.6881
L-Proline																																Amino Acid Metabolism	115.063	12.6968
Ala-Ser																																Peptide(di-)	176.08	12.7026
Glu-Pro-Ser																																Peptide(tri-)	331.138	12.7241
1-O-methyl-&beta;-D-glucuronate																																0	208.058	12.7379
Xylitol																																Carbohydrate Metabolism	152.069	12.7457
319.084																																	319.084	12.7527
Serinyl-Serine																																Peptides	192.075	12.7543
Glu-Asp-Thr																																Peptide(tri-)	363.128	12.7575
Ile-Gly-Lys																																Peptide(tri-)	316.211	12.7612
De-O-methylsimmondsin																																0	361.138	12.787
524.127																																	524.127	12.7904
132.126																																	132.126	12.8132
NADH																																Energy Metabolism	665.125	12.8142
N6-Acetyl-L-lysine																																Amino Acid Metabolism	188.116	12.8156
Arg-Val-Gly-Pro																																Peptide(tetra-)	427.254	12.8172
Ala-Gln-Gln-Pro																																Peptide(tetra-)	442.217	12.8175
L-Tyrosine																																Amino Acid Metabolism	181.074	12.8185
Asn-Pro																																Peptide(di-)	229.106	12.8211
678.505																																	678.505	12.8376
Asn-Pro-Ser																																Peptide(tri-)	316.138	12.8575
Ile-His-Lys																																Peptide(tri-)	396.248	12.8581
332.079																																	332.079	12.862
L-Homocysteine																																Amino Acid Metabolism	135.035	12.8697
Glu-Met-Ser																																Peptide(tri-)	365.126	12.8818
Glu-Pro-Thr																																Peptide(tri-)	345.154	12.8845
Met-Arg																																Peptide(di-)	305.152	12.886
3,4-Dihydroxy-2-butanone 4-phosphate																																Metabolism of Cofactors and Vitamins	184.014	12.8918
387.246																																	387.246	12.9155
N2-Succinyl-L-ornithine																																Amino Acid Metabolism	232.106	12.9394
(S)-N-Methylcanadine																																0	353.162	12.9415
Ophthalmicacid																																0	289.127	12.9425
Asn-Cys-Pro-Ser																																Peptide(tetra-)	419.147	12.9445
Glycyrrhizaflavonol A																																Lipids: Polyketides	370.106	12.9508
Phe-Arg																																Peptide(di-)	321.18	12.9513
Asn-Ser																																Peptide(di-)	219.085	12.955
trans-S-(1-Propenyl)-L-cysteine																																Amino Acid Metabolism	161.051	12.958
L-Lysine 1,6-lactam																																Amino Acid Metabolism	128.095	12.9629
Gamma-Glutamyltyrosine																																Peptides	310.117	12.9705
187.028																																	187.028	12.9873
N-Acetylcystathionine																																0	264.078	12.994
Nicotinate D-ribonucleoside																																Metabolism of Cofactors and Vitamins	255.074	13.006
Histidinyl-Glycine																																Peptides	212.091	13.0082
3-beta-D-Galactosyl-sn-glycerol																																Carbohydrate Metabolism	254.1	13.0124
N2-Acetyl-L-aminoadipate																																Amino Acid Metabolism	203.08	13.0165
Lys-Met																																Peptide(di-)	277.146	13.0281
Lys-Val-Gly-Pro																																Peptide(tetra-)	399.248	13.0423
indole-S-cysteine-adduct																																0	266.073	13.0816
L-Methionine S-oxide																																Amino Acid Metabolism	165.046	13.0888
CoA																																Carbohydrate Metabolism	767.116	13.1061
(3R)-hydroxy-N-acetyl-(L)-arginine																																0	232.117	13.1178
286.06																																	286.06	13.1295
549.321																																	549.321	13.1325
3-Ethylmalate																																Carbohydrate Metabolism	162.053	13.1376
L-Glutamate 5-semialdehyde																																Amino Acid Metabolism	131.058	13.1394
dUMP																																Nucleotide Metabolism	308.041	13.1505
Fagomine																																0	147.09	13.1793
AMP																																Nucleotide Metabolism	347.063	13.18
Asp-Met-Gly-Ser																																Peptide(tetra-)	408.132	13.2116
Asp-Met-Met-Asp																																Peptide(tetra-)	510.146	13.2171
L-Carnitine																																Amino Acid Metabolism	161.105	13.2274
Thiomorpholine 3-carboxylate																																0	147.035	13.238
Cardiospermin																																0	275.101	13.2431
211.088																																	211.088	13.2444
Sedoheptulose																																Energy Metabolism	210.074	13.2699
N5-(L-1-Carboxyethyl)-L-ornithine																																0	204.111	13.2913
543.121																																	543.121	13.3093
731.185																																	731.185	13.3143
N-Carbamoylsarcosine																																Amino Acid Metabolism	132.054	13.3195
Lys-Trp																																Peptide(di-)	332.185	13.3245
Ile-Lys-Ser																																Peptide(tri-)	346.222	13.333
654.147																																	654.147	13.3405
2,3-Dimethylmaleate																																Metabolism of Cofactors and Vitamins	144.042	13.3418
N-(1-Deoxy-1-fructosyl)proline																																Carbohydrate Metabolism	277.116	13.3439
Asn-Lys-Val-Pro																																Peptide(tetra-)	456.269	13.3561
Asp-Pro-Ser																																Peptide(tri-)	317.122	13.3572
N-Acetylcystathionine																																0	264.078	13.3576
5D-5-O-Methyl-2,3,5/4,6-pentahydroxycyclohexanone																																0	192.063	13.3653
Ala-Leu-Val-Ser																																Peptide(tetra-)	388.232	13.3666
Asn-Asn																																Peptide(di-)	246.096	13.3675
Glu-Glu																																Peptide(di-)	276.096	13.37
S-Adenosyl-L-homocysteine																																Amino Acid Metabolism	384.122	13.3769
Anthocyanin 3'-O-beta-D-glucoside																																0	384.121	13.388
3-O-Methyl-myo-inositol																																Carbohydrate Metabolism	194.079	13.3905
Ala-Lys-Asn-Gly																																Peptide(tetra-)	388.207	13.4268
378.122																																	378.122	13.4273
218.04																																	218.04	13.4273
Neopterin																																Metabolism of Cofactors and Vitamins	253.081	13.4295
D-Gluconic acid																																Carbohydrate Metabolism	196.058	13.4301
211.105																																	211.105	13.4339
L-Glutamyl 5-phosphate																																Amino Acid Metabolism	227.02	13.4342
Lys-Val-Gly																																Peptide(tri-)	302.196	13.4352
L-prolinylglycine																																0	174.1	13.4566
Arg-Thr-Asp-Pro																																Peptide(tetra-)	487.239	13.4589
12-Deoxyaklanonic acid																																Biosynthesis of Polyketides and Nonribosomal Peptides	382.105	13.4609
N-Amidino-L-aspartate																																0	175.059	13.475
Val-Arg																																Peptide(di-)	273.18	13.4882
Gln-Gly																																Peptide(di-)	203.091	13.4894
Lys-Asn-Gly																																Peptide(tri-)	317.17	13.497
S-Ribosyl-L-homocysteine																																Amino Acid Metabolism	267.077	13.5046
4-Nitrophenyl-3-ketovalidamine																																0	296.101	13.5377
N,N-Dimethylglycine																																Amino Acid Metabolism	103.063	13.5406
N-Acetyl-L-glutamate																																Amino Acid Metabolism	189.064	13.5417
Lys-Val-Gly																																Peptide(tri-)	302.195	13.5678
Glu-Cys-His																																Peptide(tri-)	387.121	13.5692
Glycylproline																																Peptide(di-)	172.085	13.5734
3-Deoxy-D-manno-octulosonate																																Glycan Biosynthesis and Metabolism	238.069	13.5907
PIPES																																Medium Component	302.061	13.5971
Gentisate aldehyde																																Amino Acid Metabolism	138.032	13.5996
Val-Gly-Arg																																Peptide(tri-)	330.202	13.6033
gamma-L-Glutamyl-L-cysteine																																Amino Acid Metabolism	250.062	13.6188
L-1-Pyrroline-3-hydroxy-5-carboxylate																																Amino Acid Metabolism	129.043	13.6259
Ectoine																																Amino Acid Metabolism	142.074	13.6314
L-beta-aspartyl-L-glutamicacid																																Peptides	262.08	13.6349
609.145																																	609.145	13.6412
Fraxetin																																0	208.037	13.6439
Lys-Val																																Peptide(di-)	245.174	13.6609
Ile-Gly-Thr																																Peptide(tri-)	289.164	13.6698
2-(alpha-Hydroxyethyl)thiamine diphosphate																																Carbohydrate Metabolism	468.063	13.6798
Lys-Val-His																																Peptide(tri-)	382.233	13.6946
L-Iditol																																0	182.079	13.7228
Asn-Asp-Pro-Pro																																Peptide(tetra-)	441.187	13.7404
Ala-Leu-Ala-Gln																																Peptide(tetra-)	401.228	13.7454
dADP																																Nucleotide Metabolism	411.035	13.7581
Diacetylmonoxime																																0	101.048	13.7608
Allysine																																Amino Acid Metabolism	145.074	13.778
Methionyl-Arginine																																Peptides	305.152	13.8029
Glutathione																																Amino Acid Metabolism	307.083	13.8424
Cyclic ADP-ribose																																0	541.06	13.8448
NAD+																																Energy Metabolism	331.555	13.85
2-Deoxy-D-ribose 5-phosphate																																Carbohydrate Metabolism	214.024	13.8704
Picolinamide																																0	122.048	13.8756
Thiamin monophosphate																																Metabolism of Cofactors and Vitamins	344.071	13.8791
(S)-2-Amino-3-(3-hydroxy-4-oxo-4H-pyridin-1-yl)propanoate																																0	198.064	13.8813
Hydroxymethylphosphonate																																Amino Acid Metabolism	111.993	13.9125
N,N'-Dimethylurea																																Biosynthesis of Secondary Metabolites	88.0636	13.9364
gamma-L-Glutamyl-D-alanine																																Peptides	218.09	13.9418
Linamarin																																0	247.106	13.9426
Succinyladenosine																																0	383.107	13.9522
N-(1-Deoxy-1-fructosyl)proline																																Carbohydrate Metabolism	277.116	13.9558
(S)-AMPA																																0	186.064	13.9604
D-Glucono-1,5-lactone																																Carbohydrate Metabolism	178.048	13.9854
345.04																																	345.04	13.989
Lys-Val-Gly																																Peptide(tri-)	302.196	13.9903
843.172																																	843.172	14.0059
(1xi,3S)-1,2,3,4-Tetrahydro-1-methyl-beta-carboline-1,3-dicarboxylic acid																																Amino Acid Metabolism	274.095	14.0161
Gamma-Glutamylglutamine																																Peptides	275.112	14.0357
D-Phenylalanine																																Amino Acid Metabolism	165.079	14.0575
5-Guanidino-2-oxopentanoate																																Amino Acid Metabolism	173.08	14.0768
197.09																																	197.09	14.1113
dTDP																																Nucleotide Metabolism	402.023	14.12
D-Erythrose																																Carbohydrate Metabolism	120.042	14.1488
Coformycin																																0	284.112	14.1554
115.944																																	115.944	14.1717
(S)-2-Acetolactate																																Amino Acid Metabolism	132.042	14.1951
L-Glutamate																																Amino Acid Metabolism	147.053	14.2094
L-erythro-4-Hydroxyglutamate																																Amino Acid Metabolism	163.048	14.2842
Thiamin diphosphate																																Carbohydrate Metabolism	424.037	14.3313
Glu-Thr																																Peptide(di-)	248.101	14.3493
Sinalbin																																0	424.037	14.3495
404.156																																	404.156	14.3606
N-Gluconyl ethanolamine phosphate																																Carbohydrate Metabolism	319.067	14.361
166.026																																	166.026	14.3963
Met-Met																																Peptide(di-)	280.091	14.397
339.754																																	339.754	14.4171
L-Histidine																																Amino Acid Metabolism	155.069	14.4329
6-Hydroxyl-1,6-dihydropurine ribonucleoside																																0	270.096	14.4484
197.202																																	197.202	14.4523
197.09																																	197.09	14.4525
sn-glycero-3-Phosphocholine																																Lipid Metabolism	257.103	14.4529
trans-2-Hydroxycinnamate																																Amino Acid Metabolism	164.047	14.4546
3-(Uracil-1-yl)-L-alanine																																0	199.059	14.4658
sn-Glycerol 3-phosphate																																Lipid Metabolism	172.014	14.4899
2-Hydroxy-2,4-pentadienoate																																Amino Acid Metabolism	114.032	14.4924
D-Glucose																																Carbohydrate Metabolism	180.063	14.5165
352.077																																	352.077	14.5172
L-2-Aminoadipate																																Amino Acid Metabolism	161.069	14.5185
N6-Methyladenosine																																0	281.112	14.5237
(R)-Lactate																																Carbohydrate Metabolism	90.0315	14.5366
D-Ribose																																Carbohydrate Metabolism	150.053	14.5395
Pyruvate																																Carbohydrate Metabolism	88.0159	14.5424
(S)-1-Pyrroline-5-carboxylate																																Amino Acid Metabolism	113.048	14.5453
D-Ribulose 5-phosphate																																Carbohydrate Metabolism	230.019	14.5522
Diacetyl																																Carbohydrate Metabolism	86.0366	14.5682
L-Aspartate																																Amino Acid Metabolism	133.038	14.5799
269.111																																	269.111	14.5873
Succinate																																Carbohydrate Metabolism	118.027	14.5945
a Cysteine adduct																																Medium Contaminant	191.025	14.5959
D-Arabinono-1,4-lactone																																Carbohydrate Metabolism	148.037	14.5966
ADP																																Energy Metabolism	427.03	14.6047
2-Oxobutanoate																																Amino Acid Metabolism	102.032	14.6075
UMP																																Nucleotide Metabolism	324.036	14.6112
D-4'-Phosphopantothenate																																Metabolism of Cofactors and Vitamins	299.077	14.6161
UDP-N-acetyl-D-glucosamine																																Carbohydrate Metabolism	607.082	14.6192
N2-Acetyl-L-aminoadipate																																Amino Acid Metabolism	203.079	14.6199
1-(5'-Phosphoribosyl)-5-amino-4-imidazolecarboxamide																																Nucleotide Metabolism	338.063	14.6278
Choline phosphate																																Lipid Metabolism	183.066	14.633
L-Threonine																																Amino Acid Metabolism	119.058	14.6474
Pyridine-2,3-dicarboxylate																																Amino Acid Metabolism	167.022	14.6527
dihydrothymidine																																0	244.106	14.6542
5,6-Dihydrothymine																																Nucleotide Metabolism	128.058	14.674
p-nitrophenyl-&beta;-D-glucuronide																																0	314.051	14.7061
N-acetyl-(L)-arginine																																0	216.122	14.7085
231.023																																	231.023	14.7087
N-Acetyl-D-glucosamine 6-phosphate																																Amino Acid Metabolism	301.056	14.7267
5'-Phosphoribosyl-N-formylglycinamide																																Nucleotide Metabolism	314.052	14.7342
303.036																																	303.036	14.7392
3-Hydroxy-L-glutamate																																0	163.048	14.7422
Aminoimidazole ribotide																																Nucleotide Metabolism	295.057	14.7519
Glu-Ser																																Peptide(di-)	234.085	14.764
Pyridoxamine phosphate																																Metabolism of Cofactors and Vitamins	248.056	14.7744
nonulose 9-phosphate																																0	350.061	14.7799
Ala-Asp-Cys-Gly																																Peptide(tetra-)	364.105	14.7818
156.073																																	156.073	14.7937
N2-Acetyl-L-lysine																																Amino Acid Metabolism	188.116	14.8001
1-Deoxy-D-altro-heptulose 7-phosphate																																0	274.046	14.834
Glycerone phosphate																																Carbohydrate Metabolism	169.998	14.8484
L-Glutamine																																Amino Acid Metabolism	146.069	14.8576
Phosphonoacetate																																Amino Acid Metabolism	139.987	14.8634
Imidazol-4-ylacetate																																0	126.043	14.8758
P-DPD																																0	212.009	14.8789
Nicotinamide D-ribonucleotide																																Metabolism of Cofactors and Vitamins	334.057	14.8977
IMP																																Nucleotide Metabolism	348.047	14.9206
Glu-Ala-Ser																																Peptide(tri-)	305.122	14.9236
L-beta-aspartyl-L-alanine																																Peptides	204.075	14.9305
N-Formyl-L-aspartate																																Amino Acid Metabolism	161.033	14.9371
488.185																																	488.186	14.945
Ala-Asp-Gly-Ser																																Peptide(tetra-)	348.128	14.9559
glycerophosphoserine																																0	259.046	14.9601
4-Guanidinobutanoate																																Amino Acid Metabolism	145.085	14.9911
Aspartyl-L-proline																																Peptide(di-)	230.09	14.9921
L-alpha-Aspartyl-L-hydroxyproline																																0	246.085	14.9932
Glu-Arg																																Peptide(di-)	303.154	14.9945
Ala-Asp-Gly																																Peptide(tri-)	261.096	14.998
L-Cysteate																																Amino Acid Metabolism	169.004	15.0286
L-Asparagine																																Amino Acid Metabolism	132.053	15.0302
Ala-Ala-Asn																																Peptide(tri-)	274.128	15.0464
264.106																																	264.106	15.0497
CDP-choline																																Lipid Metabolism	488.108	15.0502
Thr-Ala-Pro																																Peptide(tri-)	287.148	15.0538
244.046																																	244.046	15.0601
D-Ribose 5-phosphate																																Carbohydrate Metabolism	230.019	15.0625
Lys-Pro																																Peptide(di-)	243.158	15.0684
D-Ribitol 5-phosphate																																Carbohydrate Metabolism	232.035	15.0686
Hydroxypyruvate																																Amino Acid Metabolism	104.011	15.0746
dATP																																Nucleotide Metabolism	491.001	15.0758
Pro-Arg																																Peptide(di-)	271.165	15.091
D-erythro-1-(Imidazol-4-yl)glycerol 3-phosphate																																Amino Acid Metabolism	238.035	15.1027
N-Acetylornithine																																Amino Acid Metabolism	174.1	15.1055
327.996																																	327.996	15.1163
278.04																																	278.04	15.1202
Ala-Cys-Ser																																Peptide(tri-)	279.089	15.1275
Pyridine N-oxide glucuronide																																Carbohydrate metabolism	272.077	15.1641
Glu-Ser																																Peptide(di-)	234.085	15.1863
4-Aminobutanoate																																Amino Acid Metabolism	103.063	15.1887
5-Aminopentanoate																																Amino Acid Metabolism	117.079	15.2022
Ile-Val-Val																																Peptide(tri-)	329.232	15.2415
175.954																																	175.954	15.2597
L-beta-aspartyl-L-serine																																Peptides	220.07	15.2899
121.074																																	121.074	15.3033
Acetone cyanohydrin																																0	85.0528	15.3081
Asn-Asp																																Peptide(di-)	247.08	15.3177
CMP																																Nucleotide Metabolism	323.052	15.3291
[FA methyl(4:1)] 2-methyl-2E-butenoic acid																																Lipids: Fatty Acyls	100.052	15.3338
N6-(L-1,3-Dicarboxypropyl)-L-lysine																																Amino Acid Metabolism	276.132	15.3385
Orthophosphate																																Energy Metabolism	97.9768	15.363
202.107																																	202.107	15.407
413.891																																	413.891	15.4205
363.093																																	363.093	15.4519
Ala-Phe-Asn-Arg																																Peptide(tetra-)	506.261	15.4542
dTTP																																Nucleotide Metabolism	481.989	15.4544
(S)-Malate																																Carbohydrate Metabolism	134.022	15.4571
O-Phospho-L-homoserine																																Amino Acid Metabolism	199.025	15.4863
Asp-Met-Asp-Gly																																Peptide(tetra-)	436.126	15.4876
sn-glycero-3-Phosphoethanolamine																																Lipid Metabolism	215.056	15.4918
Gln-Leu-Lys-Tyr																																Peptide(tetra-)	550.313	15.4959
L-Serine																																Amino Acid Metabolism	105.043	15.4983
N-Succinyl-L-glutamate																																Amino Acid Metabolism	247.069	15.509
Thienodihydropyridinium																																0	262.046	15.5127
365.072																																	365.072	15.5207
Tetraethylammonium																																0	129.152	15.5247
(R)-S-Lactoylglutathione																																Carbohydrate Metabolism	379.105	15.5251
339.754																																	339.754	15.5376
D-Fructose 6-phosphate																																Carbohydrate Metabolism	260.03	15.5409
433.864																																	433.864	15.545
115.944																																	115.944	15.5454
serinol phosphate																																0	171.03	15.5724
dCDP																																Nucleotide Metabolism	387.023	15.5802
5-Acetamidopentanoate																																Amino Acid Metabolism	159.09	15.5811
Thr-Arg																																Peptide(di-)	275.16	15.5817
588.229																																	588.229	15.5874
430.028																																	430.028	15.6032
238.062																																	238.062	15.6276
sn-glycero-3-Phospho-1-inositol																																0	334.067	15.6457
S-Succinylglutathione																																0	407.1	15.6505
113.121																																	113.12	15.6536
776.479																																	776.479	15.6589
Lys-Thr																																Peptide(di-)	247.153	15.6625
D-Ornaline																																0	262.116	15.6837
Thr-Thr-Ala																																Peptide(tri-)	291.143	15.6939
3-(Pyrazol-1-yl)-L-alanine																																0	155.069	15.7028
L-Citrulline																																Amino Acid Metabolism	175.096	15.7033
D-Sedoheptulose 7-phosphate																																Carbohydrate Metabolism	290.04	15.7101
5-L-Glutamylglycine																																0	204.075	15.7224
(2R,4S)-2,4-Diaminopentanoate																																Amino Acid Metabolism	132.09	15.7246
&alpha;-(2,6-anhydro-3-deoxy-D-arabino-heptulopyranosid)onate 7-phosphate																																0	272.03	15.7261
Erythrulose 1-phosphate																																Carbohydrate Metabolism	200.009	15.7301
826.084																																	826.084	15.7347
3,4-Dihydro-2H-Pyrrole-2-carboxylate																																0	113.048	15.7587
3-sulfopropanoate																																0	153.994	15.7692
Asn-Asn-Gly																																Peptide(tri-)	303.118	15.783
UDP-glucose																																Carbohydrate Metabolism	566.055	15.7987
483.109																																	483.109	15.8027
336.162																																	336.162	15.8092
alpha,alpha-Trehalose																																Carbohydrate Metabolism	342.116	15.8366
160.084																																	160.084	15.8547
338.09																																	338.09	15.8552
Lys-Gly-Pro																																Peptide(tri-)	300.18	15.8684
Gly-Pro-Arg																																Peptide(tri-)	328.186	15.8707
D-erythro-L-galacto-Nonulose																																Carbohydrate Metabolism	270.095	15.8721
ATP																																Energy Metabolism	506.996	15.8804
dGDP																																Nucleotide Metabolism	427.03	15.8857
Ala-Asp-Gly-Arg																																Peptide(tetra-)	417.197	15.8998
Brunfelsamidine																																0	109.064	15.9119
UDP																																Nucleotide Metabolism	404.002	15.9399
642.923																																	642.922	15.9566
CDP-ethanolamine																																Lipid Metabolism	446.061	15.9704
Ala-Asn-Asp-Arg																																Peptide(tetra-)	474.219	16.0195
346.041																																	346.041	16.0577
Asp-Gly-Arg																																Peptide(tri-)	346.16	16.0578
Ala-Lys-Asp-Gly																																Peptide(tetra-)	389.191	16.06
D-Ribose 1,5-bisphosphate																																Carbohydrate Metabolism	309.986	16.0614
Arginyl-Histidine																																Peptides	311.171	16.0632
Ala-Asp-Asp-Pro																																Peptide(tetra-)	416.153	16.0655
N-Carbamyl-L-glutamate																																Amino Acid Metabolism	190.059	16.0696
octulose 8-phosphate																																0	320.051	16.0704
2-Methyl-1-hydroxypropyl-ThPP																																Amino Acid Metabolism	496.094	16.0728
Arg-Gly-Gly-Gly																																Peptide(tetra-)	345.176	16.0767
342.033																																	342.033	16.0787
Lysyl-Histidine																																Peptides	283.164	16.0811
Gln-Arg																																Peptide(di-)	302.171	16.089
N4-Acetylcytidine																																0	285.096	16.1125
Arginyl-Threonine																																Peptides	275.159	16.1183
N-Carbamoyl-L-aspartate																																Nucleotide Metabolism	176.043	16.138
GMP																																Nucleotide Metabolism	363.058	16.1454
290.148																																	290.148	16.1463
8-Hydroxyadenine																																0	151.049	16.1507
6-diazo-5-oxonorleucine																																0	171.064	16.1525
Lys-Gln																																Peptide(di-)	274.164	16.1921
135.055																																	135.055	16.2019
Ala-Asp-Arg																																Peptide(tri-)	360.176	16.2208
beta-Alanyl-L-arginine																																Amino Acid Metabolism	245.149	16.2442
Lysyl-Threonine																																Peptides	247.153	16.2519
NADP+																																Energy Metabolism	371.538	16.2565
beta-Alanyl-L-lysine																																Amino Acid Metabolism	217.143	16.2594
gamma-Glutamyl-S-(1-propenyl)cysteine sulfoxide																																Peptides	306.088	16.2607
ADP ribose 1'',2''-phosphate																																0	310.514	16.2624
L-Azetidine 2-carboxylic acid																																0	101.048	16.2724
Phe-Asp-Asp																																Peptide(tri-)	395.133	16.2725
S-Adenosyl-L-methionine																																Amino Acid Metabolism	398.137	16.2758
Asp-Thr-Cys-Cys																																Peptide(tetra-)	440.104	16.2976
368.134																																	368.134	16.3035
N-Acetyl-D-glucosamine 1,6-bisphosphate																																0	381.023	16.316
2-Phosphoglycolate																																Carbohydrate Metabolism	155.982	16.3215
Asn-Arg																																Peptide(di-)	288.155	16.3317
Hexose phosphate																																Carbohydrate Metabolism	260.03	16.3362
341.976																																	341.976	16.3423
L-Glycericacid																																0	106.027	16.3433
3-Phospho-D-glycerate																																Carbohydrate Metabolism	185.993	16.3433
CDP-glucose																																Carbohydrate Metabolism	565.071	16.347
Digitalin																																0	712.366	16.3516
D-Histidine																																0	155.069	16.3994
N-(L-Arginino)succinate																																Amino Acid Metabolism	290.123	16.4064
Glu-Arg																																Peptide(di-)	303.154	16.4069
663.048																																	663.048	16.4127
Ser-Arg																																Peptide(di-)	261.144	16.4305
388.1																																	388.1	16.4346
Ala-Gln-Gln-Ser																																Peptide(tetra-)	432.197	16.4416
Lys-Asn																																Peptide(di-)	260.148	16.4421
CDP																																Nucleotide Metabolism	403.018	16.4622
297.063																																	297.064	16.4672
288.107																																	288.107	16.4824
611.14																																	611.14	16.4868
CoA-glutathione																																0	536.092	16.5089
Thr-Ala-Gly																																Peptide(tri-)	247.117	16.545
Epsilon-(gamma-Glutamyl)-lysine																																0	275.148	16.5456
Gammaglutamylornithine																																Peptides	261.132	16.5518
166.027																																	166.027	16.5522
Asp-Ser-Ser																																Peptide(tri-)	307.101	16.5544
Asp-Cys-Cys-Ser																																Peptide(tetra-)	426.088	16.5551
Lys-Ser																																Peptide(di-)	233.137	16.5593
Ala-Asn-Gln-Ser																																Peptide(tetra-)	418.181	16.5639
Ala-Gly-Arg																																Peptide(tri-)	302.17	16.5689
Asp-Cys-Cys-Ser																																Peptide(tetra-)	426.088	16.5724
439.109																																	439.109	16.5736
Lys-Gly																																Peptide(di-)	203.127	16.5922
nonulose 9-phosphate																																0	350.062	16.5926
Phe-Pro-Tyr																																Peptide(tri-)	425.194	16.609
alpha,alpha'-Trehalose 6-phosphate																																Carbohydrate Metabolism	422.083	16.6109
L-Homocitrulline																																0	189.111	16.6365
Ala-Thr-Asp-Cys																																Peptide(tetra-)	408.132	16.6477
Brunfelsamidine																																0	109.064	16.6544
692.19																																	692.19	16.6745
Glu-Glu																																Peptide(di-)	276.096	16.6869
Arginyl-Histidine																																Peptides	311.171	16.6881
346.095																																	346.095	16.6903
Aspartyl-Arginine																																Peptides	289.139	16.6905
Ser-Trp-Gly-Tyr																																Peptide(tetra-)	511.206	16.6978
Cystathionine																																Energy Metabolism	222.067	16.7174
Lys-Ala-Gly																																Peptide(tri-)	274.164	16.7222
Maclurin																																0	262.048	16.7264
Gly-Arg																																Peptide(di-)	231.133	16.7349
Cys-Glu-Glu-Glu																																Peptide(tetra-)	508.148	16.785
dCTP																																Nucleotide Metabolism	466.99	16.7917
Orotidine 5'-phosphate																																Nucleotide Metabolism	368.026	16.7937
D-Fructose																																Carbohydrate Metabolism	180.063	16.8017
224.994																																	224.994	16.8058
(S)-2-O-Sulfolactate																																0	169.988	16.8133
Glu-Asp																																Peptide(di-)	262.08	16.8256
385.052																																	385.052	16.827
L-beta-aspartyl-L-asparticacid																																Peptides	248.064	16.8459
Neuraminic acid																																0	267.096	16.8624
339.252																																	339.252	16.8672
390.05																																	390.05	16.8698
(R,R)-Tartaric acid																																Carbohydrate Metabolism	150.016	16.875
Ala-Asp-Cys-Ser																																Peptide(tetra-)	394.116	16.8839
542.332																																	542.332	16.8974
Phosphoenolpyruvate																																Carbohydrate Metabolism	167.982	16.9071
Cys-Arg																																Peptide(di-)	277.121	16.9184
202.045																																	202.045	16.92
Shikimate 3-phosphate																																Amino Acid Metabolism	254.019	16.9243
Glu-Arg-Cys																																Peptide(tri-)	203.082	16.9432
Phosphoenolpyruvate																																Carbohydrate Metabolism	167.982	16.9465
Arginyl-Serine																																Peptides	261.144	16.9466
N2-(D-1-Carboxyethyl)-L-lysine																																Amino Acid Metabolism	218.127	16.9595
dihomocitrate																																0	220.058	16.9615
Met-Ser																																Peptide(di-)	236.083	16.9686
Glutathione disulfide																																Amino Acid Metabolism	612.152	16.9689
Ala-Asp-Cys-Arg																																Peptide(tetra-)	231.593	16.971
D-Ribulose 1,5-bisphosphate																																Carbohydrate Metabolism	309.986	16.9912
Ala-Met-Trp-Asp																																Peptide(tetra-)	521.195	17.0005
294.143																																	294.143	17.0029
3-Deoxy-D-manno-octulosonate 8-phosphate																																Glycan Biosynthesis and Metabolism	318.035	17.0048
Raffinose																																Carbohydrate Metabolism	504.169	17.038
6-Phospho-D-gluconate																																Carbohydrate Metabolism	276.025	17.0456
Ala-Met-Ala-Ser																																Peptide(tetra-)	378.157	17.0616
265.95																																	265.95	17.0726
D-Glucono-1,5-lactone 6-phosphate																																Carbohydrate Metabolism	258.014	17.1163
906.055																																	906.055	17.126
324.135																																	324.135	17.1275
cis-Aconitate																																Carbohydrate Metabolism	174.016	17.1369
407.55																																	407.55	17.1463
115.944																																	115.944	17.151
500.995																																	500.995	17.1547
UTP																																Nucleotide Metabolism	483.969	17.1667
175.945																																	175.945	17.168
Sulfoacetate																																Amino Acid Metabolism	139.978	17.1731
N-dimethylethanolamine																																0	89.0841	17.2273
Ala-Met-Gly-Ser																																Peptide(tetra-)	364.142	17.2303
N-Gluconyl ethanolamine																																Lipids: Fatty Acyls	239.1	17.2571
Acetyl phosphate																																Amino Acid Metabolism	139.987	17.2624
Glutamyl-Cysteine																																Peptides	249.055	17.2683
Guanine																																Nucleotide Metabolism	151.049	17.2759
GDP																																Nucleotide Metabolism	443.024	17.309
D-myo-Inositol 1,2-cyclic phosphate																																0	242.019	17.3334
399.963																																	399.963	17.3352
3-Chloro-2-methylmaleylacetate																																0	205.998	17.3569
2-Methylcholine																																0	117.115	17.3618
N2-Fructopyranosylarginine																																Amino Acid Metabolism	336.164	17.3844
D-Fructose 1,6-bisphosphate																																Energy Metabolism	339.996	17.4082
305.075																																	305.075	17.4175
3-Phospho-D-glyceroyl phosphate																																Carbohydrate Metabolism	265.959	17.4216
Orthophosphate																																Energy Metabolism	97.9768	17.4675
2-Butyne-1,4-diol																																0	86.0366	17.4728
2-Hydroxy-2,4-pentadienoate																																Amino Acid Metabolism	114.032	17.4757
459.946																																	459.946	17.4828
232.007																																	232.007	17.5002
678.505																																	678.505	17.5054
Homoisocitrate																																Amino Acid Metabolism	206.043	17.5074
Citrate																																Carbohydrate Metabolism	192.027	17.5244
O-Acetylneuraminic acid																																0	309.106	17.5249
Streptobiosamine																																0	337.138	17.5339
Met-Cys-Cys																																Peptide(tri-)	355.069	17.5538
361.979																																	361.979	17.5771
296.001																																	296.001	17.6208
GDP-mannose																																Carbohydrate Metabolism	605.077	17.638
N6-(1,2-Dicarboxyethyl)-AMP																																Nucleotide Metabolism	463.074	17.6524
D-Sedoheptulose 1,7-bisphosphate																																Energy Metabolism	370.007	17.6593
CTP																																Nucleotide Metabolism	482.985	17.6648
Acetyl-maltose																																0	384.126	17.6712
643.029																																	643.028	17.689
97.9645																																	97.9645	17.7408
355.05																																	355.05	17.7734
526.152																																	526.152	17.7876
711.232																																	711.232	17.8106
400.017																																	400.017	17.8386
155.973																																	155.973	17.8453
Stachyose																																Carbohydrate Metabolism	666.222	17.8463
N3-hydroxyethylcytosine																																0	155.069	17.896
423.095																																	423.095	17.9163
Asp-Arg																																Peptide(di-)	289.139	18.0307
Asn-Asp-Pro-Ser																																Peptide(tetra-)	431.164	18.0776
beta-Maltose																																Carbohydrate Metabolism	342.116	18.086
(R)-2-Ethylmalate																																Carbohydrate Metabolism	162.053	18.086
Glu-Arg																																Peptide(di-)	303.154	18.0914
305.068																																	305.068	18.1116
364.098																																	364.098	18.1195
Norepinephrinesulfate																																0	249.031	18.1391
170.08																																	170.08	18.1413
Glu-Phe-Asp-Asp																																Peptide(tetra-)	524.176	18.1445
384.128																																	384.128	18.2039
3-Aminopropane-1,2-diol																																0	91.0633	18.248
Aspartylysine																																0	261.133	18.2521
423.157																																	423.157	18.3615
glutathione-sulfite																																0	387.041	18.4108
308.131																																	308.131	18.4762
374.643																																	374.643	18.4979
GTP																																Nucleotide Metabolism	522.991	18.5122
600.748																																	600.748	18.5261
Diethanolamine																																Lipid Metabolism	105.079	18.6593
Cellopentaose																																Carbohydrate Metabolism	828.275	18.7017
1-(5'-Phosphoribosyl)-5-amino-4-(N-succinocarboxamide)-imidazole																																Nucleotide Metabolism	454.073	18.7491
153.934																																	153.934	18.9867
584.136																																	584.136	19.0582
308.131																																	308.131	19.2116
Cellohexaose																																Carbohydrate Metabolism	990.328	19.225
422.149																																	422.149	19.2318
546.2																																	546.2	19.3374
153.934																																	153.934	19.4809
860.299																																	860.299	19.5075
859.804																																	859.805	19.6254
Ala-Gly-Ser																																Peptide(tri-)	233.101	19.8958
503.686																																	503.686	20.1863
N-Acetylcadaverine																																0	144.126	20.3838
(±)-Sulfobutanedioic acid																																0	197.983	20.4605
153.934																																	153.934	20.4716
Choline																																Amino Acid Metabolism	103.1	20.5266
738.244																																	738.243	20.5268
1-4-b-D-Mannan																																0	819.269	20.7419
560.198																																	560.198	20.7926
514.337																																	514.337	20.8416
H2S2O3																																0	113.945	20.8527
Maltoundecaose																																Carbohydrate metabolism	900.297	20.8747
339.252																																	339.252	20.8829
282.115																																	282.115	20.9006
339.754																																	339.754	20.9027
Thiamin																																Metabolism of Cofactors and Vitamins	264.104	20.9233
4-Amino-5-hydroxymethyl-2-methylpyrimidine																																Metabolism of Cofactors and Vitamins	139.074	20.9543
Maltododecaose																																Carbohydrate metabolism	981.323	20.9735
304.084																																	304.084	20.9759
N-Acetylputrescine																																Amino Acid Metabolism	130.111	20.9871
Trimetaphosphate																																Nucleotide Metabolism	239.899	21.1885
256.925																																	256.925	21.1899
339.252																																	339.252	21.2546
319.865																																	319.865	21.2834
469.363																																	469.363	21.2888
Ne,Ne dimethyllysine																																0	174.137	21.2918
Arg-OEt																																0	202.143	21.4195
gamma-L-Glutamylputrescine																																Amino Acid Metabolism	217.143	21.489
Thiamin																																Metabolism of Cofactors and Vitamins	264.104	21.6568
7,8-Diaminononanoate																																Metabolism of Cofactors and Vitamins	188.152	21.7252
163.121																																	163.121	21.7773
679.508																																	679.508	21.795
515.336																																	515.336	21.8181
612.41																																	612.41	21.8737
339.252																																	339.252	21.8887
&alpha;-(2,6-anhydro-3-deoxy-D-arabino-heptulopyranosid)onate 7-phosphate																																0	272.029	21.9051
210.029																																	210.029	21.9174
Ala-Ser																																Peptide(di-)	176.079	21.9821
490.183																																	490.183	21.9846
Lys-Lys																																Peptide(di-)	274.2	21.9874
Glu-Lys-Lys-Tyr																																Peptide(tetra-)	566.306	21.9924
202.216																																	202.216	21.9939
Glu-Ala-His-His																																Peptide(tetra-)	492.208	21.9974
L-Ornithine																																Amino Acid Metabolism	132.09	22.0171
195.086																																	195.086	22.0847
190.08																																	190.08	22.1586
Arginyl-Lysine																																Peptides	302.207	22.2426
N6-Methyl-L-lysine																																Amino Acid Metabolism	160.121	22.3187
&gamma;-aminobutyramide																																0	102.079	22.5276
Homoarginine																																Amino Acid Metabolism	188.127	22.602
Lys-Arg																																Peptide(di-)	302.207	22.6369
5-Aminopentanamide																																Amino Acid Metabolism	116.095	22.665
225.079																																	225.079	22.6728
95.9878																																	95.9878	22.7112
209.101																																	209.102	22.7113
204.096																																	204.096	22.7179
339.252																																	339.252	22.7439
339.754																																	339.754	22.7441
220.074																																	220.074	22.7443
meso-2,6-Diaminoheptanedioate																																Amino Acid Metabolism	190.095	22.8364
L-Lysine																																Amino Acid Metabolism	146.105	22.8503
208.067																																	208.068	22.8949
227.112																																	227.112	22.9433
224.095																																	224.095	23.0463
209.101																																	209.102	23.0654
165.106																																	165.106	23.1308
453.34																																	453.34	23.4141
nicotinamide riboside																																Nucleotide Metabolism	254.09	23.4262
5-Deoxy-5-aminoshikimic acid																																0	173.069	23.4555
230.069																																	230.069	23.534
214.092																																	214.092	23.5423
Ala-Asn-Gln-Pro																																Peptide(tetra-)	428.202	23.5641
196.093																																	196.093	23.607
339.252																																	339.252	23.6132
Arg-Lys-Asn-Gln																																Peptide(tetra-)	544.308	23.6981
L-Arginine																																Amino Acid Metabolism	174.112	23.7849
237.108																																	237.108	23.8404
453.34																																	453.34	23.8677
196.093																																	196.093	24.0225
339.754																																	339.754	24.1037
230.069																																	230.069	24.1132
218.076																																	218.076	24.1678
236.073																																	236.073	24.1856
181.966																																	181.966	26.9233
127.946																																	127.946	26.9254
395.858																																	395.858	26.928
101.993																																	101.993	26.9349
185.937																																	185.937	26.9428
373.85																																	373.85	26.9492
205.921																																	205.921	27.3915
143.92																																	143.92	27.3996
239.896																																	239.896	27.418
139.949																																	139.949	27.4367
233.862																																	233.862	27.4759
215.861																																	215.861	27.4949
151.913																																	151.913	27.6772
173.924																																	173.924	27.7471
157.947																																	157.947	27.7996
117.967																																	117.967	27.9068
101.972																																	101.972	27.9204
175.868																																	175.868	27.9601
140.983																																	140.983	28.0299
2-Aminomalonate semialdehyde																																0	103.027	28.0341
437.781																																	437.781	28.0387
194.874																																	194.874	28.0569
&beta;-cyano-L-alanine																																0	100.027	28.062
271.856																																	271.856	28.0855
176.871																																	176.871	28.1601
191.899																																	191.899	28.2291
275.824																																	275.824	28.2834
299.869																																	299.869	28.3169
177.866																																	177.866	28.4364
157.921																																	157.921	28.4606
116.983																																	116.983	28.4612
237.868																																	237.868	28.5499
95.9204																																	95.9204	28.5596
337.825																																	337.825	28.5771
119.965																																	119.965	28.6788
175.868																																	175.868	28.7154
140.983																																	140.983	28.763
428.233																																	428.233	28.8676
239.866																																	239.866	28.9217
337.825																																	337.825	28.973
191.855																																	191.855	28.9794
115.944																																	115.944	29.0162
175.868																																	175.868	29.0915
199.913																																	199.913	29.143
93.9223																																	93.9223	29.1867
142.981																																	142.981	29.2565
117.967																																	117.967	29.2656
214.122																																	214.122	29.2789
339.252																																	339.252	29.7453
175.868																																	175.868	29.768
127.912																																	127.912	29.8965
177.866																																	177.866	30.0607
117.967																																	117.967	30.2055
204.876																																	204.876	30.2956
437.781																																	437.781	30.369
237.868																																	237.868	30.3795
217.923																																	217.923	30.4456
155.923																																	155.923	30.4764
163.955																																	163.955	30.5144
337.825																																	337.825	30.5836
93.9223																																	93.9223	30.7235
117.967																																	117.967	30.7641
155.923																																	155.923	30.9518
161.957																																	161.957	31.0075
175.868																																	175.868	31.1483
237.868																																	237.868	31.1637
124.909																																	124.909	31.4839
217.923																																	217.923	31.4935
175.868																																	175.868	31.5588
239.866																																	239.866	31.5877
161.957																																	161.957	31.6425
177.866																																	177.866	31.6966
637.694																																	637.694	31.7833

## Sheet: allBasePeaks
Mass	RT	FORMULA	Isomers	Putative metabolite	confidence	Yeastcyc	DB	ppm	RT%err	altPPM	Groups	BP	mzdiff	relation.ship	addfrag	Cisotope %error	Related peaks	RSD:QC	maxRSD	max intensity	relation.id	TvsCTRL	Pvalue	Adduct	Polarity	Detections	cordycepinMC2_00_1	cordycepinMC2_00_3	cordycepinMC2_00_4	cordycepinMC2_00_5	cordycepinMC2_00_6	cordycepinMC2_00_2	cordycepinMC2_05_1	cordycepinMC2_05_3	cordycepinMC2_05_4	cordycepinMC2_05_2	cordycepinMC2_10_1	cordycepinMC2_10_3	cordycepinMC2_10_4	cordycepinMC2_10_5	cordycepinMC2_10_6	cordycepinMC2_10_2	cordycepinMC2_20_1	cordycepinMC2_20_3	cordycepinMC2_20_4	cordycepinMC2_20_5	cordycepinMC2_20_6	cordycepinMC2_20_2	cordycepinMC2_40_1
131.095	10.8356	C6H13NO2	16	L-Leucine	10	Yeastcyc	KEGG_Metacyc_HMDB	-0.299611	0.703055		cor-0'cor-5'cor-10'cor-20'cor-40'QC	L-Leucine	0	bp		-0.1	xACNx2-merx-FAxC13	0.09	0.23	2380000000	pos0	0		H	posneg	31	1820000000	2140000000	1770000000	1870000000	2080000000	2160000000	2380000000	1910000000	1330000000	2100000000	1460000000	2020000000	1890000000	1520000000	2010000000	1830000000	1950000000	1910000000	1600000000	1500000000	1670000000	2130000000	2010000000
149.051	11.3893	C5H11NO2S	6	L-Methionine	10	Yeastcyc	KEGG_Metacyc_HMDB	-0.166101	-0.181529		cor-0'cor-5'cor-10'cor-20'cor-40'QC	L-Methionine	0	bp		-0.2	xNa+x-FAx-FAxO18xS34x2-merx-NH3xC13	0.11	0.21	2160000000	pos1	0		H	pos	31	1650000000	1610000000	1480000000	1740000000	1620000000	2160000000	2140000000	1700000000	1280000000	1940000000	1360000000	1780000000	1800000000	1260000000	1850000000	1930000000	1660000000	1640000000	1470000000	1180000000	1460000000	2000000000	1940000000
155.069	14.4329	C6H9N3O2	6	L-Histidine	10	Yeastcyc	KEGG_Metacyc_HMDB	-0.234103	-0.736551		cor-0'cor-5'cor-10'cor-20'cor-40'QC	L-Histidine	0	bp		-0.2	x-FAxC13xNa+x2-merxC13xN15xO18x-CO2	0.07	0.17	2060000000	pos2	0		H	posneg	31	1690000000	1520000000	1480000000	1310000000	1400000000	1640000000	1670000000	1440000000	1230000000	1850000000	1320000000	1680000000	1700000000	1430000000	1450000000	1810000000	1460000000	1620000000	1580000000	1360000000	1480000000	1890000000	1740000000
146.069	14.8576	C5H10N2O3	7	L-Glutamine	10	Yeastcyc	KEGG_Metacyc_HMDB	-0.365105	-0.0164342		cor-0'cor-5'cor-10'cor-20'cor-40'QC	L-Glutamine	5.1e-06	bp		0.1	x-NH3x-FAxO18xN15x2-merxO18xN15xC13xNa+xK+	0.05	0.13	1740000000	pos3	0		H	posneg	31	1390000000	1420000000	1640000000	1440000000	1620000000	1740000000	1510000000	1370000000	1170000000	1600000000	1180000000	1510000000	1530000000	1360000000	1340000000	1620000000	1430000000	1420000000	1520000000	1240000000	1380000000	1620000000	1420000000
147.053	14.2094	C5H9NO4	15	L-Glutamate	10	Yeastcyc	KEGG_Metacyc_HMDB	-0.517584	0.491042		cor-0'cor-5'cor-10'cor-20'cor-40'QC	L-Glutamate	0	bp		0	x2-merxN15xO18xC13x-H2OxC13xNa+x-FA	0.05	0.16	1600000000	pos4	0		H	posneg	31	1340000000	1460000000	1340000000	1420000000	1540000000	1420000000	1600000000	1510000000	1090000000	1430000000	1440000000	1310000000	1600000000	1260000000	1560000000	1410000000	1230000000	1440000000	1200000000	1140000000	1360000000	1600000000	1230000000
115.063	12.6968	C5H9NO2	5	L-Proline	10	Yeastcyc	KEGG_Metacyc_HMDB	-0.0770397	-0.103997		cor-0'cor-5'cor-10'cor-20'cor-40'QC	L-Proline	0	bp		0	xN15xO18xNa+x2-merxC13	0.17	0.24	1130000000	pos5	0		H	pos	31	832000000	1070000000	1010000000	806000000	1090000000	1130000000	890000000	1030000000	577000000	1040000000	737000000	833000000	944000000	672000000	889000000	943000000	816000000	907000000	807000000	494000000	836000000	992000000	669000000
307.083	13.8424	C10H17N3O6S	3	Glutathione	8	Yeastcyc	KEGG_Metacyc_HMDB	-1.11015	-6.90364		cor-0'cor-5'cor-10'cor-20'cor-40'QC	Glutathione	0	bp		0.9	xNa+xC13x-H2Ox-NH3xS34x2-mer	0.14	0.18	925000000	pos6	0		H	posneg	31	646000000	661000000	623000000	809000000	776000000	881000000	635000000	717000000	575000000	790000000	606000000	702000000	894000000	542000000	752000000	774000000	712000000	632000000	893000000	615000000	789000000	756000000	753000000
174.112	23.7849	C6H14N4O2	2	L-Arginine	10	Yeastcyc	KEGG_Metacyc_HMDB	-0.302101	-0.189227		cor-0'cor-5'cor-10'cor-20'cor-40'QC	L-Arginine	0	bp		-0.5	x-H2Ox2-merxC13xC13x3-merxN15xO18x-NH3x-H2O	0.13	0.2	887000000	pos7	0		H	posneg	31	666000000	796000000	676000000	692000000	686000000	854000000	677000000	737000000	489000000	802000000	540000000	680000000	640000000	514000000	685000000	790000000	649000000	686000000	543000000	510000000	624000000	718000000	636000000
228.209	4.07866	C14H28O2	29	Tetradecanoic acid	7	0	KEGG_Metacyc_Lipidmaps_HMDB	-0.113272	-6.26493		cor-0'cor-5'cor-10'cor-20'cor-40'QC	Tetradecanoic acid	0	bp		0.2	xC13	0.24	0.61	755000000	neg1	0		H	neg	31	193000000	204000000	268000000	231000000	154000000	245000000	604000000	351000000	178000000	182000000	340000000	306000000	329000000	372000000	247000000	150000000	755000000	498000000	305000000	347000000	240000000	296000000	388000000
331.272	4.38058										cor-0'cor-5'cor-10'cor-20'cor-40'QC		0	bp		C18	xC13	0.16	0.61	752000000	pos10	0			pos	31	179000000	497000000	372000000	752000000	394000000	127000000	312000000	283000000	480000000	404000000	238000000	595000000	224000000	593000000	598000000	304000000	271000000	294000000	685000000	430000000	37900000	361000000	211000000
256.24	4.0447	C16H32O2	31	FA(16:0)	7	0	KEGG_Metacyc_Lipidmaps_HMDB	-0.0268502	-0.544966		cor-0'cor-5'cor-10'cor-20'cor-40'QC	FA(16:0)	0	bp		-0.6	xC13	0.36	0.61	646000000	neg3	0		H	neg	31	304000000	250000000	646000000	397000000	324000000	46400000	228000000	374000000	381000000	47800000	197000000	447000000	451000000	221000000	293000000	23300000	210000000	422000000	340000000	277000000	265000000	38400000	280000000
452.336	7.61492										cor-0'cor-5'cor-10'cor-20'cor-40'QC		0	bp		C25	x2+xNH3xC13	0.22	0.22	644000000	pos13	0			posneg	31	397000000	440000000	387000000	470000000	502000000	416000000	342000000	485000000	470000000	385000000	441000000	538000000	644000000	557000000	632000000	533000000	574000000	417000000	525000000	371000000	372000000	377000000	413000000
165.046	13.0888	C5H11NO3S	4	L-Methionine S-oxide	7	0	KEGG_Metacyc_HMDB	-0.287651	-2.86883		cor-0'cor-5'cor-10'cor-20'cor-40'QC	L-Methionine S-oxide	0	bp		-0.2	x2-merxS34xC13xO18x-NH3xK+	0.06	0.72	634000000	pos14	0		H	posneg	31	366000000	426000000	634000000	154000000	393000000	72200000	166000000	386000000	223000000	126000000	340000000	291000000	281000000	439000000	517000000	130000000	270000000	617000000	101000000	336000000	190000000	103000000	284000000
729.531	4.37709	C40H76NO8P	34	PC(32:2)	7	0	0	0.271421	8.61502		cor-0'cor-5'cor-10'cor-20'cor-40'QC	PC(32:2)	0	bp		-1.3	xC13	0.59	0.62	627000000	pos15	0		H	posneg	31	507000000	528000000	389000000	560000000	418000000	76800000	470000000	463000000	322000000	40500000	503000000	531000000	598000000	503000000	540000000	2.40707e+06	482000000	358000000	585000000	494000000	330000000	1122972	398000000
176.068	11.4435		0		0.2			-0.36753	#N/A		cor-0'cor-5'cor-10'cor-20'cor-40'QC	(2S)-2-Isopropylmalate	0	bp		-0.1	xO18xC13x-CO2xO18xC13	0.25	0.27	580000000	neg4	0		H	negneg	31	471000000	467000000	398000000	339000000	419000000	469000000	403000000	320000000	241000000	456000000	357000000	350000000	369000000	305000000	580000000	321000000	415000000	451000000	324000000	298000000	317000000	396000000	382000000
133.038	14.5799	C4H7NO4	4	L-Aspartate	10	Yeastcyc	KEGG_Metacyc_HMDB	0.254796	0.136402		cor-0'cor-5'cor-10'cor-20'cor-40'QC	L-Aspartate	0	bp		-0.1	xN15xC13xO18x2-merx-H2Ox-CO2x-NH3	0.05	0.26	568000000	neg6	0		H	negpos	31	438000000	388000000	399000000	334000000	366000000	396000000	452000000	411000000	250000000	476000000	373000000	388000000	431000000	312000000	461000000	394000000	321000000	394000000	354000000	318000000	358000000	395000000	438000000
117.079	12.3224	C5H11NO2	17	L-Valine	10	Yeastcyc	KEGG_Metacyc_HMDB	-0.301969	-0.545501		cor-0'cor-5'cor-10'cor-20'cor-40'QC	L-Valine	0	bp		0.1	xACNx2-merx2-merxN15xC13	0.11	0.17	564000000	pos16	0		H	posneg	31	367000000	445000000	418000000	371000000	388000000	564000000	412000000	423000000	392000000	449000000	322000000	453000000	517000000	415000000	532000000	488000000	440000000	358000000	371000000	353000000	372000000	475000000	433000000
175.084	11.0911	C7H13NO4	5	N-Carboxyethyl-g-aminobutyricacid	7	0	HMDB	-0.213729	-12.2572		cor-0'cor-5'cor-10'cor-20'cor-40'QC	N-Carboxyethyl-g-aminobutyricacid	0	bp		-0.1	xO18x-FAxC13xACN	0.3	0.3	500000000	pos17	0		H	posneg	31	220000000	283000000	287000000	306000000	299000000	258000000	220000000	299000000	184000000	281000000	160000000	261000000	299000000	162000000	331000000	228000000	247000000	270000000	256000000	190000000	290000000	312000000	305000000
103.063	15.1887	C4H9NO2	18	4-Aminobutanoate	10	Yeastcyc	KEGG_Metacyc_Lipidmaps_HMDB	-0.0962899	-0.986549		cor-0'cor-5'cor-10'cor-20'cor-40'QC	4-Aminobutanoate	0	bp		0.1	x-NH3xO18xC13xN15x-NH3	0.08	0.24	408000000	pos18	0		H	posneg	31	304000000	323000000	290000000	276000000	408000000	295000000	242000000	231000000	273000000	340000000	227000000	287000000	335000000	234000000	386000000	307000000	238000000	242000000	266000000	197000000	313000000	380000000	180000000
146.105	22.8503	C6H14N2O2	8	L-Lysine	10	Yeastcyc	KEGG_Metacyc_HMDB	-0.457231	0.00149854		cor-0'cor-5'cor-10'cor-20'cor-40'QC	L-Lysine	0	bp		-0.1	x-H2OxO18xK+x2-merx-FAxNa+xN15x-NH3xC13	0.09	0.24	399000000	pos19	0		H	posneg	31	259000000	291000000	383000000	256000000	318000000	312000000	338000000	317000000	187000000	328000000	284000000	310000000	324000000	250000000	385000000	347000000	262000000	304000000	227000000	227000000	292000000	399000000	231000000
132.09	22.0171	C5H12N2O2	6	L-Ornithine	10	Yeastcyc	KEGG_Metacyc_HMDB	-0.404552	-0.0132039		cor-0'cor-5'cor-10'cor-20'cor-40'QC	L-Ornithine	0	bp		0.2	xK+x-H2Ox-NH3xNa+xC13x2-merxO18xN15	0.06	0.26	385000000	pos21	0		H	posneg	31	256000000	290000000	296000000	223000000	294000000	337000000	309000000	309000000	180000000	348000000	234000000	256000000	255000000	247000000	385000000	317000000	229000000	265000000	223000000	218000000	294000000	352000000	258000000
264.104	20.9233	C12H16N4OS	1	Thiamin	8	Yeastcyc	medium_KEGG_Metacyc_HMDB	-1.05593	24.1435		cor-0'cor-5'cor-10'cor-20'cor-40'QC	Thiamin	0	bp		0.4	xS34x2+x2+xC13xS34xC13	0.14	0.3	369000000	pos22	0		H	pos	31	217000000	279000000	291000000	202000000	274000000	258000000	228000000	281000000	152000000	293000000	182000000	353000000	351000000	167000000	257000000	289000000	218000000	272000000	225000000	176000000	227000000	369000000	256000000
155.069	14.9394		0		0.2			0.016108	#N/A		cor-0'cor-5'cor-10'cor-20'cor-40'QC	L-Histidine	0	bp				0.15	0.19	330000000	pos23	0		H	posneg	31	193000000	230000000	240000000	254000000	257000000	330000000	197000000	200000000	194000000	128000000	163000000	264000000	248000000	224000000	255000000	265000000	237000000	271000000	240000000	217000000	212000000	266000000	242000000
503.317	3.81273							4.73187			cor-0'cor-5'cor-10'cor-20'cor-40'QC		0	bp		C30	x-NH3xC13	0.14	0.42	327000000	pos24	0			pos	31	163000000	195000000	194000000	321000000	152000000	132000000	274000000	249000000	160000000	105000000	298000000	162000000	158000000	169000000	240000000	73400000	251000000	164000000	206000000	188000000	275000000	57000000	249000000
165.079	10.1316	C9H11NO2	11	L-Phenylalanine	10	Yeastcyc	KEGG_Metacyc_HMDB	-0.304413	0.511745		cor-0'cor-5'cor-10'cor-20'cor-40'QC	L-Phenylalanine	0	bp		0.4	x-NH3x2-merxC13xNa+xNa+xK+x-FA	0.08	0.27	308000000	pos25	0		H	posneg	31	207000000	238000000	207000000	213000000	215000000	277000000	248000000	186000000	139000000	260000000	153000000	201000000	212000000	184000000	266000000	204000000	198000000	238000000	201000000	183000000	206000000	230000000	255000000
175.096	15.7033	C6H13N3O3	3	L-Citrulline	10	Yeastcyc	KEGG_Metacyc_HMDB	-0.157701	-0.0424187		cor-0'cor-5'cor-10'cor-20'cor-40'QC	L-Citrulline	0	bp		-0.1	x-FAxC13x-NH3xN15xO18	0.08	0.31	281000000	pos28	0		H	posneg	31	210000000	246000000	251000000	216000000	217000000	231000000	224000000	158000000	136000000	268000000	190000000	178000000	265000000	178000000	240000000	202000000	226000000	217000000	211000000	191000000	201000000	267000000	253000000
375.298	4.37813										cor-0'cor-5'cor-20'cor-40'QC		0	bp		C12	xC13xC13	0.53	0.82	275000000	pos29	0			pos	31	75900000	190000000	185000000	263000000	131000000	10600000	60100000	28800000	117000000	88100000	48900000	90500000	139000000	55600000	275000000	41500000	122000000	37600000	54200000	205000000	7620135	139000000	84900000
195.935	17.2528										cor-0'cor-5'cor-10'cor-20'cor-40'QC		0	bp			xK+xNa+xK+x2+xS34xO18x-H2O	0.06	0.56	261000000	neg9	0			neg	31	101000000	114000000	123000000	60500000	99600000	190000000	161000000	114000000	88800000	255000000	120000000	99500000	112000000	92100000	117000000	206000000	98700000	117000000	73100000	92400000	100000000	261000000	75200000
288.059	11.6288	C10H12N2O8	1	Orotidine	7	0	HMDB	-0.908888	-9.56484		cor-0'cor-5'cor-10'cor-20'cor-40'QC	Orotidine	0	bp		-0.2	xO18xO18x2-merx2-merxC13xK+xNa+	0.53	0.53	253000000	neg10	0		H	neg	31	113000000	98300000	153000000	94700000	87600000	139000000	113000000	117000000	110000000	126000000	99500000	92500000	122000000	96400000	112000000	135000000	95100000	110000000	112000000	80500000	74500000	143000000	116000000
251.102	8.08005	C10H13N5O3	4	Deoxyadenosine	7	0	KEGG_Metacyc_HMDB	-0.782548	-3.92336		cor-0'cor-5'cor-10'cor-20'cor-40'QC	Deoxyadenosine	0	bp		-0.9	xC13	0.06	0.74	249000000	pos32	0		H	posneg	31	95000000	76700000	71200000	47100000	73500000	210000000	98900000	77400000	41800000	233000000	61000000	75000000	83100000	51600000	103000000	206000000	59300000	102000000	52800000	79400000	77400000	249000000	52400000
715.515	4.09708	C39H74NO8P	28	PE(34:2)	7	0	0	0.325886	2.36954		cor-0'cor-5'cor-10'cor-20'cor-40'QC	PE(34:2)	0	bp		1.1	xC13xC13xK+	0.06	0.7	245000000	pos33	0		H	posneg	31	130000000	157000000	151000000	142000000	206000000	6.81605e+06	186000000	150000000	110000000	3.63436e+06	150000000	186000000	218000000	173000000	204000000	201369	142000000	187000000	177000000	153000000	148000000	184964	193000000
136.038	10.7336	C5H4N4O	3	allopurinol	7	0	KEGG_Metacyc_HMDB	-0.428614	-3.26949	3.0263	cor-0'cor-5'cor-10'cor-20'cor-40'QC	allopurinol	0	bp		-0.2	x-H2OxN15xC13xN15	0.13	0.22	232000000	pos34	0		H	pos	31	164000000	186000000	166000000	167000000	187000000	189000000	232000000	171000000	135000000	183000000	141000000	190000000	172000000	148000000	201000000	166000000	187000000	170000000	172000000	154000000	161000000	227000000	181000000
188.116	12.8156	C8H16N2O3	12	N6-Acetyl-L-lysine	7	0	KEGG_Metacyc_HMDB	-0.289279	14.9141		cor-0'cor-5'cor-10'cor-20'cor-40'QC	N6-Acetyl-L-lysine	0	bp		-0.9	x-FAxC13x2-merxNa+xK+xN15	0.06	0.3	230000000	pos35	0		H	pos	31	108000000	161000000	179000000	159000000	129000000	164000000	118000000	146000000	85300000	180000000	97000000	135000000	146000000	94100000	143000000	136000000	122000000	141000000	180000000	111000000	119000000	152000000	165000000
486.29	3.83117		0		3			-2.90072	#N/A	-3.27086	cor-0'cor-5'cor-10'cor-20'cor-40'QC	Ala-Leu-Gln-Arg	0	bp		9.2	xC13	0.2	0.55	218000000	neg12	0		H	neg	31	187000000	191000000	140000000	218000000	139000000	62400000	177000000	184000000	81600000	50200000	181000000	119000000	150000000	101000000	214000000	28300000	189000000	134000000	152000000	97600000	201000000	26100000	145000000
97.9768	15.363	H3O4P	1	Orthophosphate	7	0	KEGG_Metacyc_HMDB	-0.696398	-13.724		cor-0'cor-5'cor-10'cor-20'cor-40'QC	Orthophosphate	0	bp			x3-merx2-merxO18xNa+	0.04	0.18	199000000	neg13	0		H	neg	31	158000000	179000000	185000000	144000000	165000000	199000000	171000000	163000000	119000000	188000000	131000000	170000000	184000000	128000000	190000000	173000000	153000000	182000000	158000000	122000000	154000000	183000000	160000000
493.317	5.03916	C24H48NO7P	5	LysoPC(16:1)	7	0	KEGG_Lipidmaps_HMDB	0.186436	20.6217		cor-0'cor-5'cor-10'cor-20'cor-40	LysoPC(16:1)	0	bp		-0.7	xK+xC13xFA	0.67	0.67	192000000	pos37	0		H	pos	30	105000000	118000000	139000000	108000000	103000000	82300000	110000000	99300000	73100000	85400000	86100000	157000000	153000000	94600000	131000000	33800000	97100000	133000000	142000000	83400000	75400000	41500000	114000000
194.061	5.19433										cor-0'cor-5'cor-10'cor-20'cor-40'QC		0	bp		C9	xO18x2-merxC13xS34	0.5	0.5	182000000	neg14	0			neg	31	126000000	137000000	118000000	138000000	101000000	96200000	71800000	114000000	51800000	46000000	74000000	115000000	150000000	46100000	120000000	74400000	107000000	121000000	164000000	68700000	97200000	109000000	122000000
222.067	16.7174	C7H14N2O4S	6	Cystathionine	8	Yeastcyc	KEGG_Metacyc_HMDB	-0.86764	-10.4003		cor-0'cor-5'cor-10'cor-20'cor-40'QC	Cystathionine	0	bp		-0.2	x2-merxC13xS34xK+xNa+	0.03	0.16	175000000	pos38	0		H	posneg	31	122000000	139000000	158000000	132000000	139000000	158000000	139000000	126000000	126000000	175000000	117000000	139000000	154000000	116000000	146000000	146000000	139000000	141000000	139000000	128000000	135000000	159000000	135000000
287.246	4.42069	C16H33NO3	2	Lauroyl diethanolamide	7	0	HMDB	0.14071	1.51867		cor-0'cor-5'cor-10'cor-20'cor-40'QC	Lauroyl diethanolamide	0	bp		0.8	xC13	0.08	0.61	167000000	pos39	0		H	pos	31	46100000	32500000	31800000	34500000	60600000	92700000	72000000	91600000	53700000	81200000	110000000	56400000	80600000	146000000	25400000	60900000	115000000	105000000	157000000	46000000	71000000	45200000	110000000
264.104	21.6568	C12H16N4OS	1	Thiamin	8	Yeastcyc	medium_KEGG_Metacyc_HMDB	-0.172564	26.7126		cor-10'cor-20'cor-40'QC	Thiamin	0	bp				0.24	1.32	154000000	pos40	0		H	pos	31	11000000	13600000	22600000	69700000	9180923	20800000	16900000	13800000	8109432	113000000	84700000	86000000	77200000	44900000	108000000	154000000	26500000	31600000	60900000	11900000	25000000	32900000	10700000
398.137	16.2587		0		3			1.33704	#N/A	-0.370911	cor-0'cor-5'cor-10'cor-20'cor-40'QC	Deoxypodophyllotoxin	0	bp		-5.9	xC13xS34x2+	0.08	0.29	154000000	pos41	0		H	pos	31	121000000	152000000	99100000	118000000	128000000	138000000	154000000	125000000	72000000	138000000	113000000	110000000	115000000	98200000	142000000	127000000	102000000	113000000	114000000	105000000	112000000	132000000	120000000
339.996	17.4082	C6H14O12P2	14	D-Fructose 1,6-bisphosphate	10	Yeastcyc	KEGG_Metacyc_HMDB	-0.274725	-0.0677042		cor-0'cor-5'cor-10'cor-20'cor-40'QC	D-Fructose 1,6-bisphosphate	0	bp		0.5	x2+xO18xC13x2-mer	0.06	0.77	153000000	neg15	0		H	negpos	31	9262262	9334305	22000000	23900000	11400000	41000000	21000000	10600000	19200000	57700000	17300000	21200000	23300000	42200000	40700000	72900000	21700000	19100000	25900000	80400000	50400000	102000000	49200000
347.063	13.18	C10H14N5O7P	8	AMP	10	Yeastcyc	KEGG_Metacyc_HMDB	-0.441618	0.380812		cor-0'cor-5'cor-10'cor-20'cor-40'QC	AMP	0	bp		-0.4	xK+xNa+x2-merxC13xO18xC13xNa+	0.13	0.42	148000000	pos42	0		H	posneg	31	105000000	121000000	99300000	96500000	124000000	95100000	65200000	113000000	66300000	92500000	55900000	105000000	134000000	32400000	104000000	92900000	84700000	132000000	118000000	32700000	77100000	66100000	81500000
250.062	13.6188	C8H14N2O5S	2	gamma-L-Glutamyl-L-cysteine	8	Yeastcyc	KEGG_Metacyc_HMDB	-0.445542	-5.6784		cor-0'cor-5'cor-10'cor-20'cor-40'QC	gamma-L-Glutamyl-L-cysteine	0	bp		0.1	xNa+xK+x2-merxC13x-NH3	0.06	0.25	145000000	pos43	0		H	pos	31	90600000	102000000	80600000	111000000	92700000	85100000	91400000	91200000	78300000	97100000	60200000	84700000	107000000	57100000	92200000	102000000	80400000	82300000	125000000	63100000	106000000	99600000	101000000
135.054	9.52399	C5H5N5	1	Adenine	10	Yeastcyc	KEGG_Metacyc_HMDB	-0.121705	-0.167842		cor-0'cor-5'cor-10'cor-40'QC	Adenine	0	bp		-0.3	xN15xC13	0.14	0.85	120000000	pos45	0		H	posnegneg	31	68200000	98400000	114000000	9746494	91700000	20400000	34300000	69700000	24000000	21000000	97500000	27600000	25600000	112000000	100000000	28300000	65000000	56300000	8959641	120000000	31600000	12100000	47100000
566.055	15.7987	C15H24N2O17P2	4	UDP-glucose	10	Yeastcyc	KEGG_Metacyc_HMDB	0.0565016	-0.323541		cor-0'cor-5'cor-10'cor-20'cor-40'QC	UDP-glucose	0	bp		1	xNa+x2-merxC13xO18x2+	0.11	0.18	118000000	neg16	0		H	neg	31	73400000	78000000	88000000	82400000	85400000	70600000	81000000	70900000	75000000	101000000	67000000	79800000	100000000	76200000	93200000	109000000	77400000	94800000	95200000	74500000	73200000	103000000	92200000
339.252	14.6027				0.2						cor-5'cor-20		0	bp				0.24	0.24	116000000	pos47	0			pospospos	31	79300000	85700000	73800000	95000000	90500000	91300000	81100000	89400000	111000000	88500000	68600000	70400000	66900000	88000000	67700000	59400000	79800000	78700000	116000000	88300000	93200000	79300000	82300000
197.08	9.87638	C8H11N3O3	3	N-Acetyl-L-histidine	7	0	KEGG_Metacyc_HMDB	-0.112182	9.05849		cor-0'cor-5'cor-10'cor-20'cor-40'QC	N-Acetyl-L-histidine	0	bp		-0.3	xC13x-H2Ox-FA	0.09	0.27	114000000	pos48	0		H	pos	31	59200000	61000000	72700000	64100000	71400000	92200000	60700000	76700000	54000000	81300000	45000000	76200000	92300000	48600000	75200000	60900000	53400000	71600000	76200000	56100000	63100000	81700000	65900000
679.508	28.683				0.2						cor-0'cor-5'cor-10'cor-20'cor-40'QC		0	bp		C22	xC13xK+xK+xNa+	0.1	0.54	113000000	pos44	0			pos	31	62900000	80400000	70500000	103000000	99000000	73400000	93300000	90200000	86700000	59100000	85100000	77800000	86000000	99900000	71100000	60100000	102000000	64500000	113000000	60700000	17500000	73000000	74500000
122.04	7.81693	C4H10O2S	1	Thiodiglycol	7	0	HMDB	-0.114207	0.603759		cor-0'cor-5'cor-10'cor-20'cor-40'QC	Thiodiglycol	0	bp		-0.2	xO18xS34x-H2OxC13	0.04	0.22	108000000	pos52	0		H	pos	31	57300000	81200000	78800000	45300000	58400000	59500000	79600000	65600000	56300000	72700000	55500000	61800000	69900000	48200000	76400000	66300000	73400000	77000000	67200000	56600000	61000000	82900000	82500000
200.178	4.18285	C12H24O2	21	Dodecanoic acid	9	0	KEGG_Metacyc_Lipidmaps_HMDB	0.0427493	-0.170689		cor-0'cor-5'cor-10'cor-20'cor-40'QC	Dodecanoic acid	0	bp		0.8	xC13	0.31	0.51	107000000	neg18	0		H	neg	31	60500000	78000000	103000000	54300000	60200000	18700000	63400000	70600000	56300000	18000000	41000000	59000000	82100000	41300000	66500000	8507302	54400000	56500000	71800000	50300000	40400000	7.4758e+06	65200000
155.069	15.7028	C6H9N3O2	6	3-(Pyrazol-1-yl)-L-alanine	7	0	KEGG_Metacyc	0.0896234	22.671		cor-0'cor-5'cor-10'cor-20'cor-40'QC	3-(Pyrazol-1-yl)-L-alanine	0	bp		-0.3	xC13	0.07	0.18	106000000	pos54	0		H	pospospos	31	59500000	79500000	64200000	59600000	75000000	74000000	75600000	65700000	72300000	75200000	68100000	64800000	81400000	55200000	72700000	64100000	61400000	77600000	94600000	69600000	96300000	90500000	93300000
339.252	12.7006										cor-0'cor-5'cor-10'cor-20'cor-40'QC		0	bp				0.06	0.15	105000000	pos56	0			pos	31	67800000	81100000	78000000	92500000	81600000	81500000	73100000	80300000	89800000	92000000	69900000	75400000	85300000	74700000	69500000	82500000	76900000	76400000	105000000	68300000	79200000	84300000	75300000
403.199	4.48115										cor-0'cor-5'cor-10'cor-20'cor-40'QC		0	bp		C22	x-NH3xC13	0.09	0.59	103000000	pos58	0			pos	31	48900000	52700000	96300000	82400000	56200000	11900000	62000000	61200000	103000000	16100000	74300000	68600000	76200000	68900000	52900000	7.96824e+06	77100000	71400000	76100000	65500000	59300000	10200000	63800000
276.132	15.3385	C11H20N2O6	1	N6-(L-1,3-Dicarboxypropyl)-L-lysine	8	Yeastcyc	KEGG_Metacyc_HMDB	0.0805939	-11.254		cor-0'cor-5'cor-10'cor-20'cor-40'QC	N6-(L-1,3-Dicarboxypropyl)-L-lysine	0	bp		0.9	xNa+x-FAxC13x-H2O	0.06	0.21	100000000	pos59	0		H	pos	31	78200000	91600000	81100000	79700000	75400000	91900000	74400000	74700000	62100000	100000000	64900000	91600000	95400000	54700000	94700000	78700000	66300000	82000000	67600000	49600000	59600000	76600000	57400000
339.252	11.3107										cor-5		0	bp			x2-merx2-mer	0.05	0.15	96900000	pos62	0			pospos	31	69700000	66200000	61700000	94000000	79400000	77100000	89100000	77300000	79800000	78500000	64300000	77700000	80200000	70900000	75200000	81900000	72600000	68200000	84500000	65500000	96900000	78700000	71100000
156.017	9.68283	C5H4N2O4	2	Orotate	10	Yeastcyc	KEGG_Metacyc_HMDB	0.154566	1.49717		cor-0'cor-5'cor-10'cor-20'cor-40'QC	Orotate	0	bp		0.2	xK+xNa+x2-merxC13xN15xO18x-CO2x-CO2	0.15	0.44	96800000	neg23	0		H	neg	31	42600000	70000000	96800000	55700000	29500000	41000000	60000000	70400000	66900000	60900000	39700000	59900000	78500000	34900000	47000000	59400000	48200000	65900000	92600000	34700000	31900000	67100000	62700000
172.146	4.31186	C10H20O2	48	Decanoic acid	9	0	KEGG_Metacyc_Lipidmaps_HMDB	0.155969	0.2757		cor-0'cor-5'cor-10'cor-20'cor-40'QC	Decanoic acid	0	bp		-0.3	xC13	0.43	0.56	95100000	neg24	0		H	neg	31	30600000	47400000	58200000	30800000	47300000	14400000	31000000	35500000	21400000	16800000	23100000	35400000	60400000	27500000	55500000	8882808	33000000	49900000	53200000	29600000	26100000	9647887	51300000
192.027	17.5244	C6H8O7	13	Citrate	10	Yeastcyc	KEGG_Metacyc_HMDB	-0.0716525	0.599035		cor-0'cor-5'cor-10'cor-20'cor-40'QC	Citrate	0	bp		0.2	x-H2Ox-FAx2+xO18xC13xNa+	0.05	0.23	93500000	neg25	0		H	neg	31	56800000	55500000	52900000	65500000	61900000	51600000	61400000	45400000	35000000	47300000	65900000	69100000	51900000	68100000	91800000	48400000	54000000	61000000	65700000	60700000	64700000	48300000	70900000
339.252	15.5199				0.2						cor-40		0	bp				0.1	0.19	93300000	pos65	0			pospos	31	57300000	70300000	69100000	68400000	65900000	70300000	62200000	61300000	90900000	78800000	63600000	75200000	80800000	68100000	64700000	75800000	68800000	66200000	93300000	73400000	75100000	71200000	69800000
469.363	7.86234				0.2						cor-0'cor-40		0	bp				1.14	1.14	93200000	pos66	0			pos	31	16900000	18000000	23200000	21600000	15000000	10000000	12300000	29200000	93200000	11200000	21000000	23000000	29100000	57900000	15000000	6.22595e+06	6800150	6207491	6730832	6.16961e+06	23900000	6.72136e+06	57200000
88.0159	7.88876		0		0.4			-1.70575	#N/A		cor-0'cor-5'cor-10'cor-20'cor-40	Pyruvate	0	bp		0.7	xC13	1.2	1.2	92800000	neg26	0		H	neg	31	11100000	13900000	13700000	12000000	11900000	14800000	12400000	12600000	8476630	15500000	10100000	11800000	13900000	9941178	14800000	12800000	11200000	13100000	13000000	11500000	13200000	15500000	13400000
339.252	20.8829										cor-10		0	bp			x3+	0.17	0.23	92800000	pos67	0			pos	31	65000000	71400000	75700000	56700000	82200000	73000000	64100000	80700000	63600000	57600000	69000000	92800000	90100000	75700000	81300000	71100000	66700000	69600000	87100000	62100000	79000000	81400000	39900000
339.252	21.2546										cor-5'cor-10'cor-20		0	bp				0.19	0.3	92800000	pos68	0			pos	31	54700000	68800000	66700000	48600000	63900000	43800000	70500000	59100000	57200000	54200000	61000000	92800000	78900000	71800000	79400000	71100000	70700000	69600000	81200000	65200000	77400000	81400000	66800000
716.46	28.5866				0.1			-3.68931			cor-0'cor-5'cor-10'cor-20'cor-40'QC		0	bp	xK+	C37	x2+xC13xC13xC13x2+	0.16	0.31	91900000	pos69	0			pos	31	60800000	57800000	51700000	51100000	62200000	45400000	65400000	66300000	32600000	45100000	43200000	53400000	74600000	58300000	53100000	73400000	60700000	61700000	68900000	58100000	42600000	91900000	43400000
761.52	3.93195	C40H76NO10P	20	PS(34:1)	7	0	0	-1.14881	-1.73081		cor-0'cor-5'cor-10'cor-20'cor-40'QC	PS(34:1)	0	bp		-1.3	x2+xC13	0.29	0.63	82400000	neg28	0		H	neg	31	53500000	76300000	58200000	58600000	72200000	6423783	57900000	57200000	40900000	3896444	62200000	62300000	58700000	66400000	64300000	99311.8	58700000	62800000	68500000	44500000	49200000	68841.8	75800000
339.252	16.8672										cor-20'QC		0	bp				0.1	0.1	80900000	pos73	0			pos	31	60200000	70500000	63400000	65200000	74300000	72000000	69700000	62400000	72500000	62400000	56100000	66000000	68000000	68300000	70000000	62300000	69400000	69500000	79400000	71200000	74000000	69100000	70900000
155.069	16.3994	C6H9N3O2	6	3-(Pyrazol-1-yl)-L-alanine	7	0	KEGG_Metacyc	0.0580247	25.9557		cor-0'cor-5'cor-10'cor-20'cor-40'QC	3-(Pyrazol-1-yl)-L-alanine	0	bp				0.13	0.18	75600000	pos74	0		H	pos	31	40800000	48800000	59600000	38700000	46100000	43900000	46500000	40300000	39300000	47700000	39800000	54700000	66600000	45900000	57300000	60300000	46900000	55100000	57200000	47600000	52600000	71400000	64200000
105.043	15.4983	C3H7NO3	4	L-Serine	10	Yeastcyc	KEGG_Metacyc_HMDB	0.0956469	0.0538872		cor-0'cor-5'cor-10'cor-20'cor-40'QC	L-Serine	0	bp		0.3	xC13xO18x-H2OxN15xCl	0.06	0.16	71800000	pos75	0		H	pos	31	65000000	65800000	60900000	71800000	59400000	66000000	59200000	66400000	45300000	64600000	60900000	56400000	66900000	48100000	69800000	61000000	58200000	58900000	65400000	52900000	58200000	65800000	55600000
121.074	15.3033		0		4.5			0.1589	#N/A		cor-0'cor-10'cor-20'QC	Tromethamine	0	bp		0.2	xC13xC13	0.24	0.88	68100000	pos76	0		H	posneg	31	16300000	15800000	18000000	23500000	25400000	12500000	10100000	17300000	59100000	16600000	16900000	20700000	17300000	12100000	17200000	23000000	17100000	17900000	31700000	17700000	22700000	11700000	15200000
384.121	13.388	C21H20O7	26	Anthocyanin 3'-O-beta-D-glucoside	7	0	KEGG	1.45281	48.0216	-0.317468	cor-0'cor-5'cor-10'cor-20'cor-40'QC	Anthocyanin 3'-O-beta-D-glucoside	0	bp		-6	x2+x2+xS34xNa+xC13	0.1	0.21	67400000	pos77	0		H	pos	31	55100000	64800000	60400000	51900000	51500000	61200000	49600000	55200000	34700000	51700000	36500000	52700000	49100000	34300000	57600000	57800000	37900000	54900000	51400000	35000000	43500000	48200000	55600000
156.053	10.6221	C6H8N2O3	4	4-Imidazolone-5-propanoate	7	0	KEGG_Metacyc_HMDB	-0.17362	7.06163		cor-0'cor-5'cor-10'cor-20'cor-40'QC	4-Imidazolone-5-propanoate	0	bp		0.1	xC13x-FA	0.48	0.48	67000000	pos78	0		H	posneg	31	26100000	33100000	43000000	30200000	28300000	41000000	29100000	26100000	24700000	42800000	23300000	31000000	41700000	25400000	36100000	41200000	31000000	39000000	43600000	23300000	32000000	52900000	36500000
197.09	14.1113										cor-0'cor-5'cor-10'cor-20'cor-40'QC		0	bp		C6	xC13x-H2O	0.63	0.67	66300000	pos79	0			pos	31	22700000	23900000	13500000	21700000	19600000	34100000	31700000	21500000	16100000	66300000	21500000	23900000	23500000	20300000	20400000	61300000	21000000	30800000	22800000	28400000	20900000	62500000	16000000
129.043	13.6259	C5H7NO3	8	L-1-Pyrroline-3-hydroxy-5-carboxylate	8	Yeastcyc	KEGG_Metacyc_HMDB	0.0542018	20.481		cor-5'cor-10'cor-40'QC	L-1-Pyrroline-3-hydroxy-5-carboxylate	0	bp				0.07	1.07	65300000	pos80	0		H	pos	31	9820399	10900000	9986870	9805006	9297838	56500000	10300000	9529788	6171912	9019180	20000000	9567269	9813962	15400000	11900000	8551584	16200000	21700000	11800000	10800000	14200000	65300000	7735567
255.074	13.006	C11H13NO6	1	Nicotinate D-ribonucleoside	8	Yeastcyc	KEGG_Metacyc_HMDB	-0.437368	-27.1542		cor-0'cor-5'cor-10'cor-20'cor-40'QC	Nicotinate D-ribonucleoside	0	bp		-0.3	xO18xC13	0.08	0.27	65200000	pos81	0		H	pos	31	37100000	48500000	38000000	37700000	32000000	47200000	33900000	37400000	22700000	45000000	27500000	35700000	41000000	25200000	38800000	36100000	32600000	37200000	42300000	28500000	30800000	35500000	41600000
339.252	21.8887										cor-0		0	bp				0.19	0.33	64600000	pos82	0			pospos	31	49900000	48300000	58100000	51800000	53600000	54700000	60600000	48500000	48200000	45700000	42300000	49900000	51300000	59600000	57700000	52100000	43900000	39200000	37800000	51800000	51500000	46000000	49800000
506.996	15.8804	C10H16N5O13P3	5	ATP	10	Yeastcyc	KEGG_Metacyc_HMDB	0.224166	-0.123501		cor-0'cor-5'cor-10'cor-20'cor-40'QC	ATP	0	bp		1.5	xO18x2+xC13	0.09	0.53	63900000	neg31	0		H	negpos	31	17400000	13500000	17700000	22900000	15000000	30900000	39500000	16900000	19700000	43900000	26600000	20700000	13500000	27700000	35100000	33100000	22700000	19200000	15800000	37700000	29700000	44400000	27100000
267.097	9.11444	C10H13N5O4	4	Adenosine	10	Yeastcyc	KEGG_Metacyc_HMDB	-0.126062	-0.279691		cor-0'cor-5'cor-10'cor-20'cor-40'QC	Adenosine	0	bp		-0.3	xO18xC13	0.06	0.49	63800000	pos84	0		H	posneg	31	42900000	63800000	26700000	15000000	46100000	42300000	39700000	39700000	14000000	48400000	31200000	53300000	41400000	34700000	51400000	38300000	28600000	51600000	21300000	29200000	18500000	13800000	27900000
337.334	4.38741				0.2						cor-0'cor-5'cor-10'QC		-2e-05	bp		C24	xC13xNH3	0.63	1.23	63700000	pos85	0			posneg	31	6665563	6.39813e+06	3.92542e+06	3.51841e+06	10900000	3959010	15900000	5.11955e+06	6.66037e+06	4.13832e+06	1998668	1.13146e+06	1.40751e+06	5009665	2.18924e+06	1.88494e+06	9213490	30300000	6868958	4.3213e+06	63700000	2147900	23700000
197.09	14.4525										cor-0'cor-5'cor-10'cor-20'cor-40'QC		0	bp				0.17	0.78	62500000	pos86	0			pos	31	22700000	14100000	14100000	11200000	13900000	34100000	17100000	17700000	11900000	54700000	2977608	18100000	12000000	12200000	17500000	37300000	20700000	15800000	17100000	20400000	42100000	62500000	16800000
158.069	12.0545	C6H10N2O3	3	4-Methylene-L-glutamine	7	0	KEGG_Metacyc	0.0496802	-9.8295		cor-0'cor-5'cor-10'cor-20'cor-40'QC	4-Methylene-L-glutamine	0	bp		0.2	xN15xC13xO18x-H2O	0.08	0.26	61800000	pos87	0		H	pos	31	38900000	61800000	43500000	47500000	43100000	57600000	50400000	46700000	26300000	46800000	32700000	44300000	42200000	29700000	60700000	44200000	40500000	46600000	39000000	38300000	47500000	45600000	44300000
197.08	9.62209		0		0.2			0.0633808	#N/A		cor-0'cor-5'cor-10'cor-20'cor-40	N-Acetyl-L-histidine	0	bp				0.94	0.94	59900000	pos89	0		H	pospos	31	17300000	22200000	21100000	20300000	19100000	17200000	17500000	19000000	9562857	24500000	11500000	19300000	24000000	9859086	23000000	20600000	16700000	23500000	20700000	12000000	18200000	27200000	17000000
221.108	9.29105	C9H19NO3S	1	CAPS	7	0	0	-0.715118	20.2788		cor-0'cor-5'cor-10'cor-20'cor-40'QC	CAPS	0	bp		0.1	xK+xC13xNa+xS34xS34x2-mer	0.08	0.2	59100000	pos90	0		H	posneg	31	51700000	51100000	46300000	53800000	48800000	42000000	59100000	58800000	54800000	36900000	48500000	55000000	45800000	51800000	50600000	39000000	49200000	44100000	53500000	52400000	53100000	42200000	54300000
552.2	20.1765										QC		0	bp		C18	x2-merxNa+xC13xC13xCl	0.14	1.77	58500000	pos92	0			pos	31	3.23746e+06	3915624	5007337	915308	2004990	50000000	25800000	9496898	2.42052e+06	58500000	3.97446e+06	5.38012e+06	2527384	3.63238e+06	11400000	43300000	2.40088e+06	11300000	1.52029e+06	2.5655e+06	6300388	42500000	1762419
268.153	7.97648	C12H20N4O3	5	His-Leu	7	0	KEGG_Peptides_HMDB	-0.330873	-27.0744		cor-0'cor-5'cor-10'cor-20'cor-40'QC	His-Leu	0	bp		-1.1	xC13	0.17	0.25	55800000	pos94	0		H	posneg	31	39800000	42600000	44000000	38400000	36500000	36500000	31700000	42800000	23400000	30500000	33600000	37400000	45000000	26600000	45400000	29000000	36500000	37900000	37300000	29100000	28400000	31500000	40000000
180.063	14.5165	C6H12O6	53	D-Glucose	8	Yeastcyc	KEGG_Metacyc_HMDB	-0.096959	9.43052		cor-0'cor-5'cor-10'cor-20'cor-40'QC	D-Glucose	0	bp		0.1	x-H2OxC13xClxO18	0.04	0.79	55300000	neg38	0		H	neg	31	15400000	13000000	12800000	8780472	11400000	37100000	25300000	15200000	7234598	52800000	13600000	13400000	12100000	10700000	17600000	48100000	13000000	19300000	9974783	18100000	17400000	55300000	6.99461e+06
147.035	13.238	C5H9NO2S	1	Thiomorpholine 3-carboxylate	7	0	KEGG_Metacyc_HMDB	0.603764	3.73292		cor-0'cor-10'QC	Thiomorpholine 3-carboxylate	0	bp		-0.1	xS34xC13	0.16	1.43	55000000	pos97	0		H	pos	31	6621231	9820688	20600000	6265010	7.58352e+06	1.35688e+06	4.03353e+06	6051676	23600000	1.57147e+06	10300000	5762617	5.24869e+06	19000000	8612522	1628009	6601706	55000000	2.71173e+06	16600000	2.67084e+06	3.02102e+06	37700000
297.09	7.68455	C11H15N5O3S	2	5'-Methylthioadenosine	10	Yeastcyc	KEGG_Metacyc_HMDB	-0.148376	-4.06309		cor-0'cor-5'cor-10'cor-20'cor-40'QC	5'-Methylthioadenosine	0	bp		1.1	xC13	0.32	0.32	53000000	pos99	0		H	pos	31	42500000	44500000	39800000	45700000	45300000	38800000	43300000	44000000	32000000	45600000	26900000	47500000	38700000	35500000	53000000	45600000	36100000	43400000	50300000	27300000	38400000	39100000	39200000
136.053	5.15625	C8H8O2	23	4-Hydroxyphenylacetaldehyde	7	0	KEGG_Metacyc_HMDB	0.711939	-26.6868		cor-0'cor-5'cor-10'cor-20'cor-40'QC	4-Hydroxyphenylacetaldehyde	0	bp		0.3	xC13	0.58	0.58	53000000	neg41	0		H	negneg	31	17400000	17600000	51500000	36600000	18800000	13000000	16500000	16700000	34100000	13000000	16400000	28100000	33800000	15900000	16700000	11400000	17400000	28800000	25800000	16100000	18900000	25500000	18000000
156.073	14.7937										cor-0'cor-5'cor-10'cor-20'cor-40'QC		0	bp				0.1	0.58	50800000	pos103	0			pos	31	25700000	33600000	43600000	39100000	34800000	31700000	13700000	12900000	30900000	9218095	8515637	28600000	12800000	13500000	19800000	21600000	28200000	33400000	37000000	38700000	50800000	40100000	35100000
273.18	13.4882	C11H23N5O3	3	Val-Arg	7	0	Peptides	-0.0144849	-9.86264		cor-0'cor-5'cor-10'cor-20'cor-40'QC	Val-Arg	0	bp		-0.5	x2+xC13	0.1	0.4	50500000	pos105	0		H	pos	31	30800000	38300000	40300000	35700000	33600000	42800000	46100000	34600000	14700000	41600000	31400000	35300000	42100000	25900000	40700000	39600000	31900000	37700000	50500000	26100000	37300000	37000000	39100000
339.754	15.5376										cor-40		0	bp				0.15	0.27	50200000	pos108	0			pospos	31	28500000	33400000	33400000	37300000	31200000	28400000	26700000	24500000	28200000	34400000	26100000	42800000	30700000	29200000	29300000	31400000	24700000	26900000	50200000	31200000	31900000	35800000	37000000
339.754	14.9445				0.2						cor-5'cor-20'cor-40'QC		0	bp				0.06	0.16	50200000	pos106	0			pospos	31	27700000	26600000	32600000	28000000	30500000	40100000	36800000	37200000	44900000	37700000	27100000	37400000	32000000	28200000	35100000	38100000	38100000	35000000	50200000	36700000	40800000	35800000	37000000
572.296	4.54821	C25H49O12P	1	[PI(16:0)] 1-hexadecanoyl-sn-glycero-3-phospho-(1'-myo-inositol)	7	0	Lipidmaps	0.190958	12.0532		cor-0'cor-5'cor-10'cor-20'cor-40	[PI(16:0)] 1-hexadecanoyl-sn-glycero-3-phospho-(1'-myo-inositol)	0	bp		0.1	xC13	0.74	0.74	49500000	neg44	0		H	negpos	30	17200000	16300000	18200000	14000000	15500000	49500000	24400000	13200000	15200000	38500000	13900000	12900000	18100000	12200000	24200000	22500000	12100000	14200000	14700000	10500000	12400000	17400000	12800000
177.064	12.6441	C6H11NO5	1	4-Hydroxy-4-methylglutamate	7	0	KEGG	-0.0628326	-40.7706		cor-0'cor-5'cor-10'cor-20'cor-40'QC	4-Hydroxy-4-methylglutamate	0	bp		-0.1	xK+xNa+x2-merxO18xN15xC13x-H2O	0.12	0.3	48900000	neg45	0		H	neg	31	33700000	34300000	36000000	38200000	40200000	40700000	30700000	29300000	21500000	36200000	24100000	28600000	36600000	22600000	48900000	31500000	28200000	31500000	31500000	25800000	32600000	36000000	28900000
548.291	3.90389				0.2						cor-0'cor-10'cor-20'cor-40'QC		0	bp		C36	xC13	0.6	1.27	48600000	neg46	0			neg	31	19200000	22100000	29000000	32600000	17100000	9471859	6.50793e+06	45100000	4469391	6.22289e+06	27600000	19300000	25900000	23100000	25400000	2.20611e+06	21900000	16200000	29600000	15100000	48600000	1.40739e+06	22900000
339.252	29.7453										cor-20		0	bp				0.19	0.23	47400000	pos109	0			pos	31	25600000	26800000	31900000	30000000	33300000	42400000	36200000	30100000	31700000	39300000	38200000	41400000	32400000	33900000	30900000	35000000	45400000	38100000	42300000	46200000	45600000	39500000	27400000
123.032	7.72634	C6H5NO2	5	Nicotinate	10	Yeastcyc	KEGG_Metacyc_HMDB	0.0772524	-3.29985		cor-0'cor-5'cor-10'cor-20'cor-40'QC	Nicotinate	0	bp				0.44	0.44	46900000	pos110	0		H	pos	31	11300000	12500000	23200000	21000000	18500000	20300000	15500000	11600000	10400000	23700000	12600000	16400000	23100000	10200000	24100000	29700000	15700000	13300000	23000000	14200000	17900000	31600000	27000000
308.087	13.9447				0.2						cor-0'cor-5'cor-10'cor-20'cor-40'QC		0	bp	xC13		x2+	0.07	0.48	46400000	neg47	0			neg	31	28100000	41200000	32000000	37900000	36600000	38800000	44500000	33800000	22000000	46400000	25000000	35900000	38400000	24000000	41800000	34200000	29800000	29600000	32300000	24000000	1.46035e+06	33900000	38000000
119.058	14.6474	C4H9NO3	11	L-Threonine	10	Yeastcyc	KEGG_Metacyc_HMDB	0.212743	3.2963		cor-0'cor-5'cor-10'cor-20'cor-40'QC	L-Threonine	0	bp				0.35	0.35	46100000	pos112	0		H	posneg	31	30100000	28700000	35100000	29600000	31900000	30000000	37000000	46100000	34600000	39000000	28800000	30200000	35400000	27500000	37900000	33700000	32600000	33200000	35100000	27700000	36600000	32200000	40600000
175.868	27.9601										cor-0'cor-5'cor-10'cor-20'cor-40'QC		0	bp				0.05	0.45	45600000	pos114	0			pos	31	19500000	24000000	27600000	17700000	21600000	34100000	24900000	22500000	12900000	39900000	16300000	21300000	27100000	15200000	30300000	39200000	19300000	24200000	20900000	14400000	16000000	40000000	22600000
493.317	7.66903	C24H48NO7P	5	LysoPC(16:1)	7	0	KEGG_Lipidmaps_HMDB	0.0471742	47.8422		cor-0'cor-5'cor-10'cor-20'cor-40'QC	LysoPC(16:1)	0	bp		2.1	xC13	0.11	0.54	45100000	pos115	0		H	pos	31	26300000	33000000	32400000	21300000	23500000	14700000	22900000	26500000	22800000	12500000	21400000	45100000	44000000	26600000	33300000	8.14068e+06	31400000	27500000	41700000	14500000	20000000	6.28017e+06	25800000
243.086	11.7967	C9H13N3O5	4	Cytidine	10	Yeastcyc	KEGG_Metacyc_HMDB	0.297502	-0.281713		cor-0'cor-5'cor-10'cor-20'cor-40'QC	Cytidine	0	bp		-0.5	xC13x2-merxK+xNa+	0.15	0.44	45000000	pos116	0		H	pos	31	12700000	17000000	12800000	17900000	17700000	22400000	15400000	14200000	9713528	17300000	8548765	15600000	15800000	12900000	15500000	19000000	12400000	17300000	13500000	19700000	17900000	26700000	14600000
287.196	12.4253	C12H25N5O3	6	Ile-Arg	7	0	Peptides	-0.292548	-5.86587		cor-0'cor-5'cor-10'cor-20'cor-40'QC	Ile-Arg	0	bp		0	xC13x2+	0.12	0.2	44300000	pos117	0		H	pos	31	26200000	31300000	29800000	27500000	24400000	37300000	31300000	26300000	20500000	32000000	24600000	26800000	30200000	20200000	35600000	32300000	25600000	25800000	30400000	26100000	25200000	30300000	32900000
188.08	10.2221	C7H12N2O4	2	N-Acetylglutamine	7	0	HMDB	-0.140062	3.25002		cor-0'cor-5'cor-10'cor-20'cor-40'QC	N-Acetylglutamine	0	bp		-0.4	xC13x-H2Ox-NH3xK+xNa+	0.11	0.37	43200000	pos118	0		H	pospos	31	20300000	30100000	26000000	26200000	26000000	38200000	27300000	27200000	17200000	43200000	17600000	23200000	33800000	20600000	29200000	22500000	23500000	32200000	32500000	27000000	27200000	30600000	24100000
111.043	11.6352	C4H5N3O	1	Cytosine	10	Yeastcyc	KEGG_Metacyc_HMDB	-0.207796	4.3519		cor-5'cor-10'cor-20'cor-40'QC	Cytosine	0	bp				0.21	1.13	42800000	pos120	0		H	posneg	31	5199628	6656469	42800000	7615201	7.05883e+06	8721702	6602319	5298420	3.9584e+06	7.04704e+06	3.60031e+06	6.41228e+06	7118424	5.27228e+06	6.68121e+06	7.66459e+06	24900000	7.48703e+06	5907512	7776486	7676475	11500000	19500000
111.043	11.116	C4H5N3O	1	Cytosine	10	Yeastcyc	KEGG_Metacyc_HMDB	-0.0195813	-0.305335		cor-0'cor-10'QC	Cytosine	0	bp		0.6	xC13	0.19	1.01	42800000	pos119	0		H	pos	31	22000000	27800000	42800000	2.57808e+06	28700000	2.47978e+06	6975175	29600000	8869554	5.46957e+06	36200000	11600000	8750028	39100000	31000000	6.52879e+06	24900000	24300000	1.12557e+06	41000000	10800000	2222295	19500000
112.027	8.57535	C4H4N2O2	3	Uracil	10	Yeastcyc	KEGG_Metacyc_HMDB	0.734841	-1.54593		cor-0'cor-5'cor-10'cor-20'cor-40'QC	Uracil	0	bp		0.3	xC13xNa+	0.05	0.35	42100000	neg51	0		H	neg	31	22300000	28300000	34200000	16100000	27100000	37500000	23100000	25300000	16400000	38000000	21500000	23900000	24000000	18900000	26800000	32800000	20800000	26600000	20200000	21600000	22300000	42100000	20100000
132.054	15.0091	C4H8N2O3	6	L-Asparagine	10	Yeastcyc	KEGG_Metacyc_HMDB	0.496777	0.127112		cor-0'cor-5'cor-10'cor-20'cor-40'QC	L-Asparagine	0	bp		0.2	x-H2OxC13xN15xO18x2-merxNa+	0.04	0.19	41800000	neg52	0		H	neg	31	35900000	37500000	41600000	33500000	38900000	36600000	33900000	35400000	23100000	36000000	29800000	33200000	38300000	25400000	41800000	33200000	31600000	31500000	29600000	26200000	30100000	31100000	34400000
521.348	4.90696	C26H52NO7P	15	LysoPC(18:1)	7	0	Lipidmaps	0.569203	18.4831		cor-0'cor-5'cor-10'cor-20'cor-40	LysoPC(18:1)	0	bp		2.1	xK+xC13	0.67	0.68	41300000	pos122	0		H	pos	30	17800000	21700000	20500000	17700000	19300000	7378728	14000000	19900000	13000000	5.50496e+06	11300000	27500000	41300000	15300000	28000000	2314908	14200000	28200000	27500000	9279445	9450297	3.06992e+06	11100000
853.569	3.93281										cor-0'cor-5'cor-10'cor-20'cor-40'QC		0	bp		C44	x-NH3xC13x-NH3xC13	0.11	0.59	39900000	pos124	0			pos	31	33400000	25200000	29100000	28700000	34800000	9569246	39900000	28200000	29600000	8006409	26100000	30200000	28200000	31800000	36100000	104148	30900000	38500000	34200000	27000000	33600000	118153	26000000
317.293	7.94897	C18H39NO3	1	[SP hydrox] 4-hydroxysphinganine	8	Yeastcyc	KEGG_Metacyc_Lipidmaps_HMDB	0.185588	37.5079		cor-0'cor-5'cor-10'cor-20'cor-40'QC	[SP hydrox] 4-hydroxysphinganine	0	bp		-0.3	xC13	0.39	0.65	39500000	pos126	0		H	posneg	31	28200000	35000000	33300000	28800000	32400000	1.99505e+06	13600000	23400000	18600000	1.69877e+06	21100000	32500000	39500000	17700000	27800000	736871	22400000	27100000	31800000	18800000	17800000	432798	29600000
339.754	20.9027										cor-10'cor-40'QC		0	bp				0.12	0.19	39300000	pos127	0			pospos	31	23600000	29100000	32600000	32600000	26300000	26900000	27300000	33800000	26600000	30300000	28500000	39000000	37700000	32300000	34400000	29000000	27800000	30900000	37800000	24800000	29000000	22400000	31300000
308.131	18.4762										cor-0'cor-5'cor-10'cor-20'cor-40'QC		0	bp		C15	x2+xC13xC13x2+	0.19	0.29	39200000	pos128	0			posneg	31	26000000	32900000	25200000	19400000	32600000	29400000	26500000	25000000	22000000	34700000	18200000	30600000	35000000	18900000	38300000	34000000	22600000	31700000	33600000	25400000	26400000	30300000	25100000
132.079	5.13127	C6H12O3	22	Ethyl (R)-3-hydroxybutanoate	7	0	KEGG	0.545371	-29.0428		cor-0'cor-5'cor-10'cor-20'cor-40'QC	Ethyl (R)-3-hydroxybutanoate	0	bp		-0.5	xACNxC13	0.62	0.62	38900000	neg53	0		H	neg	31	9477492	11600000	14100000	11600000	10600000	16200000	14200000	10900000	7.73656e+06	22400000	11300000	12900000	13100000	7.65167e+06	17100000	20800000	10200000	15200000	13500000	13000000	13500000	26300000	13000000
339.754	11.0081				0.2						cor-5		0	bp		C23	xC13	0.18	0.18	38700000	pos132	0			pospos	31	31000000	27100000	27300000	36900000	32500000	28000000	30400000	31400000	31000000	32300000	21200000	24700000	35900000	29900000	27600000	31300000	30500000	27600000	36400000	27300000	38700000	33500000	27300000
339.754	14.4171										cor-0'cor-5'cor-20'QC		0	bp				0.07	0.13	38600000	pos134	0			pos	31	32400000	29400000	31800000	38600000	32300000	29400000	30700000	32200000	37200000	27500000	31600000	28700000	24800000	33700000	27300000	28400000	33200000	30800000	37600000	30900000	37000000	29700000	29500000
260.03	16.3362	C6H13O9P	45	Hexose phosphate	8	Yeastcyc	KEGG_Metacyc	-0.28842	-3.91196		cor-0'cor-5'cor-10'cor-20'cor-40'QC	Hexose phosphate	0	bp		0.5	xC13xO18x2-mer	0.05	0.64	38500000	neg55	0		H	negposneg	31	9102259	8.16321e+06	27300000	12600000	12000000	22600000	4.02671e+06	14800000	11300000	17400000	4.65309e+06	22100000	32900000	4.63596e+06	18100000	27900000	11200000	31900000	18900000	7877489	12900000	27200000	11100000
612.152	16.9689	C20H32N6O12S2	1	Glutathione disulfide	8	Yeastcyc	KEGG_Metacyc_HMDB	0.155555	0		cor-0'cor-5'cor-10'cor-20'cor-40'QC	Glutathione disulfide	0	bp		2.7	xNa+xC13x2+	0.12	0.34	38300000	pos135	0		H	posneg	31	23700000	26300000	38300000	16400000	25700000	15700000	23200000	25200000	18700000	14200000	27100000	28800000	18200000	31400000	29000000	14700000	28900000	34700000	13800000	27600000	19900000	16600000	29000000
174.1	15.1055	C7H14N2O3	8	N-Acetylornithine	8	Yeastcyc	KEGG_Metacyc_HMDB	-0.16374	19.499		cor-0'cor-5'cor-10'cor-20'cor-40'QC	N-Acetylornithine	0	bp		1.3	x-H2OxC13	0.16	0.26	38200000	pos136	0		H	posneg	31	24400000	29600000	29200000	29500000	29900000	26700000	24100000	20400000	18900000	27900000	19500000	24600000	25000000	21000000	29600000	27300000	23200000	21800000	22400000	22600000	24000000	24500000	22900000
687.484	4.26225	C37H70NO8P	21	PE(32:2)	7	0	0	0.2436	6.15287		cor-0'cor-5'cor-10'cor-20'cor-40'QC	PE(32:2)	0	bp		4.6	xC13	0.28	0.72	38000000	pos138	0		H	pos	31	29100000	30300000	25600000	25900000	23400000	4.47243e+06	19100000	38000000	19100000	3.23258e+06	22800000	25200000	28400000	31500000	34300000	214919	26200000	21800000	29100000	25300000	23000000	219322	31400000
376.301	4.41985				0.2						cor-0'cor-5'cor-10'cor-40		0	bp	xC13				0.83	37800000	pos139	0			pos	26	11200000	29700000	28700000	36700000	23900000	1.74223e+06	8437946	6241426	7352944	6276755	6489617	17200000	21700000	7640404	36500000	5.98507e+06	20500000	5576550	7.0534e+06	30500000	0	24700000	16300000
326.133	14.8038		0		3			2.14824	#N/A		cor-0'cor-5'cor-10'cor-20'cor-40'QC	2,2,4-Trimethyl-3-(4-fluorophenyl)-2H-1-benzopyran-7-ol acetate	0	bp		-10	xO18xC13	0.2	0.78	37700000	neg56	0		H	neg	31	12100000	9054736	9191895	6493929	8448466	22300000	15600000	11700000	5879238	37700000	12200000	9743184	7.69523e+06	8913529	11300000	26500000	8459038	11500000	6930153	12800000	12000000	32900000	8.0086e+06
327.116	14.1758							-4.34633			cor-0'cor-5'cor-10'cor-20'cor-40'QC		0	bp		C13	xC13x-H2O	0.18	0.69	37500000	neg57	0			neg	31	13100000	11500000	13300000	9320293	10100000	27100000	23600000	12000000	6304406	37300000	13500000	12200000	11400000	10500000	15000000	37500000	10600000	16100000	10700000	14500000	15700000	32500000	9822069
223.069	17.4797										cor-0'cor-5'cor-10'cor-20'cor-40'QC		0	bp		C8	xO18x-NH3xC13	0.13	0.25	36600000	pos142	0			pos	31	21900000	22400000	26200000	36600000	22500000	18900000	27100000	23000000	17300000	21500000	30800000	25900000	27000000	23600000	31300000	22400000	33100000	24400000	29000000	27400000	30900000	19500000	31200000
175.868	28.7154										cor-0'cor-5'cor-10'cor-20'cor-40'QC		0	bp				0.12	0.41	36200000	pos144	0			pos	31	20000000	22000000	22800000	15200000	17500000	29200000	22600000	19200000	11300000	32600000	13800000	21400000	14700000	11500000	17200000	27200000	18700000	24000000	16000000	14400000	16000000	36200000	21300000
268.154	5.50183	C12H20N4O3	5	Leucyl-Histidine	7	0	HMDB	0.147584	-42.4423		cor-0'cor-5'cor-10'cor-20'cor-40'QC	Leucyl-Histidine	0	bp		0.3	x-H2OxC13xK+x-FA	0.07	0.27	36100000	pos146	0		H	posneg	31	24100000	26400000	18700000	21800000	18900000	36100000	27500000	25700000	18400000	32500000	19800000	20300000	22200000	20000000	24500000	26700000	21900000	21100000	26600000	23200000	23100000	28700000	26700000
210.056	8.7945							-4.18004			cor-0'cor-5'cor-10'cor-20'cor-40'QC		0	bp		C7	xNa+xS34xC13xK+	0.21	0.26	35800000	pos147	0			posneg	31	20100000	26500000	35800000	19900000	23700000	22200000	19600000	21900000	18000000	19400000	19600000	19300000	29700000	20100000	32400000	18700000	18200000	31300000	22800000	24500000	17300000	19700000	19900000
175.868	29.0915										cor-0'cor-5'cor-10'cor-20'cor-40'QC		0	bp				0.2	0.41	35300000	pos149	0			pos	31	20000000	22000000	18800000	13600000	14900000	29200000	19400000	21000000	11300000	31800000	16300000	21400000	17000000	11200000	18500000	27700000	18700000	24000000	14200000	11700000	14100000	32400000	21300000
117.967	27.9068										cor-0'cor-5'cor-10'cor-20'cor-40'QC		-3.3e-06	bp			xC13xO18	0.11	0.22	34800000	neg59	0			negneg	31	23800000	24400000	29300000	21300000	24400000	30200000	26300000	26300000	17600000	29700000	13700000	22900000	24000000	20900000	26000000	27400000	20800000	20900000	23300000	21900000	21200000	30700000	23300000
339.252	22.7439										cor-0'cor-5'cor-10'cor-20		0	bp		C9	xC13	0.11	0.31	34600000	pos151	0			pos	31	24100000	24000000	28100000	29700000	32000000	26500000	24300000	23100000	25100000	24900000	26300000	27700000	31800000	27100000	33500000	24800000	24700000	23600000	32300000	27200000	34600000	31600000	18800000
301.298	7.71675	C18H39NO2	3	Sphinganine	8	Yeastcyc	KEGG_Metacyc_Lipidmaps_HMDB	0.0331487	39.6311		cor-0'cor-5'cor-10'cor-20'cor-40'QC	Sphinganine	0	bp		-0.3	xC13x-H2O	0.76	0.76	34300000	pos153	0		H	pos	31	34300000	31900000	31800000	28100000	26300000	1.5874e+06	10200000	19100000	17100000	1.66138e+06	19100000	25400000	25400000	18000000	25500000	327219	19900000	18300000	26600000	22300000	20700000	335888	28600000
134.022	15.4695		0		0.2			0.565587	#N/A		cor-0'cor-5'cor-10'cor-20'cor-40'QC	(S)-Malate	0	bp		0.4	xO18xO18x-H2OxC13xC13	0.13	0.32	33500000	neg61	0		H	neg	31	14800000	15500000	22700000	19100000	19000000	14500000	19000000	9751657	13700000	20900000	16700000	16100000	22800000	16000000	20100000	18300000	18700000	13600000	19400000	13900000	18500000	19200000	22000000
189.064	13.514	C7H11NO5	4	N-Acetyl-L-glutamate	10	Yeastcyc	KEGG_Metacyc_HMDB	0.0493802	0.550509		cor-0'cor-5'cor-10'cor-20'cor-40'QC	N-Acetyl-L-glutamate	0	bp		-0.3	xNa+x-H2OxC13xO18xC13xO18	0.11	0.27	33100000	neg62	0		H	neg	31	26900000	29700000	26300000	28400000	33100000	21000000	25600000	23500000	13600000	17700000	17900000	23600000	30500000	16900000	24400000	18400000	19400000	22900000	20600000	18300000	18800000	12000000	21900000
256.117	10.9841	C10H16N4O4	4	Histidinyl-Threonine	7	0	HMDB	-0.337501	7.84099		cor-0'cor-5'cor-10'cor-20'cor-40'QC	Histidinyl-Threonine	-1.84e-05	bp		0	xC13	0.24	0.34	32600000	pos154	0		H	pos	31	24100000	29100000	29100000	20400000	24800000	27700000	32600000	21400000	14900000	31900000	20300000	27200000	27000000	18500000	28300000	27600000	25800000	22700000	25400000	18500000	20000000	30300000	23100000
424.037	14.3313	C12H18N4O7P2S	1	Thiamin diphosphate	10	Yeastcyc	KEGG_Metacyc_HMDB	-0.371878	0.570457	-0.536958	cor-0'cor-5'cor-10'cor-20'cor-40'QC	Thiamin diphosphate	0	bp		0.3	xC13x2+	0.04	0.28	32300000	pos156	0		H	pos	31	16000000	18300000	23300000	20500000	20600000	25200000	22100000	16000000	14300000	26100000	17500000	16800000	20900000	19000000	23100000	20200000	21000000	20700000	23600000	16200000	20200000	26400000	20200000
155.069	17.896	C6H9N3O2	6	3-(Pyrazol-1-yl)-L-alanine	7	0	KEGG_Metacyc	0.091558	32.148		cor-0'cor-5'cor-10'cor-20'cor-40'QC	3-(Pyrazol-1-yl)-L-alanine	0	bp		0.6	xC13	0.2	0.2	32200000	pos159	0		H	pospospos	31	19900000	24700000	26000000	19400000	18200000	23100000	18900000	19500000	17000000	26400000	19800000	20400000	27700000	21700000	27500000	23600000	13600000	21800000	20800000	19200000	22800000	16100000	26900000
678.505	4.3773				0.1						cor-5'cor-10		0	bp	x2-mer	C16	xC13	0.46	0.49	32200000	pos157	0			pos	31	8963455	10800000	11200000	13900000	10200000	9007129	9802785	11000000	11700000	11200000	11500000	11600000	13400000	15400000	13100000	32200000	11800000	10900000	13600000	13500000	8881774	6518537	9138679
151.049	12.1142	C5H5N5O	3	Guanine	8	Yeastcyc	KEGG_Metacyc_HMDB	0.197242	18.9863		cor-0'cor-5'cor-10'cor-20'cor-40'QC	Guanine	0	bp		0.2	xNa+xK+xC13xN15	0.14	0.8	31700000	pos160	0		H	posneg	31	21100000	23600000	31700000	3.95956e+06	24900000	7397268	9417958	20100000	9693968	8.38278e+06	26900000	11300000	11800000	25700000	27900000	11800000	21000000	23100000	3.71339e+06	28000000	9761316	4.18415e+06	12500000
129.043	9.92497		0		0.2			0.190591	#N/A		cor-0'cor-5'cor-10'cor-20'cor-40'QC	L-1-Pyrroline-3-hydroxy-5-carboxylate	0	bp		-0.1	xC13xACN	0.49	0.51	31700000	pos161	0		H	posneg	31	19300000	21800000	31700000	18200000	29400000	24700000	15900000	25400000	22300000	21600000	15300000	23300000	23100000	18100000	21000000	16400000	3823117	8930541	6.98246e+06	4.88303e+06	14500000	6.12022e+06	17300000
303.293	0.094671										cor-5		0	bp		C20	xC13xC13	0.77	0.77	31500000	pos162	0			pos	31	24300000	28500000	22200000	21500000	24300000	26000000	26600000	24600000	24900000	27400000	29700000	27000000	20300000	16800000	22100000	25700000	24700000	22200000	20500000	24200000	21700000	31500000	22500000
182.079	13.7228	C6H14O6	5	L-Iditol	8	Yeastcyc	KEGG_Metacyc_HMDB	0.103425	7.35336		cor-0'cor-5'cor-10'cor-20'cor-40'QC	L-Iditol	0	bp		0.3	xNa+xK+xC13x-H2OxNH3xC13	0.19	0.21	31200000	pos163	0		H	posneg	31	21600000	27100000	30700000	30000000	23900000	27600000	20100000	22400000	25700000	25100000	18300000	21100000	27200000	15000000	25600000	22900000	22700000	22500000	29200000	17400000	25100000	22600000	22600000
175.868	29.768										cor-0'cor-5'cor-10'cor-20'cor-40'QC		0	bp				0.26	0.4	30500000	pos164	0			pos	31	17700000	20800000	17500000	12000000	13400000	24400000	19200000	18000000	9597276	27300000	12400000	18200000	12700000	10800000	14600000	25300000	16200000	22800000	11600000	10400000	11100000	25900000	19900000
147.035	14.6717	C5H9NO2S	1	Thiomorpholine 3-carboxylate	QC	0	KEGG_Metacyc_HMDB	0.373207	13.1397		QC	Thiomorpholine 3-carboxylate	0	bp				0.12	1.5	30200000	pos165	0		H	pos	29	5.44733e+06	5240495	10400000	3969104	4732706	0	2.31608e+06	3.63293e+06	10200000	847360	7383901	3.98846e+06	3306158	21800000	5.03964e+06	774038	4462554	30200000	1.65304e+06	10600000	1.53396e+06	1.79351e+06	24400000
126.105	4.42974	C8H14O	33	FA (8:1) octenal	7	0	Lipidmaps_HMDB	0.428798	-14.747		cor-0'cor-5'cor-10'cor-20'cor-40'QC	FA (8:1) octenal	0	bp		-0.1	xC13	0.61	0.61	29800000	neg64	0		H	neg	31	7.39951e+06	13600000	11900000	13000000	15100000	6553436	9976829	12100000	13400000	8309014	10500000	16200000	13400000	19100000	17000000	7.68017e+06	14200000	16000000	29800000	11400000	5492613	8.32459e+06	11200000
431.273	5.0952							-2.60617			cor-5'cor-10		0	bp		C20	xC13	0.68	1.16	28200000	pos167	0			pos	30	2.12361e+06	791862	11600000	4272959	3.7642e+06	917890	6885520	6.50071e+06	8708536	1.14931e+06	18100000	6.07584e+06	5592338	13400000	2.96747e+06	8619988	440959	4306571	5633368	19000000	28200000	4349870	4714157
254.138	8.92658	C11H18N4O3	5	Valyl-Histidine	7	0	HMDB	-0.402569	3.64468		cor-0'cor-5'cor-10'cor-20'cor-40'QC	Valyl-Histidine	0	bp		0.9	xC13xK+	0.24	0.44	28100000	pos168	0		H	pos	31	22200000	22100000	21400000	21100000	18800000	20800000	24800000	9693492	14800000	28100000	16700000	23200000	23000000	13200000	22300000	21400000	16000000	23400000	22000000	14200000	16100000	19700000	17300000
339.754	22.0571				0.2						cor-10'cor-20'cor-40'QC		0	bp			x2-mer	0.15	0.33	27800000	pos169	0			pos	31	12000000	10900000	11300000	11200000	22100000	18000000	12700000	8524683	15900000	9657877	19100000	20700000	21900000	24500000	24700000	22800000	20700000	19000000	20800000	22800000	25000000	20100000	20400000
117.967	29.2656										cor-0'cor-5'cor-10'cor-20'cor-40'QC		0	bp				0.11	0.24	27500000	neg67	0			neg	31	19600000	20200000	20200000	16300000	16700000	24700000	21300000	21200000	13600000	25400000	17200000	21000000	18900000	14300000	16600000	25000000	19200000	22100000	17200000	15100000	16900000	27500000	20900000
190.084	5.02473		0		0.4			0.241424	#N/A		cor-0'cor-5'cor-10'cor-20'cor-40	(R)-3-((R)-3-Hydroxybutanoyloxy)butanoate	0	bp		-0.3	x-CO2x-CO2xC13	0.94	0.94	27400000	neg68	0		H	neg	31	7.44013e+06	7847057	5.91483e+06	5.06829e+06	6151906	7144882	7.08739e+06	6189881	3382525	9004173	4585933	6.74426e+06	5403070	4945655	7.0994e+06	5810856	6.75564e+06	8212352	4.57291e+06	4.29333e+06	5256535	7.52999e+06	6894461
130.063	4.8808	C6H10O3	25	4-Methyl-2-oxopentanoate	10	Yeastcyc	KEGG_Metacyc_HMDB	0.874888	1.05174		cor-0'cor-10'cor-20'cor-40'QC	4-Methyl-2-oxopentanoate	0	bp		0.7	xC13	0.7	0.85	27100000	neg70	0		H	neg	31	6.0694e+06	6.26375e+06	6338018	4.58099e+06	5368493	14600000	10600000	6140337	3359691	24900000	5.98058e+06	5.61417e+06	4602301	5.4476e+06	7362440	13800000	5461294	7.45473e+06	4153160	7.65487e+06	7.34607e+06	24000000	5162511
158.033	10.6217	C5H6N2O4	3	(S)-Dihydroorotate	10	Yeastcyc	KEGG_Metacyc_HMDB	-0.409921	1.5463		cor-0'cor-5'cor-10'cor-20'cor-40'QC	(S)-Dihydroorotate	0	bp		-0.6	xO18x-CO2xN15xC13	0.19	0.68	26400000	neg72	0		H	neg	31	9174491	9919339	18100000	11800000	2.51326e+06	2.00925e+06	12800000	9067135	10800000	4.09182e+06	10400000	12100000	18500000	6725903	6149079	5205880	13800000	9663717	21800000	5717945	8.08223e+06	9188944	19200000
123.032	5.73401		0		4.5			0.58525	#N/A		cor-0'cor-5'cor-40'QC	Isonicotinic acid	0	bp		0.3	xC13	0.32	0.87	25800000	pos171	0		H	pos	31	1.94086e+06	3.81924e+06	4.68545e+06	3.62751e+06	4495314	11900000	9023942	3837764	4.32495e+06	15900000	2.77714e+06	3.95474e+06	4.78435e+06	3.87866e+06	5913608	17900000	5092970	4.16535e+06	4.73896e+06	5.85087e+06	5.10392e+06	20000000	8466482
219.111	8.4682	C9H17NO5	1	Pantothenate	10	Yeastcyc	KEGG_Metacyc_HMDB	-0.125786	1.53722		cor-0'cor-5'cor-10'cor-20'cor-40'QC	Pantothenate	0	bp		1.4	x-H2OxC13xK+xNa+	0.2	0.25	25700000	pos172	0		H	pos	31	15600000	16600000	17300000	20300000	18100000	17200000	16100000	18500000	10800000	19200000	15700000	16600000	21200000	13500000	25700000	16000000	15200000	19400000	16100000	12900000	18800000	15500000	15600000
148.037	14.3423		0		0.2			0.0909925	#N/A		cor-0'cor-5'cor-10'cor-40'QC	D-Arabinono-1,4-lactone	0	bp			x-H2O	0.66	0.81	25200000	neg75	0		H	negneg	31	8430217	4.95083e+06	5.47299e+06	5785196	7.77661e+06	5.19671e+06	8537593	9839270	9071886	7736880	16900000	4863519	9097526	4.47108e+06	14800000	9636554	17300000	4642267	6293051	25200000	5.39797e+06	5.14781e+06	5.66606e+06
174.112	24.6556		0		0.2			-0.163685	#N/A		cor-0'cor-5'cor-10'cor-20'cor-40'QC	L-Arginine	0	bp		-0.3	xC13	0.15	0.32	25200000	pos174	0		H	pos	31	20100000	21600000	19900000	15200000	18600000	23500000	24600000	19800000	11100000	24400000	17300000	20500000	18000000	13600000	21000000	25200000	17500000	21900000	12800000	14600000	14800000	25000000	18900000
135.054	7.9084		0		0.2			-1.36565	#N/A		cor-0'cor-10'cor-20'cor-40'QC	Adenine	0	bp				0.19	1.42	24400000	pos175	0		H	posneg	31	9589166	8682816	7.50222e+06	3938524	6.05149e+06	19900000	2.28586e+06	2.81461e+06	1.73489e+06	24400000	7461822	7957388	7.68753e+06	6176435	9605827	22000000	2.18297e+06	2.40593e+06	4967131	7.75851e+06	2.35449e+06	1.93399e+06	5.25708e+06
266.155	3.85544	C12H26O4S	1	sodium dodecyl sulfate	7	0	Metacyc	-0.0443519	-10.1573		cor-0'cor-5'cor-20'cor-40'QC	sodium dodecyl sulfate	0	bp		-1.4	xC13	0.23	0.94	24000000	neg77	0		H	neg	31	6209651	8380582	18800000	19800000	7.90484e+06	6.11169e+06	5071635	8687700	17400000	4444237	5.47659e+06	18900000	24000000	2.90898e+06	4.72332e+06	2.75652e+06	5763950	18500000	20700000	3.7248e+06	12800000	9391223	12500000
372.226	5.36139				0.2						cor-0'cor-5'cor-10'cor-20'cor-40'QC		0	bp		C19	xC13	0.3	0.37	23800000	pos180	0			pos	31	13400000	15900000	13300000	16900000	13900000	9519868	14200000	14500000	15400000	8.1524e+06	12900000	17100000	15000000	9011658	13200000	7491565	14800000	12500000	23800000	13600000	13000000	7959943	20300000
555.317	5.07199										cor-0'cor-5'cor-10'cor-20'cor-40'QC		0	bp		C25	xC13	0.15	0.44	23500000	neg78	0			neg	31	12700000	14600000	21800000	13300000	13900000	9097610	13500000	16400000	11700000	12900000	10000000	19300000	23500000	12900000	21300000	6.10707e+06	12000000	23500000	16200000	10100000	15800000	9828573	13800000
259.19	12.5594	C12H25N3O3	6	Ile-Lys	7	0	Peptides	-0.217246	0.378677		cor-0'cor-5'cor-10'cor-20'cor-40'QC	Ile-Lys	0	bp		1.1	xC13xNa+	0.09	0.18	22900000	pos183	0		H	pos	31	14700000	19000000	20300000	19900000	18000000	18600000	15800000	14400000	11100000	17500000	16000000	16500000	17900000	12200000	20700000	15500000	15100000	15600000	20400000	13800000	18500000	18200000	18200000
117.967	30.2055										cor-0'cor-5'cor-10'cor-20'cor-40'QC		0	bp				0.16	0.27	22900000	neg79	0			neg	31	17000000	18100000	16400000	13100000	12600000	21000000	16300000	17100000	9909100	20300000	14600000	16900000	14500000	12000000	15300000	21400000	16900000	20900000	13400000	12300000	13700000	22300000	16800000
115.944	29.0162										cor-5'cor-10'cor-40'QC		0	bp				0.09	0.43	22500000	neg80	0			neg	31	8.08683e+06	6521540	5.82634e+06	5.67657e+06	5.93029e+06	6354499	19000000	21200000	22500000	20300000	22200000	20500000	19700000	19700000	21000000	18900000	17300000	17900000	6544431	22400000	7.37975e+06	17700000	21700000
131.095	11.741		0		0.2			0.277835	#N/A		cor-0'cor-5'cor-10'cor-20'cor-40'QC	L-Isoleucine	0	bp				0.39	0.42	22400000	pos184	0		H	pos	31	9631920	14500000	15600000	17100000	17300000	11800000	16300000	9010448	8506061	17900000	6.07619e+06	7722015	7.06223e+06	6.16593e+06	13800000	12400000	11400000	13500000	9033693	7478153	11300000	22400000	13800000
129.017	11.2931		0		4.5			0.271931	#N/A		cor-20'QC	Cyanuric acid	0	bp				0.33	1.97	22200000	neg81	0		H	neg	26	0	0	805614	4.31247e+06	98200.4	0	4.02013e+06	65868.3	2.70768e+06	0	2.05625e+06	4650897	3.75354e+06	775890	0	104850	2.64819e+06	9010456	5581904	5168237	5.73786e+06	4.85757e+06	22200000
360.127	14.6293										QC		0	bp				0.17	1.33	22100000	neg82	0			neg	31	2.2805e+06	1.82385e+06	1.73282e+06	962400	1391452	9956234	6.18841e+06	2.37215e+06	702424	18200000	2.41986e+06	1.87566e+06	1505421	1.46639e+06	3.48766e+06	15900000	1.90362e+06	4189383	1.15387e+06	3296826	3.22659e+06	22100000	1.25284e+06
203.082	16.9432	C14H26N6O6S	1	Glu-Arg-Cys	7	0	Peptides	0.0957888	5.56665		cor-0'cor-5'cor-10'cor-20'cor-40'QC	Glu-Arg-Cys	0	bp		0.8	xC13x2-mer	0.36	0.46	22000000	pos185	0		2-charge	pos	31	6.80612e+06	16800000	7.79331e+06	11500000	16100000	16300000	11600000	10200000	6.60703e+06	14300000	4375739	13100000	10300000	5.5364e+06	15000000	16200000	8651643	6.56225e+06	17300000	6221063	15200000	16800000	13500000
242.102	11.9076	C9H14N4O4	5	(S,S)-Np-Histidinylalanine	7	0	HMDB	0.11503	-32.7009		cor-0'cor-5'cor-10'cor-20'cor-40'QC	(S,S)-Np-Histidinylalanine	0	bp		-1.2	xC13xACNxNa+xK+	0.15	0.31	22000000	pos186	0		H	posneg	31	16900000	20000000	14600000	15200000	14800000	18700000	19900000	17300000	12100000	19000000	11100000	16400000	16500000	8802533	15500000	22000000	16400000	17700000	17300000	9880204	17000000	19600000	12200000
181.074	12.7774	C9H11NO3	13	L-Tyrosine	10	Yeastcyc	KEGG_Metacyc_HMDB	0.0601424	0.293829		cor-0'cor-5'cor-10'cor-20'cor-40'QC	L-Tyrosine	0	bp		0	x2-merxK+xC13xNa+xK+	0.12	0.28	21700000	neg83	0		H	neg	31	17800000	19000000	17800000	15300000	20800000	20900000	19200000	16400000	10500000	21700000	14900000	17400000	15200000	12700000	21400000	16000000	15500000	19700000	13900000	12700000	16900000	17400000	19300000
117.967	30.7641										cor-0'cor-5'cor-10'cor-20'cor-40'QC		0	bp				0.2	0.35	21700000	neg84	0			negneg	31	15800000	17000000	14600000	11500000	11200000	18700000	15900000	15600000	9154974	19200000	14000000	15000000	12900000	10300000	12700000	19900000	13900000	16800000	11200000	9394259	9555581	21700000	15700000
647.413	4.59738										cor-10		0	bp				0.71	1.35	21700000	pos188	0			pos	27	9876118	7585148	21700000	1480831	9392921	279830	2.31027e+06	9408230	7.14546e+06	276847	9761290	8556941	6516213	15100000	11300000	201250	7871605	10200000	834676	15500000	1.55077e+06	0	6.03688e+06
391.323	4.46861										cor-5'cor-10'QC		0	bp				0.37	0.99	21100000	pos189	0			pos	31	6924892	5.02488e+06	21100000	1.93154e+06	9592147	425658	6458173	7670273	11100000	402658	8952477	11500000	6926075	18800000	9947417	103227	9253206	13000000	1445597	15500000	4.97948e+06	182854	6.65925e+06
146.069	15.642		0		0.2			-0.0186935	#N/A		cor-0'cor-5'cor-10'cor-20'cor-40'QC	D-Glutamine	0	bp				0.41	0.65	21000000	pos190	0		H	posneg	31	8.13286e+06	19600000	14300000	7491413	15700000	6.53648e+06	8611428	15500000	11700000	6.09331e+06	7.68964e+06	13100000	6358495	4795119	7.24964e+06	7219132	5819352	5.62303e+06	10600000	21000000	5.47002e+06	7.09196e+06	13800000
531.348	3.80065				0.4			-2.71473			cor-0'cor-5'cor-10'cor-20'cor-40		0	bp		C31	xC13	1.01	1.01	20700000	pos194	0			pos	31	2.63906e+06	2.93328e+06	2.61758e+06	3.78899e+06	1487318	4094131	4285832	3.2732e+06	2.31028e+06	3.25347e+06	4.2327e+06	2.34145e+06	2.37715e+06	2.46582e+06	2.96162e+06	1.99321e+06	3.64975e+06	2.09697e+06	3.37871e+06	2.78887e+06	2.45426e+06	1.71917e+06	4.27006e+06
175.868	31.1483										cor-0'cor-5'cor-10'cor-20'cor-40'QC		0	bp				0.23	0.31	20500000	pos195	0			pos	31	12900000	14100000	12100000	9779658	10100000	18100000	13600000	15700000	8120038	15500000	10900000	14100000	9748129	8077583	11100000	17800000	13400000	15100000	9075161	8709416	8417034	17200000	15700000
119.911	5.50815										cor-0'cor-5'cor-10'cor-20'cor-40'QC		0	bp			xC13xCl37	0.22	0.42	20000000	neg86	0			neg	31	16600000	17400000	17400000	20000000	18100000	6.96249e+06	12300000	17100000	15700000	6236895	14800000	13600000	15400000	13000000	18000000	3.4696e+06	15300000	14400000	19400000	17000000	14900000	2.93971e+06	14500000
819.563	4.43961				0.2						cor-0'cor-5'cor-10'cor-20'cor-40'QC		0	bp		C44	xC13	0.27	0.77	19900000	neg87	0			neg	31	11400000	11000000	10200000	9890450	11800000	3.85473e+06	10500000	9682114	9042239	1.98929e+06	7385891	9066325	3.73237e+06	2.7227e+06	2.78808e+06	126108	10300000	11400000	13700000	10400000	11400000	81608.6	9160906
212.091	11.5526	C8H12N4O3	3	Glycyl-Histidine	7	0	HMDB	0.278758	8.98184		cor-0'cor-5'cor-10'cor-20'cor-40'QC	Glycyl-Histidine	0	bp		-0.3	xC13	0.12	0.3	19600000	pos197	0		H	pos	31	11400000	11800000	13000000	17200000	12300000	12200000	16200000	10400000	8275175	12700000	9581490	12000000	11300000	10400000	11400000	15800000	13200000	12600000	11100000	8.16798e+06	11300000	19600000	11100000
614.397	9.41715	C32H58N2O7S	1	CHAPS	7	0	KEGG_Metacyc	0.161514	0	-0.91271	cor-0'cor-5'cor-10'cor-20'cor-40'QC	CHAPS	0	bp		0	xC13xK+xNa+	0.19	0.19	19500000	pos198	0		H	posneg	31	13900000	12600000	14400000	17400000	15400000	12800000	14100000	12500000	16600000	12000000	12300000	12200000	15100000	11800000	13000000	11800000	12300000	11300000	14700000	15100000	13600000	13600000	14200000
117.915	5.8273		0		0.2			1.04427	#N/A		cor-0'cor-5'cor-10'cor-20'cor-40'QC	Chloroform	0	bp				0.2	0.43	19300000	neg88	0		H	neg	31	14500000	15500000	6.7143e+06	15100000	18300000	5.55663e+06	12700000	17500000	16300000	6221838	15700000	18600000	18900000	12700000	17400000	3.9536e+06	16600000	17900000	19300000	16900000	15000000	3.09262e+06	17000000
339.074	16.6074										cor-5'cor-10'QC		0	bp		C12	xClxC13x2+	0.11	1.3	19000000	neg89	0			negpos	31	7.90257e+06	11600000	19000000	1.10042e+06	8161221	518416	2.42902e+06	6562852	4.12611e+06	733602	14000000	5.9947e+06	5375554	14000000	10800000	1.21532e+06	8.16351e+06	11800000	562641	10200000	2.85292e+06	580419	3781476
158.058	10.1349		0		0.2			-0.102125	#N/A		cor-0'cor-5'cor-10'cor-20'cor-40'QC	2-Isopropylmaleate	0	bp			x-CO2	0.66	0.66	18800000	neg91	0		H	negneg	31	5822689	6361377	6.06389e+06	8879151	13000000	8550868	6823867	5.2234e+06	5560419	8642692	9954586	9563557	15600000	9394714	18800000	16500000	5.30581e+06	3.37799e+06	3.63483e+06	6483860	7916400	8776120	11500000
152.033	10.9142	C5H4N4O2	3	Xanthine	8	Yeastcyc	KEGG_Metacyc_HMDB	-0.0657847	9.22833		cor-0'cor-5'cor-10'cor-20'cor-40'QC	Xanthine	0	bp		0.3	xC13	0.15	0.28	18700000	neg92	0		H	neg	31	12500000	14700000	17700000	8998242	17200000	18500000	14000000	16100000	10400000	13900000	9704415	18300000	13600000	9594274	18700000	14800000	10100000	11900000	11300000	5725466	9271518	13300000	7295317
339.252	23.6132										cor-5		0	bp				0.2	0.2	18700000	pos201	0			pospospos	31	10500000	14500000	16800000	15900000	15900000	15100000	14000000	12300000	16500000	14300000	10800000	12500000	17200000	14000000	15700000	14600000	12600000	11900000	13100000	11600000	15000000	12200000	11600000
185.993	16.3433	C3H7O7P	4	3-Phospho-D-glycerate	10	Yeastcyc	KEGG_Metacyc_HMDB	-0.21321	-0.0407271		cor-0'cor-5'cor-10'cor-20'cor-40'QC	3-Phospho-D-glycerate	0	bp		0.2	xO18xC13x2-merxNa+	0.05	0.41	18500000	neg93	0		H	neg	31	5.75922e+06	6.18296e+06	7843984	7.86279e+06	7097137	11900000	7.33786e+06	5809890	6235293	12900000	6.6066e+06	8084426	9215187	9305054	11100000	14600000	7.40993e+06	8918065	8.1817e+06	12200000	13600000	12500000	10700000
155.069	19.0455		0		0.2			0.100586	#N/A		cor-0'cor-5'cor-10'cor-20'cor-40'QC	3-(Pyrazol-1-yl)-L-alanine	0	bp				0.05	0.25	18500000	pos202	0		H	pos	31	11100000	8451904	13100000	11600000	11600000	13300000	13700000	10400000	7.2095e+06	10400000	8690548	11300000	10300000	10100000	11000000	7.66013e+06	9701002	13900000	12000000	9912830	9545629	8796747	14400000
119.911	6.00897				0.2						cor-0'cor-5'cor-10'cor-20'cor-40'QC		0	bp			xCl37xCl37	0.23	0.43	18300000	neg94	0			negnegneg	31	16600000	15400000	17800000	16600000	17100000	6.96249e+06	10400000	15600000	12600000	5434462	15200000	18300000	18300000	12000000	15600000	3.74967e+06	15200000	18000000	15200000	12200000	13500000	3.057e+06	16900000
211.088	12.2502										cor-5'cor-10'cor-20'cor-40'QC		0	bp				0.06	0.14	18100000	pos205	0			pospos	31	13400000	12200000	9862635	13300000	11800000	15100000	15800000	14000000	16100000	15900000	12300000	16200000	13800000	13400000	12800000	14800000	14500000	12400000	18100000	12900000	14200000	13300000	14300000
522.991	18.5122	C10H16N5O14P3	6	GTP	10	Yeastcyc	KEGG_Metacyc_HMDB	0.525723	-0.472091		cor-5'cor-10'cor-20'cor-40'QC	GTP	0	bp		1.6	x2-merxC13xO18	0.15	0.82	18000000	neg96	0		H	negpos	31	3.14902e+06	2.61605e+06	3.14606e+06	4011412	3.03454e+06	12700000	9421950	4.38903e+06	3.82257e+06	12500000	4257742	3.68179e+06	2501133	4594178	9023242	11000000	3.90292e+06	4695583	3.24078e+06	6.38844e+06	8927001	14600000	4.1892e+06
289.139	18.0307	C10H19N5O5	3	Asp-Arg	7	0	Peptides	-0.129661	-10.4281		cor-0'cor-5'cor-10'cor-20'cor-40'QC	Asp-Arg	0	bp		0.1	xC13	0.09	0.23	17900000	pos206	0		H	pos	31	12800000	13700000	14000000	11000000	11900000	16800000	12100000	10300000	7845364	13900000	9162300	9545341	12500000	10000000	11700000	11900000	13000000	14100000	9982911	11300000	10700000	11700000	14200000
355.069	17.5538	C11H21N3O4S3	1	Met-Cys-Cys	ppm	0	Peptides	-2.23462	43.1517		cor-10'QC	Met-Cys-Cys	0	bp		-0.5	x2+xC13	0.07	1.51	17900000	neg97	0		H	negpos	31	6476034	9919918	17900000	541505	8.34204e+06	220448	808828	5.96684e+06	2998877	351076	9507752	4.64753e+06	3.69738e+06	8557604	8719082	679392	6.18023e+06	9128407	195647	6391431	1.50278e+06	245269	2.62637e+06
175.868	31.5588										cor-0'cor-5'cor-10'cor-20'cor-40'QC		0	bp				0.22	0.31	17800000	pos207	0			pos	31	12500000	12700000	10100000	8796778	8.33944e+06	15400000	13200000	13500000	7552943	17200000	9525726	12900000	9193736	7.41055e+06	11100000	16300000	11200000	14100000	8894616	8752209	8621159	17200000	13100000
195.065	5.80933				0.4			-6.38117			cor-0'cor-5'cor-10'cor-20'cor-40		0	bp				1.74	1.74	17600000	neg99	0			neg	31	484662	507922	592244	556823	871040	656720	571609	515130	281650	532202	457583	638506	889943	476632	818478	633032	534952	496172	493683	329667	394919	727933	652717
211.088	13.2444										cor-5'cor-10'cor-20'cor-40'QC		0	bp				0.07	0.2	17500000	pos208	0			pospos	31	11800000	13200000	12800000	17500000	9997895	15100000	13100000	13500000	15000000	11000000	11400000	12300000	14400000	11500000	11700000	14300000	13400000	14400000	15700000	11100000	13900000	12800000	13000000
102.068	5.14147	C5H10O2	21	ethyl propionate	7	0	Lipidmaps_HMDB	-0.0322043	22.2013		cor-0'cor-5'cor-10'cor-20'cor-40	ethyl propionate	0	bp		2.1	xC13	0.65	0.65	17400000	neg101	0		H	neg	31	7.65011e+06	7349338	11100000	6.75519e+06	6.95184e+06	6703774	5.76358e+06	8014326	5.06731e+06	7.15986e+06	7.82268e+06	9214593	10300000	4.33319e+06	9286801	9102525	9011064	11000000	13700000	5209954	7440263	12800000	9408867
531.273	5.03099				0.1						cor-0'cor-5'cor-10'cor-20'cor-40		0	bp	xK+	C25	xC13	0.93	0.93	17400000	pos211	0			pos	30	9888587	12200000	13400000	7.42102e+06	7489282	15200000	10400000	12200000	6.46826e+06	16300000	363504	17400000	9363312	4.24258e+06	5.257e+06	7.95662e+06	11400000	15400000	10700000	179038	7.61025e+06	9462656	13300000
237.868	28.5499										cor-0'cor-5'cor-10'cor-20'cor-40'QC		0	bp				0.19	0.44	17300000	neg103	0			neg	31	8861716	10300000	10100000	6.74724e+06	7361423	13300000	8464418	7161017	3.51037e+06	11800000	5.61836e+06	8721741	7261787	4470700	8501183	11400000	8391894	10900000	7.38417e+06	5591308	6837659	15700000	10200000
237.868	29.4499				0.2						cor-0'cor-5'cor-10'cor-20'cor-40'QC		0	bp			x3-mer	0.19	0.39	17200000	neg104	0			neg	31	9741276	11300000	10100000	6608102	7.34159e+06	14600000	7935653	9443705	5328286	12000000	7654456	9019723	6534875	4.85995e+06	6115688	11500000	8191948	11600000	6.20205e+06	6262850	6.62357e+06	14800000	9723764
339.252	23.5025				0.2						cor-0'cor-10		0	bp				0.03	0.39	17200000	pos214	0			pospospos	31	13400000	14500000	16800000	15900000	15900000	15800000	10800000	3932635	11100000	11400000	12800000	12500000	17200000	14200000	15700000	14600000	12600000	11900000	14500000	13500000	15000000	13300000	12200000
165.065	9.7004	C6H7N5O	5	3-Methylguanine	7	0	KEGG_HMDB	0.502456	3.41696		cor-0'cor-5'cor-10'cor-20'cor-40'QC	3-Methylguanine	0	bp		0	xC13xN15	0.12	0.37	16900000	pos215	0		H	pos	31	9750276	12100000	15400000	14500000	13500000	16400000	12000000	8414433	6238446	14900000	6.07315e+06	7609965	12300000	7.57845e+06	10800000	15300000	7.44933e+06	6.88571e+06	9975955	6.675e+06	9282325	13100000	9142830
254.138	8.32491	C11H18N4O3	5	Valyl-Histidine	7	0	HMDB	-0.50645	-3.31932		cor-0'cor-5'cor-10'cor-20'cor-40'QC	Valyl-Histidine	0	bp				0.57	0.57	16800000	pos217	0		H	pos	31	4283125	5.18035e+06	4.76316e+06	3.54821e+06	3907835	4581849	6.20488e+06	5017811	3.22841e+06	4.20369e+06	5.47745e+06	5616530	6.4266e+06	4.05012e+06	8977743	5926598	5.20951e+06	6.50277e+06	5248840	4095735	4524366	4.41693e+06	4408757
607.378	4.98165										cor-10'cor-40		0	bp		C18	xC13	0.68	1.15	16600000	pos218	0			pos	30	1.87859e+06	674738	9632243	3247010	2.24423e+06	238268	2.09968e+06	7035648	8468045	363041	10900000	5.18749e+06	5013565	5.03503e+06	3.63187e+06	2405300	322739	3769889	4806058	6.86255e+06	16600000	1.04121e+06	1592086
211.088	11.0389										cor-0'cor-5'cor-10'cor-20		0	bp				0.22	0.22	16500000	pos219	0			pospos	31	14300000	12400000	11200000	14700000	11200000	12200000	12500000	15500000	14800000	15000000	14300000	16200000	14200000	13000000	11600000	14100000	15400000	11900000	15100000	12200000	16500000	13700000	16200000
147.09	12.1251	C6H13NO3	4	N-hydroxyisoleucine	7	0	Metacyc	0.0130136	30.5559		cor-0'cor-5'cor-10'cor-20'cor-40'QC	N-hydroxyisoleucine	0	bp		-0.2	x3-merxC13x3-merx-H2O	0.19	0.26	15900000	pos225	0		H	pos	31	11400000	13200000	12200000	10100000	11600000	11600000	12100000	10100000	6.23985e+06	11200000	12300000	9621565	11600000	10800000	15900000	9597472	13600000	10900000	8557357	10000000	7.86572e+06	9184857	10900000
161.957	31.0075										cor-0'cor-5'cor-10'cor-20'cor-40'QC		0	bp				0.22	0.31	15900000	neg108	0			neg	31	11600000	13700000	11600000	8034556	8563318	14200000	12100000	13500000	7.05796e+06	15800000	9855504	12900000	9100520	6989056	8404419	15900000	11100000	13100000	9077411	8576392	8.01454e+06	14700000	11600000
211.105	13.4339										cor-0'cor-5'cor-10'cor-40'QC		0	bp				0.08	1.26	15900000	pos224	0			pos	31	4341632	5447610	6.78325e+06	3.39537e+06	11700000	3590002	1.17074e+06	9641136	14300000	4.5214e+06	1.02863e+06	10300000	6363132	590297	3.70286e+06	8460787	1.70004e+06	5860026	15900000	1.37579e+06	1.66995e+06	1.18713e+06	1.73457e+06
351.164	12.2081										cor-0'cor-5'cor-10'cor-20'cor-40'QC		0	bp		C13	xC13	0.14	0.28	15700000	pos226	0			pos	31	9723779	10300000	10600000	10700000	11500000	13900000	12500000	10400000	7270426	13700000	8309891	13800000	11900000	9003511	10300000	10900000	10100000	8816411	15700000	7.24063e+06	9760231	12200000	11300000
172.004	11.3882										cor-0'cor-5'cor-40'QC		0	bp				0.42	1.83	15600000	neg110	0			neg	31	521997	912261	594586	235286	648248	415996	433696	561131	1.17806e+06	481036	9287794	831278	305721	429263	363020	848679	182393	302083	973380	2.51801e+06	15600000	330093	559937
211.088	10.4013										cor-0'cor-5'cor-10'cor-20'cor-40		0	bp				0.21	0.21	15600000	pos227	0			pos	31	11000000	13100000	12400000	15600000	10900000	14600000	13100000	13000000	11900000	15000000	12800000	11800000	14100000	11100000	11900000	15200000	12300000	13800000	13400000	12500000	12800000	12000000	13200000
572.296	7.65155	C25H49O12P	1	[PI(16:0)] 1-hexadecanoyl-sn-glycero-3-phospho-(1'-myo-inositol)	7	0	Lipidmaps	0.264871	47.723		cor-0'cor-5'cor-10'cor-20'cor-40'QC	[PI(16:0)] 1-hexadecanoyl-sn-glycero-3-phospho-(1'-myo-inositol)	0	bp		0.5	xC13	0.21	0.44	15500000	neg111	0		H	neg	31	11600000	10600000	11900000	7.61938e+06	10200000	9829721	10000000	9317223	9324944	8405776	7606833	9723845	15500000	7374668	14400000	4.45876e+06	7.49791e+06	8226625	14200000	6.39827e+06	8532914	4.88024e+06	10500000
214.132	8.60582	C10H18N2O3	4	Val-Pro	7	0	Peptides	-0.0654093	-25.7579		cor-0'cor-5'cor-10'cor-20'cor-40'QC	Val-Pro	0	bp		-2.1	xC13	0.28	0.28	15400000	pos228	0		H	pos	31	9751433	10300000	8685135	8026942	8014550	8990059	9488089	9026906	5140838	10500000	6989150	8.33989e+06	10100000	6.33993e+06	11900000	10500000	5559160	9929095	8.28528e+06	5643741	7.28619e+06	10600000	8.02204e+06
482.985	17.6648	C9H16N3O14P3	1	CTP	10	Yeastcyc	KEGG_Metacyc_HMDB	0.51728	-0.0857837		cor-0'cor-5'cor-10'cor-20'cor-40'QC	CTP	0	bp			xO18	0.18	0.56	15400000	neg112	0		H	neg	31	2.17037e+06	1.71137e+06	2854067	3.12928e+06	2.02637e+06	6.37485e+06	6026655	2709606	2607542	7.23332e+06	3.41648e+06	2974968	2.484e+06	3.61666e+06	5.05706e+06	6474244	4.01261e+06	4.03733e+06	2862022	5628696	6326946	10700000	4950444
214.132	7.8958		0		0.4			-0.244738	#N/A		cor-0'cor-5'cor-10'cor-20'cor-40	Val-Pro	0	bp				1.1	1.1	15400000	pos229	0		H	pospos	31	2.45942e+06	3.26254e+06	2870781	2.59608e+06	2.84071e+06	2.41994e+06	3.02669e+06	2.41809e+06	1.89674e+06	2.56436e+06	2.45303e+06	2032666	2.8598e+06	1.74938e+06	3.28282e+06	1.96323e+06	2.37001e+06	2.70251e+06	2.42335e+06	1.91414e+06	2181081	2.28034e+06	2.50846e+06
463.074	17.6524	C14H18N5O11P	2	N6-(1,2-Dicarboxyethyl)-AMP	8	Yeastcyc	KEGG_Metacyc_HMDB	0.419397	0		cor-0'cor-5'cor-10'cor-20'cor-40'QC	N6-(1,2-Dicarboxyethyl)-AMP	0	bp		2	xC13	0.1	0.49	15300000	pos230	0		H	pos	31	2.18117e+06	2.0115e+06	3.57706e+06	4749379	2.94868e+06	4.45064e+06	5812020	2.49509e+06	3.47098e+06	7831746	4.73799e+06	4.46499e+06	5.47903e+06	3.68155e+06	6.12913e+06	7184972	4506188	3.3533e+06	5.43134e+06	9099638	8243484	9891852	8820114
483.969	17.1667	C9H15N2O15P3	1	UTP	10	Yeastcyc	KEGG_Metacyc_HMDB	0.248362	-0.424958		cor-0'cor-5'cor-10'cor-20'cor-40'QC	UTP	0	bp		0.3	xC13xO18x2+	0.1	0.37	15300000	neg113	0		H	neg	31	4125525	3047487	4.38083e+06	5.0795e+06	3.44694e+06	7.24814e+06	6060665	3.75107e+06	4.37536e+06	8.32192e+06	4.92617e+06	4.43345e+06	3.50114e+06	5289999	7537764	6843413	4.56842e+06	5.49151e+06	4746410	7.96759e+06	7.27097e+06	11300000	8135864
194.061	7.51768							-7.12482			cor-0'cor-5'cor-10'cor-20'cor-40'QC		0	bp		C7	xS34xC13	0.62	0.63	15000000	neg114	0			neg	31	1.73016e+06	5679626	4597012	2653300	2.34064e+06	8963146	7124931	2.11135e+06	5797546	11300000	4.18365e+06	3602417	5.13496e+06	5478267	4544652	7528781	8423829	3.41319e+06	4544412	3.97175e+06	5.36163e+06	9706059	11400000
194.061	6.81938										cor-0'cor-5'cor-10'cor-20'cor-40'QC		0	bp		C7	xC13xS34	0.2	0.55	14900000	neg115	0			negneg	31	7.30259e+06	5129478	6.77675e+06	11200000	11000000	2.74557e+06	6560914	6104641	2.87541e+06	1.74272e+06	4.18365e+06	3.88531e+06	6528229	5.06862e+06	4544652	2.85625e+06	4555927	6645671	8938239	3.14109e+06	3.26816e+06	3.30241e+06	6923430
194.061	6.14158				0.2			-7.13461			cor-0'cor-5'cor-10'cor-20'cor-40'QC		0	bp			xS34	0.39	0.39	14900000	neg116	0			negneg	31	5.29097e+06	6.84304e+06	7.72984e+06	7714382	7086439	7979661	7170854	6820827	5797546	11300000	5082350	5132310	9516866	3.76241e+06	9894954	7953292	8423829	7593056	9751534	5.32618e+06	7.42247e+06	9869135	11400000
339.754	22.7441										cor-0'cor-40		0	bp		C21	xC13	0.17	0.21	14700000	pos232	0			pos	31	10800000	9981337	12300000	12800000	13300000	10700000	11200000	9516220	10600000	9393489	11600000	10500000	13700000	12000000	6689115	10900000	10900000	8896583	13500000	11800000	14700000	12700000	10700000
161.957	31.6425										cor-0'cor-5'cor-10'cor-20'cor-40'QC		0	bp				0.19	0.29	14300000	neg119	0			neg	31	10500000	12000000	10100000	7.49548e+06	7.8364e+06	13100000	10900000	11300000	6006111	12900000	9150811	11300000	8930642	6.77076e+06	8010664	12800000	10600000	13400000	7.81485e+06	7.47799e+06	7.96356e+06	14100000	12000000
269.111	14.5873							-4.85948			cor-0'cor-10'cor-20'cor-40'QC		0	bp				0.47	0.86	14300000	pos235	0			pos	31	3.51837e+06	3.5137e+06	2.65481e+06	3.45206e+06	4195581	7.81145e+06	4237644	4.46592e+06	2193969	14300000	3166570	3.89352e+06	1.91244e+06	2.69565e+06	3.51365e+06	8043942	4826759	3.47125e+06	2.76959e+06	4.99091e+06	3845641	10400000	3.24735e+06
148.074	8.53835		0		0.4			0.647492	#N/A		cor-0'cor-5'cor-10'cor-20'cor-40	(R)-2,3-Dihydroxy-3-methylpentanoate	0	bp		-1.2	xC13	1.1	1.1	14100000	neg120	0		H	neg	31	2.10256e+06	3.169e+06	2626834	2.31183e+06	2.38246e+06	1.96396e+06	2.27416e+06	2161808	1.30626e+06	2.50802e+06	2.03302e+06	2.41976e+06	2.53448e+06	1.90105e+06	2.9103e+06	2.10836e+06	2.08102e+06	2.34719e+06	2.1602e+06	1.8966e+06	2240132	2.48603e+06	2249095
230.163	5.12669	C11H22N2O3	6	Valyl-Leucine	7	0	HMDB	0.165411	-37.1385		cor-0'cor-5'cor-10'cor-20'cor-40'QC	Valyl-Leucine	0	bp		-0.2	xK+xC13	0.11	0.23	14000000	pos237	0		H	pos	31	10000000	9313847	10700000	12700000	12300000	14000000	11800000	8869500	7.68192e+06	12600000	8640092	9290961	10700000	7245445	11200000	9197489	9224828	8515668	11400000	10500000	7656392	9994923	11100000
149.105	9.37927	C6H15NO3	1	Triethanolamine	7	0	KEGG_HMDB	-0.0591403	2.72437		cor-5'cor-10'cor-40'QC	Triethanolamine	0	bp		0	xC13	0.07	0.99	14000000	pos236	0		H	pospos	31	2.09866e+06	3.86219e+06	6.20706e+06	2.13613e+06	14000000	2.55658e+06	498570	3.65134e+06	6524997	3.06923e+06	1.16472e+06	4.23598e+06	3.2319e+06	8677818	1.69247e+06	5899639	873783	5433904	8.31739e+06	2.52961e+06	918041	766963	758711
363.058	16.1454	C10H14N5O8P	5	GMP	10	Yeastcyc	KEGG_Metacyc_HMDB	-0.219012	-0.398761		cor-0'cor-5'cor-10'cor-20'cor-40'QC	GMP	0	bp		1.2	xNa+xC13	0.02	0.55	13800000	pos239	0		H	posneg	31	11200000	12400000	8637739	4.86551e+06	10900000	7.49833e+06	6844944	10200000	4283238	7.55844e+06	4.66322e+06	10100000	12400000	3.18236e+06	9986267	7.17243e+06	6811099	13800000	7.85338e+06	2421469	5248053	5.57413e+06	6.22428e+06
174.137	21.2918	C8H18N2O2	1	Ne,Ne dimethyllysine	7	0	KEGG_HMDB	-0.104985	30.861		cor-0'cor-5'cor-10'cor-20'cor-40'QC	Ne,Ne dimethyllysine	0	bp		-0.3	xC13	0.23	0.45	13600000	pos241	0		H	pos	31	6434212	6786614	8417358	4.89569e+06	6057221	8082408	6.63518e+06	6854979	3777476	8487536	5120936	5617961	6480764	5.23009e+06	8498029	12200000	5.37274e+06	7623180	3.74691e+06	5578151	5161758	12000000	5.38317e+06
308.131	19.2116										cor-0'cor-5'cor-20'cor-40'QC		0	bp				0.2	0.92	13600000	pos242	0			pos	31	3.82297e+06	10900000	6.734e+06	8.05515e+06	3716275	3.84246e+06	1.69504e+06	4798300	1.0599e+06	1.79632e+06	995358	2.77371e+06	8844575	1.37921e+06	2.35205e+06	2.51354e+06	10100000	13000000	10200000	6.21188e+06	6.2945e+06	10600000	11400000
102.068	7.61615	C5H10O2	21	Pentanoate	9	0	KEGG_Metacyc_Lipidmaps_HMDB	-0.185043	-4.19938		cor-0'cor-5'cor-10'cor-20'cor-40'QC	Pentanoate	0	bp		1.6	xC13	0.31	0.38	13500000	neg121	0		H	neg	31	5.10351e+06	5258127	6533871	3.68068e+06	3.91338e+06	7289181	5692883	5643294	5.60394e+06	9186028	5503692	5.51147e+06	5704654	4617873	5892047	10700000	6157426	6.34942e+06	7158497	4.88305e+06	4.92608e+06	12000000	7.84157e+06
147.036	5.38399		0		3			0.760869	#N/A		cor-0'cor-5'cor-10'cor-20'cor-40'QC	Thiomorpholine 3-carboxylate	0	bp		-0.5	x-NH3xS34xC13	0.39	0.39	13500000	pos243	0		H	posneg	31	7.26179e+06	7.50855e+06	5166287	5.79865e+06	4581885	10400000	8956223	7528023	3925556	11100000	6248502	7.36135e+06	7.17797e+06	4385112	6.85186e+06	8036766	4890022	3.95413e+06	9863244	5279759	8579506	8399505	9573221
189.1	5.62061	C8H15NO4	6	2 -(Butylamido)-4-hydroxybutanoic acid	7	0	KEGG_Metacyc	0.351431	-48.1947		cor-5'cor-20'cor-40'QC	2 -(Butylamido)-4-hydroxybutanoic acid	0	bp		-0.6	xC13xK+	0.09	0.59	13300000	pos245	0		H	posneg	31	4.54939e+06	6885775	304039	4328548	5571251	9665023	7821050	5.60712e+06	4.47812e+06	10900000	4668597	6174510	7.12804e+06	5.70446e+06	353981	8570620	7442015	6804732	6.4994e+06	5.483e+06	5220885	11900000	8604718
196.058	13.4301	C6H12O7	11	D-Gluconic acid	9	0	KEGG_Metacyc_HMDB	-0.144838	0.374768		cor-0'cor-5'cor-10'cor-20'cor-40'QC	D-Gluconic acid	0	bp		0	xC13xO18	0.08	0.69	13200000	neg122	0		H	neg	31	6729026	7.50471e+06	11900000	3.61208e+06	6.87503e+06	2.91161e+06	4777635	7440132	4.08285e+06	3.38268e+06	8.28675e+06	6301678	6507992	5588749	10300000	4796943	5598307	13200000	2.39257e+06	7.81685e+06	4530044	3.35614e+06	3270124
191.062	5.18731		0		3			0.214569	#N/A		cor-0'cor-5'cor-10'cor-20'cor-40	N-Acetylmethionine	0	bp		-0.1	xC13x-H2OxS34xK+	0.68	0.68	13200000	pos246	0		H	pos	30	4867259	5934295	4.31862e+06	9253021	5.12991e+06	8904224	5266850	5516970	3.52279e+06	7616922	2.78586e+06	7.42922e+06	7.73065e+06	2.20971e+06	6.22478e+06	6.41791e+06	5030688	5.63735e+06	7.66168e+06	2.93453e+06	5569860	9478393	6.29503e+06
133.074	6.98127	C5H11NO3	7	3-nitro-2-pentanol	7	0	Metacyc	0.146489	-9.79774		cor-0'cor-10'cor-40'QC	3-nitro-2-pentanol	0	bp				0.31	1.43	13100000	pos247	0		H	pos	31	1.44455e+06	1620371	1.32797e+06	1.84665e+06	2216608	5571440	1.71093e+06	1.42289e+06	965723	6.8557e+06	1.19665e+06	1.3752e+06	2.46686e+06	1463266	2.06849e+06	1.02766e+06	1.40177e+06	1.08035e+06	1426902	1.28618e+06	1.75982e+06	13100000	1.348e+06
136.052	4.62028	C8H8O2	23	4-Hydroxyphenylacetaldehyde	7	0	KEGG_Metacyc_HMDB	0.063661	-41.3829		cor-10'cor-20'QC	4-Hydroxyphenylacetaldehyde	0	bp				0.16	1.86	13000000	neg123	0		H	neg	31	523195	383895	1.09801e+06	712877	530046	13000000	5619993	416664	3.92741e+06	13000000	574636	585349	832209	388288	587264	118943	460379	597712	661086	474799	416108	237230	1.00347e+06
228.147	5.39083		0		0.2			0.375696	#N/A		cor-0'cor-5'cor-10'cor-20'cor-40	L-isoleucyl-L-proline	0	bp		1.5	xK+xC13	0.68	0.68	13000000	pos248	0		H	pos	30	9743222	3.1021e+06	7.4179e+06	8584914	8.37121e+06	2668351	9236110	10100000	5631099	10500000	6.45814e+06	3.29624e+06	4.00786e+06	1.59885e+06	3.15006e+06	2.82881e+06	8.20086e+06	7.95773e+06	9364097	7372340	7.42517e+06	7618977	10100000
743.463	4.05681										cor-0'cor-5'cor-10'cor-20'cor-40'QC		0	bp		C36	xC13	0.35	0.44	12800000	pos250	0			pos	31	4605719	6.48926e+06	7011426	4.27515e+06	6.58444e+06	12800000	8.27351e+06	4768364	5.06408e+06	11400000	5248567	7178034	6.36338e+06	5658905	6.43269e+06	771908	5130986	6.35794e+06	6716031	5.73991e+06	4884887	772165	6.59262e+06
767.116	13.1061	C21H36N7O16P3S	1	CoA	8	Yeastcyc	KEGG_Metacyc_HMDB	0.664977	0		cor-0'cor-5'cor-10'cor-20'cor-40'QC	CoA	0	bp		2.8	x2+xC13	0.11	0.28	12700000	pos251	0		H	pos	31	6185305	8.33853e+06	6.35467e+06	11100000	7276095	11600000	8603059	7.48802e+06	6.67132e+06	10100000	6067990	8867397	7419540	4896521	8636862	9988834	6128410	7.65926e+06	9936537	5.79754e+06	9587817	10500000	6893897
136.019	9.5903	C4H8O3S	1	S-Methyl-1-thio-D-glycerate	7	0	KEGG_Metacyc	0.013071	17.5352		cor-0'cor-5'cor-10'cor-20'cor-40'QC	S-Methyl-1-thio-D-glycerate	0	bp		0.5	xC13xS34x-H2O	0.12	0.34	12600000	pos253	0		H	pospospos	31	4.58641e+06	6.44484e+06	8841723	5400183	4.533e+06	6044169	4.44258e+06	4296455	3.65514e+06	7.38957e+06	4.80908e+06	4.65274e+06	5.87897e+06	3.86127e+06	6195777	6049841	5.47446e+06	8408189	4.44842e+06	5.02041e+06	4.03066e+06	7909114	6256541
260.03	15.5409	C6H13O9P	45	Hexose phosphate	8	Yeastcyc	KEGG_Metacyc	-0.118824	-9.22969		cor-0'cor-5'cor-10'cor-20'cor-40'QC	Hexose phosphate	0	bp				0.09	0.68	12500000	neg127	0		H	negpos	31	2.98126e+06	2.474e+06	6809105	4.02702e+06	4.30794e+06	5964969	1.38792e+06	4.61797e+06	3466964	5155980	1.43836e+06	7.97768e+06	11100000	1.08351e+06	5.94263e+06	9834312	3776508	10500000	5475478	2.19364e+06	3.29774e+06	9118304	2.96909e+06
158.058	7.57253		0		0.4			0.12817	#N/A		cor-0'cor-5'cor-10'cor-20'cor-40	2-Isopropylmaleate	0	bp				1.66	1.66	12500000	neg125	0		H	neg	31	386102	207528	287876	177228	318975	593998	200276	168605	171378	242540	223213	296824	194386	209473	227551	246594	204150	200699	108999	267176	199980	199021	285790
237.868	30.3795										cor-0'cor-5'cor-10'cor-20'cor-40'QC		0	bp				0.26	0.39	12500000	neg126	0			neg	31	6.66177e+06	8236288	6.39987e+06	4712207	5.09082e+06	9231109	7.82636e+06	8508825	4244203	10400000	6118635	7.53486e+06	5897777	4.39397e+06	6115688	11000000	6.91552e+06	9798304	4.95008e+06	4800079	4826582	11100000	7.98696e+06
113.084	6.05782		0		4.5			0.417858	#N/A		cor-0'cor-5'cor-10'cor-20'cor-40'QC	epsilon-Caprolactam	0	bp		0.2	xC13	0.08	0.72	12200000	pos258	0		H	pos	31	3902019	4.0958e+06	3.0942e+06	4.89657e+06	2.07707e+06	3.93805e+06	8580624	5.12608e+06	6248966	3.97681e+06	4.79027e+06	4347789	6.41266e+06	3025358	5.63941e+06	4.67764e+06	4.57998e+06	3.19062e+06	2.16866e+06	6606635	2.59683e+06	12200000	4.98556e+06
113.084	5.71104		0		4.5			0.468263	#N/A		cor-0'cor-5'cor-10'cor-20'cor-40'QC	epsilon-Caprolactam	0	bp		0.2	xC13	0.08	0.66	12200000	pos259	0		H	pos	31	3902019	4.0958e+06	3.0942e+06	4.89657e+06	2.07707e+06	4.86771e+06	8580624	5.12608e+06	6248966	3.97681e+06	4.79027e+06	5251398	6.41266e+06	3.42256e+06	5.63941e+06	4.67764e+06	4.57998e+06	3.19062e+06	2.37676e+06	9615855	4.10997e+06	12200000	4.98556e+06
678.504	8.74237										QC		0	bp				0.11	0.17	12200000	pos257	0			pos	31	9180605	8323974	8475650	9383001	8599541	9025902	9721962	8644619	11500000	10400000	7.62701e+06	8791502	10100000	10100000	12200000	10400000	7466190	10200000	11000000	11000000	8518921	7.82041e+06	7.32448e+06
96.0324	7.69334										cor-0'cor-5'cor-10'QC		0	bp				0.19	0.83	12000000	pos260	0			posneg	31	7.93168e+06	6639086	12000000	1.33583e+06	8449290	1.17019e+06	3332193	5844150	3.34799e+06	2.27715e+06	8422784	3.28244e+06	3.10095e+06	8950314	7.42605e+06	2.69213e+06	5.48441e+06	7483392	835913	8095817	1.8593e+06	992219	5.12778e+06
616.721	20.7089										QC		0	bp		C55	xNa+xC13	0.17	1.9	12000000	pos261	0			posneg	30	441678	717380	848407	0	300056	9837948	3698458	1.43656e+06	245135	12000000	692692	1.04318e+06	347028	657090	2.18296e+06	10200000	325205	2178751	128210	530880	927435	7751607	236325
258.183	4.40996	C14H26O4	10	FA methyl(15:0) tridecanedioic acid	7	0	Lipidmaps	-0.00107525	-18.4614		cor-0'cor-5'cor-20'cor-40'QC	FA methyl(15:0) tridecanedioic acid	0	bp		0.8	xC13	0.14	1.05	11800000	neg129	0		H	neg	31	3.06881e+06	6.90852e+06	7.64463e+06	7069569	5078305	328363	2.19818e+06	1.28618e+06	3.3339e+06	1991253	1.2367e+06	3.52843e+06	4536142	1.3787e+06	11800000	1.07605e+06	4.00324e+06	1.50066e+06	1.57898e+06	5762161	272856	2.98145e+06	3.07318e+06
93.9223	29.1867										cor-0'cor-5'cor-10'cor-20'cor-40'QC		0	bp				0.18	0.4	11800000	pos264	0			pos	31	7045259	9361530	7.06345e+06	5625890	5.83005e+06	10400000	7069556	7.32366e+06	4.01887e+06	11200000	6545208	7968556	6.92831e+06	4843390	6941708	10700000	6869449	9345441	5936352	4882985	5787152	11000000	8620146
190.172	4.7735		0		0.2			0.00782713	#N/A		cor-0'cor-5'cor-10'cor-20'cor-40'QC	3,5,7-Trimethyl-2E,4E,6E,8E-undecatetraene	0	bp				0.67	0.67	11800000	pos263	0		H	pos	31	3.53721e+06	7068148	6968345	10400000	8023404	4.73162e+06	4926913	6.57861e+06	9183869	7.10182e+06	4.1181e+06	8433146	866735	3.94039e+06	1.71941e+06	5170930	7.46895e+06	7917363	11800000	5998125	1.61915e+06	7.43464e+06	5.63459e+06
444.282	4.85906		0		3			1.47393	#N/A		cor-5	Ala-Lys-Ala-Arg	0	bp				0.68	1.48	11600000	pos265	0		H	pos	28	698776	825748	1.2559e+06	486107	992860	0	1.11542e+06	1.12846e+06	1260679	45954.2	8318504	863235	1.16547e+06	1.7336e+06	833146	93075.8	473742	769332	1.01411e+06	4107256	11600000	104718	1.19263e+06
254.09	23.4262	C11H14N2O5	5	nicotinamide riboside	8	Yeastcyc	Metacyc_HMDB	-0.312649	4.38135		cor-0'cor-5'cor-10'cor-20'cor-40'QC	nicotinamide riboside	0	bp		-0.5	xC13xC13	0.1	0.31	11500000	pos267	0		H	posneg	31	5.91748e+06	4.02032e+06	7.53428e+06	7.05176e+06	8080431	7965877	8.20503e+06	6458614	3915035	8566419	7046871	6.74658e+06	6945224	5525810	9138091	6.42491e+06	5.92569e+06	6.31734e+06	5.84726e+06	5135213	6.47647e+06	7.6754e+06	8422844
277.565	17.1225										cor-0'cor-5'cor-10'cor-20'cor-40'QC		0	bp		C20	x2-merxC13	0.23	0.53	11500000	pos266	0			pos	31	3.94938e+06	5.12186e+06	6455418	3.32416e+06	4734201	6800501	6.6244e+06	4.96084e+06	1.98526e+06	7264576	5393793	4.87412e+06	2.30385e+06	4.5275e+06	5404299	6.50164e+06	5271250	6.64295e+06	1.81812e+06	5.60867e+06	4895120	11500000	4295205
443.024	17.2955	C10H15N5O11P2	2	GDP	10	Yeastcyc	KEGG_Metacyc_HMDB	0.0835633	-0.0835808		cor-0'cor-5'cor-10'cor-20'cor-40'QC	GDP	0	bp		1.3	xNa+xC13	0.04	0.31	11400000	pos268	0		H	pos	31	7886006	7664554	5.27741e+06	5.22063e+06	6640309	11400000	9997336	8.15357e+06	5.29963e+06	10600000	5.65754e+06	5981834	5.60839e+06	4564354	8.1054e+06	9542960	5940294	6839550	6.78476e+06	4.68121e+06	7.54587e+06	9667755	5.731e+06
409.334	4.83743										cor-5'cor-10'QC		0	bp				0.29	0.95	11400000	pos269	0			pos	31	4.89075e+06	2.8919e+06	11400000	1.08011e+06	4819820	212480	3.02333e+06	4.678e+06	7298744	165911	4.36931e+06	7.55243e+06	4.96488e+06	5880684	5.10362e+06	180185	5.82218e+06	7.38827e+06	1.10964e+06	6941499	2.07722e+06	195321	6544669
479.301	4.56165	C23H46NO7P	8	LysoPE(18:1)	7	0	Lipidmaps	0.368311	12.3124		cor-0'cor-5'cor-10'cor-20'cor-40'QC	LysoPE(18:1)	0	bp		-0.3	xC13	0.29	0.5	11300000	pos271	0		H	posnegposneg	31	7.13482e+06	7129124	6.99736e+06	7.81791e+06	6.55884e+06	6.35573e+06	7430937	7658712	6776501	4816904	5.38156e+06	9173737	9701114	5.46959e+06	10000000	2.3878e+06	7.02542e+06	7.24937e+06	7.41482e+06	5.06131e+06	8881376	2.11288e+06	5370146
386.242	7.58407										cor-0'cor-5'cor-10'cor-20'cor-40'QC		0	bp		C22	xC13	0.21	0.21	11300000	neg131	0			neg	31	8067851	9670237	7543552	6.48964e+06	8328478	6.70937e+06	6951351	7084669	8.33916e+06	7.34677e+06	6719160	7.21525e+06	7.8602e+06	9000493	7963677	7423849	8994575	7527291	7.61957e+06	7.70348e+06	6215915	6.60892e+06	11300000
767.487	4.62123				0.4						cor-0'cor-5'cor-20'cor-40		0	bp		C42	xC13	0.92	0.92	11300000	pos270	0			pos	31	3.1481e+06	6.62746e+06	4360634	2.62885e+06	3.78768e+06	11300000	4.37963e+06	4862034	3.76213e+06	8.35602e+06	80994.4	6531864	5.1915e+06	2.54917e+06	2.66961e+06	1.01487e+06	6.13226e+06	7.48642e+06	5.56142e+06	159235	3.80499e+06	436813	6.63631e+06
340.255	14.8399		0		0.1			1.39039	#N/A		cor-0'cor-5'cor-10'cor-20'cor-40'QC	5S,12R-dihydroxy-6Z,8E,10E,14Z-eicosatetraenoic acid-d4	0	bp	xC13			0.07	0.16	11200000	pos272	0		H	pos	31	8213044	8303821	8581552	9918352	10100000	9067459	9173829	9032796	10700000	9687719	8802090	10500000	10500000	10100000	8626462	10200000	8700772	7.504e+06	11200000	8.22657e+06	10200000	8249919	8.33387e+06
244.204	4.10683	C14H28O3	12	2S-Hydroxytetradecanoic acid	7	0	KEGG_Metacyc_Lipidmaps_HMDB	0.000985271	-10.8767		cor-0'cor-5'cor-10'cor-40'QC	2S-Hydroxytetradecanoic acid	0	bp		1.2	x-H2OxC13	0.37	0.84	11100000	neg134	0		H	neg	31	4259636	5358644	5.95051e+06	4788230	4.04116e+06	3.37185e+06	5.5714e+06	3.7652e+06	3.37923e+06	3195497	3379277	3.64585e+06	4.10755e+06	3.31454e+06	4.68612e+06	1084344	11100000	4388019	3.33149e+06	2.7001e+06	2.64793e+06	1.16682e+06	3.21181e+06
130.099	4.80806	C7H14O2	34	FA methyl(6:0)	7	0	Lipidmaps	0.759342	-36.0033		cor-0'cor-5'cor-10'cor-20'cor-40'QC	FA methyl(6:0)	0	bp				0.58	0.75	11000000	neg136	0		H	neg	31	3.63958e+06	4300593	11000000	2.25712e+06	4.04953e+06	1.60876e+06	1765301	3.60902e+06	4.06888e+06	1.60393e+06	4.12344e+06	4.07882e+06	4405617	5019827	5.48989e+06	1.68542e+06	3160307	6.27439e+06	2.44575e+06	4262126	2.09493e+06	2.67663e+06	2.77544e+06
400.087	9.76761										cor-0'cor-5'cor-10'cor-20'cor-40'QC		0	bp		C14	xK+xO18xC13	0.68	0.68	11000000	neg137	0			neg	31	4.55355e+06	4640500	4346342	4.17129e+06	3.20889e+06	4.37967e+06	4914486	3.00993e+06	2.50462e+06	4241538	3.7732e+06	3.882e+06	4785926	3.66012e+06	5.61401e+06	5152168	2606679	4.63022e+06	6158700	3.22296e+06	3.66157e+06	7520501	5.51763e+06
678.505	12.8376										cor-0'cor-5'cor-10'cor-40		0	bp				0.17	0.18	11000000	pos273	0			pos	31	8571804	8883362	11000000	9826108	10600000	9737950	8056145	6.88408e+06	10300000	8418093	7.73044e+06	7222575	8461889	9320188	8644921	9301656	6753012	9710742	9313623	8610530	8566858	7.41373e+06	6.97818e+06
211.088	9.3969										cor-0'cor-10'cor-20		0	bp				0.28	0.28	10900000	pos274	0			pos	31	8384553	8900864	8143052	9404856	8.21996e+06	9233163	9696743	8707399	6.9814e+06	8794501	8500272	8712679	9574273	7.97571e+06	8550076	8.29597e+06	8362342	7.38838e+06	10900000	9114674	9008028	9672172	7594247
515.336	7.78233				0.2						cor-5'cor-10'cor-20'cor-40'QC		0	bp				0.24	0.89	10900000	neg139	0			negneg	31	1.26623e+06	1.28307e+06	1.33544e+06	5.70248e+06	1.44872e+06	1.15982e+06	6.24324e+06	6117953	9153502	6.5294e+06	5.91696e+06	6048016	9835686	6967990	9648774	6.03527e+06	6.46141e+06	6411223	10100000	7321650	7718287	10200000	7.8171e+06
678.883	7.7304				0.4						cor-0'cor-5'cor-10		0	bp		C27	xC13	0.88	0.88	10900000	neg138	0			neg	30	5.88592e+06	5.05849e+06	3.91016e+06	3.43339e+06	3.79855e+06	714212	7326637	10900000	3.97606e+06	788072	3.82842e+06	8827225	5310026	1.75131e+06	9521902	143381	2.94489e+06	9801390	7307633	2652551	6081821	0	2.94699e+06
237.868	31.1637										cor-0'cor-5'cor-10'cor-20'cor-40'QC		0	bp				0.27	0.34	10800000	neg140	0			neg	31	5.7838e+06	6622438	4977361	4.61248e+06	4.23521e+06	7410212	6.10079e+06	6576869	3.80812e+06	9026380	5.17355e+06	6605123	4.49947e+06	3784488	5.08937e+06	8473522	5575658	7674669	4786936	4158912	4.51874e+06	8899686	6.48883e+06
515.333	9.17038										cor-0'cor-5'cor-10'cor-20'cor-40'QC		0	bp		C25	xC13	0.23	0.29	10700000	neg141	0			neg	31	9170794	7.55662e+06	9244721	8503454	9597624	7.22926e+06	4.5284e+06	7.8372e+06	9189544	7.8937e+06	4528215	8558403	7576159	5.10429e+06	8703291	7736932	5746098	7.44852e+06	10700000	5.91018e+06	6949946	5114135	6751680
254.152	4.33162										cor-5'cor-10'cor-20'cor-40'QC		0	bp		C14	xC13x-CO2	0.27	0.83	10500000	neg143	0			neg	31	2.81528e+06	2.61307e+06	10500000	4.82858e+06	2490541	1.05661e+06	2.45862e+06	2.81852e+06	5021366	1.11016e+06	2207691	5.66096e+06	6.09528e+06	2059130	3635166	1.06928e+06	1845652	5871846	4.06878e+06	2.22512e+06	2.04555e+06	2488735	2.92006e+06
256.106	9.18413	C11H16N2O5	1	1-(beta-D-Ribofuranosyl)-1,4-dihydronicotinamide	7	0	KEGG_Metacyc_HMDB	-0.405878	-1.21834		cor-0'cor-5'cor-10'cor-20'cor-40'QC	1-(beta-D-Ribofuranosyl)-1,4-dihydronicotinamide	0	bp				0.1	0.35	10400000	pos281	0		H	posneg	31	3.6078e+06	4466274	3.57252e+06	4.44255e+06	4709739	5949568	5.49135e+06	4207075	2.69973e+06	6171464	2.89922e+06	4581416	4455068	2.85279e+06	4.6997e+06	5106886	3.60201e+06	4.13653e+06	4995469	3.12986e+06	4.88496e+06	6071634	6.68747e+06
113.084	6.58957		0		4.5			0.302015	#N/A		cor-0'cor-5'cor-10'cor-20'cor-40'QC	epsilon-Caprolactam	0	bp				0.08	0.75	10300000	pos283	0		H	pos	31	3.02762e+06	2.69008e+06	2.21762e+06	4020001	1.79316e+06	3517517	6753124	3.3186e+06	5.19967e+06	2.3633e+06	3.43491e+06	3.02089e+06	3.31645e+06	2.63233e+06	3.70933e+06	3.52893e+06	3.33238e+06	2.46988e+06	1.65397e+06	6719498	2458721	10300000	3.16968e+06
245.149	16.1793		0		0.2			0.126554	#N/A		cor-0'cor-5'cor-10'cor-20'cor-40'QC	beta-Alanyl-L-arginine	0	bp				0.35	0.35	10100000	pos285	0		H	pos	31	6857958	6546686	5775039	5567219	5410039	7.38524e+06	9643880	6950317	5.03064e+06	6.18634e+06	7.75184e+06	5693598	7.82827e+06	6.26461e+06	7.09069e+06	7138319	3499356	5.3543e+06	7.11544e+06	6454440	4788419	6558202	10100000
600.328	4.44104	C27H53O12P	1	[PI(18:0)] 1-octadecanoyl-sn-glycero-3-phospho-(1'-myo-inositol)	7	0	Lipidmaps	0.115448	9.93109	0.648492	cor-0'cor-5'cor-10'cor-20'cor-40	[PI(18:0)] 1-octadecanoyl-sn-glycero-3-phospho-(1'-myo-inositol)	0	bp		0.6	xC13	0.73	0.8	10000000	neg145	0		H	neg	30	3.25655e+06	1.9934e+06	2.56545e+06	2.61274e+06	2.49676e+06	10000000	3845618	2.82187e+06	2.62738e+06	8997302	2284006	2292967	2898117	1.9611e+06	3.27717e+06	3.48675e+06	2218104	3.66677e+06	3.03496e+06	1525953	2.60461e+06	3.57068e+06	1.98313e+06
218.127	8.18775	C9H18N2O4	14	Ile-Ser	7	0	Peptides	-0.292133	-43.2781		cor-0'cor-5'cor-10'cor-20'cor-40'QC	Ile-Ser	0	bp		-3.2	xC13	0.6	0.6	9761780	pos287	0		H	posposneg	31	4476185	3.48333e+06	4.26025e+06	4.83335e+06	5.35415e+06	3.90414e+06	4722972	4631882	2.6958e+06	4940342	5.04536e+06	3233718	4.83932e+06	3024795	6.61359e+06	3.86548e+06	4920533	6147421	3705308	4.17853e+06	3176275	3.97456e+06	4672167
524.246	3.76262				0.1			-4.05294			cor-0'cor-5'cor-10'cor-20'cor-40'QC		0	bp	xK+	C31	xC13	0.53	0.6	9721946	pos290	0			pos	31	4.29122e+06	4616010	4687221	2.46041e+06	2365856	8703512	6845581	9721946	3500891	6.7723e+06	176178	3.96328e+06	3072767	3.17136e+06	3.68287e+06	4.85208e+06	5488612	4.94222e+06	2.75494e+06	111069	7.19416e+06	3.93506e+06	6496709
136.053	7.63655	C8H8O2	23	Phenylacetic acid	9	0	KEGG_Metacyc_HMDB	0.708999	-4.54307		cor-0'cor-5'cor-10'cor-20'cor-40'QC	Phenylacetic acid	0	bp		-1.6	xC13	0.13	0.75	9630554	neg148	0		H	neg	31	3.17768e+06	2997401	8384103	3980452	2287755	2.49191e+06	2.5174e+06	3.53356e+06	9630554	2.52108e+06	3268268	4.37191e+06	6890649	3467214	2348937	2009186	3.92876e+06	3.85933e+06	4535165	3.23557e+06	2.67863e+06	3.64467e+06	4.15821e+06
156.017	11.694		0		4			-0.193057	#N/A		cor-0'cor-5'cor-10'cor-20'cor-40'QC	Orotate	0	bp				0.47	0.47	9496145	pos292	0		H	pos	31	4.01526e+06	4175525	7117267	6.90556e+06	4753737	3.4468e+06	2.34607e+06	5755046	5072571	4579810	4278092	4646564	8348585	4723487	3.36331e+06	3302771	4.42608e+06	4836071	6.89366e+06	4929602	4.60803e+06	4.93882e+06	6300662
163.048	14.3152		0		0.2			-0.267629	#N/A		cor-0'cor-5'cor-10'cor-20'cor-40'QC	L-erythro-4-Hydroxyglutamate	0	bp				0.08	0.27	9466464	neg149	0		H	neg	31	7672537	7.43488e+06	7.01144e+06	7.29667e+06	7324589	6555173	6.44231e+06	6401334	5.19551e+06	7.25179e+06	5049600	6.34889e+06	8094839	5.49796e+06	9040504	7.17848e+06	6478412	9466464	4589052	5.57269e+06	7034959	5.25886e+06	6091533
144.115	4.58287	C8H16O2	50	FA (8:0) octanoic acid	9	0	KEGG_Metacyc_Lipidmaps_HMDB	0.345417	0.722426		cor-0'cor-5'cor-10'cor-20'cor-40'QC	FA (8:0) octanoic acid	0	bp		-0.4	xC13	0.6	0.6	9370496	neg150	0		H	neg	31	2.85583e+06	2.90867e+06	5263975	2892933	2.73533e+06	2.52952e+06	3803386	2.92039e+06	3.96363e+06	3066407	2821272	3370136	4.41969e+06	2.8139e+06	4.74611e+06	3.38285e+06	3.22557e+06	4.0572e+06	3.17381e+06	3.96526e+06	2.75086e+06	3191270	3.40181e+06
189.1	5.97084	C8H15NO4	6	2 -(Butylamido)-4-hydroxybutanoic acid	7	0	KEGG_Metacyc	0.192785	-39.5021		cor-0'cor-5'cor-10'cor-20'cor-40'QC	2 -(Butylamido)-4-hydroxybutanoic acid	0	bp				0.4	0.42	9359427	pos294	0		H	posnegneg	31	4.54939e+06	6885775	6.43784e+06	4328548	5571251	4377009	1.64587e+06	1.93759e+06	4.09396e+06	2.96002e+06	4668597	6174510	7.12804e+06	2909293	5.42117e+06	3.75123e+06	1.66671e+06	1806315	2.74664e+06	3.17455e+06	3.66148e+06	4835998	5.77075e+06
179.079	13.4074		0		0.1			0.0360548	#N/A		cor-0'cor-5'cor-10'cor-20'cor-40'QC	D-Glucosamine	0	bp	x-H2O		x-FAx-NH3	0.16	0.51	9319726	pos295	0		H	pos	31	3.10192e+06	3.26521e+06	2.72501e+06	1.41575e+06	3181270	4.78561e+06	5438181	3.16649e+06	3725194	9319726	2.66646e+06	4.26036e+06	3.85042e+06	2.42684e+06	4.20584e+06	5554526	4236969	3.34496e+06	4.13063e+06	2.78704e+06	4547523	6421741	3.9263e+06
615.507	4.11485										QC		0	bp				0.14	1.88	9255424	pos297	0			pos	22	2.63374e+06	3.72501e+06	9255424	0	4410668	0	246833	2.89213e+06	2.02384e+06	0	6045430	2221781	3.22912e+06	5.21509e+06	4783502	0	2.20249e+06	5815308	0	3.49356e+06	980263	0	846816
203.127	16.5922	C8H17N3O3	3	Lys-Gly	7	0	Peptides	0.0511183	-13.4331		cor-0'cor-5'cor-10'cor-20'cor-40'QC	Lys-Gly	0	bp		-0.3	xC13	0.12	0.28	9220833	pos298	0		H	pos	31	5255870	5.29151e+06	5.26368e+06	4.40019e+06	5.46687e+06	7.41406e+06	6022773	5423408	4734329	7617518	4.759e+06	4985485	6027852	4794617	7196500	7.7538e+06	4.66184e+06	6565791	5561704	4860255	5.56351e+06	9220833	5502332
149.051	12.3714		0		0.2			0.142518	#N/A		cor-0'cor-5'cor-10'cor-20'cor-40'QC	D-Methionine	0	bp				0.4	0.62	9201288	pos299	0		H	pos	31	5.51312e+06	6071380	4679559	6.5855e+06	5.97428e+06	8.21092e+06	3.34483e+06	2.9531e+06	3.5819e+06	9201288	4.66095e+06	8228060	6031316	4244401	6.05003e+06	6500141	5.61129e+06	4249827	6702480	4.35873e+06	4.85834e+06	7.49236e+06	6281773
161.051	5.86597		0		0.4			0.660565	#N/A		cor-0'cor-5'cor-10'cor-20'cor-40	trans-S-(1-Propenyl)-L-cysteine	5e-07	bp				1.25	1.25	9184153	pos300	0		H	pospos	31	1.2603e+06	1.20223e+06	1.63579e+06	1.5598e+06	1.19922e+06	2.15142e+06	611126	1.19732e+06	726244	1.14314e+06	1346584	1.33886e+06	1.35756e+06	1.06537e+06	2.28137e+06	1.46519e+06	1.21074e+06	1.10711e+06	1.29086e+06	954605	1.34424e+06	2104690	1228104
210.056	8.36405	C8H18S3	2	Ethyl 1-(propylthio)propyl disulfide	ppm	0	HMDB	-4.0864	46.0833		cor-0'cor-5'cor-10'cor-20'cor-40'QC	Ethyl 1-(propylthio)propyl disulfide	0	bp				0.51	0.51	9044595	neg151	0		H	neg	31	3.3946e+06	3.22462e+06	4836097	2.27143e+06	1.23769e+06	2.15923e+06	2.60354e+06	2.5567e+06	1.99389e+06	2.03489e+06	3.00118e+06	2.03169e+06	3.58423e+06	2.96875e+06	5.90173e+06	2.79663e+06	3211481	4.81828e+06	3.13463e+06	4.16603e+06	2.98612e+06	4543437	3.70595e+06
515.335	8.45366				0.4						cor-5'cor-40		0	bp				1.21	1.21	9012221	neg152	0			neg	31	1.2207e+06	1.58057e+06	1.33544e+06	1.43407e+06	1.41092e+06	1.41011e+06	1419139	1.53177e+06	2.16465e+06	2.32503e+06	1.28279e+06	1642035	1.66181e+06	1.57582e+06	1616628	2753599	1.34468e+06	1.56038e+06	1.40506e+06	1511743	1.46749e+06	1.50383e+06	1.66518e+06
103.1	20.5266	C5H13NO	2	Choline	10	Yeastcyc	KEGG_Metacyc_HMDB	-0.0610764	-0.645571		cor-0'cor-5'cor-10'cor-40'QC	Choline	0	bp		1	xC13	0.05	0.86	8993397	pos302	0		H	pos	31	2.80153e+06	2682887	7854598	3.54375e+06	5.15573e+06	3.30463e+06	1.1624e+06	4498463	6321585	3.07678e+06	914807	5.55504e+06	7196599	433090	3242462	7.18011e+06	1.35026e+06	4.41384e+06	8993397	721328	1.31562e+06	5.99467e+06	1.55152e+06
452.336	10.7446										cor-0'cor-5'cor-10'cor-20'cor-40'QC		0	bp		C25	xC13xClxCl	0.14	0.19	8905325	neg154	0			neg	31	5834576	6471951	6535041	7.89838e+06	7.56254e+06	6585589	6.30427e+06	6959383	7530884	5718614	6.3971e+06	7645863	8537842	7809307	7.96487e+06	6.4521e+06	5728807	5.78352e+06	8905325	7673517	8542776	6.80151e+06	6422424
342.116	18.086	C12H22O11	47	Maltose	8	Yeastcyc	KEGG_Metacyc_HMDB	0.319943	28.9313		cor-0'cor-5'cor-10'cor-20'cor-40'QC	Maltose	0	bp		0.6	x2-merxC13xK+xO18	0.05	0.17	8799876	neg157	0		H	neg	31	6290839	7.70707e+06	7378877	6.49806e+06	7162329	6.62163e+06	6.37227e+06	5.95654e+06	4324133	6.34983e+06	5496476	6082986	7744892	6396444	8.02171e+06	5975068	6.70409e+06	6807498	6867952	5378534	7.48244e+06	6101377	6812807
314.052	14.7342	C8H15N2O9P	1	5'-Phosphoribosyl-N-formylglycinamide	8	Yeastcyc	KEGG_Metacyc_HMDB	0.374426	-2.31858	1.36153	cor-0'cor-5'cor-10'cor-20'cor-40'QC	5'-Phosphoribosyl-N-formylglycinamide	0	bp		0.6	xC13	0.11	0.27	8775865	neg158	0		H	negpos	31	7229108	6181467	7.37662e+06	6898815	6892875	7023809	6519370	5879991	4.55535e+06	8775865	4.94978e+06	5.47169e+06	6905538	5.17448e+06	8342574	7.65713e+06	4.82794e+06	5.19976e+06	5.64196e+06	5155472	5736683	6687366	4.04179e+06
111.983	7.80453		0		0.4			0.395997	#N/A		cor-0'cor-5	Monomethyl sulfate	0	bp				0.91	1.77	8755317	neg159	0		H	neg	31	389062	544534	1.36244e+06	440912	426197	188211	291536	502757	852853	227883	789276	658663	8755317	587020	395409	217591	434227	1.03464e+06	367677	7.43723e+06	453156	182383	3.64257e+06
500.995	17.1547										cor-0'cor-5'cor-10'cor-20'cor-40'QC		0	bp		C11	x-NH3xC13	0.05	0.32	8638168	pos306	0			pos	31	1908763	1587966	2.06345e+06	3.13597e+06	2.04565e+06	3.53431e+06	3.27573e+06	2.13039e+06	2.52191e+06	3346302	2.90739e+06	2.5645e+06	1.99448e+06	2.89911e+06	3.9039e+06	3.32518e+06	3.01073e+06	2811488	2.60886e+06	4384766	4.35453e+06	4868164	3856587
403.018	16.4622	C9H15N3O11P2	1	CDP	9	0	KEGG_Metacyc_HMDB	0.149206	0.0743818		cor-0'cor-5'cor-10'cor-20'cor-40'QC	CDP	0	bp		0.5	x2+xC13xO18	0.08	0.3	8567313	neg161	0		H	neg	31	3.14178e+06	3.24055e+06	2.76744e+06	2.71659e+06	3130348	5024431	4.49486e+06	3.75722e+06	2.40422e+06	5156585	2.88634e+06	3.29297e+06	3.68182e+06	2.64623e+06	4703831	5130904	3492834	5.16236e+06	3615904	3.55875e+06	4763050	5.51185e+06	4370781
176.043	16.138	C5H8N2O5	3	N-Carbamoyl-L-aspartate	8	Yeastcyc	KEGG_Metacyc_HMDB	0.0507872	10.8716		cor-0'cor-5'cor-10'cor-20'cor-40'QC	N-Carbamoyl-L-aspartate	0	bp		0	x2-merxC13	0.05	0.48	8539885	neg162	0		H	negpos	31	5082622	6.13676e+06	7.51982e+06	6472487	2.749e+06	2.27838e+06	7652311	7128592	5.3722e+06	2.21619e+06	4.82208e+06	6500957	8539885	4.75923e+06	3.01713e+06	1.94754e+06	5123619	5.68491e+06	7.04414e+06	3.95402e+06	3.05167e+06	3.13197e+06	7.28319e+06
312.266	4.22058	C19H36O3	5	FA oxo(19:0)	7	0	Lipidmaps	-1.97691	8.08511		cor-0'cor-5'cor-10'cor-20'cor-40'QC	FA oxo(19:0)	0	bp				0.18	0.51	8471921	pos307	0		H	pos	31	5401699	4954610	7547903	5667760	8471921	1.72327e+06	2.72379e+06	4666874	4294281	1.42158e+06	5.20733e+06	5.27914e+06	8446377	5.51515e+06	6.07911e+06	1.02215e+06	5410553	6.00793e+06	6.20177e+06	5.24609e+06	4.13542e+06	729033	5010342
115.944	7.11094										cor-10'cor-20'cor-40'QC		0	bp				0.21	0.21	8461703	neg163	0			negnegneg	31	4.22176e+06	5.59659e+06	5.66034e+06	4800517	4.26504e+06	5172441	5624335	4986683	4701954	5844352	5334737	4.91234e+06	5104913	5.31559e+06	5370543	5908558	5.75101e+06	5.07783e+06	5.3319e+06	5375155	5.206e+06	5.02814e+06	5739896
523.291	4.38355	C24H46NO9P	1	[PS(18:1)] 1-(9Z-octadecenoyl)-sn-glycero-3-phosphoserine	7	0	Lipidmaps	0.415612	8.74986		cor-0'cor-5'cor-10'cor-20'cor-40'QC	[PS(18:1)] 1-(9Z-octadecenoyl)-sn-glycero-3-phosphoserine	0	bp		-0.8	xC13	0.45	0.8	8447374	neg166	0		H	neg	31	1.71542e+06	2.1064e+06	2070409	1.95535e+06	2.21928e+06	7.19071e+06	3.78113e+06	2.02616e+06	1.55253e+06	8447374	1673900	3151561	3.01534e+06	1.62853e+06	4.09361e+06	4.1011e+06	2.4125e+06	2.48015e+06	3.20358e+06	2694180	2.97824e+06	3.23811e+06	2.6651e+06
135.055	16.2019		0		4			0.63218	#N/A		cor-0'cor-5'cor-10'cor-20'cor-40'QC	Adenine	0	bp		-0.1	xC13	0.1	0.34	8442592	neg168	0		H	neg	31	5.75419e+06	5802911	5025476	5.8942e+06	5.89256e+06	8442592	8.15505e+06	5.49656e+06	3.71589e+06	8.27704e+06	5002818	6.01427e+06	4.68414e+06	4.02053e+06	7.96543e+06	6835496	4.56749e+06	6131230	4.24925e+06	4043549	5575141	7272033	5190147
161.069	9.29799	C6H11NO4	11	O-Acetyl-L-homoserine	7	Yeastcyc	KEGG_Metacyc	0.0415808	-19.2914		cor-0'cor-5'cor-10'cor-20'cor-40'QC	O-Acetyl-L-homoserine	0	bp				0.16	0.21	8408229	pos308	0		H	posneg	31	5.0948e+06	6.91009e+06	6.94537e+06	5.35076e+06	8081819	6725253	6259239	6.17801e+06	4704480	7667234	4.91041e+06	6644135	6844970	4613673	6.93006e+06	6.29054e+06	5.38902e+06	7272280	6303767	4682759	5.46805e+06	8123122	6.94851e+06
264.078	12.994	C9H16N2O5S	5	N-Acetylcystathionine	7	0	HMDB	0.018317	2.8199	-2.48094	cor-0'cor-5'cor-10'cor-20'cor-40'QC	N-Acetylcystathionine	0	bp		-2.4	xC13	0.11	0.27	8345842	neg170	0		H	negneg	31	4.19185e+06	5.37867e+06	8345842	4231560	5720441	6217532	4.31476e+06	4797247	3375028	5713052	4.76949e+06	4.13322e+06	5075016	4428072	5088637	5266479	5.11442e+06	4.1874e+06	5790186	4798645	4858820	6.11263e+06	4.53139e+06
207.111	5.03084		0		3			-0.0184912	#N/A		cor-0'cor-5'cor-10'cor-20'cor-40'QC	N-Ethylglycocyamine	0	bp			x-NH3	0.51	0.51	8331424	pos310	0		H	pos	31	6.36321e+06	5639644	5177294	4.43021e+06	5.41894e+06	8331424	8.21944e+06	4.7901e+06	3.02629e+06	7.31935e+06	5383816	5575018	4.91384e+06	4.12469e+06	5.21773e+06	6.3638e+06	5.06827e+06	4627850	5173429	4020976	3.24172e+06	8172761	6.77277e+06
452.336	0.377235										QC		0	bp		C24	xC13	0.05	0.16	8266569	neg171	0			neg	31	6544645	5401680	5388320	7.17778e+06	7.33397e+06	5907813	5239230	6.52757e+06	7.5891e+06	7307004	6.12411e+06	7019587	6.36608e+06	6848817	6.79581e+06	6.09946e+06	6870217	5.66149e+06	7.36435e+06	8.19034e+06	8.26657e+06	6.21599e+06	5738213
399.283	4.7779										QC		0	bp				0.04	1.65	8247940	pos311	0			pos	16	0	2.53911e+06	640016	0	8.24794e+06	295742	0	477090	1.41726e+06	390629	0	169866	700653	0	329028	1.04519e+06	0	0	534487	0	0	0	0
177.866	28.4364										cor-0'cor-5'cor-10'cor-20'cor-40'QC		0	bp				0.11	0.45	8235665	pos312	0			pospos	31	4293595	4.95098e+06	4.31092e+06	3155228	3481232	6390370	4949913	4536765	2.1505e+06	7380303	3.63529e+06	4672968	5.95558e+06	2.73483e+06	4895342	6713434	4.3726e+06	5169834	3.68761e+06	3.24532e+06	3.58758e+06	8235665	4463737
183.064	10.5402		0		4.5			-0.0900712	#N/A		cor-0'cor-5'cor-10'QC	4-Amino-2-hydroxylamino-6-nitrotoluene	0	bp				0.09	0.9	8203556	pos313	0		H	posneg	31	3.8246e+06	4629409	8.20356e+06	741451	4.35169e+06	812605	1.58062e+06	3765086	1.23302e+06	692659	3.63323e+06	1.8555e+06	2.60946e+06	5.12043e+06	5274860	1363990	3.0587e+06	5.57039e+06	605436	4.97484e+06	1.57495e+06	550430	3299994
121.064	21.5652				0.2						cor-0'cor-5'cor-10'cor-20'cor-40'QC		0	bp				0.15	0.54	8200747	pos314	0			pos	31	5.27386e+06	8200747	5.59415e+06	3.6961e+06	3.76194e+06	6994934	6.82338e+06	5916023	3926648	7.55135e+06	4.13133e+06	2.84842e+06	2.12937e+06	1.78555e+06	4704480	7337725	6459136	7744358	4902906	3075148	3.67403e+06	6918432	5.21757e+06
247.106	13.9426	C10H17NO6	2	Linamarin	7	0	KEGG_Metacyc_HMDB	0.377009	36.083		cor-0'cor-5'cor-10'cor-20'cor-40'QC	Linamarin	0	bp				0.16	0.35	8189630	pos316	0		H	pos	31	4857295	6384154	7186215	4737287	4921629	5442278	4738989	4.04133e+06	4.4978e+06	6.30249e+06	4.11572e+06	5373024	8189630	3.33484e+06	5.52845e+06	3752727	3.99699e+06	5064989	7068917	2.55384e+06	4343971	4938890	3428695
117.079	11.4618		0		0.2			0.35827	#N/A		cor-5'cor-40'QC	Betaine	0	bp				0.1	0.23	8172715	pos317	0		H	pos	31	4.95228e+06	4.79932e+06	6281768	5684721	8172715	5471114	5310310	6.22141e+06	8.14984e+06	5.02601e+06	4088660	5.24483e+06	5069970	4262009	4686630	5.67966e+06	4.46541e+06	5.15423e+06	6.63125e+06	4.69318e+06	5.36586e+06	5.65098e+06	5.19735e+06
211.088	8.87002										cor-0'cor-5'cor-10'cor-40		0	bp				0.38	0.38	8130607	pos318	0			pos	31	6.64988e+06	6667908	6582862	7736517	6.14633e+06	6.71852e+06	6.92673e+06	6870713	6.9814e+06	7162019	6.66933e+06	7045704	7576608	6861972	7.16482e+06	7802716	6.30539e+06	6.25063e+06	6737310	7.34099e+06	6.08541e+06	7832612	6.15367e+06
93.9223	30.7235										cor-0'cor-5'cor-10'cor-20'cor-40'QC		0	bp				0.25	0.35	8096811	pos320	0			pos	31	5.67356e+06	5.76752e+06	4767178	3.7002e+06	3486334	6861436	6.40688e+06	6136000	3.25341e+06	7873132	4180431	5.41954e+06	3560411	2.89037e+06	4065929	7103411	5.06895e+06	5.92104e+06	3759523	3.0061e+06	3165385	7.15819e+06	5760157
234.111	7.72434										cor-0'cor-10'cor-20'QC		0	bp				0.17	1.55	8050777	pos321	0			pos	31	898776	1.12006e+06	1.18575e+06	345694	2.02496e+06	739746	182173	649741	8.05078e+06	832776	178032	854089	800747	311078	928309	936665	681341	365077	1.02744e+06	201321	651315	265232	5.13366e+06
678.505	17.5054										cor-20		0	bp				0.15	0.15	7968275	pos323	0			pos	31	5.70516e+06	5.60682e+06	5566921	7088479	6.46579e+06	6098267	5.61754e+06	5.50648e+06	5922860	6.32962e+06	6073453	5.24895e+06	5.72704e+06	6.659e+06	6.3609e+06	5509019	6.35507e+06	6.35025e+06	6099335	6328473	6495073	5693087	5496582
255.168	5.16627										cor-0'cor-5'cor-10'cor-20		0	bp		C11	x-NH3xC13	0.7	0.8	7941864	pos324	0			pos	30	1.21694e+06	1.35224e+06	4.2305e+06	3.35423e+06	3154619	655647	2.42603e+06	2.76689e+06	3226105	903357	3221669	2.43758e+06	2.55785e+06	5.98195e+06	1.94058e+06	2.75479e+06	590990	2.04324e+06	3.34462e+06	5226523	5.78261e+06	1.56331e+06	5.76933e+06
230.019	15.0625	C5H11O8P	16	D-Ribose 5-phosphate	10	Yeastcyc	KEGG_Metacyc_HMDB	-0.346846	-1.6805		cor-0'cor-5'cor-10'cor-20'cor-40'QC	D-Ribose 5-phosphate	0	bp				0.09	0.63	7931546	neg173	0		H	neg	31	1.22115e+06	1436772	2.08669e+06	3.28559e+06	2.50546e+06	3229169	1.69897e+06	1.83591e+06	1.67644e+06	4952134	1.6454e+06	3.12563e+06	4.25127e+06	2362644	4398525	4369270	2.80782e+06	3.30172e+06	3.43493e+06	4428363	3509694	5.00683e+06	3287342
123.032	6.30604		0		4.5			0.478774	#N/A		cor-0'cor-5'cor-10'cor-20'cor-40'QC	Isonicotinic acid	0	bp				0.37	0.61	7927277	pos325	0		H	pospos	31	1788557	844594	1.58796e+06	1.12229e+06	851748	1.0307e+06	1.75425e+06	1.63734e+06	817760	1194382	1866674	3.39535e+06	2567701	766561	4.38479e+06	968185	2867653	2821050	3.82105e+06	2.15946e+06	4.88936e+06	6.50196e+06	3.53371e+06
345.288	4.28525										cor-0'cor-5'cor-10'cor-20'cor-40'QC		0	bp				0.12	0.55	7866043	pos326	0			pos	31	2595535	2645877	3004966	3.95355e+06	3.66863e+06	2.81317e+06	3.71075e+06	3.87358e+06	4.45651e+06	5.20115e+06	4457997	5931921	3471689	7.29523e+06	1.95107e+06	2843375	3.46076e+06	4.73655e+06	7866043	3.0604e+06	1.47679e+06	3.20367e+06	3.43981e+06
339.754	23.5778				0.2						cor-0'cor-10'cor-40		0	bp				0.23	0.23	7822153	pos327	0			pos	31	5.89941e+06	6.28288e+06	7.30643e+06	7160488	6.61748e+06	6.51023e+06	6060855	4.33192e+06	4934142	4253259	5.68551e+06	5.36656e+06	7.82215e+06	6104670	6726228	5.79581e+06	5149210	4330686	6.58649e+06	4.81081e+06	5.8156e+06	4.47126e+06	4.84314e+06
487.679	19.3594	C40H53N11O18	1	5-Methyltetrahydropteroylpentaglutamate	QC	0	HMDB	0.597109	0		QC	5-Methyltetrahydropteroylpentaglutamate	0	bp		4.2	xC13	0.14	1.5	7750667	pos328	0		2-charge	posneg	31	772856	830065	1.04851e+06	421164	613627	7664577	3.17201e+06	2.0322e+06	542922	6831974	601192	1.23183e+06	574792	671024	2.40276e+06	6200728	780030	2078056	515659	550259	1.71145e+06	6319048	522398
115.944	7.91083				0.2						cor-5'cor-10'cor-40'QC		0	bp				0.43	0.43	7740016	neg175	0			negneg	31	2437777	3.35535e+06	2.47647e+06	2.36496e+06	3192673	2.61492e+06	3.29644e+06	3703330	3.843e+06	3.38837e+06	3.54296e+06	3.94972e+06	3.30576e+06	3.54008e+06	3.21842e+06	3.33405e+06	3.74881e+06	2.85697e+06	3.51779e+06	2.4159e+06	2.65873e+06	2.76357e+06	4.17807e+06
422.083	16.6109	C12H23O14P	5	alpha,alpha'-Trehalose 6-phosphate	8	Yeastcyc	KEGG_Metacyc_HMDB	0.72161	0		cor-0'cor-5'cor-10'cor-20'cor-40'QC	alpha,alpha'-Trehalose 6-phosphate	0	bp		0.3	x2+xO18xC13	0.06	0.72	7704643	neg177	0		H	neg	31	546165	669441	684408	2.53405e+06	698282	1.2186e+06	1.50564e+06	668630	824953	2.34262e+06	1.42478e+06	1.00249e+06	1.63711e+06	2138981	1.95318e+06	3309254	2.22044e+06	1.01568e+06	2.82945e+06	4.05683e+06	3.54285e+06	4423243	3.64903e+06
115.944	4.03319										cor-0'cor-40'QC		0	bp				0.33	0.33	7688236	neg179	0			neg	31	4527159	4.62951e+06	4.71969e+06	4469384	4.28499e+06	4.22875e+06	3.63916e+06	4741602	4.17077e+06	3.99199e+06	4.63611e+06	5077096	4.2705e+06	4293590	4289464	3.78905e+06	4500295	4766928	4.20355e+06	4656896	4.30537e+06	3767184	4830046
115.944	3.63798										cor-0		0	bp				0.45	0.45	7688236	neg180	0			neg	31	4527159	4.62951e+06	4.71969e+06	4469384	4.28499e+06	4.22875e+06	3.65015e+06	3.69755e+06	3.38857e+06	3.99199e+06	4.63611e+06	5077096	4.2705e+06	4293590	4289464	3.78905e+06	4500295	4766928	4.20355e+06	4656896	4.30537e+06	3767184	3781315
158.058	9.66512	C7H10O4	7	2-Isopropylmaleate	7	0	KEGG_Metacyc_HMDB	-0.260928	-1.51686		cor-0'cor-5'cor-10'cor-20'cor-40'QC	2-Isopropylmaleate	0	bp				0.47	0.55	7651574	neg182	0		H	neg	31	3.52201e+06	3680169	3383126	2.53315e+06	2.52822e+06	5.52012e+06	3.33066e+06	2.37984e+06	1.30017e+06	4.52394e+06	3106615	3409831	3.10322e+06	2172752	3.07987e+06	4955134	2.63543e+06	3.37799e+06	3.63483e+06	2231593	2531340	7651574	3.1637e+06
113.048	9.31327	C5H7NO2	6	(S)-1-Pyrroline-5-carboxylate	7	0	KEGG_Metacyc_HMDB	0.216951	-31.0928		cor-0'cor-5'cor-10'cor-20'cor-40'QC	(S)-1-Pyrroline-5-carboxylate	0	bp		-0.5	xC13	0.42	0.62	7622508	pos330	0		H	pospos	31	4.13268e+06	4891776	7622508	1.60587e+06	4.1252e+06	1.87658e+06	1306251	4275471	1976823	1398835	4451607	2.3333e+06	2.08994e+06	4681609	5290645	1.80861e+06	2.81862e+06	4319195	1.60794e+06	3.56178e+06	1.56843e+06	1.51179e+06	2.11022e+06
133.02	8.13209		0		3			-0.12439	#N/A		cor-0'cor-5'cor-10'cor-20'cor-40'QC	L-thiazolidine-4-carboxylate	0	bp		1.1	xC13	0.51	0.51	7582774	pos331	0		H	pos	31	3.0274e+06	3.28733e+06	1437968	4658532	4901715	5.87585e+06	4199633	4180085	1.33228e+06	5.23669e+06	2.27306e+06	2731138	3533520	2.85307e+06	5.4484e+06	4.79587e+06	2.32478e+06	2200778	4.4879e+06	2.81511e+06	5.04288e+06	5288547	4219559
313.181	4.38488	C20H25O3	1	4-Oxo-13-cis-retinoate	7	0	HMDB	0.551074	-17.3632		cor-40'QC	4-Oxo-13-cis-retinoate	0	bp				0.12	2.45	7561695	pos332	0		H	pos	21	0	0	0	5468102	0	0	4.88612e+06	0	1.62483e+06	0	3392479	7561695	7.53885e+06	1380127	0	0	0	5.85903e+06	3836185	979697	2939242	393738	1.41512e+06
206.079	5.91631		0		0.4			-0.0571472	#N/A		cor-0'cor-5'cor-10'cor-20'cor-40	Diethyl tartrate	0	bp				1.73	1.73	7500617	neg184	0		H	negneg	31	225101	245588	287233	274343	336950	295572	230310	125285	117565	206450	192897	266390	318877	219372	241877	219374	246550	309167	298461	227139	287109	342432	308987
953.694	7.62073		0		0.4			0.371675	#N/A		cor-5	Inositol-P-ceramide	0	bp		2.8	xC13	0.96	0.96	7451642	neg185	0		H	neg	31	6154749	4376391	3.08478e+06	4.2187e+06	3.15439e+06	40172.2	2380437	4.78096e+06	2.51993e+06	333916	3.4251e+06	5.87694e+06	3.80997e+06	1839389	5366628	147599	2895387	7.45164e+06	7375416	2.37381e+06	3.19396e+06	84095.7	3842753
219.111	6.51991		0		0.4			-0.0537296	#N/A		cor-0'cor-5'cor-10'cor-20'cor-40	Pantothenate	0	bp			x-FA	1.21	1.21	7450225	neg186	0		H	negposneg	31	662503	577569	601082	694760	479977	1.04076e+06	717148	689621	474844	1.04769e+06	791660	730809	627321	755642	773676	1.00005e+06	668996	604214	643216	803538	564559	1000907	587930
270.062	12.2243	C12H9F3N2O2	2	A771726	7	0	HMDB	1.2742	46.9132		cor-0'cor-5'cor-10'cor-20'cor-40'QC	A771726	0	bp		-4.6	xCl37xC13	0.43	0.43	7449937	neg187	0		H	neg	31	4766696	5.05363e+06	5.15396e+06	3.6783e+06	4.58044e+06	6.1334e+06	5.41429e+06	3.33647e+06	2590924	6388524	3.37412e+06	5.06996e+06	5663309	2.52265e+06	6064313	4.9835e+06	2.86981e+06	5255082	3.93505e+06	3.06332e+06	4587879	7449937	3.23001e+06
137.048	11.6776	C7H7NO2	16	N-Methylnicotinate	7	0	KEGG_Metacyc_HMDB	-0.0500658	17.9779		cor-0'cor-5'cor-10'cor-40'QC	N-Methylnicotinate	0	bp		0.7	xC13	0.15	1.06	7446587	pos333	0		H	pos	31	3039205	2283761	6006574	2.41712e+06	5.55718e+06	2.16619e+06	1.13663e+06	4.4842e+06	6248686	2757338	594202	4.22278e+06	3.88109e+06	521191	2.84299e+06	5.67977e+06	1029606	4.19443e+06	7.44659e+06	700927	1.01358e+06	1.05474e+06	1.44605e+06
319.067	14.361	C8H18NO10P	1	N-Gluconyl ethanolamine phosphate	7	0	HMDB	-0.54368	-12.3638		cor-0'cor-5'cor-10'cor-20'cor-40'QC	N-Gluconyl ethanolamine phosphate	0	bp			x-H2O	0.15	0.38	7441830	neg188	0		H	neg	31	1.74818e+06	2.31618e+06	2205754	3254746	1.75528e+06	2.75079e+06	2.07396e+06	2192573	1.76954e+06	3.28206e+06	1.53467e+06	2.16295e+06	2.33199e+06	2.75955e+06	2.80533e+06	4.11541e+06	3.325e+06	2826777	2.37979e+06	4.42606e+06	2.8159e+06	4416931	4160721
352.202	4.38054										cor-0'cor-5		0	bp					0.96	7417232	pos335	0			pos	24	935110	4.02073e+06	3.23011e+06	3.44145e+06	1.82376e+06	1.3828e+06	2122477	2.07996e+06	2.79096e+06	3966983	0	5.97695e+06	1.26526e+06	1.39669e+06	1.77363e+06	4.59127e+06	1.55597e+06	2782508	3.30497e+06	0	0	5.43206e+06	1.20164e+06
164.106	7.91385	C8H12N4	1	1-Pyrimidinylpiperazine	7	0	HMDB	-0.137362	-1.12958		cor-0'cor-5'cor-10'cor-20'cor-40'QC	1-Pyrimidinylpiperazine	0	bp		-0.6	xC13	0.08	0.57	7381661	pos337	0		H	pos	31	2736989	4.15958e+06	6.71229e+06	2.17006e+06	3.47549e+06	2251904	2.129e+06	2.46997e+06	1.59332e+06	2.3956e+06	3.42676e+06	2302150	3.62387e+06	5345652	3.76302e+06	2.21318e+06	2885921	3313857	2.35921e+06	4.30123e+06	2940250	2.19179e+06	3.0801e+06
423.157	18.3615							-3.44962			cor-5'QC		0	bp			xNa+x2-mer	0.1	1.14	7354922	pos339	0			pos	31	1.47081e+06	1.258e+06	1.0751e+06	1074506	1.08493e+06	7.35492e+06	3.1434e+06	2.00095e+06	923528	6.7637e+06	766672	2.20216e+06	1.28752e+06	881017	2.82743e+06	6624390	1.13584e+06	2.20116e+06	1.20724e+06	844074	2.83192e+06	6.35109e+06	996201
288.23	4.1593		0		0.1			0.282031	#N/A		cor-0'cor-5'cor-10'cor-20'cor-40'QC	FA hydroxy(16:0)	0	bp	xFA	-0.1	xC13	0.07	0.29	7329471	neg190	0		H	negpos	31	4.91259e+06	5777089	7329471	4.22578e+06	4.79368e+06	6.33615e+06	5.81065e+06	4700794	4.34482e+06	7018781	3.5887e+06	4.05017e+06	6.49996e+06	3.62547e+06	5685483	3.34771e+06	4.52018e+06	5.36176e+06	4971838	4.34359e+06	4.06434e+06	2.93282e+06	5.67254e+06
232.142	5.39649		0		0.4			-0.0944173	#N/A		cor-0'cor-5'cor-10'cor-20'cor-40	Ile-Thr	0	bp		1.1	xC13	0.81	0.81	7256757	neg191	0		H	negpos	31	1.5338e+06	1.97992e+06	2.02251e+06	1.37443e+06	1.82637e+06	1.30429e+06	1.78755e+06	1.68887e+06	1.38459e+06	1.49104e+06	1.47936e+06	1.21251e+06	1.66213e+06	1582298	2.03167e+06	1.06728e+06	1.859e+06	1.54158e+06	1.586e+06	1.64012e+06	1.24734e+06	1.18721e+06	1.59463e+06
809.126	11.9044	C23H38N7O17P3S	1	Acetyl-CoA	7	0	KEGG_Metacyc_Lipidmaps_HMDB	0.829231	0		cor-0'cor-5'cor-10'cor-20'cor-40'QC	Acetyl-CoA	0	bp		2.6	xC13x2+	0.07	0.37	7237731	pos341	0		H	posneg	31	1.46292e+06	1.66983e+06	1255169	3.05359e+06	1.51576e+06	1.52766e+06	2.4076e+06	1.3268e+06	1.08575e+06	1.71721e+06	1.78834e+06	1.8201e+06	1.7948e+06	1.62789e+06	2.5855e+06	2.4125e+06	3074936	2.15991e+06	1.96015e+06	2.94826e+06	2.65592e+06	2.23272e+06	6399230
474.29	3.83363		0		3			-2.7345	#N/A		cor-0'cor-5'cor-20'cor-40'QC	Ala-Lys-Thr-Arg	0	bp		8.8	xC13	0.1	0.91	7218583	neg192	0		H	neg	31	5.33635e+06	7218583	1.38038e+06	2.33805e+06	4.38975e+06	863224	3.06834e+06	4660188	2.76259e+06	748053	1.1551e+06	1.92367e+06	2.87607e+06	1.64355e+06	6.23962e+06	124886	1.60702e+06	3098200	1.28591e+06	1.14155e+06	918128	150105	1.66971e+06
199.913	29.143										cor-0'cor-5'cor-10'cor-20'cor-40'QC		0	bp			x-CO2x-CO2	0.21	0.4	7140399	neg193	0			negneg	31	4.38905e+06	5.00169e+06	4581149	2.74405e+06	3.29773e+06	6142327	4787795	4.13091e+06	2.30246e+06	5899474	3.35674e+06	4633257	3.96719e+06	2.48669e+06	3941131	6.09823e+06	4166311	5.30766e+06	3126100	2.7696e+06	3021216	7.1404e+06	4577079
307.084	15.4356		0		0.2			0.225638	#N/A	-1.89104	cor-0'cor-5'cor-10'cor-20'cor-40'QC	Glutathione	0	bp				0.06	0.25	7092888	pos342	0		H	posneg	31	4.6755e+06	5.0546e+06	3.8043e+06	5.94002e+06	4.80372e+06	6.14725e+06	4793053	4.58992e+06	3.77415e+06	6.59107e+06	4262068	4836208	5772743	3.86896e+06	6.2208e+06	5.46206e+06	4.47903e+06	3.93413e+06	6414364	4.2468e+06	6.21348e+06	7.09289e+06	5917100
188.152	21.7252	C9H20N2O2	2	7,8-Diaminononanoate	8	Yeastcyc	KEGG_Metacyc	-0.050454	37.2011		cor-0'cor-5'cor-10'cor-20'cor-40'QC	7,8-Diaminononanoate	0	bp		-1.5	xC13	0.14	0.34	6974574	pos346	0		H	pos	31	3.31259e+06	4713108	4.08852e+06	3.70429e+06	4.08232e+06	5591028	4.37414e+06	3429474	2.22565e+06	5.26769e+06	3.03203e+06	3.76194e+06	4.14175e+06	3063195	4672430	5.06382e+06	4306217	3.70258e+06	3.51006e+06	2.73659e+06	3.87444e+06	4.66676e+06	3.8589e+06
174.016	17.1369	C6H6O6	3	cis-Aconitate	8	Yeastcyc	KEGG_Metacyc_HMDB	-0.22058	22.3235		cor-0'cor-5'cor-10'cor-20'cor-40'QC	cis-Aconitate	0	bp		0.1	x-CO2xC13	0.09	0.48	6974065	neg197	0		H	neg	31	2.23399e+06	1.65451e+06	2.02509e+06	3.50191e+06	4.07939e+06	3.49194e+06	3.11661e+06	2970900	1.61495e+06	2.37381e+06	1.71247e+06	4093641	5.76818e+06	1.44705e+06	4.74342e+06	5162739	2.37913e+06	3580458	3.49286e+06	2.98912e+06	3.46053e+06	2581998	4.03367e+06
688.487	4.65318				0.4						cor-0'cor-5		0	bp				1.15	1.15	6966198	neg198	0			neg	28	1.12862e+06	1.44323e+06	1.38175e+06	1249827	1.22311e+06	179626	1.15321e+06	1.22551e+06	1.448e+06	74042.8	1.04297e+06	1197416	1.17946e+06	1.29254e+06	1.51936e+06	0	877532	984329	1.44879e+06	668375	964247	0	1.06094e+06
199.913	29.7292				0.2						cor-0'cor-5'cor-10'cor-20'cor-40'QC		0	bp				0.25	0.41	6885209	neg199	0			negneg	31	3.37282e+06	4.39599e+06	2.8441e+06	2.36207e+06	2315354	5.12252e+06	4.56463e+06	3.65454e+06	1971809	5923470	3139244	3600553	3.67586e+06	2.15722e+06	3.17959e+06	5.25791e+06	3.58139e+06	4.12137e+06	2894151	1.96708e+06	2702173	4762537	4.45271e+06
365.072	15.5207										cor-0'cor-5'cor-10'cor-20'cor-40'QC		0	bp				0.09	0.64	6766004	pos349	0			pos	31	1.89466e+06	1.83303e+06	3.3451e+06	2.78641e+06	2.60777e+06	3.12335e+06	672117	3.16384e+06	2.92196e+06	3.10583e+06	940843	4.6885e+06	6.16676e+06	724875	3.55843e+06	5616290	2.43499e+06	5887382	3.72242e+06	1.60071e+06	2.36829e+06	4.40504e+06	1.93307e+06
155.923	28.5474				0.2						cor-0'cor-5'cor-10'cor-20'cor-40'QC		0	bp				0.2	0.38	6702333	neg203	0			negneg	31	3.14127e+06	3.77564e+06	3.77363e+06	2607652	3425642	4934872	3.935e+06	3.67204e+06	2027552	5519362	3.07614e+06	3.66455e+06	3226191	2.60231e+06	3.74782e+06	5573974	3224955	3.77728e+06	2.74292e+06	2536795	2.93264e+06	5805048	3.78873e+06
419.194	4.58164		0		3			-1.96873	#N/A		cor-0'cor-5'cor-10'cor-20'cor-40'QC	Ala-Ala-Cys-Arg	0	bp			x-NH3	0.4	0.77	6701204	pos350	0		H	pos	31	2.25904e+06	2.26434e+06	5.97804e+06	3503730	2.3123e+06	1.06402e+06	2.29803e+06	3.37336e+06	6701204	732606	2.59886e+06	3.75158e+06	3583979	2.30362e+06	2.38311e+06	402676	3.00286e+06	2.50866e+06	2.98777e+06	3.75871e+06	2.75608e+06	779024	2.81403e+06
679.508	10.827				0.1						cor-5'cor-10'cor-20'cor-40'QC		0	bp	xC13			0.11	0.19	6673722	pos351	0			pos	31	5.25466e+06	3.06504e+06	4905330	5.14076e+06	5.07646e+06	5530674	6673722	4.48e+06	5.17704e+06	4675247	5443253	5078922	6.20576e+06	6136453	6.47682e+06	4954887	5.14776e+06	4619050	6.4541e+06	5115932	4501736	4.32335e+06	5006088
244.179	4.92334	C12H24N2O3	7	N-(6-Aminohexanoyl)-6-aminohexanoate	7	0	KEGG_Metacyc_Lipidmaps	-0.30157	-47.7692		cor-0'cor-5'cor-10'cor-20'cor-40'QC	N-(6-Aminohexanoyl)-6-aminohexanoate	0	bp		-0.6	xK+xC13	0.25	0.28	6632472	pos352	0		H	posneg	31	4219549	4849166	5265404	4754163	4.28903e+06	6632472	5714570	5243363	2.86954e+06	5762921	4327751	3840856	4348292	4.16396e+06	5.69983e+06	4735101	4239387	4.62415e+06	4385194	3.69682e+06	2.92211e+06	4961715	4.14896e+06
234.085	12.1829	C8H14N2O6	5	L-beta-aspartyl-L-threonine	7	0	HMDB	0.0258836	-49.3427		cor-0'cor-5'cor-10'cor-20'cor-40'QC	L-beta-aspartyl-L-threonine	0	bp		0.4	xNa+xC13xC13xO18	0.21	0.27	6616531	neg206	0		H	neg	31	6.3032e+06	5886350	5.54107e+06	5.31214e+06	4.60833e+06	5.55371e+06	6.23823e+06	4678289	3.1743e+06	5327061	5523144	5.62649e+06	6.61653e+06	4.92353e+06	6430637	4.29951e+06	5.82988e+06	4.53581e+06	4683997	4035578	5217116	5.27761e+06	5.02893e+06
555.131	17.0579				0.1						cor-0'cor-5'cor-10'cor-20'cor-40'QC		0	bp	x2-mer	C21	xC13	0.07	0.31	6610955	pos354	0			posneg	31	4740015	6.61095e+06	5681937	3.90697e+06	5419080	2.79537e+06	4.70361e+06	5009979	3053088	3.4051e+06	4894791	5.71408e+06	3459179	5365798	6143100	2.59821e+06	5564034	6.24188e+06	2.80062e+06	5.04331e+06	4.18475e+06	2.9527e+06	4.97899e+06
233.101	19.8958	C8H15N3O5	10	Ala-Gly-Ser	7	0	Peptides	0.00837825	15.4424		cor-0'cor-5'cor-10'cor-20'cor-40'QC	Ala-Gly-Ser	0	bp		-1	xC13	0.16	0.25	6569728	pos355	0		H	pos	31	4.15684e+06	4.09616e+06	4152973	3577557	4.51762e+06	5.08009e+06	3.90626e+06	4.28156e+06	2.61199e+06	4519503	2.66804e+06	2.68811e+06	4566926	3.16991e+06	4672994	3.93083e+06	3.55944e+06	4.41727e+06	3.89599e+06	3.67098e+06	3.51355e+06	4.00725e+06	3.49693e+06
338.09	15.8552										cor-10'QC		0	bp			x-NH3	0.07	1.15	6524001	pos357	0			posneg	31	1.36498e+06	2499520	6.524e+06	553043	1.61384e+06	117465	264053	1.52935e+06	2240680	197439	1.59627e+06	2.1791e+06	2.10383e+06	1.93537e+06	2.34156e+06	318197	1.45532e+06	3.70438e+06	413648	1.53581e+06	428090	441276	1.25743e+06
121.909	5.63709										cor-0'cor-5'cor-10'cor-20'cor-40'QC		0	bp				0.22	0.43	6522492	neg208	0			neg	31	5.59709e+06	5942853	5.9373e+06	6.52249e+06	5972393	2.34654e+06	4.14173e+06	5762703	5.24556e+06	2.08592e+06	4.71502e+06	6182740	6131887	4276976	5.85654e+06	887846	5.16716e+06	4.81511e+06	6.30893e+06	5.66364e+06	4859532	1.03062e+06	5.75851e+06
364.098	18.1195										cor-0'cor-5'cor-10'cor-20'cor-40'QC		0	bp		C13	xC13	0.09	0.27	6501971	pos358	0			pos	31	4685598	5541087	5.7232e+06	5.14982e+06	5.67018e+06	3.45711e+06	3.92006e+06	4.19101e+06	4481563	2.6288e+06	4.07613e+06	5.25648e+06	6.14623e+06	5645745	4.22003e+06	2.75701e+06	5177262	4175084	6.50197e+06	4986226	5317399	2.6872e+06	5550966
101.048	11.2552		0		0.2			-0.22482	#N/A		cor-0'cor-5'cor-10'cor-20'cor-40'QC	2-Aminobutan-4-olide	0	bp			x3-mer	0.14	0.48	6419355	pos359	0		H	pos	31	4.71382e+06	4.79471e+06	2.61086e+06	5.43254e+06	3.24685e+06	2.85472e+06	6.41094e+06	4.4992e+06	4414286	5680127	1.77241e+06	2.61166e+06	4674734	1.94451e+06	3.30738e+06	5904384	4.93072e+06	4659661	4.46412e+06	3573705	5061422	6.41935e+06	3.67999e+06
287.196	13.271		0		0.2			0.0768861	#N/A		cor-0'cor-5'cor-10'cor-20'cor-40'QC	Ile-Arg	0	bp				0.18	0.29	6381911	pos361	0		H	pos	31	3764855	4844283	4316445	5251497	3.67957e+06	4.40462e+06	6381911	3.92259e+06	3.86195e+06	3.63037e+06	3.63743e+06	4049683	4.5504e+06	2.67038e+06	3.13214e+06	3.62426e+06	4568013	3.7307e+06	4884299	3.61978e+06	3.6709e+06	4.1537e+06	5377191
344.027	14.4354				0.1						cor-0'cor-5'cor-10'cor-20'cor-40'QC		0	bp	x2-mer			0.2	0.48	6366460	neg210	0			neg	31	1.20181e+06	943106	1.52463e+06	3.20523e+06	1463818	1.61937e+06	1897187	1.41091e+06	1297007	1.73966e+06	2.26911e+06	1.27521e+06	1.79509e+06	4.29425e+06	2.70335e+06	2.14859e+06	2.08794e+06	1.697e+06	1.98652e+06	4695816	1.93153e+06	2.47057e+06	4432495
173.08	14.0768	C6H11N3O3	1	5-Guanidino-2-oxopentanoate	7	0	KEGG_Metacyc_HMDB	0.755602	25.0962		cor-0'cor-5'cor-10'cor-20'cor-40'QC	5-Guanidino-2-oxopentanoate	4.86e-05	bp				0.14	0.29	6346546	pos362	0		H	pos	31	5135629	4.31744e+06	4530091	4.03188e+06	5588329	2.63726e+06	3.86167e+06	3734199	2177948	2.76979e+06	3.87369e+06	3.49702e+06	3.36674e+06	4.71169e+06	4.56458e+06	2.60102e+06	3.92346e+06	4393681	3.89269e+06	3.29038e+06	4672916	2.136e+06	6346546
255.705	5.14756	C21H36N7O16P3S	1	CoA	8	Yeastcyc	KEGG_Metacyc_HMDB	0.628071	0		cor-0'cor-5'cor-10'cor-20'cor-40	CoA	0	bp		0.4	xC13	0.69	0.69	6343827	neg211	0		3-charge	neg	30	3564455	4.06581e+06	5061583	5332586	4.07611e+06	2516885	3.35085e+06	3.83811e+06	2.86157e+06	2.11624e+06	3.2253e+06	4.66425e+06	5231019	3.59746e+06	5786679	844486	3.0651e+06	4.53351e+06	4.41376e+06	3.50023e+06	3.71875e+06	838158	3.96884e+06
138.043	10.3592	C6H6N2O2	5	Urocanate	9	0	KEGG_Metacyc_HMDB	-0.187811	0.868995		cor-0'cor-10'QC	Urocanate	0	bp				0.08	1.16	6337891	pos363	0		H	posneg	31	897209	1.48641e+06	5.07503e+06	1.15733e+06	3.67589e+06	932113	375234	1.99469e+06	4491803	926242	502854	4.85459e+06	3.62726e+06	1.65252e+06	727509	2.1629e+06	875320	2.16159e+06	6337891	825441	620533	1.23982e+06	1.20339e+06
534.302	5.00443		0		3			-0.986086	#N/A		cor-10	Arg-Phe-Gly-Arg	0	bp				0.67	1.68	6311568	pos364	0		H	pos	24	1.88608e+06	4.00534e+06	6.31157e+06	378945	1.73638e+06	0	820334	2.09361e+06	1.22365e+06	0	2223877	2.9118e+06	2205430	4.32263e+06	3.96799e+06	347700	1.91492e+06	5854228	0	1.85443e+06	862887	0	1.05632e+06
128.058	14.674	C5H8N2O2	5	5,6-Dihydrothymine	7	0	KEGG_Metacyc_HMDB	-0.802285	37.8907		cor-0'cor-5'cor-10'cor-20'cor-40'QC	5,6-Dihydrothymine	0	bp				0.05	0.78	6257291	pos365	0		H	pos	31	2845817	4.03459e+06	6257291	1.29044e+06	3.29448e+06	1.28928e+06	1.08685e+06	2.63749e+06	2.44772e+06	1.02204e+06	2.91919e+06	2.79642e+06	2.53863e+06	3.29299e+06	3.66863e+06	783592	2.60481e+06	4332577	915465	2294619	1.387e+06	1.38033e+06	1.71926e+06
181.041	11.4708	C5H11NO4S	2	DL-Methionine sulfone	QC	0	Metacyc	0.512119	-16.9375		QC	DL-Methionine sulfone	0	bp				0.09	1.23	6237586	pos366	0		H	posneg	21	1.2654e+06	2239890	6.23759e+06	0	1.99537e+06	0	0	1.37273e+06	1.26791e+06	0	1875594	1.61885e+06	1.38264e+06	1.30359e+06	2.42958e+06	0	1.27433e+06	2484084	0	1.16169e+06	0	0	1.40119e+06
177.866	30.0607										cor-0'cor-5'cor-10'cor-20'cor-40'QC		0	bp				0.26	0.37	6165605	pos367	0			pos	31	3.19237e+06	3.28196e+06	2.92091e+06	2.18705e+06	2.73159e+06	4.47869e+06	3.82732e+06	3937055	2.13145e+06	5.35481e+06	3.02795e+06	3.51476e+06	2.65578e+06	2.24696e+06	2.8699e+06	4871235	3.46952e+06	4742855	2.59299e+06	2.30261e+06	2.48736e+06	5.38338e+06	4.08161e+06
147.09	13.3531		0		0.2			-0.0549722	#N/A		cor-0'cor-5'cor-10'cor-20'cor-40'QC	Fagomine	0	bp				0.15	0.6	6159782	pos368	0		H	pos	31	780065	1.17919e+06	1.1208e+06	943036	2.56644e+06	834904	2.54231e+06	2.66973e+06	2.15907e+06	3.53606e+06	2317931	2.32147e+06	3.43245e+06	1.90725e+06	2880449	4.3936e+06	674292	808678	998856	596109	2.35141e+06	1.04639e+06	2.97882e+06
376.313	4.62511				0.1						cor-0'cor-5'QC		0	bp	x-H2O	C31	xC13	0.56	0.81	6110729	pos369	0			pos	28	1.74204e+06	1.65614e+06	1.94909e+06	1.60426e+06	1669705	405627	1.33939e+06	1.61368e+06	1.33797e+06	32234.7	2169953	2661090	2.15401e+06	4.0047e+06	1.25218e+06	0	1.66351e+06	2.01943e+06	1.73556e+06	2.67911e+06	1.04693e+06	0	1.51535e+06
352.077	14.5172		0		#N/A			0.479364	#N/A		cor-0'QC	7-Hydroxymethyl-12-methylbenz[a]anthracene sulfate	-2.8e-06	bp				0.07	1.04	6108631	neg215	0		H	neg	31	701351	609493	554977	680385	441781	2.10631e+06	1.1496e+06	755097	315769	3.76446e+06	661203	535110	638057	912830	1.22535e+06	3.32781e+06	779337	753736	687922	1.82457e+06	1.07923e+06	3.85762e+06	959826
244.07	11.8275	C9H12N2O6	3	Pseudouridine	7	0	KEGG_Metacyc_HMDB	-0.11193	-1.10785		cor-0'cor-5'cor-10'cor-20'cor-40'QC	Pseudouridine	0	bp		-0.3	xC13	0.1	0.2	5996053	neg218	0		H	neg	31	3.99669e+06	5118192	4978747	4.04498e+06	5433072	5353298	4.67113e+06	3853673	3.21847e+06	5171145	3.77797e+06	4.15583e+06	3.98162e+06	3948119	4.95606e+06	4513163	4.61578e+06	4691996	4077502	3.79861e+06	4.5302e+06	4993707	4755661
488.313	10.9501				0.2						cor-0'cor-5'cor-10'cor-20'cor-40'QC		0	bp		C26	xC13xCl37	0.57	0.73	5960976	neg219	0			neg	31	3.67671e+06	3.81184e+06	5.11392e+06	4.85417e+06	5752201	4.27571e+06	1.52039e+06	1.46453e+06	4630741	1.22102e+06	3987320	5268356	5.84565e+06	5.00471e+06	4.62262e+06	3.83424e+06	3.2854e+06	3.78646e+06	5.96098e+06	5.09381e+06	5133220	3.33523e+06	4.14361e+06
301.188	5.15476										cor-0'cor-5'cor-10'cor-20		0	bp				0.67	1.05	5950377	pos373	0			pos	30	1.37666e+06	1.0897e+06	3.43901e+06	2.07044e+06	1.08074e+06	1.30294e+06	1.58704e+06	1.10914e+06	2.07443e+06	1.09972e+06	546381	1.5111e+06	2.00256e+06	446605	1.50428e+06	1.10224e+06	1.28518e+06	2.38467e+06	1.3107e+06	533900	368157	1.81081e+06	690439
302.17	16.3204		0		0.2			0.219571	#N/A		cor-0'cor-5'cor-10'cor-20'cor-40'QC	Ala-Gly-Arg	0	bp				0.1	0.68	5917870	pos374	0		H	pos	31	2.1741e+06	2769324	1.90559e+06	3.21444e+06	3.16607e+06	2.38014e+06	4051671	2.23912e+06	1.43954e+06	2.01679e+06	1.73877e+06	1.96063e+06	1.8382e+06	1.64592e+06	1.75122e+06	5917870	2.2143e+06	2.17992e+06	4271424	1.56214e+06	1.87174e+06	5.88033e+06	4.35505e+06
193.095	11.3903				0.2						cor-0'cor-5'cor-10'cor-20'cor-40'QC		0	bp				0.32	0.35	5891472	pos375	0			pos	31	3.21115e+06	3092402	2.49725e+06	3306073	4.1553e+06	1.66066e+06	3204722	2430436	2.38689e+06	3.50044e+06	2.1917e+06	2.97552e+06	2688459	2.87911e+06	3.22612e+06	3.076e+06	2363120	3.25769e+06	2.06134e+06	2532797	3.36387e+06	3.83469e+06	3.62669e+06
699.302	4.10935				0.1						cor-20'QC		0	bp	xC13			0.2	1.35	5884570	neg222	0			neg	27	1.55898e+06	1.24204e+06	3.80703e+06	2.27096e+06	1.54462e+06	0	645450	1.38864e+06	5.88457e+06	0	1.88072e+06	2373168	2.2062e+06	2318568	1.51198e+06	0	3.02629e+06	2650646	1.88278e+06	2.69665e+06	2.337e+06	66841.3	1.87915e+06
189.082	4.73841		0		3			-0.110304	#N/A		cor-0'cor-5'cor-10'cor-20'cor-40'QC	Prenyl-L-cysteine	0	bp				0.26	0.55	5862259	pos376	0		H	posneg	31	2.39295e+06	2.2606e+06	1.28698e+06	2.55549e+06	2.16368e+06	5.21614e+06	3.52465e+06	2609434	1300921	5503578	1.20247e+06	2847465	3.11926e+06	1.41254e+06	2543316	4.14427e+06	2.07006e+06	1.63363e+06	3.58533e+06	1739441	1.57185e+06	4939917	2674690
147.053	13.502		0		0.2			-0.369338	#N/A		cor-0'cor-5'cor-10'cor-20'cor-40'QC	L-Glutamate	0	bp				0.38	0.41	5819699	pos377	0		H	pos	31	2418284	3.05905e+06	3086696	3.16413e+06	2.56512e+06	2.62574e+06	2.92654e+06	3.00513e+06	2.83599e+06	3914335	2585888	2.79696e+06	2.59346e+06	2.37845e+06	2.80766e+06	5.8197e+06	2.66349e+06	2.72814e+06	3.54319e+06	2.18003e+06	3.45013e+06	5.80205e+06	2.61971e+06
265.95	17.0726										cor-5'cor-40'QC		0	bp				0.21	1.29	5756247	neg223	0			neg	31	326452	326822	974183	776489	485644	2193189	379983	898404	911670	2.06692e+06	177002	1.30271e+06	1.03834e+06	259925	733452	2.76679e+06	461654	1.26286e+06	786566	400350	945547	5.75625e+06	538426
172.004	10.5474										cor-0'cor-5'cor-40'QC		0	bp				0.26	1.97	5734220	neg224	0			negneg	31	127664	197032	169438	112789	189870	125142	146066	128196	269283	103682	1.35496e+06	165239	133550	113744	114619	191159	103039	96953	230986	622896	5734220	98242.2	131454
418.308	4.18412	C26H42O4	14	Diisononyl phthalate	7	0	KEGG	-0.0080088	4.40054		cor-0'QC	Diisononyl phthalate	0	bp				0.3	1.25	5716538	pos378	0		H	pos	31	1.93417e+06	1169082	2.9043e+06	1.41644e+06	2.93664e+06	125253	308918	715357	2.49308e+06	55365.4	586155	4550050	1.01957e+06	350097	2.85398e+06	63350.6	660323	2.03183e+06	5716538	306377	1.28433e+06	79379	1.12332e+06
174.1	10.3274	C7H14N2O3	8	N-Acetylornithine	7	Yeastcyc	KEGG_Metacyc_HMDB	-0.333757	-17.7453		cor-0'cor-5'cor-10'cor-20'cor-40'QC	N-Acetylornithine	0	bp				0.09	0.27	5649676	pos380	0		H	pos	31	3.43664e+06	3902614	3474042	3938136	3.69077e+06	3.47002e+06	3.8223e+06	3.51983e+06	2328926	4649208	3.25348e+06	3.26464e+06	4216408	3.00449e+06	4.43574e+06	2.96665e+06	3.48814e+06	3.83801e+06	3587982	3.50887e+06	3.42355e+06	3.32653e+06	3.54516e+06
282.115	20.9006		0		3			-1.04989	#N/A	-2.32597	cor-0'cor-5'cor-10'cor-20'cor-40'QC	3,4-dichloro-tridecanoic acid	0	bp		0.2	x-H2OxC13xC13x-H2OxC13	0.04	0.21	5612100	neg229	0		H	neg	31	3769854	3.73686e+06	3.24558e+06	3.87035e+06	4.15264e+06	4.02829e+06	3496459	3.11557e+06	2.70107e+06	4.24954e+06	2.61162e+06	2.99091e+06	4332523	3.12229e+06	4.0022e+06	2.71771e+06	3.55696e+06	2.9269e+06	4.28915e+06	2904826	3.23422e+06	3.63667e+06	3.67708e+06
228.04	5.02603		0		0.4			0.401429	#N/A		cor-0'cor-5'cor-40	Mevalonic acid-5P	0	bp				0.95	1.03	5611148	pos381	0		H	pos	28	2.11879e+06	2437324	1.91599e+06	1198602	1.368e+06	5611148	2.32125e+06	2017954	832757	4827179	0	1984618	1.26048e+06	674822	811736	4464441	2.33509e+06	2.24359e+06	1.32694e+06	0	1.09732e+06	4896370	3.49055e+06
271.178	4.32579										cor-0'cor-5'cor-10'cor-20'cor-40'QC		0	bp			x-NH3	0.15	0.52	5597681	pos382	0			pos	31	3310067	1.64346e+06	4295351	3.0466e+06	1.32115e+06	2.27417e+06	2447165	1.93421e+06	5.33438e+06	2.34863e+06	3.2453e+06	3645820	3.94949e+06	2.51864e+06	1.71413e+06	2.1971e+06	1792001	3252633	2.28678e+06	3.0426e+06	2.08607e+06	5.59768e+06	1.9414e+06
206.09	11.6702		0		0.2			-0.0845132	#N/A		cor-0'cor-5'cor-10'cor-20'cor-40'QC	N-hydroxy DAP	0	bp		0.5	xC13	0.5	0.5	5588704	pos383	0		H	posneg	31	3.76686e+06	4265447	4.09942e+06	4611787	4.15296e+06	3.51157e+06	5588704	3671028	3.03964e+06	3.77028e+06	3.54403e+06	4455778	4.62994e+06	3.02579e+06	4.40043e+06	3.52694e+06	3.46954e+06	4.03063e+06	4.4997e+06	3.13789e+06	3.68137e+06	3.67776e+06	4541716
278.152	4.26429	C16H22O4	7	2-Ethylhexyl phthalate	7	0	KEGG_Metacyc_HMDB	0.206025	-9.53864		cor-0'cor-5'cor-10'cor-20'cor-40'QC	2-Ethylhexyl phthalate	0	bp				0.18	0.46	5443459	pos385	0		H	pos	31	3.23786e+06	1.94279e+06	2.14883e+06	2.00641e+06	2.30554e+06	2.95045e+06	2.54868e+06	3.38118e+06	2.09317e+06	1.63087e+06	2.0918e+06	3.22984e+06	2.61358e+06	2.19775e+06	1.81773e+06	962649	2982693	4.93494e+06	3308291	1462039	5.06391e+06	1.88447e+06	3335685
353.071	11.2925	C11H19N3O6S2	1	Glu-Cys-Cys	7	0	Peptides	-0.771641	-25.1273		cor-0'cor-5'cor-10'cor-20'cor-40'QC	Glu-Cys-Cys	0	bp				0.06	0.75	5433775	pos386	0		H	posneg	31	2.29409e+06	3.47374e+06	5.43377e+06	739226	2.72105e+06	532118	846798	2.41928e+06	893554	683493	3.20156e+06	1558545	1.22873e+06	2.87498e+06	3.95977e+06	938934	1.81502e+06	2.97006e+06	537547	2.29344e+06	701009	746464	1.04057e+06
686.47	3.67741										QC		0	bp		C56	xC13	0.72	0.96	5421297	neg234	0			neg	26	4118291	4.31852e+06	4.01657e+06	5.4213e+06	4.58769e+06	0	529715	2.72194e+06	2.14338e+06	0	3.32826e+06	4.11724e+06	4.097e+06	3.68563e+06	2261606	0	3.16412e+06	2.61456e+06	3.86016e+06	3.4683e+06	2.92225e+06	0	4384820
228.147	7.76854		0		0.2			0.0902647	#N/A		cor-0'cor-5'cor-10'cor-20'cor-40	L-isoleucyl-L-proline	0	bp				0.92	0.92	5247407	neg237	0		H	neg	31	956762	1254301	1.06224e+06	1.01353e+06	981291	1.03238e+06	771279	1.16515e+06	1.28869e+06	815825	913853	1.00993e+06	1.26735e+06	1.48213e+06	1.02305e+06	892998	1.09335e+06	1.18018e+06	918070	738949	747722	900942	1.34692e+06
204.061	13.6582				0.1						cor-0'cor-5'cor-10'cor-20'cor-40'QC		0	bp	xNa+			0.33	0.53	5129909	pos388	0			pos	31	3316909	3167552	2.72777e+06	4234317	4243226	1.56319e+06	2.06518e+06	2793001	5129909	1650632	2.40176e+06	2.93603e+06	3634669	2.19678e+06	2707180	1.65255e+06	2.35171e+06	2.40302e+06	3.82462e+06	2.24314e+06	3365626	1.76235e+06	2.97873e+06
147.053	15.0274		0		0.2			-0.337377	#N/A		cor-0'cor-5'cor-10'cor-20'cor-40'QC	D-Glutamate	0	bp				0.27	0.3	5127943	pos389	0		H	pos	31	2.88411e+06	3.03786e+06	2.56135e+06	3.76341e+06	4.18647e+06	2.9248e+06	2183537	2.04025e+06	2.91136e+06	3.35286e+06	2.35204e+06	3.55618e+06	3.00257e+06	2.53896e+06	5127943	3.20153e+06	3.24692e+06	3.36383e+06	2393406	3.19788e+06	3004864	3.22687e+06	3.16427e+06
90.0316	9.17401	C3H6O3	9	(R)-Lactate	8	Yeastcyc	KEGG_Metacyc_Lipidmaps_HMDB	-1.4457	-20.9634		cor-0'cor-5'cor-10'cor-20'cor-40'QC	(R)-Lactate	0	bp		0.4	xC13	0.22	0.61	5127940	neg239	0		H	neg	31	1.16094e+06	1.6535e+06	2.90103e+06	1.42904e+06	5.12794e+06	2.15325e+06	1.41066e+06	1.62357e+06	2.34804e+06	2.53333e+06	1.16114e+06	2.66556e+06	2.05396e+06	2.015e+06	1.64355e+06	3818583	1.25542e+06	2150553	3.17624e+06	1.52139e+06	1261311	2.71904e+06	1.73777e+06
126.043	11.0103	C5H6N2O2	4	Imidazole-4-acetate	9	0	KEGG_Metacyc_HMDB	-0.200283	1.10434		cor-0'cor-5'cor-10'cor-20'cor-40'QC	Imidazole-4-acetate	0	bp				0.23	0.45	5085001	pos392	0		H	pos	31	1.84657e+06	2.16863e+06	3672644	1.45556e+06	2.67667e+06	1.13676e+06	1205122	1.89074e+06	968816	1.32199e+06	1.97692e+06	1.88695e+06	2.53119e+06	2.86086e+06	3239522	922585	1.89936e+06	2.40942e+06	1.50929e+06	2.84359e+06	1.82625e+06	2.02351e+06	2.15864e+06
224.994	16.8058										cor-10'QC		0	bp		C4	xC13	0.12	1.85	5069928	neg240	0			neg	31	992173	1.31444e+06	5069928	56164	1.45772e+06	24675.9	64552	987017	473990	45611.1	1.3982e+06	526604	837774	1.28033e+06	1.96286e+06	82118.7	912815	1.73181e+06	26855.9	955288	167827	22850.3	324329
145.004	9.71888										cor-20'QC		0	bp				0.06	1.6	5065836	pos395	0			pos	22	0	0	135066	293239	0	0	5.06584e+06	0	975243	0	54165.5	463196	227364	0	0	0	297404	368275	269435	57466.4	226868	265934	224445
212.141	4.45082	C12H20O3	16	FA oxo(12:1)	7	0	KEGG_Metacyc_Lipidmaps_HMDB	0.598766	-14.4362		cor-0'cor-10'cor-20'cor-40'QC	FA oxo(12:1)	0	bp		-1.8	xFAxC13	0.38	0.81	5015641	neg241	0		H	neg	31	1.81115e+06	1.61179e+06	5.01564e+06	2677210	1.67609e+06	362977	1.36434e+06	1.68776e+06	3.80639e+06	324811	1.52597e+06	2.71367e+06	3163405	1.18049e+06	1.7761e+06	237039	1.881e+06	3.22752e+06	2.87072e+06	1.44298e+06	1.52377e+06	426135	1.74826e+06
109.064	15.9119	C5H7N3	2	Brunfelsamidine	7	0	KEGG	0.0013377	-3.49801		cor-0'cor-5'cor-10'cor-20'cor-40'QC	Brunfelsamidine	0	bp				0.09	0.18	4990984	pos396	0		H	pos	31	2.87145e+06	3.65415e+06	4.30105e+06	4.06951e+06	4.0782e+06	3758580	3.32991e+06	3.26092e+06	3.69594e+06	4.3726e+06	2787150	2.97273e+06	4.35447e+06	2893197	3.66546e+06	3.31422e+06	3.10158e+06	3.94333e+06	4819012	3213552	4.32097e+06	4.37507e+06	3.33734e+06
113.084	7.01342		0		4.5			0.244536	#N/A		cor-0'cor-5'cor-10'cor-20'cor-40'QC	epsilon-Caprolactam	0	bp				0.16	0.68	4978445	pos397	0		H	pos	31	3.02762e+06	2.00974e+06	1362804	1.89585e+06	1.19601e+06	701250	4.97844e+06	2.01264e+06	2.3332e+06	1.56785e+06	1.87025e+06	2.10949e+06	2.77631e+06	1.51535e+06	3.27118e+06	858440	2.02604e+06	1.35995e+06	1211402	4570838	1.93084e+06	828419	1.84989e+06
314.225	4.23467	C21H30O2	22	Progesterone	QC	0	KEGG_Metacyc_Lipidmaps_HMDB	0.881203	-20.9691		QC	Progesterone	0	bp				0.54	1.02	4973592	pos398	0		H	pos	26	3.37538e+06	3144621	4.97359e+06	1.15958e+06	1855149	0	837490	3.22183e+06	1.28544e+06	0	2.4899e+06	2.70211e+06	2.17264e+06	1.69839e+06	3450205	0	1.72945e+06	3565528	904970	1.93757e+06	986138	0	1.0532e+06
665.125	12.8142	C21H29N7O14P2	1	NADH	7	0	KEGG_Metacyc_HMDB	0.149421	0		cor-0'cor-5'cor-10'cor-20'cor-40'QC	NADH	0	bp		1.5	xNa+xC13xK+x2+xO18	0.15	0.57	4939868	neg242	0		H	neg	31	1.5931e+06	1.80888e+06	1.23504e+06	3034788	2.05388e+06	3084396	3.45956e+06	1.6596e+06	1438301	4.69331e+06	1.37852e+06	3088326	4572892	615618	2.87635e+06	2.06849e+06	2308399	2.28606e+06	4072458	1.03152e+06	3695180	1.35229e+06	4224646
307.084	17.4766		0		0.2			0.484525	#N/A	-1.63216	cor-0'cor-5'cor-10'cor-20'cor-40'QC	Glutathione	0	bp				0.09	0.29	4899517	pos400	0		H	pos	31	3.08198e+06	3.25627e+06	1.8139e+06	3088133	3.24478e+06	4206476	3591276	2989173	2.60544e+06	4.89952e+06	3.39501e+06	3.84657e+06	3.21522e+06	2.83438e+06	3.33337e+06	3589453	3.97429e+06	3.1237e+06	3.06415e+06	2.53406e+06	3.36933e+06	3.55669e+06	3.91639e+06
155.923	30.0983				0.1						cor-0'cor-5'cor-10'cor-20'cor-40'QC		0	bp	x-CO2			0.21	0.4	4852766	neg243	0			neg	31	3081130	3.29554e+06	2.70719e+06	1.94732e+06	2.14335e+06	3.94803e+06	3380503	3.28969e+06	1.61223e+06	4.85277e+06	2368386	3153300	2.23326e+06	1.6895e+06	2602488	4067737	2.77157e+06	3.36546e+06	1.99496e+06	1.72404e+06	1.82542e+06	4.27413e+06	3488251
299.283	4.6468	C18H37NO2	8	[SP] 3-dehydrosphinganine	8	Yeastcyc	KEGG_Metacyc_Lipidmaps_HMDB	0.680851	5.23232		cor-0'cor-5'cor-10'cor-20'cor-40'QC	[SP] 3-dehydrosphinganine	0	bp		2.8	xC13	0.31	0.71	4851877	pos402	0		H	pos	31	4.21562e+06	4553569	4586644	4.71778e+06	4.10091e+06	409762	1.89607e+06	4493520	3.52251e+06	370212	2.96534e+06	4.61087e+06	4851877	3.02982e+06	3.3776e+06	140265	3.62876e+06	4195988	3603110	3.17724e+06	2.49668e+06	170258	4232285
243.183	4.76323	C13H25NO3	1	N-Undecanoylglycine	7	0	HMDB	0.147153	-5.70954		cor-0'cor-5'cor-10'cor-20'cor-40'QC	N-Undecanoylglycine	0	bp				0.43	0.59	4838383	pos403	0		H	posneg	31	3.68778e+06	2.30532e+06	3049484	1.57016e+06	4.83838e+06	2.00248e+06	1.84413e+06	1.66837e+06	4.7388e+06	1.83822e+06	821147	2.02627e+06	4.46329e+06	1.51437e+06	2.3322e+06	2.32219e+06	1.72938e+06	2.36806e+06	1.93901e+06	2.80946e+06	1.08044e+06	1.54311e+06	3.11076e+06
320.905	18.2253										QC		0	bp				0.08	1.53	4781656	pos404	0			pos	31	298078	368987	278870	208281	290053	3.0925e+06	1.17443e+06	695607	321039	3.15089e+06	262923	352231	244046	274896	799795	3.51253e+06	260542	536386	319996	384528	680871	4781656	267229
232.908	29.6229										QC		0	bp				0.1	0.23	4765079	pos405	0			pos	31	3.51346e+06	3.82132e+06	2.22911e+06	2.30945e+06	2.51577e+06	2.9623e+06	3796516	3942449	2688875	2.951e+06	3919263	4.11649e+06	3513166	3344254	3.0707e+06	4750453	4254996	4765079	3.09548e+06	3.43299e+06	3424599	4.70858e+06	2.74279e+06
307.084	17.1154		0		0.2			0.0550019	#N/A	2.17169	cor-0'cor-5'cor-10'cor-20'cor-40'QC	Stealthin C	0	bp				0.49	0.49	4764556	pos406	0		H	pos	31	2669398	3.01608e+06	2.6653e+06	3.55766e+06	4.16964e+06	3.49423e+06	3591276	2.62515e+06	2.60544e+06	3.50517e+06	3.39501e+06	3.84657e+06	2.8996e+06	2.38322e+06	3.20554e+06	3.30612e+06	3.97429e+06	1.86985e+06	3.59654e+06	2.53406e+06	4.36615e+06	3.8124e+06	3.91639e+06
337.825	28.973										cor-0'cor-5'cor-10'cor-20'cor-40'QC		0	bp			xCl37x-CO2x-CO2	0.11	0.39	4685921	neg245	0			neg	31	2.6146e+06	2910668	2.27678e+06	1.78588e+06	2.05913e+06	3.80482e+06	2561456	2215818	1.6313e+06	3.88028e+06	2.0523e+06	2.34611e+06	2.39835e+06	1.65173e+06	2227464	3.87283e+06	2354623	3.11192e+06	1.98916e+06	1.75544e+06	1.90776e+06	4371183	2.84204e+06
244.088	8.57945	C10H16N2O3S	1	Biotin	10	Yeastcyc	KEGG_Metacyc_HMDB	0.683775	0.934661		cor-0'cor-5'cor-10'cor-20'cor-40'QC	Biotin	-3.1e-06	bp		-0.4	xK+xC13	0.19	0.78	4683398	pos407	0		H	posneg	31	2.18892e+06	1.79671e+06	1.34239e+06	1.98027e+06	1.72019e+06	1.21667e+06	2.53336e+06	2.01158e+06	843555	1.57754e+06	1962150	2028417	1.89929e+06	1.38319e+06	2.42095e+06	1.21343e+06	1.6083e+06	2.11975e+06	1.19799e+06	1.3902e+06	1395841	1.23797e+06	4.6834e+06
242.188	4.19954	C14H26O3	10	[FA oxo(14:0)] 3-oxo-tetradecanoic acid	7	0	Lipidmaps_HMDB	-0.256416	-5.08512		cor-0'cor-5'cor-10'cor-40'QC	[FA oxo(14:0)] 3-oxo-tetradecanoic acid	0	bp				0.34	1.83	4661150	neg246	0		H	neg	31	310145	418797	528579	265975	323949	97821.5	404785	404551	359207	159428	163497	212873	482984	296282	377957	103837	4661150	414322	272199	312030	176165	87106.8	333582
145.11	5.61556		0		0.4			0.197564	#N/A		cor-0'cor-5'cor-10'cor-20'cor-40	3-Dehydroxycarnitine	0	bp				1.32	1.32	4622504	pos408	0		H	pos	31	679720	465455	715217	649363	1.69268e+06	1.07764e+06	501434	377603	671409	693291	379643	422893	500103	342520	479761	944321	251036	311926	369182	201916	435491	585962	1194133
228.025	17.5541				0.1						cor-0'cor-5'cor-10'cor-20'cor-40'QC		0	bp	xNa+	C9	xC13	0.22	0.48	4612069	pos409	0			pos	31	3.63941e+06	2.97527e+06	2.42886e+06	4612069	3.70636e+06	1018975	2.60421e+06	2.54287e+06	3.17392e+06	1.26224e+06	2.52907e+06	3.11324e+06	3362483	2304045	2319176	1.04646e+06	3.55168e+06	1830715	4123009	1.905e+06	2.34666e+06	940962	4515780
275.824	28.2834										cor-0'cor-5'cor-10'cor-20'cor-40'QC		0	bp				0.16	0.45	4503549	pos413	0			pos	31	1.81826e+06	2492704	2.6462e+06	1.73335e+06	1.81946e+06	3131321	2389633	1.91828e+06	1.22964e+06	3.72249e+06	1.53819e+06	2.29246e+06	2.33142e+06	1398984	2.72941e+06	3616914	1706443	2.3644e+06	1.83314e+06	1.45095e+06	1.62799e+06	3.96404e+06	2.24859e+06
344.224	5.15386				0.1						cor-5		0	bp	xC13			0.67	1.39	4492996	pos414	0			pos	25	243185	0	1.14714e+06	614838	0	0	1.30564e+06	669540	930274	130795	3.15902e+06	666818	684985	3.58911e+06	406044	1.33648e+06	0	447923	575984	3.24916e+06	4.493e+06	540386	1.5287e+06
331.068	12.1512	C10H14N5O6P	2	dAMP	9	0	KEGG_Metacyc_HMDB	-0.167993	0.422895		cor-0'cor-5'cor-10'cor-20'cor-40'QC	dAMP	0	bp				0.09	0.53	4472226	pos415	0		H	posneg	31	2228189	2.19377e+06	1.53481e+06	1.04515e+06	2.37392e+06	1.44586e+06	1.90714e+06	2.39028e+06	1.0086e+06	1.89877e+06	1.08184e+06	2900713	2.91791e+06	630405	2.01212e+06	1.3033e+06	1.87019e+06	3063701	2.2717e+06	705472	1.61203e+06	1.41538e+06	2.32309e+06
469.363	21.2888										cor-5		0	bp				0.16	0.16	4423102	pos417	0			pos	31	3.156e+06	3.4674e+06	3.79601e+06	3.53112e+06	3.35207e+06	3.09586e+06	3.46975e+06	3.41914e+06	3.29227e+06	3.504e+06	3.07597e+06	3164381	4393919	3429571	4407579	4.07068e+06	3.77182e+06	3.0575e+06	3.50581e+06	4.21261e+06	3.95579e+06	3814815	3.48957e+06
194.115	5.30194										cor-0'cor-5'cor-10'cor-20'cor-40		0	bp		C16	xC13xNH3	0.62	0.62	4416097	pos418	0			pos	31	2007661	1.40257e+06	3.54251e+06	2.57043e+06	2576110	1.41316e+06	1.96128e+06	2.65803e+06	4.4161e+06	1.40141e+06	1.52466e+06	2408897	2637265	2.13208e+06	2.53296e+06	3.04433e+06	1250173	2174886	3.65407e+06	2139314	2.4151e+06	1.71724e+06	3.53078e+06
202.107	15.407										cor-0'cor-5'cor-10'cor-20'cor-40'QC		0	bp				0.12	0.79	4414475	pos419	0			pos	31	3.28358e+06	3.088e+06	4414475	471399	3.02679e+06	464929	1158392	3054950	1.24657e+06	634425	3.47735e+06	1.0467e+06	1.20613e+06	4154979	3.54879e+06	981154	2.69181e+06	3.17709e+06	325361	3.51721e+06	1.12043e+06	235182	1.61832e+06
486.29	4.38793		0		0.2			-2.42528	#N/A	-2.79543	cor-0'cor-5'cor-10'cor-20'cor-40'QC	Ala-Leu-Gln-Arg	0	bp				0.4	0.55	4391171	neg251	0		H	neg	31	1.73051e+06	1.71823e+06	1941911	2.66048e+06	1.75701e+06	1.96627e+06	1.53458e+06	885668	1.61486e+06	942257	2.52139e+06	1.34344e+06	1339449	2.11228e+06	2.64364e+06	718786	2.17191e+06	1.57251e+06	1.49838e+06	1.90005e+06	3.6788e+06	508492	1.88907e+06
337.825	28.5771										cor-0'cor-5'cor-10'cor-20'cor-40'QC		0	bp				0.2	0.45	4371183	neg252	0			neg	31	1.52353e+06	1.90488e+06	2858264	1.58172e+06	2.05913e+06	3.19522e+06	2.50303e+06	2092888	1.1812e+06	3.7393e+06	2.12015e+06	2.23462e+06	2.05519e+06	1188928	2.31909e+06	3.16275e+06	2221867	2804717	1.98916e+06	1.63592e+06	1.90776e+06	4371183	2.21172e+06
443.166	10.8314										cor-0'cor-5'cor-10'cor-20'cor-40'QC		0	bp				0.7	0.7	4361867	neg253	0			neg	31	979860	945103	1.83588e+06	1.34876e+06	1.85933e+06	1.56294e+06	1.53112e+06	1.3624e+06	743043	1.12124e+06	1.27779e+06	1.85986e+06	1.9498e+06	1.14621e+06	1684076	1.46152e+06	1.17544e+06	1.06507e+06	1.59738e+06	956630	1.65036e+06	1.49444e+06	1.56464e+06
359.845	19.18										QC		0	bp			x2+	0.09	2.08	4361551	neg254	0			neg	31	84840.4	114468	80512.9	42733.7	56777.1	2.61301e+06	499168	227878	84661.6	2.3188e+06	68317.4	116111	65301.9	87069	258296	3080292	74276.4	195628	70566.6	116058	200034	4361551	73329
323.838	28.8177				0.2						cor-5		0	bp				0.21	0.21	4330151	pos421	0			pos	31	3.43473e+06	3178221	3.53255e+06	4127035	3610627	3.34878e+06	3727221	3406397	3883694	3.81063e+06	3.42558e+06	2.8076e+06	3.10264e+06	3.29621e+06	3.23756e+06	3.30015e+06	3.93221e+06	3.12665e+06	3.12983e+06	4.33015e+06	3001687	3.12101e+06	3.28135e+06
188.116	9.03817	C8H16N2O3	12	N6-Acetyl-L-lysine	7	0	KEGG_Metacyc_HMDB	-0.135119	-20.6466		cor-0'cor-5'cor-10'cor-20'cor-40'QC	N6-Acetyl-L-lysine	0	bp			xNa+	0.16	0.19	4329602	pos422	0		H	posnegneg	31	3.56851e+06	3.86793e+06	4.08316e+06	3.73393e+06	3.77865e+06	3.17783e+06	3750637	3.05121e+06	2.63846e+06	3.98812e+06	3.50617e+06	3.72682e+06	3.94159e+06	2.61592e+06	4.07235e+06	3.28156e+06	3123392	3.61005e+06	3.46808e+06	3.52248e+06	3.08775e+06	3.2348e+06	3.2311e+06
173.105	5.76304		0		0.4			0.389343	#N/A		cor-0'cor-5'cor-10'cor-20'cor-40	Hexanoylglycine	0	bp				1.43	1.43	4296476	pos423	0		H	pos	31	297086	323085	363595	410514	424869	489216	353470	319296	256477	413886	286355	476365	394692	245479	407903	499716	382268	345080	283783	264850	316563	642173	419902
155.923	30.9518										cor-0'cor-5'cor-10'cor-20'cor-40'QC		0	bp				0.3	0.37	4267307	neg257	0			neg	31	2335592	2502693	2.30788e+06	1.58369e+06	1.4135e+06	3.02095e+06	2.33603e+06	2.33376e+06	1.29244e+06	3.21716e+06	1.75797e+06	2.64834e+06	1.65884e+06	1.11555e+06	1.72852e+06	3.09661e+06	1.93368e+06	2.73649e+06	1.71283e+06	1.34932e+06	1494077	3310434	2.72808e+06
132.09	22.9719		0		0.2			0.162486	#N/A		cor-0'cor-5'cor-10'cor-20'cor-40'QC	L-Ornithine	0	bp				0.14	0.33	4232207	pos424	0		H	posneg	31	2.96684e+06	2473870	2390624	1858516	2.74854e+06	3.24629e+06	2.46406e+06	2.03843e+06	1.31319e+06	3070245	2844286	2428876	2276457	1.99864e+06	3.21714e+06	3.27562e+06	2219476	1.95249e+06	1.80077e+06	2419924	2.32751e+06	2712032	4232207
532.263	12.0345							-3.57532			cor-0'cor-10'cor-20'QC		0	bp		C26	xC13xCl37	0.2	1.02	4226252	neg259	0			neg	31	529120	1.70488e+06	1.28738e+06	702888	1.1276e+06	455333	262635	1.34837e+06	4.22625e+06	973175	188504	694953	993701	84773.8	565506	1390759	311274	535071	976773	175399	562041	638474	365475
491.317	3.8125										cor-0'cor-5'cor-20'cor-40'QC		0	bp		C30	xC13x-NH3	0.36	0.84	4139720	pos425	0			pos	30	2548850	3.92784e+06	1.18493e+06	1.78125e+06	2681821	631323	2.3591e+06	3.63355e+06	2.85249e+06	441718	1.31778e+06	1.12558e+06	1.41913e+06	1.75978e+06	4.13972e+06	0	1127807	1.87034e+06	1108627	1.2783e+06	594273	85784.9	1.50834e+06
348.11	13.0036		0		0.2			-2.13614	#N/A		cor-0'cor-5'cor-10'cor-20'cor-40'QC	Camptothecin	0	bp				0.25	0.41	4132067	pos426	0		H	pos	31	2.19587e+06	2.75743e+06	2.30231e+06	2.87932e+06	2.28158e+06	3.64848e+06	3.10101e+06	1.87256e+06	1.49064e+06	3.7744e+06	1.29497e+06	1908019	2668704	1.28342e+06	2.22709e+06	2790986	1883970	1802946	3.49401e+06	1.55254e+06	2.31183e+06	3083589	2.29793e+06
320.051	16.0704	C8H17O11P	1	octulose 8-phosphate	7	0	0	0.280288	0		cor-0'cor-5'cor-10'cor-20'cor-40'QC	octulose 8-phosphate	0	bp		0.3	xC13	0.06	0.18	4126327	neg260	0		H	neg	31	2.04696e+06	2278604	2381360	2.85843e+06	2.43723e+06	2.40878e+06	2.62316e+06	2.25627e+06	1.7832e+06	2751658	2.19301e+06	2.38291e+06	2.99594e+06	2267105	2.62699e+06	2.45839e+06	2.66107e+06	2563159	2.58639e+06	2.68247e+06	2.65962e+06	2903279	2.92038e+06
244.046	15.0601							3.12274			cor-0'cor-5'cor-10'cor-20'cor-40'QC		0	bp			xNa+	0.15	0.61	4112838	neg261	0			neg	31	1.68926e+06	1.84849e+06	1.85246e+06	1.18688e+06	1.6115e+06	3.08228e+06	2.18705e+06	2.27932e+06	1.03372e+06	3.32886e+06	1.59085e+06	1.81313e+06	1.27059e+06	947705	1.87845e+06	3.36558e+06	1.77434e+06	1.85614e+06	1.30154e+06	1.04704e+06	1.19305e+06	4.11284e+06	1.6228e+06
281.272	4.49061	C18H35NO	2	[FA (18:1)] 9Z-octadecenamide	7	0	Metacyc_Lipidmaps_HMDB	-0.0388921	14.9264		cor-0'cor-5'cor-10'cor-20'cor-40'QC	[FA (18:1)] 9Z-octadecenamide	0	bp		1.3	xC13	0.09	0.67	4080937	pos427	0		H	posneg	31	2.12523e+06	921197	2.27972e+06	1.6782e+06	843044	629213	971120	451591	2.53497e+06	2.69108e+06	2.1481e+06	848563	1.03338e+06	1.51613e+06	1.24863e+06	1.4226e+06	3.3099e+06	959214	614148	2.41624e+06	2.76048e+06	4.08094e+06	1.4583e+06
475.403	4.15608										QC		0	bp				0.26	1.81	4056243	pos428	0			pos	21	1220679	2.15625e+06	4.05624e+06	0	1.31871e+06	0	0	833241	1.02907e+06	0	1.91014e+06	1.55184e+06	1336994	2.32799e+06	2.0262e+06	0	1.17615e+06	2.13444e+06	0	2.07181e+06	566730	0	478621
664.487	3.85138				0.1						QC		0	bp	xC13			0.7	0.7	4020257	pos429	0			pos	26	1115596	1110883	1.45314e+06	1.91417e+06	1.64435e+06	0	1061062	1110294	1.48654e+06	0	1.48403e+06	1228473	1.88149e+06	1426714	1.56302e+06	0	1.49313e+06	1.06802e+06	2.13555e+06	1.5789e+06	1.49442e+06	0	1.64692e+06
281.112	6.99785		0		0.2			-0.0375466	#N/A		cor-5'cor-10'QC	2'-O-Methyladenosine	0	bp				0.16	1.14	4008262	pos431	0		H	pospos	31	2044015	1.59953e+06	4.00826e+06	134369	2.71626e+06	51398.9	407942	965963	492104	117804	2.67215e+06	699568	823638	3506918	2797845	127287	1.48058e+06	1.75723e+06	90117.5	3.39048e+06	675825	67613.4	1.20189e+06
155.923	30.4764										cor-0'cor-5'cor-10'cor-20'cor-40'QC		0	bp				0.35	0.4	4003105	neg263	0			neg	31	2.74721e+06	2.83934e+06	2378207	1.81128e+06	2.05724e+06	3.39397e+06	2.665e+06	2.56322e+06	1.61223e+06	3704868	2.20907e+06	3153300	1.82478e+06	1.36332e+06	1.77352e+06	3.42515e+06	2506716	3387131	1648123	1.59074e+06	1.8282e+06	4003105	2426611
201.173	8.17464	C11H23NO2	1	Caproylcholine	7	0	HMDB	-0.184602	-6.1237		cor-0'cor-5'cor-10'cor-20'cor-40'QC	Caproylcholine	0	bp				0.41	0.66	3948884	pos433	0		H	pos	31	1.15756e+06	797545	2.98329e+06	1.60472e+06	1.01633e+06	1.02082e+06	1150870	1.02999e+06	2261626	769314	780843	1.56757e+06	1.94083e+06	1.04668e+06	1.26043e+06	909771	1.05453e+06	1.83353e+06	1.56577e+06	577143	787744	1.87659e+06	1.10203e+06
339.996	14.8186		0		0.1			-0.159723	#N/A		cor-0'cor-10'cor-20'cor-40'QC	beta-D-Fructose 2,6-bisphosphate	0	bp	x2-mer			0.16	0.86	3898714	neg264	0		H	neg	31	305481	176257	1.23292e+06	972354	546130	949149	356712	372819	601827	1.7446e+06	491971	1.2186e+06	2.95959e+06	1.24364e+06	1.99336e+06	2307922	727974	1.57931e+06	972331	2212750	1.97696e+06	1.50515e+06	1.89324e+06
243.22	4.55774	C14H29NO2	3	[FA amino(14:0)] 2-amino-tetradecanoic acid	7	0	Lipidmaps	-0.455514	-13.3237		cor-0'cor-5'cor-10'cor-20'cor-40'QC	[FA amino(14:0)] 2-amino-tetradecanoic acid	0	bp				0.16	0.66	3865099	pos434	0		H	pos	31	1.29431e+06	940818	436647	482807	1.24726e+06	2.51411e+06	1.32727e+06	1514036	970549	1.43729e+06	1.65472e+06	1064626	1.70472e+06	1.6024e+06	437563	1.27481e+06	2.87941e+06	2.06727e+06	2.01391e+06	925013	3.8651e+06	1.09776e+06	3210052
339.754	24.1037										cor-5'cor-10'cor-20'cor-40'QC		0	bp				0.14	0.35	3864794	pos435	0			pos	31	885940	1.60537e+06	2243556	1555465	1913549	2.75864e+06	2.79861e+06	2.24124e+06	2.23308e+06	2.61276e+06	1930154	2.95672e+06	2.35761e+06	2382603	2732092	2.63858e+06	2.4374e+06	3.86479e+06	2.42576e+06	2.36335e+06	2.3415e+06	2.70177e+06	2.78482e+06
252.122	9.98424		0		0.2			-0.312537	#N/A		cor-0'cor-5'cor-10'cor-20'cor-40'QC	Prolyl-Histidine	0	bp		-0.5	xC13	0.03	0.25	3843888	pos436	0		H	pos	31	2.3707e+06	2.5995e+06	2.28871e+06	2.66682e+06	2.28011e+06	3601531	2.48467e+06	2.59202e+06	1.73891e+06	3.21877e+06	1.66924e+06	2.52527e+06	2.9249e+06	1.56484e+06	2.78598e+06	2.46094e+06	2.00989e+06	1.95974e+06	2.52622e+06	2.03662e+06	2.08913e+06	2717320	2.4808e+06
177.866	31.6966										cor-0'cor-5'cor-10'cor-20'cor-40'QC		0	bp				0.17	0.29	3817593	pos437	0			pos	31	2.68871e+06	2.80724e+06	2.33811e+06	1957251	2118638	3089323	2.67104e+06	2.80739e+06	1.70436e+06	3237847	2480735	2.65519e+06	2.00286e+06	1.67789e+06	1.98057e+06	3.3385e+06	2.52309e+06	3.23406e+06	2007917	1.97e+06	2.0155e+06	3722735	2.72587e+06
129.152	8.20024	C8H19N	2	Octylamine	7	0	KEGG	0.0532375	7.96753		cor-0'cor-5'cor-40	Octylamine	2.8e-06	bp		1.9	xC13	0.6	0.6	3805871	pos438	0		H	pos	31	3.07373e+06	3.15069e+06	2976756	2985572	3.07566e+06	3.37096e+06	3.12116e+06	3.39788e+06	2.94034e+06	3.36923e+06	2.89547e+06	3094892	3.2992e+06	3.02331e+06	3100568	3.27091e+06	2.93685e+06	3199421	3284277	2.74935e+06	3.30377e+06	3.4635e+06	3.15696e+06
384.126	17.6712	C14H24O12	1	Acetyl-maltose	7	0	KEGG_Metacyc	-0.749862	41.4746		cor-0'cor-5'cor-10'cor-20'cor-40'QC	Acetyl-maltose	0	bp		15.7	xC13	0.21	0.37	3800087	pos439	0		H	pos	31	2.18713e+06	3.28896e+06	3.0337e+06	1.66313e+06	2.88689e+06	1.6769e+06	2.01818e+06	2.74871e+06	1.25115e+06	2.10671e+06	2.0379e+06	2.45106e+06	1.98121e+06	2695891	3.80009e+06	1.51322e+06	2.1367e+06	3.27735e+06	988888	2895207	1.88842e+06	1.97509e+06	2629399
329.053	9.18125	C10H12N5O6P	3	3',5'-Cyclic AMP	10	Yeastcyc	KEGG_Metacyc_HMDB	0.0771069	1.33835	1.50545	cor-0'cor-5'cor-10'cor-20'cor-40'QC	3',5'-Cyclic AMP	0	bp		0.6	xC13	0.07	0.48	3765264	pos441	0		H	posneg	31	513332	646287	1.23891e+06	2.00234e+06	1.08581e+06	1.60959e+06	823013	783727	983389	1.93393e+06	811560	954471	1.19317e+06	1.2638e+06	1.20964e+06	1.78259e+06	966142	975808	1.58615e+06	2481588	1.25278e+06	2.31879e+06	1.56605e+06
181.067	14.5326				0.2						cor-0'cor-20'cor-40'QC		0	bp	xC13			0.13	0.84	3763231	neg266	0			neg	31	991095	941892	810467	606164	664506	2257549	1.67379e+06	946366	477285	3.47181e+06	996013	880702	699280	634251	1.01722e+06	3.45503e+06	909789	1.20286e+06	707541	1.03594e+06	1.25022e+06	3.76323e+06	790644
275.721	10.911										cor-5'cor-10'cor-20'cor-40'QC		0	bp				0.11	0.18	3734819	pos443	0			pos	31	2496130	2.29453e+06	2.08788e+06	3227785	2.96767e+06	3.01771e+06	2.95098e+06	2.45143e+06	2.94656e+06	3.73482e+06	2.46339e+06	2716050	2.86257e+06	2.37776e+06	2.95407e+06	3.10221e+06	2.71747e+06	2.68787e+06	3178641	2.92759e+06	2965973	2.88107e+06	2.79145e+06
187.028	12.9873										cor-0'cor-5'cor-10'cor-20'cor-40'QC		0	bp				0.32	0.61	3722358	pos445	0			pos	31	1.74619e+06	1627830	2.38451e+06	1.10893e+06	2275856	426601	807367	1.41743e+06	2369668	648171	3116907	1453785	1260119	3.72236e+06	1.61962e+06	624441	2.57813e+06	1.90976e+06	1.03616e+06	3.6396e+06	1.36613e+06	802524	1.61569e+06
453.34	23.4141										cor-0'cor-5'cor-10		0	bp				0.18	0.18	3706452	pos446	0			pos	31	2.85848e+06	2.59221e+06	3.07166e+06	2.76226e+06	3.52918e+06	2.70223e+06	3.52494e+06	2.58067e+06	2967084	2.64812e+06	2.57449e+06	3.70645e+06	2.93713e+06	2.94327e+06	2.98603e+06	2531190	3.17282e+06	2234022	2.78203e+06	2.67781e+06	2.65668e+06	2.1549e+06	2.11206e+06
114.079	10.6545	C5H10N2O	3	3-Amino-2-piperidone	7	0	HMDB	0.664436	-38.3955		cor-0'cor-5'cor-10'cor-20'cor-40'QC	3-Amino-2-piperidone	0	bp				0.18	0.36	3691299	pos447	0		H	pos	31	2.55563e+06	3.28165e+06	3.19628e+06	1.47105e+06	3.63553e+06	1.5172e+06	1.5328e+06	2510138	1.56696e+06	1.58261e+06	1.7905e+06	1.91041e+06	2329449	2.25172e+06	3.6913e+06	1.87845e+06	1.93652e+06	2.47857e+06	2154791	2.48303e+06	2.16378e+06	1.2613e+06	2.08396e+06
360.066	10.1299										cor-0'cor-5'cor-10'cor-40'QC		0	bp				0.08	0.86	3658808	pos448	0			posneg	31	1.34496e+06	1.62007e+06	1.52903e+06	530692	1.21776e+06	1557701	607265	1.55983e+06	518330	2.09111e+06	264068	1.87016e+06	2.79632e+06	78441.5	2.26911e+06	1.77516e+06	941520	3658808	1076933	269317	654393	1.89134e+06	806569
488.313	4.76995										QC		0	bp		C28	xC13xCl37xC13	0.19	0.38	3658615	neg269	0			neg	31	3259230	2.94793e+06	2.75438e+06	3281452	3.21942e+06	1.27479e+06	3.31204e+06	2.75266e+06	3.52995e+06	1.604e+06	2.70115e+06	3.08789e+06	2.93e+06	3.54772e+06	3.26709e+06	865601	2.64404e+06	1.99707e+06	3.39345e+06	2.83923e+06	2774161	1.21831e+06	3.13643e+06
239.866	28.9217										cor-0'cor-5'cor-10'cor-20'cor-40'QC		0	bp			x-CO2	0.21	0.4	3657244	neg270	0			neg	31	1.48862e+06	1.55396e+06	1353200	1389510	1.64761e+06	2426154	2316554	2399915	1.12585e+06	3.33839e+06	1.73041e+06	2.0918e+06	1.80451e+06	1233451	1813421	3.34186e+06	1.88612e+06	2.41131e+06	1.53135e+06	1.29429e+06	1.50643e+06	3.33488e+06	1.94172e+06
152.059	8.26682	C7H8N2O2	3	N1-Methyl-2-pyridone-5-carboxamide	7	0	KEGG_HMDB	-0.233961	1.36492		cor-0'cor-5'cor-20'cor-40'QC	N1-Methyl-2-pyridone-5-carboxamide	0	bp				0.17	0.86	3656946	pos449	0		H	pos	31	1.141e+06	1.35969e+06	1.2941e+06	364939	957996	481874	888251	925969	448355	402791	1865856	500829	648051	3.65695e+06	1.40428e+06	471965	1.12959e+06	851857	303586	2.23214e+06	997310	283743	1.29325e+06
233.137	16.7096		0		0.2			-0.78547	#N/A		cor-0'cor-5'cor-10'cor-20'cor-40'QC	Lys-Ser	0	bp				0.47	0.47	3638685	pos450	0		H	pos	31	1.80238e+06	1.9297e+06	1918532	1.58821e+06	3.03581e+06	3.17818e+06	1.49393e+06	2.77185e+06	1.51838e+06	932903	2.91446e+06	3035524	3.20279e+06	2.71125e+06	3625482	3.1909e+06	2.89807e+06	3.09512e+06	3.02425e+06	2.93985e+06	3.05816e+06	3.40511e+06	3.30724e+06
254.225	4.20205	C16H30O2	59	FA(16:1)	7	0	KEGG_Lipidmaps_HMDB	-0.256263	0.578		cor-0'cor-5'cor-10'cor-20'cor-40'QC	FA(16:1)	0	bp				0.33	0.45	3606654	pos451	0		H	pos	31	3.50701e+06	3.14118e+06	3.41871e+06	2.2569e+06	2.39667e+06	2.20722e+06	3.60665e+06	3.55117e+06	2.09194e+06	2.47993e+06	1562655	2.35338e+06	2.81689e+06	1.65453e+06	3.32587e+06	764935	2.2162e+06	2408401	2539528	1.66594e+06	1.69099e+06	651021	3.09633e+06
846.466	3.91214				0.1						cor-5'cor-40		0	bp	xK+			0.8	0.95	3597595	pos452	0			pos	28	776654	1.008e+06	868238	618472	532448	3.59759e+06	1.02039e+06	976119	675143	3.07923e+06	0	969860	924494	551931	460178	82921.5	919485	1.30432e+06	620470	0	652908	69229.4	942213
348.047	14.9206	C10H13N4O8P	3	IMP	10	Yeastcyc	KEGG_Metacyc_HMDB	0.106367	-0.196796		cor-0'cor-5'cor-10'cor-20'cor-40'QC	IMP	0	bp		0.7	xC13	0.14	0.28	3592428	neg273	0		H	neg	31	764198	864411	994170	1.58274e+06	913158	992820	1.13892e+06	908049	774042	1.43153e+06	1.14572e+06	1.14623e+06	1.36401e+06	1.22366e+06	1.35809e+06	1.40041e+06	1.3786e+06	1.13942e+06	1548356	1.73061e+06	1.61844e+06	1.87095e+06	2.20493e+06
305.068	18.1116		0		3			-2.31472	#N/A		cor-0'cor-5'cor-10'cor-20'cor-40'QC	Atherospermidine	0	bp		-8.4	xC13	0.27	0.65	3559012	pos454	0		H	posneg	31	1.04655e+06	1.39983e+06	3.55901e+06	601608	1.56578e+06	1.30254e+06	1.51506e+06	1.16238e+06	1.07195e+06	1395687	1.36347e+06	1.03778e+06	781668	1.74022e+06	3.08727e+06	1.61971e+06	1.95679e+06	1.5916e+06	626667	1707426	1.78299e+06	1.67883e+06	971843
243.256	11.3025										cor-0'cor-5'QC		0	bp		C21	xC13	0.13	0.64	3545206	pos455	0			pos	28	2960174	3545206	2.86034e+06	2.44427e+06	2.74916e+06	171213	2.04116e+06	2.87321e+06	1.72918e+06	240540	2.07923e+06	2.88969e+06	2.95839e+06	1.85867e+06	2.80833e+06	0	2.26283e+06	2.39589e+06	2.27368e+06	1.59217e+06	2.0628e+06	0	2.06207e+06
204.057	7.65211										cor-0'cor-5'cor-10'cor-20'cor-40'QC		0	bp				0.1	0.57	3544901	neg275	0			neg	31	2.19068e+06	2.30511e+06	1.49594e+06	2.11173e+06	1951880	2.44623e+06	2172611	2256731	737615	2918180	1.0179e+06	1.81827e+06	2.3608e+06	874812	2.284e+06	1.93375e+06	930784	1.2359e+06	2457848	891026	1.89116e+06	3544901	1.50263e+06
417.898	19.1842										QC		0	bp			x-NH3	0.1	2.02	3524255	pos456	0			pos	30	100911	120026	84809.6	0	53119.8	2.10303e+06	479123	216982	86673.1	2.15633e+06	52093.6	127787	61367	98135.9	229191	2.53146e+06	110243	163710	81623	165298	197193	3.52425e+06	79722.5
332.079	12.862										cor-0'cor-5'cor-10'cor-20'cor-40'QC		0	bp		C11	xC13	0.17	0.31	3518491	neg276	0			negpos	31	159956	180433	181455	141658	134320	193475	189474	170217	108236	179855	132742	150321	124961	89588.5	147357	169618	142690	259332	165062	99041.9	166308	187731	238652
392.293	4.85754	C24H40O4	51	[ST hydrox] 3alpha,7alpha-Dihydroxy-5beta-cholan-24-oic Acid	9	0	KEGG_Metacyc_Lipidmaps_HMDB	-0.167113	0.988423		cor-0'cor-40	[ST hydrox] 3alpha,7alpha-Dihydroxy-5beta-cholan-24-oic Acid	0	bp		0.1	xC13	0.69	1.42	3517349	neg277	0		H	neg	29	964004	278131	1.55042e+06	1.15323e+06	830361	207956	49360.8	637864	3517349	315750	82040.2	921692	1292047	0	746110	326045	108113	706186	2.80571e+06	61430.1	842987	345686	505651
259.046	14.9601	C6H14NO8P	8	glycerophosphoserine	7	0	Metacyc	0.0569414	-1.42904		cor-0'cor-5'cor-10'cor-20'cor-40'QC	glycerophosphoserine	0	bp				0.05	0.73	3439557	neg280	0		H	neg	31	968912	1037015	1.14478e+06	854352	1.10003e+06	1.43477e+06	659672	1.325e+06	566861	1.77556e+06	616596	977978	1471959	524968	1.97549e+06	3.43956e+06	719492	824799	1.45421e+06	574093	858389	1.8308e+06	774534
140.983	29.1575		0		0.2			1.28226	#N/A		cor-0'cor-5'cor-10'cor-20'cor-40'QC	Carbamoyl phosphate	0	bp			x-CO2	0.15	0.32	3438388	neg282	0		H	neg	31	2.55703e+06	2.84705e+06	2388073	2.06804e+06	1.89412e+06	3.03834e+06	2.55589e+06	2.92687e+06	1.47996e+06	3.43839e+06	2.10974e+06	1.47269e+06	1.60326e+06	1.16212e+06	1.71779e+06	2.60108e+06	2.58187e+06	2777610	1.91276e+06	1.21716e+06	1.66433e+06	2.23729e+06	2.75776e+06
173.069	10.509	C7H11NO4	6	N-Acetyl-L-glutamate 5-semialdehyde	7	0	KEGG_Metacyc_HMDB	0.400834	16.3949		cor-0'cor-5'cor-10'cor-20'cor-40'QC	N-Acetyl-L-glutamate 5-semialdehyde	0	bp				0.14	0.34	3383637	pos459	0		H	posnegneg	31	1.8731e+06	2473275	2369118	2100851	2.35086e+06	2744966	3050772	2173737	1.51015e+06	3.38364e+06	1712343	2.49591e+06	2.54839e+06	1.77979e+06	2.20453e+06	3.02047e+06	2540340	1871971	2.78101e+06	2.13784e+06	2.15941e+06	3046973	3.06775e+06
340.255	22.6846		0		0.1			1.39068	#N/A		cor-0'cor-5'cor-10'cor-20'QC	5S,12R-dihydroxy-6Z,8E,10E,14Z-eicosatetraenoic acid-d4	0	bp	xC13			0.11	0.16	3351289	pos462	0		H	pos	31	2854857	2.55567e+06	3.35129e+06	3125938	3.1207e+06	2.58431e+06	2.63056e+06	2.57771e+06	2.64516e+06	2.55372e+06	2.65125e+06	2436313	2903766	3.01911e+06	3.26237e+06	2536814	2.36118e+06	2.35862e+06	3051600	2.60647e+06	3.32699e+06	3.28482e+06	2.29849e+06
131.114	21.0544				0.1						cor-0'cor-5'cor-10'cor-20'cor-40'QC		0	bp	xC13		x-NH3	0.11	0.32	3332294	pos463	0			pos	31	2188678	2.62546e+06	2.38423e+06	2.58528e+06	2.41656e+06	2.78993e+06	2.77684e+06	2.80065e+06	1.26022e+06	2.77118e+06	1.72402e+06	2.35824e+06	2.49692e+06	1.8443e+06	3.16901e+06	2487564	2.20412e+06	2.24897e+06	2.24352e+06	1653856	2.31144e+06	2.6204e+06	2330926
225.173	4.49962										cor-0'cor-5'cor-10'cor-40'QC		0	bp			x-NH3	0.36	0.77	3321377	pos466	0			pospos	31	2.10463e+06	2.63217e+06	2.519e+06	956274	1.42811e+06	798140	913658	1.03901e+06	3.32138e+06	877345	437934	1.22849e+06	2.9026e+06	683035	1.64175e+06	1.10653e+06	824639	1.36693e+06	1.47296e+06	1.51702e+06	1.21179e+06	97926.8	1.72547e+06
169.056	18.6081				0.2						cor-0'cor-5'cor-10'cor-20'cor-40'QC		0	bp				0.12	0.48	3312726	pos467	0			pos	31	2.35881e+06	2.92782e+06	2610936	1.77088e+06	2.07412e+06	2686439	2.68285e+06	2.17347e+06	1.89884e+06	2.78158e+06	1.71462e+06	2.31197e+06	2.51641e+06	1.58468e+06	2.75155e+06	2.54802e+06	2.18983e+06	2.49736e+06	1.53923e+06	1.65261e+06	624735	765463	2424946
231.834	28.2695				0.2						cor-0'cor-5'cor-10'cor-20'cor-40'QC		0	bp				0.09	0.48	3312042	pos468	0			pos	31	1.52378e+06	1.77693e+06	2.10181e+06	1.27107e+06	1.40954e+06	2.33905e+06	1.86473e+06	1.6074e+06	970162	3118091	1.05905e+06	1.67545e+06	1.75662e+06	1016458	2.08273e+06	2.50066e+06	1.70162e+06	2.05017e+06	1.54561e+06	1.11085e+06	1.3305e+06	2.90315e+06	1.53427e+06
679.385	5.19354				0.1						cor-0'cor-5'QC		0	bp	xC13			0.75	0.87	3310900	neg284	0			neg	28	1.9012e+06	1.21283e+06	1.17584e+06	1.39545e+06	925345	221129	1.95669e+06	2.61261e+06	1.1508e+06	136803	1.09242e+06	2.21112e+06	1.52611e+06	315868	3310900	0	748141	2.66573e+06	2.56487e+06	1.20926e+06	1.82374e+06	0	605583
503.686	20.1863										cor-0'cor-5'cor-10'QC		0	bp		C17	xC13	0.15	0.94	3306537	pos469	0			pos	31	945252	1352609	1.96696e+06	163054	632013	2.22172e+06	2.35422e+06	2.26178e+06	851523	2.43444e+06	1.31111e+06	815812	518560	2.02694e+06	2.78816e+06	1615884	527545	2.86711e+06	174513	3.30654e+06	1.04533e+06	1345044	337661
337.825	30.5836										cor-0'cor-5'cor-10'cor-20'cor-40'QC		0	bp				0.18	0.3	3291278	neg285	0			neg	31	1873294	2.40364e+06	1.63184e+06	1439198	1.58674e+06	2.41572e+06	1.92975e+06	2106030	1.34271e+06	2.72994e+06	1.71216e+06	1.81318e+06	1.73278e+06	1.2747e+06	1.64621e+06	2.76146e+06	1845400	2.346e+06	1.39378e+06	1387311	1.58813e+06	2.74236e+06	2081871
351.11	16.5603		0		#N/A			0.218963	#N/A	-1.63231	cor-0'cor-5'cor-10'cor-20'cor-40'QC	S-(2-Hydroxyethyl)glutathione	0	bp		1.1	xC13	0.08	0.24	3290427	neg286	0		H	neg	31	1879150	2.11499e+06	1.83144e+06	2328222	2.27944e+06	3.14245e+06	2.21111e+06	1.9565e+06	1.62371e+06	2.85451e+06	1.57632e+06	1.92959e+06	2.34706e+06	1.60087e+06	2.59476e+06	2.32457e+06	1.83534e+06	2194147	2.03357e+06	1.76567e+06	2.14682e+06	2.42241e+06	2.06484e+06
203.116	11.0596		0		4			0.527167	#N/A		cor-0'cor-5'cor-10'cor-20'cor-40'QC	O-Acetylcarnitine	0	bp				0.11	0.63	3257247	pos472	0		H	pos	31	2.15079e+06	1.14159e+06	977174	2.52044e+06	2.52321e+06	693346	1.9593e+06	868758	702282	960632	1.60062e+06	1.03934e+06	1.0655e+06	1540546	2.59693e+06	703254	1.9215e+06	974750	799269	1.74791e+06	2.07873e+06	864336	2.6134e+06
156.028	7.39814				0.2						cor-0'cor-5'cor-10'cor-20'cor-40'QC		0	bp				0.15	0.64	3236022	pos473	0			pospos	31	792001	1.04791e+06	975091	518488	827623	1.97747e+06	1.70931e+06	1.18425e+06	529418	2956176	961082	1.14998e+06	1.38813e+06	1.29162e+06	1.83682e+06	2911660	931317	1173214	1.05543e+06	1.05738e+06	1.56531e+06	3.23602e+06	956417
400.107	5.32018	C13H25N2O8PS	1	S-Acetylphosphopantetheine	7	0	KEGG_Metacyc	0.170958	0		cor-0'cor-5'cor-10'cor-20'cor-40'QC	S-Acetylphosphopantetheine	0	bp		2.4	xC13	0.12	0.29	3235870	pos474	0		H	pos	31	1.26703e+06	1532522	934159	1.57312e+06	1.24039e+06	1.38849e+06	1.63723e+06	1303607	803815	1.62747e+06	1295807	1.30365e+06	1.20602e+06	725432	1.76264e+06	1.66799e+06	1.54707e+06	1.28051e+06	1449995	1.07978e+06	1.06592e+06	1.22537e+06	3235870
133.074	8.17706	C5H11NO3	7	3-nitro-2-pentanol	7	0	Metacyc	-0.232248	6.25871		cor-5'cor-10'cor-20'cor-40'QC	3-nitro-2-pentanol	0	bp				0.14	0.93	3199918	pos475	0		H	pos	31	720410	659781	2.4887e+06	306182	3.19992e+06	493843	608472	407370	700477	245148	165486	578763	285155	256440	496333	652845	254466	446294	374791	1423862	1.05992e+06	422996	233608
207.147	7.65946										QC		0	bp				0.13	1.32	3172886	pos476	0			pos	30	719276	707202	3.17289e+06	1.56462e+06	523274	371260	275200	396549	2.96465e+06	338613	438060	1.36903e+06	2116025	426676	495770	360146	444054	1.49683e+06	1.35597e+06	298882	308404	3.05088e+06	318778
489.766	7.64338										QC		0	bp				0.73	0.79	3128262	neg291	0			neg	26	774361	1.12387e+06	1.00022e+06	697718	843445	0	402120	649923	913362	0	442430	675580	1.11234e+06	713059	714692	0	1.08311e+06	783854	1.38609e+06	676418	729244	0	1.38538e+06
98.048	9.10427	C4H6N2O	2	Imidazole-4-methanol	7	0	KEGG	0.0468093	-48.7942		cor-0'cor-5'cor-10'cor-20'QC	Imidazole-4-methanol	0	bp				0.17	0.98	3124747	pos477	0		H	pos	31	1.64511e+06	2.25862e+06	2936186	310684	2516273	235376	662404	1.6356e+06	628392	436109	2192654	857487	940266	3.12475e+06	2521038	534446	1.3389e+06	2.15532e+06	210010	2.38188e+06	789965	211749	1.27222e+06
453.34	23.8677										cor-0'cor-5'cor-10'cor-20'cor-40		0	bp				0.2	0.24	3116195	pos478	0			pos	31	2.42424e+06	2544263	2.48837e+06	2.64762e+06	2915376	2.32228e+06	2.06198e+06	2.15019e+06	2.45256e+06	2.09938e+06	2.16949e+06	2.18527e+06	2.68043e+06	2.46767e+06	2.54343e+06	2531190	2.32725e+06	2.28631e+06	2.43144e+06	2.27253e+06	2.49655e+06	2134550	1.87971e+06
161.105	13.2274	C7H15NO3	2	L-Carnitine	10	Yeastcyc	KEGG_Metacyc_HMDB	0.749345	0.0556101		cor-0'cor-5'cor-10'cor-20'cor-40'QC	L-Carnitine	0	bp				0.11	0.59	3114596	pos479	0		H	pos	31	1.30581e+06	980878	1.68621e+06	1.17198e+06	3.1146e+06	640291	1.18504e+06	1.33515e+06	1.54529e+06	686550	839883	1040181	1.18495e+06	615690	1.55526e+06	1.52905e+06	938195	1.30152e+06	2.05231e+06	717200	992019	520363	1.34328e+06
204.075	10.3698	C7H12N2O5	6	Aspartyl-Alanine	7	0	HMDB	-0.261065	-49.2221		cor-0'cor-5'cor-10'cor-20'cor-40'QC	Aspartyl-Alanine	0	bp			xK+	0.13	0.34	3093561	pos482	0		H	pos	31	1.48246e+06	2.01314e+06	2.18871e+06	1.77815e+06	1.70481e+06	1.94944e+06	1.78167e+06	1.64232e+06	1.28034e+06	2.60842e+06	1.29397e+06	1517284	2605898	932242	1768085	1.75982e+06	1.30305e+06	1.83315e+06	1.75055e+06	1.16018e+06	1.6355e+06	1857885	1.50192e+06
192.027	18.2595		0		0.2			0.602211	#N/A		cor-0'cor-5'cor-10'cor-20'cor-40'QC	Citrate	0	bp				0.16	0.52	3089151	neg293	0		H	neg	31	1084266	1.11397e+06	902658	1857700	1.48948e+06	2397382	1.80563e+06	1.30753e+06	691341	1.76834e+06	1121166	1.167e+06	919346	1.4229e+06	2.62555e+06	2.44023e+06	1.30706e+06	1.16796e+06	947126	1.76474e+06	1.98408e+06	2.07377e+06	1.04831e+06
246.159	7.65056										cor-0'cor-5'cor-10'cor-20'cor-40'QC		0	bp			x2+	0.2	0.24	3089106	pos483	0			pos	31	1694848	1.94663e+06	1.89227e+06	2178440	2.25795e+06	2.09287e+06	1.34887e+06	1.98156e+06	2.45295e+06	2.02984e+06	1.44598e+06	2585496	2.2229e+06	2.03139e+06	2.33433e+06	1.686e+06	1.88716e+06	1405901	2423166	2324379	1.98522e+06	1.44796e+06	1.82233e+06
621.309	4.92352										cor-0'cor-5'cor-10'cor-40		0	bp				0.68	0.75	3082183	pos484	0			pos	29	1.1034e+06	1.7483e+06	2759180	735987	1.19135e+06	137615	774773	1.61403e+06	885407	221316	1.23255e+06	1.00085e+06	1.36261e+06	1.5626e+06	3.08218e+06	130202	1.24189e+06	2.48098e+06	733857	1.12988e+06	931263	0	811323
154.065	18.5051				0.1						cor-0'cor-5'cor-10'cor-20'cor-40'QC		2.1e-06	bp	x2+			0.18	0.69	3081235	pos485	0			pos	31	813088	1.17165e+06	3.08124e+06	697592	1.13229e+06	851257	946658	838177	734655	1.39978e+06	563051	1.11255e+06	1.19189e+06	566816	1.22068e+06	1.21034e+06	867196	1.27849e+06	1.11053e+06	786278	847465	1311473	886987
336.162	15.8092										cor-0'cor-5'cor-10'cor-20'cor-40'QC		0	bp		C18	xC13	0.07	0.25	3079205	pos486	0			pos	31	2.10884e+06	2.32116e+06	2.96665e+06	2.2314e+06	2.22038e+06	1.94892e+06	2007756	1.77042e+06	1414251	2138527	1.5759e+06	2.07853e+06	2.87373e+06	2.05777e+06	2.77627e+06	1.87771e+06	1.70801e+06	1703437	2.99553e+06	1.88908e+06	1893004	2.54178e+06	2207518
268.204	4.19843	C16H28O3	3	[FA oxo(16:2)] cyclopentanehexanoic acid	7	0	Lipidmaps	-0.734849	-10.2482		cor-0'cor-5'cor-10'cor-40'QC	[FA oxo(16:2)] cyclopentanehexanoic acid	0	bp				0.36	0.87	3070258	pos487	0		H	pos	31	1.53199e+06	1.2521e+06	1.63555e+06	677387	1394703	647382	1109735	1.95637e+06	1.69226e+06	936368	908713	1.26664e+06	1.41874e+06	1.85562e+06	2346730	350962	829891	3.07026e+06	1065104	1.0273e+06	519549	319237	1.73157e+06
229.204	5.01001	C13H27NO2	4	2S-Amino-tridecanoic acid	7	0	KEGG_Lipidmaps	0.190335	-9.64948		cor-0'cor-5'cor-40'QC	2S-Amino-tridecanoic acid	0	bp				0.7	1.49	3066813	pos488	0		H	pos	31	370655	564046	414724	214958	555779	157208	480776	143939	329042	233366	55129.5	425101	3.06681e+06	177825	448399	410889	189134	915130	693396	128379	22721.4	144363	278972
115.027	14.6804		0		0.2			0.620616	#N/A		cor-0'cor-5'cor-10'cor-20'cor-40'QC	Maleamate	0	bp				0.34	0.34	3055705	neg294	0		H	neg	31	1.30522e+06	994907	1.39568e+06	1.22327e+06	1.6596e+06	2358759	1.19718e+06	1.14933e+06	1.31496e+06	1.16611e+06	1.8402e+06	1.9943e+06	2.24862e+06	1.54757e+06	2453604	2.16601e+06	1.59662e+06	2.15797e+06	1.88533e+06	1.57065e+06	1.82837e+06	2.57464e+06	2.25188e+06
197.202	14.4523										cor-0'cor-5'cor-10'cor-20'cor-40'QC		0	bp				0.1	0.25	3055106	pos489	0			pos	31	1.71128e+06	1.83683e+06	1.79895e+06	2655450	2225728	1.84489e+06	1.91745e+06	1.8853e+06	2.05032e+06	3.05511e+06	2.70208e+06	1.85522e+06	2.61942e+06	2107726	1.93732e+06	2459777	1.72885e+06	2.0595e+06	2162245	2.07804e+06	2.08606e+06	2.31017e+06	2080331
292.073	12.0798		0		#N/A			-1.91176	#N/A		cor-0'cor-5'cor-10'cor-20'cor-40'QC	2-(2-Methoxyphenyl)-4H-furo[2,3-h]-1-benzopyran-4-one	0	bp		-8.3	x2+xC13	0.05	0.43	3041227	neg295	0		H	neg	31	1.86887e+06	2.45674e+06	1.82862e+06	1.96355e+06	2.05911e+06	2770214	2.36147e+06	1.70509e+06	1.02612e+06	3.04123e+06	1.54899e+06	1.71951e+06	2061314	1.14473e+06	2.66765e+06	1.96132e+06	1.6687e+06	1.78748e+06	2152594	1.4653e+06	2.01898e+06	2.2833e+06	2.0932e+06
327.996	15.1163										cor-0'cor-5'cor-10'cor-20'cor-40'QC		0	bp				0.07	0.55	3031131	neg296	0			negneg	31	461195	467290	729472	1459050	822064	1248168	655639	701928	946521	1.9068e+06	644081	1.21425e+06	1.86e+06	1.27423e+06	1.38907e+06	1.76274e+06	885608	1.12444e+06	1.11791e+06	1.59926e+06	1.28203e+06	1.87973e+06	1192008
140.983	28.763		0		4			1.13047	#N/A		cor-0'cor-5'cor-10'cor-20'cor-40'QC	Carbamoyl phosphate	0	bp				0.06	0.35	3025330	neg297	0		H	neg	31	1.52773e+06	1.42914e+06	1.52861e+06	1.06307e+06	1455042	1895212	1.88829e+06	1.96439e+06	1.32876e+06	3.02533e+06	2.06174e+06	2.01998e+06	1.71255e+06	1.46993e+06	1.84127e+06	2.60108e+06	1.62586e+06	2075368	1.44159e+06	1.21716e+06	1.76271e+06	2590726	2.06845e+06
187.939	8.62557				0.4						cor-0'cor-5'cor-40		0	bp				1.16	1.16	3018578	pos490	0			pos	29	893759	1.83072e+06	1.34241e+06	547834	701367	2.64829e+06	1.20505e+06	1.34311e+06	1.28732e+06	1.61425e+06	43002.8	1.64173e+06	955390	412363	336782	2727695	1.40297e+06	1.13719e+06	856897	0	978460	3.01858e+06	1.26066e+06
468.063	10.8204	C14H22N4O8P2S	1	2-(alpha-Hydroxyethyl)thiamine diphosphate	7	0	KEGG_Metacyc_HMDB	-0.489435	0		cor-5'cor-20'cor-40'QC	2-(alpha-Hydroxyethyl)thiamine diphosphate	0	bp				0.04	0.89	3007255	pos491	0		H	pos	29	327223	630969	0	1.45926e+06	701030	2085927	1.59446e+06	805909	855261	1.76987e+06	198432	924288	1.31686e+06	0	965127	1.56239e+06	903628	360190	2.5313e+06	378877	1.2657e+06	2.05503e+06	1.22141e+06
147.053	10.4313		0		0.2			0.414895	#N/A		cor-0'cor-5'cor-10'cor-20'cor-40'QC	O-Acetyl-L-serine	0	bp				0.18	0.27	2987515	neg299	0		H	neg	31	1.95e+06	2704933	2.48353e+06	1.78409e+06	2.9798e+06	2060028	1.9209e+06	2.33822e+06	1.23316e+06	2.2899e+06	1699696	1.81328e+06	2872489	1.6839e+06	2987515	2.27586e+06	1.57627e+06	2.14188e+06	2.18974e+06	1.39862e+06	1.83064e+06	1795092	1.78338e+06
536.299	8.0582		0		3			0.826423	#N/A		cor-0'QC	Rhodexin A	0	bp				0.05	1.74	2985215	neg300	0		H	neg	29	109363	71636.3	142664	70135.5	271568	95178.6	0	116173	254259	89587.3	0	101950	119025	157562	97446.2	137152	70922	2.98521e+06	259556	149429	84637.4	396394	115508
197.902	15.5667				0.4						cor-0'cor-5'cor-10'cor-40		0	bp				1.14	1.14	2976524	neg302	0			neg	31	859982	92554	625315	311148	773247	262675	77993.5	91050.9	380348	199749	750845	404534	278404	197840	476325	172716	158067	117210	271251	84457.8	136479	825793	535390
129.152	15.5247	C8H19N	2	Tetraethylammonium	7	0	KEGG	0.179446	30.7665		cor-0'cor-5'cor-10'cor-20'cor-40'QC	Tetraethylammonium	0	bp				0.18	0.6	2974568	pos492	0		H	pos	31	1.36123e+06	1.3214e+06	2251903	1.1856e+06	2.16122e+06	872836	871505	2.01734e+06	2764198	1.19998e+06	806286	1.68364e+06	1.49699e+06	1.82034e+06	1.11082e+06	767002	1.26429e+06	1.98208e+06	2.97457e+06	675965	808022	1.07054e+06	1.3152e+06
426.088	16.5724	C13H22N4O8S2	2	Asp-Cys-Cys-Ser	7	0	Peptides	0.620915	3.45402		cor-0'cor-5'cor-10'cor-20'cor-40'QC	Asp-Cys-Cys-Ser	0	bp		2.6	xS34xC13	0.07	0.47	2969002	neg303	0		H	neg	31	1.80755e+06	2.05825e+06	2.86817e+06	1.4888e+06	2.44338e+06	874449	1.99654e+06	1.69176e+06	2.44528e+06	801782	1.72119e+06	1.78919e+06	1562358	2.34617e+06	2630562	838540	2969002	2.84782e+06	912426	2.01039e+06	1692501	941678	2.16176e+06
160.048	11.8068	C5H8N2O4	3	N-Formimino-L-aspartate	7	0	KEGG_Metacyc	0.209118	-32.5371		cor-0'cor-5'cor-10'cor-20'cor-40'QC	N-Formimino-L-aspartate	0	bp			x-NH3	0.34	0.34	2966406	pos493	0		H	pos	31	1.61316e+06	1.64617e+06	1.71005e+06	2.04502e+06	1.27682e+06	1.07649e+06	1.92359e+06	1.82808e+06	1.7365e+06	944298	1.31475e+06	1.79909e+06	2.20752e+06	1.99847e+06	1.8765e+06	1.00108e+06	2.06662e+06	1.84762e+06	2.4254e+06	1.61777e+06	1801235	1.22475e+06	2.4629e+06
312.314	7.67853										QC		0	bp				0.18	1.75	2923562	pos496	0			pos	20	911646	1.07247e+06	2.67301e+06	1.01184e+06	0	0	346986	988033	1.67033e+06	0	444864	1.03032e+06	2.92356e+06	0	0	0	288409	391070	1.99838e+06	0	0	0	503319
281.113	6.20475	C11H15N5O4	6	2'-O-Methyladenosine	7	0	KEGG_HMDB	0.361226	-44.4234		cor-5'cor-10'QC	2'-O-Methyladenosine	0	bp				0.2	0.96	2912532	pos497	0		H	pos	31	1.15771e+06	1.26364e+06	2.91253e+06	100630	1.5568e+06	120684	355503	975845	334012	145490	2.28672e+06	584907	647728	1.81313e+06	1.33263e+06	198174	1.10874e+06	1.23906e+06	82845.5	1.71496e+06	379201	257017	849793
236.083	16.9498	C8H16N2O4S	2	Met-Ser	7	0	Peptides_HMDB	0.0178076	29.5498		cor-0'cor-5'cor-10'cor-20'cor-40'QC	Met-Ser	0	bp		0.5	xS34xC13	0.06	0.19	2910934	neg306	0		H	neg	31	1.91128e+06	2.2513e+06	2238257	2.28038e+06	2.34211e+06	2714791	2.25387e+06	1.94123e+06	1.82158e+06	2.62383e+06	1767803	2.1174e+06	2644908	1.65946e+06	2605868	2.14843e+06	1.87782e+06	1.9164e+06	2614361	1.75238e+06	2.25259e+06	2.60758e+06	2211519
437.781	28.0387										cor-0'cor-5'cor-10'cor-20'cor-40'QC		0	bp				0.08	0.45	2897830	neg307	0			negneg	31	1.04934e+06	1187998	1.28392e+06	987173	1.01509e+06	2241446	1430453	1.06042e+06	666652	2.03012e+06	1.07706e+06	1.21447e+06	1.31229e+06	796121	1.42582e+06	1930960	1.40066e+06	1.18983e+06	1.22096e+06	821406	1.01932e+06	2.39233e+06	1.26158e+06
143.04	21.6006		0		0.2			-0.200276	#N/A		cor-0'cor-5'cor-10'cor-20'cor-40'QC	5-(2-Hydroxyethyl)-4-methylthiazole	0	bp				0.25	0.44	2893224	pos498	0		H	pos	31	2226567	2.31083e+06	2.1191e+06	1.36562e+06	1.46553e+06	2.43343e+06	1.8665e+06	2105057	960484	2.1632e+06	1.48214e+06	2.22891e+06	2.75225e+06	1.10552e+06	1.9208e+06	1.96569e+06	1.59016e+06	1.87363e+06	1.33623e+06	784374	537037	2.00341e+06	2.01255e+06
198.056	11.6891										cor-0'cor-5'cor-10'cor-20'cor-40'QC		0	bp				0.07	0.49	2892180	pos499	0			pos	31	1.74995e+06	1.71383e+06	2.89218e+06	867056	1.68443e+06	700581	1.0072e+06	1.12786e+06	795626	797712	1.37671e+06	1.24551e+06	1.37477e+06	1.36846e+06	1.78995e+06	746570	1508997	2.19631e+06	628457	1.4539e+06	900552	751328	1.52245e+06
217.095	11.9946							-3.52938			cor-0'cor-5'cor-10'cor-20'cor-40'QC		0	bp				0.34	0.53	2885205	pos500	0			pos	31	2.34161e+06	917431	1341210	1.88151e+06	2.00206e+06	1.57194e+06	2.8598e+06	986103	1.16862e+06	2.8852e+06	1.91533e+06	853341	1.56564e+06	1102779	2.39064e+06	1.15843e+06	2.41997e+06	1.20878e+06	1.50841e+06	1.57102e+06	1.84644e+06	1.21117e+06	2.64655e+06
297.89	18.315										QC		0	bp				0.06	1.53	2876157	neg308	0			neg	31	183226	224295	175467	124086	164549	1.92315e+06	693513	397956	170839	1.99672e+06	168122	212459	159959	197883	465591	2153003	185632	327190	183992	254439	424232	2.87616e+06	169413
176.068	12.3996		0		0.2			0.109557	#N/A		cor-0'cor-5'cor-10'cor-20'cor-40'QC	(2S)-2-Isopropylmalate	0	bp				0.11	0.63	2856851	neg312	0		H	neg	31	810802	882945	1.65476e+06	928247	1049110	899380	1.56896e+06	805837	820175	1.49095e+06	659386	559321	2.22697e+06	522282	920095	1.34062e+06	1242445	635372	2.4638e+06	856722	530675	1.06766e+06	2.19987e+06
260.137	11.1482	C11H20N2O5	4	L-gamma-glutamyl-L-isoleucine	7	0	HMDB	-0.273666	1.68012		cor-0'cor-5'cor-10'cor-20'cor-40'QC	L-gamma-glutamyl-L-isoleucine	0	bp				0.29	0.33	2855955	neg313	0		H	negneg	31	1.61803e+06	1.96688e+06	1.17192e+06	1.15621e+06	1.40201e+06	1.62664e+06	1.42799e+06	1.78668e+06	1.16273e+06	1.29999e+06	1.06528e+06	1143483	993068	884425	1.68943e+06	1.25373e+06	1.7256e+06	1.54066e+06	1.11209e+06	1.06427e+06	1.21585e+06	1.54706e+06	1.3919e+06
115.944	9.80664				0.2						cor-0'cor-5'cor-20'cor-40'QC		0	bp				0.15	0.15	2849562	neg314	0			neg	31	1.94758e+06	2117590	2.18297e+06	2.08939e+06	2.11371e+06	2.25503e+06	2.24663e+06	2280025	1969901	2.55316e+06	2.13565e+06	2342203	1.89624e+06	2.04809e+06	1.89085e+06	2.38024e+06	2.28915e+06	2.20791e+06	2.0109e+06	2.0051e+06	2.01308e+06	2293565	2.2875e+06
147.053	15.8478		0		0.2			-0.0143646	#N/A		cor-0'cor-5'cor-10'cor-20'cor-40'QC	D-Glutamate	0	bp				0.13	0.13	2834185	pos502	0		H	pos	31	2.22254e+06	2.43665e+06	2.25466e+06	2.7168e+06	2206128	2.81698e+06	2.18579e+06	2030787	1.99003e+06	2.51031e+06	2.28597e+06	2370193	2.60078e+06	1.97711e+06	2335338	2.52172e+06	2.19378e+06	2.40973e+06	2.22143e+06	2.07216e+06	2803972	2.80434e+06	2.29247e+06
89.0477	15.1873		0		0.2			0.321823	#N/A		cor-0'cor-5'cor-10'cor-20'cor-40'QC	L-Alanine	0	bp				0.4	0.4	2820076	pos503	0		H	pos	31	1.45039e+06	1796958	1.57553e+06	1.7319e+06	1.50361e+06	1.76422e+06	1.66254e+06	1.45256e+06	1.33415e+06	823705	359401	477194	576035	423042	989775	635544	1.48753e+06	1.36417e+06	2.03133e+06	1.60316e+06	1.3575e+06	1.51446e+06	1.60414e+06
130.027	14.4487		0		0.2			0.743626	#N/A		cor-0'cor-5'cor-10'cor-20'cor-40'QC	2,5-Dioxopentanoate	0	bp				0.27	0.57	2810395	neg317	0		H	negneg	31	1.08544e+06	999500	910908	932025	1.03947e+06	1.00467e+06	1.90163e+06	845109	667711	1.05892e+06	851506	1.22018e+06	693442	1.55423e+06	1.46967e+06	1.66715e+06	732026	953126	826540	2690413	1.61148e+06	1063884	1.56548e+06
174.1	13.4566	C7H14N2O3	8	N-Acetylornithine	7	Yeastcyc	KEGG_Metacyc_HMDB	-0.368794	9.63495		cor-0'cor-5'cor-10'cor-20'cor-40'QC	N-Acetylornithine	0	bp				0.14	0.36	2809897	pos504	0		H	pos	31	2.04297e+06	2.21936e+06	2.8099e+06	947067	2.37727e+06	1.387e+06	1.33438e+06	2.12551e+06	977469	1.14291e+06	2371968	1229474	1.2161e+06	2.53258e+06	2.67778e+06	1.47248e+06	1.47879e+06	1.82395e+06	1067483	2.06155e+06	1.42797e+06	932363	1.77422e+06
202.143	21.4195	C8H18N4O2	3	Arg-OEt	7	0	KEGG	0.0475843	10.7483		cor-0'cor-5'cor-10'cor-20'cor-40'QC	Arg-OEt	0	bp		-1.3	xC13	0.08	0.41	2800482	pos506	0		H	pos	31	1408831	1.70024e+06	1.82227e+06	1.50091e+06	1.65245e+06	1.78673e+06	2.11202e+06	1.21194e+06	1.07405e+06	2579897	1.52451e+06	1.74403e+06	1.95759e+06	1.41331e+06	2.80048e+06	2361538	1.73081e+06	1.45645e+06	1.68219e+06	1.34077e+06	2.05795e+06	1.83051e+06	1.59335e+06
286.214	4.10075	C16H30O4	4	2,3-Dihydroxycyclopentaneundecanoic acid	7	0	KEGG	0.306086	-24.0965		cor-5'cor-10'cor-40'QC	2,3-Dihydroxycyclopentaneundecanoic acid	0	bp				0.03	1.07	2774384	neg319	0		H	neg	31	648390	671994	2774384	248881	660452	297067	782560	1.12647e+06	1.00741e+06	228467	524899	467002	851949	780796	1.15616e+06	178944	678626	1.62665e+06	222391	656543	256468	152710	846691
460.319	4.53572	C28H44O5	9	Stoloniferone G	7	0	Lipidmaps	1.08534	11.8111		cor-5'cor-10'QC	Stoloniferone G	0	bp		-0.3	x-H2OxC13	0.38	1.27	2753417	neg320	0		H	neg	31	1.06075e+06	1.25886e+06	2.75342e+06	371656	960194	118354	407711	924331	778236	95811.8	1.42764e+06	789191	1.15796e+06	1.24297e+06	1.66985e+06	46100.6	872995	2.15783e+06	364502	933816	434018	49229.7	527041
309.303	4.4778	C20H39NO	1	N-Hexadecanoylpyrrolidine	7	0	HMDB	0.0138777	15.5354		cor-5'QC	N-Hexadecanoylpyrrolidine	0	bp				0.28	0.83	2746241	pos507	0		H	pos	28	752198	1.54191e+06	313798	97369.7	1.35422e+06	294866	591212	261825	656445	1119765	605951	0	430774	386896	0	381456	697702	1.55118e+06	0	494096	1295841	791758	1.04409e+06
548.325	9.3133										cor-0'cor-5'cor-10'cor-20'cor-40'QC		0	bp		C26	xC13	0.28	0.77	2723815	neg321	0			neg	31	878725	1.0941e+06	1.04592e+06	270257	662456	166865	528665	670549	389668	239471	2.2067e+06	504856	661332	2.72381e+06	1.82829e+06	180941	1181224	887710	134355	1908284	967061	321282	756442
112.064	8.50977										cor-0'cor-5'cor-10'cor-20'cor-40'QC		0	bp				0.05	0.29	2690750	pos509	0			pospos	31	704312	933916	1.18777e+06	1.01055e+06	942909	1.30322e+06	976586	837507	691501	1.35158e+06	743782	989887	1.23609e+06	880129	1.20266e+06	1305227	972170	1.18261e+06	1.32185e+06	1.0327e+06	1145335	1.37751e+06	1.50158e+06
161.069	8.89359		0		0.2			0.225896	#N/A		cor-0'cor-5'cor-10'cor-20'cor-40'QC	O-Acetyl-L-homoserine	0	bp				0.37	0.37	2689141	neg323	0		H	neg	31	1.1275e+06	1.97386e+06	1.37337e+06	1.40427e+06	1.45628e+06	1.14433e+06	1.913e+06	1.34254e+06	848882	1.72569e+06	992961	1.34812e+06	1.42348e+06	722589	1.48316e+06	1.24124e+06	957834	1.01204e+06	1.14968e+06	766931	1.51397e+06	1449993	1.62749e+06
117.058	4.49342		0		4.5			-0.603719	#N/A		cor-0'cor-5'cor-10'cor-20'cor-40'QC	Phenylacetonitrile	0	bp				0.4	0.63	2667369	pos511	0		H	pos	31	451657	1.50149e+06	1.29583e+06	1.33569e+06	921627	478984	1.00584e+06	977423	1.42128e+06	1.15817e+06	1.13993e+06	1.30174e+06	1.12678e+06	1.93859e+06	1.58782e+06	847968	1.52391e+06	972210	2.66737e+06	928397	368821	1.05683e+06	850759
112.052	8.39038		0		0.2			-0.28129	#N/A		cor-0'cor-5'cor-10'cor-20'cor-40'QC	Cyclohexane-1,3-dione	0	bp				0.27	0.69	2657392	pos512	0		H	pos	31	737051	324747	886272	2.08582e+06	770286	566221	635154	1.13374e+06	979253	2.25581e+06	1.7095e+06	1.99142e+06	2.65739e+06	1.41999e+06	2.53326e+06	2.33087e+06	1.59487e+06	2.08735e+06	2149766	1.4149e+06	1.86961e+06	2.18291e+06	741364
629.408	11.3827				0.1						cor-0'cor-5'cor-10'cor-20'cor-40'QC		0	bp	xC13	C22	xC13	0.25	0.34	2624266	neg326	0			neg	31	1.45754e+06	1.20274e+06	1.18989e+06	1.48978e+06	2303199	1.06206e+06	1.4087e+06	1.20675e+06	1779623	1.5984e+06	1.7945e+06	1.5908e+06	1.75659e+06	1.78513e+06	2.01844e+06	1.55595e+06	1.14125e+06	1.46001e+06	2.62427e+06	1475454	1.8499e+06	1.19627e+06	1.64106e+06
274.095	14.0161	C14H14N2O4	1	(1xi,3S)-1,2,3,4-Tetrahydro-1-methyl-beta-carboline-1,3-dicarboxylic acid	7	0	HMDB	-1.64762	19.1039		cor-0'cor-5'cor-10'cor-20'cor-40'QC	(1xi,3S)-1,2,3,4-Tetrahydro-1-methyl-beta-carboline-1,3-dicarboxylic acid	0	bp				0.18	0.44	2613496	pos516	0		H	pos	31	1.07145e+06	927801	1.06108e+06	2.6135e+06	1.31835e+06	1969304	1.40918e+06	871894	1170358	1719011	633291	1.17756e+06	1.47938e+06	665277	1.39661e+06	1.50469e+06	1.08487e+06	898189	1.40471e+06	657690	1.13089e+06	1.13844e+06	1.47587e+06
293.835	28.2507				0.2						cor-0'cor-5'cor-10'cor-20'cor-40'QC		0	bp				0.16	0.45	2605464	neg327	0			neg	31	1.16669e+06	1.31537e+06	1762290	1.17339e+06	1.10146e+06	2.32055e+06	1.31222e+06	1.04657e+06	643832	1.98352e+06	842965	1.13418e+06	847911	779159	1228099	1.70844e+06	1237258	1.31737e+06	1.31422e+06	805307	1.11808e+06	2.49978e+06	1.33569e+06
197.036	12.7727	C5H11NO5S	1	Tauropine	QC	0	KEGG_Metacyc	-0.118733	1.48805		QC	Tauropine	0	bp				0.09	2.24	2604082	neg328	0		H	neg	7	0	0	121474	0	0	0	0	0	0	0	0	0	0	0	0	0	287964	0	0	0	0	0	0
375.78	29.4695				0.2						cor-0'cor-5'cor-10'cor-20'cor-40'QC		0	bp				0.22	0.31	2600415	neg329	0			neg	31	1.55972e+06	1.5558e+06	1.38454e+06	1.11906e+06	1.14959e+06	2.12798e+06	1558553	1.49706e+06	952334	2.07244e+06	1.35531e+06	1493391	1.22448e+06	1.15495e+06	1316135	2.11624e+06	1.37902e+06	1.76829e+06	1.17923e+06	1099519	1.14735e+06	2.19446e+06	1.56265e+06
297.267	4.49514	C18H35NO2	11	3-Ketosphingosine	7	0	KEGG_Lipidmaps	-0.400812	0.345462		cor-0'cor-5'cor-10'cor-40'QC	3-Ketosphingosine	0	bp			xNH3x-H2O	0.13	0.96	2599286	pos517	0		H	pos	31	1.45703e+06	1.37237e+06	1.0188e+06	816611	1.28553e+06	389008	975588	1.41038e+06	743330	203755	997577	915857	1.06951e+06	562372	1.09695e+06	101660	2599286	674187	730781	670949	586080	130964	1.00714e+06
262.074	6.1926	C16H10N2O2	1	indigo	QC	0	Metacyc	0.121353	-11.8577		QC	indigo	0	bp				0.06	1.79	2593898	pos518	0		H	pos	27	356778	0	2.5939e+06	852680	372052	123784	144589	11397.2	17637.6	0	0	112766	340481	18068.7	620628	0	10460	15465.7	64945.2	80503.9	210314	14127.8	295762
312.176	3.87425	C17H28O3S	1	N-Undecylbenzenesulfonic acid	7	0	HMDB	0.523233	-4.54077		cor-0'cor-5'cor-10'cor-20'cor-40'QC	N-Undecylbenzenesulfonic acid	0	bp				0.3	0.76	2580260	neg330	0		H	neg	31	825567	758295	2.58026e+06	679889	1.81243e+06	427129	430669	686199	1.82824e+06	502700	192433	641151	822981	1.20236e+06	603106	229445	492550	667387	1.53947e+06	352156	523213	240767	1.00445e+06
113.048	8.08718	C5H7NO2	6	1-Pyrroline-2-carboxylate	7	0	KEGG_Metacyc_HMDB	0.0471115	-4.1774		cor-0'cor-5'cor-10'cor-20'cor-40'QC	1-Pyrroline-2-carboxylate	0	bp				0.04	0.4	2569281	pos519	0		H	pos	31	1.6772e+06	1.81397e+06	2.56928e+06	944555	2.29372e+06	928820	1.12811e+06	1.56786e+06	1.1207e+06	1.03798e+06	1.06496e+06	1.1612e+06	1.64557e+06	1.34531e+06	2.3444e+06	1307677	1.4442e+06	2.01845e+06	797760	1.45235e+06	1.08145e+06	680601	1.90642e+06
127.946	26.9254										cor-0'cor-5'cor-10'cor-20'cor-40'QC		0	bp				0.04	0.22	2566201	pos521	0			pos	31	1.6025e+06	1.29758e+06	1.52367e+06	1.89388e+06	1.86178e+06	1.79225e+06	2.09092e+06	1.4009e+06	1.89238e+06	2.15723e+06	1.89736e+06	2.30095e+06	1.81391e+06	1.57527e+06	1.51188e+06	1.91455e+06	2.24318e+06	2.4972e+06	2.05444e+06	1.78609e+06	1943712	2.52601e+06	2139885
261.913	29.3216				0.2						cor-0'cor-5'cor-10'cor-20'cor-40'QC		0	bp				0.23	0.37	2564113	neg332	0			neg	31	1.48947e+06	1.68388e+06	1615477	1.09324e+06	1.1733e+06	2.13575e+06	1.86485e+06	1.71327e+06	865147	2.36452e+06	1.25521e+06	1.60054e+06	1389819	916818	1.41484e+06	2.19665e+06	1442982	1.7929e+06	1142283	924777	1098580	2326700	1.73933e+06
539.419	3.85406										QC		0	bp				0.19	1.28	2562764	pos522	0			pos	26	620393	557868	2562764	1561025	877432	0	413904	574021	2.53497e+06	0	642543	1432591	1.45686e+06	676114	762506	0	586773	1.14306e+06	1.27804e+06	853972	834135	0	648780
147.053	17.3351		0		0.2			-0.134049	#N/A		cor-0'cor-5'cor-10'cor-20'cor-40'QC	D-Glutamate	0	bp				0.08	0.16	2556299	pos524	0		H	pos	31	2.25255e+06	2.30547e+06	2.41954e+06	1.82417e+06	2.03756e+06	2.5563e+06	1.8078e+06	1.70347e+06	1.7359e+06	1.85989e+06	2.23577e+06	2015332	2.01264e+06	1.88137e+06	1.72889e+06	2.26305e+06	2369175	2.26007e+06	1.53337e+06	1.69578e+06	2.07862e+06	2.08225e+06	2.30691e+06
169.035	14.244				0.1						cor-0'cor-5'cor-10'cor-20'cor-40'QC		0	bp	xNa+			0.11	0.18	2553498	pos525	0			posneg	31	1.91742e+06	1.88521e+06	1.81914e+06	1.98742e+06	1.83578e+06	1.37431e+06	1.67675e+06	2091598	2.14846e+06	1.46839e+06	2272714	1.92226e+06	2.5535e+06	1.98128e+06	2.09456e+06	1.6074e+06	1.9852e+06	1.68768e+06	1.85213e+06	2.09783e+06	1.80095e+06	1.33922e+06	1952799
370.007	17.6593	C7H16O13P2	3	D-Sedoheptulose 1,7-bisphosphate	7	0	KEGG_Metacyc_HMDB	0.178377	-14.9184	-1.76753	cor-0'cor-5'cor-10'cor-20'cor-40'QC	D-Sedoheptulose 1,7-bisphosphate	0	bp		1.6	x2+xC13	0.12	0.32	2539949	neg333	0		H	negpos	31	1.25629e+06	1.37305e+06	1.69893e+06	1.20572e+06	1362627	2.42303e+06	1.94127e+06	1.49572e+06	1.20856e+06	2539949	1.3547e+06	1.62861e+06	1.84905e+06	1529597	2183101	2156702	1.50074e+06	1.84514e+06	1.29826e+06	1308831	1.89135e+06	2.46496e+06	1.3182e+06
231.122	9.71214		0		0.2			-0.655421	#N/A		cor-0'cor-5'cor-10'cor-20'cor-40'QC	Ala-Ala-Ala	0	bp		0.8	xC13	0.32	0.32	2528465	pos527	0		H	posneg	31	1.91585e+06	2.0919e+06	1742966	2.07657e+06	1.65322e+06	1.25145e+06	2.3004e+06	1.7595e+06	1.16876e+06	1.9186e+06	1.81602e+06	1661966	2.52847e+06	1.17662e+06	1.8512e+06	1408183	1.76034e+06	1.29396e+06	1.01731e+06	1.40023e+06	862595	875268	1.643e+06
155.585	16.0733										cor-0'cor-5'cor-10'cor-20'cor-40'QC		0	bp				0.16	0.29	2527317	pos528	0			pos	31	1.29655e+06	2.45013e+06	1.63384e+06	1285978	2.09214e+06	2141285	1.46182e+06	1.37191e+06	1.24741e+06	1.78585e+06	1214314	1.59344e+06	1.20195e+06	1.21054e+06	2.00191e+06	1.65527e+06	1.44484e+06	1.86074e+06	1.4378e+06	1.1348e+06	1583741	2.4982e+06	1.23187e+06
283.288	4.62796		0		0.2			0.781273	#N/A		cor-0'cor-5'cor-10'cor-20'QC	Octadecanamide	0	bp				0.19	0.64	2517580	pos529	0		H	pos	30	2.06614e+06	1.60312e+06	1.53053e+06	1.62262e+06	1.6751e+06	124178	545098	1.20769e+06	983924	164226	1.19275e+06	1.12412e+06	2517580	967443	1.5634e+06	82462	1385093	1.25628e+06	1.43969e+06	828775	740451	159015	1.31206e+06
96.9929	28.9717		0		0.2			0.429952	#N/A		cor-0'cor-5'cor-10'cor-20'cor-40'QC	Phosphoramidate	0	bp				0.13	0.41	2511637	neg336	0		H	neg	31	1.82984e+06	1.40713e+06	1.53875e+06	1.63916e+06	1232887	1.40162e+06	1.54489e+06	1.21182e+06	570305	1.78208e+06	1.53869e+06	2.26269e+06	1.69869e+06	1327613	1.71509e+06	2.30406e+06	1.77091e+06	2182480	1.49724e+06	1.18698e+06	1.5783e+06	2.51164e+06	1723794
254.1	13.0124	C9H18O8	3	3-beta-D-Galactosyl-sn-glycerol	7	0	KEGG_Metacyc_HMDB	0.209427	15.4974		cor-0'cor-5'cor-10'cor-20'cor-40'QC	3-beta-D-Galactosyl-sn-glycerol	0	bp				0.25	0.26	2507424	neg337	0		H	neg	31	886493	1.1217e+06	1.22169e+06	1.73246e+06	1.04083e+06	1.55489e+06	1.15055e+06	951467	896335	1.20768e+06	862571	1.00716e+06	1.26192e+06	893271	1.20992e+06	1.06663e+06	993093	1.04405e+06	1.21465e+06	946599	1131509	1285987	1.9062e+06
328.309	4.99233										cor-0		0	bp				0.71	1.3	2486825	pos530	0			pos	25	401030	780089	945159	502298	509227	79506.8	361243	571553	2.48683e+06	0	333828	640083	912292	486110	524076	0	484740	523958	1.15409e+06	365210	0	0	588327
646.398	5.18564										cor-0'cor-5'cor-10'cor-20'cor-40		0	bp				0.7	0.71	2482964	neg339	0			neg	30	687002	922614	415509	1.15334e+06	611865	2.45423e+06	846097	651829	590915	1.33898e+06	192933	899132	1.37077e+06	160123	633793	1.23076e+06	803627	800578	1.69058e+06	296696	1.01513e+06	2482964	994859
219.906	19.8823										QC		0	bp			x2-mer	0.14	2.28	2462426	neg340	0			neg	31	15315.2	36559.6	20148.7	10984.2	15374	1393375	171451	58949.6	17051.5	1.02577e+06	18897.2	31636.6	11758.5	19093.2	57821.5	1.90419e+06	20196.1	45083.1	15373.8	20619.6	45523.4	2.46243e+06	21194.6
428.233	28.8676		0		3			1.8169	#N/A		cor-0'cor-5'cor-10'cor-20'cor-40'QC	Irbesartan	0	bp				0.19	0.19	2458308	pos533	0		H	pos	31	2.19745e+06	2.2471e+06	1.94749e+06	1.70634e+06	1.59966e+06	1.67014e+06	2328237	1.69527e+06	1.58458e+06	2.00738e+06	2.21349e+06	1.71133e+06	1.68494e+06	2.3321e+06	2224365	2233367	1.43379e+06	2.0299e+06	1587082	1.47322e+06	1.43266e+06	1.83448e+06	1.71037e+06
96.9929	29.6579		0		0.2			0.542331	#N/A		cor-0'cor-5'cor-10'cor-20'cor-40'QC	Phosphoramidate	4.17e-06	bp				0.12	0.3	2454362	neg341	0		H	neg	31	1.97292e+06	1.9412e+06	1.61185e+06	1.15423e+06	1.31753e+06	2.26488e+06	1.59603e+06	1.77028e+06	1.15667e+06	2.41994e+06	1.53869e+06	1.73141e+06	1.44205e+06	1182304	1.45584e+06	2165182	1.81759e+06	1.76537e+06	1.34744e+06	961544	1.43583e+06	2.24809e+06	2.11966e+06
145.085	14.9911	C5H11N3O2	3	4-Guanidinobutanoate	9	0	KEGG_Metacyc_HMDB	1.0549	0.274836		cor-5'cor-10'cor-20'QC	4-Guanidinobutanoate	0	bp				0.13	0.37	2447951	pos535	0		H	pos	31	1163308	1.59006e+06	1.52944e+06	809090	2.44795e+06	1.42494e+06	1.26197e+06	1405274	1.26595e+06	1.40139e+06	1.19549e+06	1.38937e+06	1.0725e+06	1.25974e+06	1.64e+06	1.57713e+06	1.23255e+06	1.44519e+06	1.0479e+06	1.13569e+06	1.21714e+06	1.19659e+06	1.17077e+06
176.105	5.34304		0		0.2			0.0307513	#N/A		cor-0'cor-10	L-Cladinose	0	bp				0.99	1.09	2436207	neg342	0		H	neg	31	827981	794456	738884	2.43621e+06	2127361	150628	159184	823072	114101	151020	372005	718947	1.26944e+06	118668	633466	157337	167018	783129	1.51429e+06	137220	320456	178803	142860
117.054	8.60407		0		3			0.076264	#N/A		cor-0'cor-5'cor-40'QC	Guanidinoacetate	0	bp				0.14	1.09	2435797	pos536	0		H	pos	31	1.20691e+06	959972	1776086	139695	1.52592e+06	143454	456744	908921	233964	185031	1.99892e+06	441127	322127	2.36165e+06	1.09203e+06	175918	915162	804152	133080	2.4358e+06	391523	112102	967647
729.531	7.50284		0		0.2			-0.208477	#N/A		cor-0'cor-5'cor-10'cor-20'cor-40'QC	PC(32:2)	0	bp				0.66	0.66	2416825	pos538	0		H	pos	31	936503	819580	1.16378e+06	949978	1.08797e+06	49414.1	646941	1.03216e+06	722591	63540.7	785024	877091	1.10815e+06	894504	1.39814e+06	26989.5	611790	1.19404e+06	1.02208e+06	880828	627922	25061.8	933411
165.043	5.09875	C8H7NO3	9	4-Pyridoxolactone	QC	0	KEGG_Metacyc_HMDB	0.410105	-43.3053		QC	4-Pyridoxolactone	0	bp				0.5	0.69	2412357	neg344	0		H	neg	31	916778	1.20321e+06	2412357	395236	1.15933e+06	370123	649247	987271	657757	426728	1.24199e+06	880740	684657	1317714	1.7207e+06	343734	865992	1.24236e+06	398210	1.22609e+06	460096	319133	980447
389.952	18.0241	C5H13O14P3	2	5-Phospho-alpha-D-ribose 1-diphosphate	QC	Yeastcyc	KEGG_Metacyc_HMDB	0.745315	-25.6075		QC	5-Phospho-alpha-D-ribose 1-diphosphate	0	bp				0.05	1.6	2401790	neg345	0		H	negpos	31	85092.4	100567	84222.5	95005.9	74834.6	1.0733e+06	541457	192311	107634	1.20348e+06	106981	143817	81299.9	136632	376110	1.43847e+06	119791	281070	153042	306712	365336	2.17466e+06	165074
259.153	8.32865		0		0.4			-0.298839	#N/A		cor-0'cor-5'cor-10'cor-20'cor-40	Ile-Ala-Gly	0	bp				1.09	1.09	2396972	neg346	0		H	neg	31	505052	539437	491057	501424	514496	491829	505375	386885	337467	496530	455911	352415	480228	341211	581666	388741	372399	451503	405100	366045	347598	396404	451581
105.079	18.6593	C4H11NO2	2	Diethanolamine	9	0	KEGG_HMDB	0.0911131	-0.0572327		cor-5'cor-10'cor-20'cor-40'QC	Diethanolamine	0	bp				0.13	1	2388722	pos539	0		H	pos	31	466885	334380	1.36263e+06	240152	2.38872e+06	337784	411134	267291	815823	201839	196299	479705	229114	331337	301758	629586	290909	404484	375592	709768	745388	232314	286492
303.036	14.7392										cor-0'cor-5'cor-10'cor-20'cor-40'QC		0	bp				0.14	0.53	2378747	neg347	0			neg	31	309890	264801	697266	493674	453460	755259	403589	443032	369118	932111	432658	888879	833858	482905	908979	1.16082e+06	645563	883711	641366	661419	621982	875072	882942
130.111	7.65549	C6H14N2O	3	N-Acetylputrescinium	7	0	HMDB	-0.162246	-45.2325		cor-5'QC	N-Acetylputrescinium	0	bp				0.39	0.85	2373321	pos540	0		H	pos	31	1.1466e+06	1.325e+06	943856	302499	1.20442e+06	1.18622e+06	1.20725e+06	811185	1.40865e+06	1.21671e+06	515932	716933	390088	158231	1232145	1.15803e+06	602269	841518	774021	212329	248294	829551	1.24674e+06
400.107	8.59342	C13H25N2O8PS	1	S-Acetylphosphopantetheine	7	0	KEGG_Metacyc	-0.377395	0		cor-0'cor-5'cor-10'cor-20'cor-40	S-Acetylphosphopantetheine	0	bp		1	xC13	0.68	0.68	2369816	pos541	0		H	posneg	30	1.43841e+06	1.26418e+06	885075	1.29769e+06	1.39725e+06	965785	1.33751e+06	1.34105e+06	622820	1.27509e+06	1.31331e+06	1.12532e+06	1.10505e+06	1.18406e+06	2.02295e+06	1.02998e+06	1.32923e+06	1.41265e+06	886254	1.33732e+06	1.15538e+06	1.2152e+06	1.86507e+06
359.303	4.19102										cor-0'cor-5'cor-10'cor-20'cor-40'QC		0	bp				0.34	0.6	2361135	pos543	0			pos	31	1.27829e+06	1.16754e+06	1.26333e+06	2.36114e+06	1.42283e+06	735729	818966	761358	1529199	1.65834e+06	519092	2.05734e+06	1.44507e+06	1.4897e+06	1.31592e+06	1.0641e+06	936247	1.20047e+06	1.12247e+06	851999	863752	1.40326e+06	709625
150.089	7.63537										cor-0'cor-5'cor-10'cor-20'cor-40'QC		0	bp				0.06	0.32	2334808	pos545	0			pos	31	1.22595e+06	1.24685e+06	1.06058e+06	1.14527e+06	1.1862e+06	1.24991e+06	1.01117e+06	1.28654e+06	2.13813e+06	1.79493e+06	1.31097e+06	1.22039e+06	1.47202e+06	1.50338e+06	1.4639e+06	2.33481e+06	1.37289e+06	1.27498e+06	1.20113e+06	1.52527e+06	1.05307e+06	1511146	972693
91.0633	18.248	C3H9NO2	2	3-Aminopropane-1,2-diol	7	0	KEGG_Metacyc	0.0966062	-6.83826		cor-0'cor-5'cor-10'cor-20'cor-40'QC	3-Aminopropane-1,2-diol	0	bp				0.35	0.35	2321646	pos546	0		H	pos	31	1.69074e+06	1972266	1.55012e+06	1.64648e+06	1.44077e+06	1.43004e+06	1.90813e+06	1.25179e+06	1.0726e+06	2.05841e+06	1.2019e+06	1557071	1.98035e+06	1.38768e+06	2.32165e+06	1.95885e+06	1746600	1.90689e+06	1.681e+06	1.42754e+06	1.03785e+06	1.53649e+06	1.22492e+06
370.222	5.15472		0		3			-0.076698	#N/A		cor-0'cor-5'cor-10'cor-20'cor-40	Ala-Leu-Ala-Pro	0	bp				0.69	0.69	2310710	pos547	0		H	pos	30	1.00601e+06	1254611	1.40345e+06	1.63479e+06	1.25978e+06	1.19313e+06	1589038	1099219	1.10273e+06	1.44718e+06	1.57762e+06	1.15501e+06	1.55667e+06	1.65436e+06	1.48587e+06	1.55073e+06	1.11111e+06	1222051	1.19834e+06	1.63911e+06	1.7162e+06	1.0918e+06	1.18001e+06
316.01	12.111										cor-0'cor-10'cor-20'QC		0	bp				0.6	1.24	2307000	neg353	0			neg	31	165588	701048	479666	212145	427675	139188	69703.1	542526	2.307e+06	355012	64435.1	224125	425762	27472	296569	521631	94006.5	233187	375462	40834.2	174069	264543	95929.8
767.115	12.6035		0		0.2			-0.0814084	#N/A		cor-0'cor-5'cor-10'cor-20'cor-40'QC	CoA	0	bp			x2+	0.16	0.8	2295104	neg354	0		H	neg	31	778655	730852	622650	602373	828772	1.90267e+06	1.29259e+06	472185	396200	2.2951e+06	554173	722399	715327	496492	1084333	1.8666e+06	655237	940434	735942	509308	911802	2.11191e+06	615643
181.041	5.06126		0		3			0.254934	#N/A		cor-10'cor-20'cor-40'QC	DL-Methionine sulfone	0	bp				0.65	1.29	2293713	neg355	0		H	neg	31	235742	266458	672896	153037	2.29371e+06	225600	61989.7	460355	1.07267e+06	241849	88546.7	372494	301154	98723.9	391218	742913	158226	255769	501126	109601	129190	79665.4	276968
843.172	14.0059										cor-0'cor-5'cor-10'cor-20'cor-40'QC		0	bp				0.4	0.66	2269743	neg357	0			neg	31	787825	929803	538680	451647	844801	2.11651e+06	1.06134e+06	896454	460913	2.26974e+06	719792	670611	619914	471839	1.33068e+06	1849148	756374	932834	654606	856139	699888	1.8936e+06	472989
165.079	14.0575	C9H11NO2	11	D-Phenylalanine	7	0	KEGG_Metacyc	0.633042	31.3815		cor-0'cor-5'cor-10'cor-20'cor-40'QC	D-Phenylalanine	0	bp				0.1	0.26	2241583	neg359	0		H	neg	31	1541809	2.05637e+06	1.9149e+06	1.68662e+06	1.83031e+06	1.62257e+06	1.85152e+06	1.82892e+06	1.06679e+06	2.1141e+06	1.87508e+06	1396614	1.35997e+06	1.50293e+06	2241583	1.7446e+06	2009305	1.49858e+06	1.27759e+06	1.84114e+06	1.42919e+06	1.58962e+06	1.48112e+06
243.198	4.89515	C17H25N	1	Phencyclidine	ppm	0	KEGG	-2.13819	-42.8012		cor-0'cor-5'cor-10'cor-20'QC	Phencyclidine	0	bp				0.22	1.35	2225083	pos553	0		H	pos	30	324497	223846	381444	292717	1.15738e+06	729768	657552	880200	95800.5	371740	470145	274205	899591	522158	123202	76929.2	1.53645e+06	1414599	413834	277348	1753010	214338	1.74986e+06
213.246	8.26312										cor-0'cor-5'cor-10'cor-20'cor-40'QC		0	bp		C15	xC13	0.19	0.63	2216969	pos554	0			pos	31	1542595	1.93383e+06	1618378	1.1068e+06	2.09465e+06	174216	1.37128e+06	1539242	952770	195582	1.21405e+06	1.48124e+06	1.30747e+06	644721	2.21697e+06	87570.2	1.36457e+06	1.27483e+06	1.32322e+06	646333	1478714	148765	1.31581e+06
266.052	9.81766				0.1						cor-0'cor-5'cor-10'cor-20'cor-40'QC		0	bp	xNa+			0.2	0.53	2216808	pos555	0			pos	31	496126	523028	635030	1129357	836978	743722	655471	502338	490737	973851	934577	578755	553073	959669	1.06824e+06	680008	507276	555087	998274	2127001	1282598	1.51325e+06	912860
514.337	20.8416							5.42682			cor-0'cor-5'cor-20'cor-40'QC		0	bp				0.09	0.21	2207433	neg364	0			negneg	31	1.65542e+06	1.41081e+06	1510050	1.75995e+06	1.92945e+06	1.65197e+06	1.37247e+06	1.38685e+06	1.56503e+06	1.58519e+06	1.3355e+06	1.37364e+06	2.07064e+06	1.77485e+06	1.80998e+06	1.21489e+06	1.46819e+06	1.37682e+06	2.08219e+06	1.75632e+06	1.71197e+06	1.40087e+06	1.383e+06
439.269	5.13439	C20H42NO7P	11	LysoPC(12:0)	7	0	Lipidmaps	-1.88327	22.0939		cor-0'cor-5'cor-10'cor-20'cor-40	LysoPC(12:0)	0	bp				0.68	0.68	2205136	pos557	0		H	pos	30	631485	773539	1298182	241209	407983	886467	724680	971556	699614	1.24917e+06	468309	1.23823e+06	2.20514e+06	416279	1.07304e+06	878767	668117	818360	1.35571e+06	434250	539731	909757	571904
289.164	7.99717	C12H23N3O5	5	Ile-Ala-Ser	7	0	Peptides	-0.0742532	-41.8304		cor-0'cor-5'cor-10'cor-20'cor-40'QC	Ile-Ala-Ser	0	bp				0.78	0.78	2198950	pos558	0		H	pos	31	630231	558956	660723	488556	535992	476457	664376	584452	406620	538453	636918	622100	636392	532585	828074	494252	663986	675470	849477	350044	528720	363456	787957
490.312	7.65729				0.1						cor-0'cor-5'cor-10'cor-20		0	bp	xCl37	C22	xC13	0.25	0.34	2189901	neg365	0			neg	31	1.35996e+06	1.21146e+06	1.01454e+06	1.05231e+06	1.14451e+06	822478	1185651	1290688	1.17184e+06	946218	1.04735e+06	1.60315e+06	1.97508e+06	1.62819e+06	1510947	784799	813367	1.24001e+06	2.1899e+06	1.0803e+06	1.44772e+06	1.42642e+06	1.11373e+06
358.23	29.6219				0.2						cor-0'cor-5'cor-10'cor-20'cor-40'QC		0	bp				0.45	0.45	2187350	pos559	0			pos	31	1.05539e+06	1.5371e+06	1.32699e+06	1.69088e+06	758012	1.88373e+06	1.29463e+06	986201	1068749	1.16943e+06	1.53284e+06	1677511	1.93386e+06	1.24503e+06	1.68343e+06	1.88637e+06	1.59723e+06	1.72933e+06	879660	995243	1.24801e+06	2187350	1.04127e+06
310.139	14.6401				0.2						cor-0'cor-5'cor-10'cor-20'cor-40'QC		0	bp				0.3	0.33	2172826	neg367	0			negpos	31	758053	948319	782689	673035	735435	533710	897281	1.42866e+06	867846	1.02538e+06	838041	1.03091e+06	1.8047e+06	1.35937e+06	2.03749e+06	1.89721e+06	980448	1.16947e+06	1.22338e+06	1267719	1.31315e+06	1.58678e+06	1.34228e+06
95.9204	28.5596										cor-0'cor-5'cor-10'cor-20'cor-40'QC		0	bp				0.12	0.3	2149167	pos565	0			pos	31	1.51392e+06	1.71259e+06	1.48034e+06	1.29616e+06	1.41004e+06	1.74498e+06	1.28733e+06	1.40317e+06	965009	1.9645e+06	1.31838e+06	1.43108e+06	1513822	1168141	1.65204e+06	2.08958e+06	1.33472e+06	1.57124e+06	1394389	1.17572e+06	1273400	2.05829e+06	1.78087e+06
221.013	7.63452										QC		0	bp				0.23	1.38	2148496	neg369	0			neg	24	239110	306312	1.1978e+06	0	420511	290502	0	220981	2.1485e+06	468605	0	507396	864056	0	799675	312832	85354.3	270741	1.7533e+06	0	239189	682844	265248
737.485	4.4494										cor-0'cor-5'cor-10'cor-20'cor-40'QC		0	bp		C40	xC13	0.5	0.58	2118399	neg371	0			neg	31	1.64074e+06	1235616	994178	1.53494e+06	1.24404e+06	426818	1.65291e+06	1.44052e+06	1.38769e+06	409598	1.15695e+06	1.4568e+06	1.62152e+06	1.02506e+06	1779579	134610	1.4825e+06	1.97597e+06	2.10334e+06	928286	1.19633e+06	58927.3	1.27208e+06
253.046	15.3206				0.2						cor-0'cor-5'cor-10'cor-20'cor-40'QC		0	bp				0.38	0.63	2117302	neg372	0			neg	31	1.76418e+06	457777	840707	451102	655071	1.20195e+06	783089	376248	388267	1.35414e+06	399551	896779	1.0756e+06	582505	1.20835e+06	1.29514e+06	507397	1.10239e+06	1.06567e+06	560448	652251	919156	970181
293.199	4.35319	C17H27NO3	4	(+/-)-5-[(tert-Butylamino)-2'-hydroxypropoxy]-1,2,3,4-tetrahydro-1- naphthol	7	0	KEGG_Metacyc	0.0600797	-26.6711		cor-0'cor-5'cor-10'QC	(+/-)-5-[(tert-Butylamino)-2'-hydroxypropoxy]-1,2,3,4-tetrahydro-1- naphthol	0	bp				0.31	0.79	2111040	pos567	0		H	pos	29	1.84338e+06	1.58261e+06	1.42637e+06	994807	1.3424e+06	377477	538863	1.55029e+06	778688	201209	452464	1.51072e+06	2.11104e+06	352944	1.7604e+06	148644	885408	1068729	934932	0	807228	279444	905857
482.28	4.70439				0.4						cor-0'cor-5'cor-40		0	bp				0.97	0.97	2106287	pos568	0			pos	28	726495	1.52768e+06	1.61511e+06	469808	986859	448827	938874	1.00814e+06	671889	417388	0	1.30967e+06	1207860	1.06664e+06	888137	268150	1.35715e+06	1.67277e+06	526198	0	616933	200139	1206311
679.508	21.795										cor-0'cor-5'cor-10'cor-20'cor-40'QC		0	bp				0.19	0.19	2104378	pos569	0			pospos	31	1.79773e+06	1.68766e+06	2004838	1.7024e+06	1.93067e+06	1.58998e+06	1.93897e+06	1.50554e+06	1.57245e+06	1.68e+06	1.4188e+06	1.46311e+06	1.97851e+06	1.92298e+06	1941862	1.47773e+06	1.46184e+06	1591680	1.65555e+06	1885918	1.95806e+06	1.59574e+06	1.72285e+06
197.069	11.278	C9H11NO4	4	N-Hydroxy-L-tyrosine	7	0	KEGG_Metacyc_HMDB	-0.838877	25.061		cor-0'cor-5'cor-10'cor-20'cor-40'QC	N-Hydroxy-L-tyrosine	0	bp				0.15	0.24	2104301	pos571	0		H	pos	31	1.14573e+06	1.39403e+06	1.62236e+06	1679549	1.66765e+06	1.48533e+06	2.1043e+06	1441426	1.27177e+06	1.53484e+06	1.3088e+06	1.42799e+06	1.38685e+06	1115411	2.08996e+06	1.33158e+06	1382475	1.57986e+06	1.47323e+06	972284	910497	1.67673e+06	1.68287e+06
408.179	11.4674		0		0.1			-0.676965	#N/A	2.60591	cor-0'cor-5'cor-10'cor-20'cor-40'QC	Phe-Trp-Gly	0	bp	x2-mer			0.11	0.38	2103747	pos572	0		H	pos	31	761114	1.00203e+06	738194	1075370	1.17999e+06	968279	1.1303e+06	819154	1.01207e+06	1.5053e+06	497894	1.00317e+06	977664	569432	1.45344e+06	1.06013e+06	995028	1.01518e+06	1.00274e+06	760537	1.13265e+06	1.12202e+06	1196620
371.34	4.49151										cor-5'cor-10'cor-20'cor-40'QC		0	bp				0.31	0.84	2096951	pos573	0			posneg	30	200904	1.00074e+06	0	629906	1.28098e+06	382726	887367	547078	445640	793106	1.13716e+06	764165	612580	1.28382e+06	438795	383388	1.90398e+06	1.12045e+06	937120	851399	1.18253e+06	406518	1.27188e+06
316.211	12.7612	C14H28N4O4	3	Ile-Gly-Lys	7	0	Peptides	-0.00872434	-1.10886		cor-0'cor-5'cor-10'cor-20'cor-40'QC	Ile-Gly-Lys	0	bp				0.08	0.22	2092772	pos574	0		H	pospospos	31	1.39253e+06	1.47433e+06	1.31049e+06	1.6582e+06	1.59208e+06	1.75711e+06	1.58851e+06	1.35325e+06	1.21269e+06	1.98205e+06	1.17627e+06	1.30842e+06	1.36859e+06	1.13193e+06	1.06237e+06	1.31491e+06	1.38335e+06	1352218	1.8217e+06	1.17282e+06	1.2251e+06	1.52047e+06	1.51023e+06
166.026	14.3963		0		4.5			-0.854948	#N/A		cor-0'cor-5'cor-10'cor-20'cor-40'QC	Phthalate	0	bp				0.1	0.12	2090308	neg373	0		H	neg	31	1.49279e+06	1.76075e+06	1.70088e+06	1.41654e+06	1.37106e+06	1.58562e+06	1.904e+06	1.73227e+06	1.44688e+06	1576180	1.75153e+06	1.83014e+06	1.77062e+06	1.79478e+06	1.65275e+06	1.5068e+06	1.80065e+06	1.86033e+06	1.50796e+06	1.62456e+06	1.48268e+06	1.67515e+06	1.76669e+06
166.027	13.7722		0		4.5			-0.36587	#N/A		QC	Phthalate	0	bp				0.07	0.16	2090308	neg374	0		H	neg	31	1.82821e+06	2.07964e+06	1647982	1.32802e+06	1.87773e+06	1532263	1.97589e+06	1.78758e+06	1.45593e+06	1.9402e+06	2.01116e+06	1.83014e+06	1847722	1.74646e+06	1.59386e+06	1.93764e+06	1.83867e+06	1.86033e+06	1.50983e+06	1.57479e+06	1.42113e+06	1.47639e+06	1.63642e+06
113.059	9.70038	C4H7N3O	1	Creatinine	9	0	KEGG_Metacyc_HMDB	0.201968	-0.201812		cor-5'cor-20'QC	Creatinine	0	bp				0.17	1.41	2079709	pos577	0		H	pos	31	150047	194782	358690	143202	2.07971e+06	306923	117547	241596	518110	205656	151026	306441	223380	152439	161155	886857	209801	154468	424213	39516	239288	172449	1.17249e+06
119.965	28.6788										cor-0'cor-5'cor-10'cor-20'cor-40'QC		0	bp				0.08	0.33	2078516	neg375	0			neg	31	1250186	1.50053e+06	1.38742e+06	1.04107e+06	1.3362e+06	1.74997e+06	1559250	1288094	884103	1.73544e+06	1.25437e+06	1.53294e+06	1.34884e+06	1192292	1522501	1.82935e+06	1.04452e+06	1.33681e+06	974756	1.06719e+06	1.1104e+06	2.07852e+06	1.43894e+06
552.293	28.6359		0		0.2			-1.39968	#N/A		cor-0'cor-5'cor-10'cor-20'cor-40'QC	Antioside	0	bp	xK+	2.2	xC13	0.17	0.41	2071944	neg376	0		H	neg	31	1.16948e+06	1.48088e+06	1.48755e+06	1.52907e+06	1.70903e+06	1.71923e+06	1.61008e+06	1.1306e+06	1.30321e+06	1.00508e+06	816313	1.25281e+06	1330136	1.53838e+06	1.85499e+06	489143	1.73076e+06	1.92927e+06	1.46769e+06	1.15724e+06	1.59864e+06	1.50264e+06	1.83795e+06
133.074	6.62847		0		0.2			0.217878	#N/A		cor-0'cor-5'cor-10'cor-20'cor-40'QC	3-nitro-2-pentanol	0	bp				0.23	0.26	2068489	pos578	0		H	posneg	31	1.33304e+06	1.73925e+06	1.72735e+06	1.64507e+06	1.76746e+06	1.37897e+06	1438221	1.4585e+06	957966	952562	1.19665e+06	1.57385e+06	1.44275e+06	1.14512e+06	2.06849e+06	1.11665e+06	1.18006e+06	1.60364e+06	1.26136e+06	1.26243e+06	1.33673e+06	1.02493e+06	1.43046e+06
498.276	4.66181										cor-0'cor-5'cor-10'cor-20'cor-40'QC		0	bp				0.52	0.67	2049604	pos580	0			pos	31	913289	1.12795e+06	1.55989e+06	361398	768904	1.11853e+06	304842	1.16387e+06	642241	306068	253170	980432	614658	863740	655040	162867	1.45053e+06	1.58478e+06	877488	171773	792779	804660	841281
134.058	8.45122	C5H10O4	9	Deoxyribose	8	Yeastcyc	KEGG_Metacyc_HMDB	0.757145	-20.4366		cor-0'cor-5'cor-10'cor-20'cor-40'QC	Deoxyribose	0	bp		-0.3	xC13	0.6	0.6	2045214	neg378	0		H	negneg	31	1.03816e+06	1.45215e+06	1.57209e+06	1.42565e+06	1.24639e+06	1.37846e+06	1.4959e+06	1196250	847012	1.67499e+06	1219733	1.3313e+06	1.5085e+06	1.02724e+06	1.67432e+06	1.44363e+06	1.4117e+06	1.29552e+06	1.42119e+06	1.38087e+06	1.34624e+06	1.56942e+06	1.50403e+06
238.062	15.6276		0		3			0.489399	#N/A	-2.28298	cor-0'cor-5'cor-10'cor-20'cor-40'QC	Cystathioninesulfoxide	0	bp			xACN	0.12	0.77	2038487	pos581	0		H	posneg	31	903508	1.08717e+06	2.03849e+06	293442	1.07126e+06	87414.9	371828	804671	556753	257558	1.18058e+06	659586	602709	1409920	962627	375644	814944	1.15892e+06	293768	1.35866e+06	423543	146153	690766
115.944	14.1717										cor-0'cor-5'cor-10'cor-20'cor-40'QC		0	bp				0.2	0.2	2019544	neg379	0			neg	31	1432996	1.73769e+06	1.44737e+06	1.37954e+06	1.34357e+06	1.43294e+06	1.62588e+06	1478886	1.32286e+06	1.55644e+06	1.51479e+06	1554910	1314140	1.36378e+06	1.51233e+06	1.50326e+06	1.73507e+06	1.51101e+06	1.47884e+06	1443235	1.72295e+06	1.47959e+06	1.51568e+06
437.781	30.369										cor-0'cor-5'cor-10'cor-20'cor-40'QC		0	bp				0.17	0.27	2011864	neg380	0			neg	31	1.16689e+06	1.21235e+06	1.24951e+06	1.11377e+06	1.03001e+06	1.47924e+06	1.30003e+06	1.2932e+06	1.05949e+06	1668043	1.2832e+06	1.27894e+06	1.19073e+06	1.07808e+06	1.2806e+06	1831381	1351475	1.6869e+06	1.12226e+06	1.09818e+06	1.0862e+06	1.99144e+06	1.32529e+06
217.923	29.5039				0.2			3.18262			cor-0'cor-5'cor-10'cor-20'cor-40'QC		0	bp				0.18	0.42	2010684	neg381	0			neg	31	1.06768e+06	1.21472e+06	1.25161e+06	946734	870503	1.59657e+06	1.29867e+06	1.18403e+06	600702	1.88195e+06	1.04882e+06	1.01998e+06	909632	688552	973387	1.50742e+06	1.02082e+06	1.35653e+06	754707	814504	705021	1.45332e+06	1.27661e+06
345.04	13.989										cor-0'cor-5'cor-10'cor-20'cor-40'QC		0	bp				0.27	0.31	2009883	pos584	0			pos	31	1265511	1.34309e+06	1.16445e+06	1.3044e+06	1.43399e+06	1.21223e+06	995316	2.00988e+06	1.61201e+06	1.30642e+06	1.0182e+06	1.93668e+06	1.04223e+06	1.24375e+06	860312	1364089	1238760	1.17555e+06	1.37812e+06	881350	1.46786e+06	1.32944e+06	1.27331e+06
753.471	4.16925				0.1						cor-0'cor-5'cor-40		0	bp	xK+			0.89	1.05	2007668	pos585	0			pos	27	1.34568e+06	1.76344e+06	1379871	367149	1.09451e+06	929740	1.11454e+06	1.25539e+06	1.28978e+06	688609	0	2.00767e+06	1.33554e+06	402837	631074	84640.1	1.19528e+06	1.58962e+06	1.18846e+06	0	769910	0	1.76652e+06
299.869	28.3169										cor-0'cor-5'cor-10'cor-20'cor-40'QC		0	bp				0.18	0.47	2004030	neg382	0			neg	31	1.0424e+06	1308079	1.21707e+06	967594	1.04517e+06	1651166	1.19932e+06	1.08211e+06	617320	2.00403e+06	839884	1.18672e+06	987491	746686	1.34179e+06	1.78148e+06	1.03974e+06	1.184e+06	893461	778244	929793	1.96064e+06	1.17394e+06
143.058	7.91314		0		0.2			-0.240703	#N/A		cor-0'cor-5'cor-10'cor-20'cor-40'QC	Vinylacetylglycine	0	bp				0.09	0.54	1998330	pos586	0		H	pos	31	534635	853139	931099	398512	759357	1.74536e+06	1591056	785932	849926	1.99833e+06	670559	794341	606105	867902	892172	1.58622e+06	1.05908e+06	777258	650821	758216	706983	1.49794e+06	710390
163.03	7.81162	C5H9NO3S	1	Acetylcysteine	9	0	KEGG_Metacyc_HMDB	0.278504	-2.11007		cor-0'cor-10'cor-20'cor-40'QC	Acetylcysteine	0	bp				0.51	0.81	1987956	neg384	0		H	neg	31	994992	1792471	1987956	272525	1.09921e+06	172551	261788	1.0944e+06	408682	228615	1.63045e+06	515995	570304	1413396	1.22754e+06	201212	970911	1.06717e+06	167711	1.11337e+06	347648	165802	536194
163.084	10.9657	C6H13NO4	10	Bicine	7	0	HMDB	0.1026	-26.2486		cor-0'cor-10'cor-20'cor-40'QC	Bicine	0	bp				0.1	0.85	1985126	pos587	0		H	pos	31	1.31578e+06	1.57041e+06	1.98513e+06	144869	1.72191e+06	178142	94385.4	900010	763582	169911	1.56901e+06	632146	425591	1.28193e+06	840051	414360	568945	1.42377e+06	559526	1.00849e+06	321110	192353	363650
387.121	13.5692	C14H21N5O6S	1	Glu-Cys-His	7	0	Peptides	-0.999409	-49.9535		cor-0'cor-5'cor-10'cor-20'cor-40'QC	Glu-Cys-His	0	bp				0.08	0.73	1984994	pos588	0		H	pos	31	612651	585911	500205	1.10898e+06	496673	1.40111e+06	683502	511697	405186	1458242	394881	508642	769489	257731	522080	1.26426e+06	360478	424276	1.78868e+06	321153	784199	1475024	703350
194.079	10.6575	C7H14O6	22	1-O-Methyl-myo-inositol	7	0	KEGG_Metacyc_HMDB	-0.532195	-22.5278		cor-5'QC	1-O-Methyl-myo-inositol	0	bp				0.24	1.16	1981255	neg385	0		H	neg	31	399189	469419	265771	238668	384323	1.60358e+06	663662	470324	253053	1.05437e+06	107125	546265	561407	72365.2	696905	1.57844e+06	212975	478787	341661	161854	395483	1.98125e+06	301556
122.04	7.16458		0		0.2			0.810898	#N/A		cor-0'cor-5'cor-10'cor-20'cor-40'QC	Thiodiglycol	0	bp				0.2	0.35	1955883	pos589	0		H	pos	31	1.28638e+06	1.37778e+06	1.86573e+06	692125	940780	947186	1.05316e+06	1.39164e+06	1242868	1.02488e+06	1.43756e+06	1.15119e+06	1.53153e+06	875998	1.39604e+06	961592	1.57632e+06	1.95155e+06	1175469	1.19143e+06	1.00881e+06	1.23357e+06	1.95588e+06
210.089	5.11151	C11H14O4	11	Sinapyl alcohol	7	0	KEGG_Metacyc_HMDB	-0.0614712	-22.9974		cor-0'cor-5'cor-10'cor-20'cor-40'QC	Sinapyl alcohol	0	bp				0.4	0.4	1950517	neg388	0		H	neg	31	799677	886746	1069180	828005	927870	514088	960284	714216	438724	670425	462087	807480	994918	592206	1.13587e+06	524960	885331	962213	1.13346e+06	477236	1155916	799409	1.31704e+06
211.142	5.32405				0.1						cor-0'cor-5'cor-10'cor-20'cor-40		0	bp	xNH3			0.93	0.93	1949124	pos590	0			pos	31	446947	363313	639381	585697	570903	303407	401001	529363	896846	261826	291708	454171	499621	394288	478847	596627	283010	450724	743653	437841	483171	351327	583175
154.035	15.0416				0.1						cor-0'cor-5'cor-10'cor-20'cor-40'QC		0	bp	xNa+			0.15	0.31	1948532	pos591	0			pos	31	1.59327e+06	1.40174e+06	1.05527e+06	1.94853e+06	1.36217e+06	753188	1.08667e+06	1.22791e+06	1.59514e+06	776133	1481408	1.57578e+06	1.20162e+06	1362147	890879	669353	1.45552e+06	1.13245e+06	1.36946e+06	1.37907e+06	1.52663e+06	737920	1.48594e+06
1104.4	20.185										QC		0	bp		C52	x3+x2+xC13	0.09	1.73	1947329	neg389	0			neg	31	168430	174352	142546	53739.2	99204.1	1947329	1.03322e+06	347307	119788	1922526	182710	235779	166079	134542	571506	1682028	142805	434173	81043.9	113420	367500	1.6523e+06	93070.2
441.15	9.89752										cor-0'cor-5'cor-10'cor-20'cor-40'QC		0	bp		C24	xC13	0.6	0.6	1946248	neg390	0			neg	31	679939	641572	678578	759191	745791	1.24751e+06	738226	552805	258818	1243521	366181	590025	477397	678396	1.14474e+06	794680	507386	748038	530662	1.04128e+06	736488	1.15674e+06	1.03258e+06
299.872	21.6844										QC		0	bp				0.35	2.38	1945902	neg391	0			neg	23	0	21274.4	4095.87	0	0	851922	72605.4	20430.1	0	733008	5690.01	13468.5	0	0	17592.9	1.32445e+06	0	12077.5	5395.03	10660.9	16458.7	1945902	0
163.121	21.7773										cor-0'cor-5'QC		0	bp				0.16	2.11	1938500	pos595	0			pos	23	25251.4	96207.6	263194	22182.7	118022	38554.1	29625.1	98008.3	56922.1	36674.7	99809.3	92055.2	1.9385e+06	0	0	63113.6	0	0	34793.2	772459	141607	0	635470
262.08	16.8256	C9H14N2O7	4	L-beta-aspartyl-L-glutamicacid	7	0	HMDB	0.0651653	-13.1833		cor-0'cor-5'cor-10'cor-20'cor-40'QC	L-beta-aspartyl-L-glutamicacid	0	bp		-1.1	xC13	0.06	0.36	1933285	neg394	0		H	neg	31	1.32332e+06	1.15389e+06	1.38428e+06	1.02124e+06	1.20258e+06	1.27592e+06	1.93329e+06	1.2957e+06	773749	1.33195e+06	1.40772e+06	1.20453e+06	1243114	1.04905e+06	1.32812e+06	1.16316e+06	1.37569e+06	1.03561e+06	1.06136e+06	1.04684e+06	961245	1.08473e+06	1.60728e+06
458.34	4.31272	C29H46O4	12	Stoloniferone J	7	0	Lipidmaps	0.831168	7.25107		cor-0'cor-5'cor-10'cor-20'cor-40'QC	Stoloniferone J	0	bp				0.53	0.53	1931616	neg395	0		H	neg	31	812108	1.06815e+06	982830	466907	1.01046e+06	504554	888478	845192	522004	487398	790821	908087	1.07196e+06	871187	863503	154420	812765	947653	928164	838629	426721	181639	764049
138.043	7.68034	C6H6N2O2	5	4-Nitroaniline	7	0	KEGG_Metacyc	0.400369	-1.84542		cor-10'cor-20'cor-40'QC	4-Nitroaniline	0	bp				0.05	0.85	1913269	neg397	0		H	neg	31	369482	457307	1.04975e+06	344946	1.91327e+06	349907	111704	360323	940540	335674	307108	764571	542174	877542	379476	584537	203362	510694	1.06258e+06	356910	508562	254401	518790
147.09	7.95571	C6H13NO3	4	N-hydroxyisoleucine	7	0	Metacyc	-0.157631	-5.83823		cor-0'cor-5'cor-10'cor-20'cor-40'QC	N-hydroxyisoleucine	0	bp				0.08	0.77	1911657	pos597	0		H	pos	31	423394	731116	1.38103e+06	283756	1.91166e+06	370210	431748	341205	385329	317605	222204	467074	420843	334540	346917	500866	317210	397817	446726	874791	624234	353601	268417
118.063	7.59846	C5H10O3	17	5-Hydroxypentanoate	7	0	KEGG_Metacyc_Lipidmaps	0.516836	-15.873		cor-0'cor-5'cor-10'cor-20'cor-40	5-Hydroxypentanoate	0	bp			xACNx-H2O	0.62	0.62	1906877	neg399	0		H	neg	31	628582	597823	1.67776e+06	843257	598320	1.01391e+06	594472	745523	1.12149e+06	1.13503e+06	553090	1.00539e+06	1.00832e+06	499292	753385	1297808	534478	812393	1.05366e+06	670504	542228	1.90688e+06	703538
143.058	8.59187		0		0.2			0.335288	#N/A		cor-0'cor-5'cor-10'cor-20'cor-40'QC	Vinylacetylglycine	0	bp				0.56	0.56	1894940	neg400	0		H	neg	31	1.46537e+06	1.71951e+06	1764496	1.49954e+06	1.53303e+06	1.81039e+06	836794	1.07544e+06	996382	751942	919149	1.56934e+06	1685477	541974	631206	522943	1.68751e+06	1.44903e+06	1.44919e+06	1194803	1.27262e+06	1.56266e+06	1599240
115.944	11.7285				0.2						cor-0'cor-5'cor-10'cor-20'cor-40'QC		0	bp				0.08	0.08	1894643	neg401	0			neg	31	1786157	1.77371e+06	1.62727e+06	1.66371e+06	1.61613e+06	1.81273e+06	1.5549e+06	1.54181e+06	1510793	1.7786e+06	1.67542e+06	1.82411e+06	1695625	1.59829e+06	1.68456e+06	1.82577e+06	1.73365e+06	1.82764e+06	1.55721e+06	1.56165e+06	1.70132e+06	1.56311e+06	1.81912e+06
209.126	9.68094										cor-20'cor-40'QC		0	bp				0.1	1.33	1894587	pos598	0			pos	30	366134	1.09789e+06	380480	141322	1.57536e+06	306372	60456.5	311135	1.89459e+06	277148	48647.9	227837	252913	0	487159	1.0292e+06	107884	227885	437212	56648.3	145795	115453	144839
227.091	9.11314		0		4			-0.30295	#N/A		cor-0'cor-5'cor-10'cor-20'cor-40'QC	Deoxycytidine	0	bp				0.16	0.73	1869838	pos600	0		H	pos	31	1.34248e+06	1.69497e+06	363130	423807	1.81807e+06	663458	1.11486e+06	1.34658e+06	288766	775470	1.37342e+06	380459	408216	1.19621e+06	1.10961e+06	498588	1.39324e+06	342084	435845	1.57e+06	1.26374e+06	147174	1.86984e+06
276.082	13.0963				0.2						cor-0'cor-5'cor-10'cor-20'cor-40'QC		0	bp				0.14	0.29	1866556	pos601	0			pos	31	773135	695524	760953	1.41589e+06	880732	1.04226e+06	1.44611e+06	1.10105e+06	1.60598e+06	944818	757519	856030	900512	794204	723906	942060	851529	761011	1.5082e+06	905895	868590	1186480	1.36584e+06
217.131	5.3164	C10H19NO4	1	O-Propanoylcarnitine	7	0	KEGG_Lipidmaps_HMDB	-0.175282	-32.4721		cor-0'cor-5'cor-10'cor-20'cor-40	O-Propanoylcarnitine	0	bp		0.3	xC13xK+	0.69	0.69	1861902	neg404	0		H	neg	30	1.12437e+06	1.39736e+06	1.32096e+06	1.02361e+06	1.4016e+06	769454	1.07333e+06	1.25196e+06	781966	807974	1.11554e+06	1.04589e+06	1.39038e+06	905191	1.72291e+06	791008	1.21554e+06	1136265	1.38804e+06	1.12891e+06	1.0495e+06	775063	1.32327e+06
488.202	5.06269		0		3			1.01373	#N/A		cor-0'cor-5'cor-10'cor-20'cor-40	Ala-Phe-Asp-His	0	bp				0.68	0.68	1848805	neg405	0		H	neg	30	707592	880821	1.20221e+06	655045	875315	956072	631323	999481	543108	1465709	715381	988544	1.15299e+06	667196	1.27621e+06	1.40171e+06	565515	1.19744e+06	728418	627424	780250	1.84881e+06	722311
212.072	4.69017										cor-0'cor-5'cor-10'cor-20'QC		0	bp				0.71	1.1	1825166	neg407	0			neg	30	897698	1.0296e+06	1.82517e+06	1.13695e+06	460918	399056	262073	550343	163309	541713	698902	1.48588e+06	1.28576e+06	172205	589439	1.2565e+06	27412.5	799571	907251	402180	855792	952516	101294
402.023	14.12	C10H16N2O11P2	1	dTDP	8	Yeastcyc	KEGG_Metacyc_HMDB	-0.610625	0		cor-0'cor-5'cor-10'cor-20'cor-40'QC	dTDP	0	bp				0.06	0.32	1818910	neg408	0		H	neg	31	1.0532e+06	1.14745e+06	1.10043e+06	760338	1.18778e+06	1144347	805730	978299	453052	1.0129e+06	707344	1130086	1.3786e+06	573382	1.20108e+06	1.02539e+06	1.04503e+06	1.01378e+06	908947	568286	816721	872916	1.02983e+06
298.047	17.8011		0		3			-2.04109	#N/A		cor-10'QC	Bowdichione	0	bp		-7.8	xC13	0.07	1.69	1810511	neg409	0		H	neg	30	567438	871401	1.81051e+06	57614.2	807583	28295.8	71384.3	515040	307364	45530	1.04241e+06	396000	437020	920119	1.06271e+06	63284.1	557941	926081	17768.8	825152	180357	24180.5	240796
343.12	15.8524				0.1						cor-0'cor-5'cor-10'cor-20'cor-40'QC		0	bp	xC13			0.11	0.49	1804630	neg411	0			neg	31	213856	155846	294532	621143	315822	386487	430031	242705	257365	647527	372990	413548	420789	572256	529880	690568	603300	432456	563276	928250	546066	833308	1.17696e+06
239.899	21.1885	H3O9P3	1	Trimetaphosphate	7	0	KEGG_Metacyc_HMDB	-1.13728	24.5189		cor-0'cor-5'cor-10'cor-20'cor-40'QC	Trimetaphosphate	0	bp				0.06	0.3	1794762	neg412	0		H	neg	31	1.21311e+06	1.12681e+06	1.11176e+06	1.01477e+06	1.24509e+06	1.30241e+06	1.38042e+06	1.03634e+06	729931	1.49402e+06	1.07744e+06	1.01089e+06	986976	957123	1473999	1.71401e+06	1.15567e+06	1.05568e+06	824613	1.10798e+06	1.16357e+06	1.79476e+06	1.04575e+06
190.041	8.12798										cor-0'cor-5'cor-10'cor-20'cor-40		0	bp				0.8	0.8	1792442	neg414	0			neg	31	462889	544122	136745	798547	578166	1.00652e+06	771171	496525	120408	1.32637e+06	256242	429354	558916	184136	567715	813439	177645	225300	736667	225478	619104	1.05065e+06	510968
342.116	15.0548		0		0.2			-0.0191239	#N/A		cor-0'cor-10'cor-20'cor-40'QC	Sucrose	0	bp				0.07	0.99	1787925	neg415	0		H	neg	31	436231	295823	705160	279766	1.44397e+06	380671	196032	543985	1.78793e+06	383161	192404	453132	406845	262963	389904	744460	550807	478244	655808	229440	584976	731057	239350
239.866	31.5877										cor-0'cor-5'cor-10'cor-20'cor-40'QC		0	bp				0.2	0.31	1772926	neg416	0			neg	31	1249044	1352163	1.1113e+06	847589	952383	1.52927e+06	1.26973e+06	1.29826e+06	851208	1.68167e+06	1.18076e+06	1304274	931021	810380	1.1076e+06	1.77293e+06	1.13094e+06	1.47117e+06	867173	785347	844509	1.59385e+06	1.28561e+06
188.043	10.8783										cor-10'QC		0	bp				0.23	1.56	1771932	neg417	0			neg	26	417762	387859	1.77193e+06	38008.8	401868	0	47028.4	315729	203484	0	557669	383902	346586	438409	489562	66733.8	223167	535853	48385.1	305423	61407.5	0	170630
111.993	13.9125	CH5O4P	2	Hydroxymethylphosphonate	7	0	KEGG_Metacyc	0.649316	4.00045		cor-0'cor-5'cor-10'cor-20'cor-40'QC	Hydroxymethylphosphonate	0	bp				0.06	0.7	1767424	neg418	0		H	neg	31	628260	671430	475194	513747	825525	1.24759e+06	543124	932986	497129	1.1856e+06	278956	1.49892e+06	1.76742e+06	138973	853061	1.04237e+06	773399	1.30868e+06	831754	364531	552400	965779	649928
402.225	4.19923	C20H34O8	2	5S-HETE di-endoperoxide	QC	0	Lipidmaps	0.308503	4.74445		QC	5S-HETE di-endoperoxide	0	bp				0.16	0.96	1760464	pos604	0		H	pos	23	290238	642878	1.30055e+06	0	1146636	66390.3	1.23307e+06	1.2387e+06	257837	0	1.13919e+06	862111	0	529680	410474	0	1205936	518130	878751	0	1.76046e+06	0	1568481
488.205	9.23178		0		3			0.682057	#N/A	-0.7108	cor-0'cor-5'cor-10'cor-20'cor-40'QC	Ichangin	0	bp				0.38	0.55	1760357	pos605	0		H	pos	31	1.47981e+06	1.05827e+06	1.13112e+06	323048	1.42709e+06	735162	629763	1222404	426285	724052	1.06256e+06	1.2953e+06	1.2264e+06	1124310	1.32542e+06	889627	714833	1.16471e+06	556676	1.10433e+06	443712	194950	747768
229.241	7.5959	C14H31NO	1	[SP (14:0)] 1-deoxy-tetradecasphinganine	7	0	Lipidmaps	-0.0486381	47.34		cor-5'cor-10'cor-20'cor-40'QC	[SP (14:0)] 1-deoxy-tetradecasphinganine	0	bp				0.2	0.31	1753040	pos606	0		H	pos	31	673778	934759	1.03745e+06	1.38528e+06	799418	1.33295e+06	751628	1.21688e+06	1.39564e+06	780778	835887	1.0535e+06	1027611	1.20501e+06	738126	779165	1.36757e+06	1.08327e+06	1.3064e+06	910356	875458	1.02658e+06	1.28703e+06
268.128	12.1858										cor-0'cor-5'cor-10'cor-20'cor-40'QC		0	bp				0.07	0.66	1727940	pos609	0			pos	31	1008762	1.07697e+06	1.72794e+06	256371	1.37413e+06	468754	493874	1.16568e+06	458380	582013	1.1769e+06	780329	695609	1294374	1.15923e+06	560923	752456	1.19477e+06	249315	1.55494e+06	611006	313339	707241
392.293	7.60426	C24H40O4	51	Ursodiol	7	0	KEGG_Metacyc_Lipidmaps_HMDB	-0.149269	23.3916		cor-0'cor-5'cor-10'cor-20'cor-40'QC	Ursodiol	0	bp				0.24	0.46	1711415	neg421	0		H	neg	31	1.18241e+06	765892	976619	786997	796852	645564	712645	843370	1.71141e+06	784137	633950	916861	901946	696574	844230	995240	828652	661239	1.25162e+06	586649	808702	1.0347e+06	1.204e+06
303.241	4.24848										cor-0'cor-5'cor-10'cor-20'cor-40'QC		0	bp				0.2	0.42	1709432	pos611	0			pos	31	624326	842271	1.00844e+06	769854	852745	1.07614e+06	927730	1.39462e+06	1.08215e+06	1.35051e+06	959349	1.03076e+06	1.25518e+06	852291	1190497	1.00795e+06	1107760	1.11118e+06	1.09757e+06	441287	1.24559e+06	1.28501e+06	1.70943e+06
101.993	26.9349										cor-0'cor-5'cor-10'cor-20'cor-40'QC		0	bp				0.03	0.27	1706220	neg422	0			neg	31	888779	877176	1.01535e+06	979348	946892	1.09387e+06	1.11613e+06	881788	1.15888e+06	1.27592e+06	1.09101e+06	1.28189e+06	1.11393e+06	838651	803338	1.23753e+06	1.10364e+06	1.65911e+06	1.23098e+06	1.01637e+06	1.05061e+06	1.52182e+06	1.35111e+06
261.132	16.4069		0		0.2			-0.574629	#N/A		cor-0'cor-5'cor-10'cor-20'cor-40'QC	Gammaglutamylornithine	0	bp				0.5	0.5	1705290	pos612	0		H	posneg	31	1.42543e+06	1.12739e+06	1.15154e+06	1.2838e+06	1.29295e+06	1.05588e+06	1.70529e+06	1.22343e+06	1.20308e+06	1.16806e+06	1.2111e+06	744045	1.11155e+06	527016	1.38009e+06	595140	1.33414e+06	1210764	1.13776e+06	1.63669e+06	1.42794e+06	1.05217e+06	741147
256.925	21.1899										cor-0'cor-5'cor-10'cor-20'cor-40'QC		0	bp			xNH3	0.07	0.26	1677868	pos614	0			pos	31	1.12353e+06	986612	970141	898880	1.16585e+06	1.13566e+06	1.18595e+06	961151	646610	1.16954e+06	891206	1.08223e+06	1073132	1.00068e+06	1.33933e+06	1.40735e+06	1.12707e+06	950278	994066	872362	1.06536e+06	1.67787e+06	909905
213.075	8.38542										cor-0'cor-5'cor-10'cor-20'cor-40'QC		0	bp				0.18	0.71	1670347	pos615	0			pos	31	1.27443e+06	1.1416e+06	834538	293307	1635129	870423	913727	1.46996e+06	233935	841121	1.42743e+06	289175	365334	1559625	1.42897e+06	730825	1.40743e+06	579573	297312	1.67035e+06	1.14416e+06	152167	1.24693e+06
125.999	7.20831		0		0.2			0.555305	#N/A		cor-0'cor-5'QC	2-Hydroxyethanesulfonate	0	bp				0.28	1.14	1659952	neg425	0		H	negnegneg	31	81125	86770.6	181486	367205	167120	73656.8	343444	81140	400159	73256.5	754148	324306	319704	190251	85469.8	106514	284936	294897	273776	411157	1.50784e+06	202928	180355
462.335	4.69974	C28H46O5	4	Stoloniferone F	7	0	Lipidmaps	0.589956	14.8889		cor-0'cor-5'cor-10'cor-20'cor-40'QC	Stoloniferone F	0	bp		3.1	xC13	0.45	0.52	1652895	neg427	0		H	neg	31	1.00035e+06	1.29976e+06	1652895	619043	1.20908e+06	426988	1.09675e+06	893678	894922	313498	806045	951506	1.06325e+06	858753	1.28382e+06	152367	788019	1.37498e+06	712074	701487	771484	142951	691224
378.157	17.0616	C14H26N4O6S	8	Ala-Met-Ala-Ser	7	0	Peptides	-0.509172	34.6304		cor-0'cor-5'cor-10'cor-20'cor-40'QC	Ala-Met-Ala-Ser	0	bp			x2+	0.45	0.56	1640279	pos618	0		H	pos	31	257530	1.01229e+06	423680	1.4794e+06	1.2159e+06	785446	471101	677589	517338	616294	144326	891361	1.42226e+06	514688	1018585	679816	274761	446655	1269949	626490	931916	715232	534388
203.002	13.1386				0.2						cor-0'cor-5'cor-10'cor-20'cor-40'QC		0	bp	xK+			0.23	0.72	1633170	pos619	0			pos	31	608434	739270	979149	623848	715484	258621	467753	777225	1.22978e+06	123720	836895	764055	534542	1.63317e+06	523921	356796	914581	972178	380896	1.04174e+06	645243	246928	782425
160.084	15.8547							-4.05851			cor-0'cor-5'cor-10'cor-40'QC		0	bp				0.09	1.02	1629758	pos620	0			pos	29	1.01606e+06	918440	1.42472e+06	70564	1.05151e+06	114110	325798	734603	270790	243383	1.14132e+06	278923	237346	1.62976e+06	1.51372e+06	260544	706662	693939	0	1.59315e+06	486682	0	649972
439.109	16.5736							6.1464			cor-0'cor-5'cor-10'cor-20'cor-40'QC		0	bp			x-NH3	0.16	0.65	1629068	pos621	0			pos	31	144647	82310.2	153546	465175	173229	223113	280919	177968	172350	568794	337449	248391	349894	435536	538558	745040	614957	320109	549984	1.08206e+06	722366	1050534	1.05351e+06
246.085	10.027	C9H14N2O6	2	5-6-Dihydrouridine	7	0	HMDB	0.0851891	-3.07888		cor-0'cor-5'cor-10'cor-20'cor-40'QC	5-6-Dihydrouridine	0	bp			xK+xNa+	0.26	0.26	1625874	pos622	0		H	pos	31	1.14294e+06	977219	1.15089e+06	1.30311e+06	1.13874e+06	1.11732e+06	1.00874e+06	952054	861830	1.11068e+06	735928	963058	1060418	885616	1.20361e+06	1.0801e+06	879799	836511	1.12849e+06	991371	1.14515e+06	1.19759e+06	1.06959e+06
166.047	12.4019	C5H10O6	8	D-Arabinonate	7	0	KEGG_Metacyc_HMDB	-1.63562	-12.6789		cor-0'cor-5'cor-10'cor-20'cor-40'QC	D-Arabinonate	0	bp				0.26	0.77	1616475	neg431	0		H	neg	31	395879	651838	639626	385680	455132	701782	560866	464353	495111	680094	378007	435257	493517	333930	814029	625934	380576	610278	406198	367094	467315	650640	387047
515.335	12.5436										cor-5'cor-10'cor-20'cor-40'QC		0	bp				0.15	0.19	1615257	neg433	0			neg	31	1.10853e+06	1.32138e+06	747796	1.2804e+06	1.19161e+06	1.3318e+06	1.43361e+06	1.19873e+06	1.14859e+06	1.22215e+06	1.15713e+06	1.12577e+06	1.47436e+06	1.37426e+06	1.36506e+06	1.16614e+06	1.17497e+06	1.05283e+06	1.36756e+06	1.11267e+06	1.28946e+06	1.25227e+06	1.08941e+06
177.064	13.2498		0		0.2			0.0591573	#N/A		cor-0'cor-5'cor-10'cor-20'cor-40'QC	4-Hydroxy-4-methylglutamate	0	bp				0.07	0.29	1611372	neg435	0		H	neg	31	853579	1.03776e+06	1.29561e+06	1.18802e+06	1.09049e+06	986632	1.03206e+06	874441	849830	1.16396e+06	1.34153e+06	1.00146e+06	541916	910669	1.36328e+06	1.06845e+06	1.00531e+06	874528	975274	1.39917e+06	1.13226e+06	1.19499e+06	1.24581e+06
559.312	7.80607		0		3			0.753386	#N/A		cor-0'cor-5'cor-10'cor-20'cor-40'QC	Asn-Leu-Lys-Trp	0	bp		-4.8	xC13	0.26	0.36	1607615	pos624	0		H	posneg	31	713659	1316441	1.34561e+06	1.08557e+06	1.12885e+06	713576	879938	895956	757058	808906	737573	924315	1.28098e+06	873596	1.11892e+06	360863	785355	973184	1.04771e+06	740970	818698	427841	707013
115.944	15.5454										cor-5'cor-40'QC		0	bp				0.18	0.18	1599502	neg438	0			neg	31	1291739	1.10832e+06	961745	998789	1.09707e+06	1.17175e+06	1.28299e+06	1.28241e+06	1.12837e+06	1.28137e+06	1.34798e+06	1.29977e+06	1.01113e+06	1.13472e+06	1062324	1.20782e+06	1.34261e+06	1.31299e+06	1.10974e+06	1.02218e+06	1.10537e+06	1.08711e+06	1.31744e+06
488.313	8.62722										cor-0'cor-5'cor-10'cor-20'cor-40		0	bp		C27	xC13	0.33	0.33	1598807	neg439	0			neg	31	1.15584e+06	1.40203e+06	1.20401e+06	1.21643e+06	1.34107e+06	1.36557e+06	1.14758e+06	1.0566e+06	1.05728e+06	1.46971e+06	1.14052e+06	1.15694e+06	1.42213e+06	1.42357e+06	1.59881e+06	1.23999e+06	1.16515e+06	1.5235e+06	1297073	1.57894e+06	1.16491e+06	1534233	1.06874e+06
110.037	6.49696		0		4.5			0.263302	#N/A		cor-0'cor-5'cor-10'cor-20'cor-40'QC	Resorcinol	0	bp				0.12	0.36	1595498	pos626	0		H	pos	31	741388	754237	633220	1.04736e+06	878499	1188010	871806	812977	551545	1.21074e+06	687884	681048	883975	563513	826850	1.28443e+06	748280	766027	823111	726634	893841	1595498	968154
741.506	10.622										cor-0'cor-5'cor-10'cor-20'cor-40'QC		0	bp				0.11	0.16	1591592	neg441	0			neg	31	1.04421e+06	991825	1.35069e+06	1.41083e+06	1.40343e+06	1.21652e+06	978237	1.25587e+06	1.19426e+06	1.02529e+06	1099777	1471248	1.59159e+06	1.18681e+06	1.24446e+06	1.10711e+06	1060088	976305	1.43918e+06	1.1797e+06	1.31978e+06	1.14945e+06	1.14201e+06
430.2	15.8516		0		0.2			0.915301	#N/A		cor-0'cor-5'cor-10'cor-20'cor-40'QC	Athamantin	0	bp				0.22	0.27	1586693	pos628	0		H	pos	31	436375	530117	703950	618184	444109	729911	567339	392954	349308	612596	419659	494368	529863	495394	743655	551158	653577	516820	602528	528299	640504	669750	1.00328e+06
195.09	5.23724	C10H13NO3	8	Damascenine	7	0	KEGG	0.707057	-7.68112		cor-0'cor-5'cor-10'cor-20'cor-40'QC	Damascenine	0	bp			xACN	0.3	0.51	1575446	pos630	0		H	pos	31	756258	1013877	475590	1.35887e+06	806468	355853	843731	681617	363345	579238	491526	1.04898e+06	672364	502449	952485	363394	563091	634388	789357	521896	648560	362780	846080
297.107	9.55827	C11H15N5O5	6	Psicofuranin	7	0	KEGG_Metacyc	-0.0994302	-13.9573		cor-0'cor-5'cor-10'cor-20'cor-40'QC	Psicofuranin	0	bp		0	xC13	0.14	0.28	1573080	neg442	0		H	neg	31	803404	928360	935933	802801	912965	1.00593e+06	887789	710554	511005	1.01561e+06	704905	797168	935083	703592	978161	1.09571e+06	745910	791883	940474	891689	760127	1.03671e+06	1.17765e+06
401.154	11.8869							-2.45756			cor-0'cor-5'cor-10'cor-20'QC		0	bp				0.07	0.96	1567662	pos631	0			pos	31	775882	902881	1.56766e+06	258929	892862	278363	378623	618880	439135	488917	885468	496076	651791	774512	847525	372844	666029	883646	229323	895173	403785	200716	460979
196.058	13.0032		0		0.2			-0.0616992	#N/A		cor-0'cor-5'cor-10'cor-20'QC	D-Gluconic acid	0	bp				0.22	1.14	1560903	neg445	0		H	neg	31	338242	585162	1.0899e+06	81450.2	413534	335870	819904	397477	323308	167068	550573	290413	243822	569752	705676	659519	397484	585326	84181.3	479628	510090	518476	270134
262.135	5.03312	C11H22N2O3S	5	Methionyl-Leucine	7	0	HMDB	-1.03235	-29.7697	-3.55013	cor-0'cor-5'cor-10'cor-20'cor-40'QC	Methionyl-Leucine	0	bp		0.3	xC13	0.21	0.39	1560131	neg446	0		H	neg	31	996099	1.15011e+06	793552	890521	791618	1.13187e+06	1.39571e+06	951728	583874	1.56013e+06	686557	970349	813242	846225	1.10488e+06	745188	914213	968629	740624	590421	811582	1.1334e+06	949904
227.091	5.3551		0		4			0.420109	#N/A		cor-0'cor-5'cor-10	Deoxycytidine	0	bp				0.67	0.87	1543734	pos632	0		H	pos	30	680383	714741	164074	194895	686583	457251	716350	729316	197642	387824	761147	252209	216963	595243	604211	424704	955040	172585	225448	856988	906481	30526.7	1.54373e+06
150.035	5.26117		0		3			1.22941	#N/A		cor-0'cor-5'cor-10'cor-20'cor-40'QC	2-hydroxy-4-methylthiobutanoate	0	bp				0.27	0.62	1542271	neg448	0		H	neg	31	879134	672883	618955	733370	702977	953234	1.05644e+06	678688	263842	1.54227e+06	533781	601923	606263	309183	801265	1.17306e+06	680521	804542	607027	780651	748687	1342655	576512
384.128	18.2039							4.24901			cor-0'cor-5'cor-10'cor-40'QC		0	bp				0.18	1.09	1537038	pos633	0			pos	31	384178	455468	831302	189052	521264	150044	254048	286840	666226	125197	472391	298859	286886	685999	542541	135899	362288	1537038	146000	583026	185053	148362	330279
262.116	15.6837	C10H18N2O6	1	D-Ornaline	7	0	KEGG_HMDB	-0.162015	-24.5263		cor-0'cor-5'cor-10'cor-20'cor-40'QC	D-Ornaline	0	bp				0.11	0.22	1533005	pos634	0		H	pos	31	1.10149e+06	1.15464e+06	985434	1.00697e+06	981018	911918	891669	954413	849596	933370	770979	827738	1.11635e+06	766184	1.21442e+06	883427	907199	1.00533e+06	940683	821221	1.0272e+06	912999	1.0954e+06
353.162	12.9415	C21H23NO4	3	(S)-N-Methylcanadine	ppm	0	KEGG_Metacyc	-2.13406	22.0196		cor-0'cor-5'cor-10'cor-20'cor-40'QC	(S)-N-Methylcanadine	0	bp				0.16	0.65	1528094	pos636	0		H	pos	31	699136	957288	1.52809e+06	197851	591478	371040	280256	554338	374505	515315	765933	417046	522971	893325	909049	428307	621295	880115	253092	684269	380256	389722	475217
261.141	10.6252				0.1						cor-0'cor-5'cor-10'cor-20'cor-40'QC		0	bp	xC13			0.09	0.4	1524211	pos637	0			pos	31	1.12852e+06	958168	1.08506e+06	1.3338e+06	1.14648e+06	1.14648e+06	1.40756e+06	893604	487795	1.13798e+06	744684	1.08792e+06	775281	826030	1.52421e+06	1.07178e+06	988321	936789	1.15214e+06	842503	1016573	989785	1.00834e+06
916.508	7.68749		0		0.1			0.322152	#N/A		cor-0'QC	PIP(34:1)	0	bp	x2-mer			0.32	0.69	1523850	neg452	0		H	neg	27	1.0602e+06	1027233	980082	1.26352e+06	1.34562e+06	43169.2	1.03744e+06	1.16484e+06	857541	0	1.08702e+06	1185773	1.25172e+06	1.46598e+06	1.15189e+06	0	969929	1.02979e+06	1.42866e+06	1.06733e+06	1.33356e+06	0	1.2324e+06
148.056	4.78938	C6H12O2S	10	3-(Methylthio)propyl acetate	7	0	HMDB	0.8836	-17.0694		cor-0'cor-5'cor-10'cor-20'cor-40'QC	3-(Methylthio)propyl acetate	0	bp				0.73	0.73	1518676	neg453	0		H	neg	31	183239	137078	163391	198998	100844	273907	461302	143850	86856.4	473673	334151	327727	324625	168980	256683	485954	386914	240708	353682	360694	390994	873350	759469
250.178	4.80564										cor-0'cor-5'cor-10'cor-20'cor-40		0	bp				0.67	0.67	1518216	pos638	0			pos	30	619314	525035	665577	748092	1.14474e+06	588115	1.00408e+06	979883	730736	1.00384e+06	726133	894845	863114	1.41162e+06	392923	580548	861652	1.09841e+06	1.51822e+06	520440	268121	585928	782431
203.056	12.7898				0.1						cor-0'cor-5'cor-10'cor-20'cor-40'QC		0	bp	xNa+			0.23	0.38	1515901	pos639	0			pos	31	816295	702640	617139	1.41576e+06	926021	900965	1064366	880509	1.5159e+06	977188	1187469	1.13815e+06	716304	921105	608715	555667	993151	669978	1126663	1.40753e+06	1096751	766250	1.1309e+06
258.086	9.82282		0		0.1			1.55578	#N/A		cor-0'cor-5'cor-10'cor-20'cor-40'QC	(1-Ribosylimidazole)-4-acetate	0	bp	x2-mer		x-FA	0.13	0.52	1513853	pos640	0		H	pos	31	561781	717798	1.13134e+06	573409	1.51385e+06	709092	411694	787863	789233	702221	396007	759386	962897	541837	716528	541802	381681	806570	874708	409282	542336	157259	504410
213.075	10.2971										cor-0'cor-5'cor-10'cor-20'cor-40'QC		0	bp				0.12	0.68	1511027	pos641	0			pos	31	1.19156e+06	1.45047e+06	913711	337153	1.51103e+06	521863	878466	1.18689e+06	239826	616346	1.30412e+06	275368	510700	857269	1.28877e+06	394718	1324232	506616	281501	1097782	1.00649e+06	108691	1.1583e+06
294.143	17.0029										cor-0'cor-5'cor-10'cor-20'cor-40'QC		0	bp				0.11	0.7	1501603	pos643	0			pos	31	672670	605559	459016	365248	485615	986364	763262	503176	277168	1.5016e+06	643535	570649	367154	594618	713509	1.00993e+06	460672	495482	466760	426533	990259	1.1792e+06	538122
560.198	20.7926							6.35936			cor-5'cor-10'QC		0	bp				0.02	1.13	1498781	pos644	0			posneg	28	326868	398992	1.29846e+06	0	195788	785814	837606	547699	229079	1.23465e+06	494591	322548	152882	832777	1.21768e+06	803519	197633	1.49878e+06	0	1137335	322558	631156	151867
194.079	13.3905	C7H14O6	22	1-O-Methyl-myo-inositol	7	0	KEGG_Metacyc_HMDB	-0.277144	2.48003		cor-0'cor-5'cor-10'cor-40'QC	1-O-Methyl-myo-inositol	0	bp				0.07	1.14	1495136	neg454	0		H	neg	31	477092	449263	1.03425e+06	367322	1.08592e+06	323902	139931	819450	1.19497e+06	449944	113331	823601	593479	86157.8	453396	808351	175800	709640	1495136	149159	164082	176328	211847
344.217	12.3504	C14H28N6O4	3	Ile-Arg-Gly	7	0	Peptides	0.0284933	-8.42176		cor-0'cor-5'cor-10'cor-20'cor-40'QC	Ile-Arg-Gly	0	bp				0.08	0.26	1488479	pos645	0		H	pos	31	1124496	1.27821e+06	1.11352e+06	1.32122e+06	886977	1.14735e+06	1.48848e+06	1.02285e+06	823248	1.01575e+06	1.01045e+06	1.07757e+06	1.03255e+06	768028	1.01748e+06	834434	1.12137e+06	1104107	1.3251e+06	778587	1.00404e+06	902947	1259873
217.923	30.4456							3.25191			cor-0'cor-5'cor-10'cor-20'cor-40'QC		0	bp				0.25	0.37	1486104	neg455	0			neg	31	933816	963259	979600	581875	653239	1.15654e+06	970936	1005627	498558	1359521	801474	986920	814946	646343	828834	1.38762e+06	931310	1.20816e+06	597491	651685	587470	1.30563e+06	1.10142e+06
210.056	7.10338	C8H18S3	2	Ethyl 1-(propylthio)propyl disulfide	ppm	0	HMDB	-4.14257	36.5145		cor-5'cor-10'cor-20'cor-40'QC	Ethyl 1-(propylthio)propyl disulfide	0	bp				0.32	0.84	1485997	neg456	0		H	neg	31	287427	401171	618980	105106	215923	1.18581e+06	581262	328245	495630	1.15704e+06	407950	390030	355791	868134	391428	1.0919e+06	514190	452682	285715	535884	261995	1.2278e+06	693192
88.0159	14.2853		0		0.2			-1.75347	#N/A		cor-0'cor-5'cor-10'cor-20'cor-40'QC	Pyruvate	0	bp				0.09	0.7	1479222	neg457	0		H	neg	31	413597	445194	488786	384035	361568	915672	576794	415219	240738	1.20144e+06	316159	298835	240487	382455	444966	846867	411962	498419	406958	461644	406636	1.47922e+06	392693
167.116	7.62452										cor-5		0	bp				0.39	0.58	1478884	pos646	0			pos	31	644469	889919	209960	463074	809023	889031	785348	918426	1.10695e+06	1.06675e+06	434642	374910	1.01962e+06	501502	517888	1.41669e+06	362392	777684	504756	1.03275e+06	481425	1.00249e+06	765052
128.095	12.9629	C6H12N2O	3	L-Lysine 1,6-lactam	7	0	KEGG_Metacyc	-0.467718	-4.63421		cor-0'cor-5'cor-10'cor-20'cor-40'QC	L-Lysine 1,6-lactam	0	bp				0.11	0.37	1478276	pos647	0		H	pos	31	1.28227e+06	1478276	623014	551277	985746	952888	1.02014e+06	904202	487265	1.07843e+06	922374	508221	482569	992214	1.11569e+06	984828	628766	594394	689191	570136	790432	505093	828935
306.109	8.14593							-2.84098			cor-0'cor-5'cor-10'cor-20'cor-40		0	bp				0.69	0.69	1474151	pos648	0			posneg	30	856788	1.19912e+06	1.43041e+06	752907	1.36657e+06	1.35271e+06	947044	656474	674269	1.25068e+06	210644	810980	976495	903180	160107	1.19593e+06	1166194	275054	687018	142824	1.04917e+06	1.31201e+06	1.20092e+06
404.156	14.3606							4.249			cor-0'cor-5'cor-10'cor-20'cor-40'QC		0	bp				0.16	0.77	1462240	neg459	0			neg	31	436220	521738	504492	404308	553439	837758	286957	900520	443368	831671	119249	547985	995916	148805	1.39924e+06	1.46224e+06	405312	658824	704834	282077	396376	1.01867e+06	501776
114.079	22.5167		0		0.2			0.433018	#N/A		cor-0'cor-5'cor-10'cor-20'cor-40'QC	3-Amino-2-piperidone	0	bp				0.11	0.34	1461486	pos649	0		H	pos	31	1221741	1.18786e+06	939612	822060	1.20592e+06	1.374e+06	1.44567e+06	1.07889e+06	618745	1.428e+06	1.19003e+06	1150343	884581	867978	1.22689e+06	1.42062e+06	924664	938949	748298	893763	962791	1.20373e+06	1.06543e+06
146.069	12.53		0		0.2			0.370144	#N/A		cor-0'cor-5'cor-10'cor-20'cor-40'QC	D-Glutamine	0	bp				0.19	0.23	1457209	neg460	0		H	neg	31	958556	1.33378e+06	1.07207e+06	1.38734e+06	1.14674e+06	1.14804e+06	1.32055e+06	1020735	767103	1.23517e+06	950699	943486	1.06989e+06	759898	1.33436e+06	1.07145e+06	1.16277e+06	1.17263e+06	1282317	799353	1.01438e+06	968644	1.26416e+06
160.121	22.3187	C7H16N2O2	5	N6-Methyl-L-lysine	7	0	KEGG_Metacyc_HMDB	-0.482003	21.6093	-0.606909	cor-0'cor-5'cor-10'cor-20'cor-40'QC	N6-Methyl-L-lysine	0	bp		0.3	xC13	0.05	0.39	1453992	pos650	0		H	pos	31	1.01865e+06	885474	982818	691480	1.20715e+06	1.04598e+06	1.07048e+06	711044	511565	1278987	810700	733423	908403	654009	1.25704e+06	999620	858045	787268	713600	645743	893346	1.34875e+06	856940
208.095	7.94071	C8H16O6	2	Dambonitol	ppm	0	HMDB	2.12659	-32.1746		cor-0'cor-5'cor-10'cor-20'cor-40'QC	Dambonitol	0	bp				0.48	0.6	1450318	pos651	0		H	pos	31	346515	262587	971366	586218	494972	195659	300588	694820	802015	213466	347542	402119	608771	879062	464492	1.45032e+06	199662	447587	561107	956369	383603	630169	982545
132.126	12.8132										cor-20'QC		0	bp				0.14	1.38	1448184	pos652	0			pos	25	336702	438434	558469	0	1.44818e+06	598983	0	216232	772618	403098	0	268892	312677	0	484445	858885	116438	150077	368299	76636.1	155814	285185	681568
526.152	17.7876										cor-10'QC		0	bp				0.19	1.69	1396558	pos660	0			pos	27	413529	413014	1.39656e+06	48404.9	640004	0	66025.1	300541	237561	30660.9	648767	384688	369141	757213	404540	90031.9	263824	814389	0	421443	71786.6	35699.5	186625
374.23	12.9175		0		0.1			-1.20857	#N/A		cor-0'cor-5'cor-10'cor-20'cor-40'QC	Tsangane L 3-glucoside	0	bp	xCl37			0.19	0.2	1391802	pos661	0		H	pos	31	877032	916737	1.05303e+06	847426	765420	1.10187e+06	975060	961071	731934	925673	677388	777892	806161	754441	878356	719468	951893	961556	1.01144e+06	636819	728811	954012	1.14272e+06
497.865	19.8523										QC		0	bp				0.11	2.45	1383500	pos665	0			pos	11	0	0	0	0	0	739265	100724	24983.1	0	563494	0	0	0	0	0	1.05582e+06	0	0	0	0	0	1.3835e+06	0
372.226	10.533				0.2						cor-0'cor-5'cor-10'cor-20'cor-40'QC		0	bp		C25	xC13	0.09	0.16	1374260	neg463	0			neg	31	1.22149e+06	1.31853e+06	1.13783e+06	1.25972e+06	1.11007e+06	1169488	1.09569e+06	1.28692e+06	1.20828e+06	1044694	1.11057e+06	1.36758e+06	1.09465e+06	1.23739e+06	1.28944e+06	1.13023e+06	1.00682e+06	1.03978e+06	1345234	1.32772e+06	1.06066e+06	1374260	1.30793e+06
346.095	16.6903										cor-0'cor-5'cor-10'cor-20'cor-40'QC		0	bp				0.13	0.5	1373819	pos666	0			pos	31	601036	756574	1303556	347077	768164	378077	583906	805583	586612	409709	627993	759888	784568	680863	1.13378e+06	507905	828168	945183	361235	681399	568008	628588	892255
295.187	4.08529										cor-0'cor-5'cor-10'cor-20'cor-40'QC		0	bp				0.43	0.73	1373692	neg464	0			neg	31	488970	438722	570702	382952	529828	361436	598654	536712	513667	301897	486180	563610	1.37369e+06	420202	390540	179134	370380	971609	1294360	518893	449265	278618	371047
163.955	30.5144										cor-0'cor-5'cor-10'cor-20'cor-40'QC		0	bp				0.16	0.32	1361595	neg466	0			neg	31	860648	1.07628e+06	858360	753569	699860	1.14045e+06	1.00753e+06	1.0748e+06	547375	1.25182e+06	828376	943352	739395	604552	770304	1224350	963593	1.17094e+06	687036	631781	659203	1.31322e+06	975266
126.091	24.1767				0.4						cor-0'cor-5'cor-10'cor-40		0	bp				1.04	1.04	1356240	pos667	0			pos	31	181713	203611	156656	192009	297312	272483	158194	203071	152726	231920	96947.7	294158	319955	364013	258764	220878	305848	166875	112698	960755	380383	332535	315563
169.004	15.0286	C3H7NO5S	1	L-Cysteate	9	0	KEGG_Metacyc_HMDB	-0.686773	0.190641		cor-0'cor-10'cor-20'QC	L-Cysteate	0	bp				0.11	1.1	1349683	neg468	0		H	neg	31	710447	895050	1.34968e+06	92546.1	767719	70112.9	111374	561540	304092	83957.9	637261	294882	335835	582445	960425	113340	522612	648159	75760.9	490505	139150	75070.2	304320
264.106	15.0497							5.9697			cor-0'cor-5'cor-10'cor-20'cor-40'QC		0	bp				0.19	0.19	1348483	pos669	0			pos	31	982903	947197	921414	1.29618e+06	1.18151e+06	1.00226e+06	1.10658e+06	1.10234e+06	753787	1.12995e+06	802264	1.20292e+06	972508	802266	1.17218e+06	915696	1.06525e+06	817058	857741	706018	1.00649e+06	1.01839e+06	1.05021e+06
[truncated: 527 more rows]
[truncated: 23 more columns]

## Sheet: Comparison
Mass	RT	FORMULA	Isomers	Putative metabolite	confidence	Map	Pathway	Groups	cor-0	cor-5	cor-10	cor-20	cor-40	ttest: cor-0	ttest: cor-5	ttest: cor-10	ttest: cor-20	ttest: cor-40	Mean: cor-0	Mean: cor-5	Mean: cor-10	Mean: cor-20	Mean: cor-40	SD: cor-0	SD: cor-5	SD: cor-10	SD: cor-20	SD: cor-40	RSD: cor-0	RSD: cor-5	RSD: cor-10	RSD: cor-20	RSD: cor-40	Fisher: cor-0	Fisher: cor-5	Fisher: cor-10	Fisher: cor-20	Fisher: cor-40	PeakID
[truncated: 1,729 more rows]

[truncated: 23 more sheets: Identification, Rejected, alldata, nMZmatch, pMZmatch, settings, DB, GCstds, RTcalculator, HILIC_Scotmet, pHILIC_Scotmet, User_column, Fragments, Targeted, Method, Samples, TOOLS, Example, Targetlists, RPperms …]
